# Supplementary material
Source: ML conference proceedings conference paper supplement (https://openreview.net/forum?id=Lb8ZnWW_In6)
Supplement: supplementary_material [file attachment]

## Sheet: aqrm
0	0	0	0	0	0	0	0	0	0
0	0	0	0	0	0	0	0	0	0
0	0	0	0	0	0	0	0	0	0
0	0	0	0	0	0	0	0	0	0
0	0	0	0	0	0	0	0	0	0
0	0	0	0	0	0	0	0	0	0
0	0	0	0	0	0	0	0	0	0
0	0	0	0	0	0	0	0	0	0
0	0	0	0	0	0	0	0	0	0
0	0	0	0	0	0	0	0	0	0
0	0	0	0	0	0	0	0	0	0
0	0	0	0	0	0	0	0	0	0
0	0	0	0	0	0	0	0	0	0
0	0	0	0	0	0	0	0	0	0
0	0	0	0	0	0	0	0	0	0
0	0	0	0	0	0	0	0	0	0
0	0	0	0	0	0	0	0	0	0
0	0	0	0	0	0	0	0	0	0
0	0	0	0	0	0	0	0	0	0
0	0	0	0	0	0	0	0	0	0
0	0	0	0	0	0	0	0	0	0
0	0	0	0	0	0	0	0	0	0
0	0	0	0	0	0	0	0	0	0
0	0	0	0	0	0	0	0	0	0
0	0	0	0	0	0	0	0	0	0
0	0	0	0	0	0	0	0	0	0
0	0	0	0	0	0	0	0	0	0
0	0	0	0	0	0	0	0	0	0
0	0	0	0	0	0	0	0	0	0
0	0	0	0	0	0	0	0	0	0
0	0	0	0	0	0	0	0	0	0
0	0	0	0	0	0	0	0	0	0
0	0	0	0	0	0	0	0	0	0
0	0	0	0	0	0	0	0	0	0
0	0	0	0	0	0	0	0	0	0
0	0	0	0	0	0	0	0	0	0
0	0	0	0	0	0	0	0	0	0
0	0	0	0	0	0	0	0	0	0
0	0	0	0	0	0	0	0	0	0
0	0	0	0	0	0	0	0	0	0
0	0	0	0	0	0	0	0	0	0
0	0	0	0	0	0	0	0	0	0
0	0	0	0	0	0	0	0	0	0
0	0	0	0	0	0	0	0	0	0
0	0	0	0	0	0	0	0	0	0
0	0	0	0	0	0	0	0	0	0
0	0	0	0	0	0	0	0	0	0
0	0	0	0	0	0	0	0	0	0
0	0	0	0	0	0	0	0	0	0
0	0	0	0	0	0	0	0	0	0
0	0	0	0	0	0	0	0	0	0
0	0	0	0	0	0	0	0	0	0
0	0	0	0	0	0	0	0	0	0
0	0	0	0	0	0	0	0	0	0
0	0	0	0	0	0	0	0	0	0
0	0	0	0	0	0	0	0	0	0
0	0	0	0	0	0	0	0	0	0
0	0	0	0	0	0	0	0	0	0
0	0	0	0	0	0	0	0	0	0
0	0	0	0	0	0	0	0	0	0
0	0	0	0	0	0	0	0	0	0
0	0	0	0	0	0	0	0	0	0
0	0	0	0	0	0	0	0	0	0
0	0	0	0	0	0	0	0	0	0
0	0	0	0	0	0	0	0	0	0
0	0	0	0	0	0	0	0	0	0
0	0	0	0	0	0	0	0	0	0
0	0	0	0	0	0	0	0	0	0
0	0	0	0	0	0	0	0	0	0
0	0	0	0	0	0	0	0	0	0
0	0	0	0	0	0	0	0	0	0
0	0	0	0	0	0	0	0	0	0
0	0	0	0	0	0	0	0	0	0
0	0	0	0	0	0	0	0	0	0
0	0	0	0	0	0	0	0	0	0
0	0	0	0	0	0	0	0	0	0
0	0	0	0	0	0	0	0	0	0
0	0	0	0	0	0	0	0	0	0
0	0	0	0	0	0	0	0	0	0
0	0	0	0	0	0	0	0	0	0
0	0	0	0	0	0	0	0	0	0
0	0	0	0	0	0	0	0	0	0
0	0	0	0	0	0	0	0	0	0
0	0	0	0	0	0	0	0	0	0
0	0	0	0	0	0	0	0	0	0
0	0	0	0	0	0	0	0	0	0
0	0	0	0	0	0	0	0	0	0
0	0	0	0	0	0	0	0	0	0
0	0	0	0	0	0	0	0	0	0
0	0	0	0	0	0	0	0	0	0
0	0	0	0	0	0	0	0	0	0
0	0	0	0	0	0	0	0	0	0
0	0	0	0	0	0	0	0	0	0
0	0	0	0	0	0	0	0	0	0
0	0	0	0	0	0	0	0	0	0
0	0	0	0	0	0	0	0	0	0
0	0	0	0	0	0	0	0	0	0
0	0	0	0	0	0	0	0	0	0
0	0	0	0	0	0	0	0	0	0
0	0	0	0	0	0	0	0	0	0
0	0	0	0	0	0	0	0	0	0
0	0	0	0	0	0	0	0	0	0
0	0	0	0	0	0	0	0	0	0
0	0	0	0	0	0	0	0	0	0
0	0	0	0	0	0	0	0	0	0
0	0	0	0	0	0	0	0	0	0
0	0	0	0	0	0	0	0	0	0
0	0	0	0	0	0	0	0	0	0
0	0	0	0	0	0	0	0	0	0
0	0	0	0	0	0	0	0	0	0
0	0	0	0	0	0	0	0	0	0
0	0	0	0	0	0	0	0	0	0
0	0	0	0	0	0	0	0	0	0
0	0	0	0	0	0	0	0	0	0
0	0	0	0	0	0	0	0	0	0
0	0	0	0	0	0	0	0	0	0
0	0	0	0	0	0	0	0	0	0
0	0	0	0	0	0	0	0	0	0
0	0	0	0	0	0	0	0	0	0
0	0	0	0	0	0	0	0	0	0
0	0	0	0	0	0	0	0	0	0
0	0	0	0	0	0	0	0	0	0
0	0	0	0	0	0	0	0	0	0
0	0	0	0	0	0	0	0	0	0
0	0	0	0	0	0	0	0	0	0
0	0	0	0	0	0	0	0	0	0
0	0	0	0	0	0	0	0	0	0
0	0	0	0	0	0	0	0	0	0
0	0	0	0	0	0	0	0	0	0
0	0	0	0	0	0	0	0	0	0
0	0	0	0	0	0	0	0	0	0
0	0	0	0	0	0	0	0	0	0
0	0	0	0	0	0	0	0	0	0
0	0	0	0	0	0	0	0	0	0
0	0	0	0	0	0	0	0	0	0
0	0	0	0	0	0	0	0	0	0
0	0	0	0	0	0	0	0	0	0
0	0	0	0	0	0	0	0	0	0
0	0	0	0	0	0	0	0	0	0
0	0	0	0	0	0	0	0	0	0
0	0	0	0	0	0	0	0	0	0
0	0	0	0	0	0	0	0	0	0
0	0	0	0	0	0	0	0	0	0
0	0	0	0	0	0	0	0	0	0
0	0	0	0	0	0	0	0	0	0
0	0	0	0	0	0	0	0	0	0
0	0	0	0	0	0	0	0	0	0
0	0	0	0	0	0	0	0	0	0
0	0	0	0	0	0	0	0	0	0
0	0	0	0	0	0	0	0	0	0
0	0	0	0	0	0	0	0	0	0
0	0	0	0	0	0	0	0	0	0
0	0	0	0	0	0	0	0	0	0
0	0	0	0	0	0	0	0	0	0
0	0	0	0	0	0	0	0	0	0
0	0	0	0	0	0	0	0	0	0
0	0	0	0	0	0	0	0	0	0
0	0	0	0	0	0	0	0	0	0
0	0	0	0	0	0	0	0	0	0
0	0	0	0	0	0	0	0	0	0
0	0	0	0	0	0	0	0	0	0
0	0	0	0	0	0	0	0	0	0
0	0	0	0	0	0	0	0	0	0
0	0	0	0	0	0	0	0	0	0
0	0	0	0	0	0	0	0	0	0
0	0	0	0	0	0	0	0	0	0
0	0	0	0	0	0	0	0	0	0
0	0	0	0	0	0	0	0	0	0
0	0	0	0	0	0	0	0	0	0
0	0	0	0	0	0	0	0	0	0
0	0	0	0	0	0	0	0	0	0
0	0	0	0	0	0	0	0	0	0
0	0	0	0	0	0	0	0	0	0
0	0	0	0	0	0	0	0	0	0
0	0	0	0	0	0	0	0	0	0
0	0	0	0	0	0	0	0	0	0
0	0	0	0	0	0	0	0	0	0
0	0	0	0	0	0	0	0	0	0
0	0	0	0	0	0	0	0	0	0
0	0	0	0	0	0	0	0	0	0
0	0	0	0	0	0	0	0	0	0
0	0	0	0	0	0	0	0	0	0
0	0	0	0	0	0	0	0	0	0
0	0	0	0	0	0	0	0	0	0
0	0	0	0	0	0	0	0	0	0
0	0	0	0	0	0	0	0	0	0
0	0	0	0	0	0	0	0	0	0
0	0	0	0	0	0	0	0	0	0
0	0	0	0	0	0	0	0	0	0
0	0	0	0	0	0	0	0	0	0
0	0	0	0	0	0	0	0	0	0
0	0	0	0	0	0	0	0	0	0
0	0	0	0	0	0	0	0	0	0
0	0	0	0	0	0	0	0	0	0
0	0	0	0	0	0	0	0	0	0
0	0	0	0	0	0	0	0	0	0
0	0	0	0	0	0	0	0	0	0
0	0	0	0	0	0	0	0	0	0
0	0	0	0	0	0	0	0	0	0
0	0	0	0	0	0	0	0	0	0
0	0	0	0	0	0	0	0	0	0
0	0	0	0	0	0	0	0	0	0
0	0	0	0	0	0	0	0	0	0
0	0	0	0	0	0	0	0	0	0
0	0	0	0	0	0	0	0	0	0
0	0	0	0	0	0	0	0	0	0
0	0	0	0	0	0	0	0	0	0
0	0	0	0	0	0	0	0	0	0
0	0	0	0	0	0	0	0	0	0
0	0	0	0	0	0	0	0	0	0
0	0	0	0	0	0	0	0	0	0
0	0	0	0	0	0	0	0	0	0
0	0	0	0	0	0	0	0	0	0
0	0	0	0	0	0	0	0	0	0
0	0	0	0	0	0	0	0	0	0
0	0	0	0	0	0	0	0	0	0
0	0	0	0	0	0	0	0	0	0
0	0	0	0	0	0	0	0	0	0
0	0	0	0	0	0	0	0	0	0
0	0	0	0	0	0	0	0	0	0
0	0	0	0	0	0	0	0	0	0
0	0	0	0	0	0	0	0	0	0
0	0	0	0	0	0	0	0	0	0
0	0	0	0	0	0	0	0	0	0
0	0	0	0	0	0	0	0	0	0
0	0	0	0	0	0	0	0	0	0
0	0	0	0	0	0	0	0	0	0
0	0	0	0	0	0	0	0	0	0
0	0	0	0	0	0	0	0	0	0
0	0	0	0	0	0	0	0	0	0
0	0	0	0	0	0	0	0	0	0
0	0	0	0	0	0	0	0	0	0
0	0	0	0	0	0	0	0	0	0
0	0	0	0	0	0	0	0	0	0
0	0	0	0	0	0	0	0	0	0
0	0	0	0	0	0	0	0	0	0
0	0	0	0	0	0	0	0	0	0
0	0	0	0	0	0	0	0	0	0
0	0	0	0	0	0	0	0	0	0
0	0	0	0	0	0	0	0	0	0
0	0	0	0	0	0	0	0	0	0
0	0	0	0	0	0	0	0	0	0
0	0	0	0	0	0	0	0	0	0
0	0	0	0	0	0	0	0	0	0
0	0	0	0	0	0	0	0	0	0
0	0	0	0	0	0	0	0	0	0
0	0	0	0	0	0	0	0	0	0
0	0	0	0	0	0	0	0	0	0
0	0	0	0	0	0	0	0	0	0
0	0	0	0	0	0	0	0	0	0
0	0	0	0	0	0	0	0	0	0
0	0	0	0	0	0	0	0	0	0
0	0	0	0	0	0	0	0	0	0
0	0	0	0	0	0	0	0	0	0
0	0	0	0	0	0	0	0	0	0
0	0	0	0	0	0	0	0	0	0
0	0	0	0	0	0	0	0	0	0
0	0	0	0	0	0	0	0	0	0
0	0	0	0	0	0	0	0	0	0
0	0	0	0	0	0	0	0	0	0
0	0	0	0	0	0	0	0	0	0
0	0	0	0	0	0	0	0	0	0
0	0	0	0	0	0	0	0	0	0
0	0	0	0	0	0	0	0	0	0
0	0	0	0	0	0	0	0	0	0
0	0	0	0	0	0	0	0	0	0
0	0	0	0	0	0	0	0	0	0
0	0	0	0	0	0	0	0	0	0
0	0	0	0	0	0	0	0	0	0
0	0	0	0	0	0	0	0	0	0
0	0	0	0	0	0	0	0	0	0
0	0	0	0	0	0	0	0	0	0
0	0	0	0	0	0	0	0	0	0
0	0	0	0	0	0	0	0	0	0
0	0	0	0	0	0	0	0	0	0
0	0	0	0	0	0	0	0	0	0
0	0	0	0	0	0	0	0	0	0
0	0	0	0	0	0	0	0	0	0
0	0	0	0	0	0	0	0	0	0
0	0	0	0	0	0	0	0	0	0
0	0	0	0	0	0	0	0	0	0
0	0	0	0	0	0	0	0	0	0
0	0	0	0	0	0	0	0	0	0
0	0	0	0	0	0	0	0	0	0
0	0	0	0	0	0	0	0	0	0
0	0	0	0	0	0	0	0	0	0
0	0	0	0	0	0	0	0	0	0
0	0	0	0	0	0	0	0	0	0
0	0	0	0	0	0	0	0	0	0
0	0	0	0	0	0	0	0	0	0
0	0	0	0	0	0	0	0	0	0
0	0	0	0	0	0	0	0	0	0
0	0	0	0	0	0	0	0	0	0
0	0	0	0	0	0	0	0	0	0
0	0	0	0	0	0	0	0	0	0
0	0	0	0	0	0	0	0	0	0
0	0	0	0	0	0	0	0	0	0
0	0	0	0	0	0	0	0	0	0
0	0	0	0	0	0	0	0	0	0
0	0	0	0	0	0	0	0	0	0
0	0	0	0	0	0	0	0	0	0
0	0	0	0	0	0	0	0	0	0
0	0	0	0	0	0	0	0	0	0
0	0	0	0	0	0	0	0	0	0
0	0	0	0	0	0	0	0	0	0
0	0	0	0	0	0	0	0	0	0
0	0	0	0	0	0	0	0	0	0
0	0	0	0	0	0	0	0	0	0
0	0	0	0	0	0	0	0	0	0
0	0	0	0	0	0	0	0	0	0
0	0	0	0	0	0	0	0	0	0
0	0	0	0	0	0	0	0	0	0
0	0	0	0	0	0	0	0	0	0
0	0	0	0	0	0	0	0	0	0
0	0	0	0	0	0	0	0	0	0
0	0	0	0	0	0	0	0	0	0
0	0	0	0	0	0	0	0	0	0
0	0	0	0	0	0	0	0	0	0
0	0	0	0	0	0	0	0	0	0
0	0	0	0	0	0	0	0	0	0
0	0	0	0	0	0	0	0	0	0
0	0	0	0	0	0	0	0	0	0
0	0	0	0	0	0	0	0	0	0
0	0	0	0	0	0	0	0	0	0
0	0	0	0	0	0	0	0	0	0
0	0	0	0	0	0	0	0	0	0
0	0	0	0	0	0	0	0	0	0
0	0	0	0	0	0	0	0	0	0
0	0	0	0	0	0	0	0	0	0
0	0	0	0	0	0	0	0	0	0
0	0	0	0	0	0	0	0	0	0
0	0	0	0	0	0	0	0	0	0
0	0	0	0	0	0	0	0	0	0
0	0	0	0	0	0	0	0	0	0
0	0	0	0	0	0	0	0	0	0
0	0	0	0	0	0	0	0	0	0
0	0	0	0	0	0	0	0	0	0
0	0	0	0	0	0	0	0	0	0
0	0	0	0	0	0	0	0	0	0
0	0	0	0	0	0	0	0	0	0
0	0	0	0	0	0	0	0	0	0
0	0	0	0	0	0	0	0	0	0
0	0	0	0	0	0	0	0	0	0
0	0	0	0	0	0	0	0	0	0
0	0	0	0	0	0	0	0	0	0
0	0	0	0	0	0	0	0	0	0
0	0	0	0	0	0	0	0	0	0
0	0	0	0	0	0	0	0	0	0
0	0	0	0	0	0	0	0	0	0
0	0	0	0	0	0	0	0	0	0
0	0	0	0	0	0	0	0	0	0
0	0	0	0	0	0	0	0	0	0
0	0	0	0	0	0	0	0	0	0
0	0	0	0	0	0	0	0	0	0
0	0	0	0	0	0	0	0	0	0
0	0	0	0	0	0	0	0	0	0
0	0	0	0	0	0	0	0	0	0
0	0	0	0	0	0	0	0	0	0
0	0	0	0	0	0	0	0	0	0
0	0	0	0	0	0	0	0	0	0
0	0	0	0	0	0	0	0	0	0
0	0	0	0	0	0	0	0	0	0
0	0	0	0	0	0	0	0	0	0
0	0	0	0	0	0	0	0	0	0
0	0	0	0	0	0	0	0	0	0
0	0	0	0	0	0	0	0	0	0
0	0	0	0	0	0	0	0	0	0
0	0	0	0	0	0	0	0	0	0
0	0	0	0	0	0	0	0	0	0
0	0	0	0	0	0	0	0	0	0
0	0	0	0	0	0	0	0	0	0
0	0	0	0	0	0	0	0	0	0
0	0	0	0	0	0	0	0	0	0
0	0	0	0	0	0	0	0	0	0
0	0	0	0	0	0	0	0	0	0
0	0	0	0	0	0	0	0	0	0
0	0	0	0	0	0	0	0	0	0
0	0	0	0	0	0	0	0	0	0
0	0	0	0	0	0	0	0	0	0
0	0	0	0	0	0	0	0	0	0
0	0	0	0	0	0	0	0	0	0
0	0	0	0	0	0	0	0	0	0
0	0	0	0	0	0	0	0	0	0
0	0	0	0	0	0	0	0	0	0
0	0	0	0	0	0	0	0	0	0
0	0	0	0	0	0	0	0	0	0
0	0	0	0	0	0	0	0	0	0
0	0	0	0	0	0	0	0	0	0
0	0	0	0	0	0	0	0	0	0
0	0	0	0	0	0	0	0	0	0
0	0	0	0	0	0	0	0	0	0
0	0	0	0	0	0	0	0	0	0
0	0	0	0	0	0	0	0	0	0
0	0	0	0	0	0	0	0	0	0
0	0	0	0	0	0	0	0	0	0
0	0	0	0	0	0	0	0	0	0
0	0	0	0	0	0	0	0	0	0
0	0	1	0	0	0	0	0	0	0
0	0	0	0	0	0	0	0	0	0
0	0	1	0	0	0	0	0	0	0
0	0	0	0	0	0	0	0	0	0
0	0	0	0	0	0	0	0	0	0
0	0	0	0	0	0	0	0	0	0
0	0	1	0	0	0	0	0	0	0
0	0	1	0	0	0	0	0	0	0
0	0	1	0	0	0	0	0	0	0
0	0	1	0	0	0	0	0	0	0
0	0	1	0	0	0	0	0	0	0
0	0	1	0	0	0	0	0	0	0
0	0	1	0	0	0	0	0	0	0
0	0	1	0	0	0	0	0	0	0
0	0	1	0	0	0	0	0	0	0
0	0	0	0	0	0	0	0	0	0
0	0	0	0	0	0	0	0	0	0
0	0	0	0	0	0	0	0	0	0
0	0	0	0	0	0	0	0	0	0
0	0	0	0	0	0	0	0	0	0
0	0	0	0	0	0	0	0	0	0
0	0	0	0	0	0	0	0	0	0
0	0	0	0	0	0	0	0	0	0
0	0	0	0	0	0	0	0	0	0
0	0	0	0	0	0	0	0	0	0
0	0	0	0	0	0	0	0	0	0
0	0	0	0	0	0	0	0	0	0
0	0	0	0	0	0	0	0	0	0
0	0	0	0	0	0	0	0	0	0
0	0	0	0	0	0	0	0	0	0
0	0	0	0	0	0	0	0	0	0
0	0	0	0	0	0	0	0	0	0
0	0	0	0	0	0	0	0	0	0
0	0	0	0	0	0	0	0	0	0
0	0	0	0	0	0	0	0	0	0
0	0	1	0	0	0	0	0	0	0
0	0	1	0	0	0	0	0	0	0
0	0	1	0	0	0	0	0	0	0
0	0	1	0	0	0	0	0	0	0
0	0	1	0	0	0	0	0	0	0
0	0	1	0	0	0	0	0	0	0
0	0	1	0	0	0	0	0	0	0
0	0	1	0	0	0	0	0	0	0
0	0	1	0	0	0	0	0	0	0
0	0	1	0	0	0	0	0	0	0
0	0	0	0	0	0	0	0	0	0
0	0	0	0	0	0	0	0	0	1
0	0	0	0	0	0	0	0	0	1
0	0	0	0	0	0	0	0	0	1
0	0	0	0	0	0	0	0	0	1
0	0	0	0	0	0	0	0	0	1
0	0	0	0	0	0	0	0	0	1
0	0	0	0	0	0	0	0	0	0
0	0	0	0	0	0	0	0	0	0
0	0	0	0	0	0	0	0	0	0
0	0	0	0	0	0	0	0	0	0
0	0	0	0	0	0	0	0	0	0
0	0	0	0	0	0	0	0	0	0
0	0	1	0	0	0	0	0	0	0
0	0	0	0	0	0	0	0	0	0
0	0	0	0	0	0	0	0	0	0
0	0	0	0	0	0	0	0	0	0
0	0	0	0	0	0	0	0	0	0
0	0	1	0	0	0	0	0	0	0
0	0	1	0	0	0	0	0	0	0
0	0	0	0	0	0	0	0	0	0
0	0	1	0	0	0	0	0	0	0
0	0	1	0	0	0	0	0	0	0
0	0	1	0	0	0	0	0	0	0
0	0	1	0	0	0	0	0	0	1
0	0	1	0	0	0	0	0	0	0
0	0	1	0	0	0	0	0	0	0
0	0	1	0	0	0	0	0	0	1
0	0	1	0	0	0	0	0	0	1
0	0	1	0	0	0	0	0	0	1
0	0	1	0	0	0	0	0	0	1
0	0	1	0	0	0	0	0	0	1
0	0	1	0	0	0	0	0	0	1
0	0	1	0	0	0	0	0	0	1
0	0	1	0	0	0	0	0	0	1
0	0	1	0	0	0	0	0	0	1
0	0	1	0	0	0	0	0	0	1
0	0	1	0	0	0	0	0	0	0
0	0	0	0	0	0	0	0	0	0
0	0	0	0	0	0	0	0	0	0
0	0	0	0	0	0	0	0	0	0
0	0	0	0	0	0	0	0	0	0
0	0	0	0	0	0	0	0	0	0
0	0	0	0	0	0	0	0	0	0
0	0	0	0	0	0	0	0	0	0
0	0	0	0	0	0	0	0	0	0
0	0	0	0	0	0	0	0	0	0
0	0	0	0	0	0	0	0	0	0
0	0	0	0	0	0	0	0	0	0
0	0	0	0	0	0	0	0	0	0
0	0	0	0	0	0	0	0	0	0
0	0	0	0	0	0	0	0	0	1
0	0	0	0	0	0	0	0	0	0
0	0	0	0	0	0	0	0	0	0
0	0	1	0	0	0	0	0	0	1
0	0	0	0	0	0	0	0	0	1
0	0	1	0	0	0	0	0	0	0
0	0	0	0	0	0	0	0	0	0
0	0	1	0	0	0	0	0	0	0
0	0	1	0	0	0	0	0	0	1
1	0	1	0	0	0	0	0	0	1
0	0	1	0	0	0	0	0	0	1
0	0	1	0	0	0	0	0	0	1
0	0	1	0	0	0	0	0	0	1
0	0	1	0	0	0	0	0	0	1
0	0	1	0	0	0	0	0	0	1
1	0	1	0	0	0	0	0	0	1
1	0	1	0	0	0	0	0	0	1
1	0	1	0	0	0	0	0	0	1
1	0	1	0	0	0	0	0	0	1
1	0	1	0	0	0	0	0	0	1
1	0	1	0	0	0	0	0	0	1
1	0	1	0	0	0	0	0	0	1
1	0	1	0	0	0	0	0	0	1
1	0	1	0	0	0	0	0	0	1
1	0	1	0	0	0	0	0	0	1
0	0	1	0	0	0	0	0	0	1
0	0	1	0	0	0	0	0	0	1
0	0	1	0	0	0	0	0	0	1
0	0	1	0	0	0	0	0	0	1
0	0	1	0	0	0	0	0	0	1
0	0	1	0	0	0	0	0	0	1
0	0	1	0	0	0	0	0	0	1
0	0	1	0	0	0	0	0	0	1
0	0	1	0	0	0	0	0	0	1
0	0	1	0	0	0	0	0	0	1
0	0	1	0	0	0	0	0	0	1
0	0	1	0	0	0	0	0	0	1
0	0	1	0	0	0	0	0	0	1
0	0	1	0	0	0	0	0	0	1
0	0	1	0	0	0	0	0	0	1
0	0	1	0	0	0	0	0	0	1
0	0	1	0	0	0	0	0	0	1
1	0	1	0	0	0	0	0	0	1
0	0	1	0	0	0	0	0	0	1
1	0	1	0	0	0	0	0	0	1
1	0	1	0	0	0	0	0	0	1
1	0	1	0	0	0	0	0	0	1
1	0	1	0	0	0	0	0	0	1
1	0	1	0	0	0	0	0	0	1
1	0	1	0	0	0	0	0	0	1
1	0	1	0	0	0	0	0	0	1
1	0	1	0	0	0	0	0	0	1
1	0	1	0	0	0	0	0	0	1
1	0	1	0	0	0	0	0	0	1
1	0	1	0	0	0	0	0	0	1
1	0	1	0	0	0	0	0	0	1
0	0	1	0	0	0	0	0	0	1
0	0	1	0	0	0	0	0	0	1
0	0	1	0	0	0	0	0	0	1
0	0	1	0	0	0	0	0	0	1
0	0	1	0	0	0	0	0	0	1
0	0	1	0	0	0	0	0	0	1
0	0	1	0	0	0	0	0	0	1
0	0	1	0	0	0	0	0	0	1
0	0	1	0	0	0	0	0	0	1
0	0	1	0	0	0	0	0	0	1
0	0	1	0	0	0	0	0	0	1
0	0	1	0	0	0	0	0	0	1
0	0	1	0	0	0	0	0	0	1
0	0	1	0	0	0	0	0	0	1
0	0	1	0	0	0	0	0	0	1
0	0	1	0	0	0	0	0	0	1
0	0	1	0	0	0	0	0	0	1
0	0	1	0	0	0	0	0	0	1
1	0	1	0	0	0	0	0	0	1
0	0	1	0	0	0	0	0	0	1
1	0	1	0	0	0	0	0	0	1
1	0	1	0	0	0	0	0	0	1
1	0	1	0	0	0	0	0	0	1
1	0	1	0	0	0	0	0	0	1
1	0	1	0	0	0	0	0	0	1
1	0	1	0	0	0	0	0	0	1
1	0	1	0	0	0	0	0	0	1
1	0	1	0	0	0	0	0	0	1
1	0	1	0	0	0	0	0	0	1
1	0	1	0	0	0	0	0	0	1
1	0	1	0	0	0	0	0	0	1
1	0	1	0	0	0	0	0	0	1
1	0	1	0	0	0	0	0	0	1
0	0	1	0	0	0	0	0	0	1
0	0	1	0	0	0	0	0	0	1
0	0	1	0	0	0	0	0	0	1
0	0	1	0	0	0	0	0	0	1
0	0	1	0	0	0	0	0	0	1
0	0	1	0	0	0	0	0	0	1
0	0	1	0	0	0	0	0	0	1
0	0	1	0	0	0	0	0	0	1
0	0	1	0	0	0	0	0	0	1
0	0	1	0	0	0	0	0	0	1
0	0	1	0	0	0	0	0	0	1
0	0	1	0	0	0	0	0	0	1
0	0	1	0	0	0	0	0	0	1
0	0	1	0	0	0	0	0	0	1
0	0	1	0	0	0	0	0	0	1
0	0	1	0	0	0	0	0	0	1
0	0	1	0	0	0	0	0	0	1
0	0	1	0	0	0	0	0	0	1
0	0	1	0	0	0	0	0	0	1
1	0	1	0	0	0	0	0	0	1
1	0	1	0	0	0	0	0	0	1
1	0	1	0	0	0	0	0	0	1
1	0	1	0	0	0	0	0	0	1
1	0	1	0	0	0	0	0	0	1
1	1	1	0	0	0	0	0	0	1
1	1	1	0	0	0	0	0	0	1
1	0	1	0	0	0	0	0	0	1
1	1	1	0	0	0	0	0	0	1
1	1	1	0	0	0	0	0	0	1
1	1	1	0	0	0	0	0	0	1
1	1	1	0	0	0	0	0	0	1
1	1	1	0	0	0	0	0	0	1
1	1	1	0	0	0	0	0	0	1
1	1	1	0	0	0	0	0	0	1
1	1	1	0	0	0	0	0	0	1
1	1	1	0	0	0	0	0	0	1
1	1	1	0	0	0	0	0	0	1
1	0	1	0	0	0	0	0	0	1
1	0	1	0	0	0	0	0	0	1
1	0	1	0	0	0	0	0	0	1
1	0	1	0	0	0	0	0	0	1
1	0	1	0	0	0	0	0	0	1
1	0	1	0	0	0	0	0	0	1
1	0	1	0	0	0	0	0	0	1
1	0	1	0	0	0	0	0	0	1
1	0	1	0	0	0	0	0	0	1
1	0	1	0	0	0	0	0	0	1
1	0	1	0	0	0	0	0	0	1
1	1	1	0	0	0	0	0	0	1
1	0	1	0	0	0	0	0	0	1
1	0	1	0	0	0	0	0	0	1
1	0	1	0	0	0	0	0	0	1
1	0	1	0	0	0	0	0	0	1
1	0	1	0	0	0	0	0	0	1
1	1	1	0	0	0	0	0	0	1
1	1	1	0	0	0	0	0	0	1
1	0	1	0	0	0	0	0	0	1
1	1	1	0	0	0	0	0	0	1
1	1	1	0	0	0	0	0	0	1
1	1	1	0	0	0	0	0	0	1
1	1	1	0	0	0	0	0	0	1
1	1	1	0	0	0	0	0	0	1
1	1	1	0	0	0	0	0	0	1
1	1	1	0	0	0	0	0	0	1
1	1	1	0	0	0	0	0	0	1
1	1	1	0	0	0	0	0	0	1
1	1	1	0	0	0	0	0	0	1
1	1	1	0	0	0	0	0	0	1
1	1	1	0	0	0	0	0	0	1
1	1	1	0	0	0	0	0	0	1
1	1	1	0	0	0	1	0	0	1
1	1	1	0	0	0	1	0	0	1
1	1	1	0	0	0	1	0	0	1
1	1	1	0	0	0	1	0	0	1
1	1	1	0	0	0	1	0	0	1
1	1	1	0	0	0	1	0	0	1
1	1	1	0	0	0	1	1	0	1
1	1	1	0	0	0	1	1	0	1
1	1	1	0	0	0	1	1	0	1
1	0	1	0	0	0	1	0	0	1
1	0	1	0	0	0	1	0	0	1
1	0	1	0	0	0	1	0	0	1
1	0	1	0	0	0	0	0	0	1
1	0	1	0	0	0	0	0	0	1
1	0	1	0	0	0	0	0	0	1
1	0	1	0	0	0	0	0	0	1
1	0	1	0	0	0	0	0	0	1
1	0	1	0	0	0	0	0	0	1
1	0	1	0	0	0	0	0	0	1
1	0	1	0	0	0	0	0	0	1
1	0	1	0	0	0	0	1	0	1
1	0	1	0	0	0	0	0	0	1
1	0	1	0	0	0	0	0	0	1
1	0	1	0	0	0	0	0	0	1
1	0	1	0	0	0	0	1	0	1
1	0	1	0	0	0	0	0	0	1
1	1	1	0	0	0	1	0	0	1
1	1	1	0	0	0	0	1	0	1
1	1	1	0	0	0	0	1	0	1
1	0	1	0	0	0	1	1	0	1
1	1	1	0	0	0	0	1	0	1
1	1	1	0	0	0	1	1	0	1
1	1	1	0	0	0	1	1	0	1
1	1	1	0	0	0	0	1	0	1
1	1	1	0	0	0	1	1	0	1
1	1	1	0	0	0	1	1	0	1
1	1	1	0	0	0	1	1	0	1
1	1	1	1	0	0	1	1	0	1
1	1	1	0	0	0	1	0	0	1
1	1	1	0	0	0	1	0	0	1
1	1	1	0	0	0	1	0	0	1
1	1	1	0	0	0	1	0	0	1
1	1	1	0	0	0	1	0	0	1
1	1	1	0	0	0	1	0	0	1
1	1	1	1	0	0	1	0	0	1
1	1	1	0	0	0	1	0	0	1
1	1	1	1	0	0	1	0	0	1
1	1	1	1	0	0	1	0	0	1
1	1	1	1	0	0	1	0	0	1
1	1	1	1	0	0	1	0	0	1
1	1	1	1	0	0	1	1	0	1
1	1	1	1	0	0	1	0	0	1
1	1	1	1	0	0	1	1	0	1
1	0	1	1	0	0	1	1	0	1
1	0	1	1	0	0	1	0	0	1
1	0	1	1	0	0	1	0	0	1
1	0	1	1	0	0	1	0	0	1
1	0	1	1	0	0	0	0	0	1
1	0	1	0	0	0	0	1	0	1
1	0	1	0	0	0	0	1	0	1
1	0	1	0	0	0	0	1	0	1
1	0	1	0	0	0	0	1	0	1
1	0	1	0	0	0	0	1	0	1
1	0	1	0	0	0	0	1	0	1
1	1	1	0	0	0	0	1	0	1
1	0	1	0	0	0	0	1	0	1
1	0	1	0	0	0	0	1	0	1
1	0	1	0	0	0	0	1	0	1
1	0	1	0	0	0	0	1	0	1
1	0	1	0	0	0	0	1	0	1
1	0	1	0	0	0	1	0	0	1
1	1	1	0	0	0	0	0	0	1
1	1	1	1	0	0	0	0	0	1
1	1	1	0	0	0	0	0	0	1
1	1	1	0	0	0	0	0	0	1
1	1	1	0	0	0	0	0	0	1
1	1	1	1	0	0	1	0	0	1
1	1	1	1	0	0	1	0	0	1
1	1	1	1	0	0	1	0	0	1
1	1	1	1	0	0	1	1	0	1
1	1	1	1	0	0	1	0	0	1
1	1	1	1	0	0	1	0	0	1
1	1	1	1	0	0	1	0	0	1
1	1	1	1	0	0	1	0	0	1
1	1	1	1	0	0	1	0	0	1
1	1	1	1	0	0	1	0	0	1
1	1	1	1	0	0	1	0	0	1
1	1	1	1	0	0	1	1	0	1
1	1	1	0	0	0	1	1	0	1
1	1	1	0	0	0	1	1	0	1
1	1	1	0	0	0	1	0	0	1
1	1	1	0	0	0	1	1	0	1
1	1	1	0	0	0	1	1	0	1
1	1	1	0	0	0	1	1	0	1
1	1	1	0	0	0	1	1	0	1
1	1	1	0	0	0	1	1	0	1
1	1	1	0	0	0	1	1	0	1
1	1	1	0	0	0	1	1	0	1
1	1	1	1	0	0	1	1	0	1
1	1	1	0	0	0	1	1	0	1
1	1	1	0	0	0	1	1	0	1
1	1	1	0	0	0	1	1	0	1
1	1	1	0	0	0	1	1	0	1
1	1	1	0	0	0	0	1	0	1
1	1	1	0	0	0	0	1	0	1
1	1	1	1	0	0	0	1	0	1
1	1	1	0	0	0	0	1	0	1
1	1	1	1	0	0	0	1	0	1
1	1	1	1	0	0	0	1	0	1
1	1	1	1	0	0	0	1	0	1
1	1	1	1	1	0	0	1	0	1
1	1	1	1	0	0	0	1	0	1
1	1	1	1	1	0	0	1	0	1
1	1	1	1	1	0	0	1	0	1
1	1	1	1	1	0	1	1	0	1
1	1	1	1	0	0	0	1	0	1
1	1	1	1	0	0	1	1	0	1
1	1	1	1	0	0	1	1	0	1
1	1	1	1	0	0	0	1	0	1
1	1	1	1	0	0	1	1	0	1
1	1	1	1	0	0	0	1	0	1
1	1	1	1	0	0	0	1	0	1
1	1	1	1	0	0	0	1	0	1
1	1	1	1	0	0	1	1	0	1
1	1	1	1	0	0	1	1	0	1
1	1	1	1	0	0	1	1	0	1
1	1	1	1	0	0	1	1	0	1
1	1	1	1	0	0	1	1	0	1
1	1	1	1	1	0	1	1	0	1
1	1	1	1	0	0	1	1	0	1
1	1	1	1	0	0	1	1	0	1
1	1	1	1	1	0	1	1	0	1
1	1	1	1	0	0	1	1	0	1
1	1	1	1	0	0	1	1	0	1
1	1	1	1	0	0	1	1	0	1
1	1	1	1	1	0	1	1	0	1
1	1	1	1	1	0	1	1	0	1
1	1	1	1	1	0	1	1	0	1
1	1	1	1	1	0	1	1	0	1
1	1	1	1	1	0	1	1	0	1
1	1	1	1	1	0	1	1	0	1
1	1	1	1	1	0	1	1	0	1
1	1	1	1	1	0	1	1	0	1
1	1	1	1	1	0	1	1	0	1
1	1	1	1	1	0	1	1	0	1
1	1	1	1	0	0	1	1	0	1
1	1	1	1	0	0	1	1	0	1
1	1	1	1	0	0	1	1	0	1
1	1	1	1	0	0	1	1	0	1
1	1	1	1	0	0	1	1	0	1
1	1	1	1	0	0	1	1	0	1
1	1	1	1	0	0	1	1	0	1
1	1	1	1	0	0	1	1	0	1
1	1	1	1	0	0	1	1	0	1
1	1	1	1	0	0	1	1	0	1
1	1	1	1	0	0	1	1	0	1
1	1	1	1	1	0	1	1	0	1
1	1	1	1	0	0	1	1	0	1
1	1	1	1	0	0	1	1	0	1
1	1	1	1	0	0	1	1	0	1
1	1	1	1	0	0	1	1	0	1
1	1	1	1	0	0	1	1	0	1
1	1	1	1	0	0	1	1	0	1
1	1	1	1	0	0	1	1	0	1
1	1	1	1	0	0	1	1	0	1
1	1	1	1	1	0	1	1	0	1
1	1	1	1	1	0	1	1	0	1
1	1	1	1	1	0	1	1	0	1
1	1	1	1	1	0	1	1	0	1
1	1	1	1	1	0	1	1	0	1
1	1	1	1	1	0	1	1	0	1
1	1	1	1	1	0	1	1	0	1
1	1	1	1	1	0	1	1	0	1
1	1	1	1	1	0	1	1	0	1
1	1	1	1	1	0	1	1	0	1
1	1	1	1	1	0	1	1	0	1
1	1	1	1	1	0	1	1	0	1
1	1	1	1	1	0	1	1	0	1
1	1	1	1	1	0	1	1	0	1
1	1	1	1	1	0	1	1	0	1
1	1	1	1	1	0	1	1	0	1
1	1	1	1	0	0	1	1	0	1
1	1	1	1	0	0	1	1	0	1
1	1	1	1	0	0	1	1	0	1
1	1	1	1	0	0	1	1	0	1
1	1	1	1	0	0	1	1	0	1
1	1	1	1	0	0	1	1	0	1
1	1	1	1	0	0	1	1	0	1
1	1	1	1	0	0	1	1	0	1
1	1	1	1	0	0	1	1	0	1
1	1	1	1	0	0	1	1	0	1
1	1	1	1	0	0	1	1	0	1
1	1	1	1	0	0	1	1	0	1
1	1	1	1	0	0	1	1	0	1
1	1	1	1	0	0	1	1	0	1
1	1	1	1	0	0	1	1	0	1
1	1	1	1	0	0	1	1	0	1
1	1	1	1	0	0	1	1	0	1
1	1	1	1	0	0	1	1	0	1
1	1	1	1	0	0	1	1	0	1
1	1	1	1	1	0	1	1	0	1
1	1	1	1	1	0	1	1	0	1
1	1	1	1	1	0	1	1	0	1
1	1	1	1	1	0	1	1	0	1
1	1	1	1	1	0	1	1	0	1
1	1	1	1	1	0	1	1	0	1
1	1	1	1	1	0	1	1	0	1
1	1	1	1	1	0	1	1	0	1
1	1	1	1	1	0	1	1	0	1
1	1	1	1	1	0	1	1	0	1
1	1	1	1	1	0	1	1	0	1
1	1	1	1	1	0	1	1	0	1
1	1	1	1	1	0	1	1	0	1
1	1	1	1	1	0	1	1	0	1
1	1	1	1	1	0	1	1	0	1
1	1	1	1	1	0	1	1	0	1
1	1	1	1	1	0	1	1	0	1
1	1	1	1	1	0	1	1	0	1
1	1	1	1	1	0	1	1	0	1
1	1	1	1	1	0	1	1	0	1
1	1	1	1	1	0	1	1	0	1
1	1	1	1	1	0	1	1	0	1
1	1	1	1	1	0	1	1	0	1
1	1	1	1	1	0	1	1	0	1
1	1	1	1	0	0	1	1	0	1
1	1	1	1	0	0	1	1	0	1
1	1	1	1	0	0	1	1	0	1
1	1	1	1	0	0	1	1	0	1
1	1	1	1	0	0	1	1	0	1
1	1	1	1	0	0	1	1	0	1
1	1	1	1	0	0	1	1	0	1
1	1	1	1	0	0	1	1	0	1
1	1	1	1	0	0	1	1	0	1
1	1	1	1	0	0	1	1	0	1
1	1	1	1	0	0	1	1	0	1
1	1	1	1	0	0	1	1	0	1
1	1	1	1	0	0	1	1	0	1
1	1	1	1	0	0	1	1	0	1
1	1	1	1	0	0	1	1	0	1
1	1	1	1	1	0	1	1	0	1
1	1	1	1	1	0	1	1	0	1
1	1	1	1	0	0	1	1	0	1
1	1	1	1	1	0	1	1	0	1
1	1	1	1	0	0	1	1	0	1
1	1	1	1	1	0	1	1	0	1
1	1	1	1	1	0	1	1	0	1
1	1	1	1	1	0	1	1	0	1
1	1	1	1	1	0	1	1	0	1
1	1	1	1	1	0	1	1	0	1
1	1	1	1	1	0	1	1	0	1
1	1	1	1	1	0	1	1	0	1
1	1	1	1	1	0	1	1	0	1
1	1	1	1	1	0	1	1	0	1
1	1	1	1	1	0	1	1	0	1
1	1	1	1	1	0	1	1	0	1
1	1	1	1	1	0	1	1	0	1
1	1	1	1	1	0	1	1	0	1
1	1	1	1	1	0	1	1	0	1
1	1	1	1	1	0	1	1	0	1
1	1	1	1	1	0	1	1	0	1
1	1	1	1	1	0	1	1	0	1
1	1	1	1	1	0	1	1	0	1
1	1	1	1	1	0	1	1	0	1
1	1	1	1	1	0	1	1	0	1
1	1	1	1	1	0	1	1	0	1
1	1	1	1	1	0	1	1	0	1
1	1	1	1	1	0	1	1	0	1
1	1	1	1	1	0	1	1	0	1
1	1	1	1	1	0	1	1	0	1
1	1	1	1	1	0	1	1	0	1
1	1	1	1	1	0	1	1	0	1
1	1	1	1	1	0	1	1	0	1
1	1	1	1	1	0	1	1	0	1
1	1	1	1	1	0	1	1	0	1
1	1	1	1	1	0	1	1	0	1
1	1	1	1	1	0	1	1	0	1
1	1	1	1	1	0	1	1	0	1
1	1	1	1	1	0	1	1	0	1
1	1	1	1	1	0	1	1	0	1
1	1	1	1	1	0	1	1	0	1
1	1	1	1	1	0	1	1	0	1
1	1	1	1	1	0	1	1	0	1
1	1	1	1	1	0	1	1	0	1
1	1	1	1	1	0	1	1	0	1
1	1	1	1	1	0	1	1	0	1
1	1	1	1	1	0	1	1	0	1
1	1	1	1	1	0	1	1	0	1
1	1	1	1	1	0	1	1	0	1
1	1	1	1	1	0	1	1	0	1
1	1	1	1	1	0	1	1	0	1
1	1	1	1	1	0	1	1	0	1
1	1	1	1	1	0	1	1	0	1
1	1	1	1	1	0	1	1	0	1
1	1	1	1	1	0	1	1	0	1
1	1	1	1	1	0	1	1	0	1
1	1	1	1	1	0	1	1	0	1
1	1	1	1	1	0	1	1	0	1
1	1	1	1	1	0	1	1	0	1
1	1	1	1	1	0	1	1	0	1
1	1	1	1	1	0	1	1	0	1
1	1	1	1	1	0	1	1	0	1
1	1	1	1	1	0	1	1	0	1
1	1	1	1	1	0	1	1	0	1
1	1	1	1	1	0	1	1	0	1
1	1	1	1	1	0	1	1	0	1
1	1	1	1	1	0	1	1	0	1
1	1	1	1	1	0	1	1	0	1
1	1	1	1	1	0	1	1	0	1
1	1	1	1	1	0	1	1	0	1
1	1	1	1	1	0	1	1	0	1
1	1	1	1	1	0	1	1	0	1
1	1	1	1	1	0	1	1	0	1
1	1	1	1	1	0	1	1	0	1
1	1	1	1	1	0	1	1	0	1
1	1	1	1	1	0	1	1	0	1
1	1	1	1	1	0	1	1	0	1
1	1	1	1	1	0	1	1	0	1
1	1	1	1	1	0	1	1	0	1
1	1	1	1	1	0	1	1	0	1
1	1	1	1	1	0	1	1	0	1
1	1	1	1	1	0	1	1	0	1
1	1	1	1	1	0	1	1	0	1
1	1	1	1	1	0	1	1	0	1
1	1	1	1	1	0	1	1	0	1
1	1	1	1	1	0	1	1	0	1
1	1	1	1	1	0	1	1	0	1
1	1	1	1	1	0	1	1	0	1
1	1	1	1	1	0	1	1	0	1
1	1	1	1	1	0	1	1	0	1
1	1	1	1	1	0	1	1	0	1
1	1	1	1	1	0	1	1	0	1
1	1	1	1	1	0	1	1	0	1
1	1	1	1	1	0	1	1	0	1
1	1	1	1	1	0	1	1	0	1
1	1	1	1	1	0	1	1	0	1
1	1	1	1	1	0	1	1	0	1
1	1	1	1	1	0	1	1	0	1
1	1	1	1	1	0	1	1	0	1
1	1	1	1	1	0	1	1	0	1
1	1	1	1	1	0	1	1	0	1
1	1	1	1	1	0	1	1	0	1
1	1	1	1	1	0	1	1	0	1
1	1	1	1	1	0	1	1	0	1
1	1	1	1	1	0	1	1	0	1
1	1	1	1	1	0	1	1	0	1
1	1	1	1	1	0	1	1	1	1
1	1	1	1	1	0	1	1	1	1
1	1	1	1	1	0	1	1	1	1
1	1	1	1	1	0	1	1	1	1
1	1	1	1	1	0	1	1	1	1
1	1	1	1	1	0	1	1	1	1
1	1	1	1	1	0	1	1	1	1
1	1	1	1	1	0	1	1	1	1
1	1	1	1	1	0	1	1	1	1
1	1	1	1	1	0	1	1	1	1
1	1	1	1	1	0	1	1	0	1
1	1	1	1	1	0	1	1	0	1
1	1	1	1	1	0	1	1	0	1
1	1	1	1	1	0	1	1	0	1
1	1	1	1	1	0	1	1	0	1
1	1	1	1	1	0	1	1	0	1
1	1	1	1	1	0	1	1	0	1
1	1	1	1	1	0	1	1	0	1
1	1	1	1	1	0	1	1	0	1
1	1	1	1	1	0	1	1	0	1
1	1	1	1	1	0	1	1	0	1
1	1	1	1	1	0	1	1	0	1
1	1	1	1	1	0	1	1	0	1
1	1	1	1	1	0	1	1	0	1
1	1	1	1	1	0	1	1	0	1
1	1	1	1	1	0	1	1	1	1
1	1	1	1	1	0	1	1	0	1
1	1	1	1	1	0	1	1	1	1
1	1	1	1	1	0	1	1	0	1
1	1	1	1	1	0	1	1	1	1
1	1	1	1	1	0	1	1	1	1
1	1	1	1	1	0	1	1	1	1
1	1	1	1	1	0	1	1	1	1
1	1	1	1	1	0	1	1	1	1
1	1	1	1	1	0	1	1	1	1
1	1	1	1	1	0	1	1	1	1
1	1	1	1	1	0	1	1	1	1
1	1	1	1	1	0	1	1	1	1
1	1	1	1	1	0	1	1	1	1
1	1	1	1	1	0	1	1	1	1
1	1	1	1	1	0	1	1	1	1
1	1	1	1	1	0	1	1	1	1
1	1	1	1	1	0	1	1	1	1
1	1	1	1	1	0	1	1	1	1
1	1	1	1	1	0	1	1	1	1
1	1	1	1	1	0	1	1	1	1
1	1	1	1	1	0	1	1	1	1
1	1	1	1	1	0	1	1	1	1
1	1	1	1	1	0	1	1	1	1
1	1	1	1	1	0	1	1	1	1
1	1	1	1	1	1	1	1	1	1
1	1	1	1	1	0	1	1	1	1
1	1	1	1	1	0	1	1	1	1
1	1	1	1	1	0	1	1	1	1
1	1	1	1	1	1	1	1	0	1
1	1	1	1	1	1	1	1	0	1
1	1	1	1	1	1	1	1	0	1
1	1	1	1	1	1	1	1	0	1
1	1	1	1	1	1	1	1	0	1
1	1	1	1	1	1	1	1	0	1
1	1	1	1	1	1	1	1	0	1
1	1	1	1	1	1	1	1	0	1
1	1	1	1	1	1	1	1	0	1
1	1	1	1	1	1	1	1	0	1
1	1	1	1	1	0	1	1	0	1
1	1	1	1	1	0	1	1	0	1
1	1	1	1	1	0	1	1	0	1
1	1	1	1	1	0	1	1	0	1
1	1	1	1	1	0	1	1	0	1
1	1	1	1	1	0	1	1	0	1
1	1	1	1	1	0	1	1	1	1
1	1	1	1	1	0	1	1	1	1
1	1	1	1	1	0	1	1	0	1
1	1	1	1	1	0	1	1	1	1
1	1	1	1	1	1	1	1	1	1
1	1	1	1	1	0	1	1	1	1
1	1	1	1	1	0	1	1	1	1
1	1	1	1	1	0	1	1	1	1
1	1	1	1	1	0	1	1	1	1
1	1	1	1	1	0	1	1	1	1
1	1	1	1	1	0	1	1	1	1
1	1	1	1	1	1	1	1	1	1
1	1	1	1	1	1	1	1	1	1
1	1	1	1	1	1	1	1	1	1
1	1	1	1	1	1	1	1	1	1
1	1	1	1	1	1	1	1	1	1
1	1	1	1	1	1	1	1	1	1
1	1	1	1	1	1	1	1	1	1
1	1	1	1	1	1	1	1	1	1
1	1	1	1	1	1	1	1	1	1
1	1	1	1	1	1	1	1	1	1
1	1	1	1	1	1	1	1	1	1
1	1	1	1	1	1	1	1	1	1
1	1	1	1	1	0	1	1	1	1
1	1	1	1	1	0	1	1	1	1
1	1	1	1	1	0	1	1	1	1
1	1	1	1	1	0	1	1	1	1
1	1	1	1	1	0	1	1	1	1
1	1	1	1	1	0	1	1	1	1
1	1	1	1	1	0	1	1	1	1
1	1	1	1	1	0	1	1	1	1
1	1	1	1	1	0	1	1	1	1
1	1	1	1	1	0	1	1	1	1
1	1	1	1	1	0	1	1	1	1
1	1	1	1	1	0	1	1	1	1
1	1	1	1	1	0	1	1	1	1
1	1	1	1	1	0	1	1	1	1
1	1	1	1	1	1	1	1	1	1
1	1	1	1	1	0	1	1	1	1
1	1	1	1	1	0	1	1	1	1
1	1	1	1	1	1	1	1	1	1
1	1	1	1	1	1	1	1	1	1
1	1	1	1	1	0	1	1	1	1
1	1	1	1	1	1	1	1	1	1
1	1	1	1	1	1	1	1	1	1
1	1	1	1	1	1	1	1	1	1
1	1	1	1	1	1	1	1	1	1
1	1	1	1	1	1	1	1	1	1
1	1	1	1	1	1	1	1	1	1
1	1	1	1	1	1	1	1	1	1
1	1	1	1	1	1	1	1	1	1
1	1	1	1	1	1	1	1	1	1
1	1	1	1	1	1	1	1	1	1
1	1	1	1	1	1	1	1	1	1
1	1	1	1	1	1	1	1	1	1
1	1	1	1	1	1	1	1	1	1
1	1	1	1	1	1	1	1	1	1
1	1	1	1	1	1	1	1	1	1
1	1	1	1	1	1	1	1	1	1
1	1	1	1	1	1	1	1	1	1
1	1	1	1	1	1	1	1	1	1
1	1	1	1	1	1	1	1	1	1
1	1	1	1	1	1	1	1	1	1
1	1	1	1	1	1	1	1	1	1
1	1	1	1	1	1	1	1	1	1
1	1	1	1	1	1	1	1	1	1
1	1	1	1	1	1	1	1	1	1
1	1	1	1	1	1	1	1	1	1
1	1	1	1	1	1	1	1	1	1
1	1	1	1	1	1	1	1	1	1
1	1	1	1	1	1	1	1	1	1
1	1	1	1	1	1	1	1	1	1
1	1	1	1	1	1	1	1	1	1
1	1	1	1	1	1	1	1	1	1
1	1	1	1	1	1	1	1	1	1
1	1	1	1	1	1	1	1	1	1
1	1	1	1	1	1	1	1	1	1
1	1	1	1	1	1	1	1	1	1
1	1	1	1	1	1	1	1	1	1
1	1	1	1	1	1	1	1	1	1
1	1	1	1	1	1	1	1	1	1
1	1	1	1	1	1	1	1	1	1
1	1	1	1	1	1	1	1	1	1
1	1	1	1	1	1	1	1	1	1
1	1	1	1	1	1	1	1	1	1
1	1	1	1	1	1	1	1	1	1
1	1	1	1	1	1	1	1	1	1
1	1	1	1	1	1	1	1	1	1
1	1	1	1	1	1	1	1	1	1
1	1	1	1	1	1	1	1	1	1
1	1	1	1	1	1	1	1	1	1
1	1	1	1	1	1	1	1	1	1
1	1	1	1	1	1	1	1	1	1
1	1	1	1	1	1	1	1	1	1
1	1	1	1	1	1	1	1	1	1
1	1	1	1	1	1	1	1	1	1
1	1	1	1	1	1	1	1	1	1
1	1	1	1	1	1	1	1	1	1
1	1	1	1	1	1	1	1	1	1
1	1	1	1	1	1	1	1	1	1
1	1	1	1	1	1	1	1	1	1
1	1	1	1	1	1	1	1	1	1
1	1	1	1	1	1	1	1	1	1
1	1	1	1	1	1	1	1	1	1
1	1	1	1	1	1	1	1	1	1
1	1	1	1	1	1	1	1	1	1
1	1	1	1	1	1	1	1	1	1
1	1	1	1	1	1	1	1	1	1
1	1	1	1	1	1	1	1	1	1
1	1	1	1	1	1	1	1	1	1
1	1	1	1	1	1	1	1	1	1
1	1	1	1	1	1	1	1	1	1
1	1	1	1	1	1	1	1	1	1
1	1	1	1	1	1	1	1	1	1
1	1	1	1	1	1	1	1	1	1
1	1	1	1	1	1	1	1	1	1
1	1	1	1	1	1	1	1	1	1
1	1	1	1	1	1	1	1	1	1
1	1	1	1	1	1	1	1	1	1
1	1	1	1	1	1	1	1	1	1
1	1	1	1	1	1	1	1	1	1
1	1	1	1	1	1	1	1	1	1
1	1	1	1	1	1	1	1	1	1
1	1	1	1	1	1	1	1	1	1
1	1	1	1	1	1	1	1	1	1
1	1	1	1	1	1	1	1	1	1
1	1	1	1	1	1	1	1	1	1
1	1	1	1	1	1	1	1	1	1
1	1	1	1	1	1	1	1	1	1
1	1	1	1	1	1	1	1	1	1
1	1	1	1	1	1	1	1	1	1
1	1	1	1	1	1	1	1	1	1
1	1	1	1	1	1	1	1	1	1
1	1	1	1	1	1	1	1	1	1
1	1	1	1	1	1	1	1	1	1
1	1	1	1	1	1	1	1	1	1
1	1	1	1	1	1	1	1	1	1
1	1	1	1	1	1	1	1	1	1
1	1	1	1	1	1	1	1	1	1
1	1	1	1	1	1	1	1	1	1
1	1	1	1	1	1	1	1	1	1
1	1	1	1	1	1	1	1	1	1
1	1	1	1	1	1	1	1	1	1
1	1	1	1	1	1	1	1	1	1
1	1	1	1	1	1	1	1	1	1
1	1	1	1	1	1	1	1	1	1
1	1	1	1	1	1	1	1	1	1
1	1	1	1	1	1	1	1	1	1
1	1	1	1	1	1	1	1	1	1
1	1	1	1	1	1	1	1	1	1
1	1	1	1	1	1	1	1	1	1
1	1	1	1	1	1	1	1	1	1
1	1	1	1	1	1	1	1	1	1
1	1	1	1	1	1	1	1	1	1
1	1	1	1	1	1	1	1	1	1
1	1	1	1	1	1	1	1	1	1
1	1	1	1	1	1	1	1	1	1
1	1	1	1	1	1	1	1	1	1
1	1	1	1	1	1	1	1	1	1
1	1	1	1	1	1	1	1	1	1
1	1	1	1	1	1	1	1	1	1
1	1	1	1	1	1	1	1	1	1
1	1	1	1	1	1	1	1	1	1
1	1	1	1	1	1	1	1	1	1
1	1	1	1	1	1	1	1	1	1
1	1	1	1	1	1	1	1	1	1
1	1	1	1	1	1	1	1	1	1
1	1	1	1	1	1	1	1	1	1
1	1	1	1	1	1	1	1	1	1
1	1	1	1	1	1	1	1	1	1
1	1	1	1	1	1	1	1	1	1
1	1	1	1	1	1	1	1	1	1
1	1	1	1	1	1	1	1	1	1
1	1	1	1	1	1	1	1	1	1
1	1	1	1	1	1	1	1	1	1
1	1	1	1	1	1	1	1	1	1
1	1	1	1	1	1	1	1	1	1
1	1	1	1	1	1	1	1	1	1
1	1	1	1	1	1	1	1	1	1
1	1	1	1	1	1	1	1	1	1
1	1	1	1	1	1	1	1	1	1
1	1	1	1	1	1	1	1	1	1
1	1	1	1	1	1	1	1	1	1
1	1	1	1	1	1	1	1	1	1
1	1	1	1	1	1	1	1	1	1
1	1	1	1	1	1	1	1	1	1
1	1	1	1	1	1	1	1	1	1
1	1	1	1	1	1	1	1	1	1
1	1	1	1	1	1	1	1	1	1
1	1	1	1	1	1	1	1	1	1
1	1	1	1	1	1	1	1	1	1
1	1	1	1	1	1	1	1	1	1
1	1	1	1	1	1	1	1	1	1
1	1	1	1	1	1	1	1	1	1
1	1	1	1	1	1	1	1	1	1
1	1	1	1	1	1	1	1	1	1
1	1	1	1	1	1	1	1	1	1
1	1	1	1	1	1	1	1	1	1
1	1	1	1	1	1	1	1	1	1
1	1	1	1	1	1	1	1	1	1
1	1	1	1	1	1	1	1	1	1
1	1	1	1	1	1	1	1	1	1
1	1	1	1	1	1	1	1	1	1
1	1	1	1	1	1	1	1	1	1
1	1	1	1	1	1	1	1	1	1
1	1	1	1	1	1	1	1	1	1
1	1	1	1	1	1	1	1	1	1
1	1	1	1	1	1	1	1	1	1
1	1	1	1	1	1	1	1	1	1
1	1	1	1	1	1	1	1	1	1
1	1	1	1	1	1	1	1	1	1
1	1	1	1	1	1	1	1	1	1
1	1	1	1	1	1	1	1	1	1
1	1	1	1	1	1	1	1	1	1
1	1	1	1	1	1	1	1	1	1
1	1	1	1	1	1	1	1	1	1
1	1	1	1	1	1	1	1	1	1
1	1	1	1	1	1	1	1	1	1
1	1	1	1	1	1	1	1	1	1
1	1	1	1	1	1	1	1	1	1
1	1	1	1	1	1	1	1	1	1
1	1	1	1	1	1	1	1	1	1
1	1	1	1	1	1	1	1	1	1
1	1	1	1	1	1	1	1	1	1
1	1	1	1	1	1	1	1	1	1
1	1	1	1	1	1	1	1	1	1
1	1	1	1	1	1	1	1	1	1
1	1	1	1	1	1	1	1	1	1
1	1	1	1	1	1	1	1	1	1
1	1	1	1	1	1	1	1	1	1
1	1	1	1	1	1	1	1	1	1
1	1	1	1	1	1	1	1	1	1
1	1	1	1	1	1	1	1	1	1
1	1	1	1	1	1	1	1	1	1
1	1	1	1	1	1	1	1	1	1
1	1	1	1	1	1	1	1	1	1
1	1	1	1	1	1	1	1	1	1
1	1	1	1	1	1	1	1	1	1
1	1	1	1	1	1	1	1	1	1
1	1	1	1	1	1	1	1	1	1
1	1	1	1	1	1	1	1	1	1
1	1	1	1	1	1	1	1	1	1
1	1	1	1	1	1	1	1	1	1
1	1	1	1	1	1	1	1	1	1
1	1	1	1	1	1	1	1	1	1
1	1	1	1	1	1	1	1	1	1
1	1	1	1	1	1	1	1	1	1
1	1	1	1	1	1	1	1	1	1
1	1	1	1	1	1	1	1	1	1
1	1	1	1	1	1	1	1	1	1
1	1	1	1	1	1	1	1	1	1
1	1	1	1	1	1	1	1	1	1
1	1	1	1	1	1	1	1	1	1
1	1	1	1	1	1	1	1	1	1
1	1	1	1	1	1	1	1	1	1
1	1	1	1	1	1	1	1	1	1
1	1	1	1	1	1	1	1	1	1
1	1	1	1	1	1	1	1	1	1
1	1	1	1	1	1	1	1	1	1
1	1	1	1	1	1	1	1	1	1
1	1	1	1	1	1	1	1	1	1
1	1	1	1	1	1	1	1	1	1
1	1	1	1	1	1	1	1	1	1
1	1	1	1	1	1	1	1	1	1
1	1	1	1	1	1	1	1	1	1
1	1	1	1	1	1	1	1	1	1
1	1	1	1	1	1	1	1	1	1
1	1	1	1	1	1	1	1	1	1
1	1	1	1	1	1	1	1	1	1
1	1	1	1	1	1	1	1	1	1
1	1	1	1	1	1	1	1	1	1
1	1	1	1	1	1	1	1	1	1
1	1	1	1	1	1	1	1	1	1
1	1	1	1	1	1	1	1	1	1
1	1	1	1	1	1	1	1	1	1
1	1	1	1	1	1	1	1	1	1
1	1	1	1	1	1	1	1	1	1
1	1	1	1	1	1	1	1	1	1
1	1	1	1	1	1	1	1	1	1
1	1	1	1	1	1	1	1	1	1
1	1	1	1	1	1	1	1	1	1
1	1	1	1	1	1	1	1	1	1
1	1	1	1	1	1	1	1	1	1
1	1	1	1	1	1	1	1	1	1
1	1	1	1	1	1	1	1	1	1
1	1	1	1	1	1	1	1	1	1
1	1	1	1	1	1	1	1	1	1
1	1	1	1	1	1	1	1	1	1
1	1	1	1	1	1	1	1	1	1
1	1	1	1	1	1	1	1	1	1
1	1	1	1	1	1	1	1	1	1
1	1	1	1	1	1	1	1	1	1
1	1	1	1	1	1	1	1	1	1
1	1	1	1	1	1	1	1	1	1
1	1	1	1	1	1	1	1	1	1
1	1	1	1	1	1	1	1	1	1
1	1	1	1	1	1	1	1	1	1
1	1	1	1	1	1	1	1	1	1
1	1	1	1	1	1	1	1	1	1
1	1	1	1	1	1	1	1	1	1
1	1	1	1	1	1	1	1	1	1
1	1	1	1	1	1	1	1	1	1
1	1	1	1	1	1	1	1	1	1
1	1	1	1	1	1	1	1	1	1
1	1	1	1	1	1	1	1	1	1
1	1	1	1	1	1	1	1	1	1
1	1	1	1	1	1	1	1	1	1
1	1	1	1	1	1	1	1	1	1
1	1	1	1	1	1	1	1	1	1
1	1	1	1	1	1	1	1	1	1
1	1	1	1	1	1	1	1	1	1
1	1	1	1	1	1	1	1	1	1
1	1	1	1	1	1	1	1	1	1
1	1	1	1	1	1	1	1	1	1
1	1	1	1	1	1	1	1	1	1
1	1	1	1	1	1	1	1	1	1
1	1	1	1	1	1	1	1	1	1
1	1	1	1	1	1	1	1	1	1
1	1	1	1	1	1	1	1	1	1
1	1	1	1	1	1	1	1	1	1
1	1	1	1	1	1	1	1	1	1
1	1	1	1	1	1	1	1	1	1
1	1	1	1	1	1	1	1	1	1
1	1	1	1	1	1	1	1	1	1
1	1	1	1	1	1	1	1	1	1
1	1	1	1	1	1	1	1	1	1
1	1	1	1	1	1	1	1	1	1
1	1	1	1	1	1	1	1	1	1
1	1	1	1	1	1	1	1	1	1
1	1	1	1	1	1	1	1	1	1
1	1	1	1	1	1	1	1	1	1
1	1	1	1	1	1	1	1	1	1
1	1	1	1	1	1	1	1	1	1
1	1	1	1	1	1	1	1	1	1
1	1	1	1	1	1	1	1	1	1
1	1	1	1	1	1	1	1	1	1
1	1	1	1	1	1	1	1	1	1
1	1	1	1	1	1	1	1	1	1
1	1	1	1	1	1	1	1	1	1
1	1	1	1	1	1	1	1	1	1
1	1	1	1	1	1	1	1	1	1
1	1	1	1	1	1	1	1	1	1
1	1	1	1	1	1	1	1	1	1
1	1	1	1	1	1	1	1	1	1
1	1	1	1	1	1	1	1	1	1
1	1	1	1	1	1	1	1	1	1
1	1	1	1	1	1	1	1	1	1
1	1	1	1	1	1	1	1	1	1
1	1	1	1	1	1	1	1	1	1
1	1	1	1	1	1	1	1	1	1
1	1	1	1	1	1	1	1	1	1
1	1	1	1	1	1	1	1	1	1
1	1	1	1	1	1	1	1	1	1
1	1	1	1	1	1	1	1	1	1
1	1	1	1	1	1	1	1	1	1
1	1	1	1	1	1	1	1	1	1
1	1	1	1	1	1	1	1	1	1
1	1	1	1	1	1	1	1	1	1
1	1	1	1	1	1	1	1	1	1
1	1	1	1	1	1	1	1	1	1
1	1	1	1	1	1	1	1	1	1
1	1	1	1	1	1	1	1	1	1
1	1	1	1	1	1	1	1	1	1
1	1	1	1	1	1	1	1	1	1
1	1	1	1	1	1	1	1	1	1
1	1	1	1	1	1	1	1	1	1
1	1	1	1	1	1	1	1	1	1
1	1	1	1	1	1	1	1	1	1
1	1	1	1	1	1	1	1	1	1
1	1	1	1	1	1	1	1	1	1
1	1	1	1	1	1	1	1	1	1
1	1	1	1	1	1	1	1	1	1
1	1	1	1	1	1	1	1	1	1
1	1	1	1	1	1	1	1	1	1
1	1	1	1	1	1	1	1	1	1
1	1	1	1	1	1	1	1	1	1
1	1	1	1	1	1	1	1	1	1
1	1	1	1	1	1	1	1	1	1
1	1	1	1	1	1	1	1	1	1
1	1	1	1	1	1	1	1	1	1
1	1	1	1	1	1	1	1	1	1
1	1	1	1	1	1	1	1	1	1
1	1	1	1	1	1	1	1	1	1
1	1	1	1	1	1	1	1	1	1
1	1	1	1	1	1	1	1	1	1
1	1	1	1	1	1	1	1	1	1
1	1	1	1	1	1	1	1	1	1
1	1	1	1	1	1	1	1	1	1
1	1	1	1	1	1	1	1	1	1
1	1	1	1	1	1	1	1	1	1
1	1	1	1	1	1	1	1	1	1
1	1	1	1	1	1	1	1	1	1
1	1	1	1	1	1	1	1	1	1
1	1	1	1	1	1	1	1	1	1
1	1	1	1	1	1	1	1	1	1
1	1	1	1	1	1	1	1	1	1
1	1	1	1	1	1	1	1	1	1
1	1	1	1	1	1	1	1	1	1
1	1	1	1	1	1	1	1	1	1
1	1	1	1	1	1	1	1	1	1
1	1	1	1	1	1	1	1	1	1
1	1	1	1	1	1	1	1	1	1
1	1	1	1	1	1	1	1	1	1
1	1	1	1	1	1	1	1	1	1
1	1	1	1	1	1	1	1	1	1
1	1	1	1	1	1	1	1	1	1
1	1	1	1	1	1	1	1	1	1
1	1	1	1	1	1	1	1	1	1
1	1	1	1	1	1	1	1	1	1
1	1	1	1	1	1	1	1	1	1
1	1	1	1	1	1	1	1	1	1
1	1	1	1	1	1	1	1	1	1
1	1	1	1	1	1	1	1	1	1
1	1	1	1	1	1	1	1	1	1
1	1	1	1	1	1	1	1	1	1
1	1	1	1	1	1	1	1	1	1
1	1	1	1	1	1	1	1	1	1
1	1	1	1	1	1	1	1	1	1
1	1	1	1	1	1	1	1	1	1
1	1	1	1	1	1	1	1	1	1
1	1	1	1	1	1	1	1	1	1
1	1	1	1	1	1	1	1	1	1
1	1	1	1	1	1	1	1	1	1
1	1	1	1	1	1	1	1	1	1
1	1	1	1	1	1	1	1	1	1
1	1	1	1	1	1	1	1	1	1
1	1	1	1	1	1	1	1	1	1
1	1	1	1	1	1	1	1	1	1
1	1	1	1	1	1	1	1	1	1
1	1	1	1	1	1	1	1	1	1
1	1	1	1	1	1	1	1	1	1
1	1	1	1	1	1	1	1	1	1
1	1	1	1	1	1	1	1	1	1
1	1	1	1	1	1	1	1	1	1
1	1	1	1	1	1	1	1	1	1
1	1	1	1	1	1	1	1	1	1
1	1	1	1	1	1	1	1	1	1
1	1	1	1	1	1	1	1	1	1
1	1	1	1	1	1	1	1	1	1
1	1	1	1	1	1	1	1	1	1
1	1	1	1	1	1	1	1	1	1
1	1	1	1	1	1	1	1	1	1
1	1	1	1	1	1	1	1	1	1
1	1	1	1	1	1	1	1	1	1
1	1	1	1	1	1	1	1	1	1
1	1	1	1	1	1	1	1	1	1
1	1	1	1	1	1	1	1	1	1
1	1	1	1	1	1	1	1	1	1
1	1	1	1	1	1	1	1	1	1
1	1	1	1	1	1	1	1	1	1
1	1	1	1	1	1	1	1	1	1
1	1	1	1	1	1	1	1	1	1
1	1	1	1	1	1	1	1	1	1
1	1	1	1	1	1	1	1	1	1
1	1	1	1	1	1	1	1	1	1
1	1	1	1	1	1	1	1	1	1
1	1	1	1	1	1	1	1	1	1
1	1	1	1	1	1	1	1	1	1
1	1	1	1	1	1	1	1	1	1
1	1	1	1	1	1	1	1	1	1
1	1	1	1	1	1	1	1	1	1
1	1	1	1	1	1	1	1	1	1
1	1	1	1	1	1	1	1	1	1
1	1	1	1	1	1	1	1	1	1
1	1	1	1	1	1	1	1	1	1
1	1	1	1	1	1	1	1	1	1
1	1	1	1	1	1	1	1	1	1
1	1	1	1	1	1	1	1	1	1
1	1	1	1	1	1	1	1	1	1
1	1	1	1	1	1	1	1	1	1
1	1	1	1	1	1	1	1	1	1
1	1	1	1	1	1	1	1	1	1
1	1	1	1	1	1	1	1	1	1
1	1	1	1	1	1	1	1	1	1
1	1	1	1	1	1	1	1	1	1
1	1	1	1	1	1	1	1	1	1
1	1	1	1	1	1	1	1	1	1
1	1	1	1	1	1	1	1	1	1
1	1	1	1	1	1	1	1	1	1
1	1	1	1	1	1	1	1	1	1
1	1	1	1	1	1	1	1	1	1
1	1	1	1	1	1	1	1	1	1
1	1	1	1	1	1	1	1	1	1
1	1	1	1	1	1	1	1	1	1
1	1	1	1	1	1	1	1	1	1
1	1	1	1	1	1	1	1	1	1
1	1	1	1	1	1	1	1	1	1
1	1	1	1	1	1	1	1	1	1
1	1	1	1	1	1	1	1	1	1
1	1	1	1	1	1	1	1	1	1
1	1	1	1	1	1	1	1	1	1
1	1	1	1	1	1	1	1	1	1
1	1	1	1	1	1	1	1	1	1
1	1	1	1	1	1	1	1	1	1
1	1	1	1	1	1	1	1	1	1
1	1	1	1	1	1	1	1	1	1
1	1	1	1	1	1	1	1	1	1
1	1	1	1	1	1	1	1	1	1
1	1	1	1	1	1	1	1	1	1
1	1	1	1	1	1	1	1	1	1
1	1	1	1	1	1	1	1	1	1
1	1	1	1	1	1	1	1	1	1
1	1	1	1	1	1	1	1	1	1
1	1	1	1	1	1	1	1	1	1
1	1	1	1	1	1	1	1	1	1
1	1	1	1	1	1	1	1	1	1
1	1	1	1	1	1	1	1	1	1
1	1	1	1	1	1	1	1	1	1
1	1	1	1	1	1	1	1	1	1
1	1	1	1	1	1	1	1	1	1
1	1	1	1	1	1	1	1	1	1
1	1	1	1	1	1	1	1	1	1
1	1	1	1	1	1	1	1	1	1
1	1	1	1	1	1	1	1	1	1
1	1	1	1	1	1	1	1	1	1
1	1	1	1	1	1	1	1	1	1
1	1	1	1	1	1	1	1	1	1
1	1	1	1	1	1	1	1	1	1
1	1	1	1	1	1	1	1	1	1
1	1	1	1	1	1	1	1	1	1
1	1	1	1	1	1	1	1	1	1
1	1	1	1	1	1	1	1	1	1
1	1	1	1	1	1	1	1	1	1
1	1	1	1	1	1	1	1	1	1
1	1	1	1	1	1	1	1	1	1
1	1	1	1	1	1	1	1	1	1
1	1	1	1	1	1	1	1	1	1
1	1	1	1	1	1	1	1	1	1
1	1	1	1	1	1	1	1	1	1
1	1	1	1	1	1	1	1	1	1
1	1	1	1	1	1	1	1	1	1
1	1	1	1	1	1	1	1	1	1
1	1	1	1	1	1	1	1	1	1
1	1	1	1	1	1	1	1	1	1
1	1	1	1	1	1	1	1	1	1
1	1	1	1	1	1	1	1	1	1
1	1	1	1	1	1	1	1	1	1
1	1	1	1	1	1	1	1	1	1
1	1	1	1	1	1	1	1	1	1
1	1	1	1	1	1	1	1	1	1
1	1	1	1	1	1	1	1	1	1
1	1	1	1	1	1	1	1	1	1
1	1	1	1	1	1	1	1	1	1
1	1	1	1	1	1	1	1	1	1
1	1	1	1	1	1	1	1	1	1
1	1	1	1	1	1	1	1	1	1
1	1	1	1	1	1	1	1	1	1
1	1	1	1	1	1	1	1	1	1
1	1	1	1	1	1	1	1	1	1
1	1	1	1	1	1	1	1	1	1
1	1	1	1	1	1	1	1	1	1
1	1	1	1	1	1	1	1	1	1
1	1	1	1	1	1	1	1	1	1
1	1	1	1	1	1	1	1	1	1
1	1	1	1	1	1	1	1	1	1
1	1	1	1	1	1	1	1	1	1
1	1	1	1	1	1	1	1	1	1
1	1	1	1	1	1	1	1	1	1
1	1	1	1	1	1	1	1	1	1
1	1	1	1	1	1	1	1	1	1
1	1	1	1	1	1	1	1	1	1
1	1	1	1	1	1	1	1	1	1
1	1	1	1	1	1	1	1	1	1
1	1	1	1	1	1	1	1	1	1
1	1	1	1	1	1	1	1	1	1
1	1	1	1	1	1	1	1	1	1
1	1	1	1	1	1	1	1	1	1
1	1	1	1	1	1	1	1	1	1
1	1	1	1	1	1	1	1	1	1
1	1	1	1	1	1	1	1	1	1
1	1	1	1	1	1	1	1	1	1
1	1	1	1	1	1	1	1	1	1
1	1	1	1	1	1	1	1	1	1
1	1	1	1	1	1	1	1	1	1
1	1	1	1	1	1	1	1	1	1
1	1	1	1	1	1	1	1	1	1
1	1	1	1	1	1	1	1	1	1
1	1	1	1	1	1	1	1	1	1
1	1	1	1	1	1	1	1	1	1
1	1	1	1	1	1	1	1	1	1
1	1	1	1	1	1	1	1	1	1
1	1	1	1	1	1	1	1	1	1
1	1	1	1	1	1	1	1	1	1
1	1	1	1	1	1	1	1	1	1
1	1	1	1	1	1	1	1	1	1
1	1	1	1	1	1	1	1	1	1
1	1	1	1	1	1	1	1	1	1
1	1	1	1	1	1	1	1	1	1
1	1	1	1	1	1	1	1	1	1
1	1	1	1	1	1	1	1	1	1
1	1	1	1	1	1	1	1	1	1
1	1	1	1	1	1	1	1	1	1
1	1	1	1	1	1	1	1	1	1
1	1	1	1	1	1	1	1	1	1
1	1	1	1	1	1	1	1	1	1
1	1	1	1	1	1	1	1	1	1
1	1	1	1	1	1	1	1	1	1
1	1	1	1	1	1	1	1	1	1
1	1	1	1	1	1	1	1	1	1
1	1	1	1	1	1	1	1	1	1
1	1	1	1	1	1	1	1	1	1
1	1	1	1	1	1	1	1	1	1
1	1	1	1	1	1	1	1	1	1
1	1	1	1	1	1	1	1	1	1
1	1	1	1	1	1	1	1	1	1
1	1	1	1	1	1	1	1	1	1
1	1	1	1	1	1	1	1	1	1
1	1	1	1	1	1	1	1	1	1
1	1	1	1	1	1	1	1	1	1
1	1	1	1	1	1	1	1	1	1
1	1	1	1	1	1	1	1	1	1
1	1	1	1	1	1	1	1	1	1
1	1	1	1	1	1	1	1	1	1
1	1	1	1	1	1	1	1	1	1
1	1	1	1	1	1	1	1	1	1
1	1	1	1	1	1	1	1	1	1
1	1	1	1	1	1	1	1	1	1
1	1	1	1	1	1	1	1	1	1
1	1	1	1	1	1	1	1	1	1
1	1	1	1	1	1	1	1	1	1
1	1	1	1	1	1	1	1	1	1
1	1	1	1	1	1	1	1	1	1
1	1	1	1	1	1	1	1	1	1
1	1	1	1	1	1	1	1	1	1
1	1	1	1	1	1	1	1	1	1
1	1	1	1	1	1	1	1	1	1
1	1	1	1	1	1	1	1	1	1
1	1	1	1	1	1	1	1	1	1
1	1	1	1	1	1	1	1	1	1
1	1	1	1	1	1	1	1	1	1
1	1	1	1	1	1	1	1	1	1
1	1	1	1	1	1	1	1	1	1
1	1	1	1	1	1	1	1	1	1
1	1	1	1	1	1	1	1	1	1
1	1	1	1	1	1	1	1	1	1
1	1	1	1	1	1	1	1	1	1
1	1	1	1	1	1	1	1	1	1
1	1	1	1	1	1	1	1	1	1
1	1	1	1	1	1	1	1	1	1
1	1	1	1	1	1	1	1	1	1
1	1	1	1	1	1	1	1	1	1
1	1	1	1	1	1	1	1	1	1
1	1	1	1	1	1	1	1	1	1
1	1	1	1	1	1	1	1	1	1
1	1	1	1	1	1	1	1	1	1
1	1	1	1	1	1	1	1	1	1
1	1	1	1	1	1	1	1	1	1
1	1	1	1	1	1	1	1	1	1
1	1	1	1	1	1	1	1	1	1
1	1	1	1	1	1	1	1	1	1
1	1	1	1	1	1	1	1	1	1
1	1	1	1	1	1	1	1	1	1
1	1	1	1	1	1	1	1	1	1
1	1	1	1	1	1	1	1	1	1
1	1	1	1	1	1	1	1	1	1
1	1	1	1	1	1	1	1	1	1
1	1	1	1	1	1	1	1	1	1
1	1	1	1	1	1	1	1	1	1
1	1	1	1	1	1	1	1	1	1
1	1	1	1	1	1	1	1	1	1
1	1	1	1	1	1	1	1	1	1
1	1	1	1	1	1	1	1	1	1
1	1	1	1	1	1	1	1	1	1
1	1	1	1	1	1	1	1	1	1
1	1	1	1	1	1	1	1	1	1
1	1	1	1	1	1	1	1	1	1
1	1	1	1	1	1	1	1	1	1
1	1	1	1	1	1	1	1	1	1
1	1	1	1	1	1	1	1	1	1
1	1	1	1	1	1	1	1	1	1
1	1	1	1	1	1	1	1	1	1
1	1	1	1	1	1	1	1	1	1
1	1	1	1	1	1	1	1	1	1
1	1	1	1	1	1	1	1	1	1
1	1	1	1	1	1	1	1	1	1
1	1	1	1	1	1	1	1	1	1
1	1	1	1	1	1	1	1	1	1
1	1	1	1	1	1	1	1	1	1
1	1	1	1	1	1	1	1	1	1
1	1	1	1	1	1	1	1	1	1
1	1	1	1	1	1	1	1	1	1
1	1	1	1	1	1	1	1	1	1
1	1	1	1	1	1	1	1	1	1
1	1	1	1	1	1	1	1	1	1
1	1	1	1	1	1	1	1	1	1
1	1	1	1	1	1	1	1	1	1
1	1	1	1	1	1	1	1	1	1
1	1	1	1	1	1	1	1	1	1
1	1	1	1	1	1	1	1	1	1
1	1	1	1	1	1	1	1	1	1
1	1	1	1	1	1	1	1	1	1
1	1	1	1	1	1	1	1	1	1
1	1	1	1	1	1	1	1	1	1
1	1	1	1	1	1	1	1	1	1
1	1	1	1	1	1	1	1	1	1
1	1	1	1	1	1	1	1	1	1
1	1	1	1	1	1	1	1	1	1
1	1	1	1	1	1	1	1	1	1
1	1	1	1	1	1	1	1	1	1
1	1	1	1	1	1	1	1	1	1
1	1	1	1	1	1	1	1	1	1
1	1	1	1	1	1	1	1	1	1
1	1	1	1	1	1	1	1	1	1
1	1	1	1	1	1	1	1	1	1
1	1	1	1	1	1	1	1	1	1
1	1	1	1	1	1	1	1	1	1
1	1	1	1	1	1	1	1	1	1
1	1	1	1	1	1	1	1	1	1
1	1	1	1	1	1	1	1	1	1
1	1	1	1	1	1	1	1	1	1
1	1	1	1	1	1	1	1	1	1
1	1	1	1	1	1	1	1	1	1
1	1	1	1	1	1	1	1	1	1
1	1	1	1	1	1	1	1	1	1
1	1	1	1	1	1	1	1	1	1
1	1	1	1	1	1	1	1	1	1
1	1	1	1	1	1	1	1	1	1
1	1	1	1	1	1	1	1	1	1
1	1	1	1	1	1	1	1	1	1
1	1	1	1	1	1	1	1	1	1
1	1	1	1	1	1	1	1	1	1
1	1	1	1	1	1	1	1	1	1
1	1	1	1	1	1	1	1	1	1
1	1	1	1	1	1	1	1	1	1
1	1	1	1	1	1	1	1	1	1
1	1	1	1	1	1	1	1	1	1
1	1	1	1	1	1	1	1	1	1
1	1	1	1	1	1	1	1	1	1
1	1	1	1	1	1	1	1	1	1
1	1	1	1	1	1	1	1	1	1
1	1	1	1	1	1	1	1	1	1
1	1	1	1	1	1	1	1	1	1
1	1	1	1	1	1	1	1	1	1
1	1	1	1	1	1	1	1	1	1
1	1	1	1	1	1	1	1	1	1
1	1	1	1	1	1	1	1	1	1
1	1	1	1	1	1	1	1	1	1
1	1	1	1	1	1	1	1	1	1
1	1	1	1	1	1	1	1	1	1
1	1	1	1	1	1	1	1	1	1
1	1	1	1	1	1	1	1	1	1
1	1	1	1	1	1	1	1	1	1
1	1	1	1	1	1	1	1	1	1
1	1	1	1	1	1	1	1	1	1
1	1	1	1	1	1	1	1	1	1
1	1	1	1	1	1	1	1	1	1
1	1	1	1	1	1	1	1	1	1
1	1	1	1	1	1	1	1	1	1
1	1	1	1	1	1	1	1	1	1
1	1	1	1	1	1	1	1	1	1
1	1	1	1	1	1	1	1	1	1
1	1	1	1	1	1	1	1	1	1
1	1	1	1	1	1	1	1	1	1
1	1	1	1	1	1	1	1	1	1
1	1	1	1	1	1	1	1	1	1
1	1	1	1	1	1	1	1	1	1
1	1	1	1	1	1	1	1	1	1
1	1	1	1	1	1	1	1	1	1
1	1	1	1	1	1	1	1	1	1
1	1	1	1	1	1	1	1	1	1
1	1	1	1	1	1	1	1	1	1
1	1	1	1	1	1	1	1	1	1
1	1	1	1	1	1	1	1	1	1
1	1	1	1	1	1	1	1	1	1
1	1	1	1	1	1	1	1	1	1
1	1	1	1	1	1	1	1	1	1
1	1	1	1	1	1	1	1	1	1
1	1	1	1	1	1	1	1	1	1
1	1	1	1	1	1	1	1	1	1
1	1	1	1	1	1	1	1	1	1
1	1	1	1	1	1	1	1	1	1
1	1	1	1	1	1	1	1	1	1
1	1	1	1	1	1	1	1	1	1
1	1	1	1	1	1	1	1	1	1
1	1	1	1	1	1	1	1	1	1
1	1	1	1	1	1	1	1	1	1
1	1	1	1	1	1	1	1	1	1
1	1	1	1	1	1	1	1	1	1
1	1	1	1	1	1	1	1	1	1
1	1	1	1	1	1	1	1	1	1
1	1	1	1	1	1	1	1	1	1
1	1	1	1	1	1	1	1	1	1
1	1	1	1	1	1	1	1	1	1
1	1	1	1	1	1	1	1	1	1
1	1	1	1	1	1	1	1	1	1
1	1	1	1	1	1	1	1	1	1
1	1	1	1	1	1	1	1	1	1
1	1	1	1	1	1	1	1	1	1
1	1	1	1	1	1	1	1	1	1
1	1	1	1	1	1	1	1	1	1
1	1	1	1	1	1	1	1	1	1
1	1	1	1	1	1	1	1	1	1
1	1	1	1	1	1	1	1	1	1
1	1	1	1	1	1	1	1	1	1
1	1	1	1	1	1	1	1	1	1
1	1	1	1	1	1	1	1	1	1
1	1	1	1	1	1	1	1	1	1
1	1	1	1	1	1	1	1	1	1
1	1	1	1	1	1	1	1	1	1
1	1	1	1	1	1	1	1	1	1
1	1	1	1	1	1	1	1	1	1
1	1	1	1	1	1	1	1	1	1
1	1	1	1	1	1	1	1	1	1
1	1	1	1	1	1	1	1	1	1
1	1	1	1	1	1	1	1	1	1
1	1	1	1	1	1	1	1	1	1
1	1	1	1	1	1	1	1	1	1
1	1	1	1	1	1	1	1	1	1
1	1	1	1	1	1	1	1	1	1
1	1	1	1	1	1	1	1	1	1
1	1	1	1	1	1	1	1	1	1
1	1	1	1	1	1	1	1	1	1
1	1	1	1	1	1	1	1	1	1
1	1	1	1	1	1	1	1	1	1
1	1	1	1	1	1	1	1	1	1
1	1	1	1	1	1	1	1	1	1
1	1	1	1	1	1	1	1	1	1
1	1	1	1	1	1	1	1	1	1
1	1	1	1	1	1	1	1	1	1
1	1	1	1	1	1	1	1	1	1
1	1	1	1	1	1	1	1	1	1
1	1	1	1	1	1	1	1	1	1
1	1	1	1	1	1	1	1	1	1
1	1	1	1	1	1	1	1	1	1
1	1	1	1	1	1	1	1	1	1
1	1	1	1	1	1	1	1	1	1
1	1	1	1	1	1	1	1	1	1
1	1	1	1	1	1	1	1	1	1
1	1	1	1	1	1	1	1	1	1
1	1	1	1	1	1	1	1	1	1
1	1	1	1	1	1	1	1	1	1
1	1	1	1	1	1	1	1	1	1
1	1	1	1	1	1	1	1	1	1
1	1	1	1	1	1	1	1	1	1
1	1	1	1	1	1	1	1	1	1
1	1	1	1	1	1	1	1	1	1
1	1	1	1	1	1	1	1	1	1
1	1	1	1	1	1	1	1	1	1
1	1	1	1	1	1	1	1	1	1
1	1	1	1	1	1	1	1	1	1
1	1	1	1	1	1	1	1	1	1
1	1	1	1	1	1	1	1	1	1
1	1	1	1	1	1	1	1	1	1
1	1	1	1	1	1	1	1	1	1
1	1	1	1	1	1	1	1	1	1
1	1	1	1	1	1	1	1	1	1
1	1	1	1	1	1	1	1	1	1
1	1	1	1	1	1	1	1	1	1
1	1	1	1	1	1	1	1	1	1
1	1	1	1	1	1	1	1	1	1
1	1	1	1	1	1	1	1	1	1
1	1	1	1	1	1	1	1	1	1
1	1	1	1	1	1	1	1	1	1
1	1	1	1	1	1	1	1	1	1
1	1	1	1	1	1	1	1	1	1
1	1	1	1	1	1	1	1	1	1
1	1	1	1	1	1	1	1	1	1
1	1	1	1	1	1	1	1	1	1
1	1	1	1	1	1	1	1	1	1
1	1	1	1	1	1	1	1	1	1
1	1	1	1	1	1	1	1	1	1
1	1	1	1	1	1	1	1	1	1
1	1	1	1	1	1	1	1	1	1
1	1	1	1	1	1	1	1	1	1
1	1	1	1	1	1	1	1	1	1
1	1	1	1	1	1	1	1	1	1
1	1	1	1	1	1	1	1	1	1
1	1	1	1	1	1	1	1	1	1
1	1	1	1	1	1	1	1	1	1
1	1	1	1	1	1	1	1	1	1
1	1	1	1	1	1	1	1	1	1
1	1	1	1	1	1	1	1	1	1
1	1	1	1	1	1	1	1	1	1
1	1	1	1	1	1	1	1	1	1
1	1	1	1	1	1	1	1	1	1
1	1	1	1	1	1	1	1	1	1
1	1	1	1	1	1	1	1	1	1
1	1	1	1	1	1	1	1	1	1
1	1	1	1	1	1	1	1	1	1
1	1	1	1	1	1	1	1	1	1
1	1	1	1	1	1	1	1	1	1
1	1	1	1	1	1	1	1	1	1
1	1	1	1	1	1	1	1	1	1
1	1	1	1	1	1	1	1	1	1
1	1	1	1	1	1	1	1	1	1
1	1	1	1	1	1	1	1	1	1
1	1	1	1	1	1	1	1	1	1
1	1	1	1	1	1	1	1	1	1
1	1	1	1	1	1	1	1	1	1
1	1	1	1	1	1	1	1	1	1
1	1	1	1	1	1	1	1	1	1
1	1	1	1	1	1	1	1	1	1
1	1	1	1	1	1	1	1	1	1
1	1	1	1	1	1	1	1	1	1
1	1	1	1	1	1	1	1	1	1
1	1	1	1	1	1	1	1	1	1
1	1	1	1	1	1	1	1	1	1
1	1	1	1	1	1	1	1	1	1
1	1	1	1	1	1	1	1	1	1
1	1	1	1	1	1	1	1	1	1
1	1	1	1	1	1	1	1	1	1
1	1	1	1	1	1	1	1	1	1
1	1	1	1	1	1	1	1	1	1
1	1	1	1	1	1	1	1	1	1
1	1	1	1	1	1	1	1	1	1
1	1	1	1	1	1	1	1	1	1
1	1	1	1	1	1	1	1	1	1
1	1	1	1	1	1	1	1	1	1
1	1	1	1	1	1	1	1	1	1
1	1	1	1	1	1	1	1	1	1
1	1	1	1	1	1	1	1	1	1
1	1	1	1	1	1	1	1	1	1
1	1	1	1	1	1	1	1	1	1
1	1	1	1	1	1	1	1	1	1
1	1	1	1	1	1	1	1	1	1
1	1	1	1	1	1	1	1	1	1
1	1	1	1	1	1	1	1	1	1
1	1	1	1	1	1	1	1	1	1
1	1	1	1	1	1	1	1	1	1
1	1	1	1	1	1	1	1	1	1
1	1	1	1	1	1	1	1	1	1
1	1	1	1	1	1	1	1	1	1
1	1	1	1	1	1	1	1	1	1
1	1	1	1	1	1	1	1	1	1
1	1	1	1	1	1	1	1	1	1
1	1	1	1	1	1	1	1	1	1
1	1	1	1	1	1	1	1	1	1
1	1	1	1	1	1	1	1	1	1
1	1	1	1	1	1	1	1	1	1
1	1	1	1	1	1	1	1	1	1
1	1	1	1	1	1	1	1	1	1
1	1	1	1	1	1	1	1	1	1
1	1	1	1	1	1	1	1	1	1

## Sheet: hrl
0	0	0	0	0	0	0	0	0	0
0	0	0	0	0	0	0	0	0	0
0	0	0	0	0	0	0	0	0	0
0	0	0	0	0	0	0	0	0	0
0	0	0	0	0	0	0	0	0	0
0	0	0	0	0	0	0	0	0	0
0	0	0	0	0	0	0	0	0	0
0	0	0	0	0	0	0	0	0	0
0	0	0	0	0	0	0	0	0	0
0	0	0	0	0	0	0	0	0	0
0	0	0	0	0	0	0	0	0	0
0	0	0	0	0	0	0	0	0	0
0	0	0	0	0	0	0	0	0	0
0	0	0	0	0	0	0	0	0	0
0	0	0	0	0	0	0	0	0	0
0	0	0	0	0	0	0	0	0	0
0	0	0	0	0	0	0	0	0	0
0	0	0	0	0	0	0	0	0	0
0	0	0	0	0	0	0	0	0	0
0	0	0	0	0	0	0	0	0	0
0	0	0	0	0	0	0	0	0	0
0	0	0	0	0	0	0	0	0	0
0	0	0	0	0	0	0	0	0	0
0	0	0	0	0	0	0	0	0	0
0	0	0	0	0	0	0	0	0	0
0	0	0	0	0	0	0	0	0	0
0	0	0	0	0	0	0	0	0	0
0	0	0	0	0	0	0	0	0	0
0	0	0	0	0	0	0	0	0	0
0	0	0	0	0	0	0	0	0	0
0	0	0	0	0	0	0	0	0	0
0	0	0	0	0	0	0	0	0	0
0	0	0	0	0	0	0	0	0	0
0	0	0	0	0	0	0	0	0	0
0	0	0	0	0	0	0	0	0	0
0	0	0	0	0	0	0	0	0	0
0	0	0	0	0	0	0	0	0	0
0	0	0	0	0	0	0	0	0	0
0	0	0	0	0	0	0	0	0	0
0	0	0	0	0	0	0	0	0	0
0	0	0	0	0	0	0	0	0	0
0	0	0	0	0	0	0	0	0	0
0	0	0	0	0	0	0	0	0	0
0	0	0	0	0	0	0	0	0	0
0	0	0	0	0	0	0	0	0	0
0	0	0	0	0	0	0	0	0	0
0	0	0	0	0	0	0	0	0	0
0	0	0	0	0	0	0	0	0	0
0	0	0	0	0	0	0	0	0	0
0	0	0	0	0	0	0	0	0	0
0	0	0	0	0	0	0	0	0	0
0	0	0	0	0	0	0	0	0	0
0	0	0	0	0	0	0	0	0	0
0	0	0	0	0	0	0	0	0	0
0	0	0	0	0	0	0	0	0	0
0	0	0	0	0	0	0	0	0	0
0	0	0	0	0	0	0	0	0	0
0	0	0	0	0	0	0	0	0	0
0	0	0	0	0	0	0	0	0	0
0	0	0	0	0	0	0	0	0	0
0	0	0	0	0	0	0	0	0	0
0	0	0	0	0	0	0	0	0	0
0	0	0	0	0	0	0	0	0	0
0	0	0	0	0	0	0	0	0	0
0	0	0	0	0	0	0	0	0	0
0	0	0	0	0	0	0	0	0	0
0	0	0	0	0	0	0	0	0	0
0	0	0	0	0	0	0	0	0	0
0	0	0	0	0	0	0	0	0	0
0	0	0	0	0	0	0	0	0	0
0	0	0	0	0	0	0	0	0	0
0	0	0	0	0	0	0	0	0	0
0	0	0	0	0	0	0	0	0	0
0	0	0	0	0	0	0	0	0	0
0	0	0	0	0	0	0	0	0	0
0	0	0	0	0	0	0	0	0	0
0	0	0	0	0	0	0	0	0	0
0	0	0	0	0	0	0	0	0	0
0	0	0	0	0	0	0	0	0	0
0	0	0	0	0	0	0	0	0	0
0	0	0	0	0	0	0	0	0	0
0	0	0	0	0	0	0	0	0	0
0	0	0	0	0	0	0	0	0	0
0	0	0	0	0	0	0	0	0	0
0	0	0	0	0	0	0	0	0	0
0	0	0	0	0	0	0	0	0	0
0	0	0	0	0	0	0	0	0	0
0	0	0	0	0	0	0	0	0	0
0	0	0	0	0	0	0	0	0	0
0	0	0	0	0	0	0	0	0	0
0	0	0	0	0	0	0	0	0	0
0	0	0	0	0	0	0	0	0	0
0	0	0	0	0	0	0	0	0	0
0	0	0	0	0	0	0	0	0	0
0	0	0	0	0	0	0	0	0	0
0	0	0	0	0	0	0	0	0	0
0	0	0	0	0	0	0	0	0	0
0	0	0	0	0	0	0	0	0	0
0	0	0	0	0	0	0	0	0	0
0	0	0	0	0	0	0	0	0	0
0	0	0	0	0	0	0	0	0	0
0	0	0	0	0	0	0	0	0	0
0	0	0	0	0	0	0	0	0	0
0	0	0	0	0	0	0	0	0	0
0	0	0	0	0	0	0	0	0	0
0	0	0	0	0	0	0	0	0	0
0	0	0	0	0	0	0	0	0	0
0	0	0	0	0	0	0	0	0	0
0	0	0	0	0	0	0	0	0	0
0	0	0	0	0	0	0	0	0	0
0	0	0	0	0	0	0	0	0	0
0	0	0	0	0	0	0	0	0	0
0	0	0	0	0	0	0	0	0	0
0	0	0	0	0	0	0	0	0	0
0	0	0	0	0	0	0	0	0	0
0	0	0	0	0	0	0	0	0	0
0	0	0	0	0	0	0	0	0	0
0	0	0	0	0	0	0	0	0	0
0	0	0	0	0	0	0	0	0	0
0	0	0	0	0	0	0	0	0	0
0	0	0	0	0	0	0	0	0	0
0	0	0	0	0	0	0	0	0	0
0	0	0	0	0	0	0	0	0	0
0	0	0	0	0	0	0	0	0	0
0	0	0	0	0	0	0	0	0	0
0	0	0	0	0	0	0	0	0	0
0	0	0	0	0	0	0	0	0	0
0	0	0	0	0	0	0	0	0	0
0	0	0	0	0	0	0	0	0	0
0	0	0	0	0	0	0	0	0	0
0	0	0	0	0	0	0	0	0	0
0	0	0	0	0	0	0	0	0	0
0	0	0	0	0	0	0	0	0	0
0	0	0	0	0	0	0	0	0	0
0	0	0	0	0	0	0	0	0	0
0	0	0	0	0	0	0	0	0	0
0	0	0	0	0	0	0	0	0	0
0	0	0	0	0	0	0	0	0	0
0	0	0	0	0	0	0	0	0	0
0	0	0	0	0	0	0	0	0	0
0	0	0	0	0	0	0	0	0	0
0	0	0	0	0	0	0	0	0	0
0	0	0	0	0	0	0	0	0	0
0	0	0	0	0	0	0	0	0	0
0	0	0	0	0	0	0	0	0	0
0	0	0	0	0	0	0	0	0	0
0	0	0	0	0	0	0	0	0	0
0	0	0	0	0	0	0	0	0	0
0	0	0	0	0	0	0	0	0	0
0	0	0	0	0	0	0	0	0	0
0	0	0	0	0	0	0	0	0	0
0	0	0	0	0	0	0	0	0	0
0	0	0	0	0	0	0	0	0	0
0	0	0	0	0	0	0	0	0	0
0	0	0	0	0	0	0	0	0	0
0	0	0	0	0	0	0	0	0	0
0	0	0	0	0	0	0	0	0	0
0	0	0	0	0	0	0	0	0	0
0	0	0	0	0	0	0	0	0	0
0	0	0	0	0	0	0	0	0	0
0	0	0	0	0	0	0	0	0	0
0	0	0	0	0	0	0	0	0	0
0	0	0	0	0	0	0	0	0	0
0	0	0	0	0	0	0	0	0	0
0	0	0	0	0	0	0	0	0	0
0	0	0	0	0	0	0	0	0	0
0	0	0	0	0	0	0	0	0	0
0	0	0	0	0	0	0	0	0	0
0	0	0	0	0	0	0	0	0	0
0	0	0	0	0	0	0	0	0	0
0	0	0	0	0	0	0	0	0	0
0	0	0	0	0	0	0	0	0	0
0	0	0	0	0	0	0	0	0	0
0	0	0	0	0	0	0	0	0	0
0	0	0	0	0	0	0	0	0	0
0	0	0	0	0	0	0	0	0	0
0	0	0	0	0	0	0	0	0	0
0	0	0	0	0	0	0	0	0	0
0	0	0	0	0	0	0	0	0	0
0	0	0	0	0	0	0	0	0	0
0	0	0	0	0	0	0	0	0	0
0	0	0	0	0	0	0	0	0	0
0	0	0	0	0	0	0	0	0	0
0	0	0	0	0	0	0	0	0	0
0	0	0	0	0	0	0	0	0	0
0	0	0	0	0	0	0	0	0	0
0	0	0	0	0	0	0	0	0	0
0	0	0	0	0	0	0	0	0	0
0	0	0	0	0	0	0	0	0	0
0	0	0	0	0	0	0	0	0	0
0	0	0	0	0	0	0	0	0	0
0	0	0	0	0	0	0	0	0	0
0	0	0	0	0	0	0	0	0	0
0	0	0	0	0	0	0	0	0	0
0	0	0	0	0	0	0	0	0	0
0	0	0	0	0	0	0	0	0	0
0	0	0	0	0	0	0	0	0	0
0	0	0	0	0	0	0	0	0	0
0	0	0	0	0	0	0	0	0	0
0	0	0	0	0	0	0	0	0	0
0	0	0	0	0	0	0	0	0	0
0	0	0	0	0	0	0	0	0	0
0	0	0	0	0	0	0	0	0	0
0	0	0	0	0	0	0	0	0	0
0	0	0	0	0	0	0	0	0	0
0	0	0	0	0	0	0	0	0	0
0	0	0	0	0	0	0	0	0	0
0	0	0	0	0	0	0	0	0	0
0	0	0	0	0	0	0	0	0	0
0	0	0	0	0	0	0	0	0	0
0	0	0	0	0	0	0	0	0	0
0	0	0	0	0	0	0	0	0	0
0	0	0	0	0	0	0	0	0	0
0	0	0	0	0	0	0	0	0	0
0	0	0	0	0	0	0	0	0	0
0	0	0	0	0	0	0	0	0	0
0	0	0	0	0	0	0	0	0	0
0	0	0	0	0	0	0	0	0	0
0	0	0	0	0	0	0	0	0	0
0	0	0	0	0	0	0	0	0	0
0	0	0	0	0	0	0	0	0	0
0	0	0	0	0	0	0	0	0	0
0	0	0	0	0	0	0	0	0	0
0	0	0	0	0	0	0	0	0	0
0	0	0	0	0	0	0	0	0	0
0	0	0	0	0	0	0	0	0	0
0	0	0	0	0	0	0	0	0	0
0	0	0	0	0	0	0	0	0	0
0	0	0	0	0	0	0	0	0	0
0	0	0	0	0	0	0	0	0	0
0	0	0	0	0	0	0	0	0	0
0	0	0	0	0	0	0	0	0	0
0	0	0	0	0	0	0	0	0	0
0	0	0	0	0	0	0	0	0	0
0	0	0	0	0	0	0	0	0	0
0	0	0	0	0	0	0	0	0	0
0	0	0	0	0	0	0	0	0	0
0	0	0	0	0	0	0	0	0	0
0	0	0	0	0	0	0	0	0	0
0	0	0	0	0	0	0	0	0	0
0	0	0	0	0	0	0	0	0	0
0	0	0	0	0	0	0	0	0	0
0	0	0	0	0	0	0	0	0	0
0	0	0	0	0	0	0	0	0	0
0	0	0	0	0	0	0	0	0	0
0	0	0	0	0	0	0	0	0	0
0	0	0	0	0	0	0	0	0	0
0	0	0	0	0	0	0	0	0	0
0	0	0	0	0	0	0	0	0	0
0	0	0	0	0	0	0	0	0	0
0	0	0	0	0	0	0	0	0	0
0	0	0	0	0	0	0	0	0	0
0	0	0	0	0	0	0	0	0	0
0	0	0	0	0	0	0	0	0	0
0	0	0	0	0	0	0	0	0	0
0	0	0	0	0	0	0	0	0	0
0	0	0	0	0	0	0	0	0	0
0	0	0	0	0	0	0	0	0	0
0	0	0	0	0	0	0	0	0	0
0	0	0	0	0	0	0	0	0	0
0	0	0	0	0	0	0	0	0	0
0	0	0	0	0	0	0	0	0	0
0	0	0	0	0	0	0	0	0	0
0	0	0	0	0	0	0	0	0	0
0	0	0	0	0	0	0	0	0	0
0	0	0	0	0	0	0	0	0	0
0	0	0	0	0	0	0	0	0	0
0	0	0	0	0	0	0	0	0	0
0	0	0	0	0	0	0	0	0	0
0	0	0	0	0	0	0	0	0	0
0	0	0	0	0	0	0	0	0	0
0	0	0	0	0	0	0	0	0	0
0	0	0	0	0	0	0	0	0	0
0	0	0	0	0	0	0	0	0	0
0	0	0	0	0	0	0	0	0	0
0	0	0	0	0	0	0	0	0	0
0	0	0	0	0	0	0	0	0	0
0	0	0	0	0	0	0	0	0	0
0	0	0	0	0	0	0	0	0	0
0	0	0	0	0	0	0	0	0	0
0	0	0	0	0	0	0	0	0	0
0	0	0	0	0	0	0	0	0	0
0	0	0	0	0	0	0	0	0	0
0	0	0	0	0	0	0	0	0	0
0	0	0	0	0	0	0	0	0	0
0	0	0	0	0	0	0	0	0	0
0	0	0	0	0	0	0	0	0	0
0	0	0	0	0	0	0	0	0	0
0	0	0	0	0	0	0	0	0	0
0	0	0	0	0	0	0	0	0	0
0	0	0	0	0	0	0	0	0	0
0	0	0	0	0	0	0	0	0	0
0	0	0	0	0	0	0	0	0	0
0	0	0	0	0	0	0	0	0	0
0	0	0	0	0	0	0	0	0	0
0	0	0	0	0	0	0	0	0	0
0	0	0	0	0	0	0	0	0	0
0	0	0	0	0	0	0	0	0	0
0	0	0	0	0	0	0	0	0	0
0	0	0	0	0	0	0	0	0	0
0	0	0	0	0	0	0	0	0	0
0	0	0	0	0	0	0	0	0	0
0	0	0	0	0	0	0	0	0	0
0	0	0	0	0	0	0	0	0	0
0	0	0	0	0	0	0	0	0	0
0	0	0	0	0	0	0	0	0	0
0	0	0	0	0	0	0	0	0	0
0	0	0	0	0	0	0	0	0	0
0	0	0	0	0	0	0	0	0	0
0	0	0	0	0	0	0	0	0	0
0	0	0	0	0	0	0	0	0	0
0	0	0	0	0	0	0	0	0	0
0	0	0	0	0	0	0	0	0	0
0	0	0	0	0	0	0	0	0	0
0	0	0	0	0	0	0	0	0	0
0	0	0	0	0	0	0	0	0	0
0	0	0	0	0	0	0	0	0	0
0	0	0	0	0	0	0	0	0	0
0	0	0	0	0	0	0	0	0	0
0	0	0	0	0	0	0	0	0	0
0	0	0	0	0	0	0	0	0	0
0	0	0	0	0	0	0	0	0	0
0	0	0	0	0	0	0	0	0	0
0	0	0	0	0	0	0	0	0	0
0	0	0	0	0	0	0	0	0	0
0	0	0	0	0	0	0	0	0	0
0	0	0	0	0	0	0	0	0	0
0	0	0	0	0	0	0	0	0	0
0	0	0	0	0	0	0	0	0	0
0	0	0	0	0	0	0	0	0	0
0	0	0	0	0	0	0	0	0	0
0	0	0	0	0	0	0	0	0	0
0	0	0	0	0	0	0	0	0	0
0	0	0	0	0	0	0	0	0	0
0	0	0	0	0	0	0	0	0	0
0	0	0	0	0	0	0	0	0	0
0	0	0	0	0	0	0	0	0	0
0	0	0	0	0	0	0	0	0	0
0	0	0	0	0	0	0	0	0	0
0	0	0	0	0	0	0	0	0	0
0	0	0	0	0	0	0	0	0	0
0	0	0	0	0	0	0	0	0	0
0	0	0	0	0	0	0	0	0	0
0	0	0	0	0	0	0	0	0	0
0	0	0	0	0	0	0	0	0	0
0	0	0	0	0	0	0	0	0	0
0	0	0	0	0	0	0	0	0	0
0	0	0	0	0	0	0	0	0	0
0	0	0	0	0	0	0	0	0	0
0	0	0	0	0	0	0	0	0	0
0	0	0	0	0	0	0	0	0	0
0	0	0	0	0	0	0	0	0	0
0	0	0	0	0	0	0	0	0	0
0	0	0	0	0	0	0	0	0	0
0	0	0	0	0	0	0	0	0	0
0	0	0	0	0	0	0	0	0	0
0	0	0	0	0	0	0	0	0	0
0	0	0	0	0	0	0	0	0	0
0	0	0	0	0	0	0	0	0	0
0	0	0	0	0	0	0	0	0	0
0	0	0	0	0	0	0	0	0	0
0	0	0	0	0	0	0	0	0	0
0	0	0	0	0	0	0	0	0	0
0	0	0	0	0	0	0	0	0	0
0	0	0	0	0	0	0	0	0	0
0	0	0	0	0	0	0	0	0	0
0	0	0	0	0	0	0	0	0	0
0	0	0	0	0	0	0	0	0	0
0	0	0	0	0	0	0	0	0	0
0	0	0	0	0	0	0	0	0	0
0	0	0	0	0	0	0	0	0	0
0	0	0	0	0	0	0	0	0	0
0	0	0	0	0	0	0	0	0	0
0	0	0	0	0	0	0	0	0	0
0	0	0	0	0	0	0	0	0	0
0	0	0	0	0	0	0	0	0	0
0	0	0	0	0	0	0	0	0	0
0	0	0	0	0	0	0	0	0	0
0	0	0	0	0	0	0	0	0	0
0	0	0	0	0	0	0	0	0	0
0	0	0	0	0	0	0	0	0	0
0	0	0	0	0	0	0	0	0	0
0	0	0	0	0	0	0	0	0	0
0	0	0	0	0	0	0	0	0	0
0	0	0	0	0	0	0	0	0	0
0	0	0	0	0	0	0	0	0	0
0	0	0	0	0	0	0	0	0	0
0	0	0	0	0	0	0	0	0	0
0	0	0	0	0	0	0	0	0	0
0	0	0	0	0	0	0	0	0	0
0	0	0	0	0	0	0	0	0	0
0	0	0	0	0	0	0	0	0	0
0	0	0	0	0	0	0	0	0	0
0	0	0	0	0	0	0	0	0	0
0	0	0	0	0	0	0	0	0	0
0	0	0	0	0	0	0	0	0	0
0	0	0	0	0	0	0	0	0	0
0	0	0	0	0	0	0	0	0	0
0	0	0	0	0	0	0	0	0	0
0	0	0	0	0	0	0	0	0	0
0	0	0	0	0	0	0	0	0	0
0	0	0	0	0	0	0	0	0	0
0	0	0	0	0	0	0	0	0	0
0	0	0	0	0	0	0	0	0	0
0	0	0	0	0	0	0	0	0	0
0	0	0	0	0	0	0	0	0	0
0	0	0	0	0	0	0	0	0	0
0	0	0	0	0	0	0	0	0	0
0	0	0	0	0	0	0	0	0	0
0	0	0	0	0	0	0	0	0	0
0	0	0	0	0	0	0	0	0	0
0	0	0	0	0	0	0	0	0	0
0	0	0	0	0	0	0	0	0	0
0	0	0	0	0	0	0	0	0	0
0	0	0	0	0	0	0	0	0	0
0	0	0	0	0	0	0	0	0	0
0	0	0	0	0	0	0	0	0	0
0	0	0	0	0	0	0	0	0	0
0	0	0	0	0	0	0	0	0	0
0	0	0	0	0	0	0	0	0	0
0	0	0	0	0	0	0	0	0	0
0	0	0	0	0	0	0	0	0	0
0	0	0	0	0	0	0	0	0	0
0	0	0	0	0	0	0	0	0	0
0	0	0	0	0	0	0	0	0	0
0	0	0	0	0	0	0	0	0	0
0	0	0	0	0	0	0	0	0	0
0	0	0	0	0	0	0	0	0	0
0	0	0	0	0	0	0	0	0	0
0	0	0	0	0	0	0	0	0	0
0	0	0	0	0	0	0	0	0	0
0	0	0	0	0	0	0	0	0	0
0	0	0	0	0	0	0	0	0	0
0	0	0	0	0	0	0	0	0	0
0	0	0	0	0	0	0	0	0	0
0	0	0	0	0	0	0	0	0	0
0	0	0	0	0	0	0	0	0	0
0	0	0	0	0	0	0	0	0	0
0	0	0	0	0	0	0	0	0	0
0	0	0	0	0	0	0	0	0	0
0	0	0	0	0	0	0	0	0	0
0	0	0	0	0	0	0	0	0	0
0	0	0	0	0	0	0	0	0	0
0	0	0	0	0	0	0	0	0	0
0	0	0	0	0	0	0	0	0	0
0	0	0	0	0	0	0	0	0	0
0	0	0	0	0	0	0	0	0	0
0	0	0	0	0	0	0	0	0	0
0	0	0	0	0	0	0	0	0	0
0	0	0	0	0	0	0	0	0	0
0	0	0	0	0	0	0	0	0	0
0	0	0	0	0	0	0	0	0	0
0	0	0	0	0	0	0	0	0	0
0	0	0	0	0	0	0	0	0	0
0	0	0	0	0	0	0	0	0	0
0	0	0	0	0	0	0	0	0	0
0	0	0	0	0	0	0	0	0	0
0	0	0	0	0	0	0	0	0	0
0	0	0	0	0	0	0	0	0	0
0	0	0	0	0	0	0	0	0	0
0	0	0	0	0	0	0	0	0	0
0	0	0	0	0	0	0	0	0	0
0	0	0	0	0	0	0	0	0	0
0	0	0	0	0	0	0	0	0	0
0	0	0	0	0	0	0	0	0	0
0	0	0	0	0	0	0	0	0	0
0	0	0	0	0	0	0	0	0	0
0	0	0	0	0	0	0	0	0	0
0	0	0	0	0	0	0	0	0	0
0	0	0	0	0	0	0	0	0	0
0	0	0	0	0	0	0	0	0	0
0	0	0	0	0	0	0	0	0	0
0	0	0	0	0	0	0	0	0	0
0	0	0	0	0	0	0	0	0	0
0	0	0	0	0	0	0	0	0	0
0	0	0	0	0	0	0	0	0	0
0	0	0	0	0	0	0	0	0	0
0	0	0	0	0	0	0	0	0	0
0	0	0	0	0	0	0	0	0	0
0	0	0	0	0	0	0	0	0	0
0	0	0	0	0	0	0	0	0	0
0	0	0	0	0	0	0	0	0	0
0	0	0	0	0	0	0	0	0	0
0	0	0	0	0	0	0	0	0	0
0	0	0	0	0	0	0	0	0	0
0	0	0	0	0	0	0	0	0	0
0	0	0	0	0	0	0	0	0	0
0	0	0	0	0	0	0	0	0	0
0	0	0	0	0	0	0	0	0	0
0	0	0	0	0	0	0	0	0	0
0	0	0	0	0	0	0	0	0	0
0	0	0	0	0	0	0	0	0	0
0	0	0	0	0	0	0	0	0	0
0	0	0	0	0	0	0	0	0	0
0	0	0	0	0	0	0	0	0	0
0	0	0	0	0	0	0	0	0	0
0	0	0	0	0	0	0	0	0	0
0	0	0	0	0	0	0	0	0	0
0	0	0	0	0	0	0	0	0	0
0	0	0	0	0	0	0	0	0	0
0	0	0	0	0	0	0	0	0	0
0	0	0	0	0	0	0	0	0	0
0	0	0	0	0	0	0	0	0	0
0	0	0	0	0	0	0	0	0	0
0	0	0	0	0	0	0	0	0	0
0	0	0	0	0	0	0	0	0	0
0	0	0	0	0	0	0	0	0	0
0	0	0	0	0	0	0	0	0	0
0	0	0	0	0	0	0	0	0	0
0	0	0	0	0	0	0	0	0	0
0	0	0	0	0	0	0	0	0	0
0	0	0	0	0	0	0	0	0	0
0	0	0	0	0	0	0	0	0	0
0	0	0	0	0	0	0	0	0	0
0	0	0	0	0	0	0	0	0	0
0	0	0	0	0	0	0	0	0	0
0	0	0	0	0	0	0	0	0	0
0	0	0	0	0	0	0	0	0	0
0	0	0	0	0	0	0	0	0	0
0	0	0	0	0	0	0	0	0	0
0	0	0	0	0	0	0	0	0	0
0	0	0	0	0	0	0	0	0	0
0	0	0	0	0	0	0	0	0	0
0	0	0	0	0	0	0	0	0	0
0	0	0	0	0	0	0	0	0	0
0	0	0	0	0	0	0	0	0	0
0	0	0	0	0	0	0	0	0	0
0	0	0	0	0	0	0	0	0	0
0	0	0	0	0	0	0	0	0	0
0	0	0	0	0	0	0	0	0	0
0	0	0	0	0	0	0	0	0	0
0	0	0	0	0	0	0	0	0	0
0	0	0	0	0	0	0	0	0	0
0	0	0	0	0	0	0	0	0	0
0	0	0	0	0	0	0	0	0	0
0	0	0	0	0	0	0	0	0	0
0	0	0	0	0	0	0	0	0	0
0	0	0	0	0	0	0	0	0	0
0	0	0	0	0	0	0	0	0	0
0	0	0	0	0	0	0	0	0	0
0	0	0	0	0	0	0	0	0	0
0	0	0	0	0	0	0	0	0	0
0	0	0	0	0	0	0	0	0	0
0	0	0	0	0	0	0	0	0	0
0	0	0	0	0	0	0	0	0	0
0	0	0	0	0	0	0	0	0	0
0	0	0	0	0	0	0	0	0	0
0	0	0	0	0	0	0	0	0	0
0	0	0	0	0	0	0	0	0	0
0	0	0	0	0	0	0	0	0	0
0	0	0	0	0	0	0	0	0	0
0	0	0	0	0	0	0	0	0	0
0	0	0	0	0	0	0	0	0	0
0	0	0	0	0	0	0	0	0	0
0	0	0	0	0	0	0	0	0	0
0	0	0	0	0	0	0	0	0	0
0	0	0	0	0	0	0	0	0	0
0	0	0	0	0	0	0	0	0	0
0	0	0	0	0	0	0	0	0	0
0	0	0	0	0	0	0	0	0	0
0	0	0	0	0	0	0	0	0	0
0	0	0	0	0	0	0	0	0	0
0	0	0	0	0	0	0	0	0	0
0	0	0	0	0	0	0	0	0	0
0	0	0	0	0	0	0	0	0	0
0	0	0	0	0	0	0	0	0	0
0	0	0	0	0	0	0	0	0	0
0	0	0	0	0	0	0	0	0	0
0	0	0	0	0	0	0	0	0	0
0	0	0	0	0	0	0	0	0	0
0	0	0	0	0	0	0	0	0	0
0	0	0	0	0	0	0	0	0	0
0	0	0	0	0	0	0	0	0	0
0	0	0	0	0	0	0	0	0	0
0	0	0	0	0	0	0	0	0	0
0	0	0	0	0	0	0	0	0	0
0	0	0	0	0	0	0	0	0	0
0	0	0	0	0	0	0	0	0	0
0	0	0	0	0	0	0	0	0	0
0	0	0	0	0	0	0	0	0	0
0	0	0	0	0	0	0	0	0	0
0	0	0	0	0	0	0	0	0	0
0	0	0	0	0	0	0	0	0	0
0	0	0	0	0	0	0	0	0	0
0	0	0	0	0	0	0	0	0	0
0	0	0	0	0	0	0	0	0	0
0	0	0	0	0	0	0	0	0	0
0	0	0	0	0	0	0	0	0	0
0	0	0	0	0	0	0	0	0	0
0	0	0	0	0	0	0	0	0	0
0	0	0	0	0	0	0	0	0	0
0	0	0	0	0	0	0	0	0	0
0	0	0	0	0	0	0	0	0	0
0	0	0	0	0	0	0	0	0	0
0	0	0	0	0	0	0	0	0	0
0	0	0	0	0	0	0	0	0	0
0	0	0	0	0	0	0	0	0	0
0	0	0	0	0	0	0	0	0	0
0	0	0	0	0	0	0	0	0	0
0	0	0	0	0	0	0	0	0	0
0	0	0	0	0	0	0	0	0	0
0	0	0	0	0	0	0	0	0	0
0	0	0	0	0	0	0	0	0	0
0	0	0	0	0	0	0	0	0	0
0	0	0	0	0	0	0	0	0	0
0	0	0	0	0	0	0	0	0	0
0	0	0	0	0	0	0	0	0	0
0	0	0	0	0	0	0	0	0	0
0	0	0	0	0	0	0	0	0	0
0	0	0	0	0	0	0	0	0	0
0	0	0	0	0	0	0	0	0	0
0	0	0	0	0	0	0	0	0	0
0	0	0	0	0	0	0	0	0	0
0	0	0	0	0	0	0	0	0	0
0	0	0	0	0	0	0	0	0	0
0	0	0	0	0	0	0	0	0	0
0	0	0	0	0	0	0	0	0	0
0	0	0	0	0	0	0	0	0	0
0	0	0	0	0	0	0	0	0	0
0	0	0	0	0	0	0	0	0	0
0	0	0	0	0	0	0	0	0	0
0	0	0	0	0	0	0	0	0	0
0	0	0	0	0	0	0	0	0	0
0	0	0	0	0	0	0	0	0	0
0	0	0	0	0	0	0	0	0	0
0	0	0	0	0	0	0	0	0	0
0	0	0	0	0	0	0	0	0	0
0	0	0	0	0	0	0	0	0	0
0	0	0	0	0	0	0	0	0	0
0	0	0	0	0	0	0	0	0	0
0	0	0	0	0	0	0	0	0	0
0	0	0	0	0	0	0	0	0	0
0	0	0	0	0	0	0	0	0	0
0	0	0	0	0	0	0	0	0	0
0	0	0	0	0	0	0	0	0	0
0	0	0	0	0	0	0	0	0	0
0	0	0	0	0	0	0	0	0	0
0	0	0	0	0	0	0	0	0	0
0	0	0	0	0	0	0	0	0	0
0	0	0	0	0	0	0	0	0	0
0	0	0	0	0	0	0	0	0	0
0	0	0	0	0	0	0	0	0	0
0	0	0	0	0	0	0	0	0	0
0	0	0	0	0	0	0	0	0	0
0	0	0	0	0	0	0	0	0	0
0	0	0	0	0	0	0	0	0	0
0	0	0	0	0	0	0	0	0	0
0	0	0	0	0	0	0	0	0	0
0	0	0	0	0	0	0	0	0	0
0	0	0	0	0	0	0	0	0	0
0	0	0	0	0	0	0	0	0	0
0	0	0	0	0	0	0	0	0	0
0	0	0	0	0	0	0	0	0	0
0	0	0	0	0	0	0	0	0	0
0	0	0	0	0	0	0	0	0	0
0	0	0	0	0	0	0	0	0	0
0	0	0	0	0	0	0	0	0	0
0	0	0	0	0	0	0	0	0	0
0	0	0	0	0	0	0	0	0	0
0	0	0	0	0	0	0	0	0	0
0	0	0	0	0	0	0	0	0	0
0	0	0	0	0	0	0	0	0	0
0	0	0	0	0	0	0	0	0	0
0	0	0	0	0	0	0	0	0	0
0	0	0	0	0	0	0	0	0	0
0	0	0	0	0	0	0	0	0	0
0	0	0	0	0	0	0	0	0	0
0	0	0	0	0	0	0	0	0	0
0	0	0	0	0	0	0	0	0	0
0	0	0	0	0	0	0	0	0	0
0	0	0	0	0	0	0	0	0	0
0	0	0	0	0	0	0	0	0	0
0	0	0	0	0	0	0	0	0	0
0	0	0	0	0	0	0	0	0	0
0	0	0	0	0	0	0	0	0	0
0	0	0	0	0	0	0	0	0	0
0	0	0	0	0	0	0	0	0	0
0	0	0	0	0	0	0	0	0	0
0	0	0	0	0	0	0	0	0	0
0	0	0	0	0	0	0	0	0	0
0	0	0	0	0	0	0	0	0	0
0	0	0	0	0	0	0	0	0	0
0	0	0	0	0	0	0	0	0	0
0	0	0	0	0	0	0	0	0	0
0	0	0	0	0	0	0	0	0	0
0	0	0	0	0	0	0	0	0	0
0	0	0	0	0	0	0	0	0	0
0	0	0	0	0	0	0	0	0	0
0	0	0	0	0	0	0	0	0	0
0	0	0	0	0	0	0	0	0	0
0	0	0	0	0	0	0	0	0	0
0	0	0	0	0	0	0	0	0	0
0	0	0	0	0	0	0	0	0	0
0	0	0	0	0	0	0	0	0	0
0	0	0	0	0	0	0	0	0	0
0	0	0	0	0	0	0	0	0	0
0	0	0	0	0	0	0	0	0	0
0	0	0	0	0	0	0	0	0	0
0	0	0	0	0	0	0	0	0	0
0	0	0	0	0	0	0	0	0	0
0	0	0	0	0	0	0	0	0	0
0	0	0	0	0	0	0	0	0	0
0	0	0	0	0	0	0	0	0	0
0	0	0	0	0	0	0	0	0	0
0	0	0	0	0	0	0	0	0	0
0	0	0	0	0	0	0	0	0	0
0	0	0	0	0	0	0	0	0	0
0	0	0	0	0	0	0	0	0	0
0	0	0	0	0	0	0	0	0	0
0	0	0	0	0	0	0	0	0	0
0	0	0	0	0	0	0	0	0	0
0	0	0	0	0	0	0	0	0	0
0	0	0	0	0	0	0	0	0	0
0	0	0	0	0	0	0	0	0	0
0	0	0	0	0	0	0	0	0	0
0	0	0	0	0	0	0	0	0	0
0	0	0	0	0	0	0	0	0	0
0	0	0	0	0	0	0	0	0	0
0	0	0	0	0	0	0	0	0	0
0	0	0	0	0	0	0	0	0	0
0	0	0	0	0	0	0	0	0	0
0	0	0	0	0	0	0	0	0	0
0	0	0	0	0	0	0	0	0	0
0	0	0	0	0	0	0	0	0	0
0	0	0	0	0	0	0	0	0	0
0	0	0	0	0	0	0	0	0	0
0	0	0	0	0	0	0	0	0	0
0	0	0	0	0	0	0	0	0	0
0	0	0	0	0	0	0	0	0	0
0	0	0	0	0	0	0	0	0	0
0	0	0	0	0	0	0	0	0	0
0	0	0	0	0	0	0	0	0	0
0	0	0	0	0	0	0	0	0	0
0	0	0	0	0	0	0	0	0	0
0	0	0	0	0	0	0	0	0	0
0	0	0	0	0	0	0	0	0	0
0	0	0	0	0	0	0	0	0	0
0	0	0	0	0	0	0	0	0	0
0	0	0	0	0	0	0	0	0	0
0	0	0	0	0	0	0	0	0	0
0	0	0	0	0	0	0	0	0	0
0	0	0	0	0	0	0	0	0	0
0	0	0	0	0	0	0	0	0	0
0	0	0	0	0	0	0	0	0	0
0	0	0	0	0	0	0	0	0	0
0	0	0	0	0	0	0	0	0	0
0	0	0	0	0	0	0	0	0	0
0	0	0	0	0	0	0	0	0	0
0	0	0	0	0	0	0	0	0	0
0	0	0	0	0	0	0	0	0	0
0	0	0	0	0	0	0	0	0	0
0	0	0	0	0	0	0	0	0	0
0	0	0	0	0	0	0	0	0	0
0	0	0	0	0	0	0	0	0	0
0	0	0	0	0	0	0	0	0	0
0	0	0	0	0	0	0	0	0	0
0	0	0	0	0	0	0	0	0	0
0	0	0	0	0	0	0	0	0	0
0	0	0	0	0	0	0	0	0	0
0	0	0	0	0	0	0	0	0	0
0	0	0	0	0	0	0	0	0	0
0	0	0	0	0	0	0	0	0	0
0	0	0	0	0	0	0	0	0	0
0	0	0	0	0	0	0	0	0	0
0	0	0	0	0	0	0	0	0	0
0	0	0	0	0	0	0	0	0	0
0	0	0	0	0	0	0	0	0	0
0	0	0	0	0	0	0	0	0	0
0	0	0	0	0	0	0	0	0	0
0	0	0	0	0	0	0	0	0	0
0	0	0	0	0	0	0	0	0	0
0	0	0	0	0	0	0	0	0	0
0	0	0	0	0	0	0	0	0	0
0	0	0	0	0	0	0	0	0	0
0	0	0	0	0	0	0	0	0	0
0	0	0	0	0	0	0	0	0	0
0	0	0	0	0	0	0	0	0	0
0	0	0	0	0	0	0	0	0	0
0	0	0	0	0	0	0	0	0	0
0	0	0	0	0	0	0	0	0	0
0	0	0	0	0	0	0	0	0	0
0	0	0	0	0	0	0	0	0	0
0	0	0	0	0	0	0	0	0	0
0	0	0	0	0	0	0	0	0	0
0	0	0	0	0	0	0	0	0	0
0	0	0	0	0	0	0	0	0	0
0	0	0	0	0	0	0	0	0	0
0	0	0	0	0	0	0	0	0	0
0	0	0	0	0	0	0	0	0	0
0	0	0	0	0	0	0	0	0	0
0	0	0	0	0	0	0	0	0	0
0	0	0	0	0	0	0	0	0	0
0	0	0	0	0	0	0	0	0	0
0	0	0	0	0	0	0	0	0	0
0	0	0	0	0	0	0	0	0	0
0	0	0	0	0	0	0	0	0	0
0	0	0	0	0	0	0	0	0	0
0	0	0	0	0	0	0	0	0	0
0	0	0	0	0	0	0	0	0	0
0	0	0	0	0	0	0	0	0	0
0	0	0	0	0	0	0	0	0	0
0	0	0	0	0	0	0	0	0	0
0	0	0	0	0	0	0	0	0	0
0	0	0	0	0	0	0	0	0	0
0	0	0	0	0	0	0	0	0	0
0	0	0	0	0	0	0	0	0	0
0	0	0	0	0	0	0	0	0	0
0	0	0	0	0	0	0	0	0	0
0	0	0	0	0	0	0	0	0	0
0	0	0	0	0	0	0	0	0	0
0	0	0	0	0	0	0	0	0	0
0	0	0	0	0	0	0	0	0	0
0	0	0	0	0	0	0	0	0	0
0	0	0	0	0	0	0	0	0	0
0	0	0	0	0	0	0	0	0	0
0	0	0	0	0	0	0	0	0	0
0	0	0	0	0	0	0	0	0	0
0	0	0	0	0	0	0	0	0	0
0	0	0	0	0	0	0	0	0	0
0	0	0	0	0	0	0	0	0	0
0	0	0	0	0	0	0	0	0	0
0	0	0	0	0	0	0	0	0	0
0	0	0	0	0	0	0	0	0	0
0	0	0	0	0	0	0	0	0	0
0	0	0	0	0	0	0	0	0	0
0	0	0	0	0	0	0	0	0	0
0	0	0	0	0	0	0	0	0	0
0	0	0	0	0	0	0	0	0	0
0	0	0	0	0	0	0	0	0	0
0	0	0	0	0	0	0	0	0	0
0	0	0	0	0	0	0	0	0	0
0	0	0	0	0	0	0	0	0	0
0	0	0	0	0	0	0	0	0	0
0	0	0	0	0	0	0	0	0	0
0	0	0	0	0	0	0	0	0	0
0	0	0	0	0	0	0	0	0	0
0	0	0	0	0	0	0	0	0	0
0	0	0	0	0	0	0	0	0	0
0	0	0	0	0	0	0	0	0	0
0	0	0	0	0	0	0	0	0	0
0	0	0	0	0	0	0	0	0	0
0	0	0	0	0	0	0	0	0	0
0	0	0	0	0	0	0	0	0	0
0	0	0	0	0	0	0	0	0	0
0	0	0	0	0	0	0	0	0	0
0	0	0	0	0	0	0	0	0	0
0	0	0	0	0	0	0	0	0	0
0	0	0	0	0	0	0	0	0	0
0	0	0	0	0	0	0	0	0	0
0	0	0	0	0	0	0	0	0	0
0	0	0	0	0	0	0	0	0	0
0	0	0	0	0	0	0	0	0	0
0	0	0	0	0	0	0	0	0	0
0	0	0	0	0	0	0	0	0	0
0	0	0	0	0	0	0	0	0	0
0	0	0	0	0	0	0	0	0	0
0	0	0	0	0	0	0	0	0	0
0	0	0	0	0	0	0	0	0	0
0	0	0	0	0	0	0	0	0	0
0	0	0	0	0	0	0	0	0	0
0	0	0	0	0	0	0	0	0	0
0	0	0	0	0	0	0	0	0	0
0	0	0	0	0	0	0	0	0	0
0	0	0	0	0	0	0	0	0	0
0	0	0	0	0	0	0	0	0	0
0	0	0	0	0	0	0	0	0	0
0	0	0	0	0	0	0	0	0	0
0	0	0	0	0	0	0	0	0	0
0	0	0	0	0	0	0	0	0	0
0	0	0	0	0	0	0	0	0	0
0	0	0	0	0	0	0	0	0	0
0	0	0	0	0	0	0	0	0	0
0	0	0	0	0	0	0	0	0	0
0	0	0	0	0	0	0	0	0	0
0	0	0	0	0	0	0	0	0	0
0	0	0	0	0	0	0	0	0	0
0	0	0	0	0	0	0	0	0	0
0	0	0	0	0	0	0	0	0	0
0	0	0	0	0	0	0	0	0	0
0	0	0	0	0	0	0	0	0	0
0	0	0	0	0	0	0	0	0	0
0	0	0	0	0	0	0	0	0	0
0	0	0	0	0	0	0	0	0	0
0	0	0	0	0	0	0	0	0	0
0	0	0	0	0	0	0	0	0	0
0	0	0	0	0	0	0	0	0	0
0	0	0	0	0	0	0	0	0	0
0	0	0	0	0	0	0	0	0	0
0	0	0	0	0	0	0	0	0	0
0	0	0	0	0	0	0	0	0	0
0	0	0	0	0	0	0	0	0	0
0	0	0	0	0	0	0	0	0	0
0	0	0	0	0	0	0	0	0	0
0	0	0	0	0	0	0	0	0	0
0	0	0	0	0	0	0	0	0	0
0	0	0	0	0	0	0	0	0	0
0	0	0	0	0	0	0	0	0	0
0	0	0	0	0	0	0	0	0	0
0	0	0	0	0	0	0	0	0	0
0	0	0	0	0	0	0	0	0	0
0	0	0	0	0	0	0	0	0	0
0	0	0	0	0	0	0	0	0	0
0	0	0	0	0	0	0	0	0	0
0	0	0	0	0	0	0	0	0	0
0	0	0	0	0	0	0	0	0	0
0	0	0	0	0	0	0	0	0	0
0	0	0	0	0	0	0	0	0	0
0	0	0	0	0	0	0	0	0	0
0	0	0	0	0	0	0	0	0	0
0	0	0	0	0	0	0	0	0	0
0	0	0	0	0	0	0	0	0	0
0	0	0	0	0	0	0	0	0	0
0	0	0	0	0	0	0	0	0	0
0	0	0	0	0	0	0	0	0	0
0	0	0	0	0	0	0	0	0	0
0	0	0	0	0	0	0	0	0	0
0	0	0	0	0	0	0	0	0	0
0	0	0	0	0	0	0	0	0	0
0	0	0	0	0	0	0	0	0	0
0	0	0	0	0	0	0	0	0	0
0	0	0	0	0	0	0	0	0	0
0	0	0	0	0	0	0	0	0	0
0	0	0	0	0	0	0	0	0	0
0	0	0	0	0	0	0	0	0	0
0	0	0	0	0	0	0	0	0	0
0	0	0	0	0	0	0	0	0	0
0	0	0	0	0	0	0	0	0	0
0	0	0	0	0	0	0	0	0	0
0	0	0	0	0	0	0	0	0	0
0	0	0	0	0	0	0	0	0	0
0	0	0	0	0	0	0	0	0	0
0	0	0	0	0	0	0	0	0	0
0	0	0	0	0	0	0	0	0	0
0	0	0	0	0	0	0	0	0	0
0	0	0	0	0	0	0	0	0	0
0	0	0	0	0	0	0	0	0	0
0	0	0	0	0	0	0	0	0	0
0	0	0	0	0	0	0	0	0	0
0	0	0	0	0	0	0	0	0	0
0	0	0	0	0	0	0	0	0	0
0	0	0	0	0	0	0	0	0	0
0	0	0	0	0	0	0	0	0	0
0	0	0	0	0	0	0	0	0	0
0	0	0	0	0	0	0	0	0	0
0	0	0	0	0	0	0	0	0	0
0	0	0	0	0	0	0	0	0	0
0	0	0	0	0	0	0	0	0	0
0	0	0	0	0	0	0	0	0	0
0	0	0	0	0	0	0	0	0	0
0	0	0	0	0	0	0	0	0	0
0	0	0	0	0	0	0	0	0	0
0	0	0	0	0	0	0	0	0	0
0	0	0	0	0	0	0	0	0	0
0	0	0	0	0	0	0	0	0	0
0	0	0	0	0	0	0	0	0	0
0	0	0	0	0	0	0	0	0	0
0	0	0	0	0	0	0	0	0	0
0	0	0	0	0	0	0	0	0	0
0	0	0	0	0	0	0	0	0	0
0	0	0	0	0	0	0	0	0	0
0	0	0	0	0	0	0	0	0	0
0	0	0	0	0	0	0	0	0	0
0	0	0	0	0	0	0	0	0	0
0	0	0	0	0	0	0	0	0	0
0	0	0	0	0	0	0	0	0	0
0	0	0	0	0	0	0	0	0	0
0	0	0	0	0	0	0	0	0	0
0	0	0	0	0	0	0	0	0	0
0	0	0	0	0	0	0	0	0	0
0	0	0	0	0	0	0	0	0	0
0	0	0	0	0	0	0	0	0	0
0	0	0	0	0	0	0	0	0	0
0	0	0	0	0	0	0	0	0	0
0	0	0	0	0	0	0	0	0	0
0	0	0	0	0	0	0	0	0	0
0	0	0	0	0	0	0	0	0	0
0	0	0	0	0	0	0	0	0	0
0	0	0	0	0	0	0	0	0	0
0	0	0	0	0	0	0	0	0	0
0	0	0	0	0	0	0	0	0	0
0	0	0	0	0	0	0	0	0	0
0	0	0	0	0	0	0	0	0	0
0	0	0	0	0	0	0	0	0	0
0	0	0	0	0	0	0	0	0	0
0	0	0	0	0	0	0	0	0	0
0	0	0	0	0	0	0	0	0	0
0	0	0	0	0	0	0	0	0	0
0	0	0	0	0	0	0	0	0	0
0	0	0	0	0	0	0	0	0	0
0	0	0	0	0	0	0	0	0	0
0	0	0	0	0	0	0	0	0	0
0	0	0	0	0	0	0	0	0	0
0	0	0	0	0	0	0	0	0	0
0	0	0	0	0	0	0	0	0	0
0	0	0	0	0	0	0	0	0	0
0	0	0	0	0	0	0	0	0	0
0	0	0	0	0	0	0	0	0	0
0	0	0	0	0	0	0	0	0	0
0	0	0	0	0	0	0	0	0	0
0	0	0	0	0	0	0	0	0	0
0	0	0	0	0	0	0	0	0	0
0	0	0	0	0	0	0	0	0	0
0	0	0	0	0	0	0	0	0	0
0	0	0	0	0	0	0	0	0	0
0	0	0	0	0	0	0	0	0	0
0	0	0	0	0	0	0	0	0	0
0	0	0	0	0	0	0	0	0	0
0	0	0	0	0	0	0	0	0	0
0	0	0	0	0	0	0	0	0	0
0	0	0	0	0	0	0	0	0	0
0	0	0	0	0	0	0	0	0	0
0	0	0	0	0	0	0	0	0	0
0	0	0	0	0	0	0	0	0	0
0	0	0	0	0	0	0	0	0	0
0	0	0	0	0	0	0	0	0	0
0	0	0	0	0	0	0	0	0	0
0	0	0	0	0	0	0	0	0	0
0	0	0	0	0	0	0	0	0	0
0	0	0	0	0	0	0	0	0	0
0	0	0	0	0	0	0	0	0	0
0	0	0	0	0	0	0	0	0	0
0	0	0	0	0	0	0	0	0	0
0	0	0	0	0	0	0	0	0	0
0	0	0	0	0	0	0	0	0	0
0	0	0	0	0	0	0	0	0	0
0	0	0	0	0	0	0	0	0	0
0	0	0	0	0	0	0	0	0	0
0	0	0	0	0	0	0	0	0	0
0	0	0	0	0	0	0	0	0	0
0	0	0	0	0	0	0	0	0	0
0	0	0	0	0	0	0	0	0	0
0	0	0	0	0	0	0	0	0	0
0	0	0	0	0	0	0	0	0	0
0	0	0	0	0	0	0	0	0	0
0	0	0	0	0	0	0	0	0	0
0	0	0	0	0	0	0	0	0	0
0	0	0	0	0	0	0	0	0	0
0	0	0	0	0	0	0	0	0	0
0	0	0	0	0	0	0	0	0	0
0	0	0	0	0	0	0	0	0	0
0	0	0	0	0	0	0	0	0	0
0	0	0	0	0	0	0	0	0	0
0	0	0	0	0	0	0	0	0	0
0	0	0	0	0	0	0	0	0	0
0	0	0	0	0	0	0	0	0	0
0	0	0	0	0	0	0	0	0	0
0	0	0	0	0	0	0	0	0	0
0	0	0	0	0	0	0	0	0	0
0	0	0	0	0	0	0	0	0	0
0	0	0	0	0	0	0	0	0	0
0	0	0	0	0	0	0	0	0	0
0	0	0	0	0	0	0	0	0	0
0	0	0	0	0	0	0	0	0	0
0	0	0	0	0	0	0	0	0	0
0	0	0	0	0	0	0	0	0	0
0	0	0	0	0	0	0	0	0	0
0	0	0	0	0	0	0	0	0	0
0	0	0	0	0	0	0	0	0	0
0	0	0	0	0	0	0	0	0	0
0	0	0	0	0	0	0	0	0	0
0	0	0	0	0	0	0	0	0	0
0	0	0	0	0	0	0	0	0	0
0	0	0	0	0	0	0	0	0	0
0	0	0	0	0	0	0	0	0	0
0	0	0	0	0	0	0	0	0	0
0	0	0	0	0	0	0	0	0	0
0	0	0	0	0	0	0	0	0	0
0	0	0	0	0	0	0	0	0	0
0	0	0	0	0	0	0	0	0	0
0	0	0	0	0	0	0	0	0	0
0	0	0	0	0	0	0	0	0	0
0	0	0	0	0	0	0	0	0	0
0	0	0	0	0	0	0	0	0	0
0	0	0	0	0	0	0	0	0	0
0	0	0	0	0	0	0	0	0	0
0	0	0	0	0	0	0	0	0	0
0	0	0	0	0	0	0	0	0	0
0	0	0	0	0	0	0	0	0	0
0	0	0	0	0	0	0	0	0	0
0	0	0	0	0	0	0	0	0	0
0	0	0	0	0	0	0	0	0	0
0	0	0	0	0	0	0	0	0	0
0	0	0	0	0	0	0	0	0	0
0	0	0	0	0	0	0	0	0	0
0	0	0	0	0	0	0	0	0	0
0	0	0	0	0	0	0	0	0	0
0	0	0	0	0	0	0	0	0	0
0	0	0	0	0	0	0	0	0	0
0	0	0	0	0	0	0	0	0	0
0	0	0	0	0	0	0	0	0	0
0	0	0	0	0	0	0	0	0	0
0	0	0	0	0	0	0	0	0	0
0	0	0	0	0	0	0	0	0	0
0	0	0	0	0	0	0	0	0	0
0	0	0	0	0	0	0	0	0	0
0	0	0	0	0	0	0	0	0	0
0	0	0	0	0	0	0	0	0	0
0	0	0	0	0	0	0	0	0	0
0	0	0	0	0	0	0	0	0	0
0	0	0	0	0	0	0	0	0	0
0	0	0	0	0	0	0	0	0	0
0	0	0	0	0	0	0	0	0	0
0	0	0	0	0	0	0	0	0	0
0	0	0	0	0	0	0	0	0	0
0	0	0	0	0	0	0	0	0	0
0	0	0	0	0	0	0	0	0	0
0	0	0	0	0	0	0	0	0	0
0	0	0	0	0	0	0	0	0	0
0	0	0	0	0	0	0	0	0	0
0	0	0	0	0	0	0	0	0	0
0	0	0	0	0	0	0	0	0	0
0	0	0	0	0	0	0	0	0	0
0	0	0	0	0	0	0	0	0	0
0	0	0	0	0	0	0	0	0	0
0	0	0	0	0	0	0	0	0	0
0	0	0	0	0	0	0	0	0	0
0	0	0	0	0	0	0	0	0	0
0	0	0	0	0	0	0	0	0	0
0	0	0	0	0	0	0	0	0	0
0	0	0	0	0	0	0	0	0	0
0	0	0	0	0	0	0	0	0	0
0	0	0	0	0	0	0	0	0	0
0	0	0	0	0	0	0	0	0	0
0	0	0	0	0	0	0	0	0	0
0	0	0	0	0	0	0	0	0	0
0	0	0	0	0	0	0	0	0	0
0	0	0	0	0	0	0	0	0	0
0	0	0	0	0	0	0	0	0	0
0	0	0	0	0	0	0	0	0	0
0	0	0	0	0	0	0	0	0	0
0	0	0	0	0	0	0	0	0	0
0	0	0	0	0	0	0	0	0	0
0	0	0	0	0	0	0	0	0	0
0	0	0	0	0	0	0	0	0	0
0	0	0	0	0	0	0	0	0	0
0	0	0	0	0	0	0	0	0	0
0	0	0	0	0	0	0	0	0	0
0	0	0	0	0	0	0	0	0	0
0	0	0	0	0	0	0	0	0	0
0	0	0	0	0	0	0	0	0	0
0	0	0	0	0	0	0	0	0	0
0	0	0	0	0	0	0	0	0	0
0	0	0	0	0	0	0	0	0	0
0	0	0	0	0	0	0	0	0	0
0	0	0	0	0	0	0	0	0	0
0	0	0	0	0	0	0	0	0	0
0	0	0	0	0	0	0	0	0	0
0	0	0	0	0	0	0	0	0	0
0	0	0	0	0	0	0	0	0	0
0	0	0	0	0	0	0	0	0	0
0	0	0	0	0	0	0	0	0	0
0	0	0	0	0	0	0	0	0	0
0	0	0	0	0	0	0	0	0	0
0	0	0	0	0	0	0	0	0	0
0	0	0	0	0	0	0	0	0	0
0	0	0	0	0	0	0	0	0	0
0	0	0	0	0	0	0	0	0	0
0	0	0	0	0	0	0	0	0	0
0	0	0	0	0	0	0	0	0	0
0	0	0	0	0	0	0	0	0	0
0	0	0	0	0	0	0	0	0	0
0	0	0	0	0	0	0	0	0	0
0	0	0	0	0	0	0	0	0	0
0	0	0	0	0	0	0	0	0	0
0	0	0	0	0	0	0	0	0	0
0	0	0	0	0	0	0	0	0	0
0	0	0	0	0	0	0	0	0	0
0	0	0	0	0	0	0	0	0	0
0	0	0	0	0	0	0	0	0	0
0	0	0	0	0	0	0	0	0	0
0	0	0	0	0	0	0	0	0	0
0	0	0	0	0	0	0	0	0	0
0	0	0	0	0	0	0	0	0	0
0	0	0	0	0	0	0	0	0	0
0	0	0	0	0	0	0	0	0	0
0	0	0	0	0	0	0	0	0	0
0	0	0	0	0	0	0	0	0	0
0	0	0	0	0	0	0	0	0	0
0	0	0	0	0	0	0	0	0	0
0	0	0	0	0	0	0	0	0	0
0	0	0	0	0	0	0	0	0	0
0	0	0	0	0	0	0	0	0	0
0	0	0	0	0	0	0	0	0	0
0	0	0	0	0	0	0	0	0	0
0	0	0	0	0	0	0	0	0	0
0	0	0	0	0	0	0	0	0	0
0	0	0	0	0	0	0	0	0	0
0	0	0	0	0	0	0	0	0	0
0	0	0	0	0	0	0	0	0	0
0	0	0	0	0	0	0	0	0	0
0	0	0	0	0	0	0	0	0	0
0	0	0	0	0	0	0	0	0	0
0	0	0	0	0	0	0	0	0	0
0	0	0	0	0	0	0	0	0	0
0	0	0	0	0	0	0	0	0	0
0	0	0	0	0	0	0	0	0	0
0	0	0	0	0	0	0	0	0	0
0	0	0	0	0	0	0	0	0	0
0	0	0	0	0	0	0	0	0	0
0	0	0	0	0	0	0	0	0	0
0	0	0	0	0	0	0	0	0	0
0	0	0	0	0	0	0	0	0	0
0	0	0	0	0	0	0	0	0	0
0	0	0	0	0	0	0	0	0	0
0	0	0	0	0	0	0	0	0	0
0	0	0	0	0	0	0	0	0	0
0	0	0	0	0	0	0	0	0	0
0	0	0	0	0	0	0	0	0	0
0	0	0	0	0	0	0	0	0	0
0	0	0	0	0	0	0	0	0	0
0	0	0	0	0	0	0	0	0	0
0	0	0	0	0	0	0	0	0	0
0	0	0	0	0	0	0	0	0	0
0	0	0	0	0	0	0	0	0	0
0	0	0	0	0	0	0	0	0	0
0	0	0	0	0	0	0	0	0	0
0	0	0	0	0	0	0	0	0	0
0	0	0	0	0	0	0	0	0	0
0	0	0	0	0	0	0	0	0	0
0	0	0	0	0	0	0	0	0	0
0	0	0	0	0	0	0	0	0	0
0	0	0	0	0	0	0	0	0	0
0	0	0	0	0	0	0	0	0	0
0	0	0	0	0	0	0	0	0	0
0	0	0	0	0	0	0	0	0	0
0	0	0	0	0	0	0	0	0	0
0	0	0	0	0	0	0	0	0	0
0	0	0	0	0	0	0	0	0	0
0	0	0	0	0	0	0	0	0	0
0	0	0	0	0	0	0	0	0	0
0	0	0	0	0	0	0	0	0	0
0	0	0	0	0	0	0	0	0	0
0	0	0	0	0	0	0	0	0	0
0	0	0	0	0	0	0	0	0	0
0	0	0	0	0	0	0	0	0	0
0	0	0	0	0	0	0	0	0	0
0	0	0	0	0	0	0	0	0	0
0	0	0	0	0	0	0	0	0	0
0	0	0	0	0	0	0	0	0	0
0	0	0	0	0	0	0	0	0	0
0	0	0	0	0	0	0	0	0	0
0	0	0	0	0	0	0	0	0	0
0	0	0	0	0	0	0	0	0	0
0	0	0	0	0	0	0	0	0	0
0	0	0	0	0	0	0	0	0	0
0	0	0	0	0	0	0	0	0	0
0	0	0	0	0	0	0	0	0	0
0	0	0	0	0	0	0	0	0	0
0	0	0	0	0	0	0	0	0	0
0	0	0	0	0	0	0	0	0	0
0	0	0	0	0	0	0	0	0	0
0	0	0	0	0	0	0	0	0	0
0	0	0	0	0	0	0	0	0	0
0	0	0	0	0	0	0	0	0	0
0	0	0	0	0	0	0	0	0	0
0	0	0	0	0	0	0	0	0	0
0	0	0	0	0	0	0	0	0	0
0	0	0	0	0	0	0	0	0	0
0	0	0	0	0	0	0	0	0	0
0	0	0	0	0	0	0	0	0	0
0	0	0	0	0	0	0	0	0	0
0	0	0	0	0	0	0	0	0	0
0	0	0	0	0	0	0	0	0	0
0	0	0	0	0	0	0	0	0	0
0	0	0	0	0	0	0	0	0	0
0	0	0	0	0	0	0	0	0	0
0	0	0	0	0	0	0	0	0	0
0	0	0	0	0	0	0	0	0	0
0	0	0	0	0	0	0	0	0	0
0	0	0	0	0	0	0	0	0	0
0	0	0	0	0	0	0	0	0	0
0	0	0	0	0	0	0	0	0	0
0	0	0	0	0	0	0	0	0	0
0	0	0	0	0	0	0	0	0	0
0	0	0	0	0	0	0	0	0	0
0	0	0	0	0	0	0	0	0	0
0	0	0	0	0	0	0	0	0	0
0	0	0	0	0	0	0	0	0	0
0	0	0	0	0	0	0	0	0	0
0	0	0	0	0	0	0	0	0	0
0	0	0	0	0	0	0	0	0	0
0	0	0	0	0	0	0	0	0	0
0	0	0	0	0	0	0	0	0	0
0	0	0	0	0	0	0	0	0	0
0	0	0	0	0	0	0	0	0	0
0	0	0	0	0	0	0	0	0	0
0	0	0	0	0	0	0	0	0	0
0	0	0	0	0	0	0	0	0	0
0	0	0	0	0	0	0	0	0	0
0	0	0	0	0	0	0	0	0	0
0	0	0	0	0	0	0	0	0	0
0	0	0	0	0	0	0	0	0	0
0	0	0	0	0	0	0	0	0	0
0	0	0	0	0	0	0	0	0	0
0	0	0	0	0	0	0	0	0	0
0	0	0	0	0	0	0	0	0	0
0	0	0	0	0	0	0	0	0	0
0	0	0	0	0	0	0	0	0	0
0	0	0	0	0	0	0	0	0	0
0	0	0	0	0	0	0	0	0	0
0	0	0	0	0	0	0	0	0	0
0	0	0	0	0	0	0	0	0	0
0	0	0	0	0	0	0	0	0	0
0	0	0	0	0	0	0	0	0	0
0	0	0	0	0	0	0	0	0	0
0	0	0	0	0	0	0	0	0	0
0	0	0	0	0	0	0	0	0	0
0	0	0	0	0	0	0	0	0	0
0	0	0	0	0	0	0	0	0	0
0	0	0	0	0	0	0	0	0	0
0	0	0	0	0	0	0	0	0	0
0	0	0	0	0	0	0	0	0	0
0	0	0	0	0	0	0	0	0	0
0	0	0	0	0	0	0	0	0	0
0	0	0	0	0	0	0	0	0	0
0	0	0	0	0	0	0	0	0	0
0	0	0	0	0	0	0	0	0	0
0	0	0	0	0	0	0	0	0	0
0	0	0	0	0	0	0	0	0	0
0	0	0	0	0	0	0	0	0	0
0	0	0	0	0	0	0	0	0	0
0	0	0	0	0	0	0	0	0	0
0	0	0	0	0	0	0	0	0	0
0	0	0	0	0	0	0	0	0	0
0	0	0	0	0	0	0	0	0	0
0	0	0	0	0	0	0	0	0	0
0	0	0	0	0	0	0	0	0	0
0	0	0	0	0	0	0	0	0	0
0	0	0	0	0	0	0	0	0	0
0	0	0	0	0	0	0	0	0	0
0	0	0	0	0	0	0	0	0	0
0	0	0	0	0	0	0	0	0	0
0	0	0	0	0	0	0	0	0	0
0	0	0	0	0	0	0	0	0	0
0	0	0	0	0	0	0	0	0	0
0	0	0	0	0	0	0	0	0	0
0	0	0	0	0	0	0	0	0	0
0	0	0	0	0	0	0	0	0	0
0	0	0	0	0	0	0	0	0	0
0	0	0	0	0	0	0	0	0	0
0	0	0	0	0	0	0	0	0	0
0	0	0	0	0	0	0	0	0	0
0	0	0	0	0	0	0	0	0	0
0	0	0	0	0	0	0	0	0	0
0	0	0	0	0	0	0	0	0	0
0	0	0	0	0	0	0	0	0	0
0	0	0	0	0	0	0	0	0	0
0	0	0	0	0	0	0	0	0	0
0	0	0	0	0	0	0	0	0	0
0	0	0	0	0	0	0	0	0	0
0	0	0	0	0	0	0	0	0	0
0	0	0	0	0	0	0	0	0	0
0	0	0	0	0	0	0	0	0	0
0	0	0	0	0	0	0	0	0	0
0	0	0	0	0	0	0	0	0	0
0	0	0	0	0	0	0	0	0	0
0	0	0	0	0	0	0	0	0	0
0	0	0	0	0	0	0	0	0	0
0	0	0	0	0	0	0	0	0	0
0	0	0	0	0	0	0	0	0	0
0	0	0	0	0	0	0	0	0	0
0	0	0	0	0	0	0	0	0	0
0	0	0	0	0	0	0	0	0	0
0	0	0	0	0	0	0	0	0	0
0	0	0	0	0	0	0	0	0	0
0	0	0	0	0	0	0	0	0	0
0	0	0	0	0	0	0	0	0	0
0	0	0	0	0	0	0	0	0	0
0	0	0	0	0	0	0	0	0	0
0	0	0	0	0	0	0	0	0	0
0	0	0	0	0	0	0	0	0	0
0	0	0	0	0	0	0	0	0	0
0	0	0	0	0	0	0	0	0	0
0	0	0	0	0	0	0	0	0	0
0	0	0	0	0	0	0	0	0	0
0	0	0	0	0	0	0	0	0	0
0	0	0	0	0	0	0	0	0	0
0	0	0	0	0	0	0	0	0	0
0	0	0	0	0	0	0	0	0	0
0	0	0	0	0	0	0	0	0	0
0	0	0	0	0	0	0	0	0	0
0	0	0	0	0	0	0	0	0	0
0	0	0	0	0	0	0	0	0	0
0	0	0	0	0	0	0	0	0	0
0	0	0	0	0	0	0	0	0	0
0	0	0	0	0	0	0	0	0	0
0	0	0	0	0	0	0	0	0	0
0	0	0	0	0	0	0	0	0	0
0	0	0	0	0	0	0	0	0	0
0	0	0	0	0	0	0	0	0	0
0	0	0	0	0	0	0	0	0	0
0	0	0	0	0	0	0	0	0	0
0	0	0	0	0	0	0	0	0	0
0	0	0	0	0	0	0	0	0	0
0	0	0	0	0	0	0	0	0	0
0	0	0	0	0	0	0	0	0	0
0	0	0	0	0	0	0	0	0	0
0	0	0	0	0	0	0	0	0	0
0	0	0	0	0	0	0	0	0	0
0	0	0	0	0	0	0	0	0	0
0	0	0	0	0	0	0	0	0	0
0	0	0	0	0	0	0	0	0	0
0	0	0	0	0	0	0	0	0	0
0	0	0	0	0	0	0	0	0	0
0	0	0	0	0	0	0	0	0	0
0	0	0	0	0	0	0	0	0	0
0	0	0	0	0	0	0	0	0	0
0	0	0	0	0	0	0	0	0	0
0	0	0	0	0	0	0	0	0	0
0	0	0	0	0	0	0	0	0	0
0	0	0	0	0	0	0	0	0	0
0	0	0	0	0	0	0	0	0	0
0	0	0	0	0	0	0	0	0	0
0	0	0	0	0	0	0	0	0	0
0	0	0	0	0	0	0	0	0	0
0	0	0	0	0	0	0	0	0	0
0	0	0	0	0	0	0	0	0	0
0	0	0	0	0	0	0	0	0	0
0	0	0	0	0	0	0	0	0	0
0	0	0	0	0	0	0	0	0	0
0	0	0	0	0	0	0	0	0	0
0	0	0	0	0	0	0	0	0	0
0	0	0	0	0	0	0	0	0	0
0	0	0	0	0	0	0	0	0	0
0	0	0	0	0	0	0	0	0	0
0	0	0	0	0	0	0	0	0	0
0	0	0	0	0	0	0	0	0	0
0	0	0	0	0	0	0	0	0	0
0	0	0	0	0	0	0	0	0	0
0	0	0	0	0	0	0	0	0	0
0	0	0	0	0	0	0	0	0	0
0	0	0	0	0	0	0	0	0	0
0	0	0	0	0	0	0	0	0	0
0	0	0	0	0	0	0	0	0	0
0	0	0	0	0	0	0	0	0	0
0	0	0	0	0	0	0	0	0	0
0	0	0	0	0	0	0	0	0	0
0	0	0	0	0	0	0	0	0	0
0	0	0	0	0	0	0	0	0	0
0	0	0	0	0	0	0	0	0	0
0	0	0	0	0	0	0	0	0	0
0	0	0	0	0	0	0	0	0	0
0	0	0	0	0	0	0	0	0	0
0	0	0	0	0	0	0	0	0	0
0	0	0	0	0	0	0	0	0	0
0	0	0	0	0	0	0	0	0	0
0	0	0	0	0	0	0	0	0	0
0	0	0	0	0	0	0	0	0	0
0	0	0	0	0	0	0	0	0	0
0	0	0	0	0	0	0	0	0	0
0	0	0	0	0	0	0	0	0	0
0	0	0	0	0	0	0	0	0	0
0	0	0	0	0	0	0	0	0	0
0	0	0	0	0	0	0	0	0	0
0	0	0	0	0	0	0	0	0	0
0	0	0	0	0	0	0	0	0	0
0	0	0	0	0	0	0	0	0	0
0	0	0	0	0	0	0	0	0	0
0	0	0	0	0	0	0	0	0	0
0	0	0	0	0	0	0	0	0	0
0	0	0	0	0	0	0	0	0	0
0	0	0	0	0	0	0	0	0	0
0	0	0	0	0	0	0	0	0	0
0	0	0	0	0	0	0	0	0	0
0	0	0	0	0	0	0	0	0	0
0	0	0	0	0	0	0	0	0	0
0	0	0	0	0	0	0	0	0	0
0	0	0	0	0	0	0	0	0	0
0	0	0	0	0	0	0	0	0	0
0	0	0	0	0	0	0	0	0	0
0	0	0	0	0	0	0	0	0	0
0	0	0	0	0	0	0	0	0	0
0	0	0	0	0	0	0	0	0	0
0	0	0	0	0	0	0	0	0	0
0	0	0	0	0	0	0	0	0	0
0	0	0	0	0	0	0	0	0	0
0	0	0	0	0	0	0	0	0	0
0	0	0	0	0	0	0	0	0	0
0	0	0	0	0	0	0	0	0	0
0	0	0	0	0	0	0	0	0	0
0	0	0	0	0	0	0	0	0	0
0	0	0	0	0	0	0	0	0	0
0	0	0	0	0	0	0	0	0	0
0	0	0	0	0	0	0	0	0	0
0	0	0	0	0	0	0	0	0	0
0	0	0	0	0	0	0	0	0	0
0	0	0	0	0	0	0	0	0	0
0	0	0	0	0	0	0	0	0	0
0	0	0	0	0	0	0	0	0	0
0	0	0	0	0	0	0	0	0	0
0	0	0	0	0	0	0	0	0	0
0	0	0	0	0	0	0	0	0	0
0	0	0	0	0	0	0	0	0	0
0	0	0	0	0	0	0	0	0	0
0	0	0	0	0	0	0	0	0	0
0	0	0	0	0	0	0	0	0	0
0	0	0	0	0	0	0	0	0	0
0	0	0	0	0	0	0	0	0	0
0	0	0	0	0	0	0	0	0	0
0	0	0	0	0	0	0	0	0	0
0	0	0	0	0	0	0	0	0	0
0	0	0	0	0	0	0	0	0	0
0	0	0	0	0	0	0	0	0	0
0	0	0	0	0	0	0	0	0	0
0	0	0	0	0	0	0	0	0	0
0	0	0	0	0	0	0	0	0	0
0	0	0	0	0	0	0	0	0	0
0	0	0	0	0	0	0	0	0	0
0	0	0	0	0	0	0	0	0	0
0	0	0	0	0	0	0	0	0	0
0	0	0	0	0	0	0	0	0	0
0	0	0	0	0	0	0	0	0	0
0	0	0	0	0	0	0	0	0	0
0	0	0	0	0	0	0	0	0	0
0	0	0	0	0	0	0	0	0	0
0	0	0	0	0	0	0	0	0	0
0	0	0	0	0	0	0	0	0	0
0	0	0	0	0	0	0	0	0	0
0	0	0	0	0	0	0	0	0	0
0	0	0	0	0	0	0	0	0	0
0	0	0	0	0	0	0	0	0	0
0	0	0	0	0	0	0	0	0	0
0	0	0	0	0	0	0	0	0	0
0	0	0	0	0	0	0	0	0	0
0	0	0	0	0	0	0	0	0	0
0	0	0	0	0	0	0	0	0	0
0	0	0	0	0	0	0	0	0	0
0	0	0	0	0	0	0	0	0	0
0	0	0	0	0	0	0	0	0	0
0	0	0	0	0	0	0	0	0	0
0	0	0	0	0	0	0	0	0	0
0	0	0	0	0	0	0	0	0	0
0	0	0	0	0	0	0	0	0	0
0	0	0	0	0	0	0	0	0	0
0	0	0	0	0	0	0	0	0	0
0	0	0	0	0	0	0	0	0	0
0	0	0	0	0	0	0	0	0	0
0	0	0	0	0	0	0	0	0	0
0	0	0	0	0	0	0	0	0	0
0	0	0	0	0	0	0	0	0	0
0	0	0	0	0	0	0	0	0	0
0	0	0	0	0	0	0	0	0	0
0	0	0	0	0	0	0	0	0	0
0	0	0	0	0	0	0	0	0	0
0	0	0	0	0	0	0	0	0	0
0	0	0	0	0	0	0	0	0	0
0	0	0	0	0	0	0	0	0	0
0	0	0	0	0	0	0	0	0	0
0	0	0	0	0	0	0	0	0	0
0	0	0	0	0	0	0	0	0	0
0	0	0	0	0	0	0	0	0	0
0	0	0	0	0	0	0	0	0	0
0	0	0	0	0	0	0	0	0	0
0	0	0	0	0	0	0	0	0	0
0	0	0	0	0	0	0	0	0	0
0	0	0	0	0	0	0	0	0	0
0	0	0	0	0	0	0	0	0	0
0	0	0	0	0	0	0	0	0	0
0	0	0	0	0	0	0	0	0	0
0	0	0	0	0	0	0	0	0	0
0	0	0	0	0	0	0	0	0	0
0	0	0	0	0	0	0	0	0	0
0	0	0	0	0	0	0	0	0	0
0	0	0	0	0	0	0	0	0	0
0	0	0	0	0	0	0	0	0	0
0	0	0	0	0	0	0	0	0	0
0	0	0	0	0	0	0	0	0	0
0	0	0	0	0	0	0	0	0	0
0	0	0	0	0	0	0	0	0	0
0	0	0	0	0	0	0	0	0	0
0	0	0	0	0	0	0	0	0	0
0	0	0	0	0	0	0	0	0	0
0	0	0	0	0	0	0	0	0	0
0	0	0	0	0	0	0	0	0	0
0	0	0	0	0	0	0	0	0	0
0	0	0	0	0	0	0	0	0	0
0	0	0	0	0	0	0	0	0	0
0	0	0	0	0	0	0	0	0	0
0	0	0	0	0	0	0	0	0	0
0	0	0	0	0	0	0	0	0	0
0	0	0	0	0	0	0	0	0	0
0	0	0	0	0	0	0	0	0	0
0	0	0	0	0	0	0	0	0	0
0	0	0	0	0	0	0	0	0	0
0	0	0	0	0	0	0	0	0	0
0	0	0	0	0	0	0	0	0	0
0	0	0	0	0	0	0	0	0	0
0	0	0	0	0	0	0	0	0	0
0	0	0	0	0	0	0	0	0	0
0	0	0	0	0	0	0	0	0	0
0	0	0	0	0	0	0	0	0	0
0	0	0	0	0	0	0	0	0	0
0	0	0	0	0	0	0	0	0	0
0	0	0	0	0	0	0	0	0	0
0	0	0	0	0	0	0	0	0	0
0	0	0	0	0	0	0	0	0	0
0	0	0	0	0	0	0	0	0	0
0	0	0	0	0	0	0	0	0	0
0	0	0	0	0	0	0	0	0	0
0	0	0	0	0	0	0	0	0	0
0	0	0	0	0	0	0	0	0	0
0	0	0	0	0	0	0	0	0	0
0	0	0	0	0	0	0	0	0	0
0	0	0	0	0	0	0	0	0	0
0	0	0	0	0	0	0	0	0	0
0	0	0	0	0	0	0	0	0	0
0	0	0	0	0	0	0	0	0	0
0	0	0	0	0	0	0	0	0	0
0	0	0	0	0	0	0	0	0	0
0	0	0	0	0	0	0	0	0	0
0	0	0	0	0	0	0	0	0	0
0	0	0	0	0	0	0	0	0	0
0	0	0	0	0	0	0	0	0	0
0	0	0	0	0	0	0	0	0	0
0	0	0	0	0	0	0	0	0	0
0	0	0	0	0	0	0	0	0	0
0	0	0	0	0	0	0	0	0	0
0	0	0	0	0	0	0	0	0	0
0	0	0	0	0	0	0	0	0	0
0	0	0	0	0	0	0	0	0	0
0	0	0	0	0	0	0	0	0	0
0	0	0	0	0	0	0	0	0	0
0	0	0	0	0	0	0	0	0	0
0	0	0	0	0	0	0	0	0	0
0	0	0	0	0	0	0	0	0	0
0	0	0	0	0	0	0	0	0	0
0	0	0	0	0	0	0	0	0	0
0	0	0	0	0	0	0	0	0	0
0	0	0	0	0	0	0	0	0	0
0	0	0	0	0	0	0	0	0	0
0	0	0	0	0	0	0	0	0	0
0	0	0	0	0	0	0	0	0	0
0	0	0	0	0	0	0	0	0	0
0	0	0	0	0	0	0	0	0	0
0	0	0	0	0	0	0	0	0	0
0	0	0	0	0	0	0	0	0	0
0	0	0	0	0	0	0	0	0	0
0	0	0	0	0	0	0	0	0	0
0	0	0	0	0	0	0	0	0	0
0	0	0	0	0	0	0	0	0	0
0	0	0	0	0	0	0	0	0	0
0	0	0	0	0	0	0	0	0	0
0	0	0	0	0	0	0	0	0	0
0	0	0	0	0	0	0	0	0	0
0	0	0	0	0	0	0	0	0	0
0	0	0	0	0	0	0	0	0	0
0	0	0	0	0	0	0	0	0	0
0	0	0	0	0	0	0	0	0	0
0	0	0	0	0	0	0	0	0	0
0	0	0	0	0	0	0	0	0	0
0	0	0	0	0	0	0	0	0	0
0	0	0	0	0	0	0	0	0	0
0	0	0	0	0	0	0	0	0	0
0	0	0	0	0	0	0	0	0	0
0	0	0	0	0	0	0	0	0	0
0	0	0	0	0	0	0	0	0	0
0	0	0	0	0	0	0	0	0	0
0	0	0	0	0	0	0	0	0	0
0	0	0	0	0	0	0	0	0	0
0	0	0	0	0	0	0	0	0	0
0	0	0	0	0	0	0	0	0	0
0	0	0	0	0	0	0	0	0	0
0	0	0	0	0	0	0	0	0	0
0	0	0	0	0	0	0	0	0	0
0	0	0	0	0	0	0	0	0	0
0	0	0	0	0	0	0	0	0	0
0	0	0	0	0	0	0	0	0	0
0	0	0	0	0	0	0	0	0	0
0	0	0	0	0	0	0	0	0	0
0	0	0	0	0	0	0	0	0	0
0	0	0	0	0	0	0	0	0	0
0	0	0	0	0	0	0	0	0	0
0	0	0	0	0	0	0	0	0	0
0	0	0	0	0	0	0	0	0	0
0	0	0	0	0	0	0	0	0	0
0	0	0	0	0	0	0	0	0	0
0	0	0	0	0	0	0	0	0	0
0	0	0	0	0	0	0	0	0	0
0	0	0	0	0	0	0	0	0	0
0	0	0	0	0	0	0	0	0	0
0	0	0	0	0	0	0	0	0	0
0	0	0	0	0	0	0	0	0	0
0	0	0	0	0	0	0	0	0	0
0	0	0	0	0	0	0	0	0	0
0	0	0	0	0	0	0	0	0	0
0	0	0	0	0	0	0	0	0	0
0	0	0	0	0	0	0	0	0	0
0	0	0	0	0	0	0	0	0	0
0	0	0	0	0	0	0	0	0	0
0	0	0	0	0	0	0	0	0	0
0	0	0	0	0	0	0	0	0	0
0	0	0	0	0	0	0	0	0	0
0	0	0	0	0	0	0	0	0	0
0	0	0	0	0	0	0	0	0	0
0	0	0	0	0	0	0	0	0	0
0	0	0	0	0	0	0	0	0	0
0	0	0	0	0	0	0	0	0	0
0	0	0	0	0	0	0	0	0	0
0	0	0	0	0	0	0	0	0	0
0	0	0	0	0	0	0	0	0	0
0	0	0	0	0	0	0	0	0	0
0	0	0	0	0	0	0	0	0	0
0	0	0	0	0	0	0	0	0	0
0	0	0	0	0	0	0	0	0	0
0	0	0	0	0	0	0	0	0	0
0	0	0	0	0	0	0	0	0	0
0	0	0	0	0	0	0	0	0	0
0	0	0	0	0	0	0	0	0	0
0	0	0	0	0	0	0	0	0	0
0	0	0	0	0	0	0	0	0	0
0	0	0	0	0	0	0	0	0	0
0	0	0	0	0	0	0	0	0	0
0	0	0	0	0	0	0	0	0	0
0	0	0	0	0	0	0	0	0	0
0	0	0	0	0	0	0	0	0	0
0	0	0	0	0	0	0	0	0	0
0	0	0	0	0	0	0	0	0	0
0	0	0	0	0	0	0	0	0	0
0	0	0	0	0	0	0	0	0	0
0	0	0	0	0	0	0	0	0	0
0	0	0	0	0	0	0	0	0	0
0	0	0	0	0	0	0	0	0	0
0	0	0	0	0	0	0	0	0	0
0	0	0	0	0	0	0	0	0	0
0	0	0	0	0	0	0	0	0	0
0	0	0	0	0	0	0	0	0	0
0	0	0	0	0	0	0	0	0	0
0	0	0	0	0	0	0	0	0	0
0	0	0	0	0	0	0	0	0	0
0	0	0	0	0	0	0	0	0	0
0	0	0	0	0	0	0	0	0	0
0	0	0	0	0	0	0	0	0	0
0	0	0	0	0	0	0	0	0	0
0	0	0	0	0	0	0	0	0	0
0	0	0	0	0	0	0	0	0	0
0	0	0	0	0	0	0	0	0	0
0	0	0	0	0	0	0	0	0	0
0	0	0	0	0	0	0	0	0	0
0	0	0	0	0	0	0	0	0	0
0	0	0	0	0	0	0	0	0	0
0	0	0	0	0	0	0	0	0	0
0	0	0	0	0	0	0	0	0	0
0	0	0	0	0	0	0	0	0	0
0	0	0	0	0	0	0	0	0	0
0	0	0	0	0	0	0	0	0	0
0	0	0	0	0	0	0	0	0	0
0	0	0	0	0	0	0	0	0	0
0	0	0	0	0	0	0	0	0	0
0	0	0	0	0	0	0	0	0	0
0	0	0	0	0	0	0	0	0	0
0	0	0	0	0	0	0	0	0	0
0	0	0	0	0	0	0	0	0	0
0	0	0	0	0	0	0	0	0	0
0	0	0	0	0	0	0	0	0	0
0	0	0	0	0	0	0	0	0	0
0	0	0	0	0	0	0	0	0	0
0	0	0	0	0	0	0	0	0	0
0	0	0	0	0	0	0	0	0	0
0	0	0	0	0	0	0	0	0	0
0	0	0	0	0	0	0	0	0	0
0	0	0	0	0	0	0	0	0	0
0	0	0	0	0	0	0	0	0	0
0	0	0	0	0	0	0	0	0	0
0	0	0	0	0	0	0	0	0	0
0	0	0	0	0	0	0	0	0	0
0	0	0	0	0	0	0	0	0	0
0	0	0	0	0	0	0	0	0	0
0	0	0	0	0	0	0	0	0	0
0	0	0	0	0	0	0	0	0	0
0	0	0	0	0	0	0	0	0	0
0	0	0	0	0	0	0	0	0	0
0	0	0	0	0	0	0	0	0	0
0	0	0	0	0	0	0	0	0	0
0	0	0	0	0	0	0	0	0	0
0	0	0	0	0	0	0	0	0	0
0	0	0	0	0	0	0	0	0	0
0	0	0	0	0	0	0	0	0	0
0	0	0	0	0	0	0	0	0	0
0	0	0	0	0	0	0	0	0	0
0	0	0	0	0	0	0	0	0	0
0	0	0	0	0	0	0	0	0	0
0	0	0	0	0	0	0	0	0	0
0	0	0	0	0	0	0	0	0	0
0	0	0	0	0	0	0	0	0	0
0	0	0	0	0	0	0	0	0	0
0	0	0	0	0	0	0	0	0	0
0	0	0	0	0	0	0	0	0	0
0	0	0	0	0	0	0	0	0	0
0	0	0	0	0	0	0	0	0	0
0	0	0	0	0	0	0	0	0	0
0	0	0	0	0	0	0	0	0	0
0	0	0	0	0	0	0	0	0	0
0	0	0	0	0	0	0	0	0	0
0	0	0	0	0	0	0	0	0	0
0	0	0	0	0	0	0	0	0	0
0	0	0	0	0	0	0	0	0	0
0	0	0	0	0	0	0	0	0	0
0	0	0	0	0	0	0	0	0	0
0	0	0	0	0	0	0	0	0	0
0	0	0	0	0	0	0	0	0	0
0	0	0	0	0	0	0	0	0	0
0	0	0	0	0	0	0	0	0	0
0	0	0	0	0	0	0	0	0	0
0	0	0	0	0	0	0	0	0	0
0	0	0	0	0	0	0	0	0	0
0	0	0	0	0	0	0	0	0	0
0	0	0	0	0	0	0	0	0	0
0	0	0	0	0	0	0	0	0	0
0	0	0	0	0	0	0	0	0	0
0	0	0	0	0	0	0	0	0	0
0	0	0	0	0	0	0	0	0	0
0	0	0	0	0	0	0	0	0	0
0	0	0	0	0	0	0	0	0	0
0	0	0	0	0	0	0	0	0	0
0	0	0	0	0	0	0	0	0	0
0	0	0	0	0	0	0	0	0	0
0	0	0	0	0	0	0	0	0	0
0	0	0	0	0	0	0	0	0	0
0	0	0	0	0	0	0	0	0	0
0	0	0	0	0	0	0	0	0	0
0	0	0	0	0	0	0	0	0	0
0	0	0	0	0	0	0	0	0	0
0	0	0	0	0	0	0	0	0	0
0	0	0	0	0	0	0	0	0	0
0	0	0	0	0	0	0	0	0	0
0	0	0	0	0	0	0	0	0	0
0	0	0	0	0	0	0	0	0	0
0	0	0	0	0	0	0	0	0	0
0	0	0	0	0	0	0	0	0	0
0	0	0	0	0	0	0	0	0	0
0	0	0	0	0	0	0	0	0	0
0	0	0	0	0	0	0	0	0	0
0	0	0	0	0	0	0	0	0	0
0	0	0	0	0	0	0	0	0	0
0	0	0	0	0	0	0	0	0	0
0	0	0	0	0	0	0	0	0	0
0	0	0	0	0	0	0	0	0	0
0	0	0	0	0	0	0	0	0	0
0	0	0	0	0	0	0	0	0	0
0	0	0	0	0	0	0	0	0	0
0	0	0	0	0	0	0	0	0	0
0	0	0	0	0	0	0	0	0	0
0	0	0	0	0	0	0	0	0	0
0	0	0	0	0	0	0	0	0	0
0	0	0	0	0	0	0	0	0	0
0	0	0	0	0	0	0	0	0	0
0	0	0	0	0	0	0	0	0	0
0	0	0	0	0	0	0	0	0	0
0	0	0	0	0	0	0	0	0	0
0	0	0	0	0	0	0	0	0	0
0	0	0	0	0	0	0	0	0	0
0	0	0	0	0	0	0	0	0	0
0	0	0	0	0	0	0	0	0	0
0	0	0	0	0	0	0	0	0	0
0	0	0	0	0	0	0	0	0	0
0	0	0	0	0	0	0	0	0	0
0	0	0	0	0	0	0	0	0	0
0	0	0	0	0	0	0	0	0	0
0	0	0	0	0	0	0	0	0	0
0	0	0	0	0	0	0	0	0	0
0	0	0	0	0	0	0	0	0	0
0	0	0	0	0	0	0	0	0	0
0	0	0	0	0	0	0	0	0	0
0	0	0	0	0	0	0	0	0	0
0	0	0	0	0	0	0	0	0	0
0	0	0	0	0	0	0	0	0	0
0	0	0	0	0	0	0	0	0	0
0	0	0	0	0	0	0	0	0	0
0	0	0	0	0	0	0	0	0	0
0	0	0	0	0	0	0	0	0	0
0	0	0	0	0	0	0	0	0	0
0	0	0	0	0	0	0	0	0	0
0	0	0	0	0	0	0	0	0	0
0	0	0	0	0	0	0	0	0	0
0	0	0	0	0	0	0	0	0	0
0	0	0	0	0	0	0	0	0	0
0	0	0	0	0	0	0	0	0	0
0	0	0	0	0	0	0	0	0	0
0	0	0	0	0	0	0	0	0	0
0	0	0	0	0	0	0	0	0	0
0	0	0	0	0	0	0	0	0	0
0	0	0	0	0	0	0	0	0	0
0	0	0	0	0	0	0	0	0	0
0	0	0	0	0	0	0	0	0	0
0	0	0	0	0	0	0	0	0	0
0	0	0	0	0	0	0	0	0	0
0	0	0	0	0	0	0	0	0	0
0	0	0	0	0	0	0	0	0	0
0	0	0	0	0	0	0	0	0	0
0	0	0	0	0	0	0	0	0	0
0	0	0	0	0	0	0	0	0	0
0	0	0	0	0	0	0	0	0	0
0	0	0	0	0	0	0	0	0	0
0	0	0	0	0	0	0	0	0	0
0	0	0	0	0	0	0	0	0	0
0	0	0	0	0	0	0	0	0	0
0	0	0	0	0	0	0	0	0	0
0	0	0	0	0	0	0	0	0	0
0	0	0	0	0	0	0	0	0	0
0	0	0	0	0	0	0	0	0	0
0	0	0	0	0	0	0	0	0	0
0	0	0	0	0	0	0	0	0	0
0	0	0	0	0	0	0	0	0	0
0	0	0	0	0	0	0	0	0	0
0	0	0	0	0	0	0	0	0	0
0	0	0	0	0	0	0	0	0	0
0	0	0	0	0	0	0	0	0	0
0	0	0	0	0	0	0	0	0	0
0	0	0	0	0	0	0	0	0	0
0	0	0	0	0	0	0	0	0	0
0	0	0	0	0	0	0	0	0	0
0	0	0	0	0	0	0	0	0	0
0	0	0	0	0	0	0	0	0	0
0	0	0	0	0	0	0	0	0	0
0	0	0	0	0	0	0	0	0	0
0	0	0	0	0	0	0	0	0	0
0	0	0	0	0	0	0	0	0	0
0	0	0	0	0	0	0	0	0	0
0	0	0	0	0	0	0	0	0	0
0	0	0	0	0	0	0	0	0	0
0	0	0	0	0	0	0	0	0	0
0	0	0	0	0	0	0	0	0	0
0	0	0	0	0	0	0	0	0	0
0	0	0	0	0	0	0	0	0	0
0	0	0	0	0	0	0	0	0	0
0	0	0	0	0	0	0	0	0	0
0	0	0	0	0	0	0	0	0	0
0	0	0	0	0	0	0	0	0	0
0	0	0	0	0	0	0	0	0	0
0	0	0	0	0	0	0	0	0	0
0	0	0	0	0	0	0	0	0	0
0	0	0	0	0	0	0	0	0	0
0	0	0	0	0	0	0	0	0	0
0	0	0	0	0	0	0	0	0	0
0	0	0	0	0	0	0	0	0	0
0	0	0	0	0	0	0	0	0	0
0	0	0	0	0	0	0	0	0	0
0	0	0	0	0	0	0	0	0	0
0	0	0	0	0	0	0	0	0	0
0	0	0	0	0	0	0	0	0	0
0	0	0	0	0	0	0	0	0	0
0	0	0	0	0	0	0	0	0	0
0	0	0	0	0	0	0	0	0	0
0	0	0	0	0	0	0	0	0	0
0	0	0	0	0	0	0	0	0	0
0	0	0	0	0	0	0	0	0	0
0	0	0	0	0	0	0	0	0	0
0	0	0	0	0	0	0	0	0	0
0	0	0	0	0	0	0	0	0	0
0	0	0	0	0	0	0	0	0	0
0	0	0	0	0	0	0	0	0	0
0	0	0	0	0	0	0	0	0	0
0	0	0	0	0	0	0	0	0	0
0	0	0	0	0	0	0	0	0	0
0	0	0	0	0	0	0	0	0	0
0	0	0	0	0	0	0	0	0	0
0	0	0	0	0	0	0	0	0	0
0	0	0	0	0	0	0	0	0	0
0	0	0	0	0	0	0	0	0	0
0	0	0	0	0	0	0	0	0	0
0	0	0	0	0	0	0	0	0	0
0	0	0	0	0	0	0	0	0	0
0	0	0	0	0	0	0	0	0	0
0	0	0	0	0	0	0	0	0	0
0	0	0	0	0	0	0	0	0	0
0	0	0	0	0	0	0	0	0	0
0	0	0	0	0	0	0	0	0	0
0	0	0	0	0	0	0	0	0	0
0	0	0	0	0	0	0	0	0	0
0	0	0	0	0	0	0	0	0	0
0	0	0	0	0	0	0	0	0	0
0	0	0	0	0	0	0	0	0	0
0	0	0	0	0	0	0	0	0	0
0	0	0	0	0	0	0	0	0	0
0	0	0	0	0	0	0	0	0	0
0	0	0	0	0	0	0	0	0	0
0	0	0	0	0	0	0	0	0	0
0	0	0	0	0	0	0	0	0	0
0	0	0	0	0	0	0	0	0	0
0	0	0	0	0	0	0	0	0	0
0	0	0	0	0	0	0	0	0	0
0	0	0	0	0	0	0	0	0	0
0	0	0	0	0	0	0	0	0	0
0	0	0	0	0	0	0	0	0	0
0	0	0	0	0	0	0	0	0	0
0	0	0	0	0	0	0	0	0	0
0	0	0	0	0	0	0	0	0	0
0	0	0	0	0	0	0	0	0	0
0	0	0	0	0	0	0	0	0	0
0	0	0	0	0	0	0	0	0	0
0	0	0	0	0	0	0	0	0	0
0	0	0	0	0	0	0	0	0	0
0	0	0	0	0	0	0	0	0	0
0	0	0	0	0	0	0	0	0	0
0	0	0	0	0	0	0	0	0	0
0	0	0	0	0	0	0	0	0	0
0	0	0	0	0	0	0	0	0	0
0	0	0	0	0	0	0	0	0	0
0	0	0	0	0	0	0	0	0	0
0	0	0	0	0	0	0	0	0	0

## Sheet: qlearn
0	0	0	0	0	0	0	0	0	0
0	0	0	0	0	0	0	0	1	0
0	0	0	0	0	0	0	0	0	0
0	0	0	0	0	0	0	0	0	0
0	0	0	0	0	0	0	0	0	0
0	0	0	0	0	0	0	0	0	0
0	0	0	0	0	0	0	0	0	0
0	0	0	0	0	0	0	0	0	0
0	0	0	0	0	0	0	0	0	0
0	0	0	0	0	0	0	0	0	0
0	0	0	0	0	0	0	0	0	0
0	0	0	0	0	0	0	0	0	0
0	0	0	0	0	0	0	0	0	0
0	0	0	0	0	0	0	0	0	0
0	0	0	0	0	0	0	0	0	0
0	0	0	0	0	0	0	0	0	0
0	0	0	0	0	0	0	0	0	0
0	0	1	0	0	0	0	1	0	0
0	0	0	0	0	0	0	0	0	0
0	0	0	0	0	0	0	0	0	0
0	0	0	0	0	0	0	0	0	0
0	0	0	0	0	0	0	0	0	0
0	0	0	0	0	0	0	0	0	0
0	0	0	0	0	0	0	0	0	0
0	0	0	0	0	0	0	0	0	0
0	0	0	0	0	0	0	0	0	0
0	0	0	0	0	0	0	0	0	0
0	0	0	0	0	0	0	0	0	0
0	0	0	0	0	0	0	0	0	0
0	0	0	0	0	0	0	0	0	0
0	0	0	0	0	0	0	0	0	0
0	0	0	0	0	0	0	0	0	0
0	0	0	0	1	1	0	0	0	0
0	0	0	0	0	0	0	0	0	0
0	0	0	0	0	0	0	0	0	0
0	0	0	0	0	0	0	0	0	0
0	0	0	0	1	0	0	0	0	0
0	0	0	0	0	0	0	0	0	0
0	0	0	0	0	0	0	0	0	0
0	0	0	0	0	0	0	0	0	0
0	0	0	0	0	0	1	0	0	0
0	0	0	0	0	0	0	0	0	0
0	0	0	0	0	0	0	0	0	0
0	0	0	0	0	0	0	0	0	0
0	0	0	0	0	0	0	0	0	0
0	0	0	0	0	0	0	0	0	0
0	0	0	0	0	0	0	0	0	0
0	0	0	0	0	0	0	0	0	0
0	0	0	0	0	0	0	0	0	0
0	0	0	0	0	0	0	0	0	0
0	0	0	0	0	0	0	0	0	0
0	0	0	0	0	0	0	0	1	0
0	0	0	0	0	0	0	0	0	0
0	0	0	0	0	0	0	0	0	0
0	0	0	0	0	0	0	0	0	0
0	0	0	0	0	0	0	0	0	0
0	0	0	0	0	0	0	0	0	0
0	0	0	0	0	0	0	0	0	0
0	0	0	0	0	0	0	0	0	0
0	0	0	0	0	0	0	0	0	0
0	0	0	0	0	0	0	0	0	0
0	0	0	0	0	0	0	0	0	0
0	0	0	0	0	0	0	0	0	0
0	0	0	0	0	0	0	0	0	0
0	0	0	0	0	0	0	0	0	0
0	0	0	0	0	0	0	0	0	0
0	0	0	0	0	0	0	0	0	0
0	0	0	0	0	0	0	0	0	0
0	0	1	0	0	0	0	0	0	0
0	0	1	0	0	0	0	0	0	0
0	0	0	0	0	0	0	0	0	0
0	0	0	0	0	0	0	0	0	0
0	0	0	0	0	0	0	0	0	0
0	0	0	0	0	0	0	0	0	0
0	0	0	0	0	0	0	0	0	0
0	0	0	0	0	0	0	0	0	0
0	0	0	0	0	0	0	0	0	0
0	0	0	0	0	0	0	0	0	0
0	0	0	0	0	0	0	0	0	0
0	0	0	0	0	0	0	0	0	0
0	0	0	0	0	0	0	0	0	0
0	0	0	0	0	0	0	0	0	0
0	0	0	0	0	0	0	0	0	0
0	0	0	0	1	0	0	0	0	0
0	0	0	0	0	0	0	0	0	0
0	0	0	0	0	0	0	0	0	0
0	0	0	0	0	0	0	0	0	0
0	0	0	0	0	0	0	0	0	0
0	0	0	0	0	0	0	0	0	0
0	0	0	0	0	0	0	0	0	0
0	0	0	0	0	0	0	0	0	0
0	0	0	0	0	0	0	0	0	0
0	0	1	0	0	0	0	0	0	0
0	0	0	0	0	0	1	0	0	0
0	0	0	0	0	0	0	0	0	0
0	0	0	0	0	0	0	0	0	0
0	0	0	0	0	0	0	0	0	0
0	0	0	0	0	0	0	0	0	0
0	0	0	0	0	0	0	0	0	0
1	0	0	0	0	0	0	1	0	0
0	0	0	0	0	0	0	0	0	0
0	0	0	0	0	0	0	0	0	0
0	0	0	0	0	0	0	0	0	0
0	0	0	0	0	0	0	0	0	0
0	0	0	0	0	1	0	0	0	0
0	0	0	0	0	0	0	0	0	0
0	0	0	0	1	0	0	0	0	0
0	0	0	0	0	0	0	0	0	0
0	0	0	0	0	0	0	0	0	0
0	0	0	0	0	0	0	0	0	0
0	0	0	0	0	0	0	0	0	0
0	0	0	0	0	0	0	0	0	0
0	0	0	0	0	1	0	0	0	0
0	0	0	0	0	0	0	0	0	0
0	0	1	0	0	0	0	0	0	0
0	0	0	0	0	0	0	0	0	0
0	0	0	0	0	0	0	0	0	0
0	0	0	0	0	0	0	0	0	0
0	0	0	0	0	0	0	0	0	0
0	0	0	0	0	0	0	0	0	0
0	0	0	0	0	0	0	0	0	0
0	0	0	0	0	0	0	0	0	0
0	0	0	0	0	0	0	0	0	0
0	0	0	0	0	0	0	0	0	0
0	0	0	0	0	0	0	0	0	0
0	0	0	0	0	0	0	0	0	0
0	0	0	0	0	0	0	0	0	0
0	0	0	0	0	0	0	0	0	0
0	0	0	0	0	0	0	0	0	0
0	0	0	0	0	0	0	0	0	0
0	0	0	0	0	0	0	0	0	0
0	0	0	0	0	0	0	0	0	0
0	0	0	0	0	0	0	0	0	0
0	0	0	0	0	0	0	0	0	0
0	0	0	1	0	0	0	0	0	0
0	0	0	0	0	0	0	0	0	0
0	0	0	0	0	0	0	0	0	0
0	0	0	0	0	0	0	0	0	0
0	0	0	0	0	0	0	0	0	0
0	0	0	0	0	0	0	0	0	0
0	0	0	0	0	0	0	0	0	0
0	0	0	0	0	0	0	0	0	0
0	0	0	0	0	0	0	0	0	0
0	0	0	0	0	0	0	0	0	0
0	0	0	0	0	0	0	0	0	0
0	0	0	0	0	0	0	0	0	0
0	0	1	0	0	0	0	0	0	0
0	0	0	0	0	0	0	0	0	0
0	0	0	0	0	0	0	0	0	0
0	0	0	0	0	0	0	0	0	0
0	0	0	0	0	0	0	0	0	0
0	0	0	0	0	0	0	0	0	0
0	0	0	0	0	0	0	0	0	0
0	0	0	0	0	0	0	0	0	0
0	0	0	0	0	0	0	0	0	0
0	0	0	0	0	0	0	0	0	0
0	0	0	0	0	0	0	0	0	0
0	0	0	0	0	0	0	0	0	0
0	0	0	0	0	0	0	0	0	0
0	0	0	0	0	0	0	0	0	0
0	0	0	0	0	1	0	0	0	0
0	0	0	0	0	0	0	0	0	0
0	0	0	0	0	0	0	0	0	0
0	0	0	0	0	0	0	0	0	0
0	0	0	0	0	0	0	0	0	0
0	0	0	0	0	0	0	0	0	0
0	0	0	0	0	0	0	0	1	0
0	0	0	0	0	0	0	0	0	0
0	0	1	0	0	0	0	0	0	0
0	0	0	0	0	0	0	0	0	0
0	0	0	0	0	0	0	0	0	0
0	0	0	0	0	0	0	0	0	0
0	0	0	0	1	0	0	0	0	0
0	0	0	0	0	0	0	0	0	0
0	0	0	0	0	0	0	0	0	0
0	0	0	0	0	1	0	0	1	0
0	0	0	0	0	0	0	0	0	0
0	0	0	0	0	0	0	0	0	0
0	0	0	0	0	0	0	0	0	0
0	0	0	0	0	0	0	0	0	0
0	0	1	0	0	0	0	0	0	0
0	0	0	0	0	0	0	0	0	0
0	0	0	0	0	0	0	0	0	0
0	0	0	0	0	0	0	0	0	0
0	0	0	0	0	0	0	0	0	0
0	0	0	0	0	0	0	0	0	0
0	0	0	0	0	0	0	0	0	0
0	0	0	0	0	0	0	0	0	0
0	0	0	0	0	0	0	0	0	0
0	0	0	0	0	0	0	0	0	0
0	0	0	0	0	0	0	0	0	0
0	0	0	0	0	0	0	0	0	0
0	0	0	0	0	0	0	0	0	0
0	0	0	0	0	0	0	0	0	0
0	0	0	0	0	0	0	0	0	0
0	0	0	0	0	0	0	0	0	0
0	0	0	0	0	0	0	0	0	0
0	0	0	0	0	0	0	0	0	0
0	0	0	0	0	0	0	0	0	0
0	0	0	0	0	0	0	0	0	0
1	0	0	0	0	0	0	0	0	0
0	0	0	0	0	0	0	0	0	0
0	0	0	0	0	0	1	0	0	0
0	0	0	0	0	0	0	0	0	0
0	0	0	0	0	0	0	0	0	0
0	0	0	0	0	0	0	0	0	0
0	0	0	0	0	0	0	0	0	0
0	0	0	0	0	0	0	0	0	0
0	0	0	0	0	0	0	0	0	0
0	1	0	0	0	0	0	0	0	0
0	0	0	0	0	0	0	0	0	0
0	0	0	0	0	0	0	0	0	0
0	0	0	0	0	0	0	0	0	0
0	0	0	0	0	0	0	0	0	0
0	0	0	0	0	0	0	0	1	0
0	0	0	0	0	0	0	0	1	0
0	0	0	0	0	0	0	0	0	0
0	0	0	0	0	0	0	0	0	0
0	0	0	0	0	0	0	0	0	0
0	0	0	0	0	0	0	0	0	0
0	0	0	0	0	0	0	0	0	0
0	0	0	0	0	0	0	0	0	0
0	0	0	0	0	0	0	0	0	0
0	0	0	0	1	0	0	0	0	0
0	0	0	0	0	0	0	0	0	0
0	0	0	0	0	0	0	0	0	0
0	0	0	0	0	0	0	0	0	0
0	0	0	0	0	0	0	0	0	0
0	0	0	0	0	0	0	0	0	0
0	0	0	0	0	0	0	0	0	0
0	0	0	0	0	0	0	0	0	0
0	0	0	0	0	0	0	0	0	0
0	0	0	0	0	0	0	0	0	0
0	0	0	0	0	0	0	0	0	0
0	0	0	0	0	0	0	0	0	0
0	0	0	0	0	0	0	0	0	0
0	0	0	0	0	0	0	0	0	0
0	0	0	0	0	0	0	0	0	0
0	0	0	0	0	0	0	0	0	0
0	0	0	0	0	0	0	0	0	0
0	0	0	0	0	0	0	0	0	0
0	0	0	0	0	0	0	0	0	0
0	0	0	0	0	0	0	0	0	0
0	0	0	0	0	0	0	0	0	0
0	0	0	0	0	0	0	0	0	0
0	0	0	0	0	0	0	0	0	0
0	0	0	0	0	0	0	0	0	0
0	0	0	0	0	0	0	0	0	0
0	0	0	0	0	0	0	0	0	0
0	0	0	0	0	0	0	0	0	0
0	0	0	0	0	0	0	0	0	0
0	0	0	0	0	0	0	0	0	0
0	0	0	0	0	0	0	0	0	0
0	0	0	0	0	0	0	0	0	0
0	0	0	0	0	0	0	0	0	0
0	1	0	0	0	0	0	1	0	0
0	0	0	0	0	0	0	0	0	0
0	0	0	0	0	0	0	0	1	0
0	0	0	0	0	0	0	0	0	0
0	0	0	0	0	0	0	0	0	0
0	0	0	0	0	0	0	0	0	0
0	0	0	0	0	0	0	0	0	0
0	0	0	0	0	0	0	0	0	0
0	0	0	0	0	0	0	0	0	0
0	0	0	0	0	0	0	0	1	0
0	0	0	0	0	0	0	0	0	0
0	0	0	0	0	0	0	0	0	0
0	0	0	0	0	0	0	0	0	0
0	0	0	0	0	0	0	0	0	0
0	0	0	0	0	1	0	0	0	0
0	0	0	0	0	0	0	0	0	0
0	0	0	0	0	0	0	0	0	0
0	0	0	0	0	0	0	0	0	0
0	0	0	0	0	0	0	0	0	0
0	0	0	0	0	0	0	0	0	0
0	0	0	0	0	0	0	0	0	0
0	0	0	0	0	0	0	0	0	0
0	0	0	0	0	0	0	0	0	0
0	0	0	0	0	0	0	0	0	0
0	0	0	0	0	0	0	0	0	0
0	0	0	0	0	0	0	0	0	0
0	0	0	0	0	0	0	0	0	0
0	0	0	0	0	0	1	0	0	0
0	0	0	1	0	0	0	0	0	0
0	0	0	0	0	0	0	0	0	0
0	0	0	0	0	0	0	0	0	0
0	0	0	0	0	0	0	0	0	0
0	0	0	0	0	0	0	0	0	0
0	0	0	0	0	0	0	0	0	0
0	0	0	0	0	0	0	0	0	0
0	0	0	0	0	0	0	0	0	0
0	0	0	0	0	0	0	0	0	0
0	0	0	0	0	0	0	0	0	0
0	0	0	0	0	0	0	0	0	0
0	0	0	0	0	0	0	0	0	0
0	0	0	0	0	0	0	0	0	0
0	0	0	0	0	0	0	0	0	0
0	0	0	0	0	0	0	0	0	0
0	0	0	0	0	0	0	0	0	0
0	0	0	0	0	0	0	0	0	0
0	0	0	0	0	0	0	0	0	0
0	0	0	0	0	0	0	0	0	0
0	0	0	0	0	0	0	0	0	0
0	0	0	0	0	0	0	0	0	0
0	0	0	0	0	0	0	0	0	0
0	0	0	0	0	0	0	0	0	0
0	0	0	0	0	0	0	0	0	0
0	0	0	0	0	0	0	0	0	0
0	0	0	0	0	0	0	0	0	0
0	0	0	0	0	0	0	0	0	0
0	1	0	0	0	0	0	1	0	0
0	0	0	0	0	0	0	0	0	0
0	1	0	0	0	0	0	0	0	0
0	0	0	0	0	0	0	0	0	0
0	0	0	0	0	0	0	0	0	0
0	0	0	0	0	0	0	0	0	0
0	0	0	0	0	0	0	0	0	0
0	0	0	0	0	0	0	0	0	0
0	0	0	0	0	0	0	0	0	0
0	0	0	0	0	0	0	0	0	0
0	0	0	0	0	0	0	0	0	0
0	0	0	0	0	0	0	0	0	0
0	0	0	1	0	0	0	0	0	1
0	0	0	0	0	0	0	0	0	0
0	0	0	0	0	0	0	0	0	0
0	0	0	0	1	0	0	0	0	0
0	0	0	0	0	0	0	0	0	0
0	0	0	0	0	0	0	0	0	0
0	0	0	0	0	0	0	0	0	0
0	0	0	0	0	0	0	0	0	0
0	0	0	0	0	0	0	0	0	0
0	0	0	0	0	0	0	0	0	0
0	0	0	0	0	0	0	0	0	0
0	0	0	0	0	0	0	0	0	0
0	0	0	0	0	0	0	0	0	0
0	0	0	0	0	0	0	0	0	0
0	0	0	0	0	0	0	0	0	0
0	0	0	0	0	0	0	0	0	0
0	0	0	0	0	0	0	0	0	0
0	0	0	0	0	0	0	0	0	0
0	0	0	0	0	0	0	0	0	0
0	0	0	0	0	0	0	0	0	0
0	0	0	0	0	0	0	0	0	0
0	0	0	0	0	0	0	0	0	0
0	0	0	1	0	0	0	0	0	0
0	0	0	0	0	0	0	0	0	0
0	0	0	0	0	0	0	0	0	0
0	0	0	0	0	0	0	0	0	0
0	0	1	0	0	0	0	0	0	0
0	0	0	0	0	0	0	0	0	0
0	0	0	0	0	0	0	0	0	0
0	0	0	0	0	0	0	0	0	0
0	0	0	0	0	0	0	0	0	0
0	0	0	0	0	0	0	0	0	0
0	0	0	0	0	0	0	0	0	0
0	0	0	0	0	0	0	0	0	0
0	0	0	0	0	0	0	0	0	0
0	0	0	1	0	0	0	0	0	0
0	0	0	0	0	0	0	0	0	0
0	0	0	0	0	0	0	0	0	0
0	0	0	0	0	0	0	0	0	0
0	0	0	0	0	0	0	0	0	0
0	0	0	1	0	0	0	0	0	0
0	0	0	0	0	0	0	0	0	0
0	0	0	0	0	0	0	0	0	0
0	0	0	0	0	0	0	0	0	0
0	0	0	0	0	0	0	1	0	0
0	0	0	0	0	0	0	0	0	0
1	0	0	0	0	0	0	0	0	0
0	0	0	0	0	0	0	0	0	0
0	0	0	0	0	0	0	0	0	0
0	0	0	0	0	0	0	0	0	0
0	0	0	0	0	0	0	0	0	0
0	0	0	0	0	0	0	0	0	0
0	0	0	0	0	0	0	0	0	0
0	0	0	0	0	0	0	0	0	0
0	0	0	0	0	0	0	0	0	0
0	0	0	0	0	0	0	0	0	0
0	0	0	0	0	0	0	0	0	0
0	1	0	0	0	0	0	0	0	0
0	0	0	0	0	0	0	0	0	0
0	0	0	0	0	0	0	0	0	0
1	0	0	0	0	0	0	0	0	0
0	0	0	1	0	0	0	0	0	0
0	0	0	0	0	0	0	0	0	0
0	0	0	0	0	0	0	0	0	0
0	0	0	0	0	0	0	0	0	0
0	0	0	0	0	0	0	0	0	0
0	0	0	0	0	1	0	0	0	0
0	0	0	0	0	0	0	0	0	0
0	0	0	0	0	0	0	0	0	0
0	0	0	0	0	0	0	0	0	0
0	0	0	0	0	0	0	0	0	0
0	0	0	0	0	0	0	0	0	0
0	0	0	0	0	0	0	0	0	0
0	0	0	0	0	0	0	0	0	0
0	0	0	0	0	0	0	0	0	0
0	0	0	0	0	0	0	0	0	0
0	0	0	0	0	0	0	0	0	0
0	0	0	0	0	0	0	0	1	0
0	0	0	0	0	0	0	0	0	0
0	1	0	0	0	0	0	0	0	0
0	0	0	0	0	0	0	0	0	0
0	0	0	0	0	0	0	0	0	0
0	0	0	0	0	0	0	0	0	0
0	0	0	0	0	0	0	0	1	0
0	0	0	0	0	0	0	0	0	0
0	0	0	0	0	0	0	0	0	0
0	0	0	0	0	0	0	0	0	0
0	0	0	0	0	0	0	0	0	1
0	0	0	0	0	0	0	0	1	0
0	0	0	0	0	0	0	0	0	0
0	0	0	0	0	0	0	0	0	0
0	0	0	0	0	0	0	0	0	0
0	0	0	0	0	0	0	0	0	0
0	0	0	0	0	0	0	0	0	0
0	0	0	0	0	0	0	0	0	0
0	0	0	0	0	0	0	0	0	0
0	0	0	0	0	0	0	0	0	0
0	0	0	0	0	0	0	0	0	0
0	0	0	0	0	0	0	0	0	0
0	0	0	0	0	0	0	0	0	0
0	0	0	0	0	0	0	0	0	0
0	0	0	0	0	1	0	0	0	0
0	0	0	0	0	0	0	0	0	0
0	0	0	0	0	0	0	0	0	0
0	0	0	0	0	0	0	0	0	0
0	0	0	0	0	0	0	0	0	0
0	0	0	0	0	0	0	0	0	0
0	0	0	0	0	0	0	0	0	0
0	0	0	0	0	0	0	0	0	0
0	0	0	0	0	0	0	0	0	0
0	0	0	0	0	0	0	0	0	0
0	0	0	0	0	0	0	0	0	0
0	0	0	0	0	0	0	0	0	0
0	0	0	0	0	0	0	0	0	0
0	0	0	0	0	0	0	0	0	0
0	0	0	1	0	0	0	0	0	0
0	0	0	0	0	0	0	0	0	0
0	0	0	0	0	0	0	0	0	0
0	0	0	0	0	0	0	0	0	0
0	0	0	0	0	0	0	0	0	0
0	0	0	0	0	0	0	0	0	0
0	0	0	0	0	0	0	0	0	0
0	0	0	0	0	0	0	0	0	0
0	0	0	1	0	0	0	0	0	0
0	0	0	0	0	0	0	0	0	0
0	0	0	0	0	0	0	0	0	0
0	0	0	0	0	0	0	0	0	0
0	0	0	0	0	0	0	0	1	0
0	0	0	0	0	0	0	0	0	0
0	0	0	0	0	0	0	0	0	0
0	0	0	0	0	0	0	0	0	0
0	0	0	0	0	0	0	0	0	0
0	0	0	0	0	0	0	0	0	0
0	0	0	0	0	0	0	0	0	0
0	0	0	1	0	0	0	0	0	0
0	0	0	0	0	0	0	0	0	0
0	0	0	0	0	0	0	0	0	0
0	0	0	0	0	0	0	0	0	0
0	0	0	0	0	0	0	0	1	0
0	0	0	0	0	0	0	0	0	1
0	1	0	0	0	0	0	0	0	0
0	0	0	0	0	1	0	0	0	0
0	0	0	0	0	0	0	0	0	0
0	0	0	0	0	0	0	0	0	0
0	0	0	0	0	1	0	0	0	0
0	0	0	0	0	0	0	0	0	0
0	0	0	0	0	0	0	0	0	0
0	0	0	0	0	0	0	0	0	0
0	0	0	0	0	0	0	0	0	0
0	0	0	0	0	0	0	0	0	0
0	0	0	0	0	0	0	0	0	0
0	0	0	0	0	0	0	0	0	0
0	0	0	0	0	0	0	0	0	0
0	0	0	0	0	0	0	0	0	0
0	0	0	0	0	0	0	0	0	0
0	0	0	0	0	0	0	0	0	0
0	0	0	0	0	0	0	0	0	0
1	0	0	0	0	0	0	0	0	0
0	0	0	0	0	0	0	0	0	0
0	0	0	0	0	0	0	0	0	0
0	0	0	0	0	0	0	0	0	0
0	0	0	0	0	0	0	0	0	0
0	0	1	0	0	0	0	0	0	0
0	0	0	0	0	0	0	0	0	0
0	0	0	0	0	0	0	0	0	0
0	0	0	0	0	0	0	0	0	0
0	0	0	0	0	0	0	0	0	0
0	0	0	0	0	0	0	0	0	0
0	0	0	0	1	0	0	0	0	0
0	0	0	0	0	0	0	0	0	0
0	0	0	0	0	0	0	0	0	0
0	0	0	0	0	0	0	0	0	0
0	0	0	0	0	0	0	0	0	0
0	0	0	0	0	0	0	0	0	0
0	0	0	0	0	1	0	0	0	0
0	0	0	1	0	0	0	0	0	0
0	0	0	0	0	0	0	0	0	0
0	0	0	0	0	0	0	0	0	0
0	0	0	0	0	0	0	0	0	0
0	0	0	0	0	0	0	0	0	0
0	0	0	0	0	0	0	0	0	0
0	0	0	0	0	0	0	0	0	0
0	0	0	0	0	0	0	0	0	0
0	0	0	0	0	0	0	1	0	0
0	0	0	0	0	0	0	0	0	0
0	0	0	0	0	0	0	0	0	0
1	0	0	0	0	0	0	0	0	0
0	0	0	0	0	0	0	0	0	0
0	0	0	0	0	0	0	0	0	0
0	0	0	0	0	0	0	0	0	0
0	0	0	0	0	0	0	0	0	0
0	0	0	0	0	0	0	0	0	0
0	0	0	0	0	0	0	0	0	0
0	0	0	0	0	0	0	0	0	0
0	0	0	0	0	0	0	0	0	0
0	0	0	0	0	0	0	0	0	0
0	0	0	0	0	0	0	0	0	0
0	0	0	0	0	0	0	0	0	0
0	0	0	0	0	0	0	0	0	0
0	0	0	0	0	0	0	0	0	0
0	0	0	0	0	0	0	0	0	0
0	0	0	0	0	0	0	0	0	0
0	1	1	0	0	1	0	0	0	0
0	0	0	0	0	0	0	0	0	0
0	0	1	0	0	0	0	0	0	0
0	0	0	0	0	0	0	0	0	0
0	0	0	0	0	0	0	0	0	0
0	0	0	0	0	0	0	0	0	0
0	0	0	0	0	0	0	0	0	0
0	0	0	0	0	0	0	0	0	0
0	0	0	0	0	0	0	0	0	0
0	0	0	0	0	0	0	0	0	0
0	0	0	0	0	0	0	0	0	0
0	0	0	0	0	0	0	0	0	0
0	0	0	0	0	0	0	0	0	0
0	0	0	0	0	0	0	0	0	0
0	0	0	0	0	0	0	0	0	0
0	1	0	0	0	0	0	0	0	0
0	0	0	0	0	0	0	0	0	0
0	0	0	1	0	0	0	0	0	0
0	1	0	0	0	0	0	0	0	0
0	0	0	0	0	0	0	0	0	0
0	0	0	0	0	0	0	0	0	0
0	0	0	0	0	0	0	0	0	0
0	0	0	0	1	0	0	0	0	0
0	0	0	0	0	0	0	0	0	0
0	0	0	0	0	0	0	0	0	0
0	0	0	0	0	0	0	0	0	0
0	0	0	0	0	0	0	0	0	0
0	0	0	0	0	0	0	0	0	0
0	0	1	0	0	0	0	0	0	0
0	0	0	0	0	0	0	0	0	0
0	0	0	0	0	0	0	0	0	0
0	0	0	0	0	0	0	0	0	0
0	0	0	0	0	0	0	0	0	0
0	0	0	0	0	0	0	0	0	0
0	1	0	0	0	0	0	0	0	0
0	0	0	0	0	0	0	0	0	0
0	0	0	0	0	0	1	0	0	0
0	0	0	0	0	0	0	1	0	1
0	0	0	0	0	0	0	0	0	0
0	0	1	0	0	0	0	0	0	0
0	0	0	0	0	0	0	0	0	0
0	0	0	0	0	0	0	0	0	0
0	0	0	0	0	0	0	0	0	0
0	0	0	0	1	0	0	0	0	0
0	0	0	0	0	0	0	0	0	0
0	0	0	0	0	0	0	0	0	0
0	0	0	0	0	0	0	0	0	0
0	0	0	0	0	0	0	0	0	0
0	0	0	0	0	0	0	0	0	0
0	0	0	0	0	0	0	0	0	0
0	0	0	0	0	0	0	0	0	0
0	0	0	1	0	0	0	0	0	1
0	0	0	0	0	0	0	0	0	0
0	1	0	0	0	0	0	0	0	0
0	0	0	0	0	0	0	0	0	0
0	0	0	0	0	0	0	0	0	0
0	0	0	0	1	0	0	0	0	0
0	0	0	0	0	0	0	0	0	0
0	0	0	0	0	0	0	0	0	0
0	0	0	0	0	0	0	0	0	0
0	0	0	0	0	0	0	0	0	0
0	0	0	0	0	0	0	0	0	1
0	0	0	0	0	0	0	0	0	0
0	0	0	0	0	0	0	0	0	0
0	0	0	0	0	0	0	0	0	1
0	0	0	0	0	0	0	0	0	0
0	0	0	0	0	0	0	0	0	0
0	0	0	0	0	0	0	0	0	0
0	0	0	0	0	0	0	0	0	0
0	0	0	0	0	0	0	0	0	0
0	0	0	0	0	0	0	0	0	0
0	0	0	0	0	0	0	0	0	0
0	0	0	0	0	0	0	0	0	0
0	0	0	0	0	0	0	0	0	0
0	0	0	0	0	0	0	0	0	0
0	0	0	0	0	0	0	0	0	0
0	0	0	0	0	0	0	0	0	0
0	0	0	0	0	0	0	0	0	0
0	0	0	0	0	0	0	0	0	0
0	0	0	0	0	0	0	0	0	0
0	0	0	0	0	0	0	0	0	0
0	0	0	0	0	0	0	0	0	0
0	0	0	0	0	0	0	0	0	0
0	0	0	0	0	0	0	0	0	0
0	0	0	0	0	0	0	0	0	0
0	0	0	0	0	0	0	0	0	0
0	0	0	0	0	0	0	0	0	0
0	0	0	0	0	0	0	0	0	0
0	0	0	0	0	0	0	0	0	0
0	0	0	0	0	0	0	0	0	0
0	0	0	0	0	0	0	0	0	0
0	0	0	0	0	0	0	0	0	0
0	0	0	0	0	0	0	0	0	0
0	0	0	0	0	0	0	0	0	0
0	0	0	0	0	0	0	0	0	0
0	0	0	0	0	0	0	0	0	0
0	0	0	0	0	0	0	0	0	0
0	0	0	0	0	0	0	0	0	0
0	0	0	0	1	0	0	1	0	0
0	0	0	0	0	0	0	0	0	0
0	0	0	0	0	0	0	0	1	0
0	0	0	0	0	0	0	0	0	0
0	0	0	0	0	0	0	0	0	0
0	0	0	0	0	0	0	0	0	0
0	0	0	0	0	0	0	0	0	0
0	0	0	0	0	0	0	0	0	0
0	0	0	0	0	0	0	0	0	0
0	0	0	0	0	0	0	0	0	1
0	0	0	0	0	0	0	0	0	0
0	0	0	0	0	0	0	0	0	0
0	0	0	0	0	0	0	0	0	1
0	0	0	0	0	0	0	0	0	0
0	0	0	0	0	0	0	0	0	0
0	0	0	0	1	0	1	0	0	0
0	0	0	0	0	0	0	1	0	0
0	0	0	0	0	0	0	0	0	0
0	0	0	0	0	0	0	0	0	0
0	0	0	0	0	0	0	0	0	0
0	0	0	0	0	0	0	0	0	0
0	0	0	0	0	0	0	0	0	0
0	0	0	0	0	0	0	0	0	0
0	0	0	0	0	0	0	0	0	0
0	0	0	0	0	0	0	0	0	0
0	0	0	0	0	0	0	0	0	0
0	0	0	0	0	0	1	1	0	0
0	0	0	0	0	0	0	0	0	0
0	0	0	0	0	0	0	0	0	0
0	0	0	0	0	0	0	0	0	0
0	0	0	0	0	0	0	0	0	0
0	0	0	0	0	0	0	0	0	0
0	0	0	0	0	0	0	0	0	0
0	0	0	0	0	0	0	0	0	0
0	0	0	0	0	0	0	0	0	0
0	0	0	0	0	0	0	0	0	0
0	0	0	0	1	0	0	0	0	0
0	0	0	0	0	0	1	0	0	0
0	0	0	0	0	0	0	0	1	0
0	0	0	0	0	0	0	0	0	0
0	0	0	0	0	0	0	0	0	0
0	0	0	0	0	0	0	0	0	0
0	0	0	0	0	0	0	0	0	0
0	0	0	0	1	0	0	0	0	0
0	0	0	0	0	0	0	0	0	0
0	0	0	0	0	0	0	0	0	0
0	0	0	0	0	0	0	0	0	0
0	0	0	0	0	0	0	0	0	0
0	0	0	0	0	0	0	0	0	0
0	0	0	0	0	0	0	1	0	0
0	0	0	0	0	0	0	0	0	0
0	0	0	0	0	0	0	0	0	0
0	0	0	0	0	0	0	0	0	0
0	0	0	0	0	0	0	0	0	0
0	0	0	0	0	0	0	0	0	0
0	0	0	0	0	0	0	0	0	0
0	0	0	0	0	0	0	0	0	0
0	0	0	0	0	0	0	0	0	0
0	0	0	0	0	0	0	0	0	0
0	0	0	0	0	0	0	0	0	0
0	0	0	0	0	0	0	0	0	0
0	0	0	0	0	0	0	0	0	0
0	0	0	0	1	0	0	0	0	0
0	0	0	0	0	0	0	0	0	0
0	0	0	0	0	0	0	0	0	0
0	0	0	0	0	0	0	0	0	0
0	0	0	0	0	0	0	0	0	0
0	0	0	0	0	0	0	0	0	0
0	0	0	0	0	0	0	0	0	0
0	0	0	0	0	0	0	0	0	0
0	0	0	0	0	0	0	0	0	0
0	0	0	0	0	0	0	0	0	0
0	0	0	0	0	0	1	0	0	0
0	0	0	0	0	0	0	0	0	0
1	0	0	0	0	0	0	0	0	0
0	0	0	0	0	0	0	0	0	0
0	0	0	0	0	0	0	0	0	0
0	0	0	0	0	0	0	0	0	0
0	0	0	0	0	0	0	0	0	0
0	0	0	0	0	0	0	0	0	0
0	0	0	0	0	0	0	0	0	0
0	0	0	0	0	0	0	0	0	0
0	0	0	0	0	0	0	0	0	0
0	0	0	0	0	0	0	0	0	0
0	0	0	0	0	0	0	0	0	0
0	0	0	0	0	0	0	0	0	0
0	0	0	0	0	0	0	0	0	0
0	0	0	0	0	0	0	0	0	0
0	0	0	0	0	0	0	0	0	0
0	0	0	0	0	0	0	0	1	0
0	0	0	1	0	0	0	0	0	0
0	0	0	0	0	0	0	0	0	0
0	0	0	0	0	0	0	0	0	0
0	0	0	0	0	0	0	0	0	0
0	0	0	0	0	0	0	0	0	0
0	1	0	0	0	0	0	0	0	0
0	0	0	0	0	0	0	0	0	0
0	0	0	0	0	0	0	0	0	0
0	0	0	1	0	0	0	0	0	0
0	0	0	0	0	0	0	0	0	0
0	0	1	0	0	0	0	0	0	0
0	0	0	0	0	0	0	0	0	0
1	0	0	0	0	0	0	0	0	0
0	0	0	0	0	0	0	0	0	0
0	0	0	0	0	0	0	0	0	0
0	1	0	0	0	0	0	0	0	1
0	0	0	0	0	0	0	0	0	0
0	0	0	0	0	0	0	0	0	0
0	0	0	0	0	0	0	0	0	0
0	0	0	0	0	0	0	0	0	0
0	0	0	0	0	0	0	0	0	0
0	0	0	0	0	0	0	0	0	0
0	0	0	0	0	0	0	0	0	0
0	0	0	0	0	0	0	0	0	0
0	0	0	0	0	0	0	0	0	0
0	0	0	0	0	0	0	0	0	0
0	0	0	0	1	0	0	0	0	0
0	0	0	0	0	0	0	0	0	0
0	0	0	0	0	0	0	0	0	0
0	0	0	0	0	0	0	0	0	0
0	0	0	0	0	0	0	0	0	0
0	0	0	0	0	0	0	0	0	0
0	0	0	0	0	0	0	0	0	0
0	0	0	0	0	0	0	0	0	0
0	0	0	0	0	0	0	0	0	0
0	0	0	0	0	0	0	0	0	0
0	1	0	0	0	0	0	0	0	0
0	0	0	0	0	0	0	0	0	0
0	0	0	0	0	0	0	0	0	0
0	0	0	0	0	0	0	0	0	0
0	0	0	0	0	1	0	0	0	0
0	0	0	0	0	0	0	0	0	0
0	0	0	0	0	0	0	0	0	0
0	0	0	0	0	0	0	0	0	0
0	0	0	0	0	0	0	0	0	0
0	0	0	0	0	0	0	0	0	0
0	0	0	0	0	0	0	0	0	0
0	0	0	0	0	0	0	0	0	0
0	0	0	0	0	0	0	0	0	0
0	0	0	0	0	0	0	0	0	0
0	0	1	0	0	0	0	0	0	0
0	0	0	0	0	0	0	0	0	0
0	0	0	0	0	0	0	0	0	0
0	0	0	0	0	0	0	0	1	0
0	0	0	0	0	0	0	0	0	0
0	0	0	0	0	0	0	0	0	0
0	0	0	0	0	0	0	0	0	0
0	0	0	0	0	0	0	0	0	0
0	0	0	0	0	0	0	0	0	0
0	0	0	0	0	0	0	0	0	0
0	0	0	0	0	0	0	0	0	0
1	0	0	0	0	0	0	0	0	0
0	0	0	0	0	1	0	0	0	0
0	0	0	1	0	0	0	0	0	0
1	0	0	0	0	0	0	0	0	0
0	0	0	0	0	0	0	0	0	0
0	0	0	0	0	0	0	0	0	0
0	0	0	0	0	0	0	1	0	0
0	0	0	0	0	0	0	0	0	0
0	0	0	0	0	1	0	0	0	0
0	0	0	0	0	0	0	0	0	1
0	0	0	0	0	0	0	0	0	0
0	0	0	0	0	0	0	0	0	0
0	0	0	0	0	0	0	0	0	0
0	0	0	0	0	0	0	0	0	0
0	0	0	0	0	0	0	0	0	0
0	0	0	0	0	0	0	0	0	0
0	0	0	0	0	0	0	0	0	0
0	0	0	0	0	0	0	0	0	0
0	0	0	0	0	0	0	0	0	0
0	0	0	0	0	0	0	0	0	0
0	0	0	0	0	0	0	0	0	0
0	0	0	0	0	0	0	0	0	0
0	0	0	0	0	0	0	0	1	0
0	0	0	0	0	0	0	0	0	0
0	0	0	0	0	0	0	0	0	0
0	1	0	0	0	0	0	0	0	0
0	0	0	0	0	0	0	0	0	0
0	0	0	0	0	0	0	0	0	0
0	0	0	0	0	0	0	0	0	0
0	0	0	0	0	0	0	0	0	0
0	0	0	0	0	0	0	0	0	0
0	0	0	0	0	0	0	0	0	0
0	0	0	0	0	0	0	0	0	0
0	0	0	0	0	0	0	0	0	0
0	0	0	0	0	0	0	0	0	0
0	1	0	0	0	0	0	0	0	0
0	0	0	0	0	1	0	0	0	0
0	0	0	0	0	0	0	0	0	0
0	0	0	0	0	0	0	0	0	0
0	0	0	0	0	0	0	0	0	0
0	0	0	0	0	0	0	0	0	0
0	0	0	0	0	0	0	0	0	0
0	0	0	0	0	0	0	0	0	0
0	0	0	0	0	0	0	0	0	0
0	0	0	0	0	0	0	0	0	0
0	0	0	1	0	0	0	0	0	0
0	0	0	0	0	0	0	0	0	0
0	0	0	0	0	0	0	0	0	0
0	0	0	0	0	0	0	0	0	0
0	1	0	0	0	0	0	0	0	0
0	0	0	0	0	0	0	0	0	0
0	0	0	0	0	0	0	0	0	0
0	0	0	0	0	0	0	0	0	0
0	0	0	0	0	0	0	0	0	0
0	0	0	0	0	0	0	0	0	0
0	0	0	0	0	0	0	0	0	0
0	0	0	0	0	0	0	0	0	0
0	0	0	0	0	0	0	0	0	0
0	0	0	0	0	0	0	0	0	0
0	0	0	0	0	0	0	0	0	0
0	0	0	0	0	0	0	0	0	0
0	0	0	0	0	0	0	0	0	0
0	0	0	0	0	0	0	0	0	0
0	0	0	0	0	0	0	0	0	0
0	0	0	0	0	1	0	0	0	0
0	0	0	0	0	0	0	0	0	0
0	0	0	0	0	0	0	0	0	0
0	0	0	0	0	0	0	0	0	0
0	0	0	0	0	0	0	0	0	0
0	0	0	0	0	1	0	0	0	0
0	0	0	0	0	0	0	0	0	0
0	0	0	0	0	0	0	0	0	0
0	0	0	0	0	1	0	0	0	0
0	0	0	0	0	0	1	0	0	0
0	0	0	0	0	1	0	0	0	0
0	0	0	0	0	0	0	0	0	0
0	0	0	0	0	0	0	0	0	0
0	0	0	0	0	0	0	0	0	0
0	0	0	0	0	0	0	0	0	0
0	0	0	0	0	0	0	0	0	0
0	0	0	0	0	0	0	0	0	0
0	0	0	0	0	0	0	0	0	0
0	0	0	0	0	0	0	0	0	0
0	0	0	0	0	0	0	0	0	0
0	0	0	0	0	0	0	0	0	0
0	0	0	0	0	0	0	0	0	0
0	0	0	0	0	0	0	0	0	0
0	0	0	0	0	0	0	0	0	0
0	0	0	0	0	0	0	0	0	0
0	0	0	0	0	0	0	0	0	0
0	0	0	0	0	0	0	0	0	0
0	0	0	0	0	0	0	0	0	0
0	0	0	0	0	0	0	0	0	0
0	0	0	0	0	0	0	0	0	0
0	0	0	0	0	0	0	1	0	0
0	0	0	0	0	0	0	0	0	0
0	0	0	0	0	1	0	0	0	0
0	0	0	0	0	0	0	0	0	0
0	0	0	0	0	0	0	0	0	0
0	0	0	0	0	0	0	0	0	0
0	0	0	0	0	0	0	0	0	0
0	0	0	0	0	1	0	0	0	0
0	0	0	0	0	0	0	0	0	0
0	0	0	0	0	0	0	0	0	0
0	0	0	0	0	0	0	0	0	0
0	0	0	0	0	0	0	0	0	0
0	0	0	0	0	0	0	0	0	0
0	0	0	0	0	0	0	0	0	0
0	0	0	0	0	0	0	0	0	0
0	0	0	0	0	0	0	0	0	0
0	0	0	0	0	0	0	0	0	0
0	0	0	0	0	0	0	0	0	0
0	0	0	0	0	0	0	0	0	0
0	0	0	0	0	0	0	0	0	0
0	0	0	0	0	0	0	0	0	0
0	0	0	0	0	0	0	0	0	0
0	0	0	0	0	0	0	0	0	0
0	0	0	0	0	0	0	0	0	0
0	0	0	0	0	0	0	0	0	0
0	0	0	0	0	0	0	0	0	0
0	0	0	0	0	0	0	0	0	0
0	0	0	0	0	0	0	0	0	0
0	0	0	0	0	0	0	0	0	0
0	0	0	0	0	0	0	0	0	0
0	0	0	0	0	0	0	0	0	0
0	0	0	1	0	0	0	0	0	0
0	0	0	0	0	0	0	0	0	0
0	0	0	0	0	0	0	0	0	0
0	0	0	0	0	0	0	0	0	0
0	0	0	0	0	0	0	0	0	0
0	0	0	0	0	0	0	0	0	0
0	0	0	0	0	0	0	0	0	0
0	0	0	0	0	0	0	0	0	0
0	0	0	0	0	0	0	0	0	0
0	0	0	0	0	0	0	0	0	0
0	0	0	0	0	0	0	0	0	0
0	0	0	0	0	0	0	0	0	0
0	0	0	0	0	0	0	0	0	0
0	0	0	0	0	0	0	0	0	0
0	0	0	0	0	0	0	0	0	0
0	0	0	0	0	0	0	0	0	0
0	0	0	0	1	0	0	0	0	0
0	0	0	0	0	0	0	0	0	0
0	0	0	0	0	0	0	0	0	0
0	0	0	0	0	0	0	0	0	0
0	0	0	0	0	0	0	0	0	0
0	0	0	0	0	0	0	0	0	0
0	0	0	0	0	0	0	0	0	0
0	0	0	0	0	0	0	0	0	0
0	0	0	0	0	0	0	0	0	0
0	0	0	0	0	0	0	0	0	0
0	0	0	0	0	0	0	0	0	0
0	0	0	0	0	0	0	0	0	0
0	0	0	0	0	0	0	0	0	0
0	0	0	0	0	0	0	0	0	0
0	0	0	0	0	0	0	0	0	0
0	0	0	0	0	0	0	0	0	0
0	0	0	0	0	0	0	0	0	0
0	0	0	0	0	0	0	0	0	0
0	0	0	0	1	0	0	0	0	0
0	0	0	0	0	0	0	0	0	0
0	0	0	0	0	0	0	0	0	0
0	0	0	0	0	0	0	0	0	0
0	0	0	0	0	0	0	0	0	0
0	0	0	0	0	0	0	0	0	0
0	0	0	0	0	0	0	0	0	0
0	0	0	0	0	0	0	0	0	0
0	0	0	0	0	1	0	0	0	0
0	0	0	0	0	1	0	0	0	0
0	0	0	0	0	0	0	0	0	0
0	0	0	0	0	0	0	0	0	0
0	0	0	0	0	0	0	0	0	0
0	0	0	0	0	0	0	0	0	0
0	0	0	0	0	0	0	0	0	0
0	0	0	0	0	0	0	0	0	0
0	0	0	0	0	0	0	0	0	0
0	0	0	0	0	0	0	0	0	0
0	0	0	0	0	0	0	0	0	0
0	0	0	0	0	0	0	0	0	0
0	0	0	0	0	0	0	1	0	0
0	0	0	0	0	0	0	0	0	0
0	0	0	0	0	0	0	0	0	0
0	0	0	0	0	0	0	0	0	0
0	0	0	0	0	0	0	0	0	0
0	0	0	0	0	0	0	0	0	0
0	0	0	0	0	0	0	0	0	0
0	0	0	0	0	0	0	0	0	0
0	0	0	0	0	0	0	0	0	0
0	0	0	0	0	0	0	0	0	0
0	0	0	0	0	0	0	0	0	0
0	0	0	0	0	0	0	0	0	0
0	0	0	0	0	0	0	0	0	0
0	0	1	0	0	0	0	0	0	0
0	0	0	0	0	0	0	0	0	0
0	0	0	0	0	0	0	0	0	1
0	0	0	0	0	0	0	0	0	0
0	0	0	0	0	0	1	0	0	0
0	0	0	0	0	0	0	0	0	0
0	0	0	0	0	0	0	0	0	0
0	0	0	0	0	0	0	0	0	0
0	0	0	0	0	0	0	0	0	0
0	0	0	0	0	0	0	0	0	0
0	0	0	0	0	0	0	0	0	0
0	0	0	0	0	0	0	0	0	0
0	0	0	0	0	0	0	0	0	0
0	0	0	0	0	0	0	0	0	0
0	0	0	0	0	0	0	0	0	0
0	0	0	0	0	0	1	0	0	0
0	0	0	0	0	0	0	0	0	0
0	0	0	0	0	0	0	0	0	0
0	0	0	0	0	0	0	0	0	0
0	0	0	0	0	0	0	0	0	0
0	0	0	0	0	0	0	0	0	0
0	0	0	0	0	0	0	0	0	0
0	0	0	0	0	0	0	0	0	0
0	0	0	0	0	0	0	0	0	0
0	0	0	0	0	0	0	0	0	0
0	0	0	0	0	0	0	0	0	0
0	0	0	0	0	0	0	0	0	0
0	0	0	0	0	0	0	0	0	0
0	0	0	0	0	0	0	0	0	0
0	0	0	0	0	0	0	0	0	0
0	0	0	0	0	0	0	0	0	0
0	0	0	0	0	0	0	0	0	0
0	0	0	0	0	0	0	0	0	0
0	0	0	0	0	0	0	0	0	0
0	0	0	0	0	0	0	0	0	0
0	0	0	0	0	0	0	0	0	0
0	0	0	0	0	0	0	0	0	0
0	0	0	0	0	0	0	0	0	0
0	0	0	0	0	0	0	0	0	0
0	0	0	0	0	0	0	0	0	0
0	0	0	0	0	0	0	0	0	0
0	0	0	0	0	0	0	0	0	0
0	0	0	0	0	0	0	0	0	0
0	0	0	0	0	1	0	0	0	0
0	0	0	0	0	0	0	0	0	0
0	0	0	0	0	0	0	0	0	0
0	0	0	0	0	0	0	0	0	0
0	0	0	0	0	0	0	0	0	0
0	0	0	0	0	0	0	0	1	0
0	0	0	0	0	0	0	0	0	0
0	0	0	0	0	0	0	0	0	0
0	1	0	0	0	0	0	0	0	0
0	0	0	0	0	0	0	0	0	0
0	0	0	0	0	0	0	0	0	0
0	0	0	0	0	1	0	0	0	0
0	0	0	0	0	0	0	0	0	0
0	0	0	0	0	0	0	0	0	0
0	0	0	0	0	0	0	0	0	0
0	0	0	0	0	0	0	0	0	0
0	0	0	0	0	0	0	0	0	0
0	0	0	0	0	1	0	0	0	0
0	0	0	0	0	0	0	0	0	0
0	0	0	0	0	0	0	0	0	0
0	0	0	0	0	0	0	0	0	0
0	0	0	0	0	0	0	0	0	0
0	0	0	0	0	0	0	0	0	0
0	0	0	0	0	0	1	0	0	0
0	0	0	0	0	0	0	0	0	0
0	0	0	0	0	0	0	0	0	0
0	0	0	0	0	0	0	0	0	0
0	0	0	0	0	0	0	0	0	1
0	0	0	0	0	0	0	0	0	0
0	0	0	0	0	0	0	0	0	0
0	0	0	0	0	0	0	0	0	0
0	0	1	1	0	0	0	0	0	0
0	0	0	0	0	0	0	0	0	0
0	0	0	0	0	0	0	0	0	0
0	0	0	0	0	0	0	0	0	1
0	0	0	0	0	0	0	0	0	0
0	0	0	0	0	0	0	0	0	0
0	0	0	0	0	0	0	0	0	0
0	0	0	0	0	0	0	0	0	0
0	0	0	0	0	0	0	0	0	0
0	0	0	0	0	0	0	0	1	0
0	0	0	0	0	0	0	0	0	0
0	0	0	0	0	0	0	0	0	0
0	0	0	0	0	0	0	0	0	0
0	0	1	0	0	0	0	0	0	0
0	0	0	0	1	0	0	0	0	0
0	0	0	0	0	0	0	0	0	0
0	0	0	0	0	0	0	0	0	0
0	0	0	0	0	1	0	0	0	0
0	0	0	0	0	0	0	0	0	0
0	0	0	0	0	0	0	0	0	0
0	0	0	0	0	0	0	0	0	0
0	0	0	0	0	0	0	0	0	0
0	0	0	0	0	0	0	0	0	0
0	0	0	0	0	0	0	0	0	0
0	0	0	0	0	0	0	0	0	0
0	0	0	0	0	0	0	0	0	0
0	0	0	0	0	0	0	0	0	0
0	0	0	0	0	0	0	0	0	0
0	0	0	0	0	0	0	0	0	0
0	0	0	0	0	0	0	0	0	0
0	0	0	0	0	0	0	0	0	0
0	0	0	0	0	0	0	0	0	0
0	0	0	0	0	1	0	0	0	0
0	0	0	0	0	0	0	0	0	0
0	0	0	0	0	0	0	0	0	0
0	0	0	0	0	0	0	0	0	0
0	0	0	0	0	0	0	0	0	0
0	0	0	0	0	1	0	0	0	0
0	0	0	0	0	0	0	0	0	0
0	0	0	0	0	0	0	0	0	0
0	0	0	0	0	0	0	0	0	1
0	0	0	0	0	0	0	0	0	0
0	0	0	0	0	0	0	0	0	0
0	0	0	0	0	0	0	0	0	0
0	0	0	0	0	0	0	0	0	0
0	0	0	0	0	0	0	0	0	0
0	0	0	0	0	0	0	0	0	0
0	0	0	0	0	0	0	0	0	0
0	0	0	0	0	0	0	0	0	0
0	0	0	0	0	0	0	0	0	0
0	0	0	0	0	0	0	0	0	0
0	0	0	1	0	0	0	0	0	0
0	0	0	0	0	0	0	0	0	0
0	0	0	0	0	0	0	0	0	0
0	0	0	0	0	0	0	0	0	0
0	0	0	0	0	0	0	0	0	0
0	0	0	0	0	0	0	0	0	0
0	0	0	0	0	0	0	0	0	0
0	0	0	0	0	0	0	0	0	1
0	0	0	0	0	0	0	0	0	0
0	0	0	0	0	0	0	0	0	0
0	0	0	0	0	0	0	0	0	0
0	0	0	0	0	0	0	0	0	0
0	0	0	0	0	0	0	0	0	0
0	0	0	0	0	0	0	0	0	0
0	0	0	0	0	0	0	0	0	0
0	0	0	0	0	0	0	0	0	0
0	0	0	0	0	0	0	0	0	0
0	0	0	0	0	0	0	1	0	0
0	0	0	0	0	0	0	0	0	0
0	0	0	0	0	0	0	0	0	0
0	0	0	0	0	0	0	1	0	0
0	0	0	0	1	0	0	0	0	0
0	0	0	0	0	0	0	0	0	0
0	0	0	0	0	0	0	0	0	0
0	0	0	0	0	0	0	0	0	0
0	0	0	0	0	0	0	0	0	0
0	0	1	1	0	0	0	0	0	0
0	0	0	0	0	0	0	0	0	0
0	0	0	0	0	0	0	0	0	0
0	0	0	0	0	0	0	0	0	0
0	0	0	0	1	0	0	0	0	0
0	0	0	0	0	0	0	0	0	0
0	0	0	0	1	0	0	0	0	0
0	0	0	0	0	0	0	0	0	0
0	0	0	0	0	0	0	0	0	0
0	0	0	0	0	0	0	0	0	0
0	0	0	0	0	0	0	0	0	0
0	0	0	0	1	0	0	0	0	0
1	0	0	0	0	0	0	0	0	0
0	0	0	0	0	0	0	0	0	0
0	0	0	0	0	0	0	0	0	0
0	0	0	1	0	0	0	0	0	0
0	0	0	0	0	0	0	0	0	0
0	0	0	0	0	0	1	0	0	0
0	0	0	0	0	0	0	0	0	0
0	0	0	0	0	0	0	0	0	0
0	0	0	0	0	0	0	0	0	0
0	0	0	0	0	0	0	0	0	0
0	0	0	0	0	0	0	0	0	0
0	0	0	0	0	0	0	0	0	0
0	0	0	0	0	0	0	0	0	0
0	0	0	0	0	0	0	0	0	0
0	0	0	0	0	0	0	0	0	0
0	0	0	0	0	0	0	0	0	0
0	0	0	0	0	0	0	0	0	0
0	0	0	0	0	0	0	0	0	0
0	0	0	0	0	0	0	0	0	0
0	0	0	0	0	0	0	0	0	0
0	0	0	0	0	0	0	0	0	0
0	0	0	0	0	1	0	0	0	0
0	0	0	0	0	0	0	0	0	0
0	0	0	0	0	0	0	0	0	0
0	0	0	0	0	0	0	0	0	0
0	0	0	0	0	0	0	0	0	0
0	0	0	0	0	0	0	0	0	0
0	0	0	0	0	0	0	0	0	0
0	0	0	0	0	0	0	0	0	0
0	0	0	0	0	0	0	0	0	0
0	0	0	0	0	0	0	0	0	0
0	0	0	0	0	0	0	0	0	0
0	0	0	0	0	1	0	0	0	0
0	0	0	1	0	0	0	0	0	0
0	0	0	0	0	0	0	0	0	0
0	0	0	0	0	0	0	0	0	0
0	0	0	0	0	0	0	0	0	0
0	0	0	0	0	0	0	0	0	0
0	0	0	0	0	0	0	0	0	0
0	0	0	0	0	0	0	0	0	0
0	0	0	0	0	0	0	0	0	0
0	0	0	0	0	0	0	0	0	0
0	0	0	0	0	0	0	0	0	0
0	0	0	0	0	0	0	0	0	0
0	0	0	0	1	0	0	0	0	0
0	0	0	0	0	0	0	0	0	0
0	0	0	0	0	0	0	0	0	0
0	0	0	0	0	0	0	0	0	0
0	0	0	0	0	0	0	0	0	0
0	0	0	0	0	0	0	0	0	0
0	0	0	0	0	0	0	0	0	0
0	0	0	0	0	0	0	0	0	0
0	0	0	0	0	0	0	0	0	0
0	0	0	0	0	0	0	0	0	0
0	0	0	0	0	0	0	0	0	0
0	0	0	0	0	0	0	0	0	0
0	0	0	0	0	0	0	0	0	0
0	0	0	0	0	0	0	0	0	0
0	0	0	0	0	0	0	0	0	0
0	0	0	0	0	0	0	0	0	0
0	0	0	0	0	0	0	0	0	0
0	0	0	0	0	0	0	0	0	0
0	0	0	0	1	0	0	0	0	0
0	0	0	0	0	0	0	0	0	0
0	0	0	0	0	0	0	0	0	0
0	0	0	0	0	0	0	0	0	0
0	0	0	0	0	0	0	0	0	0
0	0	0	0	0	0	0	0	0	0
0	0	0	0	0	0	0	0	0	0
0	0	0	0	0	0	0	0	0	0
0	0	0	0	0	0	0	0	0	0
0	0	0	0	0	0	0	0	0	0
0	0	0	0	0	0	0	0	0	0
0	0	0	0	0	0	0	0	0	0
0	0	0	0	0	0	0	0	0	0
0	0	0	0	0	0	0	0	0	0
0	0	0	0	0	0	0	0	0	0
0	0	0	0	0	0	0	0	0	0
0	0	0	0	0	0	0	0	0	0
0	0	0	0	0	0	0	0	0	0
0	0	0	0	0	0	0	0	0	0
0	0	0	0	0	0	0	0	0	0
0	0	0	0	0	0	0	0	0	0
0	0	0	0	0	0	0	0	0	0
0	0	0	0	0	0	0	0	0	0
0	0	0	0	0	0	0	0	0	0
0	0	0	0	1	0	0	0	0	0
0	0	0	0	0	1	0	0	0	0
0	0	0	0	0	0	0	0	0	0
0	0	0	0	0	0	0	0	0	0
0	0	0	0	0	0	0	0	0	0
0	0	0	0	0	0	0	0	0	0
0	0	0	0	0	0	0	0	0	0
0	0	0	0	0	0	0	0	0	0
0	0	0	0	0	0	0	0	0	0
0	0	0	0	0	0	0	0	0	0
0	0	0	0	0	0	0	0	0	0
0	0	0	0	0	0	0	0	0	0
0	0	0	0	0	0	0	0	0	0
0	0	0	0	0	0	0	0	0	0
0	0	0	0	0	0	0	0	0	0
0	0	0	0	0	0	0	0	0	0
0	0	0	0	0	0	0	0	0	0
0	0	0	0	0	0	0	0	0	0
0	0	0	0	0	0	0	0	0	0
0	0	0	0	0	0	0	0	0	0
0	0	0	0	0	0	0	0	0	0
0	0	0	0	0	1	0	0	0	0
0	0	0	0	0	0	1	0	0	0
0	0	0	0	1	0	0	0	0	0
0	0	0	0	0	0	0	0	0	0
0	0	0	0	0	0	0	0	1	0
0	0	0	0	0	0	0	0	0	0
1	0	0	0	0	0	0	0	0	0
0	0	0	0	0	0	0	0	0	0
0	0	0	0	0	0	0	0	0	0
0	0	0	0	0	0	0	0	0	0
0	0	0	0	0	0	0	0	0	0
0	0	0	0	0	0	0	0	0	0
0	0	0	0	0	0	0	0	0	0
0	0	0	0	0	0	0	0	0	0
0	0	0	0	0	1	0	0	0	0
0	0	0	0	0	0	0	0	0	0
0	0	0	0	0	0	0	0	0	0
0	0	0	0	0	0	0	0	0	0
0	0	0	0	0	0	0	0	0	0
0	0	0	0	0	0	0	0	0	0
0	0	0	0	0	0	0	0	0	1
0	0	0	0	0	0	0	0	0	0
0	0	0	0	0	0	0	0	0	0
0	0	0	0	0	0	0	0	0	0
0	0	0	0	0	0	0	0	0	0
0	0	0	0	0	0	0	0	0	0
0	0	0	0	0	0	0	0	0	0
0	0	0	0	0	0	0	0	0	0
0	0	0	0	0	0	0	0	0	0
0	0	0	0	0	0	0	0	0	0
0	0	0	0	0	0	0	0	0	0
0	0	0	0	0	0	0	0	0	0
0	0	0	0	0	0	0	0	0	0
0	0	0	0	0	0	0	0	0	0
0	0	0	0	0	0	0	0	0	0
0	0	0	0	0	0	0	0	0	0
0	0	0	0	0	0	0	0	0	0
0	0	0	0	0	0	0	0	0	0
0	0	0	0	0	0	0	0	0	0
0	0	0	0	0	0	0	0	0	0
0	0	0	0	0	0	0	0	0	0
0	0	0	0	0	0	0	0	1	0
0	0	0	0	0	0	0	0	0	0
0	0	0	0	0	0	0	0	0	0
0	1	0	0	0	0	0	0	0	0
0	0	0	0	0	0	0	0	0	0
0	0	0	1	0	0	0	0	0	0
0	0	0	0	0	0	0	0	0	0
0	0	0	0	0	0	0	0	0	0
0	0	0	0	0	0	0	0	0	0
0	0	0	0	0	0	0	0	0	0
0	0	0	0	0	0	0	0	0	0
0	0	0	0	0	0	0	0	0	0
0	0	0	0	0	0	0	0	0	0
0	0	0	0	0	0	0	0	0	0
0	0	0	0	0	0	0	0	0	0
0	0	0	0	0	0	0	0	0	0
0	0	0	0	0	0	0	0	0	0
0	0	0	0	0	0	0	0	0	0
0	0	1	0	0	0	0	0	0	0
0	0	0	0	0	0	0	0	0	0
0	0	0	0	0	0	0	0	0	0
0	0	0	0	0	0	0	0	0	0
0	0	0	0	0	0	0	0	0	0
0	0	0	0	0	0	0	0	0	0
0	0	0	0	0	0	0	0	0	0
0	0	0	0	0	0	0	0	0	0
0	0	0	0	0	0	0	0	0	0
0	0	0	0	0	0	0	0	0	0
0	0	0	0	0	0	0	0	0	0
0	0	0	0	0	0	0	0	0	0
0	0	0	0	0	0	0	0	0	0
0	0	0	0	0	0	0	0	0	0
0	0	0	0	0	0	0	0	0	0
0	0	0	0	0	0	0	0	0	0
0	0	0	0	0	0	0	0	0	0
0	0	0	0	0	0	0	0	0	0
0	0	0	0	0	0	0	0	0	0
0	0	0	0	0	0	0	0	0	0
0	0	0	0	0	0	0	1	0	0
0	0	0	0	0	0	0	0	0	0
0	0	0	0	0	0	0	0	0	0
0	0	0	0	0	0	0	0	0	0
0	0	0	0	0	0	0	0	0	0
0	0	0	0	0	0	0	0	0	0
0	0	0	0	0	0	0	0	0	0
0	0	0	0	0	0	0	0	0	0
0	0	0	0	0	0	0	1	0	0
0	0	0	0	0	0	0	0	0	0
0	0	0	0	0	0	0	0	0	0
0	0	0	0	0	0	0	0	0	0
0	0	0	0	0	0	0	0	0	0
0	0	0	0	0	0	0	0	0	0
0	0	0	0	0	0	0	0	0	0
0	0	0	0	0	0	0	0	0	0
0	0	0	0	0	0	0	0	0	0
0	0	0	0	0	0	0	0	0	0
0	0	0	0	0	0	0	1	0	0
0	0	0	0	0	0	0	0	0	0
0	0	0	0	0	0	0	0	0	0
0	0	0	0	0	0	0	0	0	0
0	0	0	0	0	0	0	0	0	0
0	0	0	0	0	0	0	0	0	0
0	0	0	0	0	0	0	0	0	0
0	0	0	0	0	0	0	0	0	0
0	0	0	0	0	0	0	0	0	0
0	0	0	0	0	0	0	0	0	0
0	0	0	0	0	0	0	0	0	0
0	0	0	0	0	0	0	0	0	0
0	0	0	0	0	0	0	0	0	0
0	0	0	0	0	0	0	0	0	0
0	0	0	0	0	0	0	0	0	0
0	0	0	0	0	0	0	0	0	0
0	0	0	0	0	0	0	0	0	0
0	0	0	0	0	0	0	0	0	0
0	0	0	0	0	0	0	0	0	0
0	0	0	0	1	0	0	0	0	0
0	0	0	0	0	0	0	0	0	0
0	0	0	0	0	0	0	1	0	0
0	0	0	0	0	0	0	0	0	0
0	0	0	0	0	0	0	0	0	0
0	0	0	0	0	0	0	0	0	0
0	0	0	0	0	0	0	0	0	0
0	0	0	0	0	0	0	0	0	0
0	0	0	0	0	0	0	0	0	1
0	0	0	0	0	0	0	0	0	1
0	0	0	0	0	0	0	0	0	0
0	0	0	0	0	0	0	0	0	0
0	0	0	0	0	0	0	0	0	0
0	0	0	0	0	0	0	0	0	0
0	0	0	0	0	0	0	0	0	0
0	0	0	0	0	0	0	0	0	0
0	0	0	0	0	0	0	0	0	0
0	0	0	0	0	0	0	0	0	0
0	0	0	0	0	0	0	0	0	0
0	0	0	0	0	0	0	0	0	0
1	0	0	0	0	0	0	0	0	0
0	0	0	0	0	0	0	0	0	0
0	0	0	0	0	0	0	0	0	0
0	0	0	1	0	0	0	0	0	0
1	0	0	0	0	0	0	0	0	0
0	0	0	0	0	0	0	0	0	0
0	0	0	0	0	0	1	0	0	0
0	0	0	0	0	0	0	0	0	0
0	0	0	0	0	0	0	1	0	0
0	0	0	0	0	0	0	1	0	0
0	0	0	0	0	0	0	0	0	0
0	0	0	0	0	0	0	0	0	0
0	0	0	0	0	0	0	0	0	0
0	0	0	0	0	0	0	0	0	0
0	0	0	0	0	0	0	0	0	0
0	0	0	0	0	0	0	0	0	0
0	0	0	0	0	0	0	0	0	0
0	0	0	0	0	0	0	0	0	0
0	0	0	0	0	0	0	0	0	0
0	0	0	0	0	0	0	0	0	0
0	0	0	0	0	0	0	0	0	0
0	0	0	0	0	0	0	0	0	0
0	0	0	0	0	0	0	0	1	0
0	0	0	0	0	0	0	0	0	0
0	0	0	0	0	0	0	0	0	0
0	0	0	0	0	0	0	0	0	0
0	0	0	0	0	0	0	0	0	0
0	0	0	0	0	0	0	0	0	0
0	0	0	0	0	0	0	0	0	0
0	0	0	0	0	0	0	0	0	1
0	0	0	0	0	0	0	0	0	0
0	0	0	0	0	0	0	0	0	0
0	0	0	0	0	0	0	0	0	0
0	0	0	0	0	0	0	0	0	0
0	0	0	0	0	0	0	0	0	0
0	0	0	1	0	0	0	0	0	0
0	0	0	0	0	0	0	0	0	0
0	0	0	0	0	0	0	0	0	0
0	0	1	0	0	0	0	0	0	0
0	0	0	0	0	0	0	0	0	0
0	0	0	0	0	0	0	0	0	0
0	0	0	0	0	0	0	0	0	0
0	0	0	0	0	0	0	0	0	0
0	0	0	0	0	0	0	0	0	0
0	0	0	0	0	0	0	0	0	0
0	0	0	0	0	0	0	0	0	0
0	0	0	0	0	0	0	0	0	0
0	0	0	0	0	0	0	0	0	0
0	0	0	0	0	0	0	0	0	0
0	0	0	0	0	0	0	0	0	0
1	0	0	0	0	0	0	0	0	0
0	0	0	0	0	0	0	0	0	0
0	0	0	0	0	0	0	0	0	0
0	0	0	0	0	0	0	0	0	0
0	0	0	0	0	0	0	0	0	0
0	0	0	0	0	0	0	0	0	0
0	0	0	0	0	0	0	0	0	1
0	0	0	0	0	0	0	0	0	0
0	0	0	0	0	0	0	0	0	0
0	0	0	0	0	0	0	0	0	0
0	0	0	0	0	0	0	0	0	0
0	0	0	0	0	0	0	0	0	0
0	0	0	0	0	0	0	0	0	0
0	0	0	0	0	0	0	0	0	0
0	0	0	0	0	0	0	0	0	0
0	0	0	0	0	0	0	0	0	0
0	0	0	0	0	0	0	0	0	0
0	0	0	0	0	0	0	0	0	0
0	0	0	0	0	0	1	0	0	0
0	0	0	0	0	0	0	0	0	0
0	0	0	0	0	0	0	0	0	0
0	0	0	0	0	0	0	0	0	0
0	0	0	0	0	0	0	0	0	0
0	0	0	0	0	0	0	0	0	0
0	0	0	0	0	0	0	0	0	0
0	0	0	0	0	0	0	0	0	0
0	0	0	0	0	0	0	0	0	0
0	0	0	0	0	0	0	0	0	0
0	0	0	0	0	0	0	0	0	0
0	0	0	0	0	0	0	0	0	0
0	0	0	0	0	0	0	0	0	0
0	0	0	0	0	0	0	0	0	0
0	0	0	0	0	0	0	0	0	0
0	0	0	0	0	0	0	0	0	0
0	0	0	0	0	0	0	0	0	0
0	0	0	0	0	0	0	0	0	0
0	0	0	0	0	0	0	0	0	0
0	0	0	0	0	0	0	0	0	0
0	0	0	0	0	0	0	0	1	0
0	0	0	0	0	0	0	0	0	0
0	0	0	0	0	0	0	0	0	1
0	0	0	0	0	0	0	0	0	0
0	0	0	0	0	0	0	0	0	0
0	0	0	0	0	1	0	0	0	0
0	0	0	0	0	0	0	0	0	0
0	0	0	0	0	0	0	1	0	0
0	0	0	0	0	0	0	0	0	0
0	0	0	0	0	0	0	0	0	0
0	0	0	0	0	0	0	0	0	0
1	0	0	0	0	0	0	0	0	0
0	0	0	0	0	0	0	0	0	0
0	0	0	0	0	0	0	0	1	0
0	0	0	0	0	0	0	0	0	0
0	0	0	0	0	0	0	0	0	0
0	0	0	0	0	0	0	0	0	0
0	0	0	0	0	0	0	0	0	0
0	0	0	0	0	0	0	0	0	0
0	0	0	0	0	0	0	0	0	0
0	0	0	0	0	0	0	0	0	0
0	0	0	0	0	0	0	0	0	0
0	0	0	0	0	0	0	0	0	0
0	0	0	0	0	0	0	0	0	0
0	0	0	0	0	0	0	0	0	0
0	0	0	0	0	0	0	0	0	0
0	0	0	0	0	0	0	0	0	0
0	0	0	0	0	0	0	0	0	0
0	0	0	0	0	0	0	0	0	0
0	0	0	0	0	0	0	0	0	0
0	0	0	0	0	0	0	0	0	0
0	0	0	0	0	0	0	0	0	0
0	0	0	0	0	0	0	0	0	0
0	0	0	0	0	0	0	0	0	0
1	0	0	0	0	0	0	0	0	0
0	0	0	0	0	0	0	0	0	0
0	0	0	0	0	0	0	0	0	0
0	0	0	0	0	0	0	0	0	0
0	0	0	0	0	0	0	0	0	0
0	0	0	0	0	0	0	0	0	0
0	0	0	0	0	0	0	0	0	0
1	0	0	0	0	0	0	0	0	0
0	0	0	0	0	0	0	0	0	0
0	0	0	0	0	0	0	0	0	0
0	0	0	0	0	0	0	0	0	0
0	0	0	0	0	0	0	0	0	0
0	0	0	0	0	0	0	0	0	0
0	0	0	0	0	0	0	0	0	0
0	0	0	0	0	0	0	0	0	0
0	0	0	0	0	0	0	0	0	0
0	0	0	0	0	0	0	0	0	0
0	0	0	0	0	0	0	0	0	0
0	0	0	0	0	0	0	0	0	0
0	0	0	0	0	0	0	0	0	0
0	0	0	0	0	0	0	0	0	0
0	0	0	0	0	0	0	0	0	0
0	0	0	0	0	0	0	0	0	0
0	0	0	0	0	0	0	0	0	0
0	0	0	0	0	0	0	0	0	0
0	0	0	0	0	0	0	0	0	0
0	0	0	0	0	0	0	0	0	0
0	0	0	0	0	0	0	0	0	0
0	0	0	0	0	0	0	0	0	0
0	0	0	0	0	0	0	0	0	0
0	0	0	0	0	0	0	0	0	0
0	0	0	0	0	0	0	0	0	0
0	0	0	0	0	0	0	0	0	0
0	0	0	0	0	0	0	0	0	0
0	0	0	0	0	0	0	0	0	0
0	0	0	0	0	0	0	0	0	0
0	0	0	0	0	0	0	0	0	0
0	0	0	0	0	0	0	0	0	0
0	0	0	0	0	0	0	0	0	0
0	0	0	0	0	0	0	0	0	0
0	0	0	0	0	0	0	0	0	0
0	0	0	0	0	0	0	0	0	0
0	0	0	0	0	0	0	0	0	0
0	0	0	0	0	0	0	0	0	0
0	0	0	0	0	0	0	0	0	0
0	0	0	0	0	0	0	0	0	0
0	0	0	0	0	0	0	0	0	0
0	0	0	0	0	0	0	0	0	0
0	0	0	0	0	0	0	0	0	0
0	1	0	0	0	0	0	0	0	0
0	0	0	0	0	0	0	0	0	0
0	0	0	0	0	0	0	0	0	0
0	0	0	0	0	0	0	0	0	0
0	0	0	1	0	0	0	0	0	0
0	1	0	0	0	0	0	0	0	0
0	0	0	0	0	0	0	0	0	0
0	0	0	0	0	0	0	0	0	0
0	0	0	0	0	0	0	0	0	0
0	0	0	0	0	0	0	0	0	0
0	0	0	0	0	0	0	0	0	0
0	0	0	0	0	0	0	0	0	0
0	0	0	0	0	0	0	0	0	0
0	0	0	0	0	0	0	0	0	0
0	0	0	0	0	0	0	0	0	0
0	0	0	0	0	0	0	0	0	0
0	0	0	0	0	0	0	0	0	0
0	0	0	0	0	0	0	0	0	0
0	0	0	0	0	0	0	1	0	0
0	0	0	0	0	0	0	0	0	0
0	0	0	0	0	1	0	0	0	0
0	0	0	0	0	0	0	0	0	0
0	0	0	0	0	0	0	0	0	0
0	1	0	0	0	0	0	0	0	0
0	0	0	0	0	0	0	0	0	0
0	1	0	0	0	0	0	0	0	0
0	0	0	0	0	0	0	0	0	0
0	0	0	0	0	0	0	0	0	0
0	0	0	0	0	0	0	0	0	0
0	0	0	0	0	0	0	0	0	0
0	0	0	0	0	0	0	0	0	0
0	0	0	0	0	0	0	0	0	0
0	0	0	0	0	0	0	0	0	0
0	0	0	0	0	0	0	0	0	0
0	0	0	0	0	0	0	0	0	0
0	0	0	0	0	0	0	0	0	0
0	1	0	0	0	0	0	0	0	0
0	0	0	0	0	0	0	0	0	0
0	0	0	0	0	0	0	0	0	0
0	0	0	0	0	0	0	0	0	0
0	0	0	0	0	0	0	0	0	0
0	0	0	0	0	0	0	0	0	0
0	0	0	0	0	0	0	0	0	0
0	0	0	0	0	0	0	0	0	0
0	0	0	0	0	0	0	0	0	0
0	0	0	0	0	0	0	0	0	0
0	0	0	0	0	0	0	0	0	0
0	0	0	0	0	0	0	0	0	0
0	0	0	0	0	0	0	0	0	0
0	0	0	0	0	0	0	0	0	0
0	0	0	0	0	0	0	0	0	0
0	0	0	0	0	0	0	0	0	0
0	0	0	0	0	0	0	0	0	0
0	0	0	0	0	0	0	0	0	0
0	0	0	0	0	0	0	0	0	0
0	0	0	0	0	0	0	0	0	0
0	0	0	0	0	0	0	0	0	0
0	0	0	0	0	0	0	0	0	0
0	0	0	0	0	0	0	0	0	0
0	0	0	0	0	0	0	0	0	0
0	0	0	0	0	0	0	0	0	0
0	0	0	0	0	0	0	0	0	0
0	0	0	0	0	0	0	0	0	0
0	0	0	0	0	0	0	0	0	0
0	0	0	0	0	0	0	0	0	0
0	0	0	0	0	0	0	0	0	0
0	0	0	0	0	0	0	0	0	0
0	0	0	0	0	0	0	0	0	0
0	0	0	0	0	0	0	0	0	0
0	0	0	0	0	0	0	0	0	0
0	0	0	0	0	0	0	0	0	0
0	0	0	0	0	0	0	0	0	0
0	0	0	0	0	0	0	0	0	0
0	0	0	0	0	0	0	0	0	0
0	0	0	0	0	0	0	0	0	0
0	0	0	1	0	0	0	0	0	0
0	0	0	0	0	0	0	0	0	0
0	0	0	0	0	0	0	0	0	0
0	0	0	0	0	0	0	0	0	0
0	0	0	0	0	0	0	0	0	0
0	0	0	0	0	0	0	0	0	0
0	0	0	0	0	0	0	0	0	0
1	0	0	0	0	0	0	0	0	0
0	0	0	0	0	0	0	0	0	0
0	0	0	0	0	0	0	0	0	0
0	0	0	0	0	0	0	0	0	0
0	0	0	0	0	0	0	0	0	0
0	0	0	0	0	0	0	0	0	0
0	0	0	0	0	0	0	0	0	0
0	0	0	0	0	0	0	0	0	0
0	0	0	0	0	1	0	0	0	0
0	0	0	0	0	0	0	0	0	0
0	0	0	0	0	0	1	0	0	0
0	0	0	0	0	0	0	0	0	0
0	0	0	0	0	0	0	0	0	0
0	0	0	0	0	0	0	0	0	0
0	0	0	0	0	0	0	0	0	0
0	0	0	0	0	0	0	0	0	0
0	0	0	0	0	0	0	0	0	0
0	0	0	0	0	0	0	0	0	0
0	0	0	0	0	0	0	0	0	0
0	0	0	0	0	0	0	0	0	0
0	0	0	0	0	0	0	0	0	0
0	0	0	0	0	0	0	0	0	0
0	0	0	0	0	0	0	0	0	0
0	0	0	0	0	0	0	0	0	0
0	0	0	0	0	0	0	0	0	0
0	0	0	0	0	0	0	0	0	0
0	0	0	0	0	0	0	0	0	0
0	0	0	0	0	0	0	0	0	0
0	0	0	0	0	0	0	0	0	0
0	0	0	0	0	0	0	0	0	0
0	0	0	0	0	0	0	0	0	0
0	0	0	0	0	0	0	0	0	0
0	0	0	0	0	0	0	0	0	0
0	0	0	0	0	0	0	0	0	0
0	0	0	0	0	0	0	0	1	0
0	0	0	0	0	0	0	0	0	0
0	0	0	0	0	0	0	0	0	0
0	0	0	0	0	0	0	0	0	0
0	0	0	0	0	0	0	0	0	0
0	0	0	0	0	0	0	0	0	0
0	0	0	0	0	0	0	0	0	0
0	0	0	0	0	0	0	0	0	0
0	0	0	0	0	0	0	0	0	0
0	0	0	0	0	0	0	0	0	0
0	0	0	0	0	0	0	0	0	0
0	0	0	0	0	0	0	0	0	0
0	0	0	0	0	0	0	0	0	0
0	0	0	0	0	0	0	0	0	0
0	0	0	0	0	0	0	0	0	0
0	0	0	0	0	0	0	0	0	0
0	0	0	0	1	0	0	0	0	0
0	0	0	0	0	0	0	0	0	0
0	0	0	0	0	0	0	0	0	0
0	0	0	0	0	0	0	1	0	0
0	0	0	0	0	0	0	0	0	0
0	0	0	0	0	0	0	0	0	0
0	0	0	0	0	0	0	0	0	0
0	0	0	0	0	0	0	0	0	0
0	0	0	0	0	0	0	0	0	0
0	0	0	0	0	0	0	0	0	0
0	0	0	0	0	0	0	0	0	0
0	0	0	0	0	0	0	0	0	0
0	0	0	0	0	0	0	0	0	0
0	0	0	0	0	0	0	0	0	0
0	0	0	0	0	0	0	0	0	0
0	0	0	0	0	0	0	0	0	0
0	0	0	0	0	0	0	0	0	0
0	0	0	0	0	0	0	0	0	0
0	0	0	0	0	0	0	0	0	0
0	0	0	0	0	0	0	0	0	0
0	0	0	0	0	0	0	0	0	0
0	0	0	0	0	0	0	0	0	0
0	0	0	0	0	0	0	0	0	0
0	0	0	0	0	0	0	0	0	0
0	0	0	0	0	0	0	0	0	0
0	0	0	0	0	0	0	0	0	0
0	0	0	0	0	0	0	0	0	0
0	0	0	0	0	0	0	0	0	0
0	0	0	0	0	0	0	0	0	0
0	0	0	0	0	0	0	0	0	0
0	0	0	0	0	0	0	0	0	0
0	0	0	0	0	0	0	0	0	0
0	0	0	0	0	0	0	0	0	0
0	0	0	0	0	0	0	0	0	0
0	0	0	0	0	0	0	0	0	0
0	0	0	0	0	0	0	0	0	0
0	0	0	0	0	0	0	0	0	0
0	0	0	0	0	0	0	0	0	0
0	0	0	0	0	0	0	0	0	0
0	0	0	0	0	0	0	0	0	0
0	0	0	0	0	0	0	0	0	0
0	0	0	0	0	0	0	0	0	0
0	0	0	0	0	0	0	0	0	0
0	0	0	0	0	0	0	0	0	0
0	0	0	0	0	0	0	0	0	0
0	0	0	0	0	0	0	0	0	0
0	1	0	0	0	0	0	0	0	0
0	0	0	0	0	0	0	0	0	0
0	0	0	0	0	0	0	0	0	0
0	0	0	0	0	0	0	0	0	0
0	0	0	0	0	0	0	0	1	0
0	0	0	0	0	0	0	1	0	0
0	0	0	0	0	0	0	0	0	0
0	0	0	0	0	0	0	0	0	0
0	0	0	0	0	0	0	0	0	0
0	0	0	0	0	0	0	0	0	0
0	0	0	0	0	0	0	1	0	0
0	0	0	0	0	0	0	0	0	0
0	0	0	0	0	0	0	0	0	0
0	0	0	0	0	0	0	0	0	0
0	0	0	0	0	0	0	0	0	0
0	0	0	0	0	0	0	0	0	0
0	0	0	0	0	0	0	0	0	0
0	0	0	0	0	0	0	0	0	0
0	0	0	0	0	0	0	0	0	0
0	0	0	0	0	0	0	0	0	0
0	0	0	0	0	0	0	0	0	0
0	0	0	0	0	0	0	0	0	0
0	0	0	0	0	0	0	0	0	0
0	0	0	0	0	0	0	0	1	0
0	0	0	0	0	0	0	1	0	0
0	0	0	0	0	0	0	0	0	0
0	0	0	0	0	0	0	0	0	0
0	0	0	0	0	0	0	0	0	0
0	0	0	0	0	0	0	0	0	0
0	0	0	0	0	0	0	0	0	0
0	0	0	0	0	0	0	0	0	0
0	0	0	0	0	0	0	0	0	0
0	1	0	0	0	0	0	0	0	0
0	0	0	0	0	0	0	0	0	0
0	0	0	0	0	0	0	0	0	0
0	0	0	0	0	0	0	0	0	0
0	0	0	0	0	0	0	0	0	0
0	0	0	0	0	0	0	0	0	0
0	0	0	0	0	0	1	0	0	0
0	0	0	0	0	0	0	0	0	0
0	0	0	0	0	0	0	0	0	0
0	0	0	0	0	0	0	0	0	0
0	0	0	0	0	0	0	0	0	0
0	0	0	0	0	0	0	0	0	0
0	0	0	0	0	0	0	0	0	0
0	0	0	0	0	0	0	0	0	0
0	0	0	0	0	0	0	0	0	0
0	0	0	0	0	0	0	0	0	0
0	0	0	0	0	0	0	0	0	0
0	0	0	0	0	0	0	0	0	0
0	0	0	0	0	0	0	0	0	0
0	0	0	0	0	0	0	0	0	0
0	0	0	0	0	0	0	0	0	0
0	0	0	0	0	0	0	0	0	0
0	0	0	0	0	0	0	0	0	0
1	0	0	0	0	0	0	0	0	0
0	0	0	0	0	0	0	0	0	0
0	0	0	0	0	0	0	0	0	0
0	0	0	0	0	0	0	0	0	0
0	0	0	0	0	0	0	0	0	0
0	0	0	0	0	0	0	0	0	0
0	0	0	0	0	0	0	0	0	0
0	0	0	0	0	0	0	0	0	0
0	0	0	0	0	0	0	0	0	0
0	0	0	0	0	0	0	0	0	0
0	0	0	0	0	0	0	0	0	0
0	0	0	0	0	0	0	0	0	1
0	0	0	0	0	0	0	0	0	0
0	0	0	0	0	0	0	0	0	0
0	0	0	0	0	0	0	0	0	0
0	0	0	0	0	0	0	0	0	0
0	0	0	0	0	0	0	0	0	0
0	0	0	0	0	0	0	0	0	0
0	0	0	0	0	0	0	0	0	0
0	0	0	0	0	0	0	0	0	0
0	0	0	0	0	0	0	0	0	0
0	0	0	0	0	0	0	0	0	0
0	0	0	0	0	0	0	0	0	0
0	0	0	0	0	0	0	0	0	0
0	0	0	0	0	0	0	0	0	0
0	0	0	0	0	0	0	0	0	0
0	0	0	0	0	0	0	0	0	0
0	0	0	0	0	0	0	0	0	0
0	0	0	0	0	0	0	0	0	0
0	0	0	0	0	1	0	0	0	0
0	0	0	0	0	0	0	0	0	0
0	0	0	0	0	0	0	0	0	0
0	0	0	0	0	0	0	0	0	0
0	0	0	0	0	0	0	0	0	0
0	0	0	0	1	0	0	0	0	0
0	0	0	0	0	1	0	0	0	0
0	0	0	0	0	1	0	0	0	0
0	0	0	0	0	0	0	0	0	0
0	0	0	0	0	0	0	0	0	0
0	0	0	0	0	0	0	0	0	0
0	0	0	0	0	0	0	0	0	0
0	0	1	0	0	0	0	0	0	0
0	0	0	0	0	0	0	0	0	0
0	0	0	0	0	0	0	0	0	0
0	0	0	0	0	0	0	0	0	0
0	0	0	0	0	0	0	0	0	0
0	0	0	0	0	0	0	0	0	0
0	0	0	0	0	0	0	0	0	0
0	0	0	0	0	0	0	0	0	0
0	0	0	0	0	0	0	0	0	0
0	0	0	0	0	0	0	0	0	0
0	0	0	0	0	0	0	0	0	0
0	0	0	0	0	0	0	0	0	0
0	0	0	0	0	0	0	0	0	0
0	0	0	0	0	0	0	0	0	0
0	0	0	0	0	0	0	0	0	0
0	0	0	0	0	0	0	0	0	0
0	0	0	0	0	0	0	0	0	0
0	0	0	0	0	0	0	0	0	0
0	0	0	0	0	0	0	0	0	0
0	0	0	0	0	0	0	0	0	0
0	0	0	0	0	0	0	0	0	0
0	0	0	0	0	1	0	0	0	0
0	0	0	0	0	0	0	0	0	0
0	0	0	0	0	0	0	0	0	0
0	0	0	0	0	0	0	0	0	0
0	0	0	0	0	0	0	0	0	0
0	0	0	0	0	0	0	0	0	0
0	0	1	0	0	0	0	0	0	0
0	0	0	0	0	0	0	0	0	0
0	0	0	0	0	0	0	0	0	0
0	0	0	0	0	0	0	0	0	0
0	0	0	0	0	0	0	0	0	0
0	0	0	0	0	0	0	0	0	0
0	0	0	0	0	0	0	0	0	0
0	1	0	0	0	0	0	0	0	0
0	0	0	0	0	0	0	0	0	0
0	0	0	0	0	0	0	0	0	0
0	0	0	0	0	0	0	0	0	0
0	0	0	0	0	0	0	0	0	0
0	0	0	0	0	0	0	0	0	1
0	0	0	0	0	0	0	0	0	0
0	0	0	0	0	0	0	0	0	0
0	0	0	0	0	0	0	0	0	0
0	0	0	0	0	0	0	0	0	0
0	0	0	0	0	0	0	0	0	0
0	0	0	0	0	0	0	0	0	0
0	0	0	0	0	0	0	0	0	0
0	0	0	0	0	0	0	0	0	0
0	0	0	0	0	0	0	0	0	0
0	0	0	0	0	0	0	0	0	0
0	0	0	0	0	0	0	0	0	0
0	0	0	0	0	0	0	0	0	0
0	0	0	0	0	0	0	0	0	0
0	1	0	0	0	0	0	0	0	1
0	0	0	0	0	0	0	0	0	0
0	0	0	0	0	0	0	0	0	0
0	0	0	0	0	0	0	0	0	0
0	0	0	0	0	0	0	0	0	0
0	0	0	0	0	0	0	0	0	0
0	1	0	0	0	0	0	0	0	0
0	0	0	0	0	0	0	0	0	0
0	0	0	0	0	0	0	0	0	0
0	0	0	0	1	0	0	0	0	0
0	0	0	0	0	0	0	0	0	0
0	0	0	0	0	0	0	0	0	0
0	0	0	0	0	0	0	0	0	0
0	0	0	0	0	0	0	0	0	0
0	0	0	0	0	0	0	0	0	0
0	0	0	0	0	0	0	0	0	0
0	0	0	0	0	0	0	0	0	0
0	0	1	0	0	0	0	0	0	0
0	0	0	0	0	0	0	0	0	0
0	0	0	0	0	0	0	0	1	0
1	0	0	0	0	0	0	0	0	0
0	0	0	0	0	0	0	0	0	0
0	0	0	0	0	0	1	0	0	0
0	0	0	0	0	0	0	0	0	0
0	0	0	0	0	0	0	0	0	0
0	0	0	0	0	0	0	0	0	0
0	0	0	0	0	0	0	0	0	0
0	0	0	0	0	0	0	0	0	0
0	0	1	0	0	0	0	0	0	0
0	0	0	0	0	0	0	0	0	0
0	0	0	0	0	0	0	0	0	0
0	0	0	1	0	0	0	0	0	0
0	0	0	0	0	0	0	1	0	0
0	0	0	0	0	0	0	0	0	0
0	0	0	0	0	0	0	0	0	0
0	0	0	0	0	0	0	0	0	0
0	0	0	0	0	0	0	0	0	0
0	0	0	0	0	0	0	0	0	0
0	0	0	0	0	0	0	0	0	0
0	0	0	0	0	0	0	0	0	0
1	0	0	0	0	0	0	0	0	0
0	0	0	0	0	0	0	0	0	0
0	0	0	0	0	0	0	0	0	0
0	0	0	0	0	0	0	0	0	0
0	0	0	0	0	0	0	0	0	0
0	0	0	0	0	0	0	0	0	0
0	0	1	0	0	0	0	0	0	0
0	0	0	0	0	0	0	0	0	0
0	0	0	0	0	0	0	0	0	0
1	0	0	0	0	0	0	0	0	0
0	0	0	0	0	0	0	0	0	0
0	0	0	0	0	0	0	0	0	0
0	0	0	0	0	0	0	0	0	0
0	0	0	0	0	0	0	0	0	0
0	0	0	0	0	0	0	1	0	0
0	0	0	1	0	0	0	0	0	0
0	0	0	0	0	0	0	0	0	0
0	0	0	0	0	0	0	0	0	0
0	0	0	0	0	0	0	0	0	0
0	0	0	0	0	0	0	0	0	0
0	0	0	0	0	0	0	0	0	0
0	0	0	0	0	0	0	0	0	0
0	0	0	0	0	0	0	0	0	0
0	0	0	0	0	0	0	0	0	0
0	0	0	0	0	0	0	0	0	0
0	0	0	0	0	0	0	0	0	0
0	0	0	0	0	0	0	0	0	0
0	0	0	0	1	0	0	0	0	0
0	0	0	0	0	0	0	0	0	0
0	0	0	0	0	0	0	0	0	0
0	0	0	0	0	0	0	0	0	0
0	0	0	0	0	1	0	0	0	0
0	0	0	0	0	0	0	0	0	0
0	0	0	0	1	0	0	0	0	0
0	0	0	0	0	0	0	0	0	0
0	0	0	0	0	0	0	0	0	0
0	0	1	0	0	0	0	0	0	0
0	0	0	0	1	0	0	0	0	0
0	0	0	0	0	0	0	0	0	0
0	0	0	0	0	0	0	0	0	0
0	0	1	0	0	0	0	0	0	0
0	0	0	0	0	0	0	0	0	0
0	0	0	0	0	0	0	0	0	0
0	0	0	0	0	0	0	0	0	0
0	0	0	0	0	0	0	0	0	0
0	0	0	0	0	0	0	0	0	0
0	0	0	0	0	0	0	0	0	0
0	0	0	0	0	0	0	0	1	0
0	0	0	0	0	0	0	0	0	0
0	0	0	0	0	0	0	0	0	0
0	0	0	0	0	0	0	0	0	0
0	0	0	0	0	0	0	0	0	0
0	0	0	0	0	0	0	0	0	0
0	0	0	0	0	0	0	0	0	0
0	0	0	0	0	0	0	0	0	0
0	0	0	0	0	0	0	0	0	0
0	0	0	0	0	0	0	0	0	0
0	0	0	0	0	0	0	0	0	0
0	0	0	0	0	0	0	0	0	0
0	0	0	0	0	0	0	0	0	0
0	0	0	0	0	0	0	0	0	0
0	0	0	0	0	0	0	0	0	0
0	0	0	0	0	0	0	0	0	0
0	0	0	0	0	0	0	0	0	0
0	0	0	0	0	0	0	0	0	0
0	0	0	0	0	0	0	0	0	0
0	0	0	0	0	0	0	1	0	0
0	0	0	0	0	0	0	0	0	0
0	0	0	0	0	0	0	0	0	0
0	0	0	0	0	0	0	0	0	0
1	0	0	0	0	0	0	0	0	0
0	0	0	0	0	0	0	0	0	1
0	0	0	0	0	0	0	0	0	0
0	0	0	0	0	0	0	0	0	0
0	0	0	0	0	0	0	0	0	0
0	0	0	0	0	0	0	0	0	0
0	0	0	0	0	0	0	0	0	0
0	0	0	0	0	0	0	0	0	0
0	1	0	0	0	0	0	0	0	0
0	0	0	0	0	0	0	0	0	0
0	1	0	0	0	0	0	0	0	0
0	0	0	0	0	0	0	0	0	0
0	0	0	0	0	0	0	0	0	0
0	0	0	0	0	0	0	0	0	0
0	0	0	0	0	0	0	0	0	0
0	0	0	0	0	0	0	0	0	0
0	0	0	0	0	0	0	0	0	0
0	0	0	0	0	0	0	1	0	0
0	0	1	0	0	0	0	0	0	0
0	0	0	0	0	0	0	0	0	0
0	0	0	0	0	0	0	0	0	0

## Sheet: together
steps	25th	50th	75th	25th	50th	75th	25th	50th	75th
100	0	0	0	0	0	0	0	0	0
200	0	0	0	0	0	0	0	0	0
300	0	0	0	0	0	0	0	0	0
400	0	0	0	0	0	0	0	0	0
500	0	0	0	0	0	0	0	0	0
600	0	0	0	0	0	0	0	0	0
700	0	0	0	0	0	0	0	0	0
800	0	0	0	0	0	0	0	0	0
900	0	0	0	0	0	0	0	0	0
1000	0	0	0	0	0	0	0	0	0
1100	0	0	0	0	0	0	0	0	0
1200	0	0	0	0	0	0	0	0	0
1300	0	0	0	0	0	0	0	0	0
1400	0	0	0	0	0	0	0	0	0
1500	0	0	0	0	0	0	0	0	0
1600	0	0	0	0	0	0	0	0	0
1700	0	0	0	0	0	0	0	0	0
1800	0	0	0	0	0	0	0	0	0
1900	0	0	0	0	0	0	0	0	0
2000	0	0	0	0	0	0	0	0	0
2100	0	0	0	0	0	0	0	0	0
2200	0	0	0	0	0	0	0	0	0
2300	0	0	0	0	0	0	0	0	0
2400	0	0	0	0	0	0	0	0	0
2500	0	0	0	0	0	0	0	0	0
2600	0	0	0	0	0	0	0	0	0
2700	0	0	0	0	0	0	0	0	0
2800	0	0	0	0	0	0	0	0	0
2900	0	0	0	0	0	0	0	0	0
3000	0	0	0	0	0	0	0	0	0
3100	0	0	0	0	0	0	0	0	0
3200	0	0	0	0	0	0	0	0	0
3300	0	0	0	0	0	0	0	0	0
3400	0	0	0	0	0	0	0	0	0
3500	0	0	0	0	0	0	0	0	0
3600	0	0	0	0	0	0	0	0	0
3700	0	0	0	0	0	0	0	0	0
3800	0	0	0	0	0	0	0	0	0
3900	0	0	0	0	0	0	0	0	0
4000	0	0	0	0	0	0	0	0	0
4100	0	0	0	0	0	0	0	0	0
4200	0	0	0	0	0	0	0	0	0
4300	0	0	0	0	0	0	0	0	0
4400	0	0	0	0	0	0	0	0	0
4500	0	0	0	0	0	0	0	0	0
4600	0	0	0	0	0	0	0	0	0
4700	0	0	0	0	0	0	0	0	0
4800	0	0	0	0	0	0	0	0	0
4900	0	0	0	0	0	0	0	0	0
5000	0	0	0	0	0	0	0	0	0
5100	0	0	0	0	0	0	0	0	0
5200	0	0	0	0	0	0	0	0	0
5300	0	0	0	0	0	0	0	0	0
5400	0	0	0	0	0	0	0	0	0
5500	0	0	0	0	0	0	0	0	0
5600	0	0	0	0	0	0	0	0	0
5700	0	0	0	0	0	0	0	0	0
5800	0	0	0	0	0	0	0	0	0
5900	0	0	0	0	0	0	0	0	0
6000	0	0	0	0	0	0	0	0	0
6100	0	0	0	0	0	0	0	0	0
6200	0	0	0	0	0	0	0	0	0
6300	0	0	0	0	0	0	0	0	0
6400	0	0	0	0	0	0	0	0	0
6500	0	0	0	0	0	0	0	0	0
6600	0	0	0	0	0	0	0	0	0
6700	0	0	0	0	0	0	0	0	0
6800	0	0	0	0	0	0	0	0	0
6900	0	0	0	0	0	0	0	0	0
7000	0	0	0	0	0	0	0	0	0
7100	0	0	0	0	0	0	0	0	0
7200	0	0	0	0	0	0	0	0	0
7300	0	0	0	0	0	0	0	0	0
7400	0	0	0	0	0	0	0	0	0
7500	0	0	0	0	0	0	0	0	0
7600	0	0	0	0	0	0	0	0	0
7700	0	0	0	0	0	0	0	0	0
7800	0	0	0	0	0	0	0	0	0
7900	0	0	0	0	0	0	0	0	0
8000	0	0	0	0	0	0	0	0	0
8100	0	0	0	0	0	0	0	0	0
8200	0	0	0	0	0	0	0	0	0
8300	0	0	0	0	0	0	0	0	0
8400	0	0	0	0	0	0	0	0	0
8500	0	0	0	0	0	0	0	0	0
8600	0	0	0	0	0	0	0	0	0
8700	0	0	0	0	0	0	0	0	0
8800	0	0	0	0	0	0	0	0	0
8900	0	0	0	0	0	0	0	0	0
9000	0	0	0	0	0	0	0	0	0
9100	0	0	0	0	0	0	0	0	0
9200	0	0	0	0	0	0	0	0	0
9300	0	0	0	0	0	0	0	0	0
9400	0	0	0	0	0	0	0	0	0
9500	0	0	0	0	0	0	0	0	0
9600	0	0	0	0	0	0	0	0	0
9700	0	0	0	0	0	0	0	0	0
9800	0	0	0	0	0	0	0	0	0
9900	0	0	0	0	0	0	0	0	0
10000	0	0	0	0	0	0	0	0	0
10100	0	0	0	0	0	0	0	0	0
10200	0	0	0	0	0	0	0	0	0
10300	0	0	0	0	0	0	0	0	0
10400	0	0	0	0	0	0	0	0	0
10500	0	0	0	0	0	0	0	0	0
10600	0	0	0	0	0	0	0	0	0
10700	0	0	0	0	0	0	0	0	0
10800	0	0	0	0	0	0	0	0	0
10900	0	0	0	0	0	0	0	0	0
11000	0	0	0	0	0	0	0	0	0
11100	0	0	0	0	0	0	0	0	0
11200	0	0	0	0	0	0	0	0	0
11300	0	0	0	0	0	0	0	0	0
11400	0	0	0	0	0	0	0	0	0
11500	0	0	0	0	0	0	0	0	0
11600	0	0	0	0	0	0	0	0	0
11700	0	0	0	0	0	0	0	0	0
11800	0	0	0	0	0	0	0	0	0
11900	0	0	0	0	0	0	0	0	0
12000	0	0	0	0	0	0	0	0	0
12100	0	0	0	0	0	0	0	0	0
12200	0	0	0	0	0	0	0	0	0
12300	0	0	0	0	0	0	0	0	0
12400	0	0	0	0	0	0	0	0	0
12500	0	0	0	0	0	0	0	0	0
12600	0	0	0	0	0	0	0	0	0
12700	0	0	0	0	0	0	0	0	0
12800	0	0	0	0	0	0	0	0	0
12900	0	0	0	0	0	0	0	0	0
13000	0	0	0	0	0	0	0	0	0
13100	0	0	0	0	0	0	0	0	0
13200	0	0	0	0	0	0	0	0	0
13300	0	0	0	0	0	0	0	0	0
13400	0	0	0	0	0	0	0	0	0
13500	0	0	0	0	0	0	0	0	0
13600	0	0	0	0	0	0	0	0	0
13700	0	0	0	0	0	0	0	0	0
13800	0	0	0	0	0	0	0	0	0
13900	0	0	0	0	0	0	0	0	0
14000	0	0	0	0	0	0	0	0	0
14100	0	0	0	0	0	0	0	0	0
14200	0	0	0	0	0	0	0	0	0
14300	0	0	0	0	0	0	0	0	0
14400	0	0	0	0	0	0	0	0	0
14500	0	0	0	0	0	0	0	0	0
14600	0	0	0	0	0	0	0	0	0
14700	0	0	0	0	0	0	0	0	0
14800	0	0	0	0	0	0	0	0	0
14900	0	0	0	0	0	0	0	0	0
15000	0	0	0	0	0	0	0	0	0
15100	0	0	0	0	0	0	0	0	0
15200	0	0	0	0	0	0	0	0	0
15300	0	0	0	0	0	0	0	0	0
15400	0	0	0	0	0	0	0	0	0
15500	0	0	0	0	0	0	0	0	0
15600	0	0	0	0	0	0	0	0	0
15700	0	0	0	0	0	0	0	0	0
15800	0	0	0	0	0	0	0	0	0
15900	0	0	0	0	0	0	0	0	0
16000	0	0	0	0	0	0	0	0	0
16100	0	0	0	0	0	0	0	0	0
16200	0	0	0	0	0	0	0	0	0
16300	0	0	0	0	0	0	0	0	0
16400	0	0	0	0	0	0	0	0	0
16500	0	0	0	0	0	0	0	0	0
16600	0	0	0	0	0	0	0	0	0
16700	0	0	0	0	0	0	0	0	0
16800	0	0	0	0	0	0	0	0	0
16900	0	0	0	0	0	0	0	0	0
17000	0	0	0	0	0	0	0	0	0
17100	0	0	0	0	0	0	0	0	0
17200	0	0	0	0	0	0	0	0	0
17300	0	0	0	0	0	0	0	0	0
17400	0	0	0	0	0	0	0	0	0
17500	0	0	0	0	0	0	0	0	0
17600	0	0	0	0	0	0	0	0	0
17700	0	0	0	0	0	0	0	0	0
17800	0	0	0	0	0	0	0	0	0
17900	0	0	0	0	0	0	0	0	0
18000	0	0	0	0	0	0	0	0	0
18100	0	0	0	0	0	0	0	0	0
18200	0	0	0	0	0	0	0	0	0
18300	0	0	0	0	0	0	0	0	0
18400	0	0	0	0	0	0	0	0	0
18500	0	0	0	0	0	0	0	0	0
18600	0	0	0	0	0	0	0	0	0
18700	0	0	0	0	0	0	0	0	0
18800	0	0	0	0	0	0	0	0	0
18900	0	0	0	0	0	0	0	0	0
19000	0	0	0	0	0	0	0	0	0
19100	0	0	0	0	0	0	0	0	0
19200	0	0	0	0	0	0	0	0	0
19300	0	0	0	0	0	0	0	0	0
19400	0	0	0	0	0	0	0	0	0
19500	0	0	0	0	0	0	0	0	0
19600	0	0	0	0	0	0	0	0	0
19700	0	0	0	0	0	0	0	0	0
19800	0	0	0	0	0	0	0	0	0
19900	0	0	0	0	0	0	0	0	0
20000	0	0	0	0	0	0	0	0	0
20100	0	0	0	0	0	0	0	0	0
20200	0	0	0	0	0	0	0	0	0
20300	0	0	0	0	0	0	0	0	0
20400	0	0	0	0	0	0	0	0	0
20500	0	0	0	0	0	0	0	0	0
20600	0	0	0	0	0	0	0	0	0
20700	0	0	0	0	0	0	0	0	0
20800	0	0	0	0	0	0	0	0	0
20900	0	0	0	0	0	0	0	0	0
21000	0	0	0	0	0	0	0	0	0
21100	0	0	0	0	0	0	0	0	0
21200	0	0	0	0	0	0	0	0	0
21300	0	0	0	0	0	0	0	0	0
21400	0	0	0	0	0	0	0	0	0
21500	0	0	0	0	0	0	0	0	0
21600	0	0	0	0	0	0	0	0	0
21700	0	0	0	0	0	0	0	0	0
21800	0	0	0	0	0	0	0	0	0
21900	0	0	0	0	0	0	0	0	0
22000	0	0	0	0	0	0	0	0	0
22100	0	0	0	0	0	0	0	0	0
22200	0	0	0	0	0	0	0	0	0
22300	0	0	0	0	0	0	0	0	0
22400	0	0	0	0	0	0	0	0	0
22500	0	0	0	0	0	0	0	0	0
22600	0	0	0	0	0	0	0	0	0
22700	0	0	0	0	0	0	0	0	0
22800	0	0	0	0	0	0	0	0	0
22900	0	0	0	0	0	0	0	0	0
23000	0	0	0	0	0	0	0	0	0
23100	0	0	0	0	0	0	0	0	0
23200	0	0	0	0	0	0	0	0	0
23300	0	0	0	0	0	0	0	0	0
23400	0	0	0	0	0	0	0	0	0
23500	0	0	0	0	0	0	0	0	0
23600	0	0	0	0	0	0	0	0	0
23700	0	0	0	0	0	0	0	0	0
23800	0	0	0	0	0	0	0	0	0
23900	0	0	0	0	0	0	0	0	0
24000	0	0	0	0	0	0	0	0	0
24100	0	0	0	0	0	0	0	0	0
24200	0	0	0	0	0	0	0	0	0
24300	0	0	0	0	0	0	0	0	0
24400	0	0	0	0	0	0	0	0	0
24500	0	0	0	0	0	0	0	0	0
24600	0	0	0	0	0	0	0	0	0
24700	0	0	0	0	0	0	0	0	0
24800	0	0	0	0	0	0	0	0	0
24900	0	0	0	0	0	0	0	0	0
25000	0	0	0	0	0	0	0	0	0
25100	0	0	0	0	0	0	0	0	0
25200	0	0	0	0	0	0	0	0	0
25300	0	0	0	0	0	0	0	0	0
25400	0	0	0	0	0	0	0	0	0
25500	0	0	0	0	0	0	0	0	0
25600	0	0	0	0	0	0	0	0	0
25700	0	0	0	0	0	0	0	0	0
25800	0	0	0	0	0	0	0	0	0
25900	0	0	0	0	0	0	0	0	0
26000	0	0	0	0	0	0	0	0	0
26100	0	0	0	0	0	0	0	0	0
26200	0	0	0	0	0	0	0	0	0
26300	0	0	0	0	0	0	0	0	0
26400	0	0	0	0	0	0	0	0	0
26500	0	0	0	0	0	0	0	0	0
26600	0	0	0	0	0	0	0	0	0
26700	0	0	0	0	0	0	0	0	0
26800	0	0	0	0	0	0	0	0	0
26900	0	0	0	0	0	0	0	0	0
27000	0	0	0	0	0	0	0	0	0
27100	0	0	0	0	0	0	0	0	0
27200	0	0	0	0	0	0	0	0	0
27300	0	0	0	0	0	0	0	0	0
27400	0	0	0	0	0	0	0	0	0
27500	0	0	0	0	0	0	0	0	0
27600	0	0	0	0	0	0	0	0	0
27700	0	0	0	0	0	0	0	0	0
27800	0	0	0	0	0	0	0	0	0
27900	0	0	0	0	0	0	0	0	0
28000	0	0	0	0	0	0	0	0	0
28100	0	0	0	0	0	0	0	0	0
28200	0	0	0	0	0	0	0	0	0
28300	0	0	0	0	0	0	0	0	0
28400	0	0	0	0	0	0	0	0	0
28500	0	0	0	0	0	0	0	0	0
28600	0	0	0	0	0	0	0	0	0
28700	0	0	0	0	0	0	0	0	0
28800	0	0	0	0	0	0	0	0	0
28900	0	0	0	0	0	0	0	0	0
29000	0	0	0	0	0	0	0	0	0
29100	0	0	0	0	0	0	0	0	0
29200	0	0	0	0	0	0	0	0	0
29300	0	0	0	0	0	0	0	0	0
29400	0	0	0	0	0	0	0	0	0
29500	0	0	0	0	0	0	0	0	0
29600	0	0	0	0	0	0	0	0	0
29700	0	0	0	0	0	0	0	0	0
29800	0	0	0	0	0	0	0	0	0
29900	0	0	0	0	0	0	0	0	0
30000	0	0	0	0	0	0	0	0	0
30100	0	0	0	0	0	0	0	0	0
30200	0	0	0	0	0	0	0	0	0
30300	0	0	0	0	0	0	0	0	0
30400	0	0	0	0	0	0	0	0	0
30500	0	0	0	0	0	0	0	0	0
30600	0	0	0	0	0	0	0	0	0
30700	0	0	0	0	0	0	0	0	0
30800	0	0	0	0	0	0	0	0	0
30900	0	0	0	0	0	0	0	0	0
31000	0	0	0	0	0	0	0	0	0
31100	0	0	0	0	0	0	0	0	0
31200	0	0	0	0	0	0	0	0	0
31300	0	0	0	0	0	0	0	0	0
31400	0	0	0	0	0	0	0	0	0
31500	0	0	0	0	0	0	0	0	0
31600	0	0	0	0	0	0	0	0	0
31700	0	0	0	0	0	0	0	0	0
31800	0	0	0	0	0	0	0	0	0
31900	0	0	0	0	0	0	0	0	0
32000	0	0	0	0	0	0	0	0	0
32100	0	0	0	0	0	0	0	0	0
32200	0	0	0	0	0	0	0	0	0
32300	0	0	0	0	0	0	0	0	0
32400	0	0	0	0	0	0	0	0	0
32500	0	0	0	0	0	0	0	0	0
32600	0	0	0	0	0	0	0	0	0
32700	0	0	0	0	0	0	0	0	0
32800	0	0	0	0	0	0	0	0	0
32900	0	0	0	0	0	0	0	0	0
33000	0	0	0	0	0	0	0	0	0
33100	0	0	0	0	0	0	0	0	0
33200	0	0	0	0	0	0	0	0	0
33300	0	0	0	0	0	0	0	0	0
33400	0	0	0	0	0	0	0	0	0
33500	0	0	0	0	0	0	0	0	0
33600	0	0	0	0	0	0	0	0	0
33700	0	0	0	0	0	0	0	0	0
33800	0	0	0	0	0	0	0	0	0
33900	0	0	0	0	0	0	0	0	0
34000	0	0	0	0	0	0	0	0	0
34100	0	0	0	0	0	0	0	0	0
34200	0	0	0	0	0	0	0	0	0
34300	0	0	0	0	0	0	0	0	0
34400	0	0	0	0	0	0	0	0	0
34500	0	0	0	0	0	0	0	0	0
34600	0	0	0	0	0	0	0	0	0
34700	0	0	0	0	0	0	0	0	0
34800	0	0	0	0	0	0	0	0	0
34900	0	0	0	0	0	0	0	0	0
35000	0	0	0	0	0	0	0	0	0
35100	0	0	0	0	0	0	0	0	0
35200	0	0	0	0	0	0	0	0	0
35300	0	0	0	0	0	0	0	0	0
35400	0	0	0	0	0	0	0	0	0
35500	0	0	0	0	0	0	0	0	0
35600	0	0	0	0	0	0	0	0	0
35700	0	0	0	0	0	0	0	0	0
35800	0	0	0	0	0	0	0	0	0
35900	0	0	0	0	0	0	0	0	0
36000	0	0	0	0	0	0	0	0	0
36100	0	0	0	0	0	0	0	0	0
36200	0	0	0	0	0	0	0	0	0
36300	0	0	0	0	0	0	0	0	0
36400	0	0	0	0	0	0	0	0	0
36500	0	0	0	0	0	0	0	0	0
36600	0	0	0	0	0	0	0	0	0
36700	0	0	0	0	0	0	0	0	0
36800	0	0	0	0	0	0	0	0	0
36900	0	0	0	0	0	0	0	0	0
37000	0	0	0	0	0	0	0	0	0
37100	0	0	0	0	0	0	0	0	0
37200	0	0	0	0	0	0	0	0	0
37300	0	0	0	0	0	0	0	0	0
37400	0	0	0	0	0	0	0	0	0
37500	0	0	0	0	0	0	0	0	0
37600	0	0	0	0	0	0	0	0	0
37700	0	0	0	0	0	0	0	0	0
37800	0	0	0	0	0	0	0	0	0
37900	0	0	0	0	0	0	0	0	0
38000	0	0	0	0	0	0	0	0	0
38100	0	0	0	0	0	0	0	0	0
38200	0	0	0	0	0	0	0	0	0
38300	0	0	0	0	0	0	0	0	0
38400	0	0	0	0	0	0	0	0	0
38500	0	0	0	0	0	0	0	0	0
38600	0	0	0	0	0	0	0	0	0
38700	0	0	0	0	0	0	0	0	0
38800	0	0	0	0	0	0	0	0	0
38900	0	0	0	0	0	0	0	0	0
39000	0	0	0	0	0	0	0	0	0
39100	0	0	0	0	0	0	0	0	0
39200	0	0	0	0	0	0	0	0	0
39300	0	0	0	0	0	0	0	0	0
39400	0	0	0	0	0	0	0	0	0
39500	0	0	0	0	0	0	0	0	0
39600	0	0	0	0	0	0	0	0	0
39700	0	0	0	0	0	0	0	0	0
39800	0	0	0	0	0	0	0	0	0
39900	0	0	0	0	0	0	0	0	0
40000	0	0	0	0	0	0	0	0	0
40100	0	0	0	0	0	0	0	0	0
40200	0	0	0	0	0	0	0	0	0
40300	0	0	0	0	0	0	0	0	0
40400	0	0	0	0	0	0	0	0	0
40500	0	0	0	0	0	0	0	0	0
40600	0	0	0	0	0	0	0	0	0
40700	0	0	0	0	0	0	0	0	0
40800	0	0	0	0	0	0	0	0	0
40900	0	0	0	0	0	0	0	0	0
41000	0	0	0	0	0	0	0	0	0
41100	0	0	0	0	0	0	0	0	0
41200	0	0	0	0	0	0	0	0	0
41300	0	0	0	0	0	0	0	0	0
41400	0	0	0	0	0	0	0	0	0
41500	0	0	0	0	0	0	0	0	0
41600	0	0	0	0	0	0	0	0	0
41700	0	0	0	0	0	0	0	0	0
41800	0	0	0	0	0	0	0	0	0
41900	0	0	0	0	0	0	0	0	0
42000	0	0	0	0	0	0	0	0	0
42100	0	0	0	0	0	0	0	0	0
42200	0	0	0	0	0	0	0	0	0
42300	0	0	0	0	0	0	0	0	0
42400	0	0	0	0	0	0	0	0	0
42500	0	0	0	0	0	0	0	0	0
42600	0	0	0	0	0	0	0	0	0
42700	0	0	0	0	0	0	0	0	0
42800	0	0	0	0	0	0	0	0	0
42900	0	0	0	0	0	0	0	0	0
43000	0	0	0	0	0	0	0	0	0
43100	0	0	0	0	0	0	0	0	0
43200	0	0	0	0	0	0	0	0	0
43300	0	0	0	0	0	0	0	0	0
43400	0	0	0	0	0	0	0	0	0
43500	0	0	0	0	0	0	0	0	0
43600	0	0	0	0	0	0	0	0	0
43700	0	0	0	0	0	0	0	0	0
43800	0	0	0	0	0	0	0	0	0
43900	0	0	0	0	0	0	0	0	0
44000	0	0	0	0	0	0	0	0	0
44100	0	0	0	0	0	0	0	0	0
44200	0	0	0	0	0	0	0	0	0
44300	0	0	0	0	0	0	0	0	0
44400	0	0	0	0	0	0	0	0	0
44500	0	0	0	0	0	0	0	0	0
44600	0	0	0	0	0	0	0	0	0
44700	0	0	0	0	0	0	0	0	0
44800	0	0	0	0	0	0	0	0	0
44900	0	0	0	0	0	0	0	0	0
45000	0	0	0	0	0	0	0	0	0
45100	0	0	0	0	0	0	0	0	0
45200	0	0	0	0	0	0	0	0	0
45300	0	0	0	0	0	0	0	0	0
45400	0	0	0	0	0	0	0	0	0
45500	0	0	0	0	0	0	0	0	0
45600	0	0	0	0	0	0	0	0	0
45700	0	0	0	0	0	0	0	0	0
45800	0	0	0	0	0	0	0	0	0
45900	0	0	0	0	0	0	0	0	0
46000	0	0	0	0	0	0	0	0	0
46100	0	0	0	0	0	0	0	0	0
46200	0	0	0	0	0	0	0	0	0
46300	0	0	0	0	0	0	0	0	0
46400	0	0	0	0	0	0	0	0	0
46500	0	0	0	0	0	0	0	0	0
46600	0	0	0	0	0	0	0	0	0
46700	0	0	0	0	0	0	0	0	0
46800	0	0	0	0	0	0	0	0	0
46900	0	0	0	0	0	0	0	0	0
47000	0	0	0	0	0	0	0	0	0
47100	0	0	0	0	0	0	0	0	0
47200	0	0	0	0	0	0	0	0	0
47300	0	0	0	0	0	0	0	0	0
47400	0	0	0	0	0	0	0	0	0
47500	0	0	0	0	0	0	0	0	0
47600	0	0	0	0	0	0	0	0	0
47700	0	0	0	0	0	0	0	0	0
47800	0	0	0	0	0	0	0	0	0
47900	0	0	0	0	0	0	0	0	0
48000	0	0	0	0	0	0	0	0	0
48100	0	0	0	0	0	0	0	0	0
48200	0	0	0	0	0	0	0	0	0
48300	0	0	0	0	0	0	0	0	0
48400	0	0	0	0	0	0	0	0	0
48500	0	0	0	0	0	0	0	0	0
48600	0	0	0	0	0	0	0	0	0
48700	0	0	0	0	0	0	0	0	0
48800	0	0	0	0	0	0	0	0	0
48900	0	0	0	0	0	0	0	0	0
49000	0	0	0	0	0	0	0	0	0
49100	0	0	0	0	0	0	0	0	0
49200	0	0	0	0	0	0	0	0	0
49300	0	0	0	0	0	0	0	0	0
49400	0	0	0	0	0	0	0	0	0
49500	0	0	0	0	0	0	0	0	0
49600	0	0	0	0	0	0	0	0	0
49700	0	0	0	0	0	0	0	0	0
49800	0	0	0	0	0	0	0	0	0
49900	0	0	0	0	0	0	0	0	0
50000	0	0	0	0	0	0	0	0	0
50100	0	0	0	0	0	0	0	0	0
50200	0	0	0	0	0	0	0	0	0
50300	0	0	0.75	0	0	0	0	0	0
50400	0	0	0	0	0	0	0	0	0
50500	0	0	0	0	0	0	0	0	0
50600	0	0	0	0	0	0	0	0	0
50700	0	0	0	0	0	0	0	0	0
50800	0	0	0	0	0	0	0	0	0
50900	0	0	0.75	0	0	0	0	0	0
51000	0	0	0.75	0	0	0	0	0	0
51100	0	0	0.75	0	0	0	0	0	0
51200	0	0	0.75	0	0	0	0	0	0
51300	0	0	0.75	0	0	0	0	0	0
51400	0	0	0.75	0	0	0	0	0	0
51500	0	0	0.75	0	0	0	0	0	0
51600	0	0	0.75	0	0	0	0	0	0
51700	0	0	0.75	0	0	0	0	0	0
51800	0	0	0.75	0	0	0	0	0	0
51900	0	0	0	0	0	0	0	0	0
52000	0	0	0	0	0	0	0	0	0
52100	0	0	0	0	0	0	0	0	0
52200	0	0	0	0	0	0	0	0	0
52300	0	0	0	0	0	0	0	0	0
52400	0	0	0	0	0	0	0	0	0
52500	0	0	0	0	0	0.75	0	0	0
52600	0	0	0	0	0	0	0	0	0
52700	0	0	0	0	0	0	0	0	0
52800	0	0	0	0	0	0	0	0	0
52900	0	0	0	0	0	0	0	0	0
53000	0	0	0	0	0	0	0	0	0
53100	0	0	0	0	0	0	0	0	0
53200	0	0	0	0	0	0	0	0	0
53300	0	0	0	0	0	0	0	0	0
53400	0	0	0	0	0	0	0	0	0
53500	0	0	0	0	0	0	0	0	0
53600	0	0	0.75	0	0	0	0	0	0
53700	0	0	0	0	0	0	0	0	0
53800	0	0	0.75	0	0	0	0	0	0
53900	0	0	0.75	0	0	0	0	0	0
54000	0	0	0.75	0	0	0	0	0	0
54100	0	0	0.75	0	0	0	0	0	0
54200	0	0	0.75	0	0	0	0	0	0
54300	0	0	0.75	0	0	0	0	0	0
54400	0	0	0.75	0	0	0	0	0	0
54500	0	0	0.75	0	0	0	0	0	0
54600	0	0	0.75	0	0	0	0	0	0
54700	0	0	0.75	0	0	0	0	0	0
54800	0	0	0.75	0	0	0	0	0	0
54900	0	0	0.75	0	0	0	0	0	0
55000	0	0	0	0	0	0	0	0	0
55100	0	0	0	0	0	0	0	0	0
55200	0	0	0	0	0	0	0	0	0
55300	0	0	0	0	0	0	0	0	0
55400	0	0	0	0	0	0	0	0	0
55500	0	0	0	0	0	0	0	0	0
55600	0	0	0	0	0	0	0	0	0
55700	0	0	0	0	0	0	0	0	0
55800	0	0	0	0	0	0	0	0	0
55900	0	0	0	0	0	0	0	0	0
56000	0	0	0	0	0	0	0	0	0
56100	0	0	0	0	0	0	0	0	0
56200	0	0	0	0	0	0	0	0	0
56300	0	0	0	0	0	0	0	0	0
56400	0	0	0	0	0	0	0	0	0
56500	0	0	0	0	0	0	0	0	0
56600	0	0	0	0	0	0	0	0	0
56700	0	0	0	0	0	0	0	0	0
56800	0	0	0.75	0	0	0	0	0	0
56900	0	0	0	0	0	0	0	0	0
57000	0	0	0.75	0	0	0	0	0	0
57100	0	0	0.75	0	0	0	0	0	0
57200	0	0	0.75	0	0	0	0	0	0
57300	0	0	0.75	0	0	0	0	0	0
57400	0	0	0.75	0	0	0	0	0	0
57500	0	0	0.75	0	0	0	0	0	0
57600	0	0	0.75	0	0	0	0	0	0
57700	0	0	0.75	0	0	0	0	0	0
57800	0	0	0.75	0	0	0	0	0	0
57900	0	0	0.75	0	0	0	0	0	0
58000	0	0	0.75	0	0	0	0	0	0
58100	0	0	0.75	0	0	0	0	0	0
58200	0	0	0.75	0	0	0	0	0	0
58300	0	0	0	0	0	0	0	0	0
58400	0	0	0	0	0	0	0	0	0
58500	0	0	0	0	0	0	0	0	0
58600	0	0	0	0	0	0	0	0	0
58700	0	0	0	0	0	0	0	0	0
58800	0	0	0	0	0	0	0	0	0
58900	0	0	0	0	0	0	0	0	0
59000	0	0	0	0	0	0	0	0	0
59100	0	0	0	0	0	0	0	0	0
59200	0	0	0	0	0	0	0	0	0
59300	0	0	0	0	0	0	0	0	0
59400	0	0	0	0	0	0	0	0	0
59500	0	0	0	0	0	0	0	0	0
59600	0	0	0	0	0	0	0	0	0
59700	0	0	0	0	0	0	0	0	0
59800	0	0	0	0	0	0	0	0	0
59900	0	0	0	0	0	0	0	0	0
60000	0	0	0	0	0	0	0	0	0
60100	0	0	0	0	0	0	0	0	0
60200	0	0	0.75	0	0	0	0	0	0
60300	0	0	0.75	0	0	0	0	0	0
60400	0	0	0.75	0	0	0	0	0	0
60500	0	0	0.75	0	0	0	0	0	0
60600	0	0	0.75	0	0	0	0	0	0
60700	0	0	1	0	0	0	0	0	0
60800	0	0	1	0	0	0	0	0	0
60900	0	0	0.75	0	0	0	0	0	0
61000	0	0	1	0	0	0	0	0	0
61100	0	0	1	0	0	0	0	0	0
61200	0	0	1	0	0	0	0	0	0
61300	0	0	1	0	0	0	0	0	0
61400	0	0	1	0	0	0	0	0	0
61500	0	0	1	0	0	0	0	0	0
61600	0	0	1	0	0	0	0	0	0
61700	0	0	1	0	0	0	0	0	0
61800	0	0	1	0	0	0	0	0	0
61900	0	0	1	0	0	0	0	0	0
62000	0	0	0.75	0	0	0	0	0	0
62100	0	0	0.75	0	0	0	0	0	0
62200	0	0	0.75	0	0	0	0	0	0
62300	0	0	0.75	0	0	0	0	0	0
62400	0	0	0.75	0	0	0	0	0	0
62500	0	0	0.75	0	0	0	0	0	0
62600	0	0	0.75	0	0	0	0	0	0
62700	0	0	0.75	0	0	0	0	0	0
62800	0	0	0.75	0	0	0	0	0	0
62900	0	0	0.75	0	0	0	0	0	0
63000	0	0	0.75	0	0	0	0	0	0
63100	0	0	1	0	0	0	0	0	0
63200	0	0	0.75	0	0	0	0	0	0
63300	0	0	0.75	0	0	0	0	0	0
63400	0	0	0.75	0	0	0	0	0	0
63500	0	0	0.75	0	0	0	0	0	0
63600	0	0	0.75	0	0	0	0	0	0
63700	0	0	1	0	0	0	0	0	0
63800	0	0	1	0	0	0	0	0	0
63900	0	0	0.75	0	0	0	0	0	0
64000	0	0	1	0	0	0	0	0	0
64100	0	0	1	0	0	0	0	0	0
64200	0	0	1	0	0	0	0	0	0
64300	0	0	1	0	0	0	0	0	0
64400	0	0	1	0	0	0	0	0	0
64500	0	0	1	0	0	0	0	0	0
64600	0	0	1	0	0	0	0	0	0
64700	0	0	1	0	0	0	0	0	0
64800	0	0	1	0	0	0	0	0	0
64900	0	0	1	0	0	0	0	0	0
65000	0	0	1	0	0	0	0	0	0
65100	0	0	1	0	0	0	0	0	0
65200	0	0	1	0	0	0	0	0	0
65300	0	0.5	1	0	0	0	0	0	0
65400	0	0.5	1	0	0	0	0	0	0
65500	0	0.5	1	0	0	0	0	0	0
65600	0	0.5	1	0	0	0	0	0	0
65700	0	0.5	1	0	0	0	0	0	0
65800	0	0.5	1	0	0	0	0	0	0
65900	0	1	1	0	0	0	0	0	0
66000	0	1	1	0	0	0	0	0	0
66100	0	1	1	0	0	0	0	0	0
66200	0	0	1	0	0	0	0	0	0
66300	0	0	1	0	0	0	0	0	0
66400	0	0	1	0	0	0	0	0	0
66500	0	0	0.75	0	0	0	0	0	0
66600	0	0	0.75	0	0	0	0	0	0
66700	0	0	0.75	0	0	0	0	0	0
66800	0	0	0.75	0	0	0	0	0	0
66900	0	0	0.75	0	0	0	0	0	0
67000	0	0	0.75	0	0	0	0	0	0
67100	0	0	0.75	0	0	0	0	0	0
67200	0	0	0.75	0	0	0	0	0	0
67300	0	0	1	0	0	0	0	0	0
67400	0	0	0.75	0	0	0	0	0	0
67500	0	0	0.75	0	0	0	0	0	0
67600	0	0	0.75	0	0	0	0	0	0
67700	0	0	1	0	0	0	0	0	0
67800	0	0	0.75	0	0	0	0	0	0
67900	0	0.5	1	0	0	0	0	0	0
68000	0	0.5	1	0	0	0	0	0	0
68100	0	0.5	1	0	0	0	0	0	0
68200	0	0.5	1	0	0	0	0	0	0
68300	0	0.5	1	0	0	0	0	0	0
68400	0	1	1	0	0	0	0	0	0
68500	0	1	1	0	0	0	0	0	0
68600	0	0.5	1	0	0	0	0	0	0
68700	0	1	1	0	0	0	0	0	0
68800	0	1	1	0	0	0	0	0	0
68900	0	1	1	0	0	0	0	0	0
69000	0.25	1	1	0	0	0	0	0	0
69100	0	0.5	1	0	0	0	0	0	0
69200	0	0.5	1	0	0	0	0	0	0
69300	0	0.5	1	0	0	0	0	0	0
69400	0	0.5	1	0	0	0	0	0	0
69500	0	0.5	1	0	0	0	0	0	0
69600	0	0.5	1	0	0	0	0	0	0
69700	0	1	1	0	0	0	0	0	0
69800	0	0.5	1	0	0	0	0	0	0
69900	0	1	1	0	0	0	0	0	0
70000	0	1	1	0	0	0	0	0	0
70100	0	1	1	0	0	0	0	0	0
70200	0	1	1	0	0	0	0	0	0
70300	0.25	1	1	0	0	0	0	0	0
70400	0	1	1	0	0	0	0	0	0
70500	0.25	1	1	0	0	0	0	0	0
70600	0	1	1	0	0	0	0	0	0
70700	0	0.5	1	0	0	0	0	0	0
70800	0	0.5	1	0	0	0	0	0	0
70900	0	0.5	1	0	0	0	0	0	0
71000	0	0	1	0	0	0	0	0	0
71100	0	0	1	0	0	0	0	0	0
71200	0	0	1	0	0	0	0	0	0
71300	0	0	1	0	0	0	0	0	0
71400	0	0	1	0	0	0	0	0	0
71500	0	0	1	0	0	0	0	0	0
71600	0	0	1	0	0	0	0	0	0
71700	0	0.5	1	0	0	0	0	0	0
71800	0	0	1	0	0	0	0	0	0
71900	0	0	1	0	0	0	0	0	0
72000	0	0	1	0	0	0	0	0	0
72100	0	0	1	0	0	0	0	0	0
72200	0	0	1	0	0	0	0	0	0
72300	0	0	1	0	0	0	0	0	0
72400	0	0	1	0	0	0	0	0	0
72500	0	0.5	1	0	0	0	0	0	0
72600	0	0	1	0	0	0	0	0	0
72700	0	0	1	0	0	0	0	0	0
72800	0	0	1	0	0	0	0	0	0
72900	0	1	1	0	0	0	0	0	0
73000	0	1	1	0	0	0	0	0	0
73100	0	1	1	0	0	0	0	0	0
73200	0.25	1	1	0	0	0	0	0	0
73300	0	1	1	0	0	0	0	0	0
73400	0	1	1	0	0	0	0	0	0
73500	0	1	1	0	0	0	0	0	0
73600	0	1	1	0	0	0	0	0	0
73700	0	1	1	0	0	0	0	0	0
73800	0	1	1	0	0	0	0	0	0
73900	0	1	1	0	0	0	0	0	0
74000	0.25	1	1	0	0	0	0	0	0
74100	0	1	1	0	0	0	0	0	0
74200	0	1	1	0	0	0	0	0	0
74300	0	0.5	1	0	0	0	0	0	0
74400	0	1	1	0	0	0	0	0	0
74500	0	1	1	0	0	0	0	0	0
74600	0	1	1	0	0	0	0	0	0
74700	0	1	1	0	0	0	0	0	0
74800	0	1	1	0	0	0	0	0	0
74900	0	1	1	0	0	0	0	0	0
75000	0	1	1	0	0	0	0	0	0
75100	0.25	1	1	0	0	0	0	0	0
75200	0	1	1	0	0	0	0	0	0
75300	0	1	1	0	0	0	0	0	0
75400	0	1	1	0	0	0	0	0	0
75500	0	1	1	0	0	0	0	0	0
75600	0	0.5	1	0	0	0	0	0	0
75700	0	0.5	1	0	0	0	0	0	0
75800	0	1	1	0	0	0	0	0	0
75900	0	0.5	1	0	0	0	0	0	0
76000	0	1	1	0	0	0	0	0	0
76100	0	1	1	0	0	0	0	0	0
76200	0	1	1	0	0	0	0	0	0
76300	0.25	1	1	0	0	0	0	0	0
76400	0	1	1	0	0	0	0	0	0
76500	0.25	1	1	0	0	0	0	0	0
76600	0.25	1	1	0	0	0	0	0	0
76700	1	1	1	0	0	0	0	0	0
76800	0	1	1	0	0	0	0	0	0
76900	0.25	1	1	0	0	0	0	0	0
77000	0.25	1	1	0	0	0	0	0	0
77100	0	1	1	0	0	0	0	0	0
77200	0.25	1	1	0	0	0	0	0	0
77300	0	1	1	0	0	0	0	0	0
77400	0	1	1	0	0	0	0	0	0
77500	0	1	1	0	0	0	0	0	0
77600	0.25	1	1	0	0	0	0	0	0
77700	0.25	1	1	0	0	0	0	0	0
77800	0.25	1	1	0	0	0	0	0	0
77900	0.25	1	1	0	0	0	0	0	0
78000	0.25	1	1	0	0	0	0	0	0
78100	1	1	1	0	0	0	0	0	0
78200	0.25	1	1	0	0	0	0	0	0
78300	0.25	1	1	0	0	0	0	0	0
78400	1	1	1	0	0	0	0	0	0
78500	0.25	1	1	0	0	0	0	0	0
78600	0.25	1	1	0	0	0	0	0	0
78700	0.25	1	1	0	0	0	0	0	0
78800	1	1	1	0	0	0	0	0	0
78900	1	1	1	0	0	0	0	0	0
79000	1	1	1	0	0	0	0	0	0
79100	1	1	1	0	0	0	0	0	0
79200	1	1	1	0	0	0	0	0	0
79300	1	1	1	0	0	0	0	0	0
79400	1	1	1	0	0	0	0	0	0
79500	1	1	1	0	0	0	0	0	0
79600	1	1	1	0	0	0	0	0	0
79700	1	1	1	0	0	0	0	0	0
79800	0.25	1	1	0	0	0	0	0	0
79900	0.25	1	1	0	0	0	0	0	0
80000	0.25	1	1	0	0	0	0	0	0
80100	0.25	1	1	0	0	0	0	0	0
80200	0.25	1	1	0	0	0	0	0	0
80300	0.25	1	1	0	0	0	0	0	0
80400	0.25	1	1	0	0	0	0	0	0
80500	0.25	1	1	0	0	0	0	0	0
80600	0.25	1	1	0	0	0	0	0	0
80700	0.25	1	1	0	0	0	0	0	0
80800	0.25	1	1	0	0	0	0	0	0
80900	1	1	1	0	0	0	0	0	0
81000	0.25	1	1	0	0	0	0	0	0
81100	0.25	1	1	0	0	0	0	0	0
81200	0.25	1	1	0	0	0	0	0	0
81300	0.25	1	1	0	0	0	0	0	0
81400	0.25	1	1	0	0	0	0	0	0
81500	0.25	1	1	0	0	0	0	0	0
81600	0.25	1	1	0	0	0	0	0	0
81700	0.25	1	1	0	0	0	0	0	0
81800	1	1	1	0	0	0	0	0	0
81900	1	1	1	0	0	0	0	0	0
82000	1	1	1	0	0	0	0	0	0
82100	1	1	1	0	0	0	0	0	0
82200	1	1	1	0	0	0	0	0	0
82300	1	1	1	0	0	0	0	0	0
82400	1	1	1	0	0	0	0	0	0
82500	1	1	1	0	0	0	0	0	0
82600	1	1	1	0	0	0	0	0	0
82700	1	1	1	0	0	0	0	0	0
82800	1	1	1	0	0	0	0	0	0
82900	1	1	1	0	0	0	0	0	0
83000	1	1	1	0	0	0	0	0	0
83100	1	1	1	0	0	0	0	0	0
83200	1	1	1	0	0	0	0	0	0
83300	1	1	1	0	0	0	0	0	0
83400	0.25	1	1	0	0	0	0	0	0
83500	0.25	1	1	0	0	0	0	0	0
83600	0.25	1	1	0	0	0	0	0	0
83700	0.25	1	1	0	0	0	0	0	0
83800	0.25	1	1	0	0	0	0	0	0
83900	0.25	1	1	0	0	0	0	0	0
84000	0.25	1	1	0	0	0	0	0	0
84100	0.25	1	1	0	0	0	0	0	0
84200	0.25	1	1	0	0	0	0	0	0
84300	0.25	1	1	0	0	0	0	0	0
84400	0.25	1	1	0	0	0	0	0	0
84500	0.25	1	1	0	0	0	0	0	0
84600	0.25	1	1	0	0	0	0	0	0
84700	0.25	1	1	0	0	0	0	0	0
84800	0.25	1	1	0	0	0	0	0	0
84900	0.25	1	1	0	0	0	0	0	0
85000	0.25	1	1	0	0	0	0	0	0
85100	0.25	1	1	0	0	0	0	0	0
85200	0.25	1	1	0	0	0	0	0	0
85300	1	1	1	0	0	0	0	0	0
85400	1	1	1	0	0	0	0	0	0
85500	1	1	1	0	0	0	0	0	0
85600	1	1	1	0	0	0	0	0	0
85700	1	1	1	0	0	0	0	0	0
85800	1	1	1	0	0	0	0	0	0
85900	1	1	1	0	0	0	0	0	0
86000	1	1	1	0	0	0	0	0	0
86100	1	1	1	0	0	0	0	0	0
86200	1	1	1	0	0	0	0	0	0
86300	1	1	1	0	0	0	0	0	0
86400	1	1	1	0	0	0	0	0	0
86500	1	1	1	0	0	0	0	0	0
86600	1	1	1	0	0	0	0	0	0
86700	1	1	1	0	0	0	0	0	0
86800	1	1	1	0	0	0	0	0	0
86900	1	1	1	0	0	0	0	0	0
87000	1	1	1	0	0	0	0	0	0
87100	1	1	1	0	0	0	0	0	0
87200	1	1	1	0	0	0	0	0	0
87300	1	1	1	0	0	0	0	0	0
87400	1	1	1	0	0	0	0	0	0
87500	1	1	1	0	0	0	0	0	0
87600	1	1	1	0	0	0	0	0	0
87700	0.25	1	1	0	0	0	0	0	0
87800	0.25	1	1	0	0	0	0	0	0
87900	0.25	1	1	0	0	0	0	0	0
88000	0.25	1	1	0	0	0	0	0	0
88100	0.25	1	1	0	0	0	0	0	0
88200	0.25	1	1	0	0	0	0	0	0
88300	0.25	1	1	0	0	0	0	0	0
88400	0.25	1	1	0	0	0	0	0	0
88500	0.25	1	1	0	0	0	0	0	0
88600	0.25	1	1	0	0	0	0	0	0
88700	0.25	1	1	0	0	0	0	0	0
88800	0.25	1	1	0	0	0	0	0	0
88900	0.25	1	1	0	0	0	0	0	0
89000	0.25	1	1	0	0	0	0	0	0
89100	0.25	1	1	0	0	0	0	0	0
89200	1	1	1	0	0	0	0	0	0
89300	1	1	1	0	0	0	0	0	0
89400	0.25	1	1	0	0	0	0	0	0
89500	1	1	1	0	0	0	0	0	0
89600	0.25	1	1	0	0	0	0	0	0
89700	1	1	1	0	0	0	0	0	0
89800	1	1	1	0	0	0	0	0	0
89900	1	1	1	0	0	0	0	0	0
90000	1	1	1	0	0	0	0	0	0
90100	1	1	1	0	0	0	0	0	0
90200	1	1	1	0	0	0	0	0	0
90300	1	1	1	0	0	0	0	0	0
90400	1	1	1	0	0	0	0	0	0
90500	1	1	1	0	0	0	0	0	0
90600	1	1	1	0	0	0	0	0	0
90700	1	1	1	0	0	0	0	0	0
90800	1	1	1	0	0	0	0	0	0
90900	1	1	1	0	0	0	0	0	0
91000	1	1	1	0	0	0	0	0	0
91100	1	1	1	0	0	0	0	0	0
91200	1	1	1	0	0	0	0	0	0
91300	1	1	1	0	0	0	0	0	0
91400	1	1	1	0	0	0	0	0	0
91500	1	1	1	0	0	0	0	0	0
91600	1	1	1	0	0	0	0	0	0
91700	1	1	1	0	0	0	0	0	0
91800	1	1	1	0	0	0	0	0	0
91900	1	1	1	0	0	0	0	0	0
92000	1	1	1	0	0	0	0	0	0
92100	1	1	1	0	0	0	0	0	0
92200	1	1	1	0	0	0	0	0	0
92300	1	1	1	0	0	0	0	0	0
92400	1	1	1	0	0	0	0	0	0
92500	1	1	1	0	0	0	0	0	0
92600	1	1	1	0	0	0	0	0	0
92700	1	1	1	0	0	0	0	0	0
92800	1	1	1	0	0	0	0	0	0
92900	1	1	1	0	0	0	0	0	0
93000	1	1	1	0	0	0	0	0	0
93100	1	1	1	0	0	0	0	0	0
93200	1	1	1	0	0	0	0	0	0
93300	1	1	1	0	0	0	0	0	0
93400	1	1	1	0	0	0	0	0	0
93500	1	1	1	0	0	0	0	0	0
93600	1	1	1	0	0	0	0	0	0
93700	1	1	1	0	0	0	0	0	0
93800	1	1	1	0	0	0	0	0	0
93900	1	1	1	0	0	0	0	0	0
94000	1	1	1	0	0	0	0	0	0
94100	1	1	1	0	0	0	0	0	0
94200	1	1	1	0	0	0	0	0	0
94300	1	1	1	0	0	0	0	0	0
94400	1	1	1	0	0	0	0	0	0
94500	1	1	1	0	0	0	0	0	0
94600	1	1	1	0	0	0	0	0	0
94700	1	1	1	0	0	0	0	0	0
94800	1	1	1	0	0	0	0	0	0
94900	1	1	1	0	0	0	0	0	0
95000	1	1	1	0	0	0	0	0	0
95100	1	1	1	0	0	0	0	0	0
95200	1	1	1	0	0	0	0	0	0
95300	1	1	1	0	0	0	0	0	0
95400	1	1	1	0	0	0	0	0	0
95500	1	1	1	0	0	0	0	0	0
95600	1	1	1	0	0	0	0	0	0
95700	1	1	1	0	0	0	0	0	0
95800	1	1	1	0	0	0	0	0	0
95900	1	1	1	0	0	0	0	0	0
96000	1	1	1	0	0	0	0	0	0
96100	1	1	1	0	0	0	0	0	0
96200	1	1	1	0	0	0	0	0	0
96300	1	1	1	0	0	0	0	0	0
96400	1	1	1	0	0	0	0	0	0
96500	1	1	1	0	0	0	0	0	0
96600	1	1	1	0	0	0	0	0	0
96700	1	1	1	0	0	0	0	0	0
96800	1	1	1	0	0	0	0	0	0
96900	1	1	1	0	0	0	0	0	0
97000	1	1	1	0	0	0	0	0	0
97100	1	1	1	0	0	0	0	0	0
97200	1	1	1	0	0	0	0	0	0
97300	1	1	1	0	0	0	0	0	0
97400	1	1	1	0	0	0	0	0	0
97500	1	1	1	0	0	0	0	0	0
97600	1	1	1	0	0	0	0	0	0
97700	1	1	1	0	0	0	0	0	0
97800	1	1	1	0	0	0	0	0	0
97900	1	1	1	0	0	0	0	0	0
98000	1	1	1	0	0	0	0	0	0
98100	1	1	1	0	0	0	0	0	0
98200	1	1	1	0	0	0	0	0	0
98300	1	1	1	0	0	0	0	0	0
98400	1	1	1	0	0	0	0	0	0
98500	1	1	1	0	0	0	0	0	0
98600	1	1	1	0	0	0	0	0	0
98700	1	1	1	0	0	0	0	0	0
98800	1	1	1	0	0	0	0	0	0
98900	1	1	1	0	0	0	0	0	0
99000	1	1	1	0	0	0	0	0	0
99100	1	1	1	0	0	0	0	0	0
99200	1	1	1	0	0	0	0	0	0
99300	1	1	1	0	0	0	0	0	0
99400	1	1	1	0	0	0	0	0	0
99500	1	1	1	0	0	0	0	0	0
99600	1	1	1	0	0	0	0	0	0
99700	1	1	1	0	0	0	0	0	0
99800	1	1	1	0	0	0	0	0	0
99900	1	1	1	0	0	0	0	0	0
100000	1	1	1	0	0	0	0	0	0
100100	1	1	1	0	0	0	0	0	0
100200	1	1	1	0	0	0	0	0	0
100300	1	1	1	0	0	0	0	0	0
100400	1	1	1	0	0	0	0	0	0
100500	1	1	1	0	0	0	0	0	0
100600	1	1	1	0	0	0	0	0	0
100700	1	1	1	0	0	0	0	0	0
100800	1	1	1	0	0	0	0	0	0
100900	1	1	1	0	0	0	0	0	0
101000	1	1	1	0	0	0	0	0	0
101100	1	1	1	0	0	0	0	0	0
101200	1	1	1	0	0	0	0	0	0
101300	1	1	1	0	0	0	0	0	0
101400	1	1	1	0	0	0	0	0	0
101500	1	1	1	0	0	0	0	0	0
101600	1	1	1	0	0	0	0	0	0
101700	1	1	1	0	0	0	0	0	0
101800	1	1	1	0	0	0	0	0	0
101900	1	1	1	0	0	0	0	0	0
102000	1	1	1	0	0	0	0	0	0
102100	1	1	1	0	0	0	0	0	0
102200	1	1	1	0	0	0	0	0	0
102300	1	1	1	0	0	0	0	0	0
102400	1	1	1	0	0	0	0	0	0
102500	1	1	1	0	0	0	0	0	0
102600	1	1	1	0	0	0	0	0	0
102700	1	1	1	0	0	0	0	0	0
102800	1	1	1	0	0	0	0	0	0
102900	1	1	1	0	0	0	0	0	0
103000	1	1	1	0	0	0	0	0	0
103100	1	1	1	0	0	0	0	0	0
103200	1	1	1	0	0	0	0	0	0
103300	1	1	1	0	0	0	0	0	0
103400	1	1	1	0	0	0	0	0	0
103500	1	1	1	0	0	0	0	0	0
103600	1	1	1	0	0	0	0	0	0
103700	1	1	1	0	0	0	0	0	0
103800	1	1	1	0	0	0	0	0	0
103900	1	1	1	0	0	0	0	0	0
104000	1	1	1	0	0	0	0	0	0
104100	1	1	1	0	0	0	0	0	0
104200	1	1	1	0	0	0	0	0	0
104300	1	1	1	0	0	0	0	0	0
104400	1	1	1	0	0	0	0	0	0
104500	1	1	1	0	0	0	0	0	0
104600	1	1	1	0	0	0	0	0	0
104700	1	1	1	0	0	0	0	0	0
104800	1	1	1	0	0	0	0	0	0
104900	1	1	1	0	0	0	0	0	0
105000	1	1	1	0	0	0	0	0	0
105100	1	1	1	0	0	0	0	0	0
105200	1	1	1	0	0	0	0	0	0
105300	1	1	1	0	0	0	0	0	0
105400	1	1	1	0	0	0	0	0	0
105500	1	1	1	0	0	0	0	0	0
105600	1	1	1	0	0	0	0	0	0
105700	1	1	1	0	0	0	0	0	0
105800	1	1	1	0	0	0	0	0	0
105900	1	1	1	0	0	0	0	0	0
106000	1	1	1	0	0	0	0	0	0
106100	1	1	1	0	0	0	0	0	0
106200	1	1	1	0	0	0	0	0	0
106300	1	1	1	0	0	0	0	0	0
106400	1	1	1	0	0	0	0	0	0
106500	1	1	1	0	0	0	0	0	0
106600	1	1	1	0	0	0	0	0	0
106700	1	1	1	0	0	0	0	0	0
106800	1	1	1	0	0	0	0	0	0
106900	1	1	1	0	0	0	0	0	0
107000	1	1	1	0	0	0	0	0	0
107100	1	1	1	0	0	0	0	0	0
107200	1	1	1	0	0	0	0	0	0
107300	1	1	1	0	0	0	0	0	0
107400	1	1	1	0	0	0	0	0	0
107500	1	1	1	0	0	0	0	0	0
107600	1	1	1	0	0	0	0	0	0
107700	1	1	1	0	0	0	0	0	0
107800	1	1	1	0	0	0	0	0	0
107900	1	1	1	0	0	0	0	0	0
108000	1	1	1	0	0	0	0	0	0
108100	1	1	1	0	0	0	0	0	0
108200	1	1	1	0	0	0	0	0	0
108300	1	1	1	0	0	0	0	0	0
108400	1	1	1	0	0	0	0	0	0
108500	1	1	1	0	0	0	0	0	0
108600	1	1	1	0	0	0	0	0	0
108700	1	1	1	0	0	0	0	0	0
108800	1	1	1	0	0	0	0	0	0
108900	1	1	1	0	0	0	0	0	0
109000	1	1	1	0	0	0	0	0	0
109100	1	1	1	0	0	0	0	0	0
109200	1	1	1	0	0	0	0	0	0
109300	1	1	1	0	0	0	0	0	0
109400	1	1	1	0	0	0	0	0	0
109500	1	1	1	0	0	0	0	0	0
109600	1	1	1	0	0	0	0	0	0
109700	1	1	1	0	0	0	0	0	0
109800	1	1	1	0	0	0	0	0	0
109900	1	1	1	0	0	0	0	0	0
110000	1	1	1	0	0	0	0	0	0
110100	1	1	1	0	0	0	0	0	0
110200	1	1	1	0	0	0	0	0	0
110300	1	1	1	0	0	0	0	0	0
110400	1	1	1	0	0	0	0	0	0
110500	1	1	1	0	0	0	0	0	0
110600	1	1	1	0	0	0	0	0	0
110700	1	1	1	0	0	0	0	0	0
110800	1	1	1	0	0	0	0	0	0
110900	1	1	1	0	0	0	0	0	0
111000	1	1	1	0	0	0	0	0	0
111100	1	1	1	0	0	0	0	0	0
111200	1	1	1	0	0	0	0	0	0
111300	1	1	1	0	0	0	0	0	0
111400	1	1	1	0	0	0	0	0	0
111500	1	1	1	0	0	0	0	0	0
111600	1	1	1	0	0	0	0	0	0
111700	1	1	1	0	0	0	0	0	0
111800	1	1	1	0	0	0	0	0	0
111900	1	1	1	0	0	0	0	0	0
112000	1	1	1	0	0	0	0	0	0
112100	1	1	1	0	0	0	0	0	0
112200	1	1	1	0	0	0	0	0	0
112300	1	1	1	0	0	0	0	0	0
112400	1	1	1	0	0	0	0	0	0
112500	1	1	1	0	0	0	0	0	0
112600	1	1	1	0	0	0	0	0	0
112700	1	1	1	0	0	0	0	0	0
112800	1	1	1	0	0	0	0	0	0
112900	1	1	1	0	0	0	0	0	0
113000	1	1	1	0	0	0	0	0	0
113100	1	1	1	0	0	0	0	0	0
113200	1	1	1	0	0	0	0	0	0
113300	1	1	1	0	0	0	0	0	0
113400	1	1	1	0	0	0	0	0	0
113500	1	1	1	0	0	0	0	0	0
113600	1	1	1	0	0	0	0	0	0
113700	1	1	1	0	0	0	0	0	0
113800	1	1	1	0	0	0	0	0	0
113900	1	1	1	0	0	0	0	0	0
114000	1	1	1	0	0	0	0	0	0
114100	1	1	1	0	0	0	0	0	0
114200	1	1	1	0	0	0	0	0	0
114300	1	1	1	0	0	0	0	0	0
114400	1	1	1	0	0	0	0	0	0
114500	1	1	1	0	0	0	0	0	0
114600	1	1	1	0	0	0	0	0	0
114700	1	1	1	0	0	0	0	0	0
114800	1	1	1	0	0	0	0	0	0
114900	1	1	1	0	0	0	0	0	0
115000	1	1	1	0	0	0	0	0	0
115100	1	1	1	0	0	0	0	0	0
115200	1	1	1	0	0	0	0	0	0
115300	1	1	1	0	0	0	0	0	0
115400	1	1	1	0	0	0	0	0	0
115500	1	1	1	0	0	0	0	0	0
115600	1	1	1	0	0	0	0	0	0
115700	1	1	1	0	0	0	0	0	0
115800	1	1	1	0	0	0	0	0	0
115900	1	1	1	0	0	0	0	0	0
116000	1	1	1	0	0	0	0	0	0
116100	1	1	1	0	0	0	0	0	0
116200	1	1	1	0	0	0	0	0	0
116300	1	1	1	0	0	0	0	0	0
116400	1	1	1	0	0	0	0	0	0
116500	1	1	1	0	0	0	0	0	0
116600	1	1	1	0	0	0	0	0	0
116700	1	1	1	0	0	0	0	0	0
116800	1	1	1	0	0	0	0	0	0
116900	1	1	1	0	0	0	0	0	0
117000	1	1	1	0	0	0	0	0	0
117100	1	1	1	0	0	0	0	0	0
117200	1	1	1	0	0	0	0	0	0
117300	1	1	1	0	0	0	0	0	0
117400	1	1	1	0	0	0	0	0	0
117500	1	1	1	0	0	0	0	0	0
117600	1	1	1	0	0	0	0	0	0
117700	1	1	1	0	0	0	0	0	0
117800	1	1	1	0	0	0	0	0	0
117900	1	1	1	0	0	0	0	0	0
118000	1	1	1	0	0	0	0	0	0
118100	1	1	1	0	0	0	0	0	0
118200	1	1	1	0	0	0	0	0	0
118300	1	1	1	0	0	0	0	0	0
118400	1	1	1	0	0	0	0	0	0
118500	1	1	1	0	0	0	0	0	0
118600	1	1	1	0	0	0	0	0	0
118700	1	1	1	0	0	0	0	0	0
118800	1	1	1	0	0	0	0	0	0
118900	1	1	1	0	0	0	0	0	0
119000	1	1	1	0	0	0	0	0	0
119100	1	1	1	0	0	0	0	0	0
119200	1	1	1	0	0	0	0	0	0
119300	1	1	1	0	0	0	0	0	0
119400	1	1	1	0	0	0	0	0	0
119500	1	1	1	0	0	0	0	0	0
119600	1	1	1	0	0	0	0	0	0
119700	1	1	1	0	0	0	0	0	0
119800	1	1	1	0	0	0	0	0	0
119900	1	1	1	0	0	0	0	0	0
120000	1	1	1	0	0	0	0	0	0
120100	1	1	1	0	0	0	0	0	0
120200	1	1	1	0	0	0	0	0	0
120300	1	1	1	0	0	0	0	0	0
120400	1	1	1	0	0	0	0	0	0
120500	1	1	1	0	0	0	0	0	0
120600	1	1	1	0	0	0	0	0	0
120700	1	1	1	0	0	0	0	0	0
120800	1	1	1	0	0	0	0	0	0
120900	1	1	1	0	0	0	0	0	0
121000	1	1	1	0	0	0	0	0	0
121100	1	1	1	0	0	0	0	0	0
121200	1	1	1	0	0	0	0	0	0
121300	1	1	1	0	0	0	0	0	0
121400	1	1	1	0	0	0	0	0	0
121500	1	1	1	0	0	0	0	0	0
121600	1	1	1	0	0	0	0	0	0
121700	1	1	1	0	0	0	0	0	0
121800	1	1	1	0	0	0	0	0	0
121900	1	1	1	0	0	0	0	0	0
122000	1	1	1	0	0	0	0	0	0
122100	1	1	1	0	0	0	0	0	0
122200	1	1	1	0	0	0	0	0	0
122300	1	1	1	0	0	0	0	0	0
122400	1	1	1	0	0	0	0	0	0
122500	1	1	1	0	0	0	0	0	0
122600	1	1	1	0	0	0	0	0	0
122700	1	1	1	0	0	0	0	0	0
122800	1	1	1	0	0	0	0	0	0
122900	1	1	1	0	0	0	0	0	0
123000	1	1	1	0	0	0	0	0	0
123100	1	1	1	0	0	0	0	0	0
123200	1	1	1	0	0	0	0	0	0
123300	1	1	1	0	0	0	0	0	0
123400	1	1	1	0	0	0	0	0	0
123500	1	1	1	0	0	0	0	0	0
123600	1	1	1	0	0	0	0	0	0
123700	1	1	1	0	0	0	0	0	0
123800	1	1	1	0	0	0	0	0	0
123900	1	1	1	0	0	0	0	0	0
124000	1	1	1	0	0	0	0	0	0
124100	1	1	1	0	0	0	0	0	0
124200	1	1	1	0	0	0	0	0	0
124300	1	1	1	0	0	0	0	0	0
124400	1	1	1	0	0	0	0	0	0
124500	1	1	1	0	0	0	0	0	0
124600	1	1	1	0	0	0	0	0	0
124700	1	1	1	0	0	0	0	0	0
124800	1	1	1	0	0	0	0	0	0
124900	1	1	1	0	0	0	0	0	0
125000	1	1	1	0	0	0	0	0	0
125100	1	1	1	0	0	0	0	0	0
125200	1	1	1	0	0	0	0	0	0
125300	1	1	1	0	0	0	0	0	0
125400	1	1	1	0	0	0	0	0	0
125500	1	1	1	0	0	0	0	0	0
125600	1	1	1	0	0	0	0	0	0
125700	1	1	1	0	0	0	0	0	0
125800	1	1	1	0	0	0	0	0	0
125900	1	1	1	0	0	0	0	0	0
126000	1	1	1	0	0	0	0	0	0
126100	1	1	1	0	0	0	0	0	0
126200	1	1	1	0	0	0	0	0	0
126300	1	1	1	0	0	0	0	0	0
126400	1	1	1	0	0	0	0	0	0
126500	1	1	1	0	0	0	0	0	0
126600	1	1	1	0	0	0	0	0	0
126700	1	1	1	0	0	0	0	0	0
126800	1	1	1	0	0	0	0	0	0
126900	1	1	1	0	0	0	0	0	0
127000	1	1	1	0	0	0	0	0	0
127100	1	1	1	0	0	0	0	0	0
127200	1	1	1	0	0	0	0	0	0
127300	1	1	1	0	0	0	0	0	0
127400	1	1	1	0	0	0	0	0	0
127500	1	1	1	0	0	0	0	0	0
127600	1	1	1	0	0	0	0	0	0
127700	1	1	1	0	0	0	0	0	0
127800	1	1	1	0	0	0	0	0	0
127900	1	1	1	0	0	0	0	0	0
128000	1	1	1	0	0	0	0	0	0
128100	1	1	1	0	0	0	0	0	0
128200	1	1	1	0	0	0	0	0	0
128300	1	1	1	0	0	0	0	0	0
128400	1	1	1	0	0	0	0	0	0
128500	1	1	1	0	0	0	0	0	0
128600	1	1	1	0	0	0	0	0	0
128700	1	1	1	0	0	0	0	0	0
128800	1	1	1	0	0	0	0	0	0
128900	1	1	1	0	0	0	0	0	0
129000	1	1	1	0	0	0	0	0	0
129100	1	1	1	0	0	0	0	0	0
129200	1	1	1	0	0	0	0	0	0
129300	1	1	1	0	0	0	0	0	0
129400	1	1	1	0	0	0	0	0	0
129500	1	1	1	0	0	0	0	0	0
129600	1	1	1	0	0	0	0	0	0
129700	1	1	1	0	0	0	0	0	0
129800	1	1	1	0	0	0	0	0	0
129900	1	1	1	0	0	0	0	0	0
130000	1	1	1	0	0	0	0	0	0
130100	1	1	1	0	0	0	0	0	0
130200	1	1	1	0	0	0	0	0	0
130300	1	1	1	0	0	0	0	0	0
130400	1	1	1	0	0	0	0	0	0
130500	1	1	1	0	0	0	0	0	0
130600	1	1	1	0	0	0	0	0	0
130700	1	1	1	0	0	0	0	0	0
130800	1	1	1	0	0	0	0	0	0
130900	1	1	1	0	0	0	0	0	0
131000	1	1	1	0	0	0	0	0	0
131100	1	1	1	0	0	0	0	0	0
131200	1	1	1	0	0	0	0	0	0
131300	1	1	1	0	0	0	0	0	0
131400	1	1	1	0	0	0	0	0	0
131500	1	1	1	0	0	0	0	0	0
131600	1	1	1	0	0	0	0	0	0
131700	1	1	1	0	0	0	0	0	0
131800	1	1	1	0	0	0	0	0	0
131900	1	1	1	0	0	0	0	0	0
132000	1	1	1	0	0	0	0	0	0
132100	1	1	1	0	0	0	0	0	0
132200	1	1	1	0	0	0	0	0	0
132300	1	1	1	0	0	0	0	0	0
132400	1	1	1	0	0	0	0	0	0
132500	1	1	1	0	0	0	0	0	0
132600	1	1	1	0	0	0	0	0	0
132700	1	1	1	0	0	0	0	0	0
132800	1	1	1	0	0	0	0	0	0
132900	1	1	1	0	0	0	0	0	0
133000	1	1	1	0	0	0	0	0	0
133100	1	1	1	0	0	0	0	0	0
133200	1	1	1	0	0	0	0	0	0
133300	1	1	1	0	0	0	0	0	0
133400	1	1	1	0	0	0	0	0	0
133500	1	1	1	0	0	0	0	0	0
133600	1	1	1	0	0	0	0	0	0
133700	1	1	1	0	0	0	0	0	0
133800	1	1	1	0	0	0	0	0	0
133900	1	1	1	0	0	0	0	0	0
134000	1	1	1	0	0	0	0	0	0
134100	1	1	1	0	0	0	0	0	0
134200	1	1	1	0	0	0	0	0	0
134300	1	1	1	0	0	0	0	0	0
134400	1	1	1	0	0	0	0	0	0
134500	1	1	1	0	0	0	0	0	0
134600	1	1	1	0	0	0	0	0	0
134700	1	1	1	0	0	0	0	0	0
134800	1	1	1	0	0	0	0	0	0
134900	1	1	1	0	0	0	0	0	0
135000	1	1	1	0	0	0	0	0	0
135100	1	1	1	0	0	0	0	0	0
135200	1	1	1	0	0	0	0	0	0
135300	1	1	1	0	0	0	0	0	0
135400	1	1	1	0	0	0	0	0	0
135500	1	1	1	0	0	0	0	0	0
135600	1	1	1	0	0	0	0	0	0
135700	1	1	1	0	0	0	0	0	0
135800	1	1	1	0	0	0	0	0	0
135900	1	1	1	0	0	0	0	0	0
136000	1	1	1	0	0	0	0	0	0
136100	1	1	1	0	0	0	0	0	0
136200	1	1	1	0	0	0	0	0	0
136300	1	1	1	0	0	0	0	0	0
136400	1	1	1	0	0	0	0	0	0
136500	1	1	1	0	0	0	0	0	0
136600	1	1	1	0	0	0	0	0	0
136700	1	1	1	0	0	0	0	0	0
136800	1	1	1	0	0	0	0	0	0
136900	1	1	1	0	0	0	0	0	0
137000	1	1	1	0	0	0	0	0	0
137100	1	1	1	0	0	0	0	0	0
137200	1	1	1	0	0	0	0	0	0
137300	1	1	1	0	0	0	0	0	0
137400	1	1	1	0	0	0	0	0	0
137500	1	1	1	0	0	0	0	0	0
137600	1	1	1	0	0	0	0	0	0
137700	1	1	1	0	0	0	0	0	0
137800	1	1	1	0	0	0	0	0	0
137900	1	1	1	0	0	0	0	0	0
138000	1	1	1	0	0	0	0	0	0
138100	1	1	1	0	0	0	0	0	0
138200	1	1	1	0	0	0	0	0	0
138300	1	1	1	0	0	0	0	0	0
138400	1	1	1	0	0	0	0	0	0
138500	1	1	1	0	0	0	0	0	0
138600	1	1	1	0	0	0	0	0	0
138700	1	1	1	0	0	0	0	0	0
138800	1	1	1	0	0	0	0	0	0
138900	1	1	1	0	0	0	0	0	0
139000	1	1	1	0	0	0	0	0	0
139100	1	1	1	0	0	0	0	0	0
139200	1	1	1	0	0	0	0	0	0
139300	1	1	1	0	0	0	0	0	0
139400	1	1	1	0	0	0	0	0	0
139500	1	1	1	0	0	0	0	0	0
139600	1	1	1	0	0	0	0	0	0
139700	1	1	1	0	0	0	0	0	0
139800	1	1	1	0	0	0	0	0	0
139900	1	1	1	0	0	0	0	0	0
140000	1	1	1	0	0	0	0	0	0
140100	1	1	1	0	0	0	0	0	0
140200	1	1	1	0	0	0	0	0	0
140300	1	1	1	0	0	0	0	0	0
140400	1	1	1	0	0	0	0	0	0
140500	1	1	1	0	0	0	0	0	0
140600	1	1	1	0	0	0	0	0	0
140700	1	1	1	0	0	0	0	0	0
140800	1	1	1	0	0	0	0	0	0
140900	1	1	1	0	0	0	0	0	0
141000	1	1	1	0	0	0	0	0	0
141100	1	1	1	0	0	0	0	0	0
141200	1	1	1	0	0	0	0	0	0
141300	1	1	1	0	0	0	0	0	0
141400	1	1	1	0	0	0	0	0	0
141500	1	1	1	0	0	0	0	0	0
141600	1	1	1	0	0	0	0	0	0
141700	1	1	1	0	0	0	0	0	0
141800	1	1	1	0	0	0	0	0	0
141900	1	1	1	0	0	0	0	0	0
142000	1	1	1	0	0	0	0	0	0
142100	1	1	1	0	0	0	0	0	0
142200	1	1	1	0	0	0	0	0	0
142300	1	1	1	0	0	0	0	0	0
142400	1	1	1	0	0	0	0	0	0
142500	1	1	1	0	0	0	0	0	0
142600	1	1	1	0	0	0	0	0	0
142700	1	1	1	0	0	0	0	0	0
142800	1	1	1	0	0	0	0	0	0
142900	1	1	1	0	0	0	0	0	0
143000	1	1	1	0	0	0	0	0	0
143100	1	1	1	0	0	0	0	0	0
143200	1	1	1	0	0	0	0	0	0
143300	1	1	1	0	0	0	0	0	0
143400	1	1	1	0	0	0	0	0	0
143500	1	1	1	0	0	0	0	0	0
143600	1	1	1	0	0	0	0	0	0
143700	1	1	1	0	0	0	0	0	0
143800	1	1	1	0	0	0	0	0	0
143900	1	1	1	0	0	0	0	0	0
144000	1	1	1	0	0	0	0	0	0
144100	1	1	1	0	0	0	0	0	0
144200	1	1	1	0	0	0	0	0	0
144300	1	1	1	0	0	0	0	0	0
144400	1	1	1	0	0	0	0	0	0
144500	1	1	1	0	0	0	0	0	0
144600	1	1	1	0	0	0	0	0	0
144700	1	1	1	0	0	0	0	0	0
144800	1	1	1	0	0	0	0	0	0
144900	1	1	1	0	0	0	0	0	0
145000	1	1	1	0	0	0	0	0	0
145100	1	1	1	0	0	0	0	0	0
145200	1	1	1	0	0	0	0	0	0
145300	1	1	1	0	0	0	0	0	0
145400	1	1	1	0	0	0	0	0	0
145500	1	1	1	0	0	0	0	0	0
145600	1	1	1	0	0	0	0	0	0
145700	1	1	1	0	0	0	0	0	0
145800	1	1	1	0	0	0	0	0	0
145900	1	1	1	0	0	0	0	0	0
146000	1	1	1	0	0	0	0	0	0
146100	1	1	1	0	0	0	0	0	0
146200	1	1	1	0	0	0	0	0	0
146300	1	1	1	0	0	0	0	0	0
146400	1	1	1	0	0	0	0	0	0
146500	1	1	1	0	0	0	0	0	0
146600	1	1	1	0	0	0	0	0	0
146700	1	1	1	0	0	0	0	0	0
146800	1	1	1	0	0	0	0	0	0
146900	1	1	1	0	0	0	0	0	0
147000	1	1	1	0	0	0	0	0	0
147100	1	1	1	0	0	0	0	0	0
147200	1	1	1	0	0	0	0	0	0
147300	1	1	1	0	0	0	0	0	0
147400	1	1	1	0	0	0	0	0	0
147500	1	1	1	0	0	0	0	0	0
147600	1	1	1	0	0	0	0	0	0
147700	1	1	1	0	0	0	0	0	0
147800	1	1	1	0	0	0	0	0	0
147900	1	1	1	0	0	0	0	0	0
148000	1	1	1	0	0	0	0	0	0
148100	1	1	1	0	0	0	0	0	0
148200	1	1	1	0	0	0	0	0	0
148300	1	1	1	0	0	0	0	0	0
148400	1	1	1	0	0	0	0	0	0
148500	1	1	1	0	0	0	0	0	0
148600	1	1	1	0	0	0	0	0	0
148700	1	1	1	0	0	0	0	0	0
148800	1	1	1	0	0	0	0	0	0
148900	1	1	1	0	0	0	0	0	0
149000	1	1	1	0	0	0	0	0	0
149100	1	1	1	0	0	0	0	0	0
149200	1	1	1	0	0	0	0	0	0
149300	1	1	1	0	0	0	0	0	0
149400	1	1	1	0	0	0	0	0	0
149500	1	1	1	0	0	0	0	0	0
149600	1	1	1	0	0	0	0	0	0
149700	1	1	1	0	0	0	0	0	0
149800	1	1	1	0	0	0	0	0	0
149900	1	1	1	0	0	0	0	0	0
150000	1	1	1	0	0	0	0	0	0
150100	1	1	1	0	0	0	0	0	0
150200	1	1	1	0	0	0	0	0	0
150300	1	1	1	0	0	0	0	0	0
150400	1	1	1	0	0	0	0	0	0
150500	1	1	1	0	0	0	0	0	0
150600	1	1	1	0	0	0	0	0	0
150700	1	1	1	0	0	0	0	0	0
150800	1	1	1	0	0	0	0	0	0
150900	1	1	1	0	0	0	0	0	0
151000	1	1	1	0	0	0	0	0	0
151100	1	1	1	0	0	0	0	0	0
151200	1	1	1	0	0	0	0	0	0
151300	1	1	1	0	0	0	0	0	0
151400	1	1	1	0	0	0	0	0	0
151500	1	1	1	0	0	0	0	0	0
151600	1	1	1	0	0	0	0	0	0
151700	1	1	1	0	0	0	0	0	0
151800	1	1	1	0	0	0	0	0	0
151900	1	1	1	0	0	0	0	0	0
152000	1	1	1	0	0	0	0	0	0
152100	1	1	1	0	0	0	0	0	0
152200	1	1	1	0	0	0	0	0	0
152300	1	1	1	0	0	0	0	0	0
152400	1	1	1	0	0	0	0	0	0
152500	1	1	1	0	0	0	0	0	0
152600	1	1	1	0	0	0	0	0	0
152700	1	1	1	0	0	0	0	0	0
152800	1	1	1	0	0	0	0	0	0
152900	1	1	1	0	0	0	0	0	0
153000	1	1	1	0	0	0	0	0	0
153100	1	1	1	0	0	0	0	0	0
153200	1	1	1	0	0	0	0	0	0
153300	1	1	1	0	0	0	0	0	0
153400	1	1	1	0	0	0	0	0	0
153500	1	1	1	0	0	0	0	0	0
153600	1	1	1	0	0	0	0	0	0
153700	1	1	1	0	0	0	0	0	0
153800	1	1	1	0	0	0	0	0	0
153900	1	1	1	0	0	0	0	0	0
154000	1	1	1	0	0	0	0	0	0
154100	1	1	1	0	0	0	0	0	0
154200	1	1	1	0	0	0	0	0	0
154300	1	1	1	0	0	0	0	0	0
154400	1	1	1	0	0	0	0	0	0
154500	1	1	1	0	0	0	0	0	0
154600	1	1	1	0	0	0	0	0	0
154700	1	1	1	0	0	0	0	0	0
154800	1	1	1	0	0	0	0	0	0
154900	1	1	1	0	0	0	0	0	0
155000	1	1	1	0	0	0	0	0	0
155100	1	1	1	0	0	0	0	0	0
155200	1	1	1	0	0	0	0	0	0
155300	1	1	1	0	0	0	0	0	0
155400	1	1	1	0	0	0	0	0	0
155500	1	1	1	0	0	0	0	0	0
155600	1	1	1	0	0	0	0	0	0
155700	1	1	1	0	0	0	0	0	0
155800	1	1	1	0	0	0	0	0	0
155900	1	1	1	0	0	0	0	0	0
156000	1	1	1	0	0	0	0	0	0
156100	1	1	1	0	0	0	0	0	0
156200	1	1	1	0	0	0	0	0	0
156300	1	1	1	0	0	0	0	0	0
156400	1	1	1	0	0	0	0	0	0
156500	1	1	1	0	0	0	0	0	0
156600	1	1	1	0	0	0	0	0	0
156700	1	1	1	0	0	0	0	0	0
156800	1	1	1	0	0	0	0	0	0
156900	1	1	1	0	0	0	0	0	0
157000	1	1	1	0	0	0	0	0	0
157100	1	1	1	0	0	0	0	0	0
157200	1	1	1	0	0	0	0	0	0
157300	1	1	1	0	0	0	0	0	0
157400	1	1	1	0	0	0	0	0	0
157500	1	1	1	0	0	0	0	0	0
157600	1	1	1	0	0	0	0	0	0
157700	1	1	1	0	0	0	0	0	0
157800	1	1	1	0	0	0	0	0	0
157900	1	1	1	0	0	0	0	0	0
158000	1	1	1	0	0	0	0	0	0
158100	1	1	1	0	0	0	0	0	0
158200	1	1	1	0	0	0	0	0	0
158300	1	1	1	0	0	0	0	0	0
158400	1	1	1	0	0	0	0	0	0
158500	1	1	1	0	0	0	0	0	0
158600	1	1	1	0	0	0	0	0	0
158700	1	1	1	0	0	0	0	0	0
158800	1	1	1	0	0	0	0	0	0
158900	1	1	1	0	0	0	0	0	0
159000	1	1	1	0	0	0	0	0	0
159100	1	1	1	0	0	0	0	0	0
159200	1	1	1	0	0	0	0	0	0
159300	1	1	1	0	0	0	0	0	0
159400	1	1	1	0	0	0	0	0	0
159500	1	1	1	0	0	0	0	0	0
159600	1	1	1	0	0	0	0	0	0
159700	1	1	1	0	0	0	0	0	0
159800	1	1	1	0	0	0	0	0	0
159900	1	1	1	0	0	0	0	0	0
160000	1	1	1	0	0	0	0	0	0
160100	1	1	1	0	0	0	0	0	0
160200	1	1	1	0	0	0	0	0	0
160300	1	1	1	0	0	0	0	0	0
160400	1	1	1	0	0	0	0	0	0
160500	1	1	1	0	0	0	0	0	0
160600	1	1	1	0	0	0	0	0	0
160700	1	1	1	0	0	0	0	0	0
160800	1	1	1	0	0	0	0	0	0
160900	1	1	1	0	0	0	0	0	0
161000	1	1	1	0	0	0	0	0	0
161100	1	1	1	0	0	0	0	0	0
161200	1	1	1	0	0	0	0	0	0
161300	1	1	1	0	0	0	0	0	0
161400	1	1	1	0	0	0	0	0	0
161500	1	1	1	0	0	0	0	0	0
161600	1	1	1	0	0	0	0	0	0
161700	1	1	1	0	0	0	0	0	0
161800	1	1	1	0	0	0	0	0	0
161900	1	1	1	0	0	0	0	0	0
162000	1	1	1	0	0	0	0	0	0
162100	1	1	1	0	0	0	0	0	0
162200	1	1	1	0	0	0	0	0	0
162300	1	1	1	0	0	0	0	0	0
162400	1	1	1	0	0	0	0	0	0
162500	1	1	1	0	0	0	0	0	0
162600	1	1	1	0	0	0	0	0	0
162700	1	1	1	0	0	0	0	0	0
162800	1	1	1	0	0	0	0	0	0
162900	1	1	1	0	0	0	0	0	0
163000	1	1	1	0	0	0	0	0	0
163100	1	1	1	0	0	0	0	0	0
163200	1	1	1	0	0	0	0	0	0
163300	1	1	1	0	0	0	0	0	0
163400	1	1	1	0	0	0	0	0	0
163500	1	1	1	0	0	0	0	0	0
163600	1	1	1	0	0	0	0	0	0
163700	1	1	1	0	0	0	0	0	0
163800	1	1	1	0	0	0	0	0	0
163900	1	1	1	0	0	0	0	0	0
164000	1	1	1	0	0	0	0	0	0
164100	1	1	1	0	0	0	0	0	0
164200	1	1	1	0	0	0	0	0	0
164300	1	1	1	0	0	0	0	0	0
164400	1	1	1	0	0	0	0	0	0
164500	1	1	1	0	0	0	0	0	0
164600	1	1	1	0	0	0	0	0	0
164700	1	1	1	0	0	0	0	0	0
164800	1	1	1	0	0	0	0	0	0
164900	1	1	1	0	0	0	0	0	0
165000	1	1	1	0	0	0	0	0	0
165100	1	1	1	0	0	0	0	0	0
165200	1	1	1	0	0	0	0	0	0
165300	1	1	1	0	0	0	0	0	0
165400	1	1	1	0	0	0	0	0	0
165500	1	1	1	0	0	0	0	0	0
165600	1	1	1	0	0	0	0	0	0
165700	1	1	1	0	0	0	0	0	0
165800	1	1	1	0	0	0	0	0	0
165900	1	1	1	0	0	0	0	0	0
166000	1	1	1	0	0	0	0	0	0
166100	1	1	1	0	0	0	0	0	0
166200	1	1	1	0	0	0	0	0	0
166300	1	1	1	0	0	0	0	0	0
166400	1	1	1	0	0	0	0	0	0
166500	1	1	1	0	0	0	0	0	0
166600	1	1	1	0	0	0	0	0	0
166700	1	1	1	0	0	0	0	0	0
166800	1	1	1	0	0	0	0	0	0
166900	1	1	1	0	0	0	0	0	0
167000	1	1	1	0	0	0	0	0	0
167100	1	1	1	0	0	0	0	0	0
167200	1	1	1	0	0	0	0	0	0
167300	1	1	1	0	0	0	0	0	0
167400	1	1	1	0	0	0	0	0	0
167500	1	1	1	0	0	0	0	0	0
167600	1	1	1	0	0	0	0	0	0
167700	1	1	1	0	0	0	0	0	0
167800	1	1	1	0	0	0	0	0	0
167900	1	1	1	0	0	0	0	0	0
168000	1	1	1	0	0	0	0	0	0
168100	1	1	1	0	0	0	0	0	0
168200	1	1	1	0	0	0	0	0	0
168300	1	1	1	0	0	0	0	0	0
168400	1	1	1	0	0	0	0	0	0
168500	1	1	1	0	0	0	0	0	0
168600	1	1	1	0	0	0	0	0	0
168700	1	1	1	0	0	0	0	0	0
168800	1	1	1	0	0	0	0	0	0
168900	1	1	1	0	0	0	0	0	0
169000	1	1	1	0	0	0	0	0	0
169100	1	1	1	0	0	0	0	0	0
169200	1	1	1	0	0	0	0	0	0
169300	1	1	1	0	0	0	0	0	0
169400	1	1	1	0	0	0	0	0	0
169500	1	1	1	0	0	0	0	0	0
169600	1	1	1	0	0	0	0	0	0
169700	1	1	1	0	0	0	0	0	0
169800	1	1	1	0	0	0	0	0	0
169900	1	1	1	0	0	0	0	0	0
170000	1	1	1	0	0	0	0	0	0
170100	1	1	1	0	0	0	0	0	0
170200	1	1	1	0	0	0	0	0	0
170300	1	1	1	0	0	0	0	0	0
170400	1	1	1	0	0	0	0	0	0
170500	1	1	1	0	0	0	0	0	0
170600	1	1	1	0	0	0	0	0	0
170700	1	1	1	0	0	0	0	0	0
170800	1	1	1	0	0	0	0	0	0
170900	1	1	1	0	0	0	0	0	0
171000	1	1	1	0	0	0	0	0	0
171100	1	1	1	0	0	0	0	0	0
171200	1	1	1	0	0	0	0	0	0
171300	1	1	1	0	0	0	0	0	0
171400	1	1	1	0	0	0	0	0	0
171500	1	1	1	0	0	0	0	0	0
171600	1	1	1	0	0	0	0	0	0
171700	1	1	1	0	0	0	0	0	0
171800	1	1	1	0	0	0	0	0	0
171900	1	1	1	0	0	0	0	0	0
172000	1	1	1	0	0	0	0	0	0
172100	1	1	1	0	0	0	0	0	0
172200	1	1	1	0	0	0	0	0	0
172300	1	1	1	0	0	0	0	0	0
172400	1	1	1	0	0	0	0	0	0
172500	1	1	1	0	0	0	0	0	0
172600	1	1	1	0	0	0	0	0	0
172700	1	1	1	0	0	0	0	0	0
172800	1	1	1	0	0	0	0	0	0
172900	1	1	1	0	0	0	0	0	0
173000	1	1	1	0	0	0	0	0	0
173100	1	1	1	0	0	0	0	0	0
173200	1	1	1	0	0	0	0	0	0
173300	1	1	1	0	0	0	0	0	0
173400	1	1	1	0	0	0	0	0	0
173500	1	1	1	0	0	0	0	0	0
173600	1	1	1	0	0	0	0	0	0
173700	1	1	1	0	0	0	0	0	0
173800	1	1	1	0	0	0	0	0	0
173900	1	1	1	0	0	0	0	0	0
174000	1	1	1	0	0	0	0	0	0
174100	1	1	1	0	0	0	0	0	0
174200	1	1	1	0	0	0	0	0	0
174300	1	1	1	0	0	0	0	0	0
174400	1	1	1	0	0	0	0	0	0
174500	1	1	1	0	0	0	0	0	0
174600	1	1	1	0	0	0	0	0	0
174700	1	1	1	0	0	0	0	0	0
174800	1	1	1	0	0	0	0	0	0
174900	1	1	1	0	0	0	0	0	0
175000	1	1	1	0	0	0	0	0	0
175100	1	1	1	0	0	0	0	0	0
175200	1	1	1	0	0	0	0	0	0
175300	1	1	1	0	0	0	0	0	0
175400	1	1	1	0	0	0	0	0	0
175500	1	1	1	0	0	0	0	0	0
175600	1	1	1	0	0	0	0	0	0
175700	1	1	1	0	0	0	0	0	0
175800	1	1	1	0	0	0	0	0	0
175900	1	1	1	0	0	0	0	0	0
176000	1	1	1	0	0	0	0	0	0
176100	1	1	1	0	0	0	0	0	0
176200	1	1	1	0	0	0	0	0	0
176300	1	1	1	0	0	0	0	0	0
176400	1	1	1	0	0	0	0	0	0
176500	1	1	1	0	0	0	0	0	0
176600	1	1	1	0	0	0	0	0	0
176700	1	1	1	0	0	0	0	0	0
176800	1	1	1	0	0	0	0	0	0
176900	1	1	1	0	0	0	0	0	0
177000	1	1	1	0	0	0	0	0	0
177100	1	1	1	0	0	0	0	0	0
177200	1	1	1	0	0	0	0	0	0
177300	1	1	1	0	0	0	0	0	0
177400	1	1	1	0	0	0	0	0	0
177500	1	1	1	0	0	0	0	0	0
177600	1	1	1	0	0	0	0	0	0
177700	1	1	1	0	0	0	0	0	0
177800	1	1	1	0	0	0	0	0	0
177900	1	1	1	0	0	0	0	0	0
178000	1	1	1	0	0	0	0	0	0
178100	1	1	1	0	0	0	0	0	0
178200	1	1	1	0	0	0	0	0	0
178300	1	1	1	0	0	0	0	0	0
178400	1	1	1	0	0	0	0	0	0
178500	1	1	1	0	0	0	0	0	0
178600	1	1	1	0	0	0	0	0	0
178700	1	1	1	0	0	0	0	0	0
178800	1	1	1	0	0	0	0	0	0
178900	1	1	1	0	0	0	0	0	0
179000	1	1	1	0	0	0	0	0	0
179100	1	1	1	0	0	0	0	0	0
179200	1	1	1	0	0	0	0	0	0
179300	1	1	1	0	0	0	0	0	0
179400	1	1	1	0	0	0	0	0	0
179500	1	1	1	0	0	0	0	0	0
179600	1	1	1	0	0	0	0	0	0
179700	1	1	1	0	0	0	0	0	0
179800	1	1	1	0	0	0	0	0	0
179900	1	1	1	0	0	0	0	0	0
180000	1	1	1	0	0	0	0	0	0
180100	1	1	1	0	0	0	0	0	0
180200	1	1	1	0	0	0	0	0	0
180300	1	1	1	0	0	0	0	0	0
180400	1	1	1	0	0	0	0	0	0
180500	1	1	1	0	0	0	0	0	0
180600	1	1	1	0	0	0	0	0	0
180700	1	1	1	0	0	0	0	0	0
180800	1	1	1	0	0	0	0	0	0
180900	1	1	1	0	0	0	0	0	0
181000	1	1	1	0	0	0	0	0	0
181100	1	1	1	0	0	0	0	0	0
181200	1	1	1	0	0	0	0	0	0
181300	1	1	1	0	0	0	0	0	0
181400	1	1	1	0	0	0	0	0	0
181500	1	1	1	0	0	0	0	0	0
181600	1	1	1	0	0	0	0	0	0
181700	1	1	1	0	0	0	0	0	0
181800	1	1	1	0	0	0	0	0	0
181900	1	1	1	0	0	0	0	0	0
182000	1	1	1	0	0	0	0	0	0
182100	1	1	1	0	0	0	0	0	0
182200	1	1	1	0	0	0	0	0	0
182300	1	1	1	0	0	0	0	0	0
182400	1	1	1	0	0	0	0	0	0
182500	1	1	1	0	0	0	0	0	0
182600	1	1	1	0	0	0	0	0	0
182700	1	1	1	0	0	0	0	0	0
182800	1	1	1	0	0	0	0	0	0
182900	1	1	1	0	0	0	0	0	0
183000	1	1	1	0	0	0	0	0	0
183100	1	1	1	0	0	0	0	0	0
183200	1	1	1	0	0	0	0	0	0
183300	1	1	1	0	0	0	0	0	0
183400	1	1	1	0	0	0	0	0	0
183500	1	1	1	0	0	0	0	0	0
183600	1	1	1	0	0	0	0	0	0
183700	1	1	1	0	0	0	0	0	0
183800	1	1	1	0	0	0	0	0	0
183900	1	1	1	0	0	0	0	0	0
184000	1	1	1	0	0	0	0	0	0
184100	1	1	1	0	0	0	0	0	0
184200	1	1	1	0	0	0	0	0	0
184300	1	1	1	0	0	0	0	0	0
184400	1	1	1	0	0	0	0	0	0
184500	1	1	1	0	0	0	0	0	0
184600	1	1	1	0	0	0	0	0	0
184700	1	1	1	0	0	0	0	0	0
184800	1	1	1	0	0	0	0	0	0
184900	1	1	1	0	0	0	0	0	0
185000	1	1	1	0	0	0	0	0	0
185100	1	1	1	0	0	0	0	0	0
185200	1	1	1	0	0	0	0	0	0
185300	1	1	1	0	0	0	0	0	0
185400	1	1	1	0	0	0	0	0	0
185500	1	1	1	0	0	0	0	0	0
185600	1	1	1	0	0	0	0	0	0
185700	1	1	1	0	0	0	0	0	0
185800	1	1	1	0	0	0	0	0	0
185900	1	1	1	0	0	0	0	0	0
186000	1	1	1	0	0	0	0	0	0
186100	1	1	1	0	0	0	0	0	0
186200	1	1	1	0	0	0	0	0	0
186300	1	1	1	0	0	0	0	0	0
186400	1	1	1	0	0	0	0	0	0
186500	1	1	1	0	0	0	0	0	0
186600	1	1	1	0	0	0	0	0	0
186700	1	1	1	0	0	0	0	0	0
186800	1	1	1	0	0	0	0	0	0
186900	1	1	1	0	0	0	0	0	0
187000	1	1	1	0	0	0	0	0	0
187100	1	1	1	0	0	0	0	0	0
187200	1	1	1	0	0	0	0	0	0
187300	1	1	1	0	0	0	0	0	0
187400	1	1	1	0	0	0	0	0	0
187500	1	1	1	0	0	0	0	0	0
187600	1	1	1	0	0	0	0	0	0
187700	1	1	1	0	0	0	0	0	0
187800	1	1	1	0	0	0	0	0	0
187900	1	1	1	0	0	0	0	0	0
188000	1	1	1	0	0	0	0	0	0
188100	1	1	1	0	0	0	0	0	0
188200	1	1	1	0	0	0	0	0	0
188300	1	1	1	0	0	0	0	0	0
188400	1	1	1	0	0	0	0	0	0
188500	1	1	1	0	0	0	0	0	0
188600	1	1	1	0	0	0	0	0	0
188700	1	1	1	0	0	0	0	0	0
188800	1	1	1	0	0	0	0	0	0
188900	1	1	1	0	0	0	0	0	0
189000	1	1	1	0	0	0	0	0	0
189100	1	1	1	0	0	0	0	0	0
189200	1	1	1	0	0	0	0	0	0
189300	1	1	1	0	0	0	0	0	0
189400	1	1	1	0	0	0	0	0	0
189500	1	1	1	0	0	0	0	0	0
189600	1	1	1	0	0	0	0	0	0
189700	1	1	1	0	0	0	0	0	0
189800	1	1	1	0	0	0	0	0	0
189900	1	1	1	0	0	0	0	0	0
190000	1	1	1	0	0	0	0	0	0
190100	1	1	1	0	0	0	0	0	0
190200	1	1	1	0	0	0	0	0	0
190300	1	1	1	0	0	0	0	0	0
190400	1	1	1	0	0	0	0	0	0
190500	1	1	1	0	0	0	0	0	0
190600	1	1	1	0	0	0	0	0	0
190700	1	1	1	0	0	0	0	0	0
190800	1	1	1	0	0	0	0	0	0
190900	1	1	1	0	0	0	0	0	0
191000	1	1	1	0	0	0	0	0	0
191100	1	1	1	0	0	0	0	0	0
191200	1	1	1	0	0	0	0	0	0
191300	1	1	1	0	0	0	0	0	0
191400	1	1	1	0	0	0	0	0	0
191500	1	1	1	0	0	0	0	0	0
191600	1	1	1	0	0	0	0	0	0
191700	1	1	1	0	0	0	0	0	0
191800	1	1	1	0	0	0	0	0	0
191900	1	1	1	0	0	0	0	0	0
192000	1	1	1	0	0	0	0	0	0
192100	1	1	1	0	0	0	0	0	0
192200	1	1	1	0	0	0	0	0	0
192300	1	1	1	0	0	0	0	0	0
192400	1	1	1	0	0	0	0	0	0
192500	1	1	1	0	0	0	0	0	0
192600	1	1	1	0	0	0	0	0	0
192700	1	1	1	0	0	0	0	0	0
192800	1	1	1	0	0	0	0	0	0
192900	1	1	1	0	0	0	0	0	0
193000	1	1	1	0	0	0	0	0	0
193100	1	1	1	0	0	0	0	0	0
193200	1	1	1	0	0	0	0	0	0
193300	1	1	1	0	0	0	0	0	0
193400	1	1	1	0	0	0	0	0	0
193500	1	1	1	0	0	0	0	0	0
193600	1	1	1	0	0	0	0	0	0
193700	1	1	1	0	0	0	0	0	0
193800	1	1	1	0	0	0	0	0	0
193900	1	1	1	0	0	0	0	0	0
194000	1	1	1	0	0	0	0	0	0
194100	1	1	1	0	0	0	0	0	0
194200	1	1	1	0	0	0	0	0	0
194300	1	1	1	0	0	0	0	0	0
194400	1	1	1	0	0	0	0	0	0
194500	1	1	1	0	0	0	0	0	0
194600	1	1	1	0	0	0	0	0	0
194700	1	1	1	0	0	0	0	0	0
194800	1	1	1	0	0	0	0	0	0
194900	1	1	1	0	0	0	0	0	0
195000	1	1	1	0	0	0	0	0	0
195100	1	1	1	0	0	0	0	0	0
195200	1	1	1	0	0	0	0	0	0
195300	1	1	1	0	0	0	0	0	0
195400	1	1	1	0	0	0	0	0	0
195500	1	1	1	0	0	0	0	0	0
195600	1	1	1	0	0	0	0	0	0
195700	1	1	1	0	0	0	0	0	0
195800	1	1	1	0	0	0	0	0	0
195900	1	1	1	0	0	0	0	0	0
196000	1	1	1	0	0	0	0	0	0
196100	1	1	1	0	0	0	0	0	0
196200	1	1	1	0	0	0	0	0	0
196300	1	1	1	0	0	0	0	0	0
196400	1	1	1	0	0	0	0	0	0
196500	1	1	1	0	0	0	0	0	0
196600	1	1	1	0	0	0	0	0	0
196700	1	1	1	0	0	0	0	0	0
196800	1	1	1	0	0	0	0	0	0
196900	1	1	1	0	0	0	0	0	0
197000	1	1	1	0	0	0	0	0	0
197100	1	1	1	0	0	0	0	0	0
197200	1	1	1	0	0	0	0	0	0
197300	1	1	1	0	0	0	0	0	0
197400	1	1	1	0	0	0	0	0	0
197500	1	1	1	0	0	0	0	0	0
197600	1	1	1	0	0	0	0	0	0
197700	1	1	1	0	0	0	0	0	0
197800	1	1	1	0	0	0	0	0	0
197900	1	1	1	0	0	0	0	0	0
198000	1	1	1	0	0	0	0	0	0
198100	1	1	1	0	0	0	0	0	0
198200	1	1	1	0	0	0	0	0	0
198300	1	1	1	0	0	0	0	0	0
198400	1	1	1	0	0	0	0	0	0
198500	1	1	1	0	0	0	0	0	0
198600	1	1	1	0	0	0	0	0	0
198700	1	1	1	0	0	0	0	0	0
198800	1	1	1	0	0	0	0	0	0
198900	1	1	1	0	0	0	0	0	0
199000	1	1	1	0	0	0	0	0	0
199100	1	1	1	0	0	0	0	0	0
199200	1	1	1	0	0	0	0	0	0
199300	1	1	1	0	0	0	0	0	0
199400	1	1	1	0	0	0	0	0	0
199500	1	1	1	0	0	0	0	0	0
199600	1	1	1	0	0	0	0	0	0
199700	1	1	1	0	0	0	0	0	0
199800	1	1	1	0	0	0	0	0	0
199900	1	1	1	0	0	0	0	0	0
[truncated: 1 more rows]

## Sheet: final percentiles
0	0	0	0	0	0	0	0	0	0
100	0	0	0	0	0	0	0	0	0
200	0	0	0	0	0	0	0	0	0
300	0	0	0	0	0	0	0	0	0
400	0	0	0	0	0	0	0	0	0
500	0	0	0	0	0	0	0	0	0
600	0	0	0	0	0	0	0	0	0
700	0	0	0	0	0	0	0	0	0
800	0	0	0	0	0	0	0	0	0
900	0	0	0	0	0	0	0	0	0
1000	0	0	0	0	0	0	0	0	0
1100	0	0	0	0	0	0	0	0	0
1200	0	0	0	0	0	0	0	0	0
1300	0	0	0	0	0	0	0	0	0
1400	0	0	0	0	0	0	0	0	0
1500	0	0	0	0	0	0	0	0	0
1600	0	0	0	0	0	0	0	0	0
1700	0	0	0	0	0	0	0	0	0
1800	0	0	0	0	0	0	0	0	0
1900	0	0	0	0	0	0	0	0	0
2000	0	0	0	0	0	0	0	0	0
2100	0	0	0	0	0	0	0	0	0
2200	0	0	0	0	0	0	0	0	0
2300	0	0	0	0	0	0	0	0	0
2400	0	0	0	0	0	0	0	0	0
2500	0	0	0	0	0	0	0	0	0
2600	0	0	0	0	0	0	0	0	0
2700	0	0	0	0	0	0	0	0	0
2800	0	0	0	0	0	0	0	0	0
2900	0	0	0	0	0	0	0	0	0
3000	0	0	0	0	0	0	0	0	0
3100	0	0	0	0	0	0	0	0	0
3200	0	0	0	0	0	0	0	0	0
3300	0	0	0	0	0	0	0	0	0
3400	0	0	0	0	0	0	0	0	0
3500	0	0	0	0	0	0	0	0	0
3600	0	0	0	0	0	0	0	0	0
3700	0	0	0	0	0	0	0	0	0
3800	0	0	0	0	0	0	0	0	0
3900	0	0	0	0	0	0	0	0	0
4000	0	0	0	0	0	0	0	0	0
4100	0	0	0	0	0	0	0	0	0
4200	0	0	0	0	0	0	0	0	0
4300	0	0	0	0	0	0	0	0	0
4400	0	0	0	0	0	0	0	0	0
4500	0	0	0	0	0	0	0	0	0
4600	0	0	0	0	0	0	0	0	0
4700	0	0	0	0	0	0	0	0	0
4800	0	0	0	0	0	0	0	0	0
4900	0	0	0	0	0	0	0	0	0
5000	0	0	0	0	0	0	0	0	0
5100	0	0	0	0	0	0	0	0	0
5200	0	0	0	0	0	0	0	0	0
5300	0	0	0	0	0	0	0	0	0
5400	0	0	0	0	0	0	0	0	0
5500	0	0	0	0	0	0	0	0	0
5600	0	0	0	0	0	0	0	0	0
5700	0	0	0	0	0	0	0	0	0
5800	0	0	0	0	0	0	0	0	0
5900	0	0	0	0	0	0	0	0	0
6000	0	0	0	0	0	0	0	0	0
6100	0	0	0	0	0	0	0	0	0
6200	0	0	0	0	0	0	0	0	0
6300	0	0	0	0	0	0	0	0	0
6400	0	0	0	0	0	0	0	0	0
6500	0	0	0	0	0	0	0	0	0
6600	0	0	0	0	0	0	0	0	0
6700	0	0	0	0	0	0	0	0	0
6800	0	0	0	0	0	0	0	0	0
6900	0	0	0	0	0	0	0	0	0
7000	0	0	0	0	0	0	0	0	0
7100	0	0	0	0	0	0	0	0	0
7200	0	0	0	0	0	0	0	0	0
7300	0	0	0	0	0	0	0	0	0
7400	0	0	0	0	0	0	0	0	0
7500	0	0	0	0	0	0	0	0	0
7600	0	0	0	0	0	0	0	0	0
7700	0	0	0	0	0	0	0	0	0
7800	0	0	0	0	0	0	0	0	0
7900	0	0	0	0	0	0	0	0	0
8000	0	0	0	0	0	0	0	0	0
8100	0	0	0	0	0	0	0	0	0
8200	0	0	0	0	0	0	0	0	0
8300	0	0	0	0	0	0	0	0	0
8400	0	0	0	0	0	0	0	0	0
8500	0	0	0	0	0	0	0	0	0
8600	0	0	0	0	0	0	0	0	0
8700	0	0	0	0	0	0	0	0	0
8800	0	0	0	0	0	0	0	0	0
8900	0	0	0	0	0	0	0	0	0
9000	0	0	0	0	0	0	0	0	0
9100	0	0	0	0	0	0	0	0	0
9200	0	0	0	0	0	0	0	0	0
9300	0	0	0	0	0	0	0	0	0
9400	0	0	0	0	0	0	0	0	0
9500	0	0	0	0	0	0	0	0	0
9600	0	0	0	0	0	0	0	0	0
9700	0	0	0	0	0	0	0	0	0
9800	0	0	0	0	0	0	0	0	0
9900	0	0	0	0	0	0	0	0	0
10000	0	0	0	0	0	0	0	0	0
10100	0	0	0	0	0	0	0	0	0
10200	0	0	0	0	0	0	0	0	0
10300	0	0	0	0	0	0	0	0	0
10400	0	0	0	0	0	0	0	0	0
10500	0	0	0	0	0	0	0	0	0
10600	0	0	0	0	0	0	0	0	0
10700	0	0	0	0	0	0	0	0	0
10800	0	0	0	0	0	0	0	0	0
10900	0	0	0	0	0	0	0	0	0
11000	0	0	0	0	0	0	0	0	0
11100	0	0	0	0	0	0	0	0	0
11200	0	0	0	0	0	0	0	0	0
11300	0	0	0	0	0	0	0	0	0
11400	0	0	0	0	0	0	0	0	0
11500	0	0	0	0	0	0	0	0	0
11600	0	0	0	0	0	0	0	0	0
11700	0	0	0	0	0	0	0	0	0
11800	0	0	0	0	0	0	0	0	0
11900	0	0	0	0	0	0	0	0	0
12000	0	0	0	0	0	0	0	0	0
12100	0	0	0	0	0	0	0	0	0
12200	0	0	0	0	0	0	0	0	0
12300	0	0	0	0	0	0	0	0	0
12400	0	0	0	0	0	0	0	0	0
12500	0	0	0	0	0	0	0	0	0
12600	0	0	0	0	0	0	0	0	0
12700	0	0	0	0	0	0	0	0	0
12800	0	0	0	0	0	0	0	0	0
12900	0	0	0	0	0	0	0	0	0
13000	0	0	0	0	0	0	0	0	0
13100	0	0	0	0	0	0	0	0	0
13200	0	0	0	0	0	0	0	0	0
13300	0	0	0	0	0	0	0	0	0
13400	0	0	0	0	0	0	0	0	0
13500	0	0	0	0	0	0	0	0	0
13600	0	0	0	0	0	0	0	0	0
13700	0	0	0	0	0	0	0	0	0
13800	0	0	0	0	0	0	0	0	0
13900	0	0	0	0	0	0	0	0	0
14000	0	0	0	0	0	0	0	0	0
14100	0	0	0	0	0	0	0	0	0
14200	0	0	0	0	0	0	0	0	0
14300	0	0	0	0	0	0	0	0	0
14400	0	0	0	0	0	0	0	0	0
14500	0	0	0	0	0	0	0	0	0
14600	0	0	0	0	0	0	0	0	0
14700	0	0	0	0	0	0	0	0	0
14800	0	0	0	0	0	0	0	0	0
14900	0	0	0	0	0	0	0	0	0
15000	0	0	0	0	0	0	0	0	0
15100	0	0	0	0	0	0	0	0	0
15200	0	0	0	0	0	0	0	0	0
15300	0	0	0	0	0	0	0	0	0
15400	0	0	0	0	0	0	0	0	0
15500	0	0	0	0	0	0	0	0	0
15600	0	0	0	0	0	0	0	0	0
15700	0	0	0	0	0	0	0	0	0
15800	0	0	0	0	0	0	0	0	0
15900	0	0	0	0	0	0	0	0	0
16000	0	0	0	0	0	0	0	0	0
16100	0	0	0	0	0	0	0	0	0
16200	0	0	0	0	0	0	0	0	0
16300	0	0	0	0	0	0	0	0	0
16400	0	0	0	0	0	0	0	0	0
16500	0	0	0	0	0	0	0	0	0
16600	0	0	0	0	0	0	0	0	0
16700	0	0	0	0	0	0	0	0	0
16800	0	0	0	0	0	0	0	0	0
16900	0	0	0	0	0	0	0	0	0
17000	0	0	0	0	0	0	0	0	0
17100	0	0	0	0	0	0	0	0	0
17200	0	0	0	0	0	0	0	0	0
17300	0	0	0	0	0	0	0	0	0
17400	0	0	0	0	0	0	0	0	0
17500	0	0	0	0	0	0	0	0	0
17600	0	0	0	0	0	0	0	0	0
17700	0	0	0	0	0	0	0	0	0
17800	0	0	0	0	0	0	0	0	0
17900	0	0	0	0	0	0	0	0	0
18000	0	0	0	0	0	0	0	0	0
18100	0	0	0	0	0	0	0	0	0
18200	0	0	0	0	0	0	0	0	0
18300	0	0	0	0	0	0	0	0	0
18400	0	0	0	0	0	0	0	0	0
18500	0	0	0	0	0	0	0	0	0
18600	0	0	0	0	0	0	0	0	0
18700	0	0	0	0	0	0	0	0	0
18800	0	0	0	0	0	0	0	0	0
18900	0	0	0	0	0	0	0	0	0
19000	0	0	0	0	0	0	0	0	0
19100	0	0	0	0	0	0	0	0	0
19200	0	0	0	0	0	0	0	0	0
19300	0	0	0	0	0	0	0	0	0
19400	0	0	0	0	0	0	0	0	0
19500	0	0	0	0	0	0	0	0	0
19600	0	0	0	0	0	0	0	0	0
19700	0	0	0	0	0	0	0	0	0
19800	0	0	0	0	0	0	0	0	0
19900	0	0	0	0	0	0	0	0	0
20000	0	0	0	0	0	0	0	0	0
20100	0	0	0	0	0	0	0	0	0
20200	0	0	0	0	0	0	0	0	0
20300	0	0	0	0	0	0	0	0	0
20400	0	0	0	0	0	0	0	0	0
20500	0	0	0	0	0	0	0	0	0
20600	0	0	0	0	0	0	0	0	0
20700	0	0	0	0	0	0	0	0	0
20800	0	0	0	0	0	0	0	0	0
20900	0	0	0	0	0	0	0	0	0
21000	0	0	0	0	0	0	0	0	0
21100	0	0	0	0	0	0	0	0	0
21200	0	0	0	0	0	0	0	0	0
21300	0	0	0	0	0	0	0	0	0
21400	0	0	0	0	0	0	0	0	0
21500	0	0	0	0	0	0	0	0	0
21600	0	0	0	0	0	0	0	0	0
21700	0	0	0	0	0	0	0	0	0
21800	0	0	0	0	0	0	0	0	0
21900	0	0	0	0	0	0	0	0	0
22000	0	0	0	0	0	0	0	0	0
22100	0	0	0	0	0	0	0	0	0
22200	0	0	0	0	0	0	0	0	0
22300	0	0	0	0	0	0	0	0	0
22400	0	0	0	0	0	0	0	0	0
22500	0	0	0	0	0	0	0	0	0
22600	0	0	0	0	0	0	0	0	0
22700	0	0	0	0	0	0	0	0	0
22800	0	0	0	0	0	0	0	0	0
22900	0	0	0	0	0	0	0	0	0
23000	0	0	0	0	0	0	0	0	0
23100	0	0	0	0	0	0	0	0	0
23200	0	0	0	0	0	0	0	0	0
23300	0	0	0	0	0	0	0	0	0
23400	0	0	0	0	0	0	0	0	0
23500	0	0	0	0	0	0	0	0	0
23600	0	0	0	0	0	0	0	0	0
23700	0	0	0	0	0	0	0	0	0
23800	0	0	0	0	0	0	0	0	0
23900	0	0	0	0	0	0	0	0	0
24000	0	0	0	0	0	0	0	0	0
24100	0	0	0	0	0	0	0	0	0
24200	0	0	0	0	0	0	0	0	0
24300	0	0	0	0	0	0	0	0	0
24400	0	0	0	0	0	0	0	0	0
24500	0	0	0	0	0	0	0	0	0
24600	0	0	0	0	0	0	0	0	0
24700	0	0	0	0	0	0	0	0	0
24800	0	0	0	0	0	0	0	0	0
24900	0	0	0	0	0	0	0	0	0
25000	0	0	0	0	0	0	0	0	0
25100	0	0	0	0	0	0	0	0	0
25200	0	0	0	0	0	0	0	0	0
25300	0	0	0	0	0	0	0	0	0
25400	0	0	0	0	0	0	0	0	0
25500	0	0	0	0	0	0	0	0	0
25600	0	0	0	0	0	0	0	0	0
25700	0	0	0	0	0	0	0	0	0
25800	0	0	0	0	0	0	0	0	0
25900	0	0	0	0	0	0	0	0	0
26000	0	0	0	0	0	0	0	0	0
26100	0	0	0	0	0	0	0	0	0
26200	0	0	0	0	0	0	0	0	0
26300	0	0	0	0	0	0	0	0	0
26400	0	0	0	0	0	0	0	0	0
26500	0	0	0	0	0	0	0	0	0
26600	0	0	0	0	0	0	0	0	0
26700	0	0	0	0	0	0	0	0	0
26800	0	0	0	0	0	0	0	0	0
26900	0	0	0	0	0	0	0	0	0
27000	0	0	0	0	0	0	0	0	0
27100	0	0	0	0	0	0	0	0	0
27200	0	0	0	0	0	0	0	0	0
27300	0	0	0	0	0	0	0	0	0
27400	0	0	0	0	0	0	0	0	0
27500	0	0	0	0	0	0	0	0	0
27600	0	0	0	0	0	0	0	0	0
27700	0	0	0	0	0	0	0	0	0
27800	0	0	0	0	0	0	0	0	0
27900	0	0	0	0	0	0	0	0	0
28000	0	0	0	0	0	0	0	0	0
28100	0	0	0	0	0	0	0	0	0
28200	0	0	0	0	0	0	0	0	0
28300	0	0	0	0	0	0	0	0	0
28400	0	0	0	0	0	0	0	0	0
28500	0	0	0	0	0	0	0	0	0
28600	0	0	0	0	0	0	0	0	0
28700	0	0	0	0	0	0	0	0	0
28800	0	0	0	0	0	0	0	0	0
28900	0	0	0	0	0	0	0	0	0
29000	0	0	0	0	0	0	0	0	0
29100	0	0	0	0	0	0	0	0	0
29200	0	0	0	0	0	0	0	0	0
29300	0	0	0	0	0	0	0	0	0
29400	0	0	0	0	0	0	0	0	0
29500	0	0	0	0	0	0	0	0	0
29600	0	0	0	0	0	0	0	0	0
29700	0	0	0	0	0	0	0	0	0
29800	0	0	0	0	0	0	0	0	0
29900	0	0	0	0	0	0	0	0	0
30000	0	0	0	0	0	0	0	0	0
30100	0	0	0	0	0	0	0	0	0
30200	0	0	0	0	0	0	0	0	0
30300	0	0	0	0	0	0	0	0	0
30400	0	0	0	0	0	0	0	0	0
30500	0	0	0	0	0	0	0	0	0
30600	0	0	0	0	0	0	0	0	0
30700	0	0	0	0	0	0	0	0	0
30800	0	0	0	0	0	0	0	0	0
30900	0	0	0	0	0	0	0	0	0
31000	0	0	0	0	0	0	0	0	0
31100	0	0	0	0	0	0	0	0	0
31200	0	0	0	0	0	0	0	0	0
31300	0	0	0	0	0	0	0	0	0
31400	0	0	0	0	0	0	0	0	0
31500	0	0	0	0	0	0	0	0	0
31600	0	0	0	0	0	0	0	0	0
31700	0	0	0	0	0	0	0	0	0
31800	0	0	0	0	0	0	0	0	0
31900	0	0	0	0	0	0	0	0	0
32000	0	0	0	0	0	0	0	0	0
32100	0	0	0	0	0	0	0	0	0
32200	0	0	0	0	0	0	0	0	0
32300	0	0	0	0	0	0	0	0	0
32400	0	0	0	0	0	0	0	0	0
32500	0	0	0	0	0	0	0	0	0
32600	0	0	0	0	0	0	0	0	0
32700	0	0	0	0	0	0	0	0	0
32800	0	0	0	0	0	0	0	0	0
32900	0	0	0	0	0	0	0	0	0
33000	0	0	0	0	0	0	0	0	0
33100	0	0	0	0	0	0	0	0	0
33200	0	0	0	0	0	0	0	0	0
33300	0	0	0	0	0	0	0	0	0
33400	0	0	0	0	0	0	0	0	0
33500	0	0	0	0	0	0	0	0	0
33600	0	0	0	0	0	0	0	0	0
33700	0	0	0	0	0	0	0	0	0
33800	0	0	0	0	0	0	0	0	0
33900	0	0	0	0	0	0	0	0	0
34000	0	0	0	0	0	0	0	0	0
34100	0	0	0	0	0	0	0	0	0
34200	0	0	0	0	0	0	0	0	0
34300	0	0	0	0	0	0	0	0	0
34400	0	0	0	0	0	0	0	0	0
34500	0	0	0	0	0	0	0	0	0
34600	0	0	0	0	0	0	0	0	0
34700	0	0	0	0	0	0	0	0	0
34800	0	0	0	0	0	0	0	0	0
34900	0	0	0	0	0	0	0	0	0
35000	0	0	0	0	0	0	0	0	0
35100	0	0	0	0	0	0	0	0	0
35200	0	0	0	0	0	0	0	0	0
35300	0	0	0	0	0	0	0	0	0
35400	0	0	0	0	0	0	0	0	0
35500	0	0	0	0	0	0	0	0	0
35600	0	0	0	0	0	0	0	0	0
35700	0	0	0	0	0	0	0	0	0
35800	0	0	0	0	0	0	0	0	0
35900	0	0	0	0	0	0	0	0	0
36000	0	0	0	0	0	0	0	0	0
36100	0	0	0	0	0	0	0	0	0
36200	0	0	0	0	0	0	0	0	0
36300	0	0	0	0	0	0	0	0	0
36400	0	0	0	0	0	0	0	0	0
36500	0	0	0	0	0	0	0	0	0
36600	0	0	0	0	0	0	0	0	0
36700	0	0	0	0	0	0	0	0	0
36800	0	0	0	0	0	0	0	0	0
36900	0	0	0	0	0	0	0	0	0
37000	0	0	0	0	0	0	0	0	0
37100	0	0	0	0	0	0	0	0	0
37200	0	0	0	0	0	0	0	0	0
37300	0	0	0	0	0	0	0	0	0
37400	0	0	0	0	0	0	0	0	0
37500	0	0	0	0	0	0	0	0	0
37600	0	0	0	0	0	0	0	0	0
37700	0	0	0	0	0	0	0	0	0
37800	0	0	0	0	0	0	0	0	0
37900	0	0	0	0	0	0	0	0	0
38000	0	0	0	0	0	0	0	0	0
38100	0	0	0	0	0	0	0	0	0
38200	0	0	0	0	0	0	0	0	0
38300	0	0	0	0	0	0	0	0	0
38400	0	0	0	0	0	0	0	0	0
38500	0	0	0	0	0	0	0	0	0
38600	0	0	0	0	0	0	0	0	0
38700	0	0	0	0	0	0	0	0	0
38800	0	0	0	0	0	0	0	0	0
38900	0	0	0	0	0	0	0	0	0
39000	0	0	0	0	0	0	0	0	0
39100	0	0	0	0	0	0	0	0	0
39200	0	0	0	0	0	0	0	0	0
39300	0	0	0	0	0	0	0	0	0
39400	0	0	0	0	0	0	0	0	0
39500	0	0	0	0	0	0	0	0	0
39600	0	0	0	0	0	0	0	0	0
39700	0	0	0	0	0	0	0	0	0
39800	0	0	0	0	0	0	0	0	0
39900	0	0	0	0	0	0	0	0	0
40000	0	0	0	0	0	0	0	0	0
40100	0	0	0	0	0	0	0	0	0
40200	0	0	0	0	0	0	0	0	0
40300	0	0	0	0	0	0	0	0	0
40400	0	0	0	0	0	0	0	0	0
40500	0	0	0	0	0	0	0	0	0
40600	0	0	0	0	0	0	0	0	0
40700	0	0	0	0	0	0	0	0	0
40800	0	0	0	0	0	0	0	0	0
40900	0	0	0	0	0	0	0	0	0
41000	0	0	0	0	0	0	0	0	0
41100	0	0	0	0	0	0	0	0	0
41200	0	0	0	0	0	0	0	0	0
41300	0	0	0	0	0	0	0	0	0
41400	0	0	0	0	0	0	0	0	0
41500	0	0	0	0	0	0	0	0	0
41600	0	0	0	0	0	0	0	0	0
41700	0	0	0	0	0	0	0	0	0
41800	0	0	0	0	0	0	0	0	0
41900	0	0	0	0	0	0	0	0	0
42000	0	0	0	0	0	0	0	0	0
42100	0	0	0	0	0	0	0	0	0
42200	0	0	0	0	0	0	0	0	0
42300	0	0	0	0	0	0	0	0	0
42400	0	0	0	0	0	0	0	0	0
42500	0	0	0	0	0	0	0	0	0
42600	0	0	0	0	0	0	0	0	0
42700	0	0	0	0	0	0	0	0	0
42800	0	0	0	0	0	0	0	0	0
42900	0	0	0	0	0	0	0	0	0
43000	0	0	0	0	0	0	0	0	0
43100	0	0	0	0	0	0	0	0	0
43200	0	0	0	0	0	0	0	0	0
43300	0	0	0	0	0	0	0	0	0
43400	0	0	0	0	0	0	0	0	0
43500	0	0	0	0	0	0	0	0	0
43600	0	0	0	0	0	0	0	0	0
43700	0	0	0	0	0	0	0	0	0
43800	0	0	0	0	0	0	0	0	0
43900	0	0	0	0	0	0	0	0	0
44000	0	0	0	0	0	0	0	0	0
44100	0	0	0	0	0	0	0	0	0
44200	0	0	0	0	0	0	0	0	0
44300	0	0	0	0	0	0	0	0	0
44400	0	0	0	0	0	0	0	0	0
44500	0	0	0	0	0	0	0	0	0
44600	0	0	0	0	0	0	0	0	0
44700	0	0	0	0	0	0	0	0	0
44800	0	0	0	0	0	0	0	0	0
44900	0	0	0	0	0	0	0	0	0
45000	0	0	0	0	0	0	0	0	0
45100	0	0	0	0	0	0	0	0	0
45200	0	0	0	0	0	0	0	0	0
45300	0	0	0	0	0	0	0	0	0
45400	0	0	0	0	0	0	0	0	0
45500	0	0	0	0	0	0	0	0	0
45600	0	0	0	0	0	0	0	0	0
45700	0	0	0	0	0	0	0	0	0
45800	0	0	0	0	0	0	0	0	0
45900	0	0	0	0	0	0	0	0	0
46000	0	0	0	0	0	0	0	0	0
46100	0	0	0	0	0	0	0	0	0
46200	0	0	0	0	0	0	0	0	0
46300	0	0	0	0	0	0	0	0	0
46400	0	0	0	0	0	0	0	0	0
46500	0	0	0	0	0	0	0	0	0
46600	0	0	0	0	0	0	0	0	0
46700	0	0	0	0	0	0	0	0	0
46800	0	0	0	0	0	0	0	0	0
46900	0	0	0	0	0	0	0	0	0
47000	0	0	0	0	0	0	0	0	0
47100	0	0	0	0	0	0	0	0	0
47200	0	0	0	0	0	0	0	0	0
47300	0	0	0	0	0	0	0	0	0
47400	0	0	0	0	0	0	0	0	0
47500	0	0	0	0	0	0	0	0	0
47600	0	0	0	0	0	0	0	0	0
47700	0	0	0	0	0	0	0	0	0
47800	0	0	0	0	0	0	0	0	0
47900	0	0	0	0	0	0	0	0	0
48000	0	0	0	0	0	0	0	0	0
48100	0	0	0	0	0	0	0	0	0
48200	0	0	0	0	0	0	0	0	0
48300	0	0	0	0	0	0	0	0	0
48400	0	0	0	0	0	0	0	0	0
48500	0	0	0	0	0	0	0	0	0
48600	0	0	0	0	0	0	0	0	0
48700	0	0	0	0	0	0	0	0	0
48800	0	0	0	0	0	0	0	0	0
48900	0	0	0	0	0	0	0	0	0
49000	0	0	0	0	0	0	0	0	0
49100	0	0	0	0	0	0	0	0	0
49200	0	0	0	0	0	0	0	0	0
49300	0	0	0	0	0	0	0	0	0
49400	0	0	0	0	0	0	0	0	0
49500	0	0	0	0	0	0	0	0	0
49600	0	0	0	0	0	0	0	0	0
49700	0	0	0	0	0	0	0	0	0
49800	0	0	0	0	0	0	0	0	0
49900	0	0	0	0	0	0	0	0	0
50000	0	0	0	0	0	0	0	0	0
50100	0	0	0	0	0	0	0	0	0
50200	0	0	0	0	0	0	0	0	0
50300	0	0	0.075	0	0	0	0	0	0
50400	0	0	0.075	0	0	0	0	0	0
50500	0	0	0.075	0	0	0	0	0	0
50600	0	0	0.075	0	0	0	0	0	0
50700	0	0	0.075	0	0	0	0	0	0
50800	0	0	0.075	0	0	0	0	0	0
50900	0	0	0.15	0	0	0	0	0	0
51000	0	0	0.225	0	0	0	0	0	0
51100	0	0	0.3	0	0	0	0	0	0
51200	0	0	0.375	0	0	0	0	0	0
51300	0	0	0.375	0	0	0	0	0	0
51400	0	0	0.45	0	0	0	0	0	0
51500	0	0	0.525	0	0	0	0	0	0
51600	0	0	0.6	0	0	0	0	0	0
51700	0	0	0.675	0	0	0	0	0	0
51800	0	0	0.75	0	0	0	0	0	0
51900	0	0	0.675	0	0	0	0	0	0
52000	0	0	0.6	0	0	0	0	0	0
52100	0	0	0.525	0	0	0	0	0	0
52200	0	0	0.45	0	0	0	0	0	0
52300	0	0	0.375	0	0	0	0	0	0
52400	0	0	0.3	0	0	0	0	0	0
52500	0	0	0.225	0	0	0.075	0	0	0
52600	0	0	0.15	0	0	0.075	0	0	0
52700	0	0	0.075	0	0	0.075	0	0	0
52800	0	0	0	0	0	0.075	0	0	0
52900	0	0	0	0	0	0.075	0	0	0
53000	0	0	0	0	0	0.075	0	0	0
53100	0	0	0	0	0	0.075	0	0	0
53200	0	0	0	0	0	0.075	0	0	0
53300	0	0	0	0	0	0.075	0	0	0
53400	0	0	0	0	0	0.075	0	0	0
53500	0	0	0	0	0	0	0	0	0
53600	0	0	0.075	0	0	0	0	0	0
53700	0	0	0.075	0	0	0	0	0	0
53800	0	0	0.15	0	0	0	0	0	0
53900	0	0	0.225	0	0	0	0	0	0
54000	0	0	0.3	0	0	0	0	0	0
54100	0	0	0.375	0	0	0	0	0	0
54200	0	0	0.45	0	0	0	0	0	0
54300	0	0	0.525	0	0	0	0	0	0
54400	0	0	0.6	0	0	0	0	0	0
54500	0	0	0.675	0	0	0	0	0	0
54600	0	0	0.675	0	0	0	0	0	0
54700	0	0	0.75	0	0	0	0	0	0
54800	0	0	0.75	0	0	0	0	0	0
54900	0	0	0.75	0	0	0	0	0	0
55000	0	0	0.675	0	0	0	0	0	0
55100	0	0	0.6	0	0	0	0	0	0
55200	0	0	0.525	0	0	0	0	0	0
55300	0	0	0.45	0	0	0	0	0	0
55400	0	0	0.375	0	0	0	0	0	0
55500	0	0	0.3	0	0	0	0	0	0
55600	0	0	0.225	0	0	0	0	0	0
55700	0	0	0.15	0	0	0	0	0	0
55800	0	0	0.075	0	0	0	0	0	0
55900	0	0	0	0	0	0	0	0	0
56000	0	0	0	0	0	0	0	0	0
56100	0	0	0	0	0	0	0	0	0
56200	0	0	0	0	0	0	0	0	0
56300	0	0	0	0	0	0	0	0	0
56400	0	0	0	0	0	0	0	0	0
56500	0	0	0	0	0	0	0	0	0
56600	0	0	0	0	0	0	0	0	0
56700	0	0	0	0	0	0	0	0	0
56800	0	0	0.075	0	0	0	0	0	0
56900	0	0	0.075	0	0	0	0	0	0
57000	0	0	0.15	0	0	0	0	0	0
57100	0	0	0.225	0	0	0	0	0	0
57200	0	0	0.3	0	0	0	0	0	0
57300	0	0	0.375	0	0	0	0	0	0
57400	0	0	0.45	0	0	0	0	0	0
57500	0	0	0.525	0	0	0	0	0	0
57600	0	0	0.6	0	0	0	0	0	0
57700	0	0	0.675	0	0	0	0	0	0
57800	0	0	0.675	0	0	0	0	0	0
57900	0	0	0.75	0	0	0	0	0	0
58000	0	0	0.75	0	0	0	0	0	0
58100	0	0	0.75	0	0	0	0	0	0
58200	0	0	0.75	0	0	0	0	0	0
58300	0	0	0.675	0	0	0	0	0	0
58400	0	0	0.6	0	0	0	0	0	0
58500	0	0	0.525	0	0	0	0	0	0
58600	0	0	0.45	0	0	0	0	0	0
58700	0	0	0.375	0	0	0	0	0	0
58800	0	0	0.3	0	0	0	0	0	0
58900	0	0	0.225	0	0	0	0	0	0
59000	0	0	0.15	0	0	0	0	0	0
59100	0	0	0.075	0	0	0	0	0	0
59200	0	0	0	0	0	0	0	0	0
59300	0	0	0	0	0	0	0	0	0
59400	0	0	0	0	0	0	0	0	0
59500	0	0	0	0	0	0	0	0	0
59600	0	0	0	0	0	0	0	0	0
59700	0	0	0	0	0	0	0	0	0
59800	0	0	0	0	0	0	0	0	0
59900	0	0	0	0	0	0	0	0	0
60000	0	0	0	0	0	0	0	0	0
60100	0	0	0	0	0	0	0	0	0
60200	0	0	0.075	0	0	0	0	0	0
60300	0	0	0.15	0	0	0	0	0	0
60400	0	0	0.225	0	0	0	0	0	0
60500	0	0	0.3	0	0	0	0	0	0
60600	0	0	0.375	0	0	0	0	0	0
60700	0	0	0.475	0	0	0	0	0	0
60800	0	0	0.575	0	0	0	0	0	0
60900	0	0	0.65	0	0	0	0	0	0
61000	0	0	0.75	0	0	0	0	0	0
61100	0	0	0.85	0	0	0	0	0	0
61200	0	0	0.875	0	0	0	0	0	0
61300	0	0	0.9	0	0	0	0	0	0
61400	0	0	0.925	0	0	0	0	0	0
61500	0	0	0.95	0	0	0	0	0	0
61600	0	0	0.975	0	0	0	0	0	0
61700	0	0	0.975	0	0	0	0	0	0
61800	0	0	0.975	0	0	0	0	0	0
61900	0	0	1	0	0	0	0	0	0
62000	0	0	0.975	0	0	0	0	0	0
62100	0	0	0.95	0	0	0	0	0	0
62200	0	0	0.925	0	0	0	0	0	0
62300	0	0	0.9	0	0	0	0	0	0
62400	0	0	0.875	0	0	0	0	0	0
62500	0	0	0.85	0	0	0	0	0	0
62600	0	0	0.825	0	0	0	0	0	0
62700	0	0	0.8	0	0	0	0	0	0
62800	0	0	0.775	0	0	0	0	0	0
62900	0	0	0.75	0	0	0	0	0	0
63000	0	0	0.75	0	0	0	0	0	0
63100	0	0	0.775	0	0	0	0	0	0
63200	0	0	0.775	0	0	0	0	0	0
63300	0	0	0.775	0	0	0	0	0	0
63400	0	0	0.775	0	0	0	0	0	0
63500	0	0	0.775	0	0	0	0	0	0
63600	0	0	0.775	0	0	0	0	0	0
63700	0	0	0.8	0	0	0	0	0	0
63800	0	0	0.825	0	0	0	0	0	0
63900	0	0	0.825	0	0	0	0	0	0
64000	0	0	0.85	0	0	0	0	0	0
64100	0	0	0.85	0	0	0	0	0	0
64200	0	0	0.875	0	0	0	0	0	0
64300	0	0	0.9	0	0	0	0	0	0
64400	0	0	0.925	0	0	0	0	0	0
64500	0	0	0.95	0	0	0	0	0	0
64600	0	0	0.975	0	0	0	0	0	0
64700	0	0	0.975	0	0	0	0	0	0
64800	0	0	0.975	0	0	0	0	0	0
64900	0	0	1	0	0	0	0	0	0
65000	0	0	1	0	0	0	0	0	0
65100	0	0	1	0	0	0	0	0	0
65200	0	0	1	0	0	0	0	0	0
65300	0	0.05	1	0	0	0	0	0	0
65400	0	0.1	1	0	0	0	0	0	0
65500	0	0.15	1	0	0	0	0	0	0
65600	0	0.2	1	0	0	0	0	0	0
65700	0	0.25	1	0	0	0	0	0	0
65800	0	0.3	1	0	0	0	0	0	0
65900	0	0.4	1	0	0	0	0	0	0
66000	0	0.5	1	0	0	0	0	0	0
66100	0	0.6	1	0	0	0	0	0	0
66200	0	0.6	1	0	0	0	0	0	0
66300	0	0.55	1	0	0	0	0	0	0
66400	0	0.5	1	0	0	0	0	0	0
66500	0	0.45	0.975	0	0	0	0	0	0
66600	0	0.4	0.95	0	0	0	0	0	0
66700	0	0.35	0.925	0	0	0	0	0	0
66800	0	0.3	0.9	0	0	0	0	0	0
66900	0	0.2	0.875	0	0	0	0	0	0
67000	0	0.1	0.85	0	0	0	0	0	0
67100	0	0	0.825	0	0	0	0	0	0
67200	0	0	0.8	0	0	0	0	0	0
67300	0	0	0.8	0	0	0	0	0	0
67400	0	0	0.775	0	0	0	0	0	0
67500	0	0	0.775	0	0	0	0	0	0
67600	0	0	0.775	0	0	0	0	0	0
67700	0	0	0.8	0	0	0	0	0	0
67800	0	0	0.8	0	0	0	0	0	0
67900	0	0.05	0.825	0	0	0	0	0	0
68000	0	0.1	0.85	0	0	0	0	0	0
68100	0	0.15	0.875	0	0	0	0	0	0
68200	0	0.2	0.9	0	0	0	0	0	0
68300	0	0.25	0.9	0	0	0	0	0	0
68400	0	0.35	0.925	0	0	0	0	0	0
68500	0	0.45	0.95	0	0	0	0	0	0
68600	0	0.5	0.975	0	0	0	0	0	0
68700	0	0.6	0.975	0	0	0	0	0	0
68800	0	0.7	1	0	0	0	0	0	0
68900	0	0.75	1	0	0	0	0	0	0
69000	0.025	0.8	1	0	0	0	0	0	0
69100	0.025	0.8	1	0	0	0	0	0	0
69200	0.025	0.8	1	0	0	0	0	0	0
69300	0.025	0.8	1	0	0	0	0	0	0
69400	0.025	0.75	1	0	0	0	0	0	0
69500	0.025	0.7	1	0	0	0	0	0	0
69600	0.025	0.7	1	0	0	0	0	0	0
69700	0.025	0.7	1	0	0	0	0	0	0
69800	0.025	0.65	1	0	0	0	0	0	0
69900	0.025	0.65	1	0	0	0	0	0	0
70000	0	0.65	1	0	0	0	0	0	0
70100	0	0.7	1	0	0	0	0	0	0
70200	0	0.75	1	0	0	0	0	0	0
70300	0.025	0.8	1	0	0	0	0	0	0
70400	0.025	0.85	1	0	0	0	0	0	0
70500	0.05	0.9	1	0	0	0	0	0	0
70600	0.05	0.95	1	0	0	0	0	0	0
70700	0.05	0.9	1	0	0	0	0	0	0
70800	0.05	0.9	1	0	0	0	0	0	0
70900	0.05	0.85	1	0	0	0	0	0	0
71000	0.05	0.75	1	0	0	0	0	0	0
71100	0.05	0.65	1	0	0	0	0	0	0
71200	0.05	0.55	1	0	0	0	0	0	0
71300	0.025	0.45	1	0	0	0	0	0	0
71400	0.025	0.35	1	0	0	0	0	0	0
71500	0	0.25	1	0	0	0	0	0	0
71600	0	0.15	1	0	0	0	0	0	0
71700	0	0.15	1	0	0	0	0	0	0
71800	0	0.1	1	0	0	0	0	0	0
71900	0	0.05	1	0	0	0	0	0	0
72000	0	0.05	1	0	0	0	0	0	0
72100	0	0.05	1	0	0	0	0	0	0
72200	0	0.05	1	0	0	0	0	0	0
72300	0	0.05	1	0	0	0	0	0	0
72400	0	0.05	1	0	0	0	0	0	0
72500	0	0.1	1	0	0	0	0	0	0
72600	0	0.1	1	0	0	0	0	0	0
72700	0	0.05	1	0	0	0	0	0	0
72800	0	0.05	1	0	0	0	0	0	0
72900	0	0.15	1	0	0	0	0	0	0
73000	0	0.25	1	0	0	0	0	0	0
73100	0	0.35	1	0	0	0	0	0	0
73200	0.025	0.45	1	0	0	0	0	0	0
73300	0.025	0.55	1	0	0	0	0	0	0
73400	0.025	0.65	1	0	0	0	0	0	0
73500	0.025	0.7	1	0	0	0	0	0	0
73600	0.025	0.8	1	0	0	0	0	0	0
73700	0.025	0.9	1	0	0	0	0	0	0
73800	0.025	1	1	0	0	0	0	0	0
73900	0.025	1	1	0	0	0	0	0	0
74000	0.05	1	1	0	0	0	0	0	0
74100	0.05	1	1	0	0	0	0	0	0
74200	0.025	1	1	0	0	0	0	0	0
74300	0.025	0.95	1	0	0	0	0	0	0
74400	0.025	0.95	1	0	0	0	0	0	0
74500	0.025	0.95	1	0	0	0	0	0	0
74600	0.025	0.95	1	0	0	0	0	0	0
74700	0.025	0.95	1	0	0	0	0	0	0
74800	0.025	0.95	1	0	0	0	0	0	0
74900	0.025	0.95	1	0	0	0	0	0	0
75000	0	0.95	1	0	0	0	0	0	0
75100	0.025	0.95	1	0	0	0	0	0	0
75200	0.025	0.95	1	0	0	0	0	0	0
75300	0.025	1	1	0	0	0	0	0	0
75400	0.025	1	1	0	0	0	0	0	0
75500	0.025	1	1	0	0	0	0	0	0
75600	0.025	0.95	1	0	0	0	0	0	0
75700	0.025	0.9	1	0	0	0	0	0	0
75800	0.025	0.9	1	0	0	0	0	0	0
75900	0.025	0.85	1	0	0	0	0	0	0
76000	0.025	0.85	1	0	0	0	0	0	0
76100	0	0.85	1	0	0	0	0	0	0
76200	0	0.85	1	0	0	0	0	0	0
76300	0.025	0.85	1	0	0	0	0	0	0
76400	0.025	0.85	1	0	0	0	0	0	0
76500	0.05	0.85	1	0	0	0	0	0	0
76600	0.075	0.9	1	0	0	0	0	0	0
76700	0.175	0.95	1	0	0	0	0	0	0
76800	0.175	0.95	1	0	0	0	0	0	0
76900	0.2	1	1	0	0	0	0	0	0
77000	0.225	1	1	0	0	0	0	0	0
77100	0.225	1	1	0	0	0	0	0	0
77200	0.25	1	1	0	0	0	0	0	0
77300	0.225	1	1	0	0	0	0	0	0
77400	0.225	1	1	0	0	0	0	0	0
77500	0.2	1	1	0	0	0	0	0	0
77600	0.2	1	1	0	0	0	0	0	0
77700	0.125	1	1	0	0	0	0	0	0
77800	0.15	1	1	0	0	0	0	0	0
77900	0.15	1	1	0	0	0	0	0	0
78000	0.15	1	1	0	0	0	0	0	0
78100	0.25	1	1	0	0	0	0	0	0
78200	0.25	1	1	0	0	0	0	0	0
78300	0.275	1	1	0	0	0	0	0	0
78400	0.375	1	1	0	0	0	0	0	0
78500	0.4	1	1	0	0	0	0	0	0
78600	0.4	1	1	0	0	0	0	0	0
78700	0.4	1	1	0	0	0	0	0	0
78800	0.475	1	1	0	0	0	0	0	0
78900	0.55	1	1	0	0	0	0	0	0
79000	0.625	1	1	0	0	0	0	0	0
79100	0.625	1	1	0	0	0	0	0	0
79200	0.7	1	1	0	0	0	0	0	0
79300	0.775	1	1	0	0	0	0	0	0
79400	0.775	1	1	0	0	0	0	0	0
79500	0.85	1	1	0	0	0	0	0	0
79600	0.925	1	1	0	0	0	0	0	0
79700	1	1	1	0	0	0	0	0	0
79800	0.925	1	1	0	0	0	0	0	0
79900	0.85	1	1	0	0	0	0	0	0
80000	0.775	1	1	0	0	0	0	0	0
80100	0.7	1	1	0	0	0	0	0	0
80200	0.625	1	1	0	0	0	0	0	0
80300	0.55	1	1	0	0	0	0	0	0
80400	0.475	1	1	0	0	0	0	0	0
80500	0.4	1	1	0	0	0	0	0	0
80600	0.325	1	1	0	0	0	0	0	0
80700	0.25	1	1	0	0	0	0	0	0
80800	0.25	1	1	0	0	0	0	0	0
80900	0.325	1	1	0	0	0	0	0	0
81000	0.325	1	1	0	0	0	0	0	0
81100	0.325	1	1	0	0	0	0	0	0
81200	0.325	1	1	0	0	0	0	0	0
81300	0.325	1	1	0	0	0	0	0	0
81400	0.325	1	1	0	0	0	0	0	0
81500	0.325	1	1	0	0	0	0	0	0
81600	0.325	1	1	0	0	0	0	0	0
81700	0.325	1	1	0	0	0	0	0	0
81800	0.4	1	1	0	0	0	0	0	0
81900	0.4	1	1	0	0	0	0	0	0
82000	0.475	1	1	0	0	0	0	0	0
82100	0.55	1	1	0	0	0	0	0	0
82200	0.625	1	1	0	0	0	0	0	0
82300	0.7	1	1	0	0	0	0	0	0
82400	0.775	1	1	0	0	0	0	0	0
82500	0.85	1	1	0	0	0	0	0	0
82600	0.925	1	1	0	0	0	0	0	0
82700	1	1	1	0	0	0	0	0	0
82800	1	1	1	0	0	0	0	0	0
82900	1	1	1	0	0	0	0	0	0
83000	1	1	1	0	0	0	0	0	0
83100	1	1	1	0	0	0	0	0	0
83200	1	1	1	0	0	0	0	0	0
83300	1	1	1	0	0	0	0	0	0
83400	0.925	1	1	0	0	0	0	0	0
83500	0.85	1	1	0	0	0	0	0	0
83600	0.775	1	1	0	0	0	0	0	0
83700	0.7	1	1	0	0	0	0	0	0
83800	0.625	1	1	0	0	0	0	0	0
83900	0.55	1	1	0	0	0	0	0	0
84000	0.475	1	1	0	0	0	0	0	0
84100	0.4	1	1	0	0	0	0	0	0
84200	0.325	1	1	0	0	0	0	0	0
84300	0.25	1	1	0	0	0	0	0	0
84400	0.25	1	1	0	0	0	0	0	0
84500	0.25	1	1	0	0	0	0	0	0
84600	0.25	1	1	0	0	0	0	0	0
84700	0.25	1	1	0	0	0	0	0	0
84800	0.25	1	1	0	0	0	0	0	0
84900	0.25	1	1	0	0	0	0	0	0
85000	0.25	1	1	0	0	0	0	0	0
85100	0.25	1	1	0	0	0	0	0	0
85200	0.25	1	1	0	0	0	0	0	0
85300	0.325	1	1	0	0	0	0	0	0
85400	0.4	1	1	0	0	0	0	0	0
85500	0.475	1	1	0	0	0	0	0	0
85600	0.55	1	1	0	0	0	0	0	0
85700	0.625	1	1	0	0	0	0	0	0
85800	0.7	1	1	0	0	0	0	0	0
85900	0.775	1	1	0	0	0	0	0	0
86000	0.85	1	1	0	0	0	0	0	0
86100	0.925	1	1	0	0	0	0	0	0
86200	1	1	1	0	0	0	0	0	0
86300	1	1	1	0	0	0	0	0	0
86400	1	1	1	0	0	0	0	0	0
86500	1	1	1	0	0	0	0	0	0
86600	1	1	1	0	0	0	0	0	0
86700	1	1	1	0	0	0	0	0	0
86800	1	1	1	0	0	0	0	0	0
86900	1	1	1	0	0	0	0	0	0
87000	1	1	1	0	0	0	0	0	0
87100	1	1	1	0	0	0	0	0	0
87200	1	1	1	0	0	0	0	0	0
87300	1	1	1	0	0	0	0	0	0
87400	1	1	1	0	0	0	0	0	0
87500	1	1	1	0	0	0	0	0	0
87600	1	1	1	0	0	0	0	0	0
87700	0.925	1	1	0	0	0	0	0	0
87800	0.85	1	1	0	0	0	0	0	0
87900	0.775	1	1	0	0	0	0	0	0
88000	0.7	1	1	0	0	0	0	0	0
88100	0.625	1	1	0	0	0	0	0	0
88200	0.55	1	1	0	0	0	0	0	0
88300	0.475	1	1	0	0	0	0	0	0
88400	0.4	1	1	0	0	0	0	0	0
88500	0.325	1	1	0	0	0	0	0	0
88600	0.25	1	1	0	0	0	0	0	0
88700	0.25	1	1	0	0	0	0	0	0
88800	0.25	1	1	0	0	0	0	0	0
88900	0.25	1	1	0	0	0	0	0	0
89000	0.25	1	1	0	0	0	0	0	0
89100	0.25	1	1	0	0	0	0	0	0
89200	0.325	1	1	0	0	0	0	0	0
89300	0.4	1	1	0	0	0	0	0	0
89400	0.4	1	1	0	0	0	0	0	0
89500	0.475	1	1	0	0	0	0	0	0
89600	0.475	1	1	0	0	0	0	0	0
89700	0.55	1	1	0	0	0	0	0	0
89800	0.625	1	1	0	0	0	0	0	0
89900	0.7	1	1	0	0	0	0	0	0
90000	0.775	1	1	0	0	0	0	0	0
90100	0.85	1	1	0	0	0	0	0	0
90200	0.85	1	1	0	0	0	0	0	0
90300	0.85	1	1	0	0	0	0	0	0
90400	0.925	1	1	0	0	0	0	0	0
90500	0.925	1	1	0	0	0	0	0	0
90600	1	1	1	0	0	0	0	0	0
90700	1	1	1	0	0	0	0	0	0
90800	1	1	1	0	0	0	0	0	0
90900	1	1	1	0	0	0	0	0	0
91000	1	1	1	0	0	0	0	0	0
91100	1	1	1	0	0	0	0	0	0
91200	1	1	1	0	0	0	0	0	0
91300	1	1	1	0	0	0	0	0	0
91400	1	1	1	0	0	0	0	0	0
91500	1	1	1	0	0	0	0	0	0
91600	1	1	1	0	0	0	0	0	0
91700	1	1	1	0	0	0	0	0	0
91800	1	1	1	0	0	0	0	0	0
91900	1	1	1	0	0	0	0	0	0
92000	1	1	1	0	0	0	0	0	0
92100	1	1	1	0	0	0	0	0	0
92200	1	1	1	0	0	0	0	0	0
92300	1	1	1	0	0	0	0	0	0
92400	1	1	1	0	0	0	0	0	0
92500	1	1	1	0	0	0	0	0	0
92600	1	1	1	0	0	0	0	0	0
92700	1	1	1	0	0	0	0	0	0
92800	1	1	1	0	0	0	0	0	0
92900	1	1	1	0	0	0	0	0	0
93000	1	1	1	0	0	0	0	0	0
93100	1	1	1	0	0	0	0	0	0
93200	1	1	1	0	0	0	0	0	0
93300	1	1	1	0	0	0	0	0	0
93400	1	1	1	0	0	0	0	0	0
93500	1	1	1	0	0	0	0	0	0
93600	1	1	1	0	0	0	0	0	0
93700	1	1	1	0	0	0	0	0	0
93800	1	1	1	0	0	0	0	0	0
93900	1	1	1	0	0	0	0	0	0
94000	1	1	1	0	0	0	0	0	0
94100	1	1	1	0	0	0	0	0	0
94200	1	1	1	0	0	0	0	0	0
94300	1	1	1	0	0	0	0	0	0
94400	1	1	1	0	0	0	0	0	0
94500	1	1	1	0	0	0	0	0	0
94600	1	1	1	0	0	0	0	0	0
94700	1	1	1	0	0	0	0	0	0
94800	1	1	1	0	0	0	0	0	0
94900	1	1	1	0	0	0	0	0	0
95000	1	1	1	0	0	0	0	0	0
95100	1	1	1	0	0	0	0	0	0
95200	1	1	1	0	0	0	0	0	0
95300	1	1	1	0	0	0	0	0	0
95400	1	1	1	0	0	0	0	0	0
95500	1	1	1	0	0	0	0	0	0
95600	1	1	1	0	0	0	0	0	0
95700	1	1	1	0	0	0	0	0	0
95800	1	1	1	0	0	0	0	0	0
95900	1	1	1	0	0	0	0	0	0
96000	1	1	1	0	0	0	0	0	0
96100	1	1	1	0	0	0	0	0	0
96200	1	1	1	0	0	0	0	0	0
96300	1	1	1	0	0	0	0	0	0
96400	1	1	1	0	0	0	0	0	0
96500	1	1	1	0	0	0	0	0	0
96600	1	1	1	0	0	0	0	0	0
96700	1	1	1	0	0	0	0	0	0
96800	1	1	1	0	0	0	0	0	0
96900	1	1	1	0	0	0	0	0	0
97000	1	1	1	0	0	0	0	0	0
97100	1	1	1	0	0	0	0	0	0
97200	1	1	1	0	0	0	0	0	0
97300	1	1	1	0	0	0	0	0	0
97400	1	1	1	0	0	0	0	0	0
97500	1	1	1	0	0	0	0	0	0
97600	1	1	1	0	0	0	0	0	0
97700	1	1	1	0	0	0	0	0	0
97800	1	1	1	0	0	0	0	0	0
97900	1	1	1	0	0	0	0	0	0
98000	1	1	1	0	0	0	0	0	0
98100	1	1	1	0	0	0	0	0	0
98200	1	1	1	0	0	0	0	0	0
98300	1	1	1	0	0	0	0	0	0
98400	1	1	1	0	0	0	0	0	0
98500	1	1	1	0	0	0	0	0	0
98600	1	1	1	0	0	0	0	0	0
98700	1	1	1	0	0	0	0	0	0
98800	1	1	1	0	0	0	0	0	0
98900	1	1	1	0	0	0	0	0	0
99000	1	1	1	0	0	0	0	0	0
99100	1	1	1	0	0	0	0	0	0
99200	1	1	1	0	0	0	0	0	0
99300	1	1	1	0	0	0	0	0	0
99400	1	1	1	0	0	0	0	0	0
99500	1	1	1	0	0	0	0	0	0
99600	1	1	1	0	0	0	0	0	0
99700	1	1	1	0	0	0	0	0	0
99800	1	1	1	0	0	0	0	0	0
99900	1	1	1	0	0	0	0	0	0
100000	1	1	1	0	0	0	0	0	0
100100	1	1	1	0	0	0	0	0	0
100200	1	1	1	0	0	0	0	0	0
100300	1	1	1	0	0	0	0	0	0
100400	1	1	1	0	0	0	0	0	0
100500	1	1	1	0	0	0	0	0	0
100600	1	1	1	0	0	0	0	0	0
100700	1	1	1	0	0	0	0	0	0
100800	1	1	1	0	0	0	0	0	0
100900	1	1	1	0	0	0	0	0	0
101000	1	1	1	0	0	0	0	0	0
101100	1	1	1	0	0	0	0	0	0
101200	1	1	1	0	0	0	0	0	0
101300	1	1	1	0	0	0	0	0	0
101400	1	1	1	0	0	0	0	0	0
101500	1	1	1	0	0	0	0	0	0
101600	1	1	1	0	0	0	0	0	0
101700	1	1	1	0	0	0	0	0	0
101800	1	1	1	0	0	0	0	0	0
101900	1	1	1	0	0	0	0	0	0
102000	1	1	1	0	0	0	0	0	0
102100	1	1	1	0	0	0	0	0	0
102200	1	1	1	0	0	0	0	0	0
102300	1	1	1	0	0	0	0	0	0
102400	1	1	1	0	0	0	0	0	0
102500	1	1	1	0	0	0	0	0	0
102600	1	1	1	0	0	0	0	0	0
102700	1	1	1	0	0	0	0	0	0
102800	1	1	1	0	0	0	0	0	0
102900	1	1	1	0	0	0	0	0	0
103000	1	1	1	0	0	0	0	0	0
103100	1	1	1	0	0	0	0	0	0
103200	1	1	1	0	0	0	0	0	0
103300	1	1	1	0	0	0	0	0	0
103400	1	1	1	0	0	0	0	0	0
103500	1	1	1	0	0	0	0	0	0
103600	1	1	1	0	0	0	0	0	0
103700	1	1	1	0	0	0	0	0	0
103800	1	1	1	0	0	0	0	0	0
103900	1	1	1	0	0	0	0	0	0
104000	1	1	1	0	0	0	0	0	0
104100	1	1	1	0	0	0	0	0	0
104200	1	1	1	0	0	0	0	0	0
104300	1	1	1	0	0	0	0	0	0
104400	1	1	1	0	0	0	0	0	0
104500	1	1	1	0	0	0	0	0	0
104600	1	1	1	0	0	0	0	0	0
104700	1	1	1	0	0	0	0	0	0
104800	1	1	1	0	0	0	0	0	0
104900	1	1	1	0	0	0	0	0	0
105000	1	1	1	0	0	0	0	0	0
105100	1	1	1	0	0	0	0	0	0
105200	1	1	1	0	0	0	0	0	0
105300	1	1	1	0	0	0	0	0	0
105400	1	1	1	0	0	0	0	0	0
105500	1	1	1	0	0	0	0	0	0
105600	1	1	1	0	0	0	0	0	0
105700	1	1	1	0	0	0	0	0	0
105800	1	1	1	0	0	0	0	0	0
105900	1	1	1	0	0	0	0	0	0
106000	1	1	1	0	0	0	0	0	0
106100	1	1	1	0	0	0	0	0	0
106200	1	1	1	0	0	0	0	0	0
106300	1	1	1	0	0	0	0	0	0
106400	1	1	1	0	0	0	0	0	0
106500	1	1	1	0	0	0	0	0	0
106600	1	1	1	0	0	0	0	0	0
106700	1	1	1	0	0	0	0	0	0
106800	1	1	1	0	0	0	0	0	0
106900	1	1	1	0	0	0	0	0	0
107000	1	1	1	0	0	0	0	0	0
107100	1	1	1	0	0	0	0	0	0
107200	1	1	1	0	0	0	0	0	0
107300	1	1	1	0	0	0	0	0	0
107400	1	1	1	0	0	0	0	0	0
107500	1	1	1	0	0	0	0	0	0
107600	1	1	1	0	0	0	0	0	0
107700	1	1	1	0	0	0	0	0	0
107800	1	1	1	0	0	0	0	0	0
107900	1	1	1	0	0	0	0	0	0
108000	1	1	1	0	0	0	0	0	0
108100	1	1	1	0	0	0	0	0	0
108200	1	1	1	0	0	0	0	0	0
108300	1	1	1	0	0	0	0	0	0
108400	1	1	1	0	0	0	0	0	0
108500	1	1	1	0	0	0	0	0	0
108600	1	1	1	0	0	0	0	0	0
108700	1	1	1	0	0	0	0	0	0
108800	1	1	1	0	0	0	0	0	0
108900	1	1	1	0	0	0	0	0	0
109000	1	1	1	0	0	0	0	0	0
109100	1	1	1	0	0	0	0	0	0
109200	1	1	1	0	0	0	0	0	0
109300	1	1	1	0	0	0	0	0	0
109400	1	1	1	0	0	0	0	0	0
109500	1	1	1	0	0	0	0	0	0
109600	1	1	1	0	0	0	0	0	0
109700	1	1	1	0	0	0	0	0	0
109800	1	1	1	0	0	0	0	0	0
109900	1	1	1	0	0	0	0	0	0
110000	1	1	1	0	0	0	0	0	0
110100	1	1	1	0	0	0	0	0	0
110200	1	1	1	0	0	0	0	0	0
110300	1	1	1	0	0	0	0	0	0
110400	1	1	1	0	0	0	0	0	0
110500	1	1	1	0	0	0	0	0	0
110600	1	1	1	0	0	0	0	0	0
110700	1	1	1	0	0	0	0	0	0
110800	1	1	1	0	0	0	0	0	0
110900	1	1	1	0	0	0	0	0	0
111000	1	1	1	0	0	0	0	0	0
111100	1	1	1	0	0	0	0	0	0
111200	1	1	1	0	0	0	0	0	0
111300	1	1	1	0	0	0	0	0	0
111400	1	1	1	0	0	0	0	0	0
111500	1	1	1	0	0	0	0	0	0
111600	1	1	1	0	0	0	0	0	0
111700	1	1	1	0	0	0	0	0	0
111800	1	1	1	0	0	0	0	0	0
111900	1	1	1	0	0	0	0	0	0
112000	1	1	1	0	0	0	0	0	0
112100	1	1	1	0	0	0	0	0	0
112200	1	1	1	0	0	0	0	0	0
112300	1	1	1	0	0	0	0	0	0
112400	1	1	1	0	0	0	0	0	0
112500	1	1	1	0	0	0	0	0	0
112600	1	1	1	0	0	0	0	0	0
112700	1	1	1	0	0	0	0	0	0
112800	1	1	1	0	0	0	0	0	0
112900	1	1	1	0	0	0	0	0	0
113000	1	1	1	0	0	0	0	0	0
113100	1	1	1	0	0	0	0	0	0
113200	1	1	1	0	0	0	0	0	0
113300	1	1	1	0	0	0	0	0	0
113400	1	1	1	0	0	0	0	0	0
113500	1	1	1	0	0	0	0	0	0
113600	1	1	1	0	0	0	0	0	0
113700	1	1	1	0	0	0	0	0	0
113800	1	1	1	0	0	0	0	0	0
113900	1	1	1	0	0	0	0	0	0
114000	1	1	1	0	0	0	0	0	0
114100	1	1	1	0	0	0	0	0	0
114200	1	1	1	0	0	0	0	0	0
114300	1	1	1	0	0	0	0	0	0
114400	1	1	1	0	0	0	0	0	0
114500	1	1	1	0	0	0	0	0	0
114600	1	1	1	0	0	0	0	0	0
114700	1	1	1	0	0	0	0	0	0
114800	1	1	1	0	0	0	0	0	0
114900	1	1	1	0	0	0	0	0	0
115000	1	1	1	0	0	0	0	0	0
115100	1	1	1	0	0	0	0	0	0
115200	1	1	1	0	0	0	0	0	0
115300	1	1	1	0	0	0	0	0	0
115400	1	1	1	0	0	0	0	0	0
115500	1	1	1	0	0	0	0	0	0
115600	1	1	1	0	0	0	0	0	0
115700	1	1	1	0	0	0	0	0	0
115800	1	1	1	0	0	0	0	0	0
115900	1	1	1	0	0	0	0	0	0
116000	1	1	1	0	0	0	0	0	0
116100	1	1	1	0	0	0	0	0	0
116200	1	1	1	0	0	0	0	0	0
116300	1	1	1	0	0	0	0	0	0
116400	1	1	1	0	0	0	0	0	0
116500	1	1	1	0	0	0	0	0	0
116600	1	1	1	0	0	0	0	0	0
116700	1	1	1	0	0	0	0	0	0
116800	1	1	1	0	0	0	0	0	0
116900	1	1	1	0	0	0	0	0	0
117000	1	1	1	0	0	0	0	0	0
117100	1	1	1	0	0	0	0	0	0
117200	1	1	1	0	0	0	0	0	0
117300	1	1	1	0	0	0	0	0	0
117400	1	1	1	0	0	0	0	0	0
117500	1	1	1	0	0	0	0	0	0
117600	1	1	1	0	0	0	0	0	0
117700	1	1	1	0	0	0	0	0	0
117800	1	1	1	0	0	0	0	0	0
117900	1	1	1	0	0	0	0	0	0
118000	1	1	1	0	0	0	0	0	0
118100	1	1	1	0	0	0	0	0	0
118200	1	1	1	0	0	0	0	0	0
118300	1	1	1	0	0	0	0	0	0
118400	1	1	1	0	0	0	0	0	0
118500	1	1	1	0	0	0	0	0	0
118600	1	1	1	0	0	0	0	0	0
118700	1	1	1	0	0	0	0	0	0
118800	1	1	1	0	0	0	0	0	0
118900	1	1	1	0	0	0	0	0	0
119000	1	1	1	0	0	0	0	0	0
119100	1	1	1	0	0	0	0	0	0
119200	1	1	1	0	0	0	0	0	0
119300	1	1	1	0	0	0	0	0	0
119400	1	1	1	0	0	0	0	0	0
119500	1	1	1	0	0	0	0	0	0
119600	1	1	1	0	0	0	0	0	0
119700	1	1	1	0	0	0	0	0	0
119800	1	1	1	0	0	0	0	0	0
119900	1	1	1	0	0	0	0	0	0
120000	1	1	1	0	0	0	0	0	0
120100	1	1	1	0	0	0	0	0	0
120200	1	1	1	0	0	0	0	0	0
120300	1	1	1	0	0	0	0	0	0
120400	1	1	1	0	0	0	0	0	0
120500	1	1	1	0	0	0	0	0	0
120600	1	1	1	0	0	0	0	0	0
120700	1	1	1	0	0	0	0	0	0
120800	1	1	1	0	0	0	0	0	0
120900	1	1	1	0	0	0	0	0	0
121000	1	1	1	0	0	0	0	0	0
121100	1	1	1	0	0	0	0	0	0
121200	1	1	1	0	0	0	0	0	0
121300	1	1	1	0	0	0	0	0	0
121400	1	1	1	0	0	0	0	0	0
121500	1	1	1	0	0	0	0	0	0
121600	1	1	1	0	0	0	0	0	0
121700	1	1	1	0	0	0	0	0	0
121800	1	1	1	0	0	0	0	0	0
121900	1	1	1	0	0	0	0	0	0
122000	1	1	1	0	0	0	0	0	0
122100	1	1	1	0	0	0	0	0	0
122200	1	1	1	0	0	0	0	0	0
122300	1	1	1	0	0	0	0	0	0
122400	1	1	1	0	0	0	0	0	0
122500	1	1	1	0	0	0	0	0	0
122600	1	1	1	0	0	0	0	0	0
122700	1	1	1	0	0	0	0	0	0
122800	1	1	1	0	0	0	0	0	0
122900	1	1	1	0	0	0	0	0	0
123000	1	1	1	0	0	0	0	0	0
123100	1	1	1	0	0	0	0	0	0
123200	1	1	1	0	0	0	0	0	0
123300	1	1	1	0	0	0	0	0	0
123400	1	1	1	0	0	0	0	0	0
123500	1	1	1	0	0	0	0	0	0
123600	1	1	1	0	0	0	0	0	0
123700	1	1	1	0	0	0	0	0	0
123800	1	1	1	0	0	0	0	0	0
123900	1	1	1	0	0	0	0	0	0
124000	1	1	1	0	0	0	0	0	0
124100	1	1	1	0	0	0	0	0	0
124200	1	1	1	0	0	0	0	0	0
124300	1	1	1	0	0	0	0	0	0
124400	1	1	1	0	0	0	0	0	0
124500	1	1	1	0	0	0	0	0	0
124600	1	1	1	0	0	0	0	0	0
124700	1	1	1	0	0	0	0	0	0
124800	1	1	1	0	0	0	0	0	0
124900	1	1	1	0	0	0	0	0	0
125000	1	1	1	0	0	0	0	0	0
125100	1	1	1	0	0	0	0	0	0
125200	1	1	1	0	0	0	0	0	0
125300	1	1	1	0	0	0	0	0	0
125400	1	1	1	0	0	0	0	0	0
125500	1	1	1	0	0	0	0	0	0
125600	1	1	1	0	0	0	0	0	0
125700	1	1	1	0	0	0	0	0	0
125800	1	1	1	0	0	0	0	0	0
125900	1	1	1	0	0	0	0	0	0
126000	1	1	1	0	0	0	0	0	0
126100	1	1	1	0	0	0	0	0	0
126200	1	1	1	0	0	0	0	0	0
126300	1	1	1	0	0	0	0	0	0
126400	1	1	1	0	0	0	0	0	0
126500	1	1	1	0	0	0	0	0	0
126600	1	1	1	0	0	0	0	0	0
126700	1	1	1	0	0	0	0	0	0
126800	1	1	1	0	0	0	0	0	0
126900	1	1	1	0	0	0	0	0	0
127000	1	1	1	0	0	0	0	0	0
127100	1	1	1	0	0	0	0	0	0
127200	1	1	1	0	0	0	0	0	0
127300	1	1	1	0	0	0	0	0	0
127400	1	1	1	0	0	0	0	0	0
127500	1	1	1	0	0	0	0	0	0
127600	1	1	1	0	0	0	0	0	0
127700	1	1	1	0	0	0	0	0	0
127800	1	1	1	0	0	0	0	0	0
127900	1	1	1	0	0	0	0	0	0
128000	1	1	1	0	0	0	0	0	0
128100	1	1	1	0	0	0	0	0	0
128200	1	1	1	0	0	0	0	0	0
128300	1	1	1	0	0	0	0	0	0
128400	1	1	1	0	0	0	0	0	0
128500	1	1	1	0	0	0	0	0	0
128600	1	1	1	0	0	0	0	0	0
128700	1	1	1	0	0	0	0	0	0
128800	1	1	1	0	0	0	0	0	0
128900	1	1	1	0	0	0	0	0	0
129000	1	1	1	0	0	0	0	0	0
129100	1	1	1	0	0	0	0	0	0
129200	1	1	1	0	0	0	0	0	0
129300	1	1	1	0	0	0	0	0	0
129400	1	1	1	0	0	0	0	0	0
129500	1	1	1	0	0	0	0	0	0
129600	1	1	1	0	0	0	0	0	0
129700	1	1	1	0	0	0	0	0	0
129800	1	1	1	0	0	0	0	0	0
129900	1	1	1	0	0	0	0	0	0
130000	1	1	1	0	0	0	0	0	0
130100	1	1	1	0	0	0	0	0	0
130200	1	1	1	0	0	0	0	0	0
130300	1	1	1	0	0	0	0	0	0
130400	1	1	1	0	0	0	0	0	0
130500	1	1	1	0	0	0	0	0	0
130600	1	1	1	0	0	0	0	0	0
130700	1	1	1	0	0	0	0	0	0
130800	1	1	1	0	0	0	0	0	0
130900	1	1	1	0	0	0	0	0	0
131000	1	1	1	0	0	0	0	0	0
131100	1	1	1	0	0	0	0	0	0
131200	1	1	1	0	0	0	0	0	0
131300	1	1	1	0	0	0	0	0	0
131400	1	1	1	0	0	0	0	0	0
131500	1	1	1	0	0	0	0	0	0
131600	1	1	1	0	0	0	0	0	0
131700	1	1	1	0	0	0	0	0	0
131800	1	1	1	0	0	0	0	0	0
131900	1	1	1	0	0	0	0	0	0
132000	1	1	1	0	0	0	0	0	0
132100	1	1	1	0	0	0	0	0	0
132200	1	1	1	0	0	0	0	0	0
132300	1	1	1	0	0	0	0	0	0
132400	1	1	1	0	0	0	0	0	0
132500	1	1	1	0	0	0	0	0	0
132600	1	1	1	0	0	0	0	0	0
132700	1	1	1	0	0	0	0	0	0
132800	1	1	1	0	0	0	0	0	0
132900	1	1	1	0	0	0	0	0	0
133000	1	1	1	0	0	0	0	0	0
133100	1	1	1	0	0	0	0	0	0
133200	1	1	1	0	0	0	0	0	0
133300	1	1	1	0	0	0	0	0	0
133400	1	1	1	0	0	0	0	0	0
133500	1	1	1	0	0	0	0	0	0
133600	1	1	1	0	0	0	0	0	0
133700	1	1	1	0	0	0	0	0	0
133800	1	1	1	0	0	0	0	0	0
133900	1	1	1	0	0	0	0	0	0
134000	1	1	1	0	0	0	0	0	0
134100	1	1	1	0	0	0	0	0	0
134200	1	1	1	0	0	0	0	0	0
134300	1	1	1	0	0	0	0	0	0
134400	1	1	1	0	0	0	0	0	0
134500	1	1	1	0	0	0	0	0	0
134600	1	1	1	0	0	0	0	0	0
134700	1	1	1	0	0	0	0	0	0
134800	1	1	1	0	0	0	0	0	0
134900	1	1	1	0	0	0	0	0	0
135000	1	1	1	0	0	0	0	0	0
135100	1	1	1	0	0	0	0	0	0
135200	1	1	1	0	0	0	0	0	0
135300	1	1	1	0	0	0	0	0	0
135400	1	1	1	0	0	0	0	0	0
135500	1	1	1	0	0	0	0	0	0
135600	1	1	1	0	0	0	0	0	0
135700	1	1	1	0	0	0	0	0	0
135800	1	1	1	0	0	0	0	0	0
135900	1	1	1	0	0	0	0	0	0
136000	1	1	1	0	0	0	0	0	0
136100	1	1	1	0	0	0	0	0	0
136200	1	1	1	0	0	0	0	0	0
136300	1	1	1	0	0	0	0	0	0
136400	1	1	1	0	0	0	0	0	0
136500	1	1	1	0	0	0	0	0	0
136600	1	1	1	0	0	0	0	0	0
136700	1	1	1	0	0	0	0	0	0
136800	1	1	1	0	0	0	0	0	0
136900	1	1	1	0	0	0	0	0	0
137000	1	1	1	0	0	0	0	0	0
137100	1	1	1	0	0	0	0	0	0
137200	1	1	1	0	0	0	0	0	0
137300	1	1	1	0	0	0	0	0	0
137400	1	1	1	0	0	0	0	0	0
137500	1	1	1	0	0	0	0	0	0
137600	1	1	1	0	0	0	0	0	0
137700	1	1	1	0	0	0	0	0	0
137800	1	1	1	0	0	0	0	0	0
137900	1	1	1	0	0	0	0	0	0
138000	1	1	1	0	0	0	0	0	0
138100	1	1	1	0	0	0	0	0	0
138200	1	1	1	0	0	0	0	0	0
138300	1	1	1	0	0	0	0	0	0
138400	1	1	1	0	0	0	0	0	0
138500	1	1	1	0	0	0	0	0	0
138600	1	1	1	0	0	0	0	0	0
138700	1	1	1	0	0	0	0	0	0
138800	1	1	1	0	0	0	0	0	0
138900	1	1	1	0	0	0	0	0	0
139000	1	1	1	0	0	0	0	0	0
139100	1	1	1	0	0	0	0	0	0
139200	1	1	1	0	0	0	0	0	0
139300	1	1	1	0	0	0	0	0	0
139400	1	1	1	0	0	0	0	0	0
139500	1	1	1	0	0	0	0	0	0
139600	1	1	1	0	0	0	0	0	0
139700	1	1	1	0	0	0	0	0	0
139800	1	1	1	0	0	0	0	0	0
139900	1	1	1	0	0	0	0	0	0
140000	1	1	1	0	0	0	0	0	0
140100	1	1	1	0	0	0	0	0	0
140200	1	1	1	0	0	0	0	0	0
140300	1	1	1	0	0	0	0	0	0
140400	1	1	1	0	0	0	0	0	0
140500	1	1	1	0	0	0	0	0	0
140600	1	1	1	0	0	0	0	0	0
140700	1	1	1	0	0	0	0	0	0
140800	1	1	1	0	0	0	0	0	0
140900	1	1	1	0	0	0	0	0	0
141000	1	1	1	0	0	0	0	0	0
141100	1	1	1	0	0	0	0	0	0
141200	1	1	1	0	0	0	0	0	0
141300	1	1	1	0	0	0	0	0	0
141400	1	1	1	0	0	0	0	0	0
141500	1	1	1	0	0	0	0	0	0
141600	1	1	1	0	0	0	0	0	0
141700	1	1	1	0	0	0	0	0	0
141800	1	1	1	0	0	0	0	0	0
141900	1	1	1	0	0	0	0	0	0
142000	1	1	1	0	0	0	0	0	0
142100	1	1	1	0	0	0	0	0	0
142200	1	1	1	0	0	0	0	0	0
142300	1	1	1	0	0	0	0	0	0
142400	1	1	1	0	0	0	0	0	0
142500	1	1	1	0	0	0	0	0	0
142600	1	1	1	0	0	0	0	0	0
142700	1	1	1	0	0	0	0	0	0
142800	1	1	1	0	0	0	0	0	0
142900	1	1	1	0	0	0	0	0	0
143000	1	1	1	0	0	0	0	0	0
143100	1	1	1	0	0	0	0	0	0
143200	1	1	1	0	0	0	0	0	0
143300	1	1	1	0	0	0	0	0	0
143400	1	1	1	0	0	0	0	0	0
143500	1	1	1	0	0	0	0	0	0
143600	1	1	1	0	0	0	0	0	0
143700	1	1	1	0	0	0	0	0	0
143800	1	1	1	0	0	0	0	0	0
143900	1	1	1	0	0	0	0	0	0
144000	1	1	1	0	0	0	0	0	0
144100	1	1	1	0	0	0	0	0	0
144200	1	1	1	0	0	0	0	0	0
144300	1	1	1	0	0	0	0	0	0
144400	1	1	1	0	0	0	0	0	0
144500	1	1	1	0	0	0	0	0	0
144600	1	1	1	0	0	0	0	0	0
144700	1	1	1	0	0	0	0	0	0
144800	1	1	1	0	0	0	0	0	0
144900	1	1	1	0	0	0	0	0	0
145000	1	1	1	0	0	0	0	0	0
145100	1	1	1	0	0	0	0	0	0
145200	1	1	1	0	0	0	0	0	0
145300	1	1	1	0	0	0	0	0	0
145400	1	1	1	0	0	0	0	0	0
145500	1	1	1	0	0	0	0	0	0
145600	1	1	1	0	0	0	0	0	0
145700	1	1	1	0	0	0	0	0	0
145800	1	1	1	0	0	0	0	0	0
145900	1	1	1	0	0	0	0	0	0
146000	1	1	1	0	0	0	0	0	0
146100	1	1	1	0	0	0	0	0	0
146200	1	1	1	0	0	0	0	0	0
146300	1	1	1	0	0	0	0	0	0
146400	1	1	1	0	0	0	0	0	0
146500	1	1	1	0	0	0	0	0	0
146600	1	1	1	0	0	0	0	0	0
146700	1	1	1	0	0	0	0	0	0
146800	1	1	1	0	0	0	0	0	0
146900	1	1	1	0	0	0	0	0	0
147000	1	1	1	0	0	0	0	0	0
147100	1	1	1	0	0	0	0	0	0
147200	1	1	1	0	0	0	0	0	0
147300	1	1	1	0	0	0	0	0	0
147400	1	1	1	0	0	0	0	0	0
147500	1	1	1	0	0	0	0	0	0
147600	1	1	1	0	0	0	0	0	0
147700	1	1	1	0	0	0	0	0	0
147800	1	1	1	0	0	0	0	0	0
147900	1	1	1	0	0	0	0	0	0
148000	1	1	1	0	0	0	0	0	0
148100	1	1	1	0	0	0	0	0	0
148200	1	1	1	0	0	0	0	0	0
148300	1	1	1	0	0	0	0	0	0
148400	1	1	1	0	0	0	0	0	0
148500	1	1	1	0	0	0	0	0	0
148600	1	1	1	0	0	0	0	0	0
148700	1	1	1	0	0	0	0	0	0
148800	1	1	1	0	0	0	0	0	0
148900	1	1	1	0	0	0	0	0	0
149000	1	1	1	0	0	0	0	0	0
149100	1	1	1	0	0	0	0	0	0
149200	1	1	1	0	0	0	0	0	0
149300	1	1	1	0	0	0	0	0	0
149400	1	1	1	0	0	0	0	0	0
149500	1	1	1	0	0	0	0	0	0
149600	1	1	1	0	0	0	0	0	0
149700	1	1	1	0	0	0	0	0	0
149800	1	1	1	0	0	0	0	0	0
149900	1	1	1	0	0	0	0	0	0
150000	1	1	1	0	0	0	0	0	0
150100	1	1	1	0	0	0	0	0	0
150200	1	1	1	0	0	0	0	0	0
150300	1	1	1	0	0	0	0	0	0
150400	1	1	1	0	0	0	0	0	0
150500	1	1	1	0	0	0	0	0	0
150600	1	1	1	0	0	0	0	0	0
150700	1	1	1	0	0	0	0	0	0
150800	1	1	1	0	0	0	0	0	0
150900	1	1	1	0	0	0	0	0	0
151000	1	1	1	0	0	0	0	0	0
151100	1	1	1	0	0	0	0	0	0
151200	1	1	1	0	0	0	0	0	0
151300	1	1	1	0	0	0	0	0	0
151400	1	1	1	0	0	0	0	0	0
151500	1	1	1	0	0	0	0	0	0
151600	1	1	1	0	0	0	0	0	0
151700	1	1	1	0	0	0	0	0	0
151800	1	1	1	0	0	0	0	0	0
151900	1	1	1	0	0	0	0	0	0
152000	1	1	1	0	0	0	0	0	0
152100	1	1	1	0	0	0	0	0	0
152200	1	1	1	0	0	0	0	0	0
152300	1	1	1	0	0	0	0	0	0
152400	1	1	1	0	0	0	0	0	0
152500	1	1	1	0	0	0	0	0	0
152600	1	1	1	0	0	0	0	0	0
152700	1	1	1	0	0	0	0	0	0
152800	1	1	1	0	0	0	0	0	0
152900	1	1	1	0	0	0	0	0	0
153000	1	1	1	0	0	0	0	0	0
153100	1	1	1	0	0	0	0	0	0
153200	1	1	1	0	0	0	0	0	0
153300	1	1	1	0	0	0	0	0	0
153400	1	1	1	0	0	0	0	0	0
153500	1	1	1	0	0	0	0	0	0
153600	1	1	1	0	0	0	0	0	0
153700	1	1	1	0	0	0	0	0	0
153800	1	1	1	0	0	0	0	0	0
153900	1	1	1	0	0	0	0	0	0
154000	1	1	1	0	0	0	0	0	0
154100	1	1	1	0	0	0	0	0	0
154200	1	1	1	0	0	0	0	0	0
154300	1	1	1	0	0	0	0	0	0
154400	1	1	1	0	0	0	0	0	0
154500	1	1	1	0	0	0	0	0	0
154600	1	1	1	0	0	0	0	0	0
154700	1	1	1	0	0	0	0	0	0
154800	1	1	1	0	0	0	0	0	0
154900	1	1	1	0	0	0	0	0	0
155000	1	1	1	0	0	0	0	0	0
155100	1	1	1	0	0	0	0	0	0
155200	1	1	1	0	0	0	0	0	0
155300	1	1	1	0	0	0	0	0	0
155400	1	1	1	0	0	0	0	0	0
155500	1	1	1	0	0	0	0	0	0
155600	1	1	1	0	0	0	0	0	0
155700	1	1	1	0	0	0	0	0	0
155800	1	1	1	0	0	0	0	0	0
155900	1	1	1	0	0	0	0	0	0
156000	1	1	1	0	0	0	0	0	0
156100	1	1	1	0	0	0	0	0	0
156200	1	1	1	0	0	0	0	0	0
156300	1	1	1	0	0	0	0	0	0
156400	1	1	1	0	0	0	0	0	0
156500	1	1	1	0	0	0	0	0	0
156600	1	1	1	0	0	0	0	0	0
156700	1	1	1	0	0	0	0	0	0
156800	1	1	1	0	0	0	0	0	0
156900	1	1	1	0	0	0	0	0	0
157000	1	1	1	0	0	0	0	0	0
157100	1	1	1	0	0	0	0	0	0
157200	1	1	1	0	0	0	0	0	0
157300	1	1	1	0	0	0	0	0	0
157400	1	1	1	0	0	0	0	0	0
157500	1	1	1	0	0	0	0	0	0
157600	1	1	1	0	0	0	0	0	0
157700	1	1	1	0	0	0	0	0	0
157800	1	1	1	0	0	0	0	0	0
157900	1	1	1	0	0	0	0	0	0
158000	1	1	1	0	0	0	0	0	0
158100	1	1	1	0	0	0	0	0	0
158200	1	1	1	0	0	0	0	0	0
158300	1	1	1	0	0	0	0	0	0
158400	1	1	1	0	0	0	0	0	0
158500	1	1	1	0	0	0	0	0	0
158600	1	1	1	0	0	0	0	0	0
158700	1	1	1	0	0	0	0	0	0
158800	1	1	1	0	0	0	0	0	0
158900	1	1	1	0	0	0	0	0	0
159000	1	1	1	0	0	0	0	0	0
159100	1	1	1	0	0	0	0	0	0
159200	1	1	1	0	0	0	0	0	0
159300	1	1	1	0	0	0	0	0	0
159400	1	1	1	0	0	0	0	0	0
159500	1	1	1	0	0	0	0	0	0
159600	1	1	1	0	0	0	0	0	0
159700	1	1	1	0	0	0	0	0	0
159800	1	1	1	0	0	0	0	0	0
159900	1	1	1	0	0	0	0	0	0
160000	1	1	1	0	0	0	0	0	0
160100	1	1	1	0	0	0	0	0	0
160200	1	1	1	0	0	0	0	0	0
160300	1	1	1	0	0	0	0	0	0
160400	1	1	1	0	0	0	0	0	0
160500	1	1	1	0	0	0	0	0	0
160600	1	1	1	0	0	0	0	0	0
160700	1	1	1	0	0	0	0	0	0
160800	1	1	1	0	0	0	0	0	0
160900	1	1	1	0	0	0	0	0	0
161000	1	1	1	0	0	0	0	0	0
161100	1	1	1	0	0	0	0	0	0
161200	1	1	1	0	0	0	0	0	0
161300	1	1	1	0	0	0	0	0	0
161400	1	1	1	0	0	0	0	0	0
161500	1	1	1	0	0	0	0	0	0
161600	1	1	1	0	0	0	0	0	0
161700	1	1	1	0	0	0	0	0	0
161800	1	1	1	0	0	0	0	0	0
161900	1	1	1	0	0	0	0	0	0
162000	1	1	1	0	0	0	0	0	0
162100	1	1	1	0	0	0	0	0	0
162200	1	1	1	0	0	0	0	0	0
162300	1	1	1	0	0	0	0	0	0
162400	1	1	1	0	0	0	0	0	0
162500	1	1	1	0	0	0	0	0	0
162600	1	1	1	0	0	0	0	0	0
162700	1	1	1	0	0	0	0	0	0
162800	1	1	1	0	0	0	0	0	0
162900	1	1	1	0	0	0	0	0	0
163000	1	1	1	0	0	0	0	0	0
163100	1	1	1	0	0	0	0	0	0
163200	1	1	1	0	0	0	0	0	0
163300	1	1	1	0	0	0	0	0	0
163400	1	1	1	0	0	0	0	0	0
163500	1	1	1	0	0	0	0	0	0
163600	1	1	1	0	0	0	0	0	0
163700	1	1	1	0	0	0	0	0	0
163800	1	1	1	0	0	0	0	0	0
163900	1	1	1	0	0	0	0	0	0
164000	1	1	1	0	0	0	0	0	0
164100	1	1	1	0	0	0	0	0	0
164200	1	1	1	0	0	0	0	0	0
164300	1	1	1	0	0	0	0	0	0
164400	1	1	1	0	0	0	0	0	0
164500	1	1	1	0	0	0	0	0	0
164600	1	1	1	0	0	0	0	0	0
164700	1	1	1	0	0	0	0	0	0
164800	1	1	1	0	0	0	0	0	0
164900	1	1	1	0	0	0	0	0	0
165000	1	1	1	0	0	0	0	0	0
165100	1	1	1	0	0	0	0	0	0
165200	1	1	1	0	0	0	0	0	0
165300	1	1	1	0	0	0	0	0	0
165400	1	1	1	0	0	0	0	0	0
165500	1	1	1	0	0	0	0	0	0
165600	1	1	1	0	0	0	0	0	0
165700	1	1	1	0	0	0	0	0	0
165800	1	1	1	0	0	0	0	0	0
165900	1	1	1	0	0	0	0	0	0
166000	1	1	1	0	0	0	0	0	0
166100	1	1	1	0	0	0	0	0	0
166200	1	1	1	0	0	0	0	0	0
166300	1	1	1	0	0	0	0	0	0
166400	1	1	1	0	0	0	0	0	0
166500	1	1	1	0	0	0	0	0	0
166600	1	1	1	0	0	0	0	0	0
166700	1	1	1	0	0	0	0	0	0
166800	1	1	1	0	0	0	0	0	0
166900	1	1	1	0	0	0	0	0	0
167000	1	1	1	0	0	0	0	0	0
167100	1	1	1	0	0	0	0	0	0
167200	1	1	1	0	0	0	0	0	0
167300	1	1	1	0	0	0	0	0	0
167400	1	1	1	0	0	0	0	0	0
167500	1	1	1	0	0	0	0	0	0
167600	1	1	1	0	0	0	0	0	0
167700	1	1	1	0	0	0	0	0	0
167800	1	1	1	0	0	0	0	0	0
167900	1	1	1	0	0	0	0	0	0
168000	1	1	1	0	0	0	0	0	0
168100	1	1	1	0	0	0	0	0	0
168200	1	1	1	0	0	0	0	0	0
168300	1	1	1	0	0	0	0	0	0
168400	1	1	1	0	0	0	0	0	0
168500	1	1	1	0	0	0	0	0	0
168600	1	1	1	0	0	0	0	0	0
168700	1	1	1	0	0	0	0	0	0
168800	1	1	1	0	0	0	0	0	0
168900	1	1	1	0	0	0	0	0	0
169000	1	1	1	0	0	0	0	0	0
169100	1	1	1	0	0	0	0	0	0
169200	1	1	1	0	0	0	0	0	0
169300	1	1	1	0	0	0	0	0	0
169400	1	1	1	0	0	0	0	0	0
169500	1	1	1	0	0	0	0	0	0
169600	1	1	1	0	0	0	0	0	0
169700	1	1	1	0	0	0	0	0	0
169800	1	1	1	0	0	0	0	0	0
169900	1	1	1	0	0	0	0	0	0
170000	1	1	1	0	0	0	0	0	0
170100	1	1	1	0	0	0	0	0	0
170200	1	1	1	0	0	0	0	0	0
170300	1	1	1	0	0	0	0	0	0
170400	1	1	1	0	0	0	0	0	0
170500	1	1	1	0	0	0	0	0	0
170600	1	1	1	0	0	0	0	0	0
170700	1	1	1	0	0	0	0	0	0
170800	1	1	1	0	0	0	0	0	0
170900	1	1	1	0	0	0	0	0	0
171000	1	1	1	0	0	0	0	0	0
171100	1	1	1	0	0	0	0	0	0
171200	1	1	1	0	0	0	0	0	0
171300	1	1	1	0	0	0	0	0	0
171400	1	1	1	0	0	0	0	0	0
171500	1	1	1	0	0	0	0	0	0
171600	1	1	1	0	0	0	0	0	0
171700	1	1	1	0	0	0	0	0	0
171800	1	1	1	0	0	0	0	0	0
171900	1	1	1	0	0	0	0	0	0
172000	1	1	1	0	0	0	0	0	0
172100	1	1	1	0	0	0	0	0	0
172200	1	1	1	0	0	0	0	0	0
172300	1	1	1	0	0	0	0	0	0
172400	1	1	1	0	0	0	0	0	0
172500	1	1	1	0	0	0	0	0	0
172600	1	1	1	0	0	0	0	0	0
172700	1	1	1	0	0	0	0	0	0
172800	1	1	1	0	0	0	0	0	0
172900	1	1	1	0	0	0	0	0	0
173000	1	1	1	0	0	0	0	0	0
173100	1	1	1	0	0	0	0	0	0
173200	1	1	1	0	0	0	0	0	0
173300	1	1	1	0	0	0	0	0	0
173400	1	1	1	0	0	0	0	0	0
173500	1	1	1	0	0	0	0	0	0
173600	1	1	1	0	0	0	0	0	0
173700	1	1	1	0	0	0	0	0	0
173800	1	1	1	0	0	0	0	0	0
173900	1	1	1	0	0	0	0	0	0
174000	1	1	1	0	0	0	0	0	0
174100	1	1	1	0	0	0	0	0	0
174200	1	1	1	0	0	0	0	0	0
174300	1	1	1	0	0	0	0	0	0
174400	1	1	1	0	0	0	0	0	0
174500	1	1	1	0	0	0	0	0	0
174600	1	1	1	0	0	0	0	0	0
174700	1	1	1	0	0	0	0	0	0
174800	1	1	1	0	0	0	0	0	0
174900	1	1	1	0	0	0	0	0	0
175000	1	1	1	0	0	0	0	0	0
175100	1	1	1	0	0	0	0	0	0
175200	1	1	1	0	0	0	0	0	0
175300	1	1	1	0	0	0	0	0	0
175400	1	1	1	0	0	0	0	0	0
175500	1	1	1	0	0	0	0	0	0
175600	1	1	1	0	0	0	0	0	0
175700	1	1	1	0	0	0	0	0	0
175800	1	1	1	0	0	0	0	0	0
175900	1	1	1	0	0	0	0	0	0
176000	1	1	1	0	0	0	0	0	0
176100	1	1	1	0	0	0	0	0	0
176200	1	1	1	0	0	0	0	0	0
176300	1	1	1	0	0	0	0	0	0
176400	1	1	1	0	0	0	0	0	0
176500	1	1	1	0	0	0	0	0	0
176600	1	1	1	0	0	0	0	0	0
176700	1	1	1	0	0	0	0	0	0
176800	1	1	1	0	0	0	0	0	0
176900	1	1	1	0	0	0	0	0	0
177000	1	1	1	0	0	0	0	0	0
177100	1	1	1	0	0	0	0	0	0
177200	1	1	1	0	0	0	0	0	0
177300	1	1	1	0	0	0	0	0	0
177400	1	1	1	0	0	0	0	0	0
177500	1	1	1	0	0	0	0	0	0
177600	1	1	1	0	0	0	0	0	0
177700	1	1	1	0	0	0	0	0	0
177800	1	1	1	0	0	0	0	0	0
177900	1	1	1	0	0	0	0	0	0
178000	1	1	1	0	0	0	0	0	0
178100	1	1	1	0	0	0	0	0	0
178200	1	1	1	0	0	0	0	0	0
178300	1	1	1	0	0	0	0	0	0
178400	1	1	1	0	0	0	0	0	0
178500	1	1	1	0	0	0	0	0	0
178600	1	1	1	0	0	0	0	0	0
178700	1	1	1	0	0	0	0	0	0
178800	1	1	1	0	0	0	0	0	0
178900	1	1	1	0	0	0	0	0	0
179000	1	1	1	0	0	0	0	0	0
179100	1	1	1	0	0	0	0	0	0
179200	1	1	1	0	0	0	0	0	0
179300	1	1	1	0	0	0	0	0	0
179400	1	1	1	0	0	0	0	0	0
179500	1	1	1	0	0	0	0	0	0
179600	1	1	1	0	0	0	0	0	0
179700	1	1	1	0	0	0	0	0	0
179800	1	1	1	0	0	0	0	0	0
179900	1	1	1	0	0	0	0	0	0
180000	1	1	1	0	0	0	0	0	0
180100	1	1	1	0	0	0	0	0	0
180200	1	1	1	0	0	0	0	0	0
180300	1	1	1	0	0	0	0	0	0
180400	1	1	1	0	0	0	0	0	0
180500	1	1	1	0	0	0	0	0	0
180600	1	1	1	0	0	0	0	0	0
180700	1	1	1	0	0	0	0	0	0
180800	1	1	1	0	0	0	0	0	0
180900	1	1	1	0	0	0	0	0	0
181000	1	1	1	0	0	0	0	0	0
181100	1	1	1	0	0	0	0	0	0
181200	1	1	1	0	0	0	0	0	0
181300	1	1	1	0	0	0	0	0	0
181400	1	1	1	0	0	0	0	0	0
181500	1	1	1	0	0	0	0	0	0
181600	1	1	1	0	0	0	0	0	0
181700	1	1	1	0	0	0	0	0	0
181800	1	1	1	0	0	0	0	0	0
181900	1	1	1	0	0	0	0	0	0
182000	1	1	1	0	0	0	0	0	0
182100	1	1	1	0	0	0	0	0	0
182200	1	1	1	0	0	0	0	0	0
182300	1	1	1	0	0	0	0	0	0
182400	1	1	1	0	0	0	0	0	0
182500	1	1	1	0	0	0	0	0	0
182600	1	1	1	0	0	0	0	0	0
182700	1	1	1	0	0	0	0	0	0
182800	1	1	1	0	0	0	0	0	0
182900	1	1	1	0	0	0	0	0	0
183000	1	1	1	0	0	0	0	0	0
183100	1	1	1	0	0	0	0	0	0
183200	1	1	1	0	0	0	0	0	0
183300	1	1	1	0	0	0	0	0	0
183400	1	1	1	0	0	0	0	0	0
183500	1	1	1	0	0	0	0	0	0
183600	1	1	1	0	0	0	0	0	0
183700	1	1	1	0	0	0	0	0	0
183800	1	1	1	0	0	0	0	0	0
183900	1	1	1	0	0	0	0	0	0
184000	1	1	1	0	0	0	0	0	0
184100	1	1	1	0	0	0	0	0	0
184200	1	1	1	0	0	0	0	0	0
184300	1	1	1	0	0	0	0	0	0
184400	1	1	1	0	0	0	0	0	0
184500	1	1	1	0	0	0	0	0	0
184600	1	1	1	0	0	0	0	0	0
184700	1	1	1	0	0	0	0	0	0
184800	1	1	1	0	0	0	0	0	0
184900	1	1	1	0	0	0	0	0	0
185000	1	1	1	0	0	0	0	0	0
185100	1	1	1	0	0	0	0	0	0
185200	1	1	1	0	0	0	0	0	0
185300	1	1	1	0	0	0	0	0	0
185400	1	1	1	0	0	0	0	0	0
185500	1	1	1	0	0	0	0	0	0
185600	1	1	1	0	0	0	0	0	0
185700	1	1	1	0	0	0	0	0	0
185800	1	1	1	0	0	0	0	0	0
185900	1	1	1	0	0	0	0	0	0
186000	1	1	1	0	0	0	0	0	0
186100	1	1	1	0	0	0	0	0	0
186200	1	1	1	0	0	0	0	0	0
186300	1	1	1	0	0	0	0	0	0
186400	1	1	1	0	0	0	0	0	0
186500	1	1	1	0	0	0	0	0	0
186600	1	1	1	0	0	0	0	0	0
186700	1	1	1	0	0	0	0	0	0
186800	1	1	1	0	0	0	0	0	0
186900	1	1	1	0	0	0	0	0	0
187000	1	1	1	0	0	0	0	0	0
187100	1	1	1	0	0	0	0	0	0
187200	1	1	1	0	0	0	0	0	0
187300	1	1	1	0	0	0	0	0	0
187400	1	1	1	0	0	0	0	0	0
187500	1	1	1	0	0	0	0	0	0
187600	1	1	1	0	0	0	0	0	0
187700	1	1	1	0	0	0	0	0	0
187800	1	1	1	0	0	0	0	0	0
187900	1	1	1	0	0	0	0	0	0
188000	1	1	1	0	0	0	0	0	0
188100	1	1	1	0	0	0	0	0	0
188200	1	1	1	0	0	0	0	0	0
188300	1	1	1	0	0	0	0	0	0
188400	1	1	1	0	0	0	0	0	0
188500	1	1	1	0	0	0	0	0	0
188600	1	1	1	0	0	0	0	0	0
188700	1	1	1	0	0	0	0	0	0
188800	1	1	1	0	0	0	0	0	0
188900	1	1	1	0	0	0	0	0	0
189000	1	1	1	0	0	0	0	0	0
189100	1	1	1	0	0	0	0	0	0
189200	1	1	1	0	0	0	0	0	0
189300	1	1	1	0	0	0	0	0	0
189400	1	1	1	0	0	0	0	0	0
189500	1	1	1	0	0	0	0	0	0
189600	1	1	1	0	0	0	0	0	0
189700	1	1	1	0	0	0	0	0	0
189800	1	1	1	0	0	0	0	0	0
189900	1	1	1	0	0	0	0	0	0
190000	1	1	1	0	0	0	0	0	0
190100	1	1	1	0	0	0	0	0	0
190200	1	1	1	0	0	0	0	0	0
190300	1	1	1	0	0	0	0	0	0
190400	1	1	1	0	0	0	0	0	0
190500	1	1	1	0	0	0	0	0	0
190600	1	1	1	0	0	0	0	0	0
190700	1	1	1	0	0	0	0	0	0
190800	1	1	1	0	0	0	0	0	0
190900	1	1	1	0	0	0	0	0	0
191000	1	1	1	0	0	0	0	0	0
191100	1	1	1	0	0	0	0	0	0
191200	1	1	1	0	0	0	0	0	0
191300	1	1	1	0	0	0	0	0	0
191400	1	1	1	0	0	0	0	0	0
191500	1	1	1	0	0	0	0	0	0
191600	1	1	1	0	0	0	0	0	0
191700	1	1	1	0	0	0	0	0	0
191800	1	1	1	0	0	0	0	0	0
191900	1	1	1	0	0	0	0	0	0
192000	1	1	1	0	0	0	0	0	0
192100	1	1	1	0	0	0	0	0	0
192200	1	1	1	0	0	0	0	0	0
192300	1	1	1	0	0	0	0	0	0
192400	1	1	1	0	0	0	0	0	0
192500	1	1	1	0	0	0	0	0	0
192600	1	1	1	0	0	0	0	0	0
192700	1	1	1	0	0	0	0	0	0
192800	1	1	1	0	0	0	0	0	0
192900	1	1	1	0	0	0	0	0	0
193000	1	1	1	0	0	0	0	0	0
193100	1	1	1	0	0	0	0	0	0
193200	1	1	1	0	0	0	0	0	0
193300	1	1	1	0	0	0	0	0	0
193400	1	1	1	0	0	0	0	0	0
193500	1	1	1	0	0	0	0	0	0
193600	1	1	1	0	0	0	0	0	0
193700	1	1	1	0	0	0	0	0	0
193800	1	1	1	0	0	0	0	0	0
193900	1	1	1	0	0	0	0	0	0
194000	1	1	1	0	0	0	0	0	0
194100	1	1	1	0	0	0	0	0	0
194200	1	1	1	0	0	0	0	0	0
194300	1	1	1	0	0	0	0	0	0
194400	1	1	1	0	0	0	0	0	0
194500	1	1	1	0	0	0	0	0	0
194600	1	1	1	0	0	0	0	0	0
194700	1	1	1	0	0	0	0	0	0
194800	1	1	1	0	0	0	0	0	0
194900	1	1	1	0	0	0	0	0	0
195000	1	1	1	0	0	0	0	0	0
195100	1	1	1	0	0	0	0	0	0
195200	1	1	1	0	0	0	0	0	0
195300	1	1	1	0	0	0	0	0	0
195400	1	1	1	0	0	0	0	0	0
195500	1	1	1	0	0	0	0	0	0
195600	1	1	1	0	0	0	0	0	0
195700	1	1	1	0	0	0	0	0	0
195800	1	1	1	0	0	0	0	0	0
195900	1	1	1	0	0	0	0	0	0
196000	1	1	1	0	0	0	0	0	0
196100	1	1	1	0	0	0	0	0	0
196200	1	1	1	0	0	0	0	0	0
196300	1	1	1	0	0	0	0	0	0
196400	1	1	1	0	0	0	0	0	0
196500	1	1	1	0	0	0	0	0	0
196600	1	1	1	0	0	0	0	0	0
196700	1	1	1	0	0	0	0	0	0
196800	1	1	1	0	0	0	0	0	0
196900	1	1	1	0	0	0	0	0	0
197000	1	1	1	0	0	0	0	0	0
197100	1	1	1	0	0	0	0	0	0
197200	1	1	1	0	0	0	0	0	0
197300	1	1	1	0	0	0	0	0	0
197400	1	1	1	0	0	0	0	0	0
197500	1	1	1	0	0	0	0	0	0
197600	1	1	1	0	0	0	0	0	0
197700	1	1	1	0	0	0	0	0	0
197800	1	1	1	0	0	0	0	0	0
197900	1	1	1	0	0	0	0	0	0
198000	1	1	1	0	0	0	0	0	0
198100	1	1	1	0	0	0	0	0	0
198200	1	1	1	0	0	0	0	0	0
198300	1	1	1	0	0	0	0	0	0
198400	1	1	1	0	0	0	0	0	0
198500	1	1	1	0	0	0	0	0	0
198600	1	1	1	0	0	0	0	0	0
198700	1	1	1	0	0	0	0	0	0
198800	1	1	1	0	0	0	0	0	0
198900	1	1	1	0	0	0	0	0	0
199000	1	1	1	0	0	0	0	0	0
199100	1	1	1	0	0	0	0	0	0
199200	1	1	1	0	0	0	0	0	0
199300	1	1	1	0	0	0	0	0	0
199400	1	1	1	0	0	0	0	0	0
199500	1	1	1	0	0	0	0	0	0
199600	1	1	1	0	0	0	0	0	0
199700	1	1	1	0	0	0	0	0	0
199800	1	1	1	0	0	0	0	0	0
199900	1	1	1	0	0	0	0	0	0
[truncated: 1 more rows]
