# Supplementary material
Source: ML conference proceedings conference paper supplement (https://openreview.net/forum?id=Lb8ZnWW_In6)
Supplement: supplementary_material [file craft_all.xlsx]

## Sheet: t1
0	0	0	0	0	0	0	0	0	0
400	0	0	0	0	0	0	0	0	0
800	0	0	0	0	0	0	0	0	0
1200	0	0	0	0	0	0	0	0	0
1600	0	0	0	0	0	0	0	0	0
2000	0	0	0	0	0	0	0	0	0
2400	0	0	0	0	0	0	0	0	0
2800	0	0	0	0	0	0	0	0	0
3200	0	0	0	0	0	0	0	0	0
3600	0	0	0	0	0	0.0833333	0	0	0
4000	0	0	0	0	0	0.075	0	0	0
4400	0	0	0	0	0	0.075	0	0	0
4800	0	0	0	0	0	0.075	0	0	0
5200	0	0	0	0	0	0.075	0	0	0
5600	0	0	0	0	0	0.075	0	0	0
6000	0	0	0	0	0	0.075	0	0	0
6400	0	0	0	0	0	0.075	0	0	0
6800	0	0	0	0	0	0.075	0	0	0
7200	0	0	0	0	0	0.075	0	0	0
7600	0	0	0	0	0	0	0	0	0
8000	0	0	0	0	0	0	0	0	0
8400	0	0	0	0	0	0	0	0	0
8800	0	0	0	0	0	0.075	0	0	0
9200	0	0	0	0	0	0.075	0	0	0
9600	0	0	0	0	0	0.075	0	0	0
10000	0	0	0	0	0	0.075	0	0	0
10400	0	0	0	0	0	0.075	0	0	0
10800	0	0	0	0	0	0.075	0	0	0
11200	0	0	0	0	0	0.175	0	0	0
11600	0	0	0	0	0	0.175	0	0	0
12000	0	0	0	0	0	0.25	0	0	0
12400	0	0	0	0	0	0.325	0	0.05	0.1
12800	0	0	0	0	0	0.25	0	0.05	0.1
13200	0	0	0	0	0	0.25	0	0.05	0.1
13600	0	0	0	0	0	0.25	0	0.05	0.1
14000	0	0	0	0	0	0.325	0	0.05	0.1
14400	0	0	0	0	0	0.325	0	0.05	0.1
14800	0	0	0	0	0	0.4	0	0.05	0.1
15200	0	0	0	0	0	0.3	0	0.05	0.2
15600	0	0	0	0	0	0.3	0	0.05	0.3
16000	0	0	0	0	0	0.225	0	0.05	0.3
16400	0	0	0	0	0	0.225	0	0	0.2
16800	0	0	0	0	0	0.225	0	0	0.2
17200	0	0	0	0	0	0.3	0	0	0.2
17600	0	0	0	0	0	0.3	0	0	0.2
18000	0	0	0	0	0	0.225	0	0	0.275
18400	0	0	0	0	0	0.3	0	0	0.375
18800	0	0	0	0	0	0.225	0	0	0.475
19200	0	0	0	0	0	0.225	0	0	0.375
19600	0	0	0	0	0	0.225	0	0	0.275
20000	0	0	0	0	0	0.225	0	0	0.375
20400	0	0	0	0	0	0.15	0	0	0.375
20800	0	0	0	0	0	0.25	0	0	0.375
21200	0	0	0	0	0	0.175	0	0	0.375
21600	0	0	0	0	0	0.175	0	0	0.375
22000	0	0	0	0	0	0.25	0	0	0.3
22400	0	0	0	0	0	0.25	0	0	0.2
22800	0	0	0	0	0	0.325	0	0	0.1
23200	0	0	0	0	0	0.325	0	0	0.175
23600	0	0	0	0	0	0.4	0	0.05	0.275
24000	0	0	0	0	0	0.4	0	0.05	0.275
24400	0	0	0	0	0	0.4	0	0.05	0.275
24800	0	0	0	0	0	0.3	0	0.05	0.275
25200	0	0	0	0	0	0.3	0	0.05	0.275
25600	0	0	0	0	0	0.3	0	0.05	0.275
26000	0	0	0	0	0	0.225	0	0.1	0.375
26400	0	0	0	0	0	0.15	0	0.1	0.45
26800	0	0	0	0	0	0.075	0	0.1	0.45
27200	0	0	0	0	0	0.075	0	0.1	0.475
27600	0	0	0	0	0	0.075	0	0.05	0.475
28000	0	0	0	0	0	0.075	0	0.05	0.375
28400	0	0	0	0	0	0.075	0	0.05	0.375
28800	0	0	0	0	0	0.075	0	0.15	0.475
29200	0	0	0	0	0	0.15	0	0.15	0.475
29600	0	0	0	0	0	0.15	0	0.15	0.475
30000	0	0	0	0	0	0.15	0	0.1	0.475
30400	0	0	0	0	0	0.25	0	0.1	0.5
30800	0	0	0	0	0	0.25	0	0.1	0.5
31200	0	0	0	0	0	0.25	0	0.1	0.5
31600	0	0	0	0	0	0.175	0	0.15	0.5
32000	0	0	0	0	0	0.175	0	0.15	0.6
32400	0	0	0	0	0	0.175	0	0.15	0.675
32800	0	0	0	0	0	0.25	0	0.05	0.65
33200	0	0	0	0	0	0.175	0	0.05	0.725
33600	0	0	0	0	0	0.25	0	0.05	0.8
34000	0	0	0	0	0	0.25	0	0.05	0.7
34400	0	0	0	0	0	0.15	0	0.05	0.7
34800	0	0	0	0	0	0.15	0	0.05	0.7
35200	0	0	0	0	0	0.15	0	0.05	0.6
35600	0	0	0	0	0	0.15	0	0	0.5
36000	0	0	0	0	0	0.25	0	0.05	0.5
36400	0	0	0	0	0	0.25	0	0.05	0.5
36800	0	0	0	0	0	0.25	0	0.05	0.425
37200	0	0	0	0	0	0.25	0	0.05	0.425
37600	0	0	0	0	0	0.175	0	0.05	0.425
38000	0	0	0	0	0	0.175	0	0.05	0.525
38400	0	0	0	0	0	0.275	0	0.05	0.525
38800	0	0	0	0	0	0.275	0	0.05	0.6
39200	0	0	0	0	0	0.275	0	0.05	0.675
39600	0	0	0	0	0	0.275	0	0.05	0.675
40000	0	0	0	0	0	0.175	0	0	0.575
40400	0	0	0	0	0	0.25	0	0.05	0.6
40800	0	0	0	0	0	0.25	0	0.05	0.7
41200	0	0	0	0	0	0.325	0	0.1	0.725
41600	0	0	0	0	0	0.4	0	0.1	0.725
42000	0	0	0.075	0	0	0.5	0	0.1	0.7
42400	0	0	0.075	0	0	0.5	0	0.1	0.7
42800	0	0	0.15	0	0	0.6	0	0.2	0.725
43200	0	0	0.15	0	0	0.6	0	0.2	0.65
43600	0	0	0.15	0	0	0.6	0	0.2	0.75
44000	0	0	0.15	0	0.05	0.7	0	0.2	0.85
44400	0	0	0.15	0	0.05	0.7	0	0.15	0.75
44800	0	0	0.15	0	0.05	0.625	0	0.15	0.75
45200	0	0	0.15	0	0.05	0.65	0	0.1	0.725
45600	0	0	0.225	0	0.05	0.575	0	0.1	0.725
46000	0	0	0.15	0	0.05	0.475	0	0.1	0.65
46400	0	0	0.15	0	0.05	0.375	0	0.1	0.65
46800	0	0	0.075	0	0.05	0.275	0	0.05	0.65
47200	0	0	0.075	0	0.05	0.35	0	0.05	0.75
47600	0	0	0.15	0	0.05	0.35	0	0.05	0.65
48000	0	0	0.225	0	0	0.25	0	0.05	0.625
48400	0	0	0.225	0	0	0.175	0	0.05	0.7
48800	0	0	0.225	0	0	0.25	0	0.05	0.675
49200	0	0	0.225	0	0	0.25	0	0.05	0.6
49600	0	0	0.15	0	0	0.325	0	0.05	0.6
50000	0	0	0.225	0	0.05	0.425	0	0.05	0.6
50400	0	0	0.325	0	0.05	0.425	0	0.05	0.5
50800	0	0	0.325	0	0.05	0.425	0	0	0.4
51200	0	0	0.325	0	0.05	0.35	0	0	0.3
51600	0	0	0.25	0	0.05	0.35	0	0	0.3
52000	0	0	0.25	0	0.05	0.35	0	0	0.3
52400	0	0	0.325	0	0.05	0.45	0	0	0.225
52800	0	0	0.325	0	0.05	0.375	0	0	0.15
53200	0	0	0.425	0	0.05	0.375	0	0	0.15
53600	0	0	0.425	0	0.05	0.3	0	0	0.075
54000	0	0	0.35	0	0	0.2	0	0	0.15
54400	0	0	0.325	0	0	0.2	0	0	0.225
54800	0	0	0.325	0	0	0.2	0	0.1	0.325
55200	0	0	0.4	0	0	0.2	0	0.1	0.4
55600	0	0	0.475	0	0	0.275	0	0.1	0.5
56000	0	0	0.5	0	0	0.275	0	0.2	0.525
56400	0	0	0.525	0	0	0.175	0	0.2	0.625
56800	0	0	0.625	0	0	0.25	0	0.2	0.725
57200	0	0	0.625	0	0	0.225	0	0.2	0.725
57600	0	0	0.725	0	0	0.225	0	0.2	0.725
58000	0	0	0.825	0	0	0.3	0	0.3	0.75
58400	0	0	0.825	0	0	0.3	0	0.3	0.75
58800	0	0	0.9	0	0	0.3	0	0.2	0.65
59200	0	0.05	0.925	0	0	0.375	0	0.2	0.575
59600	0	0.1	0.95	0	0	0.375	0	0.2	0.475
60000	0	0.15	0.95	0	0	0.375	0	0.1	0.375
60400	0	0.2	0.95	0	0	0.375	0	0.1	0.35
60800	0	0.25	0.95	0	0	0.375	0	0.1	0.325
61200	0	0.25	0.95	0	0	0.3	0	0.1	0.425
61600	0	0.25	0.95	0	0	0.375	0	0.15	0.525
62000	0	0.25	0.95	0	0	0.375	0	0.05	0.525
62400	0	0.25	0.975	0	0	0.45	0	0.05	0.525
62800	0	0.25	1	0	0	0.525	0	0.05	0.525
63200	0	0.3	1	0	0	0.45	0.1	0.15	0.625
63600	0	0.3	1	0	0	0.475	0.1	0.15	0.625
64000	0	0.3	1	0	0	0.55	0.1	0.15	0.7
64400	0	0.25	1	0	0	0.55	0.1	0.15	0.725
64800	0	0.2	0.9	0	0	0.475	0.1	0.2	0.75
65200	0	0.25	0.9	0	0	0.575	0.1	0.3	0.75
65600	0	0.3	0.9	0	0	0.575	0.1	0.25	0.65
66000	0	0.35	0.9	0	0	0.5	0.1	0.25	0.65
66400	0	0.4	0.9	0	0	0.525	0.1	0.25	0.575
66800	0	0.5	0.9	0	0	0.45	0.1	0.3	0.675
67200	0	0.45	0.9	0	0	0.45	0	0.2	0.65
67600	0	0.5	0.9	0	0	0.35	0	0.2	0.75
68000	0	0.55	0.9	0	0	0.35	0	0.2	0.75
68400	0	0.65	0.9	0	0	0.35	0	0.2	0.65
68800	0	0.7	1	0	0	0.35	0	0.15	0.65
69200	0	0.75	1	0	0	0.325	0	0.05	0.65
69600	0	0.75	1	0	0	0.25	0	0.1	0.75
70000	0	0.8	1	0	0	0.25	0	0.1	0.65
70400	0.1	0.85	1	0	0	0.15	0	0.1	0.75
70800	0.1	0.8	1	0	0	0.15	0	0.05	0.65
71200	0.125	0.85	1	0	0	0.225	0	0.05	0.65
71600	0.125	0.85	1	0	0	0.3	0	0.05	0.625
72000	0.225	0.85	1	0	0	0.225	0	0.05	0.55
72400	0.325	0.85	1	0	0	0.225	0	0.05	0.625
72800	0.325	0.85	1	0	0.1	0.325	0	0.05	0.6
73200	0.325	0.85	1	0	0.1	0.325	0	0.05	0.6
73600	0.425	0.9	1	0	0.1	0.325	0	0.05	0.6
74000	0.525	0.9	1	0	0.1	0.325	0	0.05	0.7
74400	0.45	0.9	1	0	0.1	0.4	0	0.05	0.6
74800	0.45	0.9	1	0	0.1	0.4	0	0.1	0.7
75200	0.525	0.9	1	0	0.1	0.4	0	0.15	0.725
75600	0.625	0.9	1	0	0.1	0.325	0	0.15	0.65
76000	0.55	0.9	1	0	0.15	0.425	0	0.15	0.65
76400	0.55	0.9	1	0	0.15	0.5	0	0.15	0.675
76800	0.65	0.95	1	0	0.05	0.4	0	0.15	0.675
77200	0.65	0.95	1	0	0.05	0.325	0	0.15	0.575
77600	0.575	0.95	1	0	0.05	0.325	0	0.1	0.475
78000	0.575	0.95	1	0	0.05	0.325	0	0.1	0.45
78400	0.575	0.95	1	0	0.05	0.25	0	0.1	0.45
78800	0.6	1	1	0	0.05	0.25	0	0.05	0.35
79200	0.525	1	1	0	0.05	0.175	0	0	0.325
79600	0.525	1	1	0	0.05	0.175	0	0	0.325
80000	0.6	1	1	0	0	0.175	0	0	0.325
80400	0.6	1	1	0	0	0.2	0	0	0.225
80800	0.525	1	1	0	0	0.2	0	0	0.225
81200	0.525	1	1	0	0	0.2	0	0	0.3
81600	0.6	1	1	0	0	0.2	0	0.1	0.4
82000	0.6	1	1	0	0	0.2	0	0.1	0.325
82400	0.675	1	1	0	0	0.275	0	0.1	0.325
82800	0.75	1	1	0	0.1	0.375	0	0.1	0.4
83200	0.825	1	1	0	0.1	0.375	0	0.15	0.425
83600	0.825	1	1	0	0.1	0.375	0	0.15	0.5
84000	0.825	1	1	0	0.1	0.275	0	0.15	0.6
84400	0.825	1	1	0	0.1	0.175	0	0.15	0.6
84800	0.9	1	1	0	0.1	0.175	0	0.15	0.525
85200	1	1	1	0	0.1	0.175	0	0.15	0.45
85600	1	1	1	0	0.1	0.175	0	0.15	0.45
86000	1	1	1	0	0.1	0.175	0	0.15	0.45
86400	1	1	1	0	0.1	0.2	0	0.15	0.45
86800	1	1	1	0	0	0.1	0	0.15	0.375
87200	1	1	1	0	0	0.1	0	0.1	0.275
87600	1	1	1	0	0	0.1	0	0.1	0.275
88000	1	1	1	0	0	0.175	0	0.1	0.275
88400	1	1	1	0	0	0.25	0	0.1	0.275
88800	1	1	1	0	0	0.25	0	0.1	0.275
89200	1	1	1	0	0	0.325	0	0.1	0.35
89600	1	1	1	0	0	0.325	0	0	0.325
90000	1	1	1	0	0	0.425	0	0	0.325
90400	1	1	1	0	0	0.425	0	0	0.4
90800	0.925	1	1	0	0	0.5	0	0	0.4
91200	0.925	1	1	0	0.1	0.6	0	0.05	0.5
91600	0.925	1	1	0	0.1	0.6	0	0.05	0.5
92000	0.925	1	1	0	0.1	0.525	0	0.1	0.5
92400	0.925	1	1	0	0.1	0.45	0	0.15	0.6
92800	0.925	1	1	0	0.1	0.55	0	0.15	0.675
93200	0.925	1	1	0	0.1	0.475	0	0.2	0.7
93600	0.925	1	1	0	0.1	0.475	0	0.2	0.625
94000	0.925	1	1	0	0.1	0.375	0.025	0.3	0.725
94400	0.925	1	1	0	0.1	0.275	0.025	0.3	0.65
94800	1	1	1	0	0.1	0.2	0.025	0.4	0.75
95200	1	1	1	0	0	0.1	0.025	0.35	0.725
95600	1	1	1	0	0	0.175	0.025	0.35	0.65
96000	1	1	1	0	0	0.175	0.025	0.3	0.55
96400	1	1	1	0	0	0.275	0.025	0.25	0.525
96800	1	1	1	0	0	0.25	0.025	0.25	0.55
97200	1	1	1	0	0	0.35	0.025	0.2	0.55
97600	1	1	1	0	0	0.425	0.025	0.2	0.55
98000	1	1	1	0	0	0.425	0	0.1	0.45
98400	0.925	1	1	0	0	0.425	0	0.1	0.525
98800	0.925	1	1	0	0	0.425	0	0	0.425
99200	0.925	1	1	0	0	0.425	0	0.05	0.45
99600	0.925	1	1	0	0	0.45	0	0.05	0.45
100000	0.925	1	1	0	0	0.45	0	0.05	0.525
100400	0.925	1	1	0	0	0.425	0	0.05	0.45
100800	0.925	1	1	0	0	0.35	0	0.15	0.45
101200	0.925	1	1	0	0	0.325	0	0.15	0.45
101600	0.925	1	1	0	0	0.325	0	0.15	0.525
102000	0.925	1	1	0	0	0.325	0	0.25	0.625
102400	1	1	1	0	0	0.325	0	0.25	0.65
102800	1	1	1	0	0	0.4	0	0.25	0.65
103200	1	1	1	0	0	0.4	0	0.2	0.55
103600	1	1	1	0	0	0.3	0	0.2	0.65
104000	1	1	1	0	0	0.375	0	0.25	0.675
104400	1	1	1	0	0	0.3	0	0.25	0.75
104800	1	1	1	0	0	0.3	0	0.15	0.65
105200	1	1	1	0	0	0.3	0	0.15	0.625
105600	1	1	1	0	0	0.225	0	0.15	0.55
106000	1	1	1	0	0	0.3	0	0.05	0.525
106400	1	1	1	0	0	0.3	0	0.05	0.425
106800	1	1	1	0	0.05	0.325	0	0.05	0.425
107200	1	1	1	0	0.05	0.4	0	0.1	0.525
107600	1	1	1	0	0.05	0.475	0	0.1	0.425
108000	1	1	1	0	0.05	0.4	0	0.1	0.425
108400	1	1	1	0	0.05	0.4	0	0.1	0.45
108800	1	1	1	0	0.05	0.475	0	0.1	0.45
109200	1	1	1	0	0.1	0.5	0	0.1	0.45
109600	1	1	1	0	0.1	0.575	0	0.1	0.525
110000	1	1	1	0	0.1	0.6	0	0.1	0.45
110400	1	1	1	0	0.1	0.6	0	0.2	0.55
110800	1	1	1	0	0.05	0.5	0	0.2	0.55
111200	0.925	1	1	0	0.05	0.425	0	0.15	0.55
111600	0.925	1	1	0	0.05	0.425	0	0.15	0.625
112000	0.925	1	1	0	0.05	0.425	0	0.1	0.6
112400	0.925	1	1	0	0.05	0.425	0	0.1	0.575
112800	0.925	1	1	0	0.05	0.35	0	0.1	0.575
113200	0.925	1	1	0	0	0.25	0	0.1	0.6
113600	0.925	1	1	0	0	0.175	0	0.1	0.6
114000	0.925	1	1	0	0	0.175	0	0.1	0.6
114400	0.925	1	1	0	0	0.175	0	0	0.575
114800	0.925	1	1	0	0	0.175	0	0	0.675
115200	1	1	1	0	0	0.175	0	0	0.65
115600	1	1	1	0	0	0.2	0	0	0.575
116000	1	1	1	0	0	0.2	0	0	0.6
116400	1	1	1	0	0	0.2	0	0	0.6
116800	1	1	1	0	0	0.3	0	0	0.7
117200	1	1	1	0	0	0.3	0	0	0.675
117600	1	1	1	0	0	0.3	0	0.05	0.7
118000	1	1	1	0	0	0.2	0	0.05	0.7
118400	1	1	1	0	0	0.275	0	0.05	0.7
118800	1	1	1	0	0.05	0.375	0	0.05	0.675
119200	1	1	1	0	0.05	0.375	0	0.05	0.7
119600	1	1	1	0	0.05	0.275	0	0.05	0.7
120000	0.9	1	1	0	0.05	0.35	0	0.05	0.7
120400	0.9	1	1	0	0.05	0.35	0	0.05	0.725
120800	0.9	1	1	0	0.1	0.35	0	0.05	0.725
121200	0.9	1	1	0	0.1	0.35	0	0.1	0.75
121600	0.9	1	1	0	0.1	0.45	0	0.1	0.75
122000	0.9	1	1	0	0.1	0.45	0	0.1	0.825
122400	0.9	1	1	0	0.1	0.375	0	0.2	0.85
122800	0.9	1	1	0	0.05	0.35	0	0.2	0.775
123200	0.9	1	1	0	0.05	0.45	0	0.2	0.675
123600	0.9	1	1	0	0.05	0.45	0	0.2	0.675
124000	1	1	1	0	0.05	0.45	0	0.3	0.675
124400	0.925	1	1	0	0.05	0.55	0.025	0.4	0.675
124800	0.925	1	1	0	0.05	0.55	0.025	0.4	0.65
125200	0.925	1	1	0	0.05	0.625	0.025	0.4	0.65
125600	0.925	1	1	0	0.05	0.6	0.025	0.35	0.625
126000	0.925	1	1	0	0.05	0.675	0.025	0.35	0.65
126400	0.925	1	1	0	0.05	0.675	0.025	0.25	0.625
126800	0.925	1	1	0	0.05	0.6	0.025	0.25	0.625
127200	0.925	1	1	0	0.05	0.6	0.025	0.3	0.725
127600	0.925	1	1	0	0.1	0.7	0.025	0.3	0.725
128000	0.925	1	1	0	0.1	0.625	0.025	0.2	0.725
128400	1	1	1	0	0.1	0.525	0	0.1	0.725
128800	1	1	1	0	0.05	0.5	0	0.15	0.75
129200	1	1	1	0	0.15	0.525	0	0.1	0.65
129600	1	1	1	0	0.15	0.525	0	0.15	0.675
130000	1	1	1	0	0.15	0.45	0	0.15	0.575
130400	1	1	1	0	0.15	0.525	0	0.15	0.5
130800	1	1	1	0	0.15	0.525	0	0.15	0.6
131200	1	1	1	0	0.15	0.5	0	0.1	0.5
131600	1	1	1	0	0.1	0.475	0	0.15	0.6
132000	1	1	1	0	0.1	0.475	0	0.15	0.575
132400	1	1	1	0	0.1	0.575	0	0.15	0.55
132800	1	1	1	0	0.1	0.5	0	0.1	0.55
133200	1	1	1	0	0	0.5	0	0.1	0.625
133600	1	1	1	0	0	0.425	0	0.05	0.525
134000	1	1	1	0	0	0.425	0	0.1	0.625
134400	1	1	1	0	0	0.425	0	0.1	0.625
134800	1	1	1	0	0	0.525	0	0.1	0.525
135200	1	1	1	0	0	0.45	0	0.1	0.6
135600	1	1	1	0	0	0.375	0	0.05	0.575
136000	1	1	1	0	0	0.45	0	0.05	0.575
136400	1	1	1	0	0	0.35	0	0.05	0.575
136800	1	1	1	0	0	0.35	0	0.05	0.475
137200	1	1	1	0	0	0.25	0	0.05	0.4
137600	1	1	1	0	0	0.325	0	0.05	0.4
138000	1	1	1	0	0	0.4	0	0	0.3
138400	1	1	1	0	0	0.4	0	0	0.375
138800	1	1	1	0	0	0.3	0	0	0.375
139200	1	1	1	0	0	0.3	0	0.05	0.4
139600	1	1	1	0	0.05	0.4	0	0.05	0.425
140000	1	1	1	0	0.05	0.325	0	0.05	0.425
140400	1	1	1	0	0.05	0.325	0	0.05	0.45
140800	1	1	1	0	0.05	0.325	0.025	0.15	0.55
141200	1	1	1	0	0.05	0.4	0.025	0.15	0.55
141600	1	1	1	0	0.05	0.325	0.025	0.2	0.65
142000	1	1	1	0	0.05	0.35	0.025	0.2	0.75
142400	1	1	1	0	0.05	0.275	0.025	0.2	0.775
142800	1	1	1	0	0.05	0.375	0.025	0.2	0.85
143200	1	1	1	0	0.05	0.375	0.025	0.15	0.75
143600	0.9	1	1	0	0	0.275	0.025	0.15	0.725
144000	0.9	1	1	0	0	0.35	0.025	0.15	0.725
144400	0.9	1	1	0	0	0.35	0.025	0.25	0.725
144800	0.9	1	1	0	0	0.425	0	0.15	0.725
145200	0.9	1	1	0	0	0.425	0	0.15	0.825
145600	0.9	1	1	0	0	0.425	0	0.1	0.8
146000	0.9	1	1	0	0	0.425	0	0.2	0.8
146400	0.9	1	1	0	0	0.425	0	0.2	0.7
146800	0.9	1	1	0	0	0.325	0	0.2	0.625
147200	0.9	1	1	0	0	0.4	0	0.2	0.7
147600	1	1	1	0	0	0.4	0	0.2	0.625
148000	1	1	1	0	0	0.325	0	0.2	0.625
148400	1	1	1	0	0	0.325	0	0.15	0.625
148800	1	1	1	0	0	0.325	0	0.15	0.6
149200	1	1	1	0	0	0.25	0	0.15	0.6
149600	1	1	1	0	0	0.325	0	0.15	0.525
150000	1	1	1	0	0	0.3	0	0.05	0.525
150400	1	1	1	0	0	0.3	0	0.05	0.625
150800	1	1	1	0	0	0.3	0	0.05	0.725
151200	1	1	1	0	0	0.225	0	0.05	0.725
151600	1	1	1	0	0	0.225	0	0.05	0.725
152000	1	1	1	0	0	0.225	0	0.05	0.65
152400	1	1	1	0	0	0.225	0	0	0.65
152800	1	1	1	0	0	0.15	0	0	0.575
153200	1	1	1	0	0	0.15	0	0	0.475
153600	1	1	1	0	0	0.15	0	0	0.55
154000	1	1	1	0	0	0.075	0	0.05	0.55
154400	1	1	1	0	0.1	0.175	0	0.05	0.525
154800	1	1	1	0	0.15	0.275	0	0.05	0.425
155200	1	1	1	0	0.15	0.35	0	0.05	0.35
155600	1	1	1	0	0.15	0.35	0	0.05	0.45
156000	1	1	1	0	0.15	0.425	0	0.05	0.525
156400	1	1	1	0	0.15	0.425	0	0.05	0.425
156800	1	1	1	0	0.15	0.525	0	0.05	0.525
157200	0.925	1	1	0	0.15	0.525	0	0.05	0.525
157600	0.925	1	1	0	0.15	0.45	0	0.05	0.525
158000	0.925	1	1	0	0.15	0.45	0	0	0.425
158400	0.925	1	1	0	0.05	0.425	0	0	0.425
158800	0.925	1	1	0	0	0.325	0	0	0.425
159200	0.925	1	1	0	0	0.25	0	0	0.5
159600	0.925	1	1	0	0	0.25	0	0	0.5
160000	0.925	1	1	0	0	0.175	0	0	0.425
160400	0.925	1	1	0	0	0.175	0	0	0.5
160800	0.925	1	1	0	0	0.15	0	0	0.475
161200	1	1	1	0	0	0.15	0	0	0.55
161600	1	1	1	0	0	0.225	0	0	0.475
162000	1	1	1	0	0	0.225	0	0	0.475
162400	1	1	1	0	0	0.15	0	0.05	0.5
162800	1	1	1	0	0	0.15	0	0.1	0.6
163200	1	1	1	0	0	0.225	0	0.2	0.625
163600	1	1	1	0	0	0.225	0	0.2	0.525
164000	1	1	1	0	0	0.225	0	0.2	0.625
164400	1	1	1	0	0	0.225	0	0.2	0.55
164800	1	1	1	0	0	0.225	0	0.2	0.475
165200	1	1	1	0	0	0.225	0	0.2	0.475
165600	1	1	1	0	0	0.225	0	0.2	0.575
166000	1	1	1	0	0	0.3	0	0.2	0.575
166400	1	1	1	0	0	0.375	0	0.15	0.55
166800	1	1	1	0	0	0.375	0	0.1	0.45
167200	1	1	1	0	0	0.4	0	0	0.35
167600	1	1	1	0	0.1	0.5	0	0	0.35
168000	1	1	1	0	0.1	0.5	0	0	0.35
168400	1	1	1	0	0.1	0.5	0	0	0.45
168800	1	1	1	0	0.1	0.5	0	0	0.45
169200	1	1	1	0	0.1	0.6	0	0	0.375
169600	1	1	1	0	0.1	0.6	0	0	0.275
170000	1	1	1	0	0.1	0.625	0	0	0.35
170400	1	1	1	0	0.1	0.55	0	0	0.275
170800	1	1	1	0	0.1	0.55	0	0.05	0.375
171200	1	1	1	0	0.1	0.45	0	0.05	0.45
171600	1	1	1	0	0	0.35	0	0.05	0.55
172000	1	1	1	0	0	0.35	0	0.15	0.55
172400	1	1	1	0	0	0.45	0	0.15	0.525
172800	1	1	1	0	0	0.475	0	0.15	0.6
173200	1	1	1	0	0	0.375	0	0.15	0.675
173600	1	1	1	0	0	0.3	0	0.25	0.775
174000	1	1	1	0	0	0.2	0	0.3	0.8
174400	1	1	1	0	0	0.2	0	0.3	0.875
174800	1	1	1	0	0	0.3	0	0.25	0.85
175200	1	1	1	0	0	0.375	0	0.3	0.875
175600	1	1	1	0	0	0.475	0	0.3	0.85
176000	1	1	1	0	0.05	0.575	0	0.25	0.85
176400	1	1	1	0	0.05	0.575	0	0.25	0.875
176800	1	1	1	0	0.05	0.55	0	0.25	0.8
177200	1	1	1	0	0.05	0.55	0	0.25	0.725
177600	1	1	1	0	0.05	0.625	0	0.25	0.725
178000	1	1	1	0	0.05	0.7	0	0.25	0.725
178400	1	1	1	0	0.05	0.775	0	0.25	0.725
178800	1	1	1	0	0.05	0.675	0	0.25	0.725
179200	1	1	1	0	0.1	0.7	0	0.2	0.725
179600	1	1	1	0	0.1	0.675	0	0.2	0.725
180000	1	1	1	0	0.05	0.675	0	0.2	0.725
180400	1	1	1	0	0.05	0.575	0	0.2	0.625
180800	1	1	1	0	0.05	0.6	0	0.2	0.7
181200	1	1	1	0	0.05	0.6	0	0.2	0.775
181600	1	1	1	0	0.05	0.625	0	0.2	0.775
182000	1	1	1	0	0.05	0.65	0	0.2	0.775
182400	1	1	1	0	0.05	0.65	0	0.2	0.8
182800	1	1	1	0	0.05	0.65	0	0.25	0.825
183200	1	1	1	0	0	0.625	0	0.25	0.8
183600	1	1	1	0	0.05	0.65	0	0.25	0.825
184000	1	1	1	0	0.05	0.625	0	0.2	0.725
184400	1	1	1	0	0.05	0.7	0	0.2	0.8
184800	1	1	1	0	0.05	0.6	0	0.2	0.725
185200	1	1	1	0	0.05	0.675	0	0.2	0.75
185600	1	1	1	0	0.05	0.65	0	0.1	0.75
186000	1	1	1	0	0.05	0.55	0	0.05	0.725
186400	1	1	1	0	0.05	0.55	0	0.05	0.7
186800	1	1	1	0	0.05	0.625	0	0.05	0.7
187200	1	1	1	0	0.05	0.55	0	0.05	0.725
187600	1	1	1	0	0.1	0.55	0	0.05	0.7
188000	0.925	1	1	0	0.1	0.575	0	0.05	0.775
188400	0.925	1	1	0	0.15	0.6	0	0.05	0.8
188800	0.925	1	1	0	0.15	0.6	0	0.05	0.8
189200	0.925	1	1	0	0.15	0.6	0	0.05	0.7
189600	0.925	1	1	0	0.15	0.6	0	0.05	0.7
190000	0.925	1	1	0	0.15	0.6	0	0.05	0.7
190400	0.925	1	1	0	0.15	0.6	0	0.05	0.7
190800	0.925	1	1	0	0.2	0.625	0	0	0.7
191200	0.925	1	1	0	0.2	0.7	0	0.1	0.7
191600	0.925	1	1	0	0.1	0.675	0	0.1	0.625
192000	1	1	1	0	0.1	0.575	0	0.1	0.625
192400	1	1	1	0	0.05	0.55	0	0.1	0.525
192800	1	1	1	0	0.05	0.625	0	0.1	0.6
193200	1	1	1	0	0.05	0.55	0	0.1	0.7
193600	1	1	1	0	0.05	0.475	0	0.1	0.675
194000	1	1	1	0	0.05	0.575	0	0.1	0.6
194400	1	1	1	0	0.05	0.6	0	0.1	0.525
194800	1	1	1	0	0	0.5	0	0.15	0.525
195200	1	1	1	0	0	0.425	0	0.05	0.425
195600	1	1	1	0	0.05	0.45	0	0.05	0.525
196000	1	1	1	0	0.1	0.55	0	0.05	0.55
196400	1	1	1	0	0.1	0.55	0	0.05	0.55
196800	1	1	1	0	0.1	0.55	0	0.1	0.575
197200	1	1	1	0	0.1	0.55	0	0.1	0.475
197600	1	1	1	0	0.1	0.625	0	0.1	0.475
198000	1	1	1	0	0.1	0.525	0	0.1	0.475
198400	1	1	1	0	0.15	0.525	0	0.1	0.55
198800	1	1	1	0	0.15	0.525	0	0.05	0.45
199200	1	1	1	0	0.15	0.525	0	0.05	0.525
199600	1	1	1	0	0.1	0.5	0	0.05	0.425
200000	1	1	1	0	0.05	0.4	0	0.05	0.4
200400	1	1	1	0	0.1	0.425	0	0.05	0.475
200800	1	1	1	0	0.1	0.35	0	0.1	0.475
201200	0.925	1	1	0	0.1	0.35	0	0.2	0.575
201600	0.925	1	1	0	0.1	0.375	0	0.25	0.6
202000	0.925	1	1	0.025	0.2	0.475	0	0.3	0.7
202400	0.925	1	1	0.025	0.15	0.45	0	0.35	0.725
202800	0.925	1	1	0.025	0.15	0.45	0	0.35	0.725
203200	0.925	1	1	0.025	0.2	0.55	0	0.4	0.75
203600	0.925	1	1	0.025	0.2	0.55	0	0.4	0.75
204000	0.925	1	1	0.025	0.2	0.65	0	0.4	0.675
204400	0.925	1	1	0.025	0.15	0.625	0	0.45	0.7
204800	0.925	1	1	0.025	0.15	0.7	0	0.35	0.6
205200	1	1	1	0.025	0.15	0.7	0	0.25	0.6
205600	1	1	1	0.025	0.15	0.675	0	0.3	0.6
206000	1	1	1	0	0.05	0.575	0	0.25	0.6
206400	1	1	1	0	0.05	0.5	0	0.2	0.5
206800	1	1	1	0	0.05	0.575	0	0.2	0.5
207200	0.925	1	1	0	0	0.475	0	0.15	0.475
207600	0.925	1	1	0	0	0.4	0	0.25	0.575
208000	0.925	1	1	0	0.05	0.4	0	0.25	0.575
208400	0.925	1	1	0	0.05	0.325	0	0.2	0.475
208800	0.925	1	1	0	0.05	0.325	0	0.2	0.575
209200	0.925	1	1	0	0.05	0.425	0	0.2	0.55
209600	0.925	1	1	0	0.05	0.425	0	0.1	0.45
210000	0.925	1	1	0	0.05	0.5	0	0.1	0.425
210400	0.925	1	1	0	0.05	0.6	0	0.15	0.525
210800	0.925	1	1	0	0.1	0.625	0	0.15	0.6
211200	1	1	1	0	0.1	0.625	0	0.15	0.625
211600	1	1	1	0	0.1	0.7	0	0.05	0.525
212000	1	1	1	0	0.05	0.6	0	0.05	0.525
212400	1	1	1	0	0.05	0.6	0	0.05	0.525
212800	1	1	1	0	0.05	0.525	0	0.05	0.525
213200	1	1	1	0	0.05	0.425	0	0.05	0.55
213600	1	1	1	0	0.05	0.35	0	0.15	0.65
214000	1	1	1	0	0.05	0.275	0	0.15	0.675
214400	1	1	1	0	0.05	0.275	0	0.1	0.675
214800	1	1	1	0	0.1	0.275	0	0.1	0.675
215200	1	1	1	0	0.1	0.35	0.025	0.2	0.675
215600	1	1	1	0	0.15	0.375	0.025	0.2	0.675
216000	1	1	1	0	0.2	0.475	0.025	0.2	0.675
216400	1	1	1	0	0.2	0.475	0.025	0.2	0.75
216800	1	1	1	0	0.2	0.575	0.025	0.2	0.725
217200	1	1	1	0	0.25	0.675	0.025	0.2	0.625
217600	1	1	1	0	0.25	0.675	0.025	0.1	0.525
218000	1	1	1	0	0.25	0.675	0.025	0.1	0.425
218400	1	1	1	0	0.25	0.65	0.025	0.1	0.4
218800	1	1	1	0	0.15	0.65	0.025	0.1	0.425
219200	1	1	1	0	0.15	0.575	0	0	0.325
219600	1	1	1	0	0.1	0.475	0	0	0.325
220000	1	1	1	0	0.05	0.375	0	0	0.425
220400	1	1	1	0	0.05	0.375	0	0	0.35
220800	1	1	1	0	0.05	0.275	0	0	0.275
221200	1	1	1	0	0	0.275	0	0	0.375
221600	1	1	1	0	0	0.275	0	0	0.375
222000	1	1	1	0	0	0.275	0	0.05	0.475
222400	1	1	1	0	0	0.2	0	0.05	0.475
222800	1	1	1	0	0	0.175	0	0.05	0.375
223200	1	1	1	0	0	0.175	0	0.05	0.375
223600	1	1	1	0	0	0.25	0	0.05	0.375
224000	1	1	1	0	0	0.25	0	0.05	0.275
224400	1	1	1	0	0	0.25	0.025	0.15	0.375
224800	1	1	1	0	0	0.25	0.025	0.15	0.475
225200	1	1	1	0	0	0.15	0.025	0.15	0.475
225600	1	1	1	0	0	0.15	0.025	0.15	0.475
226000	1	1	1	0	0	0.15	0.025	0.1	0.375
226400	1	1	1	0	0	0.225	0.025	0.1	0.4
226800	1	1	1	0	0	0.15	0.025	0.1	0.475
227200	1	1	1	0	0	0.15	0.025	0.15	0.575
227600	1	1	1	0	0.05	0.175	0.025	0.15	0.575
228000	1	1	1	0	0.05	0.25	0.025	0.15	0.575
228400	1	1	1	0	0.05	0.25	0	0.05	0.475
228800	1	1	1	0	0.05	0.35	0	0.1	0.475
229200	1	1	1	0	0.05	0.35	0	0.2	0.475
229600	1	1	1	0	0.05	0.35	0	0.2	0.475
230000	1	1	1	0	0.05	0.425	0	0.2	0.475
230400	1	1	1	0	0.05	0.425	0	0.2	0.45
230800	1	1	1	0	0.05	0.5	0	0.2	0.45
231200	1	1	1	0	0.05	0.575	0.025	0.25	0.45
231600	1	1	1	0	0	0.475	0.025	0.25	0.55
232000	1	1	1	0	0.05	0.5	0.025	0.3	0.65
232400	1	1	1	0	0.05	0.5	0.025	0.3	0.725
232800	1	1	1	0	0.1	0.5	0.025	0.25	0.625
233200	1	1	1	0	0.1	0.5	0.025	0.15	0.6
233600	1	1	1	0	0.1	0.6	0.025	0.2	0.7
234000	1	1	1	0	0.1	0.625	0.025	0.2	0.8
234400	1	1	1	0	0.1	0.55	0.025	0.2	0.8
234800	1	1	1	0	0.1	0.475	0.05	0.3	0.825
235200	1	1	1	0	0.1	0.4	0.025	0.25	0.825
235600	1	1	1	0	0.1	0.4	0.025	0.25	0.8
236000	1	1	1	0	0.05	0.3	0.025	0.25	0.8
236400	1	1	1	0	0.05	0.4	0.025	0.25	0.725
236800	1	1	1	0	0	0.375	0.025	0.25	0.725
237200	1	1	1	0	0	0.45	0.025	0.25	0.65
237600	1	1	1	0	0	0.425	0.025	0.2	0.55
238000	1	1	1	0	0	0.425	0.025	0.2	0.525
238400	1	1	1	0	0	0.425	0.025	0.2	0.45
238800	1	1	1	0	0	0.5	0	0.1	0.35
239200	1	1	1	0	0	0.575	0	0.05	0.325
239600	1	1	1	0	0	0.675	0	0.1	0.35
240000	1	1	1	0	0	0.775	0	0.1	0.35
240400	1	1	1	0	0.05	0.775	0	0.1	0.35
240800	1	1	1	0	0.05	0.7	0	0.1	0.425
241200	1	1	1	0	0.05	0.725	0	0.1	0.5
241600	1	1	1	0	0.05	0.65	0	0.1	0.6
242000	1	1	1	0	0.05	0.55	0	0.1	0.525
242400	1	1	1	0	0.05	0.55	0	0.1	0.525
242800	1	1	1	0	0.1	0.575	0	0.1	0.525
243200	1	1	1	0	0.1	0.6	0	0.1	0.55
243600	1	1	1	0	0.1	0.575	0	0.1	0.55
244000	1	1	1	0	0.15	0.575	0	0.1	0.55
244400	1	1	1	0	0.1	0.55	0	0.15	0.65
244800	1	1	1	0	0.1	0.65	0	0.15	0.675
245200	1	1	1	0	0.1	0.65	0	0.15	0.6
245600	1	1	1	0	0.1	0.75	0	0.15	0.6
246000	1	1	1	0	0.1	0.825	0	0.15	0.6
246400	1	1	1	0	0.1	0.9	0	0.15	0.6
246800	1	1	1	0	0.05	0.875	0	0.15	0.675
247200	1	1	1	0	0.05	0.775	0	0.15	0.675
247600	1	1	1	0	0.05	0.7	0	0.1	0.65
248000	1	1	1	0	0	0.6	0	0.05	0.55
248400	1	1	1	0	0	0.625	0.025	0.1	0.55
248800	1	1	1	0	0	0.625	0.05	0.2	0.55
249200	1	1	1	0	0	0.525	0.05	0.2	0.55
249600	1	1	1	0	0	0.425	0.05	0.2	0.55
250000	1	1	1	0	0	0.45	0.05	0.2	0.625
250400	1	1	1	0	0	0.375	0.05	0.2	0.7
250800	1	1	1	0	0	0.375	0.05	0.25	0.725
251200	1	1	1	0	0	0.475	0.05	0.25	0.7
251600	1	1	1	0.025	0.1	0.575	0.05	0.25	0.7
252000	1	1	1	0.025	0.1	0.575	0.05	0.25	0.8
252400	1	1	1	0.025	0.1	0.575	0.025	0.15	0.775
252800	1	1	1	0.025	0.1	0.55	0	0.05	0.675
253200	1	1	1	0.025	0.1	0.55	0	0.05	0.675
253600	1	1	1	0.025	0.1	0.55	0	0.05	0.575
254000	1	1	1	0.025	0.1	0.55	0	0.05	0.5
254400	1	1	1	0.025	0.1	0.55	0	0.05	0.5
254800	1	1	1	0.025	0.1	0.575	0	0	0.475
255200	1	1	1	0.025	0.1	0.475	0	0	0.475
255600	1	1	1	0	0	0.375	0	0	0.4
256000	1	1	1	0	0	0.375	0	0	0.4
256400	1	1	1	0	0	0.35	0	0	0.4
256800	1	1	1	0	0	0.275	0.025	0.1	0.5
257200	1	1	1	0	0	0.275	0.025	0.1	0.6
257600	1	1	1	0	0	0.35	0.025	0.1	0.675
258000	1	1	1	0	0	0.25	0.025	0.1	0.675
258400	1	1	1	0	0	0.35	0.025	0.1	0.675
258800	1	1	1	0	0	0.25	0.025	0.1	0.6
259200	1	1	1	0	0	0.35	0.025	0.1	0.6
259600	1	1	1	0	0.05	0.45	0.025	0.1	0.6
260000	1	1	1	0	0.05	0.45	0.025	0.1	0.5
260400	1	1	1	0	0.05	0.475	0.025	0.1	0.5
260800	1	1	1	0	0.05	0.55	0	0	0.5
261200	1	1	1	0	0.15	0.65	0	0.05	0.5
261600	1	1	1	0	0.15	0.575	0	0.05	0.5
262000	1	1	1	0	0.25	0.675	0	0.05	0.575
262400	1	1	1	0	0.25	0.675	0	0.05	0.5
262800	1	1	1	0	0.25	0.675	0	0.05	0.5
263200	1	1	1	0	0.25	0.575	0	0.05	0.425
263600	1	1	1	0	0.2	0.475	0	0.05	0.5
264000	1	1	1	0	0.2	0.55	0	0.05	0.5
264400	1	1	1	0	0.25	0.55	0.1	0.15	0.525
264800	1	1	1	0	0.25	0.575	0.1	0.15	0.425
265200	1	1	1	0	0.15	0.575	0.1	0.1	0.325
265600	1	1	1	0	0.15	0.575	0.1	0.15	0.35
266000	1	1	1	0	0.05	0.475	0.1	0.15	0.275
266400	1	1	1	0	0.05	0.45	0.1	0.15	0.375
266800	1	1	1	0	0.05	0.55	0.1	0.15	0.475
267200	1	1	1	0	0.05	0.55	0.1	0.15	0.475
267600	1	1	1	0	0.05	0.55	0.1	0.15	0.5
268000	1	1	1	0	0.05	0.575	0.1	0.15	0.5
268400	1	1	1	0	0	0.55	0	0.05	0.475
268800	1	1	1	0	0	0.525	0	0.05	0.475
269200	1	1	1	0	0	0.425	0	0.05	0.475
269600	1	1	1	0	0	0.5	0	0	0.475
270000	1	1	1	0	0	0.5	0	0	0.475
270400	1	1	1	0	0	0.425	0	0	0.375
270800	1	1	1	0	0	0.325	0	0	0.275
271200	1	1	1	0	0	0.4	0	0	0.35
271600	1	1	1	0	0	0.475	0	0.05	0.35
272000	1	1	1	0	0.1	0.475	0	0.05	0.425
272400	1	1	1	0	0.1	0.475	0	0.05	0.35
272800	1	1	1	0	0.1	0.4	0	0.05	0.45
273200	1	1	1	0	0.15	0.5	0	0.05	0.45
273600	1	1	1	0	0.15	0.425	0	0.1	0.45
274000	1	1	1	0	0.15	0.425	0	0.1	0.45
274400	1	1	1	0	0.15	0.425	0	0.1	0.45
274800	1	1	1	0	0.15	0.425	0	0.1	0.525
275200	1	1	1	0	0.15	0.425	0	0.1	0.525
275600	1	1	1	0	0.15	0.35	0	0.05	0.5
276000	1	1	1	0	0.05	0.35	0	0.05	0.5
276400	1	1	1	0	0.05	0.275	0	0.05	0.575
276800	1	1	1	0	0.05	0.375	0	0.05	0.55
277200	1	1	1	0	0	0.275	0	0.05	0.65
277600	1	1	1	0	0	0.35	0	0	0.55
278000	1	1	1	0	0	0.45	0	0.1	0.65
278400	1	1	1	0	0	0.525	0	0.1	0.65
278800	1	1	1	0	0.05	0.625	0	0.1	0.575
279200	1	1	1	0	0.05	0.625	0	0.1	0.575
279600	1	1	1	0	0.05	0.7	0	0.1	0.6
280000	1	1	1	0	0.05	0.675	0	0.1	0.6
280400	1	1	1	0	0.1	0.775	0	0.15	0.625
280800	1	1	1	0	0.1	0.675	0	0.15	0.55
281200	1	1	1	0	0.1	0.675	0	0.15	0.55
281600	1	1	1	0	0.1	0.6	0	0.15	0.55
282000	1	1	1	0	0.1	0.5	0	0.05	0.525
282400	1	1	1	0	0.1	0.425	0	0.05	0.625
282800	1	1	1	0	0.05	0.325	0	0.1	0.725
283200	1	1	1	0	0.05	0.35	0	0.2	0.75
283600	1	1	1	0	0.05	0.275	0	0.2	0.65
284000	1	1	1	0	0.05	0.3	0	0.2	0.575
284400	1	1	1	0	0.05	0.3	0	0.2	0.575
284800	1	1	1	0	0.05	0.3	0.025	0.3	0.675
285200	1	1	1	0	0.15	0.4	0.025	0.3	0.575
285600	0.925	1	1	0	0.15	0.4	0.025	0.3	0.575
286000	0.925	1	1	0	0.15	0.475	0.025	0.35	0.6
286400	0.925	1	1	0	0.15	0.475	0.025	0.35	0.575
286800	0.925	1	1	0	0.15	0.575	0.025	0.3	0.575
287200	0.925	1	1	0	0.15	0.475	0.025	0.2	0.55
287600	0.925	1	1	0	0.15	0.475	0.025	0.2	0.625
288000	0.925	1	1	0	0.15	0.375	0.05	0.3	0.725
288400	0.925	1	1	0	0.1	0.35	0.05	0.25	0.625
288800	0.925	1	1	0	0.1	0.425	0.05	0.25	0.625
289200	0.925	1	1	0	0	0.325	0.05	0.25	0.725
289600	1	1	1	0	0	0.4	0.05	0.25	0.825
290000	1	1	1	0	0	0.325	0.05	0.2	0.725
290400	1	1	1	0	0	0.325	0.05	0.25	0.75
290800	1	1	1	0	0	0.325	0.05	0.25	0.725
291200	1	1	1	0	0	0.325	0.05	0.25	0.75
291600	1	1	1	0	0	0.325	0.05	0.25	0.675
292000	1	1	1	0	0	0.4	0.025	0.15	0.675
292400	1	1	1	0	0	0.325	0.025	0.15	0.775
292800	1	1	1	0	0	0.325	0	0.05	0.675
293200	1	1	1	0	0	0.325	0	0.05	0.65
293600	1	1	1	0	0	0.325	0	0.05	0.625
294000	1	1	1	0	0	0.325	0	0.05	0.625
294400	1	1	1	0	0.05	0.425	0	0	0.6
294800	1	1	1	0	0.05	0.325	0	0	0.625
295200	1	1	1	0	0.05	0.4	0	0	0.525
295600	1	1	1	0	0.05	0.4	0	0	0.6
296000	1	1	1	0	0.05	0.425	0	0	0.575
296400	1	1	1	0	0.05	0.425	0	0	0.575
296800	1	1	1	0	0.05	0.45	0	0.05	0.675
297200	1	1	1	0	0.1	0.55	0.1	0.15	0.7
297600	1	1	1	0	0.15	0.575	0.1	0.15	0.725
298000	1	1	1	0	0.15	0.575	0.1	0.15	0.825
298400	1	1	1	0	0.1	0.475	0.1	0.15	0.825
298800	1	1	1	0	0.1	0.575	0.1	0.15	0.825
299200	1	1	1	0	0.1	0.575	0.1	0.15	0.825
299600	1	1	1	0	0.1	0.65	0.1	0.15	0.75
300000	1	1	1	0	0.1	0.625	0.1	0.15	0.675
300400	1	1	1	0	0.1	0.625	0.1	0.2	0.675
300800	1	1	1	0	0.1	0.525	0.1	0.15	0.65
301200	1	1	1	0	0.05	0.525	0	0.05	0.625
301600	1	1	1	0	0	0.525	0	0.05	0.525
302000	1	1	1	0	0	0.525	0	0.05	0.425
302400	1	1	1	0	0.1	0.625	0	0.15	0.45
302800	1	1	1	0	0.15	0.625	0	0.15	0.35
303200	1	1	1	0	0.15	0.55	0	0.2	0.45
303600	1	1	1	0	0.15	0.475	0	0.2	0.45
304000	1	1	1	0	0.15	0.475	0	0.2	0.55
304400	1	1	1	0	0.15	0.575	0	0.2	0.55
304800	1	1	1	0	0.15	0.65	0	0.25	0.575
305200	1	1	1	0	0.15	0.65	0	0.3	0.6
305600	1	1	1	0	0.15	0.55	0	0.3	0.675
306000	1	1	1	0	0.15	0.55	0	0.4	0.775
306400	1	1	1	0	0.05	0.45	0	0.3	0.675
306800	1	1	1	0	0	0.425	0	0.3	0.675
307200	1	1	1	0	0	0.425	0	0.25	0.65
307600	1	1	1	0	0	0.525	0	0.25	0.65
308000	1	1	1	0	0	0.45	0	0.25	0.65
308400	1	1	1	0	0	0.425	0	0.25	0.65
308800	1	1	1	0	0	0.45	0	0.2	0.65
309200	1	1	1	0	0	0.35	0	0.15	0.55
309600	1	1	1	0	0	0.35	0	0.15	0.55
310000	1	1	1	0	0.05	0.45	0	0.05	0.525
310400	1	1	1	0	0.05	0.45	0	0.05	0.6
310800	1	1	1	0	0.05	0.45	0	0.05	0.6
311200	1	1	1	0	0.05	0.45	0	0.05	0.625
311600	1	1	1	0	0.05	0.45	0	0.05	0.625
312000	1	1	1	0	0.1	0.55	0	0.05	0.525
312400	1	1	1	0	0.1	0.475	0	0.05	0.525
312800	1	1	1	0	0.1	0.45	0	0.05	0.525
313200	1	1	1	0	0.1	0.45	0	0.05	0.625
313600	1	1	1	0	0.1	0.525	0	0.05	0.55
314000	1	1	1	0	0.05	0.525	0	0.05	0.475
314400	1	1	1	0	0.05	0.6	0	0.05	0.475
314800	1	1	1	0	0.05	0.6	0	0.1	0.575
315200	1	1	1	0	0.05	0.7	0	0.1	0.575
315600	1	1	1	0	0.05	0.7	0	0.1	0.575
316000	1	1	1	0	0	0.675	0	0.1	0.575
316400	1	1	1	0	0	0.675	0	0.1	0.575
316800	1	1	1	0	0	0.6	0	0.15	0.575
317200	1	1	1	0	0	0.7	0	0.15	0.475
317600	1	1	1	0	0	0.725	0	0.15	0.475
318000	1	1	1	0	0	0.725	0	0.15	0.55
318400	1	1	1	0	0	0.75	0	0.15	0.55
318800	1	1	1	0	0	0.675	0	0.2	0.55
319200	1	1	1	0	0	0.575	0	0.2	0.45
319600	1	1	1	0	0	0.55	0	0.2	0.45
320000	1	1	1	0	0	0.475	0	0.2	0.55
320400	1	1	1	0	0	0.475	0	0.15	0.55
320800	1	1	1	0	0.05	0.575	0	0.1	0.525
321200	1	1	1	0	0.05	0.475	0	0.1	0.525
321600	1	1	1	0	0.05	0.45	0	0.1	0.525
322000	1	1	1	0	0.05	0.35	0	0.1	0.525
322400	1	1	1	0	0.1	0.35	0	0.1	0.525
322800	1	1	1	0	0.1	0.35	0	0.05	0.525
323200	1	1	1	0	0.1	0.35	0	0.05	0.6
323600	1	1	1	0	0.1	0.275	0	0.05	0.675
324000	1	1	1	0	0.1	0.275	0	0.05	0.675
324400	1	1	1	0	0.1	0.275	0	0.05	0.675
324800	1	1	1	0	0.05	0.175	0	0.05	0.6
325200	1	1	1	0	0.05	0.175	0	0.05	0.6
325600	1	1	1	0	0.05	0.1	0	0.1	0.7
326000	1	1	1	0	0.05	0.1	0	0.1	0.625
326400	1	1	1	0	0	0.075	0	0.1	0.625
326800	1	1	1	0	0	0.175	0	0.05	0.625
327200	1	1	1	0	0	0.25	0	0.05	0.65
327600	1	1	1	0	0.05	0.35	0	0.05	0.575
328000	1	1	1	0	0.05	0.425	0	0.05	0.55
328400	1	1	1	0	0.05	0.525	0	0.05	0.45
328800	1	1	1	0	0.05	0.525	0	0.05	0.55
329200	1	1	1	0	0.05	0.525	0	0.05	0.65
329600	1	1	1	0	0.05	0.525	0	0	0.625
330000	1	1	1	0	0.05	0.6	0	0.05	0.725
330400	1	1	1	0	0.1	0.625	0	0.05	0.65
330800	1	1	1	0	0.1	0.525	0	0.05	0.625
331200	1	1	1	0	0.1	0.525	0	0.05	0.525
331600	1	1	1	0	0.1	0.525	0	0.15	0.625
332000	1	1	1	0	0.1	0.45	0	0.15	0.55
332400	1	1	1	0	0.1	0.45	0	0.15	0.55
332800	1	1	1	0	0.1	0.45	0	0.15	0.45
333200	1	1	1	0	0.2	0.55	0	0.15	0.425
333600	1	1	1	0	0.2	0.55	0	0.15	0.425
334000	1	1	1	0	0.2	0.475	0	0.1	0.325
334400	1	1	1	0	0.15	0.475	0	0.1	0.4
334800	1	1	1	0	0.15	0.55	0	0.1	0.325
335200	1	1	1	0	0.15	0.55	0	0.15	0.425
335600	1	1	1	0	0.1	0.45	0	0.05	0.425
336000	1	1	1	0	0.1	0.45	0	0.05	0.5
336400	1	1	1	0	0.1	0.425	0	0.05	0.6
336800	1	1	1	0	0.15	0.525	0	0.05	0.675
337200	1	1	1	0	0.05	0.525	0	0.05	0.6
337600	1	1	1	0	0.05	0.525	0	0.05	0.525
338000	1	1	1	0	0.05	0.525	0	0.05	0.6
338400	1	1	1	0	0.05	0.425	0	0.05	0.525
338800	1	1	1	0	0.05	0.35	0	0.05	0.6
339200	1	1	1	0	0.05	0.275	0	0	0.6
339600	1	1	1	0	0.05	0.375	0	0	0.575
340000	1	1	1	0	0.05	0.45	0	0	0.575
340400	1	1	1	0	0.05	0.45	0	0	0.55
340800	1	1	1	0	0	0.425	0	0	0.55
341200	1	1	1	0	0	0.325	0	0	0.55
341600	1	1	1	0	0	0.325	0	0	0.625
342000	1	1	1	0	0	0.425	0	0	0.65
342400	1	1	1	0	0	0.525	0	0	0.65
342800	1	1	1	0	0	0.525	0	0	0.65
343200	1	1	1	0	0	0.525	0	0	0.55
343600	1	1	1	0	0	0.425	0	0	0.475
344000	1	1	1	0	0	0.35	0	0	0.475
344400	1	1	1	0	0	0.35	0	0	0.4
344800	1	1	1	0	0	0.275	0	0	0.325
345200	1	1	1	0	0.05	0.375	0	0	0.425
345600	1	1	1	0	0.05	0.375	0	0	0.425
346000	1	1	1	0	0.05	0.375	0	0.05	0.425
346400	1	1	1	0	0.05	0.375	0	0.05	0.5
346800	1	1	1	0	0.15	0.475	0	0.05	0.5
347200	1	1	1	0	0.15	0.475	0	0.1	0.6
347600	1	1	1	0	0.15	0.475	0	0.1	0.675
348000	1	1	1	0	0.15	0.475	0	0.1	0.6
348400	1	1	1	0	0.25	0.5	0	0.1	0.7
348800	1	1	1	0	0.3	0.6	0	0.1	0.7
349200	1	1	1	0	0.25	0.5	0	0.1	0.675
349600	1	1	1	0	0.25	0.5	0	0.1	0.675
350000	1	1	1	0	0.25	0.4	0	0.05	0.575
350400	1	1	1	0	0.25	0.375	0	0.1	0.6
350800	1	1	1	0	0.15	0.275	0	0.1	0.6
351200	1	1	1	0	0.15	0.275	0	0.15	0.6
351600	1	1	1	0	0.15	0.35	0	0.15	0.6
352000	1	1	1	0	0.15	0.425	0	0.15	0.7
352400	1	1	1	0	0.05	0.325	0	0.15	0.675
352800	1	1	1	0	0	0.225	0	0.15	0.775
353200	1	1	1	0	0	0.225	0	0.15	0.7
353600	1	1	1	0	0	0.225	0	0.15	0.7
354000	1	1	1	0	0	0.325	0	0.15	0.7
354400	1	1	1	0	0	0.25	0	0.1	0.6
354800	1	1	1	0	0.05	0.35	0	0.1	0.625
355200	1	1	1	0	0.15	0.45	0	0	0.6
355600	1	1	1	0	0.2	0.475	0	0	0.6
356000	1	1	1	0	0.2	0.475	0	0	0.575
356400	1	1	1	0	0.2	0.475	0	0	0.6
356800	1	1	1	0	0.2	0.475	0	0.05	0.6
357200	1	1	1	0	0.2	0.575	0	0.05	0.675
357600	1	1	1	0	0.2	0.575	0	0.1	0.7
358000	1	1	1	0	0.25	0.575	0	0.2	0.8
358400	1	1	1	0	0.25	0.575	0	0.2	0.8
358800	1	1	1	0	0.2	0.55	0	0.2	0.7
359200	1	1	1	0	0.1	0.45	0	0.2	0.625
359600	1	1	1	0	0.15	0.45	0	0.2	0.65
360000	1	1	1	0	0.15	0.375	0	0.2	0.65
360400	1	1	1	0	0.15	0.45	0	0.2	0.65
360800	1	1	1	0	0.15	0.55	0	0.15	0.625
361200	1	1	1	0	0.15	0.525	0	0.15	0.625
361600	1	1	1	0	0.15	0.6	0	0.2	0.625
362000	1	1	1	0	0.1	0.6	0	0.1	0.6
362400	1	1	1	0	0.1	0.675	0	0.1	0.675
362800	1	1	1	0	0.1	0.675	0	0.1	0.675
363200	1	1	1	0	0.1	0.675	0	0.15	0.775
363600	1	1	1	0	0	0.575	0	0.15	0.775
364000	1	1	1	0	0.05	0.675	0	0.2	0.8
364400	1	1	1	0	0.05	0.6	0	0.3	0.8
364800	1	1	1	0	0.05	0.5	0	0.35	0.825
365200	1	1	1	0	0.05	0.425	0	0.35	0.825
365600	1	1	1	0	0.05	0.35	0	0.25	0.725
366000	1	1	1	0	0.05	0.35	0	0.25	0.725
366400	1	1	1	0	0.05	0.35	0	0.25	0.65
366800	1	1	1	0	0.05	0.275	0	0.25	0.75
367200	1	1	1	0	0.1	0.375	0	0.2	0.725
367600	1	1	1	0	0.1	0.375	0	0.2	0.625
368000	1	1	1	0	0.05	0.275	0	0.15	0.625
368400	1	1	1	0	0.05	0.275	0	0.05	0.525
368800	1	1	1	0	0.05	0.275	0	0.05	0.525
369200	1	1	1	0	0.05	0.275	0	0.05	0.45
369600	1	1	1	0	0.05	0.275	0	0.05	0.525
370000	1	1	1	0	0.05	0.25	0	0.05	0.525
370400	1	1	1	0	0.05	0.175	0	0.05	0.6
370800	1	1	1	0	0.05	0.175	0	0.05	0.6
371200	1	1	1	0	0.1	0.175	0	0.05	0.525
371600	1	1	1	0	0.1	0.175	0	0.05	0.625
372000	1	1	1	0	0.1	0.175	0	0.05	0.6
372400	1	1	1	0	0.1	0.25	0	0.05	0.7
372800	1	1	1	0	0.1	0.25	0	0	0.675
373200	1	1	1	0	0.1	0.25	0	0	0.675
373600	1	1	1	0	0.1	0.325	0	0	0.675
374000	1	1	1	0	0.1	0.325	0	0.05	0.7
374400	1	1	1	0	0.1	0.325	0	0.05	0.7
374800	1	1	1	0	0.15	0.425	0	0.1	0.7
375200	1	1	1	0	0.05	0.325	0	0.1	0.7
375600	1	1	1	0	0.05	0.325	0	0.1	0.6
376000	1	1	1	0	0.05	0.325	0	0.1	0.6
376400	1	1	1	0	0.05	0.35	0	0.15	0.6
376800	1	1	1	0	0.05	0.35	0	0.15	0.6
377200	1	1	1	0	0.05	0.425	0	0.15	0.6
377600	1	1	1	0	0.05	0.35	0	0.15	0.525
378000	1	1	1	0	0.05	0.35	0	0.1	0.425
378400	1	1	1	0	0.05	0.425	0	0.1	0.35
378800	1	1	1	0	0	0.425	0	0.05	0.325
379200	1	1	1	0	0	0.525	0	0.05	0.425
379600	1	1	1	0	0	0.6	0	0.05	0.425
380000	1	1	1	0	0	0.675	0	0.05	0.425
380400	1	1	1	0	0	0.675	0	0.05	0.425
380800	1	1	1	0	0	0.675	0	0.1	0.45
381200	1	1	1	0	0	0.675	0	0.15	0.55
381600	1	1	1	0	0	0.775	0	0.15	0.55
382000	1	1	1	0	0	0.8	0	0.25	0.65
382400	1	1	1	0	0	0.725	0	0.25	0.65
382800	1	1	1	0	0.1	0.725	0	0.25	0.575
383200	1	1	1	0	0.1	0.7	0	0.3	0.575
383600	1	1	1	0	0.1	0.625	0	0.3	0.65
384000	1	1	1	0	0.1	0.65	0	0.3	0.575
384400	1	1	1	0	0.1	0.55	0	0.25	0.475
384800	1	1	1	0	0.1	0.55	0	0.2	0.45
385200	1	1	1	0	0.1	0.575	0	0.15	0.35
385600	1	1	1	0	0.1	0.475	0	0.15	0.35
386000	1	1	1	0	0.1	0.45	0	0.05	0.325
386400	1	1	1	0	0.1	0.45	0	0.05	0.4
386800	1	1	1	0	0.05	0.45	0	0.05	0.4
387200	1	1	1	0	0.05	0.45	0	0	0.375
387600	1	1	1	0	0.15	0.55	0	0	0.3
388000	1	1	1	0	0.15	0.45	0	0	0.3
388400	1	1	1	0	0.15	0.45	0	0	0.4
388800	1	1	1	0	0.15	0.525	0	0	0.325
389200	1	1	1	0	0.15	0.425	0	0	0.325
389600	1	1	1	0	0.15	0.5	0	0	0.4
390000	1	1	1	0	0.15	0.425	0	0	0.425
390400	1	1	1	0	0.15	0.5	0	0	0.425
390800	1	1	1	0	0.1	0.4	0	0	0.425
391200	1	1	1	0	0.1	0.4	0	0	0.35
391600	1	1	1	0	0	0.3	0	0	0.45
392000	1	1	1	0	0	0.3	0	0	0.525
392400	1	1	1	0	0	0.4	0	0	0.425
392800	1	1	1	0	0.05	0.425	0	0	0.425
393200	1	1	1	0	0.05	0.425	0	0	0.525
393600	1	1	1	0	0.05	0.35	0	0	0.45
394000	1	1	1	0	0.05	0.425	0	0	0.425
394400	1	1	1	0	0.05	0.35	0	0	0.35
394800	1	1	1	0	0.05	0.45	0	0	0.425
395200	1	1	1	0	0.05	0.375	0	0	0.525
395600	1	1	1	0	0.05	0.45	0	0.05	0.525
396000	1	1	1	0	0.05	0.525	0	0.1	0.55
396400	1	1	1	0	0.05	0.425	0	0.1	0.55
396800	1	1	1	0	0	0.325	0	0.1	0.55
397200	1	1	1	0	0	0.4	0	0.1	0.525
397600	1	1	1	0	0	0.4	0	0.1	0.525
398000	1	1	1	0	0	0.4	0	0.1	0.45
398400	1	1	1	0	0	0.475	0	0.1	0.55
398800	1	1	1	0	0	0.475	0	0.1	0.55
399200	1	1	1	0	0	0.575	0	0.1	0.55
399600	1	1	1	0	0	0.5	0	0.05	0.525
400000	1	1	1	0	0	0.425	0	0	0.525

## Sheet: t2
0	0	0	0	0	0	0	0	0	0
400	0	0	0	0	0	1	0	0	0
800	0	0	0	0	0	1	0	0	0
1200	0	0	0	0	0	0.666667	0	0	0
1600	0	0	0	0	0.125	0.75	0	0	0
2000	0	0	0	0	0.3	0.8	0	0	0
2400	0	0	0	0	0.416667	0.833333	0	0	0
2800	0	0	0	0	0.357143	0.821429	0	0	0
3200	0	0	0	0	0.3125	0.84375	0	0	0
3600	0	0	0	0.0277778	0.388889	0.861111	0	0	0
4000	0	0	0	0.025	0.35	0.775	0	0	0
4400	0	0	0	0.025	0.35	0.75	0	0	0
4800	0	0	0	0.025	0.35	0.725	0	0	0
5200	0	0	0	0.025	0.45	0.825	0	0	0
5600	0	0	0	0.125	0.5	0.825	0	0	0
6000	0	0	0	0.125	0.45	0.825	0	0	0
6400	0	0	0	0.125	0.35	0.725	0	0	0
6800	0	0	0	0.125	0.35	0.75	0	0	0
7200	0	0	0	0.125	0.45	0.75	0	0	0
7600	0	0	0	0.1	0.35	0.65	0	0	0
8000	0	0	0	0.1	0.4	0.75	0	0	0
8400	0	0	0	0.1	0.4	0.775	0	0	0
8800	0	0	0	0.1	0.4	0.8	0	0	0
9200	0	0	0	0.1	0.3	0.8	0	0	0.1
9600	0	0	0	0	0.25	0.8	0	0	0.1
10000	0	0	0	0	0.2	0.775	0	0	0.2
10400	0	0	0	0	0.25	0.875	0	0	0.3
10800	0	0	0	0	0.25	0.875	0	0	0.4
11200	0	0	0	0	0.2	0.875	0	0	0.4
11600	0	0	0	0	0.2	0.95	0	0	0.4
12000	0	0	0	0	0.15	0.95	0	0	0.4
12400	0	0	0	0	0.2	0.95	0	0	0.4
12800	0	0	0	0	0.2	0.95	0	0	0.4
13200	0	0	0	0	0.2	0.925	0	0.1	0.4
13600	0	0	0	0.025	0.25	0.925	0	0.15	0.5
14000	0	0	0	0.025	0.25	0.925	0	0.15	0.4
14400	0	0	0	0.025	0.2	0.9	0	0.2	0.4
14800	0	0	0	0.025	0.2	0.9	0	0.2	0.4
15200	0	0	0	0.025	0.15	0.9	0	0.2	0.5
15600	0	0	0	0.025	0.15	0.825	0	0.3	0.6
16000	0	0	0	0.025	0.15	0.825	0	0.3	0.6
16400	0	0	0	0.025	0.1	0.825	0	0.3	0.7
16800	0	0	0	0.025	0.1	0.825	0	0.35	0.8
17200	0	0	0	0.025	0.1	0.825	0	0.25	0.775
17600	0	0	0	0	0	0.825	0	0.2	0.75
18000	0	0	0	0	0.1	0.85	0	0.2	0.85
18400	0	0	0	0	0.1	0.85	0	0.15	0.75
18800	0	0	0	0	0.1	0.85	0	0.15	0.75
19200	0	0	0	0	0.15	0.85	0	0.15	0.75
19600	0	0	0	0	0.15	0.925	0	0.05	0.725
20000	0	0	0	0	0.2	0.925	0	0.1	0.825
20400	0	0	0	0	0.2	0.825	0	0.15	0.825
20800	0	0	0	0	0.3	0.825	0	0.1	0.825
21200	0	0	0	0.1	0.4	0.85	0	0.15	0.85
21600	0	0	0	0.1	0.45	0.85	0	0.15	0.875
22000	0	0	0	0.1	0.4	0.85	0	0.25	0.875
22400	0	0	0	0.1	0.4	0.875	0.025	0.35	0.975
22800	0	0	0	0.1	0.4	0.775	0.05	0.45	0.975
23200	0	0	0	0.1	0.35	0.75	0.05	0.5	0.975
23600	0	0	0	0.1	0.4	0.775	0.05	0.5	0.975
24000	0	0	0	0.1	0.4	0.775	0.05	0.55	0.975
24400	0	0	0	0.1	0.45	0.875	0.05	0.5	0.95
24800	0	0	0	0.1	0.35	0.775	0.05	0.55	0.95
25200	0	0	0	0	0.3	0.775	0.05	0.55	0.95
25600	0	0	0	0	0.3	0.775	0.05	0.55	0.95
26000	0	0	0	0	0.25	0.75	0.05	0.45	0.95
26400	0	0	0	0	0.25	0.75	0.025	0.45	0.95
26800	0	0	0.075	0	0.25	0.85	0	0.45	0.95
27200	0	0	0.075	0	0.25	0.775	0.1	0.5	0.95
27600	0	0	0.15	0	0.25	0.775	0.2	0.6	0.975
28000	0	0.05	0.25	0	0.3	0.775	0.2	0.5	0.975
28400	0	0.05	0.325	0	0.25	0.775	0.2	0.6	1
28800	0	0.05	0.325	0	0.25	0.85	0.2	0.65	1
29200	0	0.1	0.425	0	0.2	0.75	0.225	0.7	1
29600	0	0.1	0.5	0.025	0.25	0.75	0.325	0.8	1
30000	0	0.1	0.6	0.025	0.3	0.775	0.425	0.9	1
30400	0	0.1	0.6	0.125	0.4	0.775	0.425	0.85	1
30800	0	0.1	0.525	0.125	0.45	0.775	0.425	0.75	1
31200	0	0.1	0.525	0.125	0.45	0.85	0.325	0.75	1
31600	0	0.1	0.55	0.125	0.5	0.85	0.25	0.75	1
32000	0	0.05	0.55	0.125	0.45	0.85	0.25	0.85	1
32400	0	0.05	0.575	0.125	0.45	0.825	0.25	0.75	1
32800	0	0.05	0.675	0.125	0.45	0.825	0.25	0.7	1
33200	0	0.05	0.675	0.125	0.45	0.825	0.25	0.7	1
33600	0	0.1	0.7	0.1	0.4	0.825	0.25	0.7	1
34000	0	0.1	0.7	0.1	0.45	0.825	0.15	0.65	1
34400	0	0.15	0.8	0.1	0.45	0.825	0.15	0.7	1
34800	0	0.25	0.9	0.1	0.5	0.825	0.15	0.8	1
35200	0	0.3	1	0.1	0.6	0.85	0.25	0.8	1
35600	0	0.3	1	0.1	0.5	0.85	0.25	0.8	1
36000	0	0.35	1	0.1	0.45	0.85	0.25	0.7	0.975
36400	0	0.45	1	0.1	0.45	0.875	0.25	0.7	0.975
36800	0.1	0.55	1	0.1	0.45	0.875	0.25	0.7	0.975
37200	0.125	0.6	1	0.1	0.5	0.975	0.225	0.7	0.975
37600	0.125	0.65	1	0.1	0.5	0.975	0.125	0.65	0.975
38000	0.225	0.75	1	0.1	0.4	0.95	0.15	0.7	0.975
38400	0.325	0.8	1	0	0.35	0.95	0.15	0.7	0.975
38800	0.425	0.8	1	0	0.25	0.85	0.25	0.7	0.975
39200	0.425	0.85	1	0	0.2	0.85	0.25	0.7	0.975
39600	0.525	0.95	1	0	0.3	0.85	0.325	0.7	0.975
40000	0.525	1	1	0	0.35	0.85	0.425	0.8	1
40400	0.625	1	1	0	0.45	0.85	0.45	0.9	1
40800	0.55	1	1	0	0.45	0.875	0.45	0.9	1
41200	0.55	1	1	0	0.4	0.85	0.475	0.9	1
41600	0.65	1	1	0	0.4	0.85	0.575	0.95	1
42000	0.575	1	1	0	0.45	0.875	0.575	0.95	1
42400	0.575	1	1	0	0.45	0.875	0.6	0.95	1
42800	0.575	1	1	0	0.5	0.975	0.6	0.95	1
43200	0.6	1	1	0	0.45	0.975	0.6	0.95	1
43600	0.525	1	1	0	0.4	0.975	0.525	0.95	1
44000	0.625	1	1	0	0.35	0.975	0.525	0.95	1
44400	0.625	1	1	0	0.3	0.975	0.6	0.95	1
44800	0.7	1	1	0.025	0.4	0.975	0.6	0.95	1
45200	0.775	1	1	0.05	0.5	1	0.575	0.85	0.975
45600	0.775	1	1	0.15	0.55	1	0.575	0.85	0.975
46000	0.85	1	1	0.15	0.5	0.975	0.575	0.85	0.975
46400	0.85	1	1	0.15	0.5	0.975	0.575	0.85	0.975
46800	0.85	1	1	0.15	0.55	0.975	0.5	0.85	0.975
47200	0.925	1	1	0.15	0.6	0.975	0.5	0.85	0.975
47600	1	1	1	0.15	0.55	0.975	0.575	0.85	0.975
48000	1	1	1	0.15	0.55	0.975	0.575	0.85	0.975
48400	1	1	1	0.15	0.5	0.95	0.575	0.85	0.975
48800	1	1	1	0.125	0.45	0.95	0.675	0.9	0.975
49200	1	1	1	0.1	0.45	0.95	0.7	1	1
49600	1	1	1	0	0.35	0.925	0.625	1	1
50000	1	1	1	0	0.35	0.95	0.625	1	1
50400	1	1	1	0	0.3	0.925	0.7	1	1
50800	1	1	1	0	0.2	0.825	0.7	1	1
51200	1	1	1	0	0.25	0.825	0.7	1	1
51600	1	1	1	0	0.25	0.8	0.7	1	1
52000	1	1	1	0	0.25	0.775	0.6	1	1
52400	1	1	1	0	0.25	0.7	0.6	1	1
52800	1	1	1	0	0.25	0.7	0.525	1	1
53200	1	1	1	0	0.15	0.675	0.525	1	1
53600	1	1	1	0	0.2	0.7	0.525	1	1
54000	1	1	1	0	0.2	0.675	0.5	1	1
54400	1	1	1	0.1	0.3	0.7	0.5	1	1
54800	1	1	1	0.1	0.3	0.8	0.575	1	1
55200	1	1	1	0.1	0.25	0.8	0.575	1	1
55600	1	1	1	0.1	0.35	0.825	0.475	1	1
56000	1	1	1	0.1	0.35	0.825	0.475	1	1
56400	1	1	1	0.1	0.4	0.925	0.375	1	1
56800	1	1	1	0.1	0.35	0.925	0.375	1	1
57200	1	1	1	0.125	0.45	0.95	0.45	1	1
57600	1	1	1	0.125	0.45	0.95	0.45	1	1
58000	1	1	1	0.125	0.45	0.975	0.45	1	1
58400	1	1	1	0.025	0.35	0.975	0.35	0.95	1
58800	1	1	1	0.125	0.45	0.975	0.35	0.95	1
59200	1	1	1	0.125	0.4	0.875	0.35	0.95	1
59600	1	1	1	0.125	0.3	0.85	0.35	0.95	1
60000	1	1	1	0.125	0.35	0.875	0.45	0.95	1
60400	1	1	1	0.125	0.3	0.775	0.55	0.95	1
60800	1	1	1	0.125	0.3	0.775	0.625	0.95	1
61200	1	1	1	0.1	0.2	0.775	0.625	0.95	1
61600	1	1	1	0.1	0.15	0.775	0.7	0.95	1
62000	1	1	1	0.1	0.15	0.775	0.725	0.95	1
62400	1	1	1	0.1	0.15	0.75	0.75	1	1
62800	1	1	1	0	0.15	0.75	0.75	1	1
63200	1	1	1	0	0.25	0.85	0.75	1	1
63600	1	1	1	0	0.3	0.875	0.85	1	1
64000	1	1	1	0	0.25	0.875	0.775	1	1
64400	1	1	1	0	0.3	0.975	0.675	1	1
64800	1	1	1	0	0.4	0.975	0.575	1	1
65200	1	1	1	0	0.5	0.975	0.575	1	1
65600	1	1	1	0.025	0.6	0.975	0.575	1	1
66000	1	1	1	0.05	0.7	0.975	0.65	1	1
66400	1	1	1	0.05	0.7	0.975	0.725	1	1
66800	1	1	1	0.05	0.7	0.975	0.725	1	1
67200	1	1	1	0.05	0.7	0.975	0.725	1	1
67600	1	1	1	0.05	0.75	0.975	0.625	1	1
68000	1	1	1	0.05	0.75	0.975	0.7	1	1
68400	1	1	1	0.05	0.75	0.975	0.7	1	1
68800	1	1	1	0.05	0.65	0.975	0.8	1	1
69200	1	1	1	0.05	0.55	0.975	0.8	1	1
69600	1	1	1	0.025	0.45	0.975	0.7	1	1
70000	1	1	1	0	0.35	0.975	0.7	1	1
70400	1	1	1	0	0.4	1	0.7	1	1
70800	1	1	1	0	0.3	1	0.6	1	1
71200	1	1	1	0	0.25	1	0.5	1	1
71600	1	1	1	0	0.15	1	0.5	1	1
72000	1	1	1	0	0.15	1	0.5	1	1
72400	1	1	1	0	0.15	1	0.525	1	1
72800	1	1	1	0	0.15	0.9	0.525	1	1
73200	1	1	1	0	0.15	0.9	0.425	1	1
73600	1	1	1	0	0.15	0.875	0.525	1	1
74000	1	1	1	0	0.15	0.775	0.525	1	1
74400	1	1	1	0.1	0.2	0.775	0.525	1	1
74800	1	1	1	0.1	0.3	0.775	0.625	1	1
75200	1	1	1	0.1	0.25	0.775	0.65	1	1
75600	1	1	1	0.1	0.25	0.775	0.65	1	1
76000	1	1	1	0.1	0.25	0.775	0.65	1	1
76400	1	1	1	0.1	0.2	0.675	0.725	1	1
76800	1	1	1	0.1	0.25	0.775	0.625	1	1
77200	1	1	1	0.1	0.3	0.775	0.725	1	1
77600	1	1	1	0.1	0.3	0.8	0.725	1	1
78000	1	1	1	0.1	0.3	0.8	0.65	1	1
78400	1	1	1	0	0.2	0.775	0.575	1	1
78800	1	1	1	0.025	0.2	0.775	0.475	0.95	1
79200	1	1	1	0.125	0.3	0.775	0.55	0.95	1
79600	1	1	1	0.125	0.35	0.775	0.575	0.95	1
80000	1	1	1	0.125	0.45	0.775	0.575	0.95	1
80400	1	1	1	0.125	0.45	0.85	0.5	0.95	1
80800	1	1	1	0.125	0.4	0.75	0.6	0.95	1
81200	1	1	1	0.125	0.45	0.75	0.525	0.95	1
81600	1	1	1	0.125	0.55	0.75	0.425	0.95	1
82000	1	1	1	0.125	0.65	0.85	0.4	0.95	1
82400	1	1	1	0.125	0.7	0.875	0.375	0.95	1
82800	1	1	1	0.125	0.7	0.875	0.475	1	1
83200	1	1	1	0.025	0.6	0.875	0.475	1	1
83600	1	1	1	0.025	0.55	0.85	0.55	1	1
84000	1	1	1	0.025	0.45	0.825	0.55	1	1
84400	1	1	1	0.025	0.45	0.85	0.55	1	1
84800	1	1	1	0.05	0.55	0.95	0.55	1	1
85200	1	1	1	0.05	0.5	0.95	0.525	1	1
85600	1	1	1	0.05	0.4	0.925	0.525	1	1
86000	1	1	1	0.05	0.3	0.925	0.625	1	1
86400	1	1	1	0.15	0.35	0.925	0.725	1	1
86800	1	1	1	0.125	0.3	0.925	0.725	1	1
87200	1	1	1	0.225	0.4	0.925	0.725	1	1
87600	1	1	1	0.25	0.5	0.95	0.725	1	1
88000	1	1	1	0.25	0.5	0.875	0.725	1	1
88400	1	1	1	0.25	0.5	0.875	0.725	1	1
88800	1	1	1	0.225	0.4	0.85	0.625	0.9	1
89200	1	1	1	0.225	0.35	0.825	0.725	0.9	1
89600	1	1	1	0.325	0.45	0.85	0.825	0.9	1
90000	1	1	1	0.425	0.55	0.85	0.825	0.9	1
90400	1	1	1	0.35	0.55	0.85	0.825	0.9	1
90800	1	1	1	0.35	0.5	0.85	0.825	0.9	1
91200	1	1	1	0.25	0.4	0.825	0.825	0.9	1
91600	1	1	1	0.225	0.3	0.8	0.825	0.9	1
92000	1	1	1	0.325	0.4	0.9	0.75	0.9	1
92400	1	1	1	0.325	0.4	0.8	0.75	0.9	1
92800	1	1	1	0.325	0.4	0.8	0.775	1	1
93200	1	1	1	0.325	0.5	0.825	0.7	1	1
93600	1	1	1	0.225	0.4	0.8	0.7	1	1
94000	1	1	1	0.125	0.3	0.775	0.625	1	1
94400	1	1	1	0.1	0.3	0.775	0.625	1	1
94800	1	1	1	0.1	0.3	0.75	0.625	1	1
95200	1	1	1	0.1	0.4	0.775	0.55	1	1
95600	1	1	1	0.1	0.4	0.775	0.55	1	1
96000	1	1	1	0	0.35	0.775	0.625	1	1
96400	1	1	1	0	0.35	0.85	0.6	1	1
96800	1	1	1	0	0.35	0.875	0.675	1	1
97200	1	1	1	0	0.25	0.875	0.75	1	1
97600	1	1	1	0	0.25	0.8	0.65	1	1
98000	1	1	1	0.1	0.35	0.825	0.65	1	1
98400	1	1	1	0.1	0.3	0.825	0.65	1	1
98800	1	1	1	0.1	0.3	0.75	0.55	0.95	1
99200	1	1	1	0.1	0.2	0.75	0.55	0.95	1
99600	1	1	1	0.1	0.2	0.75	0.45	0.95	1
100000	1	1	1	0.1	0.15	0.725	0.35	0.95	1
100400	1	1	1	0.1	0.25	0.75	0.35	0.95	1
100800	1	1	1	0.1	0.25	0.75	0.275	0.95	1
101200	1	1	1	0.1	0.25	0.75	0.2	0.95	1
101600	1	1	1	0.1	0.25	0.85	0.3	0.95	1
102000	1	1	1	0	0.15	0.825	0.375	0.95	1
102400	1	1	1	0	0.2	0.825	0.375	0.95	1
102800	1	1	1	0	0.2	0.925	0.475	1	1
103200	1	1	1	0	0.3	0.925	0.475	1	1
103600	1	1	1	0	0.3	0.95	0.5	1	1
104000	1	1	1	0.025	0.4	0.975	0.5	1	1
104400	1	1	1	0.025	0.4	0.975	0.5	1	1
104800	1	1	1	0.025	0.4	0.95	0.5	1	1
105200	1	1	1	0.025	0.4	0.95	0.5	1	1
105600	1	1	1	0.025	0.4	0.95	0.5	1	1
106000	1	1	1	0.025	0.4	0.875	0.5	1	1
106400	1	1	1	0.025	0.3	0.85	0.5	1	1
106800	1	1	1	0.025	0.3	0.85	0.4	0.95	1
107200	1	1	1	0.025	0.25	0.85	0.475	0.95	1
107600	1	1	1	0.025	0.3	0.85	0.55	0.95	1
108000	1	1	1	0	0.2	0.85	0.55	0.95	1
108400	1	1	1	0	0.15	0.85	0.65	0.95	1
108800	1	1	1	0	0.15	0.85	0.65	0.95	1
109200	1	1	1	0	0.15	0.85	0.65	0.95	1
109600	1	1	1	0	0.15	0.75	0.65	0.95	1
110000	1	1	1	0	0.15	0.825	0.65	0.95	1
110400	1	1	1	0	0.2	0.85	0.65	0.95	1
110800	1	1	1	0	0.25	0.85	0.75	1	1
111200	1	1	1	0	0.3	0.85	0.75	1	1
111600	1	1	1	0	0.35	0.85	0.65	0.95	1
112000	1	1	1	0	0.35	0.85	0.675	0.95	1
112400	1	1	1	0	0.4	0.85	0.675	0.95	1
112800	1	1	1	0	0.5	0.875	0.675	0.95	1
113200	1	1	1	0	0.5	0.875	0.675	0.95	1
113600	1	1	1	0	0.5	0.975	0.6	0.95	1
114000	1	1	1	0	0.5	0.9	0.525	0.95	1
114400	1	1	1	0	0.45	0.9	0.45	0.95	1
114800	1	1	1	0	0.4	0.8	0.45	0.95	1
115200	1	1	1	0	0.3	0.8	0.375	0.95	1
115600	1	1	1	0	0.2	0.775	0.4	1	1
116000	1	1	1	0	0.25	0.775	0.475	1	1
116400	1	1	1	0	0.15	0.775	0.475	1	1
116800	1	1	1	0	0.15	0.775	0.55	1	1
117200	1	1	1	0	0.2	0.775	0.625	1	1
117600	1	1	1	0	0.25	0.775	0.7	1	1
118000	1	1	1	0	0.25	0.775	0.775	1	1
118400	1	1	1	0	0.25	0.75	0.75	1	1
118800	1	1	1	0	0.35	0.85	0.75	1	1
119200	1	1	1	0	0.35	0.825	0.725	1	1
119600	1	1	1	0	0.4	0.85	0.8	1	1
120000	1	1	1	0.025	0.45	0.85	0.7	1	1
120400	1	1	1	0.025	0.45	0.85	0.625	1	1
120800	1	1	1	0.025	0.35	0.85	0.55	1	1
121200	1	1	1	0.025	0.4	0.85	0.55	1	1
121600	1	1	1	0.025	0.35	0.825	0.55	1	1
122000	1	1	1	0.025	0.35	0.825	0.55	1	1
122400	1	1	1	0.025	0.35	0.85	0.575	1	1
122800	1	1	1	0.025	0.35	0.85	0.475	1	1
123200	1	1	1	0.025	0.35	0.875	0.575	1	1
123600	1	1	1	0.025	0.3	0.775	0.575	1	1
124000	1	1	1	0.025	0.3	0.775	0.675	1	1
124400	1	1	1	0.025	0.35	0.775	0.675	1	1
124800	1	1	1	0.025	0.35	0.75	0.75	1	1
125200	1	1	1	0.05	0.35	0.75	0.75	1	1
125600	1	1	1	0.05	0.4	0.775	0.75	1	1
126000	1	1	1	0.05	0.4	0.85	0.675	1	1
126400	1	1	1	0.05	0.4	0.85	0.75	1	1
126800	1	1	1	0.075	0.4	0.85	0.775	1	1
127200	1	1	1	0.075	0.4	0.825	0.775	1	1
127600	1	1	1	0.075	0.4	0.825	0.675	1	1
128000	1	1	1	0.05	0.3	0.825	0.6	1	1
128400	1	1	1	0.05	0.35	0.825	0.575	1	1
128800	1	1	1	0.05	0.45	0.85	0.575	1	1
129200	1	1	1	0.025	0.45	0.85	0.475	1	1
129600	1	1	1	0.025	0.45	0.85	0.475	1	1
130000	1	1	1	0.025	0.55	0.875	0.55	1	1
130400	1	1	1	0.025	0.55	0.875	0.45	1	1
130800	1	1	1	0	0.5	0.875	0.45	1	1
131200	1	1	1	0	0.55	0.9	0.45	1	1
131600	1	1	1	0.025	0.65	1	0.475	1	1
132000	1	1	1	0.025	0.65	0.975	0.475	1	1
132400	1	1	1	0.025	0.65	0.975	0.575	1	1
132800	1	1	1	0.025	0.55	0.975	0.5	1	1
133200	1	1	1	0.025	0.45	0.975	0.6	1	1
133600	1	1	1	0.025	0.4	0.95	0.6	1	1
134000	1	1	1	0.025	0.35	0.95	0.525	1	1
134400	1	1	1	0.025	0.35	0.95	0.625	1	1
134800	1	1	1	0.025	0.3	0.95	0.6	1	1
135200	1	1	1	0.025	0.3	0.95	0.525	1	1
135600	1	1	1	0	0.3	0.95	0.6	1	1
136000	1	1	1	0	0.4	0.975	0.675	1	1
136400	1	1	1	0	0.3	0.975	0.575	1	1
136800	1	1	1	0	0.35	0.975	0.575	1	1
137200	1	1	1	0	0.4	0.975	0.575	1	1
137600	1	1	1	0	0.4	1	0.475	0.95	1
138000	1	1	1	0	0.45	1	0.475	0.95	1
138400	1	1	1	0	0.45	0.9	0.475	0.95	1
138800	1	1	1	0	0.45	0.9	0.475	0.9	1
139200	1	1	1	0	0.5	0.9	0.45	0.9	1
139600	1	1	1	0	0.4	0.8	0.45	0.9	1
140000	1	1	1	0	0.4	0.8	0.45	0.9	1
140400	1	1	1	0	0.5	0.8	0.475	0.9	1
140800	1	1	1	0	0.45	0.775	0.475	0.9	1
141200	1	1	1	0	0.5	0.775	0.4	0.9	1
141600	1	1	1	0	0.6	0.775	0.425	0.95	1
142000	1	1	1	0	0.5	0.775	0.5	0.95	1
142400	1	1	1	0	0.5	0.775	0.5	0.95	1
142800	1	1	1	0	0.5	0.675	0.6	1	1
143200	1	1	1	0	0.45	0.675	0.625	1	1
143600	1	1	1	0	0.45	0.775	0.625	1	1
144000	1	1	1	0.025	0.45	0.775	0.625	1	1
144400	1	1	1	0.025	0.45	0.775	0.7	1	1
144800	1	1	1	0.025	0.45	0.8	0.775	1	1
145200	1	1	1	0.025	0.35	0.8	0.85	1	1
145600	1	1	1	0.025	0.3	0.8	0.85	1	1
146000	1	1	1	0.025	0.3	0.8	0.775	1	1
146400	1	1	1	0.025	0.4	0.9	0.7	1	1
146800	1	1	1	0.025	0.45	1	0.7	1	1
147200	1	1	1	0.025	0.45	1	0.7	1	1
147600	1	1	1	0.025	0.5	1	0.625	1	1
148000	1	1	1	0	0.5	1	0.55	1	1
148400	1	1	1	0	0.45	1	0.55	1	1
148800	1	1	1	0	0.45	1	0.475	1	1
149200	1	1	1	0	0.55	1	0.375	1	1
149600	1	1	1	0	0.55	1	0.35	1	1
150000	1	1	1	0	0.6	1	0.425	1	1
150400	1	1	1	0	0.55	1	0.425	1	1
150800	1	1	1	0	0.55	1	0.425	1	1
151200	1	1	1	0	0.5	1	0.5	1	1
151600	1	1	1	0	0.45	1	0.575	1	1
152000	1	1	1	0	0.35	0.975	0.55	0.95	1
152400	1	1	1	0	0.4	0.975	0.55	0.95	1
152800	1	1	1	0	0.4	0.875	0.625	0.95	1
153200	1	1	1	0	0.35	0.875	0.65	0.95	1
153600	1	1	1	0	0.4	0.875	0.75	0.95	1
154000	1	1	1	0	0.35	0.85	0.75	0.95	1
154400	1	1	1	0	0.3	0.825	0.725	0.95	1
154800	1	1	1	0.025	0.35	0.825	0.725	0.95	1
155200	1	1	1	0.05	0.45	0.825	0.725	0.95	1
155600	1	1	1	0.075	0.55	0.825	0.65	0.95	1
156000	1	1	1	0.075	0.65	0.85	0.75	1	1
156400	1	1	1	0.075	0.6	0.85	0.75	1	1
156800	1	1	1	0.075	0.6	0.925	0.75	1	1
157200	1	1	1	0.075	0.6	0.925	0.825	1	1
157600	1	1	1	0.075	0.5	0.925	0.825	1	1
158000	1	1	1	0.1	0.6	0.95	0.75	1	1
158400	1	1	1	0.125	0.7	0.975	0.85	1	1
158800	1	1	1	0.1	0.7	0.975	0.85	1	1
159200	1	1	1	0.075	0.6	0.95	0.85	1	1
159600	1	1	1	0.075	0.6	0.95	0.85	1	1
160000	1	1	1	0.075	0.5	0.95	0.85	1	1
160400	1	1	1	0.075	0.5	0.95	0.85	1	1
160800	1	1	1	0.075	0.5	0.975	0.85	1	1
161200	1	1	1	0.075	0.45	0.875	0.85	1	1
161600	1	1	1	0.075	0.5	0.875	0.85	1	1
162000	1	1	1	0.05	0.4	0.875	0.925	1	1
162400	1	1	1	0.025	0.4	0.875	0.925	1	1
162800	1	1	1	0.05	0.4	0.875	0.925	1	1
163200	1	1	1	0.15	0.5	0.9	0.85	1	1
163600	1	1	1	0.125	0.5	0.9	0.925	1	1
164000	1	1	1	0.125	0.6	0.9	0.825	0.95	1
164400	1	1	1	0.15	0.65	0.9	0.725	0.95	1
164800	1	1	1	0.15	0.75	0.9	0.725	0.95	1
165200	1	1	1	0.25	0.85	1	0.725	0.95	1
165600	1	1	1	0.25	0.85	1	0.725	0.95	1
166000	1	1	1	0.25	0.85	1	0.725	0.95	1
166400	1	1	1	0.275	0.85	1	0.725	0.95	1
166800	1	1	1	0.25	0.85	1	0.725	0.95	1
167200	1	1	1	0.15	0.75	1	0.7	0.95	1
167600	1	1	1	0.15	0.75	1	0.625	0.95	1
168000	1	1	1	0.175	0.75	1	0.725	1	1
168400	1	1	1	0.15	0.7	1	0.825	1	1
168800	1	1	1	0.15	0.6	0.9	0.825	1	1
169200	1	1	1	0.05	0.55	0.9	0.825	1	1
169600	1	1	1	0.05	0.6	0.9	0.825	1	1
170000	1	1	1	0.05	0.7	0.9	0.825	1	1
170400	1	1	1	0.05	0.7	0.9	0.825	1	1
170800	1	1	1	0.05	0.65	0.9	0.75	1	1
171200	1	1	1	0.15	0.75	0.9	0.85	1	1
171600	1	1	1	0.15	0.75	0.9	0.925	1	1
172000	1	1	1	0.125	0.65	0.8	0.925	1	1
172400	1	1	1	0.125	0.6	0.8	0.925	1	1
172800	1	1	1	0.15	0.7	0.9	0.825	0.9	1
173200	1	1	1	0.15	0.65	0.875	0.825	0.9	1
173600	1	1	1	0.15	0.6	0.875	0.725	0.85	1
174000	1	1	1	0.175	0.6	0.875	0.725	0.85	1
174400	1	1	1	0.15	0.6	0.875	0.65	0.85	1
174800	1	1	1	0.175	0.65	0.875	0.65	0.85	1
175200	1	1	1	0.075	0.55	0.85	0.55	0.85	1
175600	1	1	1	0.075	0.55	0.85	0.45	0.8	1
176000	1	1	1	0.075	0.55	0.925	0.35	0.8	1
176400	1	1	1	0.175	0.65	0.925	0.35	0.8	1
176800	1	1	1	0.15	0.6	0.925	0.375	0.9	1
177200	1	1	1	0.15	0.65	0.95	0.3	0.9	1
177600	1	1	1	0.15	0.65	0.95	0.3	0.95	1
178000	1	1	1	0.125	0.55	0.95	0.225	0.95	1
178400	1	1	1	0.125	0.45	0.95	0.3	0.95	1
178800	1	1	1	0.1	0.35	0.85	0.375	0.95	1
179200	1	1	1	0.1	0.4	0.875	0.475	0.95	1
179600	1	1	1	0.1	0.4	0.875	0.575	1	1
180000	1	1	1	0.1	0.4	0.9	0.6	1	1
180400	1	1	1	0.025	0.4	0.9	0.5	0.9	1
180800	1	1	1	0.025	0.45	0.9	0.575	0.9	1
181200	1	1	1	0.025	0.45	0.9	0.55	0.9	1
181600	1	1	1	0.05	0.5	0.9	0.65	0.9	1
182000	1	1	1	0.05	0.6	0.9	0.725	0.9	1
182400	1	1	1	0.075	0.7	0.9	0.65	0.9	1
182800	1	1	1	0.075	0.7	1	0.65	0.9	1
183200	1	1	1	0.1	0.75	1	0.65	0.9	1
183600	1	1	1	0.1	0.7	1	0.575	0.9	1
184000	1	1	1	0.1	0.75	1	0.575	0.9	1
184400	1	1	1	0.075	0.65	1	0.6	1	1
184800	1	1	1	0.075	0.55	0.975	0.6	1	1
185200	1	1	1	0.075	0.6	0.975	0.7	1	1
185600	1	1	1	0.05	0.6	0.975	0.7	1	1
186000	1	1	1	0.05	0.55	0.975	0.7	1	1
186400	1	1	1	0.025	0.55	0.975	0.7	1	1
186800	1	1	1	0.025	0.55	0.875	0.7	1	1
187200	1	1	1	0	0.45	0.85	0.7	1	1
187600	1	1	1	0	0.45	0.85	0.775	1	1
188000	1	1	1	0	0.5	0.85	0.775	1	1
188400	1	1	1	0	0.5	0.85	0.85	1	1
188800	1	1	1	0	0.6	0.875	0.85	1	1
189200	1	1	1	0	0.5	0.85	0.85	1	1
189600	1	1	1	0	0.4	0.75	0.75	1	1
190000	1	1	1	0	0.35	0.75	0.675	1	1
190400	1	1	1	0.025	0.35	0.75	0.75	1	1
190800	1	1	1	0.025	0.45	0.85	0.75	1	1
191200	1	1	1	0.025	0.5	0.875	0.675	1	1
191600	1	1	1	0.025	0.45	0.775	0.675	1	1
192000	1	1	1	0.025	0.35	0.75	0.65	1	1
192400	1	1	1	0.025	0.45	0.75	0.65	1	1
192800	1	1	1	0.025	0.4	0.75	0.65	1	1
193200	1	1	1	0.025	0.45	0.775	0.65	1	1
193600	1	1	1	0.025	0.55	0.875	0.75	1	1
194000	1	1	1	0.025	0.55	0.875	0.825	1	1
194400	1	1	1	0	0.45	0.875	0.825	1	1
194800	1	1	1	0.025	0.45	0.875	0.75	1	1
195200	1	1	1	0.025	0.4	0.85	0.75	1	1
195600	1	1	1	0.025	0.45	0.95	0.65	0.9	1
196000	1	1	1	0.05	0.55	0.975	0.75	0.9	1
196400	1	1	1	0.05	0.45	0.975	0.75	0.9	1
196800	1	1	1	0.05	0.4	0.975	0.75	0.9	1
197200	1	1	1	0.15	0.45	0.975	0.75	0.9	1
197600	1	1	1	0.15	0.4	0.975	0.75	0.9	1
198000	1	1	1	0.15	0.4	0.975	0.75	0.9	1
198400	1	1	1	0.15	0.45	0.975	0.75	0.9	1
198800	1	1	1	0.225	0.45	0.975	0.75	0.9	1
199200	1	1	1	0.225	0.45	0.975	0.825	0.9	1
199600	1	1	1	0.225	0.45	0.975	0.925	1	1
200000	1	1	1	0.2	0.35	0.975	0.85	1	1
200400	1	1	1	0.2	0.35	0.975	0.75	1	1
200800	1	1	1	0.2	0.45	0.975	0.75	1	1
201200	1	1	1	0.1	0.4	0.975	0.675	1	1
201600	1	1	1	0.1	0.4	0.975	0.675	1	1
202000	1	1	1	0.125	0.5	0.975	0.675	1	1
202400	1	1	1	0.125	0.5	0.975	0.6	1	1
202800	1	1	1	0.025	0.5	0.975	0.675	1	1
203200	1	1	1	0.025	0.55	1	0.675	1	1
203600	1	1	1	0.025	0.5	0.9	0.675	1	1
204000	1	1	1	0.025	0.55	0.9	0.675	1	1
204400	1	1	1	0.025	0.6	0.9	0.7	1	1
204800	1	1	1	0.025	0.5	0.875	0.7	1	1
205200	1	1	1	0.05	0.55	0.875	0.775	1	1
205600	1	1	1	0.05	0.5	0.875	0.775	1	1
206000	1	1	1	0.025	0.4	0.775	0.775	1	1
206400	1	1	1	0.025	0.4	0.775	0.75	1	1
206800	1	1	1	0.025	0.3	0.675	0.75	1	1
207200	1	1	1	0.025	0.3	0.675	0.75	1	1
207600	1	1	1	0.025	0.35	0.775	0.75	1	1
208000	1	1	1	0.025	0.4	0.775	0.825	1	1
208400	1	1	1	0.025	0.35	0.775	0.9	1	1
208800	1	1	1	0.025	0.45	0.8	0.9	1	1
209200	1	1	1	0	0.35	0.8	0.8	1	1
209600	1	1	1	0	0.45	0.8	0.725	1	1
210000	1	1	1	0	0.55	0.9	0.725	1	1
210400	1	1	1	0.1	0.6	0.9	0.825	1	1
210800	1	1	1	0.1	0.6	1	0.75	1	1
211200	1	1	1	0.1	0.55	0.975	0.675	1	1
211600	1	1	1	0.1	0.6	0.975	0.675	1	1
212000	1	1	1	0.1	0.5	0.975	0.6	1	1
212400	1	1	1	0.1	0.6	0.975	0.6	1	1
212800	1	1	1	0.125	0.6	0.975	0.6	1	1
213200	1	1	1	0.15	0.7	0.975	0.7	1	1
213600	1	1	1	0.15	0.7	0.975	0.775	1	1
214000	1	1	1	0.15	0.65	0.975	0.775	1	1
214400	1	1	1	0.05	0.55	0.975	0.775	1	1
214800	1	1	1	0.05	0.6	0.975	0.85	1	1
215200	1	1	1	0.05	0.7	1	0.925	1	1
215600	1	1	1	0.075	0.7	1	0.825	1	1
216000	1	1	1	0.075	0.75	1	0.9	1	1
216400	1	1	1	0.175	0.75	1	0.9	1	1
216800	1	1	1	0.15	0.7	1	0.8	1	1
217200	1	1	1	0.125	0.6	0.975	0.8	1	1
217600	1	1	1	0.125	0.55	0.975	0.8	1	1
218000	1	1	1	0.225	0.6	0.975	0.8	1	1
218400	1	1	1	0.225	0.6	0.95	0.7	1	1
218800	1	1	1	0.225	0.6	0.95	0.7	1	1
219200	1	1	1	0.225	0.5	0.95	0.7	1	1
219600	1	1	1	0.2	0.5	0.95	0.8	1	1
220000	1	1	1	0.225	0.55	0.95	0.725	1	1
220400	1	1	1	0.125	0.45	0.925	0.725	1	1
220800	1	1	1	0.125	0.45	0.925	0.725	1	1
221200	1	1	1	0.125	0.5	0.95	0.725	1	1
221600	1	1	1	0.125	0.5	0.95	0.65	1	1
222000	1	1	1	0.025	0.5	0.95	0.575	1	1
222400	1	1	1	0.025	0.6	0.975	0.675	1	1
222800	1	1	1	0.025	0.65	0.975	0.6	1	1
223200	1	1	1	0.025	0.75	0.975	0.6	1	1
223600	1	1	1	0.025	0.75	0.975	0.6	1	1
224000	1	1	1	0	0.65	0.95	0.675	1	1
224400	1	1	1	0	0.65	0.875	0.675	1	1
224800	1	1	1	0	0.6	0.875	0.675	1	1
225200	1	1	1	0	0.55	0.875	0.575	1	1
225600	1	1	1	0	0.6	0.875	0.575	1	1
226000	1	1	1	0	0.5	0.875	0.575	1	1
226400	1	1	1	0	0.45	0.875	0.5	1	1
226800	1	1	1	0	0.45	0.875	0.475	1	1
227200	1	1	1	0	0.45	0.875	0.475	1	1
227600	1	1	1	0	0.4	0.875	0.475	1	1
228000	1	1	1	0.025	0.5	0.9	0.375	0.95	1
228400	1	1	1	0.05	0.6	1	0.375	0.95	1
228800	1	1	1	0.05	0.6	0.9	0.475	0.95	1
229200	1	1	1	0.05	0.6	0.875	0.5	0.95	1
229600	1	1	1	0.05	0.6	0.875	0.475	0.95	1
230000	1	1	1	0.05	0.6	0.875	0.475	0.95	1
230400	1	1	1	0.05	0.6	0.875	0.55	0.95	1
230800	1	1	1	0.05	0.55	0.875	0.65	0.95	1
231200	1	1	1	0.05	0.45	0.85	0.55	0.95	1
231600	1	1	1	0.05	0.45	0.85	0.55	0.95	1
232000	1	1	1	0.05	0.45	0.85	0.65	1	1
232400	1	1	1	0.025	0.4	0.85	0.575	1	1
232800	1	1	1	0.025	0.4	0.95	0.575	1	1
233200	1	1	1	0.025	0.45	0.975	0.65	1	1
233600	1	1	1	0.025	0.35	0.975	0.75	1	1
234000	1	1	1	0.025	0.45	0.975	0.75	1	1
234400	1	1	1	0.025	0.4	0.975	0.675	1	1
234800	1	1	1	0.025	0.4	0.975	0.575	0.95	1
235200	1	1	1	0.025	0.4	1	0.675	0.95	1
235600	1	1	1	0.025	0.35	0.9	0.6	0.95	1
236000	1	1	1	0	0.25	0.875	0.5	0.95	1
236400	1	1	1	0	0.25	0.875	0.5	0.95	1
236800	1	1	1	0	0.35	0.875	0.425	0.95	1
237200	1	1	1	0	0.3	0.875	0.425	0.95	1
237600	1	1	1	0	0.3	0.875	0.425	0.95	1
238000	1	1	1	0.1	0.3	0.875	0.5	0.95	1
238400	1	1	1	0.2	0.4	0.875	0.575	0.95	1
238800	1	1	1	0.225	0.45	0.875	0.675	1	1
239200	1	1	1	0.225	0.5	0.875	0.575	0.95	1
239600	1	1	1	0.225	0.5	0.95	0.65	0.95	1
240000	1	1	1	0.225	0.5	0.875	0.65	0.95	1
240400	1	1	1	0.225	0.5	0.875	0.725	0.95	1
240800	1	1	1	0.225	0.4	0.875	0.8	0.95	1
241200	1	1	1	0.225	0.45	0.875	0.7	0.9	1
241600	1	1	1	0.225	0.55	0.875	0.625	0.9	1
242000	1	1	1	0.125	0.55	0.875	0.625	0.9	1
242400	1	1	1	0.025	0.5	0.875	0.625	0.9	1
242800	1	1	1	0	0.45	0.875	0.625	0.9	1
243200	1	1	1	0	0.45	0.875	0.725	0.95	1
243600	1	1	1	0	0.45	0.9	0.625	0.85	1
244000	1	1	1	0	0.55	1	0.625	0.75	1
244400	1	1	1	0	0.55	1	0.625	0.75	1
244800	1	1	1	0	0.65	1	0.625	0.75	1
245200	1	1	1	0	0.65	1	0.725	0.8	1
245600	1	1	1	0	0.6	1	0.8	0.8	1
246000	1	1	1	0	0.5	1	0.8	0.8	1
246400	1	1	1	0	0.5	1	0.8	0.8	1
246800	1	1	1	0	0.5	1	0.8	0.8	1
247200	1	1	1	0	0.45	1	0.8	0.8	1
247600	1	1	1	0	0.55	1	0.825	0.9	1
248000	1	1	1	0	0.5	1	0.925	1	1
248400	1	1	1	0	0.45	1	0.825	0.95	1
248800	1	1	1	0	0.35	1	0.825	0.95	1
249200	1	1	1	0.1	0.4	1	0.825	0.95	1
249600	1	1	1	0.125	0.45	1	0.75	0.95	1
250000	1	1	1	0.15	0.55	1	0.75	0.95	1
250400	1	1	1	0.15	0.55	1	0.75	0.95	1
250800	1	1	1	0.15	0.55	1	0.75	0.95	1
251200	1	1	1	0.175	0.65	1	0.75	0.95	1
251600	1	1	1	0.175	0.55	0.975	0.75	0.95	1
252000	1	1	1	0.175	0.5	0.975	0.675	0.95	1
252400	1	1	1	0.175	0.55	0.975	0.775	1	1
252800	1	1	1	0.175	0.6	0.975	0.675	1	1
253200	1	1	1	0.175	0.6	0.975	0.6	1	1
253600	1	1	1	0.175	0.6	0.975	0.675	1	1
254000	1	1	1	0.15	0.55	0.975	0.575	1	1
254400	1	1	1	0.15	0.55	0.975	0.475	1	1
254800	1	1	1	0.15	0.5	0.975	0.475	1	1
255200	1	1	1	0.125	0.45	0.975	0.475	1	1
255600	1	1	1	0.125	0.45	1	0.55	1	1
256000	1	1	1	0.125	0.45	1	0.625	1	1
256400	1	1	1	0.125	0.45	1	0.625	1	1
256800	1	1	1	0.125	0.4	0.975	0.725	1	1
257200	1	1	1	0.05	0.4	0.975	0.8	1	1
257600	1	1	1	0.025	0.3	0.95	0.8	1	1
258000	1	1	1	0.025	0.25	0.95	0.825	1	1
258400	1	1	1	0.025	0.2	0.95	0.825	1	1
258800	1	1	1	0.025	0.2	0.95	0.75	1	1
259200	1	1	1	0.125	0.25	0.95	0.75	1	1
259600	1	1	1	0.15	0.35	0.95	0.75	1	1
260000	1	1	1	0.15	0.45	0.95	0.675	1	1
260400	1	1	1	0.15	0.4	0.95	0.6	1	1
260800	1	1	1	0.15	0.5	0.975	0.6	1	1
261200	1	1	1	0.125	0.5	0.975	0.6	1	1
261600	1	1	1	0.225	0.6	1	0.5	0.95	1
262000	1	1	1	0.225	0.6	0.975	0.475	0.95	1
262400	1	1	1	0.25	0.7	0.975	0.575	0.95	1
262800	1	1	1	0.35	0.8	0.975	0.65	0.95	1
263200	1	1	1	0.25	0.7	0.95	0.65	0.95	1
263600	1	1	1	0.225	0.6	0.95	0.575	0.95	1
264000	1	1	1	0.225	0.6	0.95	0.65	0.95	1
264400	1	1	1	0.225	0.6	0.95	0.725	0.95	1
264800	1	1	1	0.25	0.6	0.95	0.625	0.95	1
265200	1	1	1	0.25	0.5	0.85	0.625	0.95	1
265600	1	1	1	0.15	0.4	0.85	0.625	1	1
266000	1	1	1	0.15	0.4	0.875	0.65	1	1
266400	1	1	1	0.125	0.3	0.875	0.65	1	1
266800	1	1	1	0.025	0.2	0.875	0.65	1	1
267200	1	1	1	0.025	0.3	0.9	0.65	1	1
267600	1	1	1	0.025	0.35	0.9	0.725	1	1
268000	1	1	1	0.025	0.35	0.9	0.65	1	1
268400	1	1	1	0.025	0.45	0.9	0.575	1	1
268800	1	1	1	0	0.35	0.875	0.575	0.95	1
269200	1	1	1	0	0.35	0.975	0.575	0.95	1
269600	1	1	1	0	0.4	0.975	0.675	0.95	1
270000	1	1	1	0	0.45	0.975	0.75	0.95	1
270400	1	1	1	0	0.45	0.95	0.65	0.95	1
270800	1	1	1	0	0.5	0.95	0.65	0.95	1
271200	1	1	1	0	0.4	0.925	0.55	0.95	1
271600	1	1	1	0	0.4	0.925	0.475	0.95	1
272000	1	1	1	0	0.3	0.925	0.475	0.95	1
272400	1	1	1	0	0.25	0.925	0.475	0.95	1
272800	1	1	1	0	0.3	0.95	0.475	0.95	1
273200	1	1	1	0	0.3	0.85	0.4	0.95	1
273600	1	1	1	0	0.25	0.825	0.4	0.95	1
274000	1	1	1	0	0.2	0.8	0.325	0.95	1
274400	1	1	1	0	0.2	0.825	0.425	0.95	1
274800	1	1	1	0	0.15	0.825	0.325	0.95	1
275200	1	1	1	0.1	0.25	0.85	0.425	0.95	1
275600	1	1	1	0.1	0.25	0.85	0.5	0.95	1
276000	1	1	1	0.1	0.35	0.85	0.475	0.95	1
276400	1	1	1	0.1	0.3	0.85	0.45	0.9	1
276800	1	1	1	0.1	0.3	0.85	0.55	0.95	1
277200	1	1	1	0.1	0.4	0.95	0.625	0.95	1
277600	1	1	1	0.1	0.45	0.975	0.55	0.95	1
278000	1	1	1	0.1	0.55	1	0.625	0.95	1
278400	1	1	1	0.1	0.65	1	0.625	0.95	1
278800	1	1	1	0.1	0.7	1	0.725	0.95	1
279200	1	1	1	0	0.7	1	0.65	0.95	1
279600	1	1	1	0.025	0.75	1	0.65	0.95	1
280000	1	1	1	0.025	0.65	1	0.675	0.95	1
280400	1	1	1	0.025	0.65	1	0.7	1	1
280800	1	1	1	0.025	0.65	1	0.7	1	1
281200	1	1	1	0.025	0.65	1	0.625	1	1
281600	1	1	1	0.025	0.65	1	0.7	1	1
282000	1	1	1	0.025	0.55	1	0.6	0.95	1
282400	1	1	1	0.025	0.45	0.9	0.6	0.95	1
282800	1	1	1	0.05	0.5	0.9	0.6	0.95	1
283200	1	1	1	0.05	0.4	0.9	0.675	0.95	1
283600	1	1	1	0.025	0.35	0.9	0.575	0.9	1
284000	1	1	1	0.05	0.45	0.9	0.575	0.9	1
284400	1	1	1	0.05	0.45	0.8	0.65	0.9	1
284800	1	1	1	0.05	0.45	0.8	0.65	0.9	1
285200	1	1	1	0.05	0.35	0.8	0.725	0.9	1
285600	1	1	1	0.05	0.35	0.8	0.725	0.9	1
286000	1	1	1	0.075	0.45	0.8	0.825	0.95	1
286400	1	1	1	0.075	0.45	0.875	0.825	0.95	1
286800	1	1	1	0.05	0.4	0.875	0.75	0.95	1
287200	1	1	1	0.05	0.5	0.875	0.75	0.95	1
287600	1	1	1	0.05	0.45	0.875	0.85	1	1
288000	1	1	1	0.125	0.45	0.875	0.925	1	1
288400	1	1	1	0.225	0.55	0.975	0.925	1	1
288800	1	1	1	0.225	0.5	0.975	0.925	1	1
289200	1	1	1	0.225	0.5	0.975	0.925	1	1
289600	1	1	1	0.225	0.45	0.95	0.925	1	1
290000	1	1	1	0.2	0.4	0.95	0.925	1	1
290400	1	1	1	0.225	0.5	0.975	0.925	1	1
290800	1	1	1	0.25	0.55	0.975	1	1	1
291200	1	1	1	0.275	0.55	0.975	1	1	1
291600	1	1	1	0.275	0.65	0.975	1	1	1
292000	1	1	1	0.175	0.6	0.975	1	1	1
292400	1	1	1	0.075	0.6	0.975	1	1	1
292800	1	1	1	0.075	0.6	0.95	1	1	1
293200	1	1	1	0.1	0.7	0.95	0.9	1	1
293600	1	1	1	0.2	0.8	0.975	0.8	1	1
294000	1	1	1	0.2	0.85	0.975	0.7	1	1
294400	1	1	1	0.175	0.8	0.975	0.7	1	1
294800	1	1	1	0.15	0.75	0.975	0.625	1	1
295200	1	1	1	0.125	0.7	0.975	0.625	1	1
295600	1	1	1	0.125	0.65	0.975	0.625	1	1
296000	1	1	1	0.125	0.7	0.975	0.625	1	1
296400	1	1	1	0.125	0.7	0.975	0.55	1	1
296800	1	1	1	0.125	0.7	0.9	0.55	1	1
297200	1	1	1	0.1	0.7	0.9	0.575	1	1
297600	1	1	1	0	0.65	0.9	0.675	1	1
298000	1	1	1	0	0.6	0.9	0.775	1	1
298400	1	1	1	0	0.6	0.9	0.675	0.9	1
298800	1	1	1	0	0.55	0.9	0.75	0.9	1
299200	1	1	1	0.025	0.6	0.9	0.675	0.9	1
299600	1	1	1	0.025	0.55	0.9	0.675	0.9	1
300000	1	1	1	0.025	0.5	0.9	0.675	0.9	1
300400	1	1	1	0.05	0.5	0.9	0.65	0.85	1
300800	1	1	1	0.05	0.55	1	0.575	0.85	1
301200	1	1	1	0.075	0.55	1	0.55	0.85	1
301600	1	1	1	0.175	0.6	1	0.55	0.85	1
302000	1	1	1	0.275	0.65	1	0.55	0.85	1
302400	1	1	1	0.275	0.65	1	0.55	0.9	1
302800	1	1	1	0.275	0.7	1	0.475	0.9	1
303200	1	1	1	0.25	0.6	0.975	0.475	0.9	1
303600	1	1	1	0.25	0.6	0.95	0.375	0.9	1
304000	1	1	1	0.25	0.6	0.95	0.275	0.8	1
304400	1	1	1	0.225	0.55	0.95	0.375	0.85	1
304800	1	1	1	0.225	0.55	0.95	0.45	0.85	1
305200	1	1	1	0.2	0.45	0.85	0.45	0.8	1
305600	1	1	1	0.1	0.4	0.85	0.45	0.8	1
306000	1	1	1	0	0.3	0.825	0.35	0.8	1
306400	1	1	1	0	0.25	0.825	0.45	0.85	1
306800	1	1	1	0.025	0.3	0.825	0.425	0.85	1
307200	1	1	1	0.125	0.4	0.85	0.5	0.85	1
307600	1	1	1	0.125	0.4	0.775	0.525	0.85	1
308000	1	1	1	0.125	0.35	0.775	0.55	0.95	1
308400	1	1	1	0.125	0.3	0.75	0.55	0.95	1
308800	1	1	1	0.15	0.35	0.75	0.55	0.95	1
309200	1	1	1	0.15	0.45	0.85	0.65	1	1
309600	1	1	1	0.15	0.5	0.85	0.65	1	1
310000	1	1	1	0.15	0.6	0.875	0.675	1	1
310400	1	1	1	0.15	0.65	0.875	0.6	1	1
310800	1	1	1	0.125	0.6	0.875	0.7	1	1
311200	1	1	1	0.025	0.5	0.875	0.7	1	1
311600	1	1	1	0.025	0.5	0.975	0.675	1	1
312000	1	1	1	0.05	0.6	0.975	0.75	1	1
312400	1	1	1	0.05	0.7	1	0.675	1	1
312800	1	1	1	0.025	0.7	1	0.675	1	1
313200	1	1	1	0.025	0.6	0.9	0.675	1	1
313600	1	1	1	0.05	0.6	0.9	0.575	1	1
314000	1	1	1	0.05	0.55	0.9	0.65	1	1
314400	1	1	1	0.05	0.6	0.9	0.725	1	1
314800	1	1	1	0.05	0.6	0.9	0.625	0.95	1
315200	1	1	1	0.075	0.7	0.9	0.625	0.95	1
315600	1	1	1	0.1	0.8	0.9	0.625	0.95	1
316000	1	1	1	0.1	0.8	0.9	0.625	0.95	1
316400	1	1	1	0.1	0.7	0.875	0.6	0.95	1
316800	1	1	1	0.125	0.7	0.875	0.6	0.95	1
317200	1	1	1	0.125	0.8	0.975	0.6	0.95	1
317600	1	1	1	0.1	0.8	0.975	0.625	0.95	1
318000	1	1	1	0.125	0.85	0.975	0.525	0.95	1
318400	1	1	1	0.125	0.75	0.95	0.525	0.95	1
318800	1	1	1	0.125	0.7	0.95	0.625	1	1
319200	1	1	1	0.1	0.7	0.95	0.625	1	1
319600	1	1	1	0.075	0.6	0.95	0.65	1	1
320000	1	1	1	0.05	0.5	0.95	0.65	1	1
320400	1	1	1	0.05	0.6	0.975	0.75	1	1
320800	1	1	1	0.025	0.6	0.975	0.65	1	1
321200	1	1	1	0.025	0.6	0.975	0.65	1	1
321600	1	1	1	0.05	0.6	0.975	0.725	1	1
322000	1	1	1	0.025	0.55	0.975	0.825	1	1
322400	1	1	1	0.025	0.65	1	0.825	1	1
322800	1	1	1	0.125	0.75	1	0.825	1	1
323200	1	1	1	0.125	0.65	0.9	0.825	1	1
323600	1	1	1	0.125	0.65	0.875	0.825	1	1
324000	1	1	1	0.125	0.65	0.85	0.825	1	1
324400	1	1	1	0.125	0.65	0.85	0.825	1	1
324800	1	1	1	0.125	0.65	0.85	0.85	1	1
325200	1	1	1	0.125	0.6	0.85	0.775	1	1
325600	1	1	1	0.1	0.5	0.825	0.775	1	1
326000	1	1	1	0.1	0.5	0.825	0.675	1	1
326400	1	1	1	0.1	0.4	0.725	0.675	1	1
326800	1	1	1	0	0.4	0.725	0.675	1	1
327200	1	1	1	0	0.4	0.825	0.675	1	1
327600	1	1	1	0	0.5	0.85	0.75	1	1
328000	1	1	1	0	0.5	0.875	0.75	1	1
328400	1	1	1	0	0.5	0.875	0.65	1	1
328800	1	1	1	0	0.45	0.875	0.65	1	1
329200	1	1	1	0	0.4	0.85	0.725	1	1
329600	1	1	1	0	0.4	0.875	0.625	1	1
330000	1	1	1	0.025	0.45	0.875	0.65	1	1
330400	1	1	1	0.025	0.45	0.975	0.65	1	1
330800	1	1	1	0.025	0.45	0.975	0.65	1	1
331200	1	1	1	0.025	0.55	0.975	0.575	1	1
331600	1	1	1	0.025	0.5	0.975	0.575	1	1
332000	1	1	1	0.025	0.5	0.875	0.475	1	1
332400	1	1	1	0.025	0.5	0.875	0.475	1	1
332800	1	1	1	0.025	0.45	0.875	0.45	0.95	1
333200	1	1	1	0.025	0.45	0.9	0.45	0.95	1
333600	1	1	1	0.125	0.55	0.9	0.45	0.85	1
334000	1	1	1	0.2	0.55	0.9	0.525	0.85	1
334400	1	1	1	0.2	0.6	0.9	0.525	0.85	1
334800	1	1	1	0.225	0.6	0.9	0.525	0.85	1
335200	1	1	1	0.225	0.6	0.9	0.5	0.8	1
335600	1	1	1	0.225	0.55	0.875	0.5	0.8	1
336000	1	1	1	0.25	0.65	0.975	0.6	0.8	1
336400	1	1	1	0.25	0.55	0.975	0.6	0.8	1
336800	1	1	1	0.25	0.6	0.975	0.7	0.85	1
337200	1	1	1	0.25	0.6	0.95	0.7	0.85	1
337600	1	1	1	0.15	0.55	0.95	0.725	0.95	1
338000	1	1	1	0.05	0.45	0.925	0.65	0.95	1
338400	1	1	1	0.075	0.5	0.925	0.55	0.95	1
338800	1	1	1	0.05	0.4	0.9	0.475	0.95	1
339200	1	1	1	0.05	0.3	0.875	0.575	1	1
339600	1	1	1	0.05	0.4	0.9	0.575	1	1
340000	1	1	1	0.025	0.4	0.9	0.5	1	1
340400	1	1	1	0.025	0.5	0.9	0.6	1	1
340800	1	1	1	0.025	0.45	0.875	0.6	1	1
341200	1	1	1	0.125	0.55	0.9	0.525	1	1
341600	1	1	1	0.125	0.5	0.875	0.525	1	1
342000	1	1	1	0.15	0.6	0.9	0.5	0.9	0.975
342400	1	1	1	0.125	0.6	0.9	0.5	0.9	0.975
342800	1	1	1	0.125	0.6	0.925	0.475	0.9	0.975
343200	1	1	1	0.225	0.7	0.95	0.4	0.9	0.975
343600	1	1	1	0.225	0.65	0.95	0.4	0.9	0.975
344000	1	1	1	0.225	0.55	0.95	0.4	0.9	0.975
344400	1	1	1	0.225	0.55	0.95	0.4	0.9	0.975
344800	1	1	1	0.225	0.55	0.975	0.4	0.9	0.975
345200	1	1	1	0.125	0.45	0.95	0.475	0.9	0.975
345600	1	1	1	0.125	0.5	0.975	0.45	0.9	0.975
346000	1	1	1	0.1	0.4	0.975	0.55	1	1
346400	1	1	1	0.1	0.3	0.975	0.65	1	1
346800	1	1	1	0.1	0.3	0.95	0.75	1	1
347200	1	1	1	0	0.25	0.95	0.825	1	1
347600	1	1	1	0	0.25	0.95	0.825	1	1
348000	1	1	1	0.025	0.35	0.95	0.9	1	1
348400	1	1	1	0.025	0.25	0.95	0.9	1	1
348800	1	1	1	0.05	0.35	0.95	0.9	1	1
349200	1	1	1	0.05	0.35	0.95	0.825	1	1
349600	1	1	1	0.05	0.35	0.95	0.925	1	1
350000	1	1	1	0.05	0.4	0.95	0.925	1	1
350400	1	1	1	0.05	0.4	0.95	0.85	1	1
350800	1	1	1	0.05	0.4	0.95	0.85	1	1
351200	1	1	1	0.05	0.35	0.95	0.75	1	1
351600	1	1	1	0.05	0.4	0.95	0.75	1	1
352000	1	1	1	0.025	0.35	0.95	0.75	1	1
352400	1	1	1	0.025	0.4	0.95	0.75	1	1
352800	1	1	1	0	0.3	0.85	0.75	1	1
353200	1	1	1	0	0.3	0.85	0.825	1	1
353600	1	1	1	0	0.3	0.85	0.825	1	1
354000	1	1	1	0	0.25	0.825	0.75	1	1
354400	1	1	1	0	0.25	0.725	0.825	1	1
354800	1	1	1	0	0.25	0.725	0.825	1	1
355200	1	1	1	0	0.25	0.725	0.825	0.95	1
355600	1	1	1	0.025	0.25	0.725	0.725	0.85	0.975
356000	1	1	1	0.025	0.2	0.7	0.625	0.85	0.975
356400	1	1	1	0.025	0.15	0.675	0.55	0.85	0.975
356800	1	1	1	0.025	0.2	0.775	0.55	0.85	0.975
357200	1	1	1	0.025	0.3	0.8	0.55	0.85	0.975
357600	1	1	1	0.025	0.35	0.8	0.475	0.85	0.975
358000	1	1	1	0.05	0.45	0.825	0.55	0.85	0.975
358400	1	1	1	0.05	0.5	0.925	0.55	0.85	0.975
358800	1	1	1	0.05	0.6	0.95	0.55	0.85	0.975
359200	1	1	1	0.05	0.65	0.95	0.65	0.9	0.975
359600	1	1	1	0.025	0.55	0.95	0.75	1	1
360000	1	1	1	0.025	0.55	0.875	0.85	1	1
360400	1	1	1	0.05	0.65	0.9	0.925	1	1
360800	1	1	1	0.05	0.65	0.9	0.825	1	1
361200	1	1	1	0.075	0.65	0.9	0.825	1	1
361600	1	1	1	0.075	0.55	0.875	0.8	0.95	1
362000	1	1	1	0.05	0.55	0.875	0.7	0.95	1
362400	1	1	1	0.15	0.6	0.875	0.625	0.95	1
362800	1	1	1	0.15	0.5	0.875	0.55	0.95	1
363200	1	1	1	0.15	0.45	0.875	0.45	0.95	1
363600	1	1	1	0.25	0.55	0.875	0.45	0.95	1
364000	1	1	1	0.25	0.55	0.975	0.375	0.95	1
364400	1	1	1	0.225	0.45	0.975	0.375	0.95	1
364800	1	1	1	0.225	0.45	0.975	0.475	0.95	1
365200	1	1	1	0.2	0.4	0.975	0.375	0.95	1
365600	1	1	1	0.225	0.5	1	0.4	1	1
366000	1	1	1	0.225	0.45	1	0.5	1	1
366400	1	1	1	0.125	0.4	1	0.5	1	1
366800	1	1	1	0.125	0.5	1	0.475	0.95	1
367200	1	1	1	0.125	0.6	1	0.575	0.95	1
367600	1	1	1	0.025	0.6	1	0.575	0.95	1
368000	1	1	1	0.025	0.6	0.9	0.55	0.95	1
368400	1	1	1	0.025	0.7	0.9	0.55	0.95	1
368800	1	1	1	0.125	0.75	0.9	0.45	0.85	1
369200	1	1	1	0.125	0.7	0.9	0.475	0.85	1
369600	1	1	1	0.1	0.6	0.875	0.475	0.85	1
370000	1	1	1	0.125	0.65	0.875	0.475	0.85	1
370400	1	1	1	0.125	0.6	0.85	0.55	0.85	1
370800	1	1	1	0.125	0.5	0.825	0.65	0.9	1
371200	1	1	1	0.125	0.45	0.825	0.575	0.9	1
371600	1	1	1	0.125	0.4	0.825	0.575	0.9	1
372000	1	1	1	0.125	0.5	0.925	0.675	0.9	1
372400	1	1	1	0.125	0.4	0.9	0.675	0.9	1
372800	1	1	1	0.025	0.4	0.9	0.775	1	1
373200	1	1	1	0.025	0.45	0.9	0.85	1	1
373600	1	1	1	0.025	0.5	0.925	0.925	1	1
374000	1	1	1	0	0.5	0.925	0.825	1	1
374400	1	1	1	0	0.5	0.925	0.825	1	1
374800	1	1	1	0	0.5	0.925	0.75	1	1
375200	1	1	1	0	0.55	0.925	0.825	1	1
375600	1	1	1	0	0.6	0.925	0.825	1	1
376000	1	1	1	0	0.6	0.925	0.825	1	1
376400	1	1	1	0.1	0.7	0.95	0.725	1	1
376800	1	1	1	0.1	0.6	0.95	0.725	1	1
377200	1	1	1	0.1	0.55	0.95	0.65	1	1
377600	1	1	1	0.125	0.6	0.95	0.55	1	1
378000	1	1	1	0.125	0.55	0.95	0.65	1	1
378400	1	1	1	0.125	0.55	0.95	0.65	1	1
378800	1	1	1	0.125	0.55	0.975	0.725	1	1
379200	1	1	1	0.125	0.5	0.975	0.725	1	1
379600	1	1	1	0.125	0.5	0.975	0.725	1	1
380000	1	1	1	0.125	0.5	0.975	0.725	1	1
380400	1	1	1	0.025	0.5	0.975	0.75	1	1
380800	1	1	1	0.025	0.5	0.975	0.75	1	1
381200	1	1	1	0.05	0.6	0.975	0.825	1	1
381600	1	1	1	0.025	0.55	0.975	0.85	1	1
382000	1	1	1	0.025	0.55	0.975	0.85	1	1
382400	1	1	1	0.025	0.55	0.975	0.85	1	1
382800	1	1	1	0.025	0.6	0.975	0.775	1	1
383200	1	1	1	0.025	0.55	0.95	0.7	1	1
383600	1	1	1	0.025	0.45	0.925	0.7	1	1
384000	1	1	1	0.025	0.4	0.925	0.7	1	1
384400	1	1	1	0.05	0.4	0.925	0.775	1	1
384800	1	1	1	0.05	0.4	0.925	0.675	1	1
385200	1	1	1	0.025	0.3	0.925	0.6	1	1
385600	1	1	1	0.025	0.25	0.9	0.6	1	1
386000	1	1	1	0.025	0.2	0.875	0.6	1	1
386400	1	1	1	0.025	0.25	0.9	0.525	1	1
386800	1	1	1	0.025	0.3	0.9	0.6	1	1
387200	1	1	1	0.025	0.3	0.825	0.675	1	1
387600	1	1	1	0.025	0.3	0.825	0.675	1	1
388000	1	1	1	0.025	0.35	0.825	0.675	1	1
388400	1	1	1	0	0.3	0.825	0.675	1	1
388800	1	1	1	0	0.4	0.825	0.775	1	1
389200	1	1	1	0	0.45	0.825	0.85	1	1
389600	1	1	1	0	0.45	0.75	0.925	1	1
390000	1	1	1	0	0.5	0.775	0.825	0.9	1
390400	1	1	1	0.025	0.55	0.775	0.9	0.9	1
390800	1	1	1	0.05	0.55	0.775	0.9	0.9	1
391200	1	1	1	0.05	0.55	0.875	0.825	0.9	1
391600	1	1	1	0.05	0.65	0.9	0.75	0.9	1
392000	1	1	1	0.05	0.65	0.9	0.675	0.9	1
392400	1	1	1	0.05	0.65	0.9	0.675	0.9	1
392800	1	1	1	0.05	0.55	0.9	0.675	0.9	1
393200	1	1	1	0.05	0.5	0.875	0.675	0.9	1
393600	1	1	1	0.05	0.6	0.975	0.675	0.9	1
394000	1	1	1	0.075	0.65	0.975	0.775	1	1
394400	1	1	1	0.075	0.65	0.975	0.7	1	1
394800	1	1	1	0.05	0.55	0.975	0.7	1	1
395200	1	1	1	0.05	0.6	0.975	0.7	1	1
395600	1	1	1	0.05	0.5	0.95	0.775	1	1
396000	1	1	1	0.05	0.5	0.95	0.85	1	1
396400	1	1	1	0.05	0.55	0.95	0.85	1	1
396800	1	1	1	0.05	0.6	0.95	0.75	0.95	1
397200	1	1	1	0.05	0.7	0.975	0.65	0.95	1
397600	1	1	1	0.05	0.65	0.975	0.575	0.95	1
398000	1	1	1	0.025	0.55	0.975	0.5	0.95	1
398400	1	1	1	0	0.5	0.975	0.575	0.95	1
398800	1	1	1	0	0.6	0.975	0.575	0.95	1
399200	1	1	1	0.025	0.65	0.975	0.65	0.95	1
399600	1	1	1	0.025	0.65	0.9	0.65	0.95	1
400000	1	1	1	0.025	0.65	0.9	0.55	0.9	1

## Sheet: t5
0	0	0	0	0	0	0	0	0	0
400	0	0	0	0	0	0	0	0	0
800	0	0	0	0	0	0.375	0	0	0
1200	0	0	0	0	0	0.25	0	0	0
1600	0	0	0	0	0	0.1875	0	0	0
2000	0	0	0	0	0	0.3	0	0	0
2400	0	0	0	0	0	0.416667	0	0	0
2800	0	0	0	0	0	0.357143	0	0	0
3200	0	0	0	0	0	0.40625	0	0	0
3600	0	0	0	0	0	0.444444	0	0	0
4000	0	0	0	0	0	0.475	0	0	0
4400	0	0	0	0	0	0.55	0	0	0
4800	0	0	0	0	0	0.575	0	0	0
5200	0	0	0	0	0	0.575	0	0	0
5600	0	0	0	0	0	0.65	0	0	0
6000	0	0	0	0	0	0.65	0	0	0
6400	0	0	0	0	0	0.55	0	0	0
6800	0	0	0	0	0	0.65	0	0	0
7200	0	0	0	0	0	0.675	0	0	0
7600	0	0	0	0	0	0.6	0	0	0
8000	0	0	0	0	0	0.525	0	0	0
8400	0	0	0	0	0	0.55	0	0	0
8800	0	0	0	0	0	0.55	0	0	0
9200	0	0	0	0	0	0.55	0	0	0.075
9600	0	0	0	0	0	0.55	0	0	0.075
10000	0	0	0	0	0	0.475	0	0	0.075
10400	0	0	0	0	0	0.575	0	0	0.075
10800	0	0	0	0	0	0.475	0	0	0.075
11200	0	0	0	0	0	0.375	0	0	0.15
11600	0	0	0	0	0	0.375	0	0	0.25
12000	0	0	0	0	0	0.375	0	0	0.25
12400	0	0	0	0	0.05	0.375	0	0	0.25
12800	0	0	0	0	0.05	0.35	0	0	0.25
13200	0	0	0	0	0.05	0.35	0	0	0.175
13600	0	0	0	0	0.05	0.275	0	0	0.175
14000	0	0	0	0	0.05	0.275	0	0	0.175
14400	0	0	0	0	0.05	0.175	0	0	0.175
14800	0	0	0	0	0.05	0.175	0	0	0.175
15200	0	0	0	0	0.05	0.25	0	0	0.175
15600	0	0	0	0	0.1	0.35	0	0	0.075
16000	0	0	0	0	0.1	0.35	0	0	0.075
16400	0	0	0	0	0.05	0.25	0	0	0.075
16800	0	0	0	0	0.05	0.25	0	0	0.175
17200	0	0	0	0	0.05	0.325	0	0	0.175
17600	0	0	0	0	0.05	0.325	0	0	0.175
18000	0	0	0	0	0.05	0.425	0	0	0.175
18400	0	0	0	0	0.05	0.525	0	0	0.175
18800	0	0	0	0	0.05	0.525	0	0	0.175
19200	0	0	0	0	0.05	0.45	0	0	0.1
19600	0	0	0	0	0	0.35	0	0	0.1
20000	0	0	0	0	0	0.35	0	0	0.1
20400	0	0	0	0	0	0.35	0	0	0.1
20800	0	0	0	0	0	0.275	0	0	0
21200	0	0	0	0	0.05	0.3	0	0	0
21600	0	0	0	0	0.05	0.4	0	0.1	0.1
22000	0	0	0	0	0.1	0.4	0	0.1	0.1
22400	0	0	0	0	0.1	0.3	0	0.1	0.175
22800	0	0	0	0	0.1	0.375	0	0.1	0.25
23200	0	0	0	0	0.1	0.45	0	0.1	0.35
23600	0	0	0	0	0.1	0.45	0	0.1	0.35
24000	0	0	0	0	0.1	0.45	0	0.1	0.35
24400	0	0	0	0	0.1	0.55	0	0.1	0.35
24800	0	0	0	0	0.1	0.55	0	0.1	0.35
25200	0	0	0	0	0.05	0.55	0	0.15	0.45
25600	0	0	0	0	0.05	0.525	0	0.05	0.45
26000	0	0	0	0	0.05	0.525	0	0.05	0.45
26400	0	0	0	0	0.05	0.525	0	0.05	0.45
26800	0	0	0	0	0.05	0.45	0	0.05	0.45
27200	0	0	0	0	0.05	0.475	0	0.05	0.425
27600	0	0	0	0	0.05	0.55	0	0.05	0.425
28000	0	0	0	0	0.05	0.55	0	0.05	0.425
28400	0	0	0	0	0.05	0.55	0	0.1	0.525
28800	0	0	0	0	0.05	0.65	0	0.1	0.525
29200	0	0	0	0	0.05	0.55	0	0.1	0.525
29600	0	0	0	0	0.05	0.55	0	0.1	0.425
30000	0	0	0	0	0	0.55	0	0.15	0.525
30400	0	0	0	0	0.05	0.65	0	0.15	0.55
30800	0	0	0	0	0.05	0.725	0	0.15	0.475
31200	0	0	0	0	0.1	0.725	0	0.15	0.5
31600	0	0	0	0	0.1	0.75	0	0.2	0.6
32000	0	0	0	0	0.2	0.85	0	0.2	0.6
32400	0	0	0	0	0.2	0.825	0	0.15	0.5
32800	0	0	0	0	0.25	0.825	0	0.15	0.5
33200	0	0	0	0	0.25	0.9	0	0.1	0.4
33600	0	0	0	0	0.25	0.825	0	0.1	0.5
34000	0	0	0	0	0.25	0.725	0	0.05	0.475
34400	0	0	0	0	0.2	0.725	0	0.05	0.475
34800	0	0	0	0	0.2	0.65	0	0.05	0.55
35200	0	0	0	0	0.15	0.65	0	0.05	0.45
35600	0	0	0	0	0.15	0.625	0	0	0.45
36000	0	0	0	0	0.05	0.625	0	0	0.525
36400	0	0	0	0	0.15	0.65	0	0	0.525
36800	0	0	0.075	0	0.1	0.55	0	0	0.525
37200	0	0	0.075	0	0.1	0.475	0	0	0.6
37600	0	0	0.075	0	0.1	0.475	0	0	0.5
38000	0	0	0.075	0	0.1	0.575	0	0	0.425
38400	0	0	0.075	0	0.1	0.475	0	0	0.325
38800	0	0	0.075	0	0.1	0.575	0	0	0.25
39200	0	0	0.075	0	0.1	0.575	0	0	0.25
39600	0	0	0.075	0	0.1	0.5	0	0	0.15
40000	0	0	0.075	0	0.1	0.4	0	0	0.15
40400	0	0	0.075	0	0.05	0.4	0	0	0.225
40800	0	0	0	0	0.05	0.5	0	0	0.3
41200	0	0	0	0	0.15	0.6	0	0	0.3
41600	0	0	0	0	0.15	0.675	0	0	0.3
42000	0	0	0	0	0.15	0.575	0	0	0.4
42400	0	0	0	0	0.15	0.65	0	0	0.475
42800	0	0	0	0	0.15	0.55	0	0	0.475
43200	0	0	0	0	0.2	0.55	0	0	0.475
43600	0	0	0	0	0.25	0.65	0	0	0.55
44000	0	0	0	0	0.35	0.75	0	0	0.475
44400	0	0	0	0	0.3	0.65	0	0	0.475
44800	0	0	0	0	0.3	0.625	0	0	0.4
45200	0	0	0	0	0.2	0.525	0	0	0.325
45600	0	0	0	0	0.2	0.45	0	0	0.425
46000	0	0	0	0	0.2	0.55	0	0	0.4
46400	0	0	0	0	0.2	0.475	0	0	0.425
46800	0	0	0	0	0.2	0.475	0	0.05	0.525
47200	0	0	0	0	0.15	0.45	0	0.05	0.525
47600	0	0	0	0	0.1	0.45	0	0.05	0.55
48000	0	0	0	0	0	0.45	0	0.05	0.625
48400	0	0	0	0	0	0.55	0	0.05	0.625
48800	0	0	0	0	0	0.475	0	0.05	0.625
49200	0	0	0	0	0.05	0.575	0	0.05	0.625
49600	0	0	0	0	0.05	0.65	0	0.05	0.525
50000	0	0	0	0	0.15	0.65	0	0.05	0.525
50400	0	0	0	0	0.15	0.725	0	0.05	0.425
50800	0	0	0	0	0.2	0.825	0	0	0.325
51200	0	0	0	0	0.2	0.75	0	0	0.325
51600	0	0	0	0	0.2	0.725	0	0	0.225
52000	0	0	0	0	0.2	0.725	0	0	0.225
52400	0	0	0	0	0.2	0.7	0	0	0.15
52800	0	0	0	0	0.2	0.8	0	0	0.225
53200	0	0	0	0	0.15	0.8	0	0	0.225
53600	0	0	0	0	0.15	0.8	0	0	0.225
54000	0	0	0	0	0.05	0.775	0	0	0.225
54400	0	0	0	0	0.1	0.8	0	0	0.225
54800	0	0	0	0	0.05	0.8	0	0	0.3
55200	0	0	0	0	0.05	0.875	0	0	0.3
55600	0	0	0	0	0.05	0.9	0	0	0.3
56000	0	0	0	0	0.1	0.9	0	0	0.3
56400	0	0	0	0	0.1	0.825	0	0	0.4
56800	0	0	0	0	0.1	0.8	0	0	0.4
57200	0	0	0	0	0.1	0.775	0	0	0.475
57600	0	0	0	0	0.1	0.8	0	0	0.55
58000	0	0	0	0	0.15	0.825	0	0	0.475
58400	0	0	0	0	0.2	0.825	0	0	0.55
58800	0	0	0	0	0.2	0.8	0	0	0.575
59200	0	0	0	0	0.3	0.825	0	0	0.575
59600	0	0	0	0	0.3	0.8	0	0	0.575
60000	0	0	0	0	0.25	0.8	0	0	0.5
60400	0	0	0	0	0.25	0.9	0	0	0.4
60800	0	0	0	0	0.25	0.9	0	0	0.325
61200	0	0	0	0	0.25	0.825	0	0	0.25
61600	0	0	0	0	0.25	0.8	0	0	0.25
62000	0	0	0	0	0.2	0.775	0	0	0.25
62400	0	0	0	0	0.15	0.775	0	0	0.175
62800	0	0	0	0	0.15	0.7	0	0	0.075
63200	0	0	0	0	0.05	0.6	0	0	0.075
63600	0	0	0	0	0.05	0.525	0	0	0.075
64000	0	0	0	0	0.05	0.5	0	0	0.075
64400	0	0	0	0	0.1	0.5	0	0	0.075
64800	0	0	0	0	0.2	0.525	0	0	0.175
65200	0	0	0	0	0.2	0.625	0	0	0.175
65600	0	0	0	0	0.2	0.55	0	0	0.1
66000	0	0	0	0	0.2	0.475	0	0	0.1
66400	0	0	0	0	0.15	0.375	0	0	0.175
66800	0	0	0	0	0.25	0.475	0	0	0.175
67200	0	0	0	0	0.3	0.575	0	0	0.25
67600	0	0	0	0	0.35	0.675	0	0	0.325
68000	0	0	0	0	0.35	0.6	0	0	0.425
68400	0	0	0	0	0.35	0.6	0	0	0.425
68800	0	0	0	0	0.25	0.5	0	0	0.4
69200	0	0	0	0	0.25	0.4	0	0	0.5
69600	0	0	0	0	0.25	0.5	0	0	0.575
70000	0	0	0	0	0.25	0.575	0	0	0.575
70400	0	0	0	0	0.25	0.675	0	0	0.575
70800	0	0	0	0	0.2	0.675	0	0	0.575
71200	0	0	0	0	0.15	0.65	0	0	0.575
71600	0	0	0	0	0.1	0.65	0	0	0.5
72000	0	0	0	0	0.1	0.65	0	0	0.475
72400	0	0	0	0	0.1	0.65	0	0	0.575
72800	0	0	0	0	0.1	0.725	0	0	0.575
73200	0	0	0	0	0.1	0.725	0	0	0.475
73600	0	0	0	0	0.1	0.625	0	0	0.4
74000	0	0	0	0	0.1	0.625	0	0	0.5
74400	0	0	0	0	0.1	0.525	0	0	0.425
74800	0	0	0	0	0.05	0.525	0	0	0.425
75200	0	0	0	0	0.05	0.525	0	0	0.425
75600	0	0	0	0	0.05	0.425	0	0	0.425
76000	0	0	0	0	0.05	0.525	0	0	0.35
76400	0	0	0	0	0	0.525	0	0	0.25
76800	0	0	0	0.025	0.1	0.55	0	0	0.25
77200	0	0	0	0.025	0.1	0.65	0	0	0.35
77600	0	0	0	0.025	0.1	0.65	0	0	0.35
78000	0	0	0	0.025	0.15	0.675	0	0	0.325
78400	0	0	0	0.025	0.2	0.775	0	0	0.325
78800	0	0	0	0.025	0.2	0.775	0	0	0.325
79200	0	0	0	0.025	0.2	0.775	0	0.05	0.35
79600	0	0	0	0.025	0.2	0.875	0	0.1	0.45
80000	0	0	0	0.025	0.2	0.775	0	0.1	0.525
80400	0	0	0	0.025	0.2	0.675	0	0.1	0.525
80800	0	0	0	0	0.1	0.65	0	0.1	0.55
81200	0	0	0	0	0.2	0.65	0	0.1	0.45
81600	0	0	0	0	0.3	0.75	0	0.2	0.55
82000	0	0	0	0	0.3	0.75	0	0.3	0.575
82400	0	0	0	0	0.25	0.725	0	0.3	0.575
82800	0	0	0	0	0.25	0.7	0	0.3	0.65
83200	0	0	0	0	0.3	0.725	0	0.25	0.625
83600	0	0	0	0	0.3	0.7	0	0.2	0.525
84000	0	0	0	0	0.3	0.7	0	0.25	0.55
84400	0	0	0	0	0.4	0.8	0	0.25	0.55
84800	0	0	0	0	0.4	0.8	0	0.25	0.55
85200	0	0	0	0	0.3	0.775	0	0.25	0.625
85600	0	0	0	0	0.2	0.775	0	0.15	0.6
86000	0	0	0	0	0.15	0.775	0	0.05	0.5
86400	0	0	0	0	0.15	0.7	0	0.1	0.6
86800	0	0	0	0	0.2	0.725	0	0.1	0.525
87200	0	0	0	0	0.2	0.725	0	0.1	0.45
87600	0	0	0	0	0.2	0.65	0	0.1	0.45
88000	0	0	0	0	0.2	0.75	0	0.05	0.45
88400	0	0	0	0	0.1	0.65	0	0.05	0.55
88800	0	0	0	0	0.15	0.675	0	0.05	0.45
89200	0	0	0	0	0.15	0.6	0	0.05	0.475
89600	0	0	0	0	0.2	0.6	0	0.05	0.475
90000	0	0	0.075	0	0.2	0.5	0	0.05	0.55
90400	0	0	0.075	0	0.2	0.5	0	0	0.45
90800	0	0	0.075	0	0.15	0.5	0	0	0.525
91200	0	0	0.075	0	0.1	0.475	0	0	0.525
91600	0	0	0.075	0	0.1	0.475	0	0	0.525
92000	0	0	0.075	0	0.1	0.375	0	0	0.5
92400	0	0	0.15	0	0.1	0.45	0	0	0.5
92800	0	0	0.15	0	0.05	0.35	0	0	0.6
93200	0	0	0.15	0	0.05	0.35	0	0	0.5
93600	0	0	0.15	0	0.05	0.35	0	0	0.5
94000	0	0	0.15	0	0.1	0.45	0	0	0.425
94400	0	0	0.15	0	0.15	0.55	0	0	0.5
94800	0	0	0.15	0	0.25	0.55	0	0.05	0.525
95200	0	0	0.15	0	0.3	0.575	0	0.05	0.625
95600	0	0	0.15	0	0.35	0.675	0	0.1	0.725
96000	0	0	0.15	0	0.35	0.75	0	0.1	0.75
96400	0	0	0.075	0	0.35	0.775	0	0.1	0.725
96800	0	0	0.075	0	0.35	0.775	0	0.1	0.625
97200	0	0	0.075	0	0.35	0.85	0	0.1	0.7
97600	0	0	0.075	0	0.3	0.85	0	0.1	0.625
98000	0	0	0	0	0.25	0.85	0	0.1	0.625
98400	0	0	0	0	0.2	0.85	0	0.2	0.65
98800	0	0	0	0	0.1	0.85	0	0.15	0.55
99200	0	0	0	0	0.05	0.85	0	0.15	0.45
99600	0	0	0.075	0	0.05	0.85	0	0.1	0.45
100000	0	0	0.075	0	0.05	0.85	0	0.1	0.425
100400	0	0	0.15	0	0.05	0.85	0	0.1	0.35
100800	0	0	0.225	0	0.05	0.95	0	0.1	0.425
101200	0	0	0.225	0	0.05	0.975	0	0.1	0.35
101600	0	0	0.225	0	0.1	0.975	0	0.1	0.35
102000	0	0	0.225	0	0.1	0.975	0	0.1	0.45
102400	0	0	0.225	0	0.1	0.975	0	0	0.35
102800	0	0	0.225	0	0.1	0.975	0	0	0.425
103200	0	0	0.225	0	0.15	0.975	0	0	0.525
103600	0	0	0.15	0	0.1	0.875	0	0	0.425
104000	0	0	0.15	0	0.1	0.9	0	0	0.425
104400	0	0	0.075	0	0.1	0.8	0	0	0.425
104800	0	0	0	0	0.1	0.8	0	0	0.45
105200	0	0	0.075	0	0.1	0.8	0	0	0.525
105600	0	0	0.15	0	0.05	0.8	0	0	0.525
106000	0	0	0.225	0	0.1	0.8	0	0	0.5
106400	0	0	0.225	0	0.1	0.775	0	0	0.5
106800	0	0	0.225	0	0.1	0.775	0	0.1	0.525
107200	0	0	0.225	0	0.1	0.775	0	0.1	0.425
107600	0	0	0.225	0	0.2	0.875	0	0.1	0.425
108000	0	0	0.225	0.025	0.3	0.875	0	0.1	0.45
108400	0	0	0.225	0.025	0.3	0.95	0	0.15	0.55
108800	0	0	0.225	0.025	0.3	0.925	0	0.15	0.525
109200	0	0	0.15	0.025	0.3	0.925	0	0.15	0.45
109600	0	0	0.075	0.025	0.3	0.825	0	0.15	0.45
110000	0	0	0	0.025	0.3	0.825	0	0.15	0.475
110400	0	0	0	0.025	0.3	0.85	0	0.15	0.475
110800	0	0	0	0.025	0.3	0.85	0	0.05	0.375
111200	0	0	0	0.025	0.25	0.85	0	0.05	0.45
111600	0	0	0	0.025	0.15	0.825	0	0.05	0.55
112000	0	0	0.075	0	0.05	0.825	0	0.05	0.55
112400	0	0	0.075	0	0.05	0.75	0	0	0.45
112800	0	0	0.175	0	0.1	0.775	0	0	0.375
113200	0	0	0.175	0	0.1	0.675	0	0	0.45
113600	0	0	0.175	0	0.1	0.675	0	0	0.45
114000	0	0	0.175	0	0.05	0.675	0	0	0.35
114400	0	0	0.175	0	0.15	0.675	0	0	0.45
114800	0	0	0.25	0	0.15	0.575	0	0	0.55
115200	0	0	0.325	0	0.15	0.575	0	0	0.475
115600	0	0	0.425	0	0.15	0.5	0	0	0.375
116000	0	0	0.45	0	0.2	0.5	0	0	0.375
116400	0	0	0.525	0	0.2	0.6	0	0	0.375
116800	0	0	0.5	0	0.15	0.575	0	0	0.45
117200	0	0	0.575	0	0.15	0.65	0	0	0.45
117600	0	0	0.675	0	0.25	0.75	0	0	0.525
118000	0	0	0.75	0	0.25	0.65	0	0	0.6
118400	0	0	0.825	0	0.15	0.55	0	0	0.5
118800	0	0	0.85	0	0.15	0.55	0	0	0.475
119200	0	0	0.85	0	0.15	0.45	0	0	0.475
119600	0	0	0.85	0.025	0.25	0.55	0	0	0.475
120000	0	0	0.825	0.025	0.2	0.55	0	0	0.45
120400	0	0	0.825	0.025	0.2	0.525	0	0	0.45
120800	0	0	0.825	0.025	0.2	0.45	0	0	0.475
121200	0	0	0.825	0.025	0.2	0.375	0	0	0.5
121600	0	0	0.825	0.025	0.1	0.375	0	0.1	0.525
122000	0	0.05	0.85	0.025	0.1	0.475	0	0.1	0.45
122400	0	0.1	0.875	0.025	0.1	0.575	0	0.1	0.45
122800	0	0.1	0.875	0.025	0.1	0.675	0	0.1	0.375
123200	0	0.1	0.9	0.025	0.15	0.775	0	0.1	0.375
123600	0	0.1	0.875	0	0.05	0.775	0	0.1	0.375
124000	0	0.1	0.9	0	0.05	0.675	0	0.1	0.3
124400	0	0.1	0.9	0	0.05	0.6	0	0.1	0.3
124800	0	0.1	0.925	0	0.15	0.7	0	0.1	0.2
125200	0	0.1	0.925	0	0.15	0.775	0	0.1	0.1
125600	0	0.1	0.925	0	0.15	0.675	0	0	0
126000	0	0.05	0.925	0	0.15	0.65	0	0	0
126400	0	0	0.925	0	0.15	0.65	0	0	0
126800	0	0	0.925	0	0.15	0.65	0	0	0
127200	0	0	0.925	0	0.15	0.65	0	0	0
127600	0	0	0.95	0	0.2	0.65	0	0	0
128000	0	0	0.95	0	0.2	0.725	0	0	0
128400	0	0	0.975	0	0.2	0.825	0	0	0.075
128800	0	0	0.975	0	0.1	0.725	0	0.05	0.175
129200	0	0	1	0	0.1	0.725	0	0.05	0.175
129600	0	0.05	1	0	0.15	0.825	0	0.05	0.25
130000	0	0.05	1	0	0.15	0.85	0	0.05	0.25
130400	0	0.05	1	0	0.15	0.75	0	0.05	0.325
130800	0	0.05	1	0	0.15	0.725	0	0.05	0.325
131200	0	0.05	1	0	0.1	0.7	0	0.05	0.325
131600	0	0.05	1	0	0.05	0.6	0	0.05	0.4
132000	0	0.05	1	0	0.05	0.6	0	0.05	0.4
132400	0	0.05	1	0	0.05	0.5	0	0.05	0.325
132800	0	0.05	1	0	0.05	0.6	0	0.05	0.325
133200	0	0.05	1	0	0.05	0.6	0	0.05	0.325
133600	0	0	1	0	0	0.5	0	0.05	0.25
134000	0	0	1	0	0.05	0.5	0	0.05	0.25
134400	0	0	1	0	0.05	0.575	0	0.05	0.275
134800	0	0	1	0	0.05	0.6	0	0.05	0.275
135200	0	0	1	0	0.05	0.525	0	0.05	0.35
135600	0	0	1	0	0.05	0.6	0	0.05	0.275
136000	0	0	1	0	0.05	0.6	0	0.05	0.275
136400	0	0.05	1	0	0.05	0.6	0	0.05	0.275
136800	0	0.05	1	0	0.05	0.5	0	0	0.175
137200	0	0.05	1	0	0.05	0.425	0	0	0.275
137600	0	0.1	1	0	0.05	0.425	0	0	0.375
138000	0	0.1	1	0	0	0.325	0	0	0.45
138400	0	0.1	1	0	0	0.25	0	0	0.35
138800	0	0.15	1	0	0.05	0.25	0	0	0.35
139200	0	0.2	1	0	0.05	0.25	0	0	0.275
139600	0	0.2	1	0	0.05	0.25	0	0	0.275
140000	0	0.2	1	0	0.05	0.25	0	0	0.35
140400	0	0.25	1	0	0.1	0.35	0	0	0.425
140800	0	0.3	1	0	0.1	0.35	0	0	0.425
141200	0.025	0.4	1	0	0.1	0.35	0	0	0.325
141600	0.025	0.4	1	0	0.1	0.425	0	0	0.225
142000	0.025	0.4	1	0	0.1	0.5	0	0	0.15
142400	0.025	0.4	1	0	0.1	0.575	0	0	0.25
142800	0.025	0.4	1	0	0.05	0.475	0	0	0.25
143200	0.025	0.4	1	0	0.05	0.55	0	0	0.25
143600	0.025	0.5	1	0	0.05	0.475	0	0	0.325
144000	0.025	0.55	1	0	0.1	0.5	0	0	0.25
144400	0.025	0.5	1	0	0.1	0.5	0	0	0.175
144800	0.025	0.5	1	0	0.1	0.5	0	0.05	0.275
145200	0	0.45	1	0	0.1	0.5	0	0.05	0.35
145600	0	0.45	1	0	0.1	0.5	0	0.05	0.425
146000	0	0.5	1	0	0.1	0.5	0	0.05	0.425
146400	0	0.55	1	0	0.1	0.525	0	0.1	0.425
146800	0	0.55	1	0	0.1	0.6	0	0.1	0.525
147200	0	0.55	1	0	0.1	0.525	0	0.1	0.6
147600	0	0.5	1	0	0.2	0.625	0	0.1	0.6
148000	0	0.55	1	0	0.15	0.525	0	0.1	0.675
148400	0	0.6	1	0	0.1	0.5	0	0.1	0.75
148800	0	0.65	1	0	0.1	0.575	0	0.05	0.65
149200	0	0.7	1	0	0.1	0.65	0	0.05	0.575
149600	0	0.7	1	0	0.1	0.65	0	0.05	0.575
150000	0	0.7	1	0	0.1	0.675	0	0.05	0.575
150400	0	0.7	1	0	0.1	0.575	0	0	0.475
150800	0	0.7	1	0	0.1	0.5	0	0	0.45
151200	0	0.75	1	0	0.1	0.6	0	0	0.375
151600	0	0.8	1	0	0	0.5	0	0	0.3
152000	0	0.8	1	0	0	0.5	0	0	0.325
152400	0	0.8	1	0	0	0.425	0	0	0.325
152800	0	0.8	1	0	0	0.45	0	0	0.325
153200	0	0.8	1	0	0	0.45	0	0	0.4
153600	0	0.85	1	0	0	0.475	0	0	0.4
154000	0	0.9	1	0	0	0.45	0	0	0.475
154400	0	0.95	1	0	0	0.45	0	0	0.475
154800	0	1	1	0	0	0.525	0	0	0.4
155200	0	1	1	0	0	0.5	0	0	0.4
155600	0	1	1	0	0	0.6	0	0	0.4
156000	0	1	1	0	0	0.675	0	0	0.3
156400	0	1	1	0	0	0.675	0	0	0.325
156800	0	1	1	0	0	0.575	0	0	0.4
157200	0	1	1	0	0	0.575	0	0	0.325
157600	0.025	1	1	0	0	0.475	0	0	0.25
158000	0.05	1	1	0	0	0.4	0	0.05	0.275
158400	0.05	1	1	0	0	0.475	0	0.05	0.275
158800	0.05	1	1	0	0	0.4	0	0.15	0.375
159200	0.05	1	1	0	0	0.325	0	0.15	0.45
159600	0.075	1	1	0	0	0.325	0	0.15	0.525
160000	0.075	1	1	0	0	0.325	0	0.15	0.6
160400	0.075	1	1	0	0	0.325	0	0.15	0.575
160800	0.1	1	1	0	0	0.425	0	0.15	0.575
161200	0.1	1	1	0	0	0.35	0	0.15	0.65
161600	0.075	1	1	0	0	0.425	0	0.15	0.65
162000	0.05	1	1	0	0	0.5	0	0.1	0.55
162400	0.05	1	1	0	0	0.425	0	0.1	0.55
162800	0.05	1	1	0	0	0.425	0	0	0.45
163200	0.05	1	1	0	0	0.5	0	0	0.375
163600	0.025	1	1	0	0	0.4	0	0	0.3
164000	0.05	1	1	0	0	0.325	0	0	0.325
164400	0.075	1	1	0	0	0.4	0	0	0.325
164800	0.05	1	1	0	0	0.375	0	0	0.25
165200	0.05	1	1	0	0	0.475	0	0	0.175
165600	0.075	1	1	0	0	0.5	0	0	0.175
166000	0.1	1	1	0	0	0.5	0	0	0.25
166400	0.125	1	1	0	0.05	0.6	0	0	0.25
166800	0.125	1	1	0	0.05	0.6	0	0	0.35
167200	0.15	1	1	0	0.05	0.6	0	0	0.35
167600	0.15	1	1	0	0.05	0.7	0	0	0.35
168000	0.15	1	1	0	0.05	0.8	0	0	0.25
168400	0.15	1	1	0	0.05	0.725	0	0	0.175
168800	0.175	1	1	0	0.05	0.725	0	0	0.175
169200	0.175	1	1	0	0.05	0.7	0	0	0.175
169600	0.15	1	1	0	0.05	0.6	0	0	0.25
170000	0.15	1	1	0	0.05	0.6	0	0	0.175
170400	0.15	1	1	0	0	0.6	0	0	0.25
170800	0.175	1	1	0	0	0.7	0	0	0.225
171200	0.25	1	1	0	0.1	0.725	0	0	0.225
171600	0.275	1	1	0	0.15	0.725	0	0	0.225
172000	0.275	1	1	0	0.15	0.725	0	0	0.325
172400	0.275	1	1	0	0.15	0.8	0	0	0.325
172800	0.275	1	1	0	0.15	0.725	0	0.05	0.425
173200	0.3	1	1	0	0.15	0.725	0	0.05	0.5
173600	0.325	1	1	0	0.15	0.825	0	0.05	0.425
174000	0.325	1	1	0	0.15	0.825	0	0.05	0.5
174400	0.325	1	1	0	0.15	0.725	0	0.05	0.5
174800	0.325	1	1	0	0.15	0.625	0	0.05	0.425
175200	0.25	1	1	0	0.05	0.625	0	0.05	0.5
175600	0.25	1	1	0	0	0.6	0	0.05	0.5
176000	0.25	1	1	0	0	0.5	0	0.05	0.4
176400	0.25	1	1	0	0	0.5	0	0.05	0.475
176800	0.25	1	1	0	0	0.575	0	0	0.375
177200	0.25	1	1	0	0	0.6	0.025	0.1	0.4
177600	0.25	1	1	0	0	0.5	0.025	0.1	0.475
178000	0.25	1	1	0	0	0.425	0.025	0.1	0.4
178400	0.25	1	1	0	0	0.525	0.025	0.1	0.325
178800	0.325	1	1	0	0.05	0.625	0.025	0.1	0.325
179200	0.325	1	1	0	0.1	0.625	0.025	0.1	0.25
179600	0.325	1	1	0	0.1	0.65	0.025	0.1	0.25
180000	0.325	1	1	0	0.1	0.65	0.025	0.1	0.325
180400	0.325	1	1	0	0.1	0.65	0.025	0.1	0.35
180800	0.325	1	1	0	0.2	0.675	0.025	0.1	0.35
181200	0.325	1	1	0	0.25	0.675	0	0	0.325
181600	0.4	1	1	0	0.25	0.675	0	0	0.25
182000	0.4	1	1	0	0.25	0.675	0	0	0.35
182400	0.4	1	1	0	0.25	0.675	0	0	0.35
182800	0.325	1	1	0	0.2	0.675	0	0.05	0.45
183200	0.325	1	1	0	0.15	0.575	0	0.05	0.45
183600	0.325	1	1	0	0.15	0.55	0	0.05	0.45
184000	0.325	1	1	0	0.15	0.55	0	0.05	0.45
184400	0.325	1	1	0	0.15	0.55	0	0.05	0.45
184800	0.325	1	1	0	0.05	0.45	0	0.05	0.55
185200	0.325	1	1	0	0	0.425	0	0.05	0.575
185600	0.25	1	1	0	0	0.425	0	0.05	0.575
186000	0.25	1	1	0	0	0.425	0	0.05	0.575
186400	0.25	1	1	0	0	0.325	0	0.05	0.675
186800	0.25	1	1	0	0	0.225	0	0	0.65
187200	0.25	1	1	0	0	0.225	0	0	0.65
187600	0.25	1	1	0	0	0.15	0	0	0.725
188000	0.25	1	1	0	0	0.15	0	0	0.65
188400	0.25	1	1	0	0	0.075	0	0	0.55
188800	0.25	1	1	0	0	0.15	0.025	0.1	0.55
189200	0.25	1	1	0	0	0.075	0.025	0.1	0.525
189600	0.25	1	1	0	0	0.15	0.025	0.1	0.525
190000	0.25	1	1	0	0	0.25	0.025	0.1	0.425
190400	0.25	1	1	0	0	0.25	0.025	0.1	0.325
190800	0.325	1	1	0	0	0.325	0.025	0.1	0.325
191200	0.4	1	1	0	0	0.325	0.025	0.1	0.325
191600	0.4	1	1	0	0	0.325	0.025	0.1	0.325
192000	0.4	1	1	0	0	0.325	0.025	0.1	0.325
192400	0.4	1	1	0	0.05	0.425	0.025	0.1	0.4
192800	0.4	1	1	0	0.05	0.425	0	0	0.3
193200	0.4	1	1	0	0.05	0.5	0	0	0.225
193600	0.4	1	1	0	0.05	0.525	0	0	0.225
194000	0.4	1	1	0	0.05	0.525	0	0	0.225
194400	0.4	1	1	0	0.1	0.625	0	0	0.225
194800	0.325	1	1	0	0.1	0.65	0	0	0.225
195200	0.25	1	1	0	0.1	0.65	0	0	0.225
195600	0.25	1	1	0	0.1	0.725	0	0	0.15
196000	0.25	1	1	0	0.1	0.725	0	0	0.15
196400	0.325	1	1	0	0.05	0.725	0	0	0.075
196800	0.325	1	1	0	0.05	0.65	0	0	0.075
197200	0.325	1	1	0	0.05	0.675	0	0	0.175
197600	0.325	1	1	0	0.05	0.575	0	0	0.175
198000	0.325	1	1	0	0.1	0.575	0	0	0.175
198400	0.325	1	1	0	0.05	0.575	0	0	0.175
198800	0.325	1	1	0	0.05	0.55	0	0	0.2
199200	0.325	1	1	0	0.05	0.625	0	0	0.2
199600	0.325	1	1	0	0.05	0.65	0	0	0.2
200000	0.325	1	1	0	0.05	0.65	0	0	0.2
200400	0.25	1	1	0	0.1	0.65	0	0	0.2
200800	0.25	1	1	0	0.1	0.65	0	0	0.2
201200	0.25	1	1	0	0.1	0.55	0	0	0.1
201600	0.25	1	1	0	0.1	0.625	0	0	0.1
202000	0.25	1	1	0	0.05	0.525	0	0	0.1
202400	0.25	1	1	0	0.05	0.425	0	0	0.1
202800	0.25	1	1	0	0.05	0.35	0	0	0.1
203200	0.25	1	1	0	0.1	0.375	0	0	0.1
203600	0.25	1	1	0	0.1	0.375	0	0	0.175
204000	0.25	1	1	0	0.15	0.475	0	0	0.175
204400	0.25	1	1	0	0.1	0.375	0	0	0.175
204800	0.25	1	1	0	0.1	0.45	0	0	0.175
205200	0.25	1	1	0	0.1	0.45	0	0	0.175
205600	0.25	1	1	0	0.1	0.45	0	0	0.275
206000	0.325	1	1	0	0.15	0.55	0	0.05	0.375
206400	0.325	1	1	0	0.15	0.55	0	0.05	0.375
206800	0.325	1	1	0	0.15	0.625	0	0.05	0.35
207200	0.325	1	1	0	0.1	0.6	0	0.05	0.425
207600	0.325	1	1	0	0.1	0.5	0	0.05	0.425
208000	0.325	1	1	0	0.05	0.4	0	0.05	0.525
208400	0.4	1	1	0	0.05	0.4	0	0.05	0.525
208800	0.475	1	1	0	0.05	0.4	0	0.05	0.525
209200	0.475	1	1	0	0.05	0.4	0	0.05	0.525
209600	0.475	1	1	0	0.05	0.325	0	0.05	0.5
210000	0.4	1	1	0	0	0.225	0	0	0.4
210400	0.4	1	1	0	0	0.3	0	0.05	0.5
210800	0.4	1	1	0	0	0.225	0	0.05	0.5
211200	0.4	1	1	0	0	0.25	0.025	0.15	0.525
211600	0.4	1	1	0	0.05	0.35	0.025	0.15	0.525
212000	0.4	1	1	0	0.05	0.35	0.025	0.15	0.425
212400	0.325	1	1	0	0.05	0.35	0.025	0.15	0.525
212800	0.25	1	1	0	0.05	0.35	0.025	0.15	0.6
213200	0.25	1	1	0	0.05	0.425	0.025	0.15	0.6
213600	0.25	1	1	0	0.05	0.425	0.025	0.25	0.625
214000	0.25	1	1	0	0.05	0.425	0.025	0.25	0.625
214400	0.25	1	1	0	0.1	0.45	0.025	0.2	0.525
214800	0.25	1	1	0	0.1	0.45	0.025	0.2	0.45
215200	0.25	1	1	0	0.1	0.45	0	0.15	0.45
215600	0.25	1	1	0	0.05	0.35	0	0.15	0.375
216000	0.25	1	1	0	0.05	0.425	0	0.15	0.475
216400	0.25	1	1	0	0.05	0.425	0	0.15	0.375
216800	0.25	1	1	0	0.05	0.425	0	0.15	0.375
217200	0.25	1	1	0	0.05	0.45	0	0.15	0.375
217600	0.25	1	1	0	0.05	0.525	0	0.05	0.275
218000	0.25	1	1	0	0.05	0.6	0	0.05	0.275
218400	0.25	1	1	0	0	0.575	0	0.05	0.35
218800	0.25	1	1	0	0	0.575	0	0.05	0.35
219200	0.25	1	1	0	0	0.475	0	0	0.25
219600	0.25	1	1	0	0	0.475	0	0	0.25
220000	0.25	1	1	0	0	0.4	0	0	0.15
220400	0.25	1	1	0	0	0.4	0	0	0.15
220800	0.25	1	1	0	0	0.325	0	0	0.075
221200	0.25	1	1	0	0.1	0.325	0	0	0.075
221600	0.25	1	1	0	0.1	0.25	0	0	0.075
222000	0.25	1	1	0	0.1	0.175	0	0	0.15
222400	0.25	1	1	0	0.1	0.1	0	0	0.15
222800	0.25	1	1	0	0.15	0.2	0	0	0.15
223200	0.25	1	1	0	0.15	0.3	0	0	0.225
223600	0.25	1	1	0	0.15	0.3	0	0	0.225
224000	0.25	1	1	0	0.15	0.375	0	0	0.225
224400	0.25	1	1	0	0.2	0.475	0	0	0.3
224800	0.25	1	1	0	0.25	0.575	0	0.1	0.4
225200	0.25	1	1	0	0.15	0.575	0	0.1	0.4
225600	0.25	1	1	0	0.15	0.575	0	0.1	0.4
226000	0.25	1	1	0	0.2	0.675	0	0.1	0.4
226400	0.25	1	1	0	0.2	0.675	0	0.1	0.325
226800	0.25	1	1	0	0.15	0.65	0	0.1	0.4
227200	0.25	1	1	0	0.15	0.55	0	0.1	0.4
227600	0.25	1	1	0	0.15	0.55	0	0.1	0.4
228000	0.325	1	1	0	0.15	0.55	0	0.1	0.4
228400	0.325	1	1	0	0.1	0.525	0	0.1	0.325
228800	0.325	1	1	0	0.05	0.425	0	0	0.225
229200	0.325	1	1	0	0.05	0.325	0	0	0.3
229600	0.325	1	1	0	0.05	0.325	0	0	0.3
230000	0.325	1	1	0	0.05	0.325	0	0	0.225
230400	0.325	1	1	0	0.05	0.425	0	0	0.225
230800	0.325	1	1	0	0.05	0.35	0	0	0.15
231200	0.325	1	1	0	0.05	0.425	0	0	0.175
231600	0.325	1	1	0	0.05	0.425	0	0	0.175
232000	0.25	1	1	0	0.05	0.425	0	0	0.175
232400	0.25	1	1	0	0.05	0.45	0	0	0.275
232800	0.25	1	1	0	0.05	0.45	0	0	0.275
233200	0.25	1	1	0	0.05	0.525	0	0	0.2
233600	0.25	1	1	0	0.05	0.625	0	0	0.2
234000	0.25	1	1	0	0	0.6	0	0	0.2
234400	0.25	1	1	0	0	0.5	0	0	0.275
234800	0.25	1	1	0	0	0.575	0	0	0.275
235200	0.25	1	1	0	0	0.5	0	0	0.175
235600	0.25	1	1	0	0	0.5	0	0	0.25
236000	0.25	1	1	0	0	0.525	0	0	0.25
236400	0.25	1	1	0	0	0.5	0	0	0.15
236800	0.25	1	1	0	0	0.5	0	0	0.15
237200	0.25	1	1	0	0	0.525	0	0	0.15
237600	0.325	1	1	0	0	0.5	0	0	0.15
238000	0.325	1	1	0	0	0.425	0	0	0.15
238400	0.4	1	1	0	0	0.425	0	0	0.075
238800	0.4	1	1	0	0	0.425	0	0	0.15
239200	0.4	1	1	0	0.05	0.525	0	0	0.15
239600	0.475	1	1	0	0.05	0.525	0	0	0.175
240000	0.475	1	1	0	0.05	0.525	0	0	0.175
240400	0.475	1	1	0	0.05	0.525	0	0	0.275
240800	0.475	1	1	0	0.1	0.625	0	0	0.275
241200	0.475	1	1	0	0.1	0.6	0	0	0.275
241600	0.475	1	1	0	0.1	0.6	0	0	0.35
242000	0.475	1	1	0	0.1	0.7	0	0	0.425
242400	0.4	1	1	0	0.1	0.8	0	0	0.425
242800	0.475	1	1	0	0.1	0.725	0	0	0.35
243200	0.55	1	1	0	0.05	0.625	0	0	0.35
243600	0.55	1	1	0	0.05	0.725	0	0	0.25
244000	0.55	1	1	0	0.05	0.7	0	0	0.325
244400	0.55	1	1	0	0.05	0.625	0	0	0.225
244800	0.625	1	1	0	0	0.625	0	0	0.325
245200	0.625	1	1	0	0.05	0.65	0	0	0.325
245600	0.55	1	1	0	0.05	0.575	0	0	0.325
246000	0.55	1	1	0	0.05	0.475	0	0	0.25
246400	0.55	1	1	0	0.05	0.375	0	0	0.25
246800	0.475	1	1	0	0.05	0.45	0	0	0.325
247200	0.475	1	1	0	0.05	0.45	0	0	0.325
247600	0.4	1	1	0	0.05	0.425	0	0.05	0.425
248000	0.4	1	1	0	0.05	0.425	0	0.05	0.35
248400	0.4	1	1	0	0.05	0.525	0	0.05	0.425
248800	0.325	1	1	0.025	0.15	0.525	0	0.05	0.325
249200	0.325	1	1	0.025	0.1	0.425	0	0.05	0.325
249600	0.325	1	1	0.025	0.1	0.5	0	0.05	0.25
250000	0.4	1	1	0.025	0.1	0.6	0	0.05	0.325
250400	0.4	1	1	0.025	0.1	0.675	0	0.05	0.325
250800	0.4	1	1	0.025	0.1	0.675	0	0.1	0.35
251200	0.325	1	1	0.025	0.1	0.675	0	0.1	0.35
251600	0.325	1	1	0.025	0.1	0.675	0	0.05	0.25
252000	0.325	1	1	0.025	0.1	0.6	0	0.05	0.325
252400	0.4	1	1	0.025	0.15	0.6	0	0.05	0.25
252800	0.4	1	1	0	0.05	0.5	0	0.05	0.25
253200	0.4	1	1	0	0.05	0.6	0	0.05	0.25
253600	0.475	1	1	0	0.05	0.6	0	0.05	0.325
254000	0.4	1	1	0	0.05	0.6	0	0.05	0.25
254400	0.4	1	1	0	0.05	0.625	0	0.05	0.25
254800	0.4	1	1	0	0.05	0.55	0	0	0.225
255200	0.4	1	1	0	0.1	0.65	0	0	0.3
255600	0.4	1	1	0	0.1	0.65	0	0	0.3
256000	0.4	1	1	0	0.2	0.75	0	0	0.225
256400	0.325	1	1	0	0.15	0.65	0	0	0.3
256800	0.325	1	1	0	0.15	0.725	0	0	0.4
257200	0.325	1	1	0	0.15	0.625	0	0	0.5
257600	0.325	1	1	0	0.15	0.65	0	0	0.425
258000	0.325	1	1	0	0.15	0.55	0	0	0.425
258400	0.325	1	1	0	0.15	0.525	0	0	0.425
258800	0.325	1	1	0	0.15	0.625	0	0	0.35
259200	0.4	1	1	0	0.1	0.525	0	0	0.275
259600	0.4	1	1	0	0.1	0.45	0	0	0.275
260000	0.4	1	1	0	0.05	0.45	0	0	0.275
260400	0.4	1	1	0	0.05	0.525	0	0.05	0.3
260800	0.4	1	1	0	0.05	0.55	0	0.05	0.2
261200	0.4	1	1	0	0.05	0.55	0	0.05	0.1
261600	0.325	1	1	0	0.05	0.55	0	0.05	0.175
262000	0.325	1	1	0	0.05	0.625	0	0.05	0.275
262400	0.325	1	1	0	0.05	0.55	0	0.05	0.275
262800	0.4	1	1	0	0.05	0.45	0	0.05	0.275
263200	0.4	1	1	0	0.1	0.55	0	0.05	0.35
263600	0.475	1	1	0	0.1	0.55	0	0.05	0.35
264000	0.475	1	1	0	0.05	0.45	0	0.05	0.35
264400	0.475	1	1	0	0.05	0.375	0	0	0.35
264800	0.55	1	1	0	0.05	0.275	0	0.05	0.45
265200	0.625	1	1	0	0.05	0.375	0	0.05	0.45
265600	0.625	1	1	0	0.15	0.375	0	0.05	0.475
266000	0.625	1	1	0	0.15	0.3	0	0.05	0.375
266400	0.625	1	1	0	0.15	0.3	0	0.05	0.375
266800	0.55	1	1	0	0.15	0.3	0	0.05	0.45
267200	0.475	1	1	0.025	0.2	0.3	0	0.05	0.375
267600	0.4	1	1	0.025	0.2	0.375	0	0.05	0.45
268000	0.475	1	1	0.025	0.2	0.375	0	0.05	0.525
268400	0.55	1	1	0.025	0.2	0.475	0	0.05	0.425
268800	0.475	1	1	0.025	0.2	0.475	0	0	0.425
269200	0.4	1	1	0.025	0.2	0.375	0	0	0.5
269600	0.4	1	1	0.025	0.1	0.35	0	0.05	0.5
270000	0.4	1	1	0.025	0.1	0.35	0	0.15	0.6
270400	0.475	1	1	0.025	0.1	0.45	0	0.15	0.6
270800	0.475	1	1	0.025	0.1	0.45	0	0.15	0.525
271200	0.55	1	1	0	0	0.425	0	0.15	0.6
271600	0.55	1	1	0	0	0.425	0	0.15	0.625
272000	0.55	1	1	0	0	0.425	0	0.15	0.625
272400	0.55	1	1	0	0	0.325	0	0.15	0.625
272800	0.625	1	1	0	0	0.325	0	0.15	0.6
273200	0.7	1	1	0	0	0.425	0	0.15	0.525
273600	0.775	1	1	0	0	0.35	0	0.1	0.425
274000	0.85	1	1	0	0.05	0.45	0	0	0.325
274400	0.85	1	1	0	0.05	0.425	0	0	0.325
274800	0.925	1	1	0	0.05	0.425	0	0	0.4
275200	0.925	1	1	0	0.05	0.45	0	0	0.325
275600	1	1	1	0	0.05	0.375	0	0	0.225
276000	1	1	1	0	0.05	0.475	0	0	0.15
276400	1	1	1	0	0.05	0.55	0	0	0.15
276800	1	1	1	0	0.05	0.625	0	0	0.175
277200	1	1	1	0	0.05	0.525	0	0	0.175
277600	1	1	1	0	0.05	0.525	0	0	0.25
278000	1	1	1	0	0	0.425	0	0	0.325
278400	1	1	1	0	0	0.35	0	0	0.325
278800	1	1	1	0	0	0.35	0	0	0.35
279200	1	1	1	0	0	0.325	0	0	0.35
279600	1	1	1	0	0	0.325	0	0	0.35
280000	1	1	1	0	0	0.3	0	0	0.35
280400	1	1	1	0	0	0.225	0	0	0.35
280800	1	1	1	0	0	0.15	0	0	0.35
281200	1	1	1	0	0	0.15	0	0	0.45
281600	1	1	1	0	0	0.15	0	0	0.375
282000	1	1	1	0	0	0.15	0	0	0.3
282400	1	1	1	0	0	0.25	0	0	0.375
282800	1	1	1	0	0	0.25	0	0	0.275
283200	1	1	1	0	0	0.275	0	0	0.35
283600	1	1	1	0	0	0.275	0	0	0.35
284000	1	1	1	0	0	0.2	0	0.05	0.45
284400	1	1	1	0	0	0.3	0	0.1	0.55
284800	1	1	1	0	0.1	0.4	0	0.1	0.525
285200	1	1	1	0	0.1	0.4	0	0.1	0.425
285600	1	1	1	0	0.1	0.4	0	0.1	0.425
286000	1	1	1	0	0.1	0.475	0	0.15	0.525
286400	1	1	1	0	0.1	0.375	0	0.15	0.45
286800	1	1	1	0	0.1	0.375	0	0.15	0.45
287200	1	1	1	0	0.1	0.375	0	0.15	0.475
287600	1	1	1	0	0.1	0.45	0	0.15	0.475
288000	1	1	1	0	0.1	0.45	0	0.1	0.475
288400	1	1	1	0	0.1	0.425	0	0.05	0.375
288800	1	1	1	0	0	0.325	0	0.05	0.3
289200	1	1	1	0	0	0.425	0	0.05	0.375
289600	1	1	1	0	0	0.425	0	0.05	0.45
290000	1	1	1	0	0	0.35	0	0	0.35
290400	1	1	1	0	0.1	0.45	0	0	0.425
290800	1	1	1	0	0.1	0.45	0	0	0.525
291200	1	1	1	0	0.1	0.35	0	0	0.5
291600	1	1	1	0	0.1	0.275	0	0	0.575
292000	1	1	1	0	0.1	0.35	0	0	0.475
292400	1	1	1	0	0.1	0.275	0	0	0.55
292800	1	1	1	0	0.1	0.35	0	0	0.625
293200	1	1	1	0	0.1	0.325	0	0	0.65
293600	1	1	1	0	0.15	0.425	0	0	0.65
294000	1	1	1	0	0.15	0.5	0	0	0.75
294400	1	1	1	0	0.05	0.4	0.025	0.1	0.775
294800	1	1	1	0	0.05	0.475	0.025	0.1	0.775
295200	1	1	1	0	0.05	0.475	0.025	0.1	0.7
295600	1	1	1	0	0.05	0.475	0.025	0.1	0.625
296000	1	1	1	0	0.05	0.4	0.025	0.1	0.7
296400	1	1	1	0	0.15	0.5	0.025	0.1	0.625
296800	1	1	1	0	0.15	0.425	0.025	0.1	0.55
297200	1	1	1	0	0.15	0.425	0.025	0.1	0.55
297600	1	1	1	0	0.1	0.325	0.025	0.1	0.475
298000	1	1	1	0	0.1	0.35	0.025	0.1	0.375
298400	1	1	1	0	0.1	0.425	0	0	0.275
298800	1	1	1	0	0.1	0.425	0	0	0.25
299200	1	1	1	0	0.15	0.525	0	0	0.325
299600	1	1	1	0	0.15	0.525	0	0	0.425
300000	1	1	1	0	0.15	0.525	0	0	0.45
300400	1	1	1	0	0.05	0.425	0	0	0.45
300800	1	1	1	0	0.05	0.425	0	0	0.525
301200	1	1	1	0	0.05	0.35	0	0	0.425
301600	1	1	1	0	0.05	0.45	0	0.05	0.525
302000	1	1	1	0	0.05	0.425	0	0.05	0.525
302400	1	1	1	0	0.05	0.45	0	0.05	0.525
302800	1	1	1	0	0.05	0.375	0	0.05	0.45
303200	1	1	1	0	0	0.35	0	0.05	0.375
303600	1	1	1	0	0	0.35	0	0.05	0.275
304000	1	1	1	0	0	0.35	0	0.1	0.275
304400	1	1	1	0	0	0.45	0	0.1	0.35
304800	1	1	1	0	0	0.45	0	0.1	0.275
305200	1	1	1	0	0	0.45	0	0.1	0.275
305600	1	1	1	0	0	0.35	0	0.05	0.175
306000	1	1	1	0	0	0.35	0	0.05	0.25
306400	1	1	1	0	0	0.25	0	0.05	0.25
306800	1	1	1	0	0	0.325	0	0.05	0.35
307200	1	1	1	0	0	0.35	0	0.05	0.35
307600	1	1	1	0	0	0.45	0	0.05	0.35
308000	1	1	1	0	0	0.45	0	0	0.325
308400	1	1	1	0	0	0.425	0	0	0.25
308800	1	1	1	0	0	0.425	0	0	0.25
309200	1	1	1	0	0	0.425	0	0	0.25
309600	1	1	1	0	0	0.425	0	0	0.325
310000	1	1	1	0	0	0.35	0	0	0.25
310400	1	1	1	0	0	0.425	0	0	0.325
310800	1	1	1	0	0	0.45	0	0	0.325
311200	1	1	1	0	0	0.35	0	0	0.4
311600	1	1	1	0	0	0.25	0	0	0.5
312000	1	1	1	0	0	0.35	0	0	0.425
312400	1	1	1	0	0	0.35	0	0	0.425
312800	1	1	1	0	0	0.45	0	0	0.425
313200	1	1	1	0	0	0.45	0	0	0.425
313600	1	1	1	0	0	0.45	0	0	0.425
314000	1	1	1	0	0	0.45	0	0	0.425
314400	1	1	1	0	0	0.375	0	0	0.35
314800	1	1	1	0	0	0.275	0	0	0.25
315200	1	1	1	0	0	0.275	0	0	0.175
315600	1	1	1	0	0	0.275	0	0	0.075
316000	1	1	1	0	0.05	0.275	0	0	0.075
316400	1	1	1	0	0.05	0.2	0	0	0.075
316800	1	1	1	0	0.05	0.175	0	0	0.075
317200	1	1	1	0	0.05	0.25	0	0	0.15
317600	1	1	1	0	0.05	0.325	0	0	0.15
318000	1	1	1	0	0.05	0.325	0	0	0.15
318400	1	1	1	0	0.05	0.425	0	0	0.15
318800	1	1	1	0	0.05	0.525	0	0	0.25
319200	1	1	1	0	0.05	0.6	0	0	0.25
319600	1	1	1	0	0.05	0.675	0	0	0.325
320000	1	1	1	0	0	0.575	0	0	0.325
320400	1	1	1	0	0	0.675	0	0	0.325
320800	1	1	1	0	0	0.6	0	0	0.325
321200	1	1	1	0	0	0.525	0	0	0.25
321600	1	1	1	0	0	0.45	0	0	0.175
322000	1	1	1	0	0	0.45	0	0	0.175
322400	1	1	1	0	0	0.35	0	0	0.175
322800	1	1	1	0	0	0.325	0	0.05	0.175
323200	1	1	1	0	0	0.35	0	0.05	0.25
323600	1	1	1	0	0	0.275	0	0.05	0.275
324000	1	1	1	0	0	0.275	0	0.05	0.375
324400	1	1	1	0	0	0.275	0	0.05	0.375
324800	1	1	1	0	0	0.35	0	0.05	0.375
325200	1	1	1	0	0.05	0.45	0	0.05	0.45
325600	1	1	1	0	0.05	0.45	0	0.05	0.45
326000	1	1	1	0	0.05	0.525	0	0.05	0.45
326400	1	1	1	0	0.05	0.625	0	0.05	0.45
326800	1	1	1	0	0.05	0.625	0	0.05	0.45
327200	1	1	1	0	0.05	0.525	0	0.05	0.375
327600	1	1	1	0	0.05	0.525	0	0.05	0.275
328000	1	1	1	0	0.05	0.525	0	0.05	0.175
328400	1	1	1	0.025	0.15	0.525	0	0.05	0.175
328800	1	1	1	0.025	0.15	0.55	0	0.05	0.175
329200	1	1	1	0.025	0.1	0.525	0	0.05	0.1
329600	1	1	1	0.025	0.2	0.625	0	0.05	0.175
330000	1	1	1	0.025	0.2	0.55	0	0.05	0.175
330400	1	1	1	0.025	0.3	0.55	0	0.05	0.175
330800	1	1	1	0.025	0.3	0.475	0	0	0.175
331200	1	1	1	0.025	0.3	0.55	0	0	0.25
331600	1	1	1	0.025	0.3	0.55	0	0	0.25
332000	1	1	1	0.025	0.3	0.625	0	0.05	0.35
332400	1	1	1	0	0.25	0.625	0	0.05	0.45
332800	1	1	1	0	0.25	0.525	0	0.05	0.525
333200	1	1	1	0	0.25	0.525	0	0.05	0.625
333600	1	1	1	0	0.25	0.525	0	0.05	0.55
334000	1	1	1	0	0.25	0.6	0	0.05	0.625
334400	1	1	1	0	0.15	0.5	0	0.05	0.725
334800	1	1	1	0	0.15	0.5	0	0.05	0.7
335200	1	1	1	0	0.15	0.5	0	0.05	0.625
335600	1	1	1	0	0.15	0.575	0	0.05	0.625
336000	1	1	1	0	0.15	0.6	0	0	0.525
336400	1	1	1	0	0.1	0.5	0	0	0.425
336800	1	1	1	0	0.1	0.5	0	0	0.425
337200	1	1	1	0	0.1	0.5	0	0	0.325
337600	1	1	1	0	0	0.4	0	0	0.425
338000	1	1	1	0	0	0.4	0	0.1	0.45
338400	1	1	1	0	0	0.4	0	0.1	0.45
338800	1	1	1	0	0	0.4	0	0.1	0.45
339200	1	1	1	0	0	0.325	0	0.1	0.45
339600	1	1	1	0	0	0.25	0	0.1	0.45
340000	1	1	1	0	0	0.25	0	0.1	0.45
340400	1	1	1	0	0	0.25	0	0.1	0.525
340800	1	1	1	0	0	0.325	0	0.1	0.45
341200	1	1	1	0	0	0.25	0	0.1	0.45
341600	1	1	1	0	0	0.25	0	0.1	0.425
342000	1	1	1	0	0	0.25	0	0	0.4
342400	1	1	1	0	0	0.325	0	0	0.375
342800	1	1	1	0	0	0.325	0	0	0.3
343200	1	1	1	0	0	0.4	0	0	0.3
343600	1	1	1	0	0	0.4	0	0	0.3
344000	1	1	1	0	0.05	0.4	0	0	0.4
344400	1	1	1	0	0.05	0.475	0	0	0.4
344800	1	1	1	0	0.05	0.475	0	0	0.4
345200	1	1	1	0	0.1	0.575	0	0	0.4
345600	1	1	1	0	0.1	0.65	0	0	0.325
346000	1	1	1	0	0.1	0.575	0	0	0.25
346400	1	1	1	0	0.15	0.6	0	0	0.175
346800	1	1	1	0	0.2	0.7	0	0	0.25
347200	1	1	1	0	0.2	0.7	0	0	0.325
347600	1	1	1	0	0.2	0.7	0	0	0.325
348000	1	1	1	0	0.15	0.675	0	0	0.225
348400	1	1	1	0	0.15	0.675	0	0	0.15
348800	1	1	1	0	0.15	0.6	0	0	0.15
349200	1	1	1	0	0.1	0.5	0	0	0.225
349600	1	1	1	0	0.1	0.425	0	0	0.225
350000	1	1	1	0	0.15	0.525	0	0	0.325
350400	1	1	1	0	0.1	0.425	0	0	0.325
350800	1	1	1	0	0.05	0.325	0	0	0.25
351200	1	1	1	0	0.05	0.25	0	0	0.175
351600	1	1	1	0	0.05	0.25	0	0	0.175
352000	1	1	1	0	0.05	0.25	0	0	0.175
352400	1	1	1	0	0.05	0.25	0	0	0.175
352800	1	1	1	0	0.05	0.25	0	0	0.175
353200	1	1	1	0	0.05	0.25	0	0	0.1
353600	1	1	1	0	0.05	0.35	0	0	0.1
354000	1	1	1	0	0	0.35	0	0	0
354400	1	1	1	0	0	0.35	0	0	0
354800	1	1	1	0	0	0.425	0	0	0
355200	1	1	1	0	0	0.425	0	0	0
355600	1	1	1	0	0	0.425	0	0	0
356000	1	1	1	0	0	0.45	0.025	0.1	0.1
356400	1	1	1	0	0	0.475	0.025	0.1	0.1
356800	1	1	1	0	0	0.575	0.025	0.1	0.2
357200	1	1	1	0	0	0.575	0.025	0.15	0.3
357600	1	1	1	0	0	0.475	0.025	0.15	0.3
358000	1	1	1	0	0	0.475	0.025	0.15	0.3
358400	1	1	1	0	0	0.475	0.025	0.15	0.3
358800	1	1	1	0	0	0.4	0.025	0.15	0.375
359200	1	1	1	0	0	0.475	0.025	0.15	0.375
359600	1	1	1	0	0.05	0.575	0.025	0.15	0.375
360000	1	1	1	0	0.05	0.575	0	0.05	0.275
360400	1	1	1	0	0.05	0.475	0	0.05	0.275
360800	1	1	1	0	0.1	0.475	0	0.05	0.175
361200	1	1	1	0	0.1	0.575	0	0	0.075
361600	1	1	1	0	0.1	0.575	0	0	0.15
362000	1	1	1	0	0.1	0.55	0	0	0.15
362400	1	1	1	0	0.1	0.55	0	0	0.15
362800	1	1	1	0	0.1	0.55	0	0	0.075
363200	1	1	1	0	0.1	0.475	0	0.05	0.175
363600	1	1	1	0	0.05	0.375	0	0.05	0.275
364000	1	1	1	0	0.05	0.275	0	0.05	0.275
364400	1	1	1	0	0.05	0.275	0	0.05	0.275
364800	1	1	1	0	0	0.175	0	0.05	0.275
365200	1	1	1	0	0.05	0.175	0	0.05	0.275
365600	1	1	1	0	0.05	0.175	0	0.05	0.2
366000	1	1	1	0	0.05	0.1	0	0.05	0.3
366400	1	1	1	0	0.05	0.2	0	0.05	0.3
366800	1	1	1	0	0.05	0.275	0	0.05	0.3
367200	1	1	1	0	0.05	0.275	0	0	0.2
367600	1	1	1	0	0.05	0.275	0	0	0.175
368000	1	1	1	0	0.05	0.275	0	0	0.175
368400	1	1	1	0	0.05	0.35	0	0	0.175
368800	1	1	1	0	0.05	0.35	0	0	0.175
369200	1	1	1	0	0	0.325	0	0	0.275
369600	1	1	1	0	0	0.325	0	0	0.35
370000	1	1	1	0	0.05	0.425	0	0	0.35
370400	1	1	1	0	0.05	0.325	0	0	0.35
370800	1	1	1	0	0.05	0.25	0	0	0.425
371200	1	1	1	0	0.05	0.325	0	0	0.5
371600	1	1	1	0	0.15	0.425	0	0	0.425
372000	1	1	1	0	0.15	0.425	0	0	0.5
372400	1	1	1	0	0.15	0.35	0	0	0.575
372800	1	1	1	0	0.15	0.35	0	0	0.575
373200	1	1	1	0	0.15	0.375	0	0	0.55
373600	1	1	1	0	0.15	0.375	0	0	0.55
374000	1	1	1	0	0.1	0.275	0	0	0.45
374400	1	1	1	0	0.1	0.275	0	0	0.525
374800	1	1	1	0	0.1	0.35	0	0	0.45
375200	1	1	1	0	0.1	0.35	0	0	0.375
375600	1	1	1	0	0	0.25	0	0	0.375
376000	1	1	1	0	0	0.35	0	0	0.4
376400	1	1	1	0	0	0.35	0	0	0.425
376800	1	1	1	0	0	0.45	0	0	0.425
377200	1	1	1	0	0	0.45	0	0	0.35
377600	1	1	1	0	0	0.45	0	0	0.35
378000	1	1	1	0	0	0.45	0	0	0.425
378400	1	1	1	0	0	0.45	0	0	0.425
378800	1	1	1	0	0.05	0.475	0	0	0.425
379200	1	1	1	0	0.05	0.475	0	0	0.425
379600	1	1	1	0	0.1	0.575	0	0	0.5
380000	1	1	1	0	0.1	0.475	0	0	0.475
380400	1	1	1	0	0.1	0.55	0	0	0.375
380800	1	1	1	0	0.1	0.45	0	0	0.45
381200	1	1	1	0	0.1	0.35	0	0	0.525
381600	1	1	1	0	0.1	0.35	0	0	0.55
382000	1	1	1	0	0.1	0.425	0	0	0.475
382400	1	1	1	0	0.1	0.425	0	0	0.4
382800	1	1	1	0	0.05	0.325	0	0	0.4
383200	1	1	1	0	0.05	0.25	0	0	0.475
383600	1	1	1	0	0	0.225	0	0	0.4
384000	1	1	1	0	0	0.3	0	0	0.4
384400	1	1	1	0	0	0.225	0	0	0.4
384800	1	1	1	0	0	0.325	0	0	0.4
385200	1	1	1	0	0	0.325	0	0	0.325
385600	1	1	1	0	0	0.325	0	0	0.3
386000	1	1	1	0	0	0.325	0	0	0.3
386400	1	1	1	0	0.05	0.425	0	0	0.3
386800	1	1	1	0	0.05	0.425	0	0	0.3
387200	1	1	1	0	0.05	0.525	0	0	0.225
387600	1	1	1	0	0.05	0.45	0	0	0.3
388000	1	1	1	0	0.05	0.375	0	0	0.225
388400	1	1	1	0	0.05	0.45	0	0	0.225
388800	1	1	1	0	0.05	0.35	0	0	0.15
389200	1	1	1	0	0.05	0.425	0	0	0.15
389600	1	1	1	0	0.05	0.5	0	0	0.15
390000	1	1	1	0	0.05	0.525	0	0	0.15
390400	1	1	1	0	0	0.525	0	0	0.15
390800	1	1	1	0	0	0.525	0	0	0.15
391200	1	1	1	0	0	0.525	0	0	0.15
391600	1	1	1	0	0	0.525	0	0	0.075
392000	1	1	1	0	0	0.525	0	0	0.15
392400	1	1	1	0	0	0.55	0	0	0.225
392800	1	1	1	0	0	0.65	0	0	0.225
393200	1	1	1	0	0	0.65	0	0	0.225
393600	1	1	1	0	0	0.575	0	0	0.15
394000	1	1	1	0	0.05	0.575	0	0	0.15
394400	1	1	1	0	0.1	0.575	0	0	0.225
394800	1	1	1	0	0.1	0.675	0	0	0.325
395200	1	1	1	0	0.1	0.575	0	0	0.325
395600	1	1	1	0	0.1	0.65	0	0	0.4
396000	1	1	1	0	0.1	0.65	0	0	0.325
396400	1	1	1	0	0.1	0.625	0	0	0.35
396800	1	1	1	0	0.1	0.525	0	0	0.45
397200	1	1	1	0	0.1	0.45	0	0	0.45
397600	1	1	1	0	0.1	0.55	0	0	0.55
398000	1	1	1	0	0.05	0.55	0	0	0.55
398400	1	1	1	0	0	0.45	0	0	0.475
398800	1	1	1	0	0	0.45	0	0	0.375
399200	1	1	1	0	0	0.45	0	0	0.375
399600	1	1	1	0	0	0.475	0	0	0.375
400000	1	1	1	0	0	0.475	0	0	0.375

## Sheet: t8
0	0	0	0	0	0	0	0	0	0
400	0	0	0	0	0	0	0	0	0
800	0	0	0	0	0	0.5	0	0	0
1200	0	0	0	0	0	0.333333	0	0	0
1600	0	0	0	0	0	0.25	0	0	0
2000	0	0	0	0	0	0.2	0	0	0
2400	0	0	0	0	0	0.166667	0	0	0
2800	0	0	0	0	0	0.142857	0	0	0
3200	0	0	0	0	0	0.125	0	0	0
3600	0	0	0	0	0.0555556	0.222222	0	0	0
4000	0	0	0	0	0.05	0.275	0	0	0
4400	0	0	0	0	0.05	0.275	0	0	0
4800	0	0	0	0	0.05	0.25	0	0	0
5200	0	0	0	0	0.05	0.25	0	0	0
5600	0	0	0	0	0.05	0.25	0	0	0
6000	0	0	0	0	0.05	0.25	0	0	0
6400	0	0	0	0	0.05	0.35	0	0	0
6800	0	0	0	0	0.05	0.45	0	0	0
7200	0	0	0	0	0.05	0.525	0	0	0
7600	0	0	0	0	0	0.425	0	0	0
8000	0	0	0	0	0	0.425	0	0	0
8400	0	0	0	0	0	0.5	0	0	0
8800	0	0	0	0	0	0.425	0	0	0
9200	0	0	0	0	0	0.5	0	0	0
9600	0	0	0	0	0	0.5	0	0	0
10000	0	0	0	0	0	0.5	0	0	0
10400	0	0	0	0	0	0.475	0	0	0
10800	0	0	0	0	0	0.375	0	0	0
11200	0	0	0	0	0	0.375	0	0	0
11600	0	0	0	0	0	0.45	0	0	0.075
12000	0	0	0	0	0	0.375	0	0	0.15
12400	0	0	0	0	0	0.3	0	0	0.15
12800	0	0	0	0	0	0.375	0	0	0.15
13200	0	0	0	0	0	0.3	0	0	0.15
13600	0	0	0	0	0	0.3	0	0	0.15
14000	0	0	0	0	0	0.375	0	0	0.15
14400	0	0	0	0	0	0.375	0	0	0.15
14800	0	0	0	0	0	0.45	0	0	0.15
15200	0	0	0	0	0	0.375	0	0	0.15
15600	0	0	0	0	0	0.3	0	0	0.075
16000	0	0	0	0	0	0.3	0	0	0
16400	0	0	0	0	0	0.375	0	0	0
16800	0	0	0	0	0	0.3	0	0	0
17200	0	0	0	0	0	0.4	0	0	0
17600	0	0	0	0	0	0.475	0	0	0
18000	0	0	0	0	0	0.5	0	0	0
18400	0	0	0	0	0	0.425	0	0	0
18800	0	0	0	0	0	0.425	0	0	0.075
19200	0	0	0	0	0	0.425	0	0	0.075
19600	0	0	0	0	0.05	0.525	0	0	0.075
20000	0	0	0	0	0.05	0.625	0	0	0.075
20400	0	0	0	0	0.05	0.55	0	0	0.075
20800	0	0	0	0	0.05	0.65	0	0	0.075
21200	0	0	0	0	0.05	0.55	0	0	0.075
21600	0	0	0	0	0.05	0.575	0	0	0.15
22000	0	0	0	0	0.05	0.475	0	0	0.225
22400	0	0	0	0	0.05	0.475	0	0	0.225
22800	0	0	0	0	0.05	0.4	0	0	0.25
23200	0	0	0	0	0.05	0.4	0	0	0.25
23600	0	0	0	0	0	0.3	0	0	0.25
24000	0	0	0	0	0	0.2	0	0	0.25
24400	0	0	0	0	0	0.2	0	0	0.25
24800	0	0	0	0	0	0.1	0	0	0.25
25200	0	0	0	0	0	0.175	0	0	0.325
25600	0	0	0	0	0	0.15	0	0	0.25
26000	0	0	0	0	0	0.15	0	0	0.175
26400	0	0	0	0	0	0.15	0	0	0.175
26800	0	0	0	0	0	0.15	0	0	0.075
27200	0	0	0	0	0.05	0.25	0	0	0.15
27600	0	0	0	0	0.05	0.25	0	0	0.15
28000	0	0	0	0	0.05	0.35	0	0	0.225
28400	0	0	0	0	0.15	0.45	0	0	0.325
28800	0	0	0	0	0.15	0.45	0	0	0.4
29200	0	0	0	0	0.15	0.45	0	0	0.425
29600	0	0	0	0	0.15	0.375	0	0	0.425
30000	0	0	0	0	0.15	0.475	0	0	0.425
30400	0	0	0	0	0.15	0.55	0	0	0.425
30800	0	0	0	0	0.15	0.625	0	0	0.5
31200	0	0	0	0	0.1	0.525	0	0	0.425
31600	0	0	0	0	0.1	0.525	0	0	0.425
32000	0	0	0	0	0.1	0.5	0	0	0.35
32400	0	0	0	0	0	0.475	0	0	0.25
32800	0	0	0	0	0	0.475	0	0	0.175
33200	0	0	0	0	0	0.4	0	0	0.075
33600	0	0	0	0	0	0.4	0	0	0.075
34000	0	0	0	0	0	0.4	0	0	0.075
34400	0	0	0	0	0	0.4	0	0	0.075
34800	0	0	0	0	0	0.325	0	0	0
35200	0	0	0	0	0	0.325	0	0	0
35600	0	0	0	0	0	0.425	0	0	0
36000	0	0	0	0	0	0.35	0	0	0.1
36400	0	0	0	0	0	0.275	0	0	0.2
36800	0	0	0	0	0	0.35	0	0	0.2
37200	0	0	0	0	0	0.425	0	0	0.2
37600	0	0	0	0	0	0.5	0	0	0.2
38000	0	0	0	0	0	0.5	0	0	0.275
38400	0	0	0	0	0	0.425	0	0	0.275
38800	0	0	0	0	0	0.525	0	0	0.275
39200	0	0	0	0	0	0.525	0	0	0.35
39600	0	0	0	0	0	0.425	0	0	0.35
40000	0	0	0	0	0	0.5	0	0	0.25
40400	0	0	0	0	0	0.5	0	0	0.15
40800	0	0	0	0	0	0.5	0	0	0.15
41200	0	0	0	0	0	0.5	0	0	0.15
41600	0	0	0	0	0	0.425	0	0	0.15
42000	0	0	0	0	0	0.325	0	0	0.15
42400	0	0	0	0	0	0.325	0	0	0.225
42800	0	0	0	0	0	0.225	0	0	0.225
43200	0	0	0	0	0	0.225	0	0	0.15
43600	0	0	0	0	0	0.3	0	0	0.15
44000	0	0	0	0	0	0.325	0	0	0.15
44400	0	0	0	0	0	0.4	0	0	0.15
44800	0	0	0	0	0	0.4	0	0	0.15
45200	0	0	0	0	0	0.4	0	0	0.15
45600	0	0	0	0	0	0.4	0	0	0.15
46000	0	0	0	0	0	0.4	0	0	0.075
46400	0	0	0	0	0	0.4	0	0	0
46800	0	0	0	0	0	0.4	0	0	0
47200	0	0	0	0	0	0.4	0	0	0
47600	0	0	0	0	0	0.425	0	0	0.1
48000	0	0	0	0	0	0.4	0	0	0.2
48400	0	0	0	0	0	0.325	0	0	0.275
48800	0	0	0	0	0	0.25	0	0	0.35
49200	0	0	0	0	0	0.175	0	0	0.425
49600	0	0	0	0	0	0.175	0	0	0.5
50000	0	0	0	0	0	0.175	0	0	0.5
50400	0	0	0	0	0	0.175	0	0	0.5
50800	0	0	0	0	0	0.175	0	0	0.5
51200	0	0	0	0	0	0.25	0	0	0.5
51600	0	0	0	0	0	0.225	0	0	0.4
52000	0	0	0	0	0	0.15	0	0	0.375
52400	0	0	0	0	0	0.15	0	0	0.3
52800	0	0	0	0	0	0.15	0	0	0.225
53200	0	0	0	0	0	0.15	0	0	0.15
53600	0	0	0	0	0	0.225	0	0	0.15
54000	0	0	0	0	0	0.225	0	0	0.225
54400	0	0	0	0	0	0.225	0	0	0.225
54800	0	0	0	0	0	0.225	0	0	0.225
55200	0	0	0	0	0	0.15	0	0	0.3
55600	0	0	0	0	0	0.175	0	0	0.375
56000	0	0	0	0	0	0.175	0	0	0.3
56400	0	0	0	0	0	0.175	0	0	0.3
56800	0	0	0	0	0	0.25	0	0	0.3
57200	0	0	0	0	0	0.325	0	0	0.375
57600	0	0	0	0	0	0.25	0	0	0.375
58000	0	0	0	0	0	0.325	0	0.1	0.4
58400	0	0	0	0	0	0.4	0	0.1	0.4
58800	0	0	0	0	0	0.4	0	0.1	0.475
59200	0	0	0	0	0	0.4	0	0.1	0.5
59600	0	0	0	0	0	0.3	0	0.1	0.425
60000	0	0	0	0	0	0.4	0	0.1	0.425
60400	0	0	0	0	0	0.4	0	0.1	0.425
60800	0	0	0	0	0	0.325	0	0.1	0.425
61200	0	0	0	0	0	0.25	0	0.1	0.35
61600	0	0	0	0	0	0.35	0	0.1	0.275
62000	0	0	0	0	0	0.275	0	0	0.275
62400	0	0	0	0	0	0.2	0	0	0.275
62800	0	0	0	0	0.05	0.3	0	0	0.3
63200	0	0	0	0	0.1	0.4	0	0	0.2
63600	0	0	0	0	0.1	0.4	0	0	0.275
64000	0	0	0	0	0.1	0.3	0	0	0.275
64400	0	0	0	0	0.1	0.3	0	0	0.275
64800	0	0	0	0	0.1	0.3	0	0	0.275
65200	0	0	0	0	0.1	0.3	0	0	0.375
65600	0	0	0	0	0.1	0.2	0	0	0.45
66000	0	0	0	0	0.1	0.275	0	0	0.35
66400	0	0	0	0	0.1	0.275	0	0	0.35
66800	0	0	0	0	0.05	0.175	0	0	0.25
67200	0	0	0	0	0	0.075	0	0.1	0.35
67600	0	0	0	0	0	0.075	0	0.1	0.375
68000	0	0	0	0	0	0.075	0	0.1	0.375
68400	0	0	0	0	0	0.075	0	0.1	0.475
68800	0	0	0	0	0	0.15	0	0.15	0.575
69200	0	0	0	0	0	0.15	0	0.15	0.475
69600	0	0	0	0	0	0.15	0	0.15	0.4
70000	0	0	0	0	0	0.15	0	0.15	0.4
70400	0	0	0	0	0	0.15	0	0.15	0.5
70800	0	0	0	0	0	0.15	0	0.15	0.5
71200	0	0	0	0	0	0.15	0	0.05	0.4
71600	0	0	0	0	0	0.225	0	0.05	0.3
72000	0	0	0	0	0	0.225	0	0.05	0.3
72400	0	0	0	0	0	0.225	0	0.05	0.2
72800	0	0	0	0	0	0.225	0	0	0.175
73200	0	0	0	0	0	0.225	0	0	0.25
73600	0	0	0	0	0	0.3	0	0	0.25
74000	0	0	0	0	0	0.225	0	0	0.25
74400	0	0	0	0	0	0.225	0	0	0.15
74800	0	0	0	0	0	0.3	0	0	0.15
75200	0	0	0	0	0	0.3	0	0	0.15
75600	0	0	0	0	0.05	0.325	0	0	0.25
76000	0	0	0	0	0.05	0.325	0	0	0.325
76400	0	0	0	0	0.05	0.325	0	0	0.4
76800	0	0	0	0	0.05	0.325	0	0	0.4
77200	0	0	0	0	0.05	0.325	0	0	0.4
77600	0	0	0	0	0.05	0.25	0	0	0.5
78000	0	0	0	0	0.05	0.25	0	0	0.575
78400	0	0	0	0	0.05	0.325	0	0	0.575
78800	0	0	0	0	0.05	0.325	0	0	0.575
79200	0	0	0	0	0.05	0.325	0	0	0.675
79600	0	0	0	0	0	0.225	0	0	0.575
80000	0	0	0	0	0	0.225	0	0	0.5
80400	0	0	0	0	0.05	0.325	0	0	0.425
80800	0	0	0.075	0	0.05	0.25	0	0	0.35
81200	0	0	0.15	0	0.05	0.25	0	0	0.275
81600	0	0	0.15	0	0.15	0.35	0	0	0.175
82000	0	0	0.15	0	0.15	0.35	0	0	0.1
82400	0	0	0.225	0	0.15	0.275	0	0	0.175
82800	0	0	0.225	0	0.15	0.2	0	0	0.175
83200	0	0	0.3	0	0.15	0.2	0	0	0.075
83600	0	0	0.3	0	0.15	0.2	0	0	0.075
84000	0	0	0.375	0	0.15	0.2	0	0	0.175
84400	0	0	0.45	0	0.1	0.1	0	0	0.175
84800	0	0	0.375	0	0.1	0.1	0	0	0.25
85200	0	0	0.3	0	0.1	0.175	0	0	0.25
85600	0	0	0.3	0	0	0.15	0	0	0.325
86000	0	0	0.375	0	0	0.15	0	0	0.325
86400	0	0	0.375	0	0	0.15	0	0	0.25
86800	0	0	0.45	0	0	0.15	0	0	0.25
87200	0	0.05	0.475	0	0	0.15	0	0	0.25
87600	0	0.05	0.475	0	0	0.225	0	0	0.25
88000	0	0.05	0.5	0	0	0.225	0	0	0.225
88400	0	0.05	0.425	0	0	0.3	0	0	0.225
88800	0	0.05	0.425	0	0	0.4	0	0	0.15
89200	0	0.05	0.5	0	0	0.325	0	0	0.225
89600	0	0.05	0.6	0	0	0.25	0	0	0.15
90000	0	0.05	0.6	0	0	0.25	0	0	0.15
90400	0	0.05	0.625	0	0	0.25	0	0	0.15
90800	0	0.05	0.65	0	0	0.25	0	0	0.15
91200	0	0	0.65	0	0	0.25	0	0	0.225
91600	0	0	0.725	0	0	0.25	0	0	0.225
92000	0	0	0.7	0	0	0.25	0	0	0.15
92400	0	0	0.8	0	0	0.175	0	0	0.15
92800	0	0	0.9	0	0	0.075	0	0	0.15
93200	0	0	0.925	0	0	0.15	0	0	0.15
93600	0	0	0.925	0	0	0.15	0	0	0.225
94000	0	0	0.95	0	0	0.15	0	0	0.225
94400	0	0	0.95	0	0	0.15	0	0	0.225
94800	0	0	0.95	0	0	0.15	0	0	0.225
95200	0	0	0.95	0	0	0.15	0	0	0.25
95600	0	0	0.975	0	0	0.075	0	0	0.35
96000	0	0	1	0	0	0.075	0	0	0.35
96400	0	0	1	0	0	0.075	0	0	0.35
96800	0	0	0.975	0	0	0.075	0	0	0.425
97200	0	0	0.975	0	0	0	0	0	0.35
97600	0	0	0.975	0	0	0	0	0	0.35
98000	0	0	0.975	0	0	0	0	0	0.425
98400	0	0	0.975	0	0	0.075	0	0	0.425
98800	0	0	0.975	0	0	0.15	0	0	0.425
99200	0	0	0.975	0	0	0.15	0	0	0.325
99600	0	0	0.975	0	0	0.15	0	0	0.225
100000	0	0	0.975	0	0	0.225	0	0	0.225
100400	0	0	0.975	0	0	0.225	0	0	0.225
100800	0	0	1	0	0	0.3	0	0	0.15
101200	0	0	1	0	0	0.3	0	0	0.15
101600	0	0	1	0	0	0.375	0	0	0.175
102000	0	0	1	0	0	0.475	0	0	0.1
102400	0	0	1	0	0	0.4	0	0	0.1
102800	0	0	1	0	0	0.325	0	0	0.1
103200	0	0	1	0	0	0.325	0	0	0.175
103600	0	0	1	0	0	0.325	0	0	0.175
104000	0	0	1	0	0	0.25	0	0	0.175
104400	0	0	1	0	0	0.25	0	0	0.275
104800	0	0	1	0	0	0.175	0	0	0.275
105200	0	0	1	0	0	0.175	0	0	0.35
105600	0	0	1	0	0	0.1	0	0	0.25
106000	0	0	1	0	0	0	0	0	0.25
106400	0	0	1	0	0	0	0	0	0.325
106800	0	0	1	0	0	0	0	0	0.325
107200	0	0	1	0	0	0	0	0	0.25
107600	0	0	1	0	0	0	0	0	0.35
108000	0	0	1	0	0	0	0	0	0.35
108400	0	0	1	0	0	0	0	0	0.325
108800	0	0	1	0	0	0.1	0	0	0.325
109200	0	0	1	0	0	0.1	0	0	0.35
109600	0	0.05	1	0	0	0.1	0	0	0.45
110000	0	0.05	1	0	0	0.1	0	0.05	0.55
110400	0	0.05	1	0	0	0.175	0	0.1	0.575
110800	0	0.05	1	0	0	0.25	0	0.1	0.675
111200	0	0.05	1	0	0	0.325	0	0.1	0.675
111600	0	0.05	1	0	0	0.325	0	0.1	0.575
112000	0	0.05	1	0	0	0.325	0	0.1	0.575
112400	0	0.05	1	0	0	0.325	0	0.1	0.575
112800	0	0.05	1	0	0	0.225	0	0.1	0.575
113200	0	0.05	1	0	0	0.325	0	0.15	0.575
113600	0	0	1	0	0	0.325	0	0.15	0.55
114000	0	0	1	0	0	0.325	0	0.1	0.45
114400	0	0	1	0	0	0.25	0	0.05	0.35
114800	0	0	1	0	0	0.25	0	0.1	0.35
115200	0	0	1	0	0	0.175	0	0.1	0.35
115600	0	0	1	0	0	0.175	0	0.1	0.35
116000	0	0	1	0	0	0.175	0	0.2	0.45
116400	0	0	1	0	0	0.175	0	0.25	0.475
116800	0	0.05	1	0	0	0.175	0	0.25	0.475
117200	0	0.05	1	0	0	0.075	0	0.2	0.45
117600	0	0.05	1	0	0	0.15	0	0.2	0.375
118000	0	0.05	1	0	0	0.225	0	0.2	0.475
118400	0	0.05	1	0	0	0.3	0	0.25	0.575
118800	0	0.1	1	0	0	0.225	0	0.25	0.575
119200	0	0.1	1	0	0	0.225	0	0.25	0.575
119600	0	0.1	1	0	0	0.225	0	0.25	0.575
120000	0	0.1	1	0	0	0.3	0	0.15	0.55
120400	0	0.15	1	0	0	0.375	0	0.1	0.525
120800	0	0.15	1	0	0.1	0.475	0	0.1	0.525
121200	0	0.15	1	0	0.1	0.55	0	0.1	0.45
121600	0	0.15	1	0	0.1	0.55	0	0.1	0.45
122000	0	0.15	1	0	0.1	0.475	0	0.1	0.35
122400	0	0.15	1	0	0.1	0.4	0	0.05	0.25
122800	0	0.1	1	0	0.1	0.475	0	0.05	0.25
123200	0	0.1	1	0	0.1	0.575	0	0.05	0.25
123600	0	0.1	1	0	0.1	0.575	0	0.05	0.25
124000	0	0.1	1	0	0.1	0.5	0	0.05	0.175
124400	0	0.05	1	0	0.1	0.5	0	0.05	0.1
124800	0	0	1	0	0	0.4	0	0.05	0.1
125200	0	0	1	0	0	0.425	0	0.05	0.1
125600	0	0	1	0	0	0.35	0	0.05	0.1
126000	0	0	1	0	0	0.35	0	0.05	0.1
126400	0	0	1	0	0	0.45	0	0.05	0.1
126800	0	0	1	0	0	0.375	0	0	0.1
127200	0	0	1	0	0	0.35	0	0	0.2
127600	0	0	1	0	0	0.35	0	0	0.2
128000	0	0	1	0	0	0.35	0	0	0.2
128400	0	0.05	1	0	0	0.275	0	0	0.2
128800	0	0.05	1	0	0	0.275	0	0	0.2
129200	0	0.05	1	0	0	0.175	0	0.05	0.3
129600	0	0.05	1	0	0	0.175	0	0.05	0.3
130000	0	0.05	1	0	0	0.175	0	0.05	0.3
130400	0	0.1	1	0	0	0.075	0	0.05	0.3
130800	0	0.1	1	0	0	0.15	0	0.05	0.2
131200	0	0.1	1	0	0	0.175	0	0.05	0.1
131600	0	0.1	1	0	0	0.175	0	0.05	0.1
132000	0	0.1	1	0	0	0.175	0	0.05	0.1
132400	0	0.05	1	0	0	0.175	0	0.05	0.1
132800	0	0.05	1	0	0.1	0.275	0	0.05	0.2
133200	0	0.05	1	0	0.1	0.275	0	0	0.1
133600	0	0.05	1	0	0.1	0.275	0	0	0.1
134000	0	0.1	1	0	0.1	0.275	0	0.05	0.2
134400	0	0.1	1	0	0.1	0.275	0	0.05	0.2
134800	0	0.15	1	0	0.1	0.2	0	0.05	0.3
135200	0	0.15	1	0	0.1	0.1	0	0.05	0.3
135600	0	0.15	1	0	0.1	0.1	0	0.05	0.3
136000	0	0.15	1	0	0.1	0.1	0	0.05	0.3
136400	0	0.2	1	0	0.1	0.1	0	0.05	0.3
136800	0	0.25	1	0	0	0	0	0.05	0.2
137200	0	0.25	1	0	0	0.1	0	0.05	0.2
137600	0	0.3	1	0	0	0.1	0	0.05	0.2
138000	0	0.25	1	0	0	0.1	0	0	0.1
138400	0	0.3	1	0	0	0.1	0	0	0.1
138800	0	0.3	1	0	0	0.1	0	0.05	0.1
139200	0	0.4	1	0	0	0.1	0	0.1	0.2
139600	0	0.45	1	0	0	0.1	0	0.1	0.2
140000	0	0.5	1	0	0	0.1	0	0.1	0.275
140400	0	0.55	1	0	0	0.1	0	0.1	0.275
140800	0	0.55	1	0	0	0.1	0	0.1	0.275
141200	0	0.6	1	0	0	0	0	0.1	0.375
141600	0	0.6	1	0	0	0.075	0	0.1	0.375
142000	0	0.65	1	0	0	0.075	0	0.1	0.45
142400	0	0.6	1	0	0	0.075	0	0.1	0.45
142800	0	0.6	1	0	0.1	0.175	0	0.05	0.35
143200	0	0.55	1	0	0.1	0.175	0	0	0.25
143600	0	0.55	1	0	0.1	0.175	0	0	0.35
144000	0	0.55	1	0	0.1	0.275	0	0	0.275
144400	0	0.5	1	0	0.1	0.35	0	0	0.275
144800	0	0.5	1	0	0.1	0.35	0	0	0.275
145200	0	0.5	1	0	0.1	0.35	0	0	0.175
145600	0	0.55	1	0	0.1	0.35	0	0	0.175
146000	0	0.6	1	0	0.1	0.35	0	0	0.2
146400	0	0.65	1	0	0.1	0.35	0	0	0.2
146800	0	0.7	1	0	0	0.325	0	0	0.3
147200	0	0.75	1	0	0	0.325	0	0	0.3
147600	0	0.8	1	0	0	0.325	0	0	0.2
148000	0	0.85	1	0	0	0.225	0	0	0.2
148400	0	0.9	1	0	0	0.15	0	0.1	0.3
148800	0	0.95	1	0	0	0.225	0	0.1	0.3
149200	0	1	1	0	0	0.225	0	0.1	0.3
149600	0	1	1	0	0	0.225	0	0.1	0.4
150000	0	1	1	0	0	0.3	0	0.1	0.4
150400	0	0.95	1	0	0	0.3	0	0.1	0.4
150800	0	0.95	1	0	0	0.225	0	0.1	0.3
151200	0	0.95	1	0	0	0.225	0	0.1	0.4
151600	0	0.95	1	0	0	0.3	0	0.1	0.5
152000	0	0.95	1	0	0	0.3	0	0.1	0.5
152400	0	0.95	1	0	0	0.375	0	0	0.4
152800	0	0.95	1	0	0	0.3	0	0	0.475
153200	0	0.95	1	0	0	0.4	0	0	0.475
153600	0	0.95	1	0	0	0.325	0	0	0.45
154000	0	0.95	1	0	0	0.25	0	0	0.35
154400	0	1	1	0	0	0.35	0	0.05	0.45
154800	0	1	1	0	0	0.35	0	0.05	0.45
155200	0	1	1	0	0	0.45	0	0.05	0.35
155600	0	0.95	1	0	0	0.375	0	0.05	0.325
156000	0	0.9	1	0	0	0.375	0	0.05	0.325
156400	0	0.85	1	0	0	0.3	0	0.05	0.325
156800	0	0.8	1	0	0	0.375	0	0.05	0.25
157200	0	0.75	1	0	0	0.275	0	0.05	0.25
157600	0	0.7	1	0	0	0.275	0	0.05	0.175
158000	0	0.65	1	0	0	0.375	0	0.05	0.25
158400	0	0.6	1	0	0	0.275	0	0	0.15
158800	0	0.55	1	0	0	0.375	0	0	0.15
159200	0	0.5	1	0	0	0.275	0	0	0.15
159600	0	0.5	1	0	0	0.275	0	0	0.15
160000	0	0.5	1	0	0	0.275	0	0	0.225
160400	0	0.5	1	0	0	0.275	0	0	0.225
160800	0	0.5	1	0	0	0.2	0	0	0.225
161200	0	0.5	1	0	0	0.275	0	0	0.225
161600	0	0.5	1	0	0	0.275	0	0	0.225
162000	0	0.5	1	0	0	0.25	0	0	0.15
162400	0	0.5	1	0	0	0.25	0	0	0.15
162800	0	0.5	1	0	0	0.15	0	0	0.225
163200	0	0.5	1	0	0	0.15	0	0	0.3
163600	0	0.5	1	0	0	0.15	0	0	0.225
164000	0	0.5	1	0	0	0.15	0	0	0.15
164400	0	0.5	1	0	0	0.15	0	0	0.25
164800	0	0.5	1	0	0	0.15	0	0	0.25
165200	0	0.5	1	0	0	0.075	0	0	0.35
165600	0	0.5	1	0	0	0.175	0	0	0.35
166000	0	0.5	1	0	0	0.175	0	0	0.35
166400	0	0.5	1	0	0	0.175	0	0	0.35
166800	0	0.5	1	0	0	0.175	0	0	0.275
167200	0	0.5	1	0	0	0.175	0	0	0.2
167600	0	0.5	1	0	0	0.175	0	0	0.2
168000	0	0.5	1	0	0	0.175	0	0	0.2
168400	0	0.5	1	0	0	0.175	0	0	0.2
168800	0	0.5	1	0	0.1	0.275	0	0	0.2
169200	0	0.5	1	0	0.1	0.275	0	0	0.1
169600	0	0.5	1	0	0.1	0.25	0	0	0.1
170000	0	0.5	1	0	0.1	0.175	0	0	0.1
170400	0	0.5	1	0	0.15	0.275	0	0	0.175
170800	0	0.55	1	0	0.15	0.275	0	0	0.175
171200	0	0.55	1	0	0.15	0.275	0	0	0.175
171600	0	0.55	1	0	0.15	0.35	0	0	0.25
172000	0	0.55	1	0	0.15	0.45	0	0	0.25
172400	0	0.6	1	0	0.15	0.45	0	0	0.15
172800	0	0.6	1	0	0.05	0.35	0	0	0.15
173200	0	0.6	1	0	0.05	0.45	0	0	0.15
173600	0	0.6	1	0	0.05	0.375	0	0	0.15
174000	0	0.6	1	0	0.05	0.375	0	0	0.15
174400	0	0.6	1	0	0	0.375	0	0	0.15
174800	0	0.55	1	0	0	0.375	0	0	0.225
175200	0	0.55	1	0	0	0.375	0	0	0.225
175600	0	0.55	1	0	0	0.3	0	0.05	0.25
176000	0	0.55	1	0	0	0.275	0	0.05	0.25
176400	0	0.5	1	0	0	0.275	0	0.05	0.25
176800	0	0.5	1	0	0	0.375	0	0.05	0.325
177200	0	0.5	1	0	0	0.275	0	0.05	0.325
177600	0	0.55	1	0	0	0.275	0	0.05	0.325
178000	0	0.55	1	0	0	0.275	0	0.05	0.4
178400	0	0.55	1	0	0	0.25	0	0.05	0.4
178800	0	0.6	1	0	0	0.325	0	0.15	0.425
179200	0	0.65	1	0	0	0.325	0	0.15	0.5
179600	0	0.7	1	0	0	0.325	0	0.1	0.4
180000	0	0.7	1	0	0	0.25	0	0.1	0.4
180400	0	0.7	1	0	0	0.25	0	0.1	0.4
180800	0	0.75	1	0	0	0.15	0	0.1	0.4
181200	0	0.75	1	0	0	0.15	0	0.1	0.4
181600	0	0.75	1	0	0	0.225	0	0.1	0.475
182000	0	0.8	1	0	0	0.225	0	0.1	0.5
182400	0	0.8	1	0	0	0.15	0	0.1	0.5
182800	0	0.8	1	0	0.1	0.175	0	0	0.4
183200	0	0.8	1	0	0.1	0.175	0	0	0.325
183600	0	0.8	1	0	0.1	0.175	0	0	0.425
184000	0	0.8	1	0	0.1	0.175	0	0	0.425
184400	0	0.85	1	0	0.1	0.175	0	0	0.5
184800	0	0.85	1	0	0.1	0.175	0	0	0.5
185200	0	0.9	1	0	0.1	0.25	0	0	0.5
185600	0	0.9	1	0	0.1	0.175	0	0	0.5
186000	0.025	0.9	1	0	0.1	0.175	0	0	0.4
186400	0.025	0.95	1	0	0.1	0.175	0	0	0.325
186800	0.025	0.95	1	0	0	0.075	0	0	0.4
187200	0.025	0.95	1	0	0	0.075	0	0	0.4
187600	0.025	0.95	1	0	0	0.075	0	0	0.375
188000	0.025	1	1	0	0	0.15	0	0	0.375
188400	0.025	1	1	0	0	0.15	0	0	0.3
188800	0.025	1	1	0	0	0.225	0	0	0.225
189200	0.025	1	1	0	0	0.15	0	0	0.225
189600	0.025	1	1	0	0	0.15	0	0	0.15
190000	0.025	1	1	0	0	0.15	0	0	0.15
190400	0.025	1	1	0	0	0.15	0	0.05	0.25
190800	0.025	1	1	0	0	0.15	0	0.05	0.175
191200	0.025	1	1	0	0	0.225	0	0.05	0.175
191600	0.025	1	1	0	0	0.225	0	0.05	0.1
192000	0.025	1	1	0	0	0.15	0	0.05	0.1
192400	0.025	1	1	0	0	0.15	0	0.05	0.1
192800	0.025	1	1	0	0	0.075	0	0.05	0.175
193200	0.05	1	1	0	0	0.175	0	0.05	0.175
193600	0.05	1	1	0	0	0.175	0	0.05	0.175
194000	0.05	1	1	0	0	0.275	0	0.05	0.25
194400	0.05	1	1	0	0	0.35	0	0	0.15
194800	0.075	1	1	0	0	0.35	0	0	0.25
195200	0.1	1	1	0	0	0.275	0	0	0.25
195600	0.125	1	1	0	0	0.275	0	0	0.25
196000	0.125	1	1	0	0	0.275	0	0	0.325
196400	0.125	1	1	0	0	0.275	0	0	0.325
196800	0.15	1	1	0	0	0.35	0	0	0.25
197200	0.125	1	1	0	0	0.25	0	0	0.325
197600	0.125	1	1	0	0	0.25	0	0	0.325
198000	0.125	1	1	0	0	0.15	0	0	0.25
198400	0.15	1	1	0	0	0.075	0	0	0.25
198800	0.15	1	1	0	0	0.075	0	0	0.15
199200	0.15	1	1	0	0	0.075	0	0	0.15
199600	0.15	1	1	0	0	0.15	0	0	0.15
200000	0.175	1	1	0	0	0.15	0	0	0.075
200400	0.2	1	1	0	0.05	0.25	0	0	0.075
200800	0.2	1	1	0	0.05	0.175	0	0	0.175
201200	0.225	1	1	0	0.05	0.25	0	0	0.175
201600	0.25	1	1	0	0.05	0.35	0	0	0.175
202000	0.25	1	1	0	0.05	0.425	0	0	0.175
202400	0.25	1	1	0	0.05	0.5	0	0	0.175
202800	0.25	1	1	0	0.05	0.575	0	0	0.175
203200	0.25	1	1	0	0.1	0.675	0	0	0.175
203600	0.25	1	1	0	0.1	0.6	0	0	0.175
204000	0.25	1	1	0	0.1	0.6	0	0	0.275
204400	0.25	1	1	0	0.05	0.575	0	0	0.375
204800	0.25	1	1	0	0.05	0.675	0	0	0.35
205200	0.25	1	1	0	0.05	0.6	0	0	0.275
205600	0.25	1	1	0	0.05	0.5	0	0	0.275
206000	0.25	1	1	0	0.05	0.425	0	0	0.375
206400	0.25	1	1	0	0.05	0.35	0	0	0.375
206800	0.25	1	1	0	0.05	0.275	0	0	0.375
207200	0.25	1	1	0	0	0.175	0	0	0.475
207600	0.25	1	1	0	0	0.275	0	0	0.475
208000	0.25	1	1	0	0	0.375	0	0	0.375
208400	0.25	1	1	0	0	0.3	0	0	0.275
208800	0.25	1	1	0	0	0.275	0	0	0.2
209200	0.25	1	1	0	0	0.275	0	0	0.2
209600	0.25	1	1	0	0	0.35	0	0	0.2
210000	0.25	1	1	0	0.05	0.45	0	0	0.175
210400	0.25	1	1	0	0.05	0.525	0	0	0.175
210800	0.25	1	1	0	0.05	0.625	0	0	0.25
211200	0.325	1	1	0	0.05	0.625	0	0	0.15
211600	0.325	1	1	0	0.05	0.525	0	0.05	0.25
212000	0.325	1	1	0	0.05	0.425	0	0.05	0.25
212400	0.325	1	1	0	0.05	0.425	0	0.05	0.25
212800	0.325	1	1	0	0.05	0.45	0	0.05	0.325
213200	0.325	1	1	0	0.05	0.45	0	0.05	0.325
213600	0.325	1	1	0	0.05	0.475	0	0.05	0.4
214000	0.325	1	1	0	0	0.375	0	0.05	0.325
214400	0.325	1	1	0	0	0.375	0	0.05	0.4
214800	0.325	1	1	0	0	0.35	0	0.05	0.325
215200	0.25	1	1	0	0	0.35	0	0.05	0.325
215600	0.25	1	1	0	0	0.425	0	0	0.225
216000	0.25	1	1	0	0	0.425	0	0	0.3
216400	0.25	1	1	0	0	0.425	0	0	0.3
216800	0.25	1	1	0	0	0.4	0	0	0.225
217200	0.25	1	1	0	0	0.4	0	0	0.225
217600	0.25	1	1	0	0	0.3	0	0	0.15
218000	0.25	1	1	0	0	0.3	0	0	0.15
218400	0.25	1	1	0	0	0.225	0	0	0.075
218800	0.25	1	1	0	0	0.15	0	0	0.175
219200	0.25	1	1	0	0	0.15	0	0	0.275
219600	0.25	1	1	0	0	0.075	0	0	0.275
220000	0.25	1	1	0	0	0.175	0	0	0.3
220400	0.25	1	1	0	0	0.275	0	0	0.375
220800	0.25	1	1	0	0	0.3	0	0	0.375
221200	0.25	1	1	0	0	0.3	0	0	0.375
221600	0.25	1	1	0	0	0.3	0	0	0.45
222000	0.25	1	1	0	0	0.375	0	0	0.45
222400	0.25	1	1	0	0	0.45	0	0	0.525
222800	0.25	1	1	0	0	0.45	0	0	0.425
223200	0.25	1	1	0	0	0.525	0	0	0.325
223600	0.25	1	1	0	0	0.525	0	0	0.325
224000	0.25	1	1	0	0.05	0.525	0	0.1	0.325
224400	0.25	1	1	0	0.05	0.425	0	0.1	0.35
224800	0.25	1	1	0	0.05	0.325	0	0.1	0.35
225200	0.25	1	1	0	0.05	0.325	0	0.1	0.35
225600	0.25	1	1	0	0.05	0.325	0	0.1	0.275
226000	0.25	1	1	0	0.05	0.25	0	0.1	0.275
226400	0.25	1	1	0	0.05	0.175	0	0.1	0.2
226800	0.25	1	1	0	0.05	0.25	0	0.1	0.2
227200	0.25	1	1	0	0.05	0.175	0	0.1	0.2
227600	0.25	1	1	0	0.05	0.175	0	0.1	0.275
228000	0.25	1	1	0	0	0.075	0	0	0.175
228400	0.25	1	1	0	0	0.075	0	0	0.15
228800	0.25	1	1	0	0	0.075	0	0	0.15
229200	0.25	1	1	0	0	0.075	0	0	0.225
229600	0.25	1	1	0	0	0.075	0	0	0.225
230000	0.25	1	1	0	0	0.175	0	0	0.225
230400	0.25	1	1	0	0	0.175	0	0	0.325
230800	0.25	1	1	0	0	0.1	0	0	0.325
231200	0.25	1	1	0	0	0.2	0	0	0.325
231600	0.25	1	1	0	0	0.2	0	0	0.325
232000	0.325	1	1	0	0	0.2	0	0.05	0.425
232400	0.325	1	1	0	0	0.2	0	0.05	0.35
232800	0.325	1	1	0	0	0.2	0	0.05	0.45
233200	0.325	1	1	0	0	0.3	0	0.05	0.45
233600	0.325	1	1	0	0	0.3	0	0.05	0.525
234000	0.325	1	1	0	0	0.2	0	0.05	0.525
234400	0.325	1	1	0	0	0.2	0	0.05	0.425
234800	0.325	1	1	0	0	0.2	0	0.05	0.5
235200	0.325	1	1	0	0	0.1	0	0.05	0.575
235600	0.325	1	1	0	0	0.1	0	0.05	0.5
236000	0.25	1	1	0	0	0.175	0	0	0.4
236400	0.25	1	1	0	0	0.175	0	0	0.475
236800	0.25	1	1	0	0	0.175	0	0	0.375
237200	0.25	1	1	0	0	0.075	0	0	0.3
237600	0.25	1	1	0	0	0.075	0	0	0.3
238000	0.25	1	1	0	0	0.15	0	0	0.3
238400	0.25	1	1	0	0	0.15	0	0	0.3
238800	0.25	1	1	0	0.05	0.25	0	0	0.325
239200	0.25	1	1	0	0.05	0.25	0	0	0.25
239600	0.25	1	1	0	0.05	0.25	0	0	0.25
240000	0.25	1	1	0	0.05	0.175	0	0	0.35
240400	0.25	1	1	0	0.05	0.175	0	0	0.275
240800	0.25	1	1	0	0.05	0.175	0	0	0.35
241200	0.25	1	1	0	0.05	0.175	0	0	0.35
241600	0.25	1	1	0	0.1	0.275	0	0	0.275
242000	0.25	1	1	0	0.1	0.275	0	0	0.275
242400	0.25	1	1	0	0.2	0.375	0	0	0.275
242800	0.25	1	1	0	0.15	0.275	0	0	0.25
243200	0.25	1	1	0	0.15	0.275	0	0	0.25
243600	0.25	1	1	0	0.15	0.275	0	0	0.35
244000	0.25	1	1	0	0.15	0.275	0	0	0.325
244400	0.25	1	1	0	0.15	0.275	0	0	0.325
244800	0.25	1	1	0	0.15	0.275	0	0	0.25
245200	0.25	1	1	0	0.15	0.375	0	0	0.25
245600	0.25	1	1	0	0.1	0.35	0	0	0.325
246000	0.25	1	1	0	0.1	0.275	0	0	0.4
246400	0.25	1	1	0	0	0.25	0	0	0.4
246800	0.25	1	1	0	0	0.25	0	0	0.4
247200	0.25	1	1	0	0	0.25	0	0	0.4
247600	0.25	1	1	0	0	0.25	0	0	0.3
248000	0.25	1	1	0	0	0.325	0	0	0.325
248400	0.25	1	1	0	0	0.425	0	0	0.425
248800	0.25	1	1	0	0	0.5	0	0	0.425
249200	0.25	1	1	0	0	0.475	0	0	0.525
249600	0.25	1	1	0	0	0.4	0	0	0.45
250000	0.25	1	1	0	0	0.4	0	0	0.375
250400	0.25	1	1	0	0	0.325	0	0	0.375
250800	0.25	1	1	0	0	0.325	0	0	0.3
251200	0.25	1	1	0	0	0.4	0	0	0.4
251600	0.25	1	1	0	0	0.475	0	0	0.4
252000	0.25	1	1	0	0	0.4	0	0	0.375
252400	0.25	1	1	0	0	0.375	0	0	0.275
252800	0.25	1	1	0	0	0.3	0	0	0.35
253200	0.25	1	1	0	0	0.225	0	0	0.25
253600	0.25	1	1	0	0	0.225	0	0	0.25
254000	0.25	1	1	0	0	0.325	0	0	0.25
254400	0.25	1	1	0	0	0.325	0	0	0.25
254800	0.25	1	1	0	0	0.4	0	0	0.325
255200	0.25	1	1	0	0	0.4	0	0	0.3
255600	0.25	1	1	0	0	0.4	0	0	0.3
256000	0.25	1	1	0	0	0.475	0	0	0.225
256400	0.25	1	1	0	0	0.475	0	0	0.325
256800	0.25	1	1	0	0	0.475	0	0	0.35
257200	0.25	1	1	0	0	0.475	0	0	0.35
257600	0.25	1	1	0	0	0.575	0	0	0.45
258000	0.25	1	1	0	0	0.475	0	0	0.525
258400	0.25	1	1	0	0	0.475	0	0	0.525
258800	0.25	1	1	0	0	0.4	0	0	0.45
259200	0.25	1	1	0	0	0.325	0	0	0.45
259600	0.25	1	1	0	0	0.25	0	0	0.55
260000	0.325	1	1	0	0	0.175	0	0.05	0.65
260400	0.325	1	1	0	0	0.1	0	0.05	0.55
260800	0.325	1	1	0	0	0.1	0	0.05	0.525
261200	0.325	1	1	0	0	0.1	0	0.05	0.525
261600	0.325	1	1	0	0	0	0	0.05	0.425
262000	0.325	1	1	0	0	0	0	0.05	0.425
262400	0.325	1	1	0	0	0	0	0.05	0.425
262800	0.325	1	1	0	0	0	0	0.05	0.5
263200	0.325	1	1	0	0	0.075	0	0.05	0.5
263600	0.325	1	1	0	0	0.075	0	0.05	0.4
264000	0.25	1	1	0	0	0.075	0	0	0.375
264400	0.25	1	1	0	0	0.15	0	0	0.375
264800	0.25	1	1	0	0	0.15	0	0	0.3
265200	0.25	1	1	0	0	0.15	0	0	0.3
265600	0.25	1	1	0	0	0.15	0	0	0.3
266000	0.25	1	1	0	0	0.15	0	0	0.225
266400	0.25	1	1	0	0	0.225	0	0	0.225
266800	0.25	1	1	0	0	0.225	0	0	0.25
267200	0.25	1	1	0	0	0.15	0	0.05	0.275
267600	0.25	1	1	0	0	0.15	0	0.05	0.275
268000	0.25	1	1	0	0	0.15	0	0.05	0.2
268400	0.25	1	1	0	0	0.175	0	0.05	0.2
268800	0.25	1	1	0	0	0.175	0	0.05	0.275
269200	0.25	1	1	0	0	0.25	0	0.05	0.275
269600	0.325	1	1	0	0	0.25	0	0.05	0.275
270000	0.325	1	1	0	0	0.25	0	0.05	0.275
270400	0.325	1	1	0	0	0.175	0	0.05	0.275
270800	0.4	1	1	0	0	0.175	0	0.05	0.275
271200	0.4	1	1	0	0	0.175	0	0	0.175
271600	0.4	1	1	0	0	0.175	0	0	0.25
272000	0.475	1	1	0	0.1	0.275	0	0	0.325
272400	0.55	1	1	0	0.1	0.175	0	0	0.325
272800	0.625	1	1	0	0.1	0.175	0	0	0.25
273200	0.7	1	1	0	0.1	0.1	0	0	0.25
273600	0.625	1	1	0	0.1	0.2	0	0	0.25
274000	0.625	1	1	0	0.1	0.2	0	0	0.25
274400	0.7	1	1	0	0.1	0.2	0	0	0.25
274800	0.7	1	1	0	0.1	0.2	0	0	0.15
275200	0.775	1	1	0	0.1	0.2	0	0	0.15
275600	0.85	1	1	0	0.1	0.2	0	0	0.15
276000	0.85	1	1	0	0	0.1	0	0	0.15
276400	0.85	1	1	0	0	0.175	0	0	0.15
276800	0.85	1	1	0	0	0.175	0	0	0.25
277200	0.85	1	1	0	0	0.175	0	0	0.35
277600	0.925	1	1	0	0	0.15	0.1	0.1	0.45
278000	1	1	1	0	0	0.15	0.1	0.1	0.525
278400	1	1	1	0	0	0.15	0.1	0.1	0.6
278800	1	1	1	0	0	0.15	0.1	0.1	0.675
279200	1	1	1	0	0	0.15	0.1	0.1	0.775
279600	1	1	1	0	0	0.225	0.1	0.1	0.7
280000	1	1	1	0	0	0.225	0.1	0.1	0.725
280400	1	1	1	0	0	0.15	0.1	0.1	0.725
280800	1	1	1	0	0	0.15	0.1	0.1	0.625
281200	1	1	1	0	0	0.25	0.1	0.1	0.525
281600	1	1	1	0	0	0.175	0	0	0.425
282000	1	1	1	0	0	0.25	0	0	0.35
282400	1	1	1	0	0	0.35	0	0	0.275
282800	1	1	1	0	0	0.425	0	0	0.2
283200	1	1	1	0	0	0.525	0	0	0.175
283600	1	1	1	0	0	0.45	0	0	0.175
284000	1	1	1	0	0	0.45	0	0	0.175
284400	1	1	1	0	0.05	0.55	0	0	0.175
284800	1	1	1	0	0.05	0.55	0	0	0.175
285200	1	1	1	0	0.05	0.45	0	0.05	0.275
285600	1	1	1	0	0.05	0.45	0	0.05	0.275
286000	1	1	1	0	0.05	0.45	0	0.05	0.275
286400	1	1	1	0	0.05	0.35	0	0.05	0.275
286800	1	1	1	0	0.05	0.275	0	0.05	0.275
287200	1	1	1	0	0.05	0.175	0	0.05	0.2
287600	1	1	1	0	0.05	0.175	0	0.05	0.2
288000	1	1	1	0	0.05	0.25	0	0.05	0.1
288400	1	1	1	0	0	0.15	0	0.05	0.1
288800	1	1	1	0	0	0.15	0	0.05	0.175
289200	1	1	1	0	0	0.15	0	0	0.075
289600	1	1	1	0	0	0.225	0	0	0.075
290000	1	1	1	0	0	0.15	0	0	0.075
290400	1	1	1	0	0	0.15	0	0	0.15
290800	1	1	1	0	0.1	0.25	0	0	0.15
291200	1	1	1	0	0.1	0.25	0	0	0.15
291600	1	1	1	0	0.1	0.325	0	0	0.15
292000	1	1	1	0	0.1	0.25	0	0	0.225
292400	1	1	1	0	0.1	0.25	0	0	0.225
292800	1	1	1	0	0.1	0.25	0	0	0.225
293200	1	1	1	0	0.1	0.25	0	0	0.225
293600	1	1	1	0	0.1	0.275	0	0	0.3
294000	1	1	1	0	0.1	0.275	0	0	0.3
294400	1	1	1	0	0.1	0.275	0	0	0.225
294800	1	1	1	0	0	0.175	0	0	0.225
295200	1	1	1	0	0.05	0.275	0	0	0.225
295600	1	1	1	0	0.05	0.2	0	0	0.325
296000	1	1	1	0	0.05	0.2	0	0	0.25
296400	1	1	1	0	0.05	0.2	0	0	0.25
296800	1	1	1	0	0.05	0.275	0	0	0.175
297200	1	1	1	0	0.05	0.275	0	0	0.175
297600	1	1	1	0	0.05	0.175	0	0	0.2
298000	1	1	1	0	0.05	0.25	0	0	0.2
298400	1	1	1	0	0.05	0.25	0	0	0.3
298800	1	1	1	0	0.05	0.25	0	0	0.4
299200	1	1	1	0	0	0.225	0	0	0.4
299600	1	1	1	0	0	0.225	0	0	0.3
300000	1	1	1	0	0	0.225	0	0	0.3
300400	1	1	1	0	0	0.3	0	0	0.3
300800	1	1	1	0	0	0.225	0	0	0.3
301200	1	1	1	0	0	0.3	0	0	0.4
301600	1	1	1	0	0	0.3	0	0	0.3
302000	1	1	1	0	0	0.225	0	0	0.3
302400	1	1	1	0	0	0.225	0	0	0.2
302800	1	1	1	0	0	0.225	0	0	0.1
303200	1	1	1	0	0	0.25	0	0	0.2
303600	1	1	1	0	0	0.25	0	0	0.2
304000	1	1	1	0	0	0.25	0	0	0.2
304400	1	1	1	0	0	0.275	0	0	0.2
304800	1	1	1	0	0	0.275	0	0	0.275
305200	1	1	1	0	0	0.2	0	0	0.175
305600	1	1	1	0	0	0.2	0	0	0.175
306000	1	1	1	0	0	0.2	0	0	0.25
306400	1	1	1	0	0	0.275	0	0	0.325
306800	1	1	1	0	0	0.35	0	0	0.325
307200	1	1	1	0	0	0.25	0	0	0.325
307600	1	1	1	0	0	0.25	0	0	0.325
308000	1	1	1	0	0	0.25	0	0	0.425
308400	1	1	1	0	0	0.15	0	0	0.425
308800	1	1	1	0	0	0.15	0	0	0.35
309200	1	1	1	0	0	0.225	0	0	0.35
309600	1	1	1	0	0	0.225	0	0	0.425
310000	1	1	1	0	0	0.3	0	0	0.35
310400	1	1	1	0	0	0.325	0	0	0.35
310800	1	1	1	0	0	0.325	0	0	0.425
311200	1	1	1	0	0	0.4	0.025	0.1	0.425
311600	1	1	1	0	0	0.4	0.025	0.1	0.425
312000	1	1	1	0	0	0.475	0.025	0.1	0.4
312400	1	1	1	0	0	0.55	0.025	0.1	0.5
312800	1	1	1	0	0.05	0.65	0.025	0.1	0.575
313200	1	1	1	0	0.05	0.575	0.025	0.1	0.575
313600	1	1	1	0	0.05	0.575	0.025	0.1	0.575
314000	1	1	1	0	0.05	0.5	0.025	0.1	0.575
314400	1	1	1	0	0.05	0.4	0.025	0.1	0.575
314800	1	1	1	0	0.05	0.325	0.025	0.1	0.5
315200	1	1	1	0	0.05	0.35	0	0	0.4
315600	1	1	1	0	0.05	0.35	0	0	0.4
316000	1	1	1	0	0.05	0.275	0	0	0.425
316400	1	1	1	0	0.05	0.2	0	0	0.325
316800	1	1	1	0	0	0.1	0	0	0.325
317200	1	1	1	0	0	0.1	0	0	0.325
317600	1	1	1	0	0	0.1	0	0	0.25
318000	1	1	1	0	0	0.1	0	0	0.25
318400	1	1	1	0	0	0.1	0	0	0.175
318800	1	1	1	0	0	0.175	0	0	0.175
319200	1	1	1	0	0	0.15	0	0	0.175
319600	1	1	1	0	0	0.15	0	0	0.275
320000	1	1	1	0	0	0.15	0	0	0.25
320400	1	1	1	0	0	0.225	0	0	0.25
320800	1	1	1	0	0	0.225	0	0	0.25
321200	1	1	1	0	0	0.225	0	0	0.25
321600	1	1	1	0	0	0.225	0	0.05	0.35
322000	1	1	1	0	0	0.225	0	0.05	0.35
322400	1	1	1	0	0	0.3	0	0.05	0.35
322800	1	1	1	0	0	0.225	0	0.1	0.45
323200	1	1	1	0	0	0.225	0	0.1	0.45
323600	1	1	1	0	0	0.225	0	0.1	0.35
324000	1	1	1	0	0	0.325	0	0.1	0.375
324400	1	1	1	0	0	0.25	0	0.1	0.475
324800	1	1	1	0	0	0.25	0	0.1	0.4
325200	1	1	1	0	0.1	0.35	0	0.1	0.4
325600	1	1	1	0	0.1	0.35	0	0.05	0.3
326000	1	1	1	0	0.1	0.35	0	0.05	0.3
326400	1	1	1	0	0.1	0.275	0	0.05	0.3
326800	1	1	1	0	0.1	0.275	0	0	0.275
327200	1	1	1	0	0.1	0.2	0	0	0.35
327600	1	1	1	0	0.1	0.2	0	0	0.35
328000	1	1	1	0	0.1	0.1	0	0	0.25
328400	1	1	1	0	0.1	0.1	0	0	0.15
328800	1	1	1	0	0.1	0.1	0	0	0.25
329200	1	1	1	0	0	0	0	0	0.25
329600	1	1	1	0	0	0.075	0	0	0.25
330000	1	1	1	0	0	0.075	0	0	0.325
330400	1	1	1	0	0	0.075	0	0	0.325
330800	1	1	1	0	0	0.15	0	0	0.325
331200	1	1	1	0	0	0.15	0	0	0.325
331600	1	1	1	0	0	0.15	0	0	0.425
332000	1	1	1	0	0	0.225	0	0	0.425
332400	1	1	1	0	0	0.225	0	0	0.525
332800	1	1	1	0	0	0.3	0	0	0.5
333200	1	1	1	0	0.1	0.4	0	0	0.6
333600	1	1	1	0	0.1	0.325	0	0	0.675
334000	1	1	1	0	0.1	0.325	0	0	0.7
334400	1	1	1	0	0.1	0.325	0	0	0.8
334800	1	1	1	0	0.1	0.35	0	0	0.8
335200	1	1	1	0	0.1	0.35	0	0	0.825
335600	1	1	1	0	0.1	0.425	0	0	0.8
336000	1	1	1	0	0.1	0.35	0	0	0.875
336400	1	1	1	0	0.1	0.45	0	0	0.85
336800	1	1	1	0	0.1	0.375	0	0	0.775
337200	1	1	1	0	0	0.35	0	0	0.675
337600	1	1	1	0	0	0.35	0	0	0.675
338000	1	1	1	0	0	0.35	0	0	0.575
338400	1	1	1	0	0	0.425	0	0	0.475
338800	1	1	1	0	0	0.325	0	0	0.4
339200	1	1	1	0	0	0.325	0	0	0.4
339600	1	1	1	0	0	0.25	0	0	0.325
340000	1	1	1	0	0	0.25	0	0	0.25
340400	1	1	1	0	0	0.225	0	0	0.25
340800	1	1	1	0	0	0.225	0	0	0.25
341200	1	1	1	0	0	0.15	0	0	0.325
341600	1	1	1	0	0	0.15	0	0	0.25
342000	1	1	1	0	0	0.25	0	0	0.325
342400	1	1	1	0	0	0.175	0	0.05	0.425
342800	1	1	1	0	0	0.25	0	0.05	0.525
343200	1	1	1	0	0	0.25	0	0.05	0.5
343600	1	1	1	0	0	0.25	0	0.05	0.575
344000	1	1	1	0	0	0.25	0	0.05	0.675
344400	1	1	1	0	0	0.175	0	0.05	0.6
344800	1	1	1	0	0	0.175	0	0.05	0.6
345200	1	1	1	0	0	0.175	0	0.05	0.625
345600	1	1	1	0	0	0.275	0	0.05	0.625
346000	1	1	1	0	0	0.25	0	0.05	0.55
346400	1	1	1	0	0	0.35	0	0	0.525
346800	1	1	1	0	0	0.275	0	0	0.425
347200	1	1	1	0	0	0.275	0	0	0.425
347600	1	1	1	0	0	0.35	0	0	0.35
348000	1	1	1	0	0	0.35	0	0	0.25
348400	1	1	1	0	0	0.425	0	0	0.325
348800	1	1	1	0	0	0.5	0	0	0.325
349200	1	1	1	0	0	0.5	0	0.05	0.325
349600	1	1	1	0	0	0.4	0	0.05	0.325
350000	1	1	1	0	0	0.325	0	0.05	0.325
350400	1	1	1	0	0	0.3	0	0.05	0.25
350800	1	1	1	0	0	0.375	0	0.05	0.25
351200	1	1	1	0	0	0.375	0	0.05	0.25
351600	1	1	1	0	0	0.4	0	0.05	0.25
352000	1	1	1	0	0	0.475	0	0.05	0.25
352400	1	1	1	0	0	0.5	0	0.05	0.25
352800	1	1	1	0	0	0.425	0	0.05	0.25
353200	1	1	1	0	0	0.5	0	0	0.225
353600	1	1	1	0	0	0.5	0	0	0.225
354000	1	1	1	0	0	0.5	0	0	0.325
354400	1	1	1	0	0	0.425	0	0.05	0.425
354800	1	1	1	0	0	0.35	0	0.05	0.425
355200	1	1	1	0	0	0.35	0	0.05	0.45
355600	1	1	1	0	0	0.25	0	0.05	0.45
356000	1	1	1	0	0	0.175	0	0.05	0.45
356400	1	1	1	0	0	0.075	0	0.05	0.45
356800	1	1	1	0	0	0.075	0	0.05	0.525
357200	1	1	1	0	0	0	0	0.1	0.55
357600	1	1	1	0	0	0	0	0.1	0.65
358000	1	1	1	0	0	0	0	0.1	0.55
358400	1	1	1	0	0	0	0	0.1	0.55
358800	1	1	1	0	0	0.075	0	0.1	0.55
359200	1	1	1	0	0	0.175	0	0.15	0.55
359600	1	1	1	0	0	0.175	0	0.15	0.55
360000	1	1	1	0	0	0.25	0	0.15	0.55
360400	1	1	1	0	0	0.25	0	0.15	0.475
360800	1	1	1	0	0	0.25	0	0.15	0.4
361200	1	1	1	0	0	0.25	0	0.1	0.375
361600	1	1	1	0	0	0.25	0	0.1	0.35
362000	1	1	1	0	0	0.25	0	0.1	0.425
362400	1	1	1	0	0.1	0.35	0	0.05	0.425
362800	1	1	1	0	0.1	0.275	0	0.05	0.425
363200	1	1	1	0	0.1	0.175	0	0	0.4
363600	1	1	1	0	0.1	0.175	0	0	0.4
364000	1	1	1	0	0.1	0.1	0	0	0.475
364400	1	1	1	0	0.1	0.175	0	0	0.55
364800	1	1	1	0	0.1	0.25	0	0	0.65
365200	1	1	1	0	0.1	0.25	0	0	0.65
365600	1	1	1	0	0.1	0.25	0	0	0.65
366000	1	1	1	0	0.1	0.35	0	0	0.65
366400	1	1	1	0	0	0.325	0	0.05	0.65
366800	1	1	1	0	0	0.4	0	0.05	0.65
367200	1	1	1	0	0	0.475	0	0.1	0.675
367600	1	1	1	0	0	0.475	0	0.1	0.675
368000	1	1	1	0	0	0.55	0	0.15	0.7
368400	1	1	1	0	0	0.55	0	0.15	0.625
368800	1	1	1	0	0	0.55	0	0.15	0.625
369200	1	1	1	0	0	0.65	0	0.15	0.55
369600	1	1	1	0	0	0.65	0	0.15	0.475
370000	1	1	1	0	0	0.625	0	0.15	0.5
370400	1	1	1	0	0	0.55	0	0.1	0.4
370800	1	1	1	0	0	0.475	0	0.1	0.4
371200	1	1	1	0	0	0.475	0	0.05	0.3
371600	1	1	1	0	0	0.55	0	0.05	0.3
372000	1	1	1	0	0	0.475	0	0	0.2
372400	1	1	1	0	0	0.5	0	0	0.2
372800	1	1	1	0	0	0.5	0	0	0.1
373200	1	1	1	0	0	0.4	0	0	0.1
373600	1	1	1	0	0	0.4	0	0	0.2
374000	1	1	1	0	0	0.4	0	0	0.175
374400	1	1	1	0	0	0.4	0	0	0.175
374800	1	1	1	0	0	0.5	0	0	0.175
375200	1	1	1	0	0	0.425	0	0	0.25
375600	1	1	1	0	0	0.425	0	0	0.35
376000	1	1	1	0	0	0.425	0	0	0.35
376400	1	1	1	0	0	0.425	0	0	0.35
376800	1	1	1	0	0	0.35	0	0.05	0.45
377200	1	1	1	0	0	0.35	0	0.05	0.45
377600	1	1	1	0	0	0.35	0	0.05	0.45
378000	1	1	1	0	0	0.275	0	0.05	0.475
378400	1	1	1	0	0	0.275	0	0.05	0.475
378800	1	1	1	0	0	0.175	0	0.05	0.475
379200	1	1	1	0	0	0.25	0	0.05	0.475
379600	1	1	1	0	0	0.25	0	0.05	0.45
380000	1	1	1	0	0	0.325	0	0.05	0.45
380400	1	1	1	0	0	0.225	0	0.05	0.45
380800	1	1	1	0	0	0.225	0	0	0.35
381200	1	1	1	0	0	0.3	0	0	0.35
381600	1	1	1	0	0	0.3	0	0	0.325
382000	1	1	1	0	0	0.375	0	0	0.225
382400	1	1	1	0	0	0.45	0	0	0.3
382800	1	1	1	0	0	0.45	0	0	0.4
383200	1	1	1	0	0	0.45	0	0	0.4
383600	1	1	1	0	0	0.375	0	0	0.4
384000	1	1	1	0	0	0.3	0	0	0.4
384400	1	1	1	0	0	0.3	0	0	0.4
384800	1	1	1	0	0	0.3	0	0	0.475
385200	1	1	1	0	0	0.225	0	0	0.55
385600	1	1	1	0	0	0.3	0	0	0.55
386000	1	1	1	0	0	0.225	0	0	0.625
386400	1	1	1	0	0	0.15	0	0	0.625
386800	1	1	1	0	0	0.15	0	0	0.625
387200	1	1	1	0	0	0.075	0	0	0.65
387600	1	1	1	0	0	0.075	0	0	0.575
388000	1	1	1	0	0	0.075	0	0	0.65
388400	1	1	1	0	0	0.15	0	0	0.725
388800	1	1	1	0	0	0.225	0	0	0.65
389200	1	1	1	0	0	0.3	0	0	0.575
389600	1	1	1	0	0	0.3	0	0	0.6
390000	1	1	1	0	0	0.3	0	0.05	0.625
390400	1	1	1	0	0	0.3	0	0.05	0.625
390800	1	1	1	0	0	0.4	0	0.05	0.525
391200	1	1	1	0	0	0.475	0	0.05	0.425
391600	1	1	1	0	0	0.475	0	0.05	0.425
392000	1	1	1	0	0	0.575	0	0.05	0.425
392400	1	1	1	0	0	0.5	0	0.05	0.45
392800	1	1	1	0	0	0.425	0	0.05	0.45
393200	1	1	1	0	0	0.35	0	0.05	0.45
393600	1	1	1	0	0	0.275	0	0.05	0.35
394000	1	1	1	0	0	0.375	0	0	0.35
394400	1	1	1	0	0	0.375	0	0	0.35
394800	1	1	1	0	0	0.275	0	0	0.35
395200	1	1	1	0	0	0.275	0	0	0.35
395600	1	1	1	0	0	0.35	0	0	0.45
396000	1	1	1	0	0	0.25	0	0	0.375
396400	1	1	1	0	0	0.325	0	0	0.275
396800	1	1	1	0	0	0.425	0	0	0.275
397200	1	1	1	0	0	0.425	0	0	0.275
397600	1	1	1	0	0	0.5	0	0	0.275
398000	1	1	1	0	0	0.4	0	0	0.25
398400	1	1	1	0	0	0.4	0	0	0.275
398800	1	1	1	0	0	0.4	0	0	0.275
399200	1	1	1	0	0	0.325	0	0	0.35
399600	1	1	1	0	0	0.325	0	0	0.35
400000	1	1	1	0	0	0.325	0	0	0.35

## Sheet: all
0	0	0	0	0	0	0	0	0	0
400	0	0	0	0	0	0.25	0	0	0
800	0	0	0	0	0	0.46875	0	0	0
1200	0	0	0	0	0	0.3125	0	0	0
1600	0	0	0	0	0.03125	0.296875	0	0	0
2000	0	0	0	0	0.075	0.325	0	0	0
2400	0	0	0	0	0.104167	0.354167	0	0	0
2800	0	0	0	0	0.0892857	0.330357	0	0	0
3200	0	0	0	0	0.078125	0.34375	0	0	0
3600	0	0	0	0.00694444	0.111111	0.402778	0	0	0
4000	0	0	0	0.00625	0.1	0.4	0	0	0
4400	0	0	0	0.00625	0.1	0.4125	0	0	0
4800	0	0	0	0.00625	0.1	0.40625	0	0	0
5200	0	0	0	0.00625	0.125	0.43125	0	0	0
5600	0	0	0	0.03125	0.1375	0.45	0	0	0
6000	0	0	0	0.03125	0.125	0.45	0	0	0
6400	0	0	0	0.03125	0.1	0.425	0	0	0
6800	0	0	0	0.03125	0.1	0.48125	0	0	0
7200	0	0	0	0.03125	0.125	0.50625	0	0	0
7600	0	0	0	0.025	0.0875	0.41875	0	0	0
8000	0	0	0	0.025	0.1	0.425	0	0	0
8400	0	0	0	0.025	0.1	0.45625	0	0	0
8800	0	0	0	0.025	0.1	0.4625	0	0	0
9200	0	0	0	0.025	0.075	0.48125	0	0	0.04375
9600	0	0	0	0	0.0625	0.48125	0	0	0.04375
10000	0	0	0	0	0.05	0.45625	0	0	0.06875
10400	0	0	0	0	0.0625	0.5	0	0	0.09375
10800	0	0	0	0	0.0625	0.45	0	0	0.11875
11200	0	0	0	0	0.05	0.45	0	0	0.1375
11600	0	0	0	0	0.05	0.4875	0	0	0.18125
12000	0	0	0	0	0.0375	0.4875	0	0	0.2
12400	0	0	0	0	0.0625	0.4875	0	0.0125	0.225
12800	0	0	0	0	0.0625	0.48125	0	0.0125	0.225
13200	0	0	0	0	0.0625	0.45625	0	0.0375	0.20625
13600	0	0	0	0.00625	0.075	0.4375	0	0.05	0.23125
14000	0	0	0	0.00625	0.075	0.475	0	0.05	0.20625
14400	0	0	0	0.00625	0.0625	0.44375	0	0.0625	0.20625
14800	0	0	0	0.00625	0.0625	0.48125	0	0.0625	0.20625
15200	0	0	0	0.00625	0.05	0.45625	0	0.0625	0.25625
15600	0	0	0	0.00625	0.0625	0.44375	0	0.0875	0.2625
16000	0	0	0	0.00625	0.0625	0.425	0	0.0875	0.24375
16400	0	0	0	0.00625	0.0375	0.41875	0	0.075	0.24375
16800	0	0	0	0.00625	0.0375	0.4	0	0.0875	0.29375
17200	0	0	0	0.00625	0.0375	0.4625	0	0.0625	0.2875
17600	0	0	0	0	0.0125	0.48125	0	0.05	0.28125
18000	0	0	0	0	0.0375	0.5	0	0.05	0.325
18400	0	0	0	0	0.0375	0.525	0	0.0375	0.325
18800	0	0	0	0	0.0375	0.50625	0	0.0375	0.36875
19200	0	0	0	0	0.05	0.4875	0	0.0375	0.325
19600	0	0	0	0	0.05	0.50625	0	0.0125	0.29375
20000	0	0	0	0	0.0625	0.53125	0	0.025	0.34375
20400	0	0	0	0	0.0625	0.46875	0	0.0375	0.34375
20800	0	0	0	0	0.0875	0.5	0	0.025	0.31875
21200	0	0	0	0.025	0.125	0.46875	0	0.0375	0.325
21600	0	0	0	0.025	0.1375	0.5	0	0.0625	0.375
22000	0	0	0	0.025	0.1375	0.49375	0	0.0875	0.375
22400	0	0	0	0.025	0.1375	0.475	0.00625	0.1125	0.39375
22800	0	0	0	0.025	0.1375	0.46875	0.0125	0.1375	0.39375
23200	0	0	0	0.025	0.125	0.48125	0.0125	0.15	0.4375
23600	0	0	0	0.025	0.125	0.48125	0.0125	0.1625	0.4625
24000	0	0	0	0.025	0.125	0.45625	0.0125	0.175	0.4625
24400	0	0	0	0.025	0.1375	0.50625	0.0125	0.1625	0.45625
24800	0	0	0	0.025	0.1125	0.43125	0.0125	0.175	0.45625
25200	0	0	0	0	0.0875	0.45	0.0125	0.1875	0.5
25600	0	0	0	0	0.0875	0.4375	0.0125	0.1625	0.48125
26000	0	0	0	0	0.075	0.4125	0.0125	0.15	0.4875
26400	0	0	0	0	0.075	0.39375	0.00625	0.15	0.50625
26800	0	0	0.01875	0	0.075	0.38125	0	0.15	0.48125
27200	0	0	0.01875	0	0.0875	0.39375	0.025	0.1625	0.5
27600	0	0	0.0375	0	0.0875	0.4125	0.05	0.175	0.50625
28000	0	0.0125	0.0625	0	0.1	0.4375	0.05	0.15	0.5
28400	0	0.0125	0.08125	0	0.1125	0.4625	0.05	0.1875	0.55625
28800	0	0.0125	0.08125	0	0.1125	0.50625	0.05	0.225	0.6
29200	0	0.025	0.10625	0	0.1	0.475	0.05625	0.2375	0.60625
29600	0	0.025	0.125	0.00625	0.1125	0.45625	0.08125	0.2625	0.58125
30000	0	0.025	0.15	0.00625	0.1125	0.4875	0.10625	0.2875	0.60625
30400	0	0.025	0.15	0.03125	0.15	0.55625	0.10625	0.275	0.61875
30800	0	0.025	0.13125	0.03125	0.1625	0.59375	0.10625	0.25	0.61875
31200	0	0.025	0.13125	0.03125	0.1625	0.5875	0.08125	0.25	0.60625
31600	0	0.025	0.1375	0.03125	0.175	0.575	0.0625	0.275	0.63125
32000	0	0.0125	0.1375	0.03125	0.1875	0.59375	0.0625	0.3	0.6375
32400	0	0.0125	0.14375	0.03125	0.1625	0.575	0.0625	0.2625	0.60625
32800	0	0.0125	0.16875	0.03125	0.175	0.59375	0.0625	0.225	0.58125
33200	0	0.0125	0.16875	0.03125	0.175	0.575	0.0625	0.2125	0.55
33600	0	0.025	0.175	0.025	0.1625	0.575	0.0625	0.2125	0.59375
34000	0	0.025	0.175	0.025	0.175	0.55	0.0375	0.1875	0.5625
34400	0	0.0375	0.2	0.025	0.1625	0.525	0.0375	0.2	0.5625
34800	0	0.0625	0.225	0.025	0.175	0.4875	0.0375	0.225	0.5625
35200	0	0.075	0.25	0.025	0.1875	0.49375	0.0625	0.225	0.5125
35600	0	0.075	0.25	0.025	0.1625	0.5125	0.0625	0.2	0.4875
36000	0	0.0875	0.25	0.025	0.125	0.51875	0.0625	0.1875	0.525
36400	0	0.1125	0.25	0.025	0.15	0.5125	0.0625	0.1875	0.55
36800	0.025	0.1375	0.26875	0.025	0.1375	0.50625	0.0625	0.1875	0.53125
37200	0.03125	0.15	0.26875	0.025	0.15	0.53125	0.05625	0.1875	0.55
37600	0.03125	0.1625	0.26875	0.025	0.15	0.53125	0.03125	0.175	0.525
38000	0.05625	0.1875	0.26875	0.025	0.125	0.55	0.0375	0.1875	0.55
38400	0.08125	0.2	0.26875	0	0.1125	0.53125	0.0375	0.1875	0.525
38800	0.10625	0.2	0.26875	0	0.0875	0.55625	0.0625	0.1875	0.525
39200	0.10625	0.2125	0.26875	0	0.075	0.55625	0.0625	0.1875	0.5625
39600	0.13125	0.2375	0.26875	0	0.1	0.5125	0.08125	0.1875	0.5375
40000	0.13125	0.25	0.26875	0	0.1125	0.48125	0.10625	0.2	0.49375
40400	0.15625	0.25	0.26875	0	0.125	0.5	0.1125	0.2375	0.49375
40800	0.1375	0.25	0.25	0	0.125	0.53125	0.1125	0.2375	0.5375
41200	0.1375	0.25	0.25	0	0.1375	0.56875	0.11875	0.25	0.54375
41600	0.1625	0.25	0.25	0	0.1375	0.5875	0.14375	0.2625	0.54375
42000	0.14375	0.25	0.26875	0	0.15	0.56875	0.14375	0.2625	0.5625
42400	0.14375	0.25	0.26875	0	0.15	0.5875	0.15	0.2625	0.6
42800	0.14375	0.25	0.2875	0	0.1625	0.5875	0.15	0.2875	0.60625
43200	0.15	0.25	0.2875	0	0.1625	0.5875	0.15	0.2875	0.56875
43600	0.13125	0.25	0.2875	0	0.1625	0.63125	0.13125	0.2875	0.6125
44000	0.15625	0.25	0.2875	0	0.1875	0.6875	0.13125	0.2875	0.61875
44400	0.15625	0.25	0.2875	0	0.1625	0.68125	0.15	0.275	0.59375
44800	0.175	0.25	0.2875	0.00625	0.1875	0.65625	0.15	0.275	0.575
45200	0.19375	0.25	0.2875	0.0125	0.1875	0.64375	0.14375	0.2375	0.54375
45600	0.19375	0.25	0.30625	0.0375	0.2	0.60625	0.14375	0.2375	0.56875
46000	0.2125	0.25	0.2875	0.0375	0.1875	0.6	0.14375	0.2375	0.525
46400	0.2125	0.25	0.2875	0.0375	0.1875	0.55625	0.14375	0.2375	0.5125
46800	0.2125	0.25	0.26875	0.0375	0.2	0.53125	0.125	0.2375	0.5375
47200	0.23125	0.25	0.26875	0.0375	0.2	0.54375	0.125	0.2375	0.5625
47600	0.25	0.25	0.2875	0.0375	0.175	0.55	0.14375	0.2375	0.56875
48000	0.25	0.25	0.30625	0.0375	0.1375	0.51875	0.14375	0.2375	0.60625
48400	0.25	0.25	0.30625	0.0375	0.125	0.5	0.14375	0.2375	0.64375
48800	0.25	0.25	0.30625	0.03125	0.1125	0.48125	0.16875	0.25	0.65625
49200	0.25	0.25	0.30625	0.025	0.125	0.4875	0.175	0.275	0.6625
49600	0.25	0.25	0.2875	0	0.1	0.51875	0.15625	0.275	0.65625
50000	0.25	0.25	0.30625	0	0.1375	0.55	0.15625	0.275	0.65625
50400	0.25	0.25	0.33125	0	0.125	0.5625	0.175	0.275	0.60625
50800	0.25	0.25	0.33125	0	0.1125	0.5625	0.175	0.25	0.55625
51200	0.25	0.25	0.33125	0	0.125	0.54375	0.175	0.25	0.53125
51600	0.25	0.25	0.3125	0	0.125	0.525	0.175	0.25	0.48125
52000	0.25	0.25	0.3125	0	0.125	0.5	0.15	0.25	0.475
52400	0.25	0.25	0.33125	0	0.125	0.5	0.15	0.25	0.41875
52800	0.25	0.25	0.33125	0	0.125	0.50625	0.13125	0.25	0.4
53200	0.25	0.25	0.35625	0	0.0875	0.5	0.13125	0.25	0.38125
53600	0.25	0.25	0.35625	0	0.1	0.50625	0.13125	0.25	0.3625
54000	0.25	0.25	0.3375	0	0.0625	0.46875	0.125	0.25	0.4
54400	0.25	0.25	0.33125	0.025	0.1	0.48125	0.125	0.25	0.41875
54800	0.25	0.25	0.33125	0.025	0.0875	0.50625	0.14375	0.275	0.4625
55200	0.25	0.25	0.35	0.025	0.075	0.50625	0.14375	0.275	0.5
55600	0.25	0.25	0.36875	0.025	0.1	0.54375	0.11875	0.275	0.54375
56000	0.25	0.25	0.375	0.025	0.1125	0.54375	0.11875	0.3	0.53125
56400	0.25	0.25	0.38125	0.025	0.125	0.525	0.09375	0.3	0.58125
56800	0.25	0.25	0.40625	0.025	0.1125	0.55625	0.09375	0.3	0.60625
57200	0.25	0.25	0.40625	0.03125	0.1375	0.56875	0.1125	0.3	0.64375
57600	0.25	0.25	0.43125	0.03125	0.1375	0.55625	0.1125	0.3	0.6625
58000	0.25	0.25	0.45625	0.03125	0.15	0.60625	0.1125	0.35	0.65625
58400	0.25	0.25	0.45625	0.00625	0.1375	0.625	0.0875	0.3375	0.675
58800	0.25	0.25	0.475	0.03125	0.1625	0.61875	0.0875	0.3125	0.675
59200	0.25	0.2625	0.48125	0.03125	0.175	0.61875	0.0875	0.3125	0.6625
59600	0.25	0.275	0.4875	0.03125	0.15	0.58125	0.0875	0.3125	0.61875
60000	0.25	0.2875	0.4875	0.03125	0.15	0.6125	0.1125	0.2875	0.575
60400	0.25	0.3	0.4875	0.03125	0.1375	0.6125	0.1375	0.2875	0.54375
60800	0.25	0.3125	0.4875	0.03125	0.1375	0.59375	0.15625	0.2875	0.51875
61200	0.25	0.3125	0.4875	0.025	0.1125	0.5375	0.15625	0.2875	0.50625
61600	0.25	0.3125	0.4875	0.025	0.1	0.575	0.175	0.3	0.5125
62000	0.25	0.3125	0.4875	0.025	0.0875	0.55	0.18125	0.25	0.5125
62400	0.25	0.3125	0.49375	0.025	0.075	0.54375	0.1875	0.2625	0.49375
62800	0.25	0.3125	0.5	0	0.0875	0.56875	0.1875	0.2625	0.475
63200	0.25	0.325	0.5	0	0.1	0.575	0.2125	0.2875	0.475
63600	0.25	0.325	0.5	0	0.1125	0.56875	0.2375	0.2875	0.49375
64000	0.25	0.325	0.5	0	0.1	0.55625	0.21875	0.2875	0.5125
64400	0.25	0.3125	0.5	0	0.125	0.58125	0.19375	0.2875	0.51875
64800	0.25	0.3	0.475	0	0.175	0.56875	0.16875	0.3	0.55
65200	0.25	0.3125	0.475	0	0.2	0.61875	0.16875	0.325	0.575
65600	0.25	0.325	0.475	0.00625	0.225	0.575	0.16875	0.3125	0.55
66000	0.25	0.3375	0.475	0.0125	0.25	0.55625	0.1875	0.3125	0.525
66400	0.25	0.35	0.475	0.0125	0.2375	0.5375	0.20625	0.3125	0.525
66800	0.25	0.375	0.475	0.0125	0.25	0.51875	0.20625	0.325	0.525
67200	0.25	0.3625	0.475	0.0125	0.25	0.51875	0.18125	0.325	0.5625
67600	0.25	0.375	0.475	0.0125	0.275	0.51875	0.15625	0.325	0.6125
68000	0.25	0.3875	0.475	0.0125	0.275	0.5	0.175	0.325	0.6375
68400	0.25	0.4125	0.475	0.0125	0.275	0.5	0.175	0.325	0.6375
68800	0.25	0.425	0.5	0.0125	0.225	0.49375	0.2	0.325	0.65625
69200	0.25	0.4375	0.5	0.0125	0.2	0.4625	0.2	0.3	0.65625
69600	0.25	0.4375	0.5	0.00625	0.175	0.46875	0.175	0.3125	0.68125
70000	0.25	0.45	0.5	0	0.15	0.4875	0.175	0.3125	0.65625
70400	0.275	0.4625	0.5	0	0.1625	0.49375	0.175	0.3125	0.70625
70800	0.275	0.45	0.5	0	0.125	0.49375	0.15	0.3	0.68125
71200	0.28125	0.4625	0.5	0	0.1	0.50625	0.125	0.275	0.65625
71600	0.28125	0.4625	0.5	0	0.0625	0.54375	0.125	0.275	0.60625
72000	0.30625	0.4625	0.5	0	0.0625	0.525	0.125	0.275	0.58125
72400	0.33125	0.4625	0.5	0	0.0625	0.525	0.13125	0.275	0.6
72800	0.33125	0.4625	0.5	0	0.0875	0.54375	0.13125	0.2625	0.5875
73200	0.33125	0.4625	0.5	0	0.0875	0.54375	0.10625	0.2625	0.58125
73600	0.35625	0.475	0.5	0	0.0875	0.53125	0.13125	0.2625	0.5625
74000	0.38125	0.475	0.5	0	0.0875	0.4875	0.13125	0.2625	0.6125
74400	0.3625	0.475	0.5	0.025	0.1	0.48125	0.13125	0.2625	0.54375
74800	0.3625	0.475	0.5	0.025	0.1125	0.5	0.15625	0.275	0.56875
75200	0.38125	0.475	0.5	0.025	0.1	0.5	0.1625	0.2875	0.575
75600	0.40625	0.475	0.5	0.025	0.1125	0.4625	0.1625	0.2875	0.58125
76000	0.3875	0.475	0.5	0.025	0.125	0.5125	0.1625	0.2875	0.58125
76400	0.3875	0.475	0.5	0.025	0.1	0.50625	0.18125	0.2875	0.58125
76800	0.4125	0.4875	0.5	0.03125	0.1125	0.5125	0.15625	0.2875	0.58125
77200	0.4125	0.4875	0.5	0.03125	0.125	0.51875	0.18125	0.2875	0.58125
77600	0.39375	0.4875	0.5	0.03125	0.125	0.50625	0.18125	0.275	0.58125
78000	0.39375	0.4875	0.5	0.03125	0.1375	0.5125	0.1625	0.275	0.5875
78400	0.39375	0.4875	0.5	0.00625	0.125	0.53125	0.14375	0.275	0.5875
78800	0.4	0.5	0.5	0.0125	0.125	0.53125	0.11875	0.25	0.5625
79200	0.38125	0.5	0.5	0.0375	0.15	0.5125	0.1375	0.25	0.5875
79600	0.38125	0.5	0.5	0.0375	0.15	0.5125	0.14375	0.2625	0.5875
80000	0.4	0.5	0.5	0.0375	0.1625	0.4875	0.14375	0.2625	0.5875
80400	0.4	0.5	0.5	0.0375	0.175	0.5125	0.125	0.2625	0.54375
80800	0.38125	0.5	0.51875	0.03125	0.1375	0.4625	0.15	0.2625	0.53125
81200	0.38125	0.5	0.5375	0.03125	0.175	0.4625	0.13125	0.2625	0.50625
81600	0.4	0.5	0.5375	0.03125	0.25	0.5125	0.10625	0.3125	0.53125
82000	0.4	0.5	0.5375	0.03125	0.275	0.5375	0.1	0.3375	0.5
82400	0.41875	0.5	0.55625	0.03125	0.275	0.5375	0.09375	0.3375	0.51875
82800	0.4375	0.5	0.55625	0.03125	0.3	0.5375	0.11875	0.35	0.55625
83200	0.45625	0.5	0.575	0.00625	0.2875	0.54375	0.11875	0.35	0.53125
83600	0.45625	0.5	0.575	0.00625	0.275	0.53125	0.1375	0.3375	0.525
84000	0.45625	0.5	0.59375	0.00625	0.25	0.5	0.1375	0.35	0.58125
84400	0.45625	0.5	0.6125	0.00625	0.2625	0.48125	0.1375	0.35	0.58125
84800	0.475	0.5	0.59375	0.0125	0.2875	0.50625	0.1375	0.35	0.58125
85200	0.5	0.5	0.575	0.0125	0.25	0.51875	0.13125	0.35	0.58125
85600	0.5	0.5	0.575	0.0125	0.175	0.50625	0.13125	0.325	0.59375
86000	0.5	0.5	0.59375	0.0125	0.1375	0.50625	0.15625	0.3	0.56875
86400	0.5	0.5	0.59375	0.0375	0.15	0.49375	0.18125	0.3125	0.575
86800	0.5	0.5	0.6125	0.03125	0.125	0.475	0.18125	0.3125	0.5375
87200	0.5	0.5125	0.61875	0.05625	0.15	0.475	0.18125	0.3	0.49375
87600	0.5	0.5125	0.61875	0.0625	0.175	0.48125	0.18125	0.3	0.49375
88000	0.5	0.5125	0.625	0.0625	0.175	0.50625	0.18125	0.2875	0.4875
88400	0.5	0.5125	0.60625	0.0625	0.15	0.51875	0.18125	0.2875	0.5125
88800	0.5	0.5125	0.60625	0.05625	0.1375	0.54375	0.15625	0.2625	0.46875
89200	0.5	0.5125	0.625	0.05625	0.125	0.51875	0.18125	0.2625	0.5125
89600	0.5	0.5125	0.65	0.08125	0.1625	0.50625	0.20625	0.2375	0.4875
90000	0.5	0.5125	0.66875	0.10625	0.1875	0.50625	0.20625	0.2375	0.50625
90400	0.5	0.5125	0.675	0.0875	0.1875	0.50625	0.20625	0.225	0.5
90800	0.48125	0.5125	0.68125	0.0875	0.1625	0.525	0.20625	0.225	0.51875
91200	0.48125	0.5	0.68125	0.0625	0.15	0.5375	0.20625	0.2375	0.5625
91600	0.48125	0.5	0.7	0.05625	0.125	0.53125	0.20625	0.2375	0.5625
92000	0.48125	0.5	0.69375	0.08125	0.15	0.5125	0.1875	0.25	0.5375
92400	0.48125	0.5	0.7375	0.08125	0.15	0.46875	0.1875	0.2625	0.5625
92800	0.48125	0.5	0.7625	0.08125	0.1375	0.44375	0.19375	0.2875	0.60625
93200	0.48125	0.5	0.76875	0.08125	0.1625	0.45	0.175	0.3	0.5875
93600	0.48125	0.5	0.76875	0.05625	0.1375	0.44375	0.175	0.3	0.5875
94000	0.48125	0.5	0.775	0.03125	0.125	0.4375	0.1625	0.325	0.59375
94400	0.48125	0.5	0.775	0.025	0.1375	0.4375	0.1625	0.325	0.59375
94800	0.5	0.5	0.775	0.025	0.1625	0.4125	0.1625	0.3625	0.625
95200	0.5	0.5	0.775	0.025	0.175	0.4	0.14375	0.35	0.65
95600	0.5	0.5	0.78125	0.025	0.1875	0.425	0.14375	0.3625	0.68125
96000	0.5	0.5	0.7875	0	0.175	0.44375	0.1625	0.35	0.6625
96400	0.5	0.5	0.76875	0	0.175	0.49375	0.15625	0.3375	0.65
96800	0.5	0.5	0.7625	0	0.175	0.49375	0.175	0.3375	0.65
97200	0.5	0.5	0.7625	0	0.15	0.51875	0.19375	0.325	0.65
97600	0.5	0.5	0.7625	0	0.1375	0.51875	0.16875	0.325	0.63125
98000	0.5	0.5	0.74375	0.025	0.15	0.525	0.1625	0.3	0.625
98400	0.48125	0.5	0.74375	0.025	0.125	0.54375	0.1625	0.325	0.65
98800	0.48125	0.5	0.74375	0.025	0.1	0.54375	0.1375	0.275	0.6
99200	0.48125	0.5	0.74375	0.025	0.0625	0.54375	0.1375	0.2875	0.55625
99600	0.48125	0.5	0.7625	0.025	0.0625	0.55	0.1125	0.275	0.53125
100000	0.48125	0.5	0.7625	0.025	0.05	0.5625	0.0875	0.275	0.54375
100400	0.48125	0.5	0.78125	0.025	0.075	0.5625	0.0875	0.275	0.50625
100800	0.48125	0.5	0.80625	0.025	0.075	0.5875	0.06875	0.3	0.50625
101200	0.48125	0.5	0.80625	0.025	0.075	0.5875	0.05	0.3	0.4875
101600	0.48125	0.5	0.80625	0.025	0.0875	0.63125	0.075	0.3	0.5125
102000	0.48125	0.5	0.80625	0	0.0625	0.65	0.09375	0.325	0.54375
102400	0.5	0.5	0.80625	0	0.075	0.63125	0.09375	0.3	0.525
102800	0.5	0.5	0.80625	0	0.075	0.65625	0.11875	0.3125	0.54375
103200	0.5	0.5	0.80625	0	0.1125	0.65625	0.11875	0.3	0.5625
103600	0.5	0.5	0.7875	0	0.1	0.6125	0.125	0.3	0.5625
104000	0.5	0.5	0.7875	0.00625	0.125	0.625	0.125	0.3125	0.56875
104400	0.5	0.5	0.76875	0.00625	0.125	0.58125	0.125	0.3125	0.6125
104800	0.5	0.5	0.75	0.00625	0.125	0.55625	0.125	0.2875	0.59375
105200	0.5	0.5	0.76875	0.00625	0.125	0.55625	0.125	0.2875	0.625
105600	0.5	0.5	0.7875	0.00625	0.1125	0.51875	0.125	0.2875	0.58125
106000	0.5	0.5	0.80625	0.00625	0.125	0.49375	0.125	0.2625	0.56875
106400	0.5	0.5	0.80625	0.00625	0.1	0.48125	0.125	0.2625	0.5625
106800	0.5	0.5	0.80625	0.00625	0.1125	0.4875	0.1	0.275	0.56875
107200	0.5	0.5	0.80625	0.00625	0.1	0.50625	0.11875	0.2875	0.55
107600	0.5	0.5	0.80625	0.00625	0.1375	0.55	0.1375	0.2875	0.55
108000	0.5	0.5	0.80625	0.00625	0.1375	0.53125	0.1375	0.2875	0.55625
108400	0.5	0.5	0.80625	0.00625	0.125	0.55	0.1625	0.3	0.58125
108800	0.5	0.5	0.80625	0.00625	0.125	0.5875	0.1625	0.3	0.575
109200	0.5	0.5	0.7875	0.00625	0.1375	0.59375	0.1625	0.3	0.5625
109600	0.5	0.5125	0.76875	0.00625	0.1375	0.5625	0.1625	0.3	0.60625
110000	0.5	0.5125	0.75	0.00625	0.1375	0.5875	0.1625	0.3125	0.61875
110400	0.5	0.5125	0.75	0.00625	0.15	0.61875	0.1625	0.35	0.65
110800	0.5	0.5125	0.75	0.00625	0.15	0.6125	0.1875	0.3375	0.65
111200	0.48125	0.5125	0.75	0.00625	0.15	0.6125	0.1875	0.325	0.66875
111600	0.48125	0.5125	0.75	0.00625	0.1375	0.60625	0.1625	0.3125	0.6875
112000	0.48125	0.5125	0.76875	0	0.1125	0.60625	0.16875	0.3	0.68125
112400	0.48125	0.5125	0.76875	0	0.125	0.5875	0.16875	0.2875	0.65
112800	0.48125	0.5125	0.79375	0	0.1625	0.55625	0.16875	0.2875	0.63125
113200	0.48125	0.5125	0.79375	0	0.15	0.53125	0.16875	0.3	0.65625
113600	0.48125	0.5	0.79375	0	0.15	0.5375	0.15	0.3	0.65
114000	0.48125	0.5	0.79375	0	0.1375	0.51875	0.13125	0.2875	0.6
114400	0.48125	0.5	0.79375	0	0.15	0.5	0.1125	0.25	0.59375
114800	0.48125	0.5	0.8125	0	0.1375	0.45	0.1125	0.2625	0.64375
115200	0.5	0.5	0.83125	0	0.1125	0.43125	0.09375	0.2625	0.61875
115600	0.5	0.5	0.85625	0	0.0875	0.4125	0.1	0.275	0.575
116000	0.5	0.5	0.8625	0	0.1125	0.4125	0.11875	0.3	0.60625
116400	0.5	0.5	0.88125	0	0.0875	0.4375	0.11875	0.3125	0.6125
116800	0.5	0.5125	0.875	0	0.075	0.45625	0.1375	0.3125	0.65625
117200	0.5	0.5125	0.89375	0	0.0875	0.45	0.15625	0.3	0.64375
117600	0.5	0.5125	0.91875	0	0.125	0.49375	0.175	0.3125	0.65
118000	0.5	0.5125	0.9375	0	0.125	0.4625	0.19375	0.3125	0.69375
118400	0.5	0.5125	0.95625	0	0.1	0.46875	0.1875	0.325	0.69375
118800	0.5	0.525	0.9625	0	0.1375	0.5	0.1875	0.325	0.68125
119200	0.5	0.525	0.9625	0	0.1375	0.46875	0.18125	0.325	0.6875
119600	0.5	0.525	0.9625	0.00625	0.175	0.475	0.2	0.325	0.6875
120000	0.475	0.525	0.95625	0.0125	0.175	0.5125	0.175	0.3	0.675
120400	0.475	0.5375	0.95625	0.0125	0.175	0.525	0.15625	0.2875	0.675
120800	0.475	0.5375	0.95625	0.0125	0.1875	0.53125	0.1375	0.2875	0.68125
121200	0.475	0.5375	0.95625	0.0125	0.2	0.53125	0.1375	0.3	0.675
121600	0.475	0.5375	0.95625	0.0125	0.1625	0.55	0.1375	0.325	0.68125
122000	0.475	0.55	0.9625	0.0125	0.1625	0.55625	0.1375	0.325	0.65625
122400	0.475	0.5625	0.96875	0.0125	0.1625	0.55	0.14375	0.3375	0.6375
122800	0.475	0.55	0.96875	0.0125	0.15	0.5875	0.11875	0.3375	0.6
123200	0.475	0.55	0.975	0.0125	0.1625	0.66875	0.14375	0.3375	0.575
123600	0.475	0.55	0.96875	0.00625	0.125	0.64375	0.14375	0.3375	0.575
124000	0.5	0.55	0.975	0.00625	0.125	0.6	0.16875	0.3625	0.5375
124400	0.48125	0.5375	0.975	0.00625	0.1375	0.60625	0.175	0.3875	0.51875
124800	0.48125	0.525	0.98125	0.00625	0.1375	0.6	0.19375	0.3875	0.4875
125200	0.48125	0.525	0.98125	0.0125	0.1375	0.64375	0.19375	0.3875	0.4625
125600	0.48125	0.525	0.98125	0.0125	0.15	0.6	0.19375	0.35	0.43125
126000	0.48125	0.5125	0.98125	0.0125	0.15	0.63125	0.175	0.35	0.4375
126400	0.48125	0.5	0.98125	0.0125	0.15	0.65625	0.19375	0.325	0.43125
126800	0.48125	0.5	0.98125	0.01875	0.15	0.61875	0.2	0.3125	0.43125
127200	0.48125	0.5	0.98125	0.01875	0.15	0.60625	0.2	0.325	0.48125
127600	0.48125	0.5	0.9875	0.01875	0.175	0.63125	0.175	0.325	0.48125
128000	0.48125	0.5	0.9875	0.0125	0.15	0.63125	0.15625	0.3	0.48125
128400	0.5	0.5125	0.99375	0.0125	0.1625	0.6125	0.14375	0.275	0.5
128800	0.5	0.5125	0.99375	0.0125	0.15	0.5875	0.14375	0.3	0.53125
129200	0.5	0.5125	1	0.00625	0.175	0.56875	0.11875	0.3	0.53125
129600	0.5	0.525	1	0.00625	0.1875	0.59375	0.11875	0.3125	0.55625
130000	0.5	0.525	1	0.00625	0.2125	0.5875	0.1375	0.3125	0.53125
130400	0.5	0.5375	1	0.00625	0.2125	0.55625	0.1125	0.3125	0.53125
130800	0.5	0.5375	1	0	0.2	0.56875	0.1125	0.3125	0.53125
131200	0.5	0.5375	1	0	0.2	0.56875	0.1125	0.3	0.48125
131600	0.5	0.5375	1	0.00625	0.2	0.5625	0.11875	0.3125	0.525
132000	0.5	0.5375	1	0.00625	0.2	0.55625	0.11875	0.3125	0.51875
132400	0.5	0.525	1	0.00625	0.2	0.55625	0.14375	0.3125	0.49375
132800	0.5	0.525	1	0.00625	0.2	0.5875	0.125	0.3	0.51875
133200	0.5	0.525	1	0.00625	0.15	0.5875	0.15	0.2875	0.5125
133600	0.5	0.5125	1	0.00625	0.125	0.5375	0.15	0.275	0.46875
134000	0.5	0.525	1	0.00625	0.125	0.5375	0.13125	0.3	0.51875
134400	0.5	0.525	1	0.00625	0.125	0.55625	0.15625	0.3	0.525
134800	0.5	0.5375	1	0.00625	0.1125	0.56875	0.15	0.3	0.525
135200	0.5	0.5375	1	0.00625	0.1125	0.50625	0.13125	0.3	0.5625
135600	0.5	0.5375	1	0	0.1125	0.50625	0.15	0.2875	0.5375
136000	0.5	0.5375	1	0	0.1375	0.53125	0.16875	0.2875	0.5375
136400	0.5	0.5625	1	0	0.1125	0.50625	0.14375	0.2875	0.5375
136800	0.5	0.575	1	0	0.1	0.45625	0.14375	0.275	0.4625
137200	0.5	0.575	1	0	0.1125	0.4375	0.14375	0.275	0.46875
137600	0.5	0.6	1	0	0.1125	0.4625	0.11875	0.2625	0.49375
138000	0.5	0.5875	1	0	0.1125	0.45625	0.11875	0.2375	0.4625
138400	0.5	0.6	1	0	0.1125	0.4125	0.11875	0.2375	0.45625
138800	0.5	0.6125	1	0	0.125	0.3875	0.11875	0.2375	0.45625
139200	0.5	0.65	1	0	0.1375	0.3875	0.1125	0.2625	0.46875
139600	0.5	0.6625	1	0	0.125	0.3875	0.1125	0.2625	0.475
140000	0.5	0.675	1	0	0.125	0.36875	0.1125	0.2625	0.5125
140400	0.5	0.7	1	0	0.1625	0.39375	0.11875	0.2625	0.5375
140800	0.5	0.7125	1	0	0.15	0.3875	0.125	0.2875	0.5625
141200	0.50625	0.75	1	0	0.1625	0.38125	0.10625	0.2875	0.5625
141600	0.50625	0.75	1	0	0.1875	0.4	0.1125	0.3125	0.5625
142000	0.50625	0.7625	1	0	0.1625	0.425	0.13125	0.3125	0.5875
142400	0.50625	0.75	1	0	0.1625	0.425	0.13125	0.3125	0.61875
142800	0.50625	0.75	1	0	0.175	0.425	0.15625	0.3125	0.6125
143200	0.50625	0.7375	1	0	0.1625	0.44375	0.1625	0.2875	0.5625
143600	0.48125	0.7625	1	0	0.15	0.425	0.1625	0.2875	0.6
144000	0.48125	0.775	1	0.00625	0.1625	0.475	0.1625	0.2875	0.5625
144400	0.48125	0.75	1	0.00625	0.1625	0.49375	0.18125	0.3125	0.54375
144800	0.48125	0.75	1	0.00625	0.1625	0.51875	0.19375	0.3	0.56875
145200	0.475	0.7375	1	0.00625	0.1375	0.51875	0.2125	0.3	0.5875
145600	0.475	0.75	1	0.00625	0.125	0.51875	0.2125	0.2875	0.6
146000	0.475	0.775	1	0.00625	0.125	0.51875	0.19375	0.3125	0.60625
146400	0.475	0.8	1	0.00625	0.15	0.55	0.175	0.325	0.58125
146800	0.475	0.8125	1	0.00625	0.1375	0.5625	0.175	0.325	0.6125
147200	0.475	0.825	1	0.00625	0.1375	0.5625	0.175	0.325	0.65
147600	0.5	0.825	1	0.00625	0.175	0.5875	0.15625	0.325	0.60625
148000	0.5	0.85	1	0	0.1625	0.51875	0.1375	0.325	0.625
148400	0.5	0.875	1	0	0.1375	0.49375	0.1375	0.3375	0.66875
148800	0.5	0.9	1	0	0.1375	0.53125	0.11875	0.325	0.6375
149200	0.5	0.925	1	0	0.1625	0.53125	0.09375	0.325	0.61875
149600	0.5	0.925	1	0	0.1625	0.55	0.0875	0.325	0.625
150000	0.5	0.925	1	0	0.175	0.56875	0.10625	0.3	0.625
150400	0.5	0.9125	1	0	0.1625	0.54375	0.10625	0.2875	0.625
150800	0.5	0.9125	1	0	0.1625	0.50625	0.10625	0.2875	0.61875
151200	0.5	0.925	1	0	0.15	0.5125	0.125	0.2875	0.625
151600	0.5	0.9375	1	0	0.1125	0.50625	0.14375	0.2875	0.63125
152000	0.5	0.9375	1	0	0.0875	0.5	0.1375	0.275	0.61875
152400	0.5	0.9375	1	0	0.1	0.5	0.1375	0.2375	0.59375
152800	0.5	0.9375	1	0	0.1	0.44375	0.15625	0.2375	0.59375
153200	0.5	0.9375	1	0	0.0875	0.46875	0.1625	0.2375	0.5875
153600	0.5	0.95	1	0	0.1	0.45625	0.1875	0.2375	0.6
154000	0.5	0.9625	1	0	0.0875	0.40625	0.1875	0.25	0.59375
154400	0.5	0.9875	1	0	0.1	0.45	0.18125	0.2625	0.6125
154800	0.5	1	1	0.00625	0.125	0.49375	0.18125	0.2625	0.56875
155200	0.5	1	1	0.0125	0.15	0.53125	0.18125	0.2625	0.525
155600	0.5	0.9875	1	0.01875	0.175	0.5375	0.1625	0.2625	0.54375
156000	0.5	0.975	1	0.01875	0.2	0.58125	0.1875	0.275	0.5375
156400	0.5	0.9625	1	0.01875	0.1875	0.5625	0.1875	0.275	0.51875
156800	0.5	0.95	1	0.01875	0.1875	0.6	0.1875	0.275	0.54375
157200	0.48125	0.9375	1	0.01875	0.1875	0.575	0.20625	0.275	0.525
157600	0.4875	0.925	1	0.01875	0.1625	0.53125	0.20625	0.275	0.4875
158000	0.49375	0.9125	1	0.025	0.1875	0.54375	0.1875	0.275	0.4875
158400	0.49375	0.9	1	0.03125	0.1875	0.5375	0.2125	0.2625	0.4625
158800	0.49375	0.8875	1	0.025	0.175	0.51875	0.2125	0.2875	0.4875
159200	0.49375	0.875	1	0.01875	0.15	0.45	0.2125	0.2875	0.525
159600	0.5	0.875	1	0.01875	0.15	0.45	0.2125	0.2875	0.54375
160000	0.5	0.875	1	0.01875	0.125	0.43125	0.2125	0.2875	0.5625
160400	0.5	0.875	1	0.01875	0.125	0.43125	0.2125	0.2875	0.575
160800	0.50625	0.875	1	0.01875	0.125	0.4375	0.2125	0.2875	0.56875
161200	0.525	0.875	1	0.01875	0.1125	0.4125	0.2125	0.2875	0.60625
161600	0.51875	0.875	1	0.01875	0.125	0.45	0.2125	0.2875	0.5875
162000	0.5125	0.875	1	0.0125	0.1	0.4625	0.23125	0.275	0.54375
162400	0.5125	0.875	1	0.00625	0.1	0.425	0.23125	0.2875	0.55
162800	0.5125	0.875	1	0.0125	0.1	0.4	0.23125	0.275	0.56875
163200	0.5125	0.875	1	0.0375	0.125	0.44375	0.2125	0.3	0.575
163600	0.50625	0.875	1	0.03125	0.125	0.41875	0.23125	0.3	0.5125
164000	0.5125	0.875	1	0.03125	0.15	0.4	0.20625	0.2875	0.525
164400	0.51875	0.875	1	0.0375	0.1625	0.41875	0.18125	0.2875	0.53125
164800	0.5125	0.875	1	0.0375	0.1875	0.4125	0.18125	0.2875	0.49375
165200	0.5125	0.875	1	0.0625	0.2125	0.44375	0.18125	0.2875	0.5
165600	0.51875	0.875	1	0.0625	0.2125	0.475	0.18125	0.2875	0.525
166000	0.525	0.875	1	0.0625	0.2125	0.49375	0.18125	0.2875	0.54375
166400	0.53125	0.875	1	0.06875	0.225	0.5375	0.18125	0.275	0.5375
166800	0.53125	0.875	1	0.0625	0.225	0.5375	0.18125	0.2625	0.51875
167200	0.5375	0.875	1	0.0375	0.2	0.54375	0.175	0.2375	0.475
167600	0.5375	0.875	1	0.0375	0.225	0.59375	0.15625	0.2375	0.475
168000	0.5375	0.875	1	0.04375	0.225	0.61875	0.18125	0.25	0.45
168400	0.5375	0.875	1	0.0375	0.2125	0.6	0.20625	0.25	0.45625
168800	0.54375	0.875	1	0.0375	0.2125	0.6	0.20625	0.25	0.45625
169200	0.54375	0.875	1	0.0125	0.2	0.61875	0.20625	0.25	0.4125
169600	0.5375	0.875	1	0.0125	0.2125	0.5875	0.20625	0.25	0.40625
170000	0.5375	0.875	1	0.0125	0.2375	0.575	0.20625	0.25	0.40625
170400	0.5375	0.875	1	0.0125	0.2375	0.58125	0.20625	0.25	0.425
170800	0.54375	0.8875	1	0.0125	0.225	0.60625	0.1875	0.2625	0.44375
171200	0.5625	0.8875	1	0.0375	0.275	0.5875	0.2125	0.2625	0.4625
171600	0.56875	0.8875	1	0.0375	0.2625	0.58125	0.23125	0.2625	0.50625
172000	0.56875	0.8875	1	0.03125	0.2375	0.58125	0.23125	0.2875	0.53125
172400	0.56875	0.9	1	0.03125	0.225	0.625	0.23125	0.2875	0.5
172800	0.56875	0.9	1	0.0375	0.225	0.6125	0.20625	0.275	0.54375
173200	0.575	0.9	1	0.0375	0.2125	0.60625	0.20625	0.275	0.58125
173600	0.58125	0.9	1	0.0375	0.2	0.59375	0.18125	0.2875	0.5875
174000	0.58125	0.9	1	0.04375	0.2	0.56875	0.18125	0.3	0.6125
174400	0.58125	0.9	1	0.0375	0.1875	0.54375	0.1625	0.3	0.63125
174800	0.58125	0.8875	1	0.04375	0.2	0.54375	0.1625	0.2875	0.625
175200	0.5625	0.8875	1	0.01875	0.15	0.55625	0.1375	0.3	0.65
175600	0.5625	0.8875	1	0.01875	0.1375	0.55625	0.1125	0.3	0.65
176000	0.5625	0.8875	1	0.01875	0.15	0.56875	0.0875	0.2875	0.625
176400	0.5625	0.875	1	0.04375	0.175	0.56875	0.0875	0.2875	0.65
176800	0.5625	0.875	1	0.0375	0.1625	0.60625	0.09375	0.3	0.625
177200	0.5625	0.875	1	0.0375	0.175	0.59375	0.08125	0.325	0.6125
177600	0.5625	0.8875	1	0.0375	0.175	0.5875	0.08125	0.3375	0.63125
178000	0.5625	0.8875	1	0.03125	0.15	0.5875	0.0625	0.3375	0.63125
178400	0.5625	0.8875	1	0.03125	0.125	0.625	0.08125	0.3375	0.6125
178800	0.58125	0.9	1	0.025	0.1125	0.61875	0.1	0.3625	0.61875
179200	0.58125	0.9125	1	0.025	0.15	0.63125	0.125	0.35	0.61875
179600	0.58125	0.925	1	0.025	0.15	0.63125	0.15	0.35	0.59375
180000	0.58125	0.925	1	0.025	0.1375	0.61875	0.15625	0.35	0.6125
180400	0.58125	0.925	1	0.00625	0.1375	0.59375	0.13125	0.325	0.59375
180800	0.58125	0.9375	1	0.00625	0.175	0.58125	0.15	0.325	0.6125
181200	0.58125	0.9375	1	0.00625	0.1875	0.58125	0.1375	0.3	0.625
181600	0.6	0.9375	1	0.0125	0.2	0.60625	0.1625	0.3	0.625
182000	0.6	0.95	1	0.0125	0.225	0.6125	0.18125	0.3	0.65625
182400	0.6	0.95	1	0.01875	0.25	0.59375	0.1625	0.3	0.6625
182800	0.58125	0.95	1	0.01875	0.2625	0.625	0.1625	0.3	0.66875
183200	0.58125	0.95	1	0.025	0.25	0.59375	0.1625	0.3	0.64375
183600	0.58125	0.95	1	0.025	0.25	0.59375	0.14375	0.3	0.675
184000	0.58125	0.95	1	0.025	0.2625	0.5875	0.14375	0.2875	0.65
184400	0.58125	0.9625	1	0.01875	0.2375	0.60625	0.15	0.3125	0.6875
184800	0.58125	0.9625	1	0.01875	0.1875	0.55	0.15	0.3125	0.69375
185200	0.58125	0.975	1	0.01875	0.1875	0.58125	0.175	0.3125	0.70625
185600	0.5625	0.975	1	0.0125	0.1875	0.55625	0.175	0.2875	0.70625
186000	0.56875	0.975	1	0.0125	0.175	0.53125	0.175	0.275	0.675
186400	0.56875	0.9875	1	0.00625	0.175	0.50625	0.175	0.275	0.675
186800	0.56875	0.9875	1	0.00625	0.15	0.45	0.175	0.2625	0.6875
187200	0.56875	0.9875	1	0	0.125	0.425	0.175	0.2625	0.69375
187600	0.56875	0.9875	1	0	0.1375	0.40625	0.19375	0.2625	0.7
188000	0.55	1	1	0	0.15	0.43125	0.19375	0.2625	0.7
188400	0.55	1	1	0	0.1625	0.41875	0.2125	0.2625	0.6625
188800	0.55	1	1	0	0.1875	0.4625	0.21875	0.2875	0.64375
189200	0.55	1	1	0	0.1625	0.41875	0.21875	0.2875	0.6125
189600	0.55	1	1	0	0.1375	0.4125	0.19375	0.2875	0.59375
190000	0.55	1	1	0	0.125	0.4375	0.175	0.2875	0.56875
190400	0.55	1	1	0.00625	0.125	0.4375	0.19375	0.3	0.56875
190800	0.56875	1	1	0.00625	0.1625	0.4875	0.19375	0.2875	0.55
191200	0.5875	1	1	0.00625	0.175	0.53125	0.175	0.3125	0.55
191600	0.5875	1	1	0.00625	0.1375	0.5	0.175	0.3125	0.5125
192000	0.60625	1	1	0.00625	0.1125	0.45	0.16875	0.3125	0.5125
192400	0.60625	1	1	0.00625	0.1375	0.46875	0.16875	0.3125	0.50625
192800	0.60625	1	1	0.00625	0.125	0.46875	0.1625	0.2875	0.51875
193200	0.6125	1	1	0.00625	0.1375	0.5	0.1625	0.2875	0.525
193600	0.6125	1	1	0.00625	0.1625	0.5125	0.1875	0.2875	0.51875
194000	0.6125	1	1	0.00625	0.1625	0.5625	0.20625	0.2875	0.51875
194400	0.6125	1	1	0	0.15	0.6125	0.20625	0.275	0.475
194800	0.6	1	1	0.00625	0.1375	0.59375	0.1875	0.2875	0.5
195200	0.5875	1	1	0.00625	0.125	0.55	0.1875	0.2625	0.475
195600	0.59375	1	1	0.00625	0.15	0.6	0.1625	0.2375	0.48125
196000	0.59375	1	1	0.0125	0.1875	0.63125	0.1875	0.2375	0.50625
196400	0.6125	1	1	0.0125	0.15	0.63125	0.1875	0.2375	0.4875
196800	0.61875	1	1	0.0125	0.1375	0.63125	0.1875	0.25	0.475
197200	0.6125	1	1	0.0375	0.15	0.6125	0.1875	0.25	0.49375
197600	0.6125	1	1	0.0375	0.1375	0.60625	0.1875	0.25	0.49375
198000	0.6125	1	1	0.0375	0.15	0.55625	0.1875	0.25	0.475
198400	0.61875	1	1	0.0375	0.1625	0.5375	0.1875	0.25	0.49375
198800	0.61875	1	1	0.05625	0.1625	0.53125	0.1875	0.2375	0.45
199200	0.61875	1	1	0.05625	0.1625	0.55	0.20625	0.2375	0.46875
199600	0.61875	1	1	0.05625	0.15	0.56875	0.23125	0.2625	0.44375
200000	0.625	1	1	0.05	0.1125	0.54375	0.2125	0.2625	0.41875
200400	0.6125	1	1	0.05	0.15	0.575	0.1875	0.2625	0.4375
200800	0.6125	1	1	0.05	0.175	0.5375	0.1875	0.275	0.4625
201200	0.6	1	1	0.025	0.1625	0.53125	0.16875	0.3	0.4625
201600	0.60625	1	1	0.025	0.1625	0.58125	0.16875	0.3125	0.46875
202000	0.60625	1	1	0.0375	0.2	0.6	0.16875	0.325	0.49375
202400	0.60625	1	1	0.0375	0.1875	0.5875	0.15	0.3375	0.5
202800	0.60625	1	1	0.0125	0.1875	0.5875	0.16875	0.3375	0.5
203200	0.60625	1	1	0.0125	0.2375	0.65	0.16875	0.35	0.50625
203600	0.60625	1	1	0.0125	0.225	0.60625	0.16875	0.35	0.525
204000	0.60625	1	1	0.0125	0.25	0.65625	0.16875	0.35	0.53125
204400	0.60625	1	1	0.0125	0.225	0.61875	0.175	0.3625	0.5625
204800	0.60625	1	1	0.0125	0.2	0.675	0.175	0.3375	0.53125
205200	0.625	1	1	0.01875	0.2125	0.65625	0.19375	0.3125	0.5125
205600	0.625	1	1	0.01875	0.2	0.625	0.19375	0.325	0.5375
206000	0.64375	1	1	0.00625	0.1625	0.58125	0.19375	0.325	0.5875
206400	0.64375	1	1	0.00625	0.1625	0.54375	0.1875	0.3125	0.5625
206800	0.64375	1	1	0.00625	0.1375	0.5375	0.1875	0.3125	0.55625
207200	0.625	1	1	0.00625	0.1	0.48125	0.1875	0.3	0.59375
207600	0.625	1	1	0.00625	0.1125	0.4875	0.1875	0.325	0.61875
208000	0.625	1	1	0.00625	0.125	0.4875	0.20625	0.325	0.61875
208400	0.64375	1	1	0.00625	0.1125	0.45	0.225	0.3125	0.56875
208800	0.6625	1	1	0.00625	0.1375	0.45	0.225	0.3125	0.575
209200	0.6625	1	1	0	0.1125	0.475	0.2	0.3125	0.56875
209600	0.6625	1	1	0	0.1375	0.475	0.18125	0.2875	0.5375
210000	0.64375	1	1	0	0.1625	0.51875	0.18125	0.275	0.5
210400	0.64375	1	1	0.025	0.175	0.58125	0.20625	0.3	0.55
210800	0.64375	1	1	0.025	0.1875	0.61875	0.1875	0.3	0.5875
211200	0.68125	1	1	0.025	0.175	0.61875	0.175	0.325	0.575
211600	0.68125	1	1	0.025	0.2	0.6375	0.175	0.3125	0.575
212000	0.68125	1	1	0.025	0.1625	0.5875	0.15625	0.3125	0.55
212400	0.6625	1	1	0.025	0.1875	0.5875	0.15625	0.3125	0.575
212800	0.64375	1	1	0.03125	0.1875	0.575	0.15625	0.3125	0.6125
213200	0.64375	1	1	0.0375	0.2125	0.56875	0.18125	0.3125	0.61875
213600	0.64375	1	1	0.0375	0.2125	0.55625	0.2	0.3625	0.66875
214000	0.64375	1	1	0.0375	0.1875	0.5125	0.2	0.3625	0.65625
214400	0.64375	1	1	0.0125	0.175	0.51875	0.2	0.3375	0.65
214800	0.64375	1	1	0.0125	0.2	0.5125	0.21875	0.3375	0.6125
215200	0.625	1	1	0.0125	0.225	0.5375	0.2375	0.35	0.6125
215600	0.625	1	1	0.01875	0.225	0.5375	0.2125	0.3375	0.56875
216000	0.625	1	1	0.01875	0.25	0.58125	0.23125	0.3375	0.6125
216400	0.625	1	1	0.04375	0.25	0.58125	0.23125	0.3375	0.60625
216800	0.625	1	1	0.0375	0.2375	0.6	0.20625	0.3375	0.58125
217200	0.625	1	1	0.03125	0.225	0.625	0.20625	0.3375	0.55625
217600	0.625	1	1	0.03125	0.2125	0.61875	0.20625	0.2875	0.4875
218000	0.625	1	1	0.05625	0.225	0.6375	0.20625	0.2875	0.4625
218400	0.625	1	1	0.05625	0.2125	0.6	0.18125	0.2875	0.45625
218800	0.625	1	1	0.05625	0.1875	0.58125	0.18125	0.2875	0.4875
219200	0.625	1	1	0.05625	0.1625	0.5375	0.175	0.25	0.4625
219600	0.625	1	1	0.05	0.15	0.49375	0.2	0.25	0.4625
220000	0.625	1	1	0.05625	0.15	0.475	0.18125	0.25	0.46875
220400	0.625	1	1	0.03125	0.125	0.49375	0.18125	0.25	0.46875
220800	0.625	1	1	0.03125	0.125	0.45625	0.18125	0.25	0.43125
221200	0.625	1	1	0.03125	0.15	0.4625	0.18125	0.25	0.45625
221600	0.625	1	1	0.03125	0.15	0.44375	0.1625	0.25	0.475
222000	0.625	1	1	0.00625	0.15	0.44375	0.14375	0.2625	0.51875
222400	0.625	1	1	0.00625	0.175	0.43125	0.16875	0.2625	0.5375
222800	0.625	1	1	0.00625	0.2	0.45	0.15	0.2625	0.4875
223200	0.625	1	1	0.00625	0.225	0.49375	0.15	0.2625	0.48125
223600	0.625	1	1	0.00625	0.225	0.5125	0.15	0.2625	0.48125
224000	0.625	1	1	0	0.2125	0.525	0.16875	0.2875	0.45625
224400	0.625	1	1	0	0.225	0.50625	0.175	0.3125	0.50625
224800	0.625	1	1	0	0.225	0.50625	0.175	0.3375	0.55625
225200	0.625	1	1	0	0.1875	0.48125	0.15	0.3375	0.55625
225600	0.625	1	1	0	0.2	0.48125	0.15	0.3375	0.5375
226000	0.625	1	1	0	0.1875	0.4875	0.15	0.325	0.5125
226400	0.625	1	1	0	0.175	0.4875	0.13125	0.325	0.48125
226800	0.625	1	1	0	0.1625	0.48125	0.125	0.325	0.51875
227200	0.625	1	1	0	0.1625	0.4375	0.125	0.3375	0.54375
227600	0.625	1	1	0	0.1625	0.44375	0.125	0.3375	0.5625
228000	0.64375	1	1	0.00625	0.175	0.44375	0.1	0.3	0.5375
228400	0.64375	1	1	0.0125	0.1875	0.4625	0.09375	0.275	0.4875
228800	0.64375	1	1	0.0125	0.175	0.4375	0.11875	0.2625	0.4625
229200	0.64375	1	1	0.0125	0.175	0.40625	0.125	0.2875	0.5
229600	0.64375	1	1	0.0125	0.175	0.40625	0.11875	0.2875	0.5
230000	0.64375	1	1	0.0125	0.175	0.45	0.11875	0.2875	0.48125
230400	0.64375	1	1	0.0125	0.175	0.475	0.1375	0.2875	0.5
230800	0.64375	1	1	0.0125	0.1625	0.45625	0.1625	0.2875	0.48125
231200	0.64375	1	1	0.0125	0.1375	0.5125	0.14375	0.3	0.4875
231600	0.64375	1	1	0.0125	0.125	0.4875	0.14375	0.3	0.5125
232000	0.64375	1	1	0.0125	0.1375	0.49375	0.16875	0.3375	0.5625
232400	0.64375	1	1	0.00625	0.125	0.5	0.15	0.3375	0.5875
232800	0.64375	1	1	0.00625	0.1375	0.525	0.15	0.325	0.5875
233200	0.64375	1	1	0.00625	0.15	0.575	0.16875	0.3	0.5625
233600	0.64375	1	1	0.00625	0.125	0.625	0.19375	0.3125	0.60625
234000	0.64375	1	1	0.00625	0.1375	0.6	0.19375	0.3125	0.63125
234400	0.64375	1	1	0.00625	0.125	0.55625	0.175	0.3125	0.625
234800	0.64375	1	1	0.00625	0.125	0.55625	0.15625	0.325	0.65
235200	0.64375	1	1	0.00625	0.125	0.5	0.175	0.3125	0.64375
235600	0.64375	1	1	0.00625	0.1125	0.475	0.15625	0.3125	0.6375
236000	0.625	1	1	0	0.075	0.46875	0.13125	0.3	0.6125
236400	0.625	1	1	0	0.075	0.4875	0.13125	0.3	0.5875
236800	0.625	1	1	0	0.0875	0.48125	0.1125	0.3	0.5625
237200	0.625	1	1	0	0.075	0.48125	0.1125	0.3	0.525
237600	0.64375	1	1	0	0.075	0.46875	0.1125	0.2875	0.5
238000	0.64375	1	1	0.025	0.075	0.46875	0.13125	0.2875	0.49375
238400	0.6625	1	1	0.05	0.1	0.46875	0.15	0.2875	0.45625
238800	0.6625	1	1	0.05625	0.125	0.5125	0.16875	0.275	0.45625
239200	0.6625	1	1	0.05625	0.15	0.55625	0.14375	0.25	0.43125
239600	0.68125	1	1	0.05625	0.15	0.6	0.1625	0.2625	0.44375
240000	0.68125	1	1	0.05625	0.15	0.5875	0.1625	0.2625	0.46875
240400	0.68125	1	1	0.05625	0.1625	0.5875	0.18125	0.2625	0.475
240800	0.68125	1	1	0.05625	0.15	0.59375	0.2	0.2625	0.5125
241200	0.68125	1	1	0.05625	0.1625	0.59375	0.175	0.25	0.53125
241600	0.68125	1	1	0.05625	0.2	0.6	0.15625	0.25	0.55625
242000	0.68125	1	1	0.03125	0.2	0.6	0.15625	0.25	0.55625
242400	0.6625	1	1	0.00625	0.2125	0.65	0.15625	0.25	0.55625
242800	0.68125	1	1	0	0.2	0.6125	0.15625	0.25	0.53125
243200	0.7	1	1	0	0.1875	0.59375	0.18125	0.2625	0.5375
243600	0.7	1	1	0	0.1875	0.61875	0.15625	0.2375	0.5375
244000	0.7	1	1	0	0.225	0.6375	0.15625	0.2125	0.55
244400	0.7	1	1	0	0.2125	0.6125	0.15625	0.225	0.55
244800	0.71875	1	1	0	0.225	0.6375	0.15625	0.225	0.5625
245200	0.71875	1	1	0	0.2375	0.66875	0.18125	0.2375	0.54375
245600	0.7	1	1	0	0.2125	0.66875	0.2	0.2375	0.5625
246000	0.7	1	1	0	0.1875	0.64375	0.2	0.2375	0.5625
246400	0.7	1	1	0	0.1625	0.63125	0.2	0.2375	0.5625
246800	0.68125	1	1	0	0.15	0.64375	0.2	0.2375	0.6
247200	0.68125	1	1	0	0.1375	0.61875	0.2	0.2375	0.6
247600	0.6625	1	1	0	0.1625	0.59375	0.20625	0.2625	0.59375
248000	0.6625	1	1	0	0.1375	0.5875	0.23125	0.275	0.55625
248400	0.6625	1	1	0	0.125	0.64375	0.2125	0.275	0.6
248800	0.64375	1	1	0.00625	0.125	0.6625	0.21875	0.3	0.575
249200	0.64375	1	1	0.03125	0.125	0.60625	0.21875	0.3	0.6
249600	0.64375	1	1	0.0375	0.1375	0.58125	0.2	0.3	0.5625
250000	0.6625	1	1	0.04375	0.1625	0.6125	0.2	0.3	0.58125
250400	0.6625	1	1	0.04375	0.1625	0.59375	0.2	0.3	0.6
250800	0.6625	1	1	0.04375	0.1625	0.59375	0.2	0.325	0.59375
251200	0.64375	1	1	0.05	0.1875	0.6375	0.2	0.325	0.6125
251600	0.64375	1	1	0.05625	0.1875	0.675	0.2	0.3125	0.5875
252000	0.64375	1	1	0.05625	0.175	0.6375	0.18125	0.3125	0.625
252400	0.6625	1	1	0.05625	0.2	0.63125	0.2	0.3	0.575
252800	0.6625	1	1	0.05	0.1875	0.58125	0.16875	0.275	0.56875
253200	0.6625	1	1	0.05	0.1875	0.5875	0.15	0.275	0.54375
253600	0.68125	1	1	0.05	0.1875	0.5875	0.16875	0.275	0.5375
254000	0.6625	1	1	0.04375	0.175	0.6125	0.14375	0.275	0.5
254400	0.6625	1	1	0.04375	0.175	0.61875	0.11875	0.275	0.5
254800	0.6625	1	1	0.04375	0.1625	0.625	0.11875	0.25	0.50625
255200	0.6625	1	1	0.0375	0.1625	0.625	0.11875	0.25	0.51875
255600	0.6625	1	1	0.03125	0.1375	0.60625	0.1375	0.25	0.5
256000	0.6625	1	1	0.03125	0.1625	0.65	0.15625	0.25	0.4625
256400	0.64375	1	1	0.03125	0.15	0.61875	0.15625	0.25	0.50625
256800	0.64375	1	1	0.03125	0.1375	0.6125	0.1875	0.275	0.5625
257200	0.64375	1	1	0.0125	0.1375	0.5875	0.20625	0.275	0.6125
257600	0.64375	1	1	0.00625	0.1125	0.63125	0.20625	0.275	0.6375
258000	0.64375	1	1	0.00625	0.1	0.55625	0.2125	0.275	0.65625
258400	0.64375	1	1	0.00625	0.0875	0.575	0.2125	0.275	0.65625
258800	0.64375	1	1	0.00625	0.0875	0.55625	0.19375	0.275	0.6
259200	0.6625	1	1	0.03125	0.0875	0.5375	0.19375	0.275	0.58125
259600	0.6625	1	1	0.0375	0.125	0.525	0.19375	0.275	0.60625
260000	0.68125	1	1	0.0375	0.1375	0.50625	0.175	0.2875	0.60625
260400	0.68125	1	1	0.0375	0.125	0.5125	0.15625	0.3	0.5875
260800	0.68125	1	1	0.0375	0.15	0.54375	0.15	0.275	0.55625
261200	0.68125	1	1	0.03125	0.175	0.56875	0.15	0.2875	0.53125
261600	0.6625	1	1	0.05625	0.2	0.53125	0.125	0.275	0.525
262000	0.6625	1	1	0.05625	0.225	0.56875	0.11875	0.275	0.56875
262400	0.6625	1	1	0.0625	0.25	0.55	0.14375	0.275	0.55
262800	0.68125	1	1	0.0875	0.275	0.525	0.1625	0.275	0.56875
263200	0.68125	1	1	0.0625	0.2625	0.5375	0.1625	0.275	0.56875
263600	0.7	1	1	0.05625	0.225	0.5125	0.14375	0.275	0.5625
264000	0.68125	1	1	0.05625	0.2125	0.50625	0.1625	0.2625	0.55625
264400	0.68125	1	1	0.05625	0.225	0.50625	0.20625	0.275	0.5625
264800	0.7	1	1	0.0625	0.225	0.4875	0.18125	0.2875	0.54375
265200	0.71875	1	1	0.0625	0.175	0.4875	0.18125	0.275	0.51875
265600	0.71875	1	1	0.0375	0.175	0.4875	0.18125	0.3	0.53125
266000	0.71875	1	1	0.0375	0.15	0.45	0.1875	0.3	0.46875
266400	0.71875	1	1	0.03125	0.125	0.4625	0.1875	0.3	0.49375
266800	0.7	1	1	0.00625	0.1	0.4875	0.1875	0.3	0.54375
267200	0.68125	1	1	0.0125	0.1375	0.475	0.1875	0.3125	0.53125
267600	0.6625	1	1	0.0125	0.15	0.49375	0.20625	0.3125	0.55625
268000	0.68125	1	1	0.0125	0.15	0.5	0.1875	0.3125	0.55625
268400	0.7	1	1	0.0125	0.1625	0.525	0.14375	0.2875	0.525
268800	0.68125	1	1	0.00625	0.1375	0.5125	0.14375	0.2625	0.54375
269200	0.6625	1	1	0.00625	0.1375	0.50625	0.14375	0.2625	0.5625
269600	0.68125	1	1	0.00625	0.125	0.51875	0.16875	0.2625	0.5625
270000	0.68125	1	1	0.00625	0.1375	0.51875	0.1875	0.2875	0.5875
270400	0.7	1	1	0.00625	0.1375	0.5	0.1625	0.2875	0.5625
270800	0.71875	1	1	0.00625	0.15	0.475	0.1625	0.2875	0.51875
271200	0.7375	1	1	0	0.1	0.48125	0.1375	0.275	0.53125
271600	0.7375	1	1	0	0.1	0.5	0.11875	0.2875	0.55625
272000	0.75625	1	1	0	0.125	0.525	0.11875	0.2875	0.59375
272400	0.775	1	1	0	0.1125	0.475	0.11875	0.2875	0.575
272800	0.8125	1	1	0	0.125	0.4625	0.11875	0.2875	0.575
273200	0.85	1	1	0	0.1375	0.46875	0.1	0.2875	0.55625
273600	0.85	1	1	0	0.125	0.45	0.1	0.2875	0.53125
274000	0.86875	1	1	0	0.125	0.46875	0.08125	0.2625	0.50625
274400	0.8875	1	1	0	0.125	0.46875	0.10625	0.2625	0.50625
274800	0.90625	1	1	0	0.1125	0.46875	0.08125	0.2625	0.51875
275200	0.925	1	1	0.025	0.1375	0.48125	0.10625	0.2625	0.5
275600	0.9625	1	1	0.025	0.1375	0.44375	0.125	0.25	0.46875
276000	0.9625	1	1	0.025	0.1125	0.44375	0.11875	0.25	0.45
276400	0.9625	1	1	0.025	0.1	0.4625	0.1125	0.2375	0.46875
276800	0.9625	1	1	0.025	0.1	0.50625	0.1375	0.25	0.49375
277200	0.9625	1	1	0.025	0.1125	0.48125	0.15625	0.25	0.54375
277600	0.98125	1	1	0.025	0.125	0.5	0.1625	0.2625	0.5625
278000	1	1	1	0.025	0.1375	0.50625	0.18125	0.2875	0.625
278400	1	1	1	0.025	0.1625	0.50625	0.18125	0.2875	0.64375
278800	1	1	1	0.025	0.1875	0.53125	0.20625	0.2875	0.65
279200	1	1	1	0	0.1875	0.525	0.1875	0.2875	0.675
279600	1	1	1	0.00625	0.2	0.5625	0.1875	0.2875	0.6625
280000	1	1	1	0.00625	0.175	0.55	0.19375	0.2875	0.66875
280400	1	1	1	0.00625	0.1875	0.5375	0.2	0.3125	0.675
280800	1	1	1	0.00625	0.1875	0.49375	0.2	0.3125	0.63125
281200	1	1	1	0.00625	0.1875	0.51875	0.18125	0.3125	0.63125
281600	1	1	1	0.00625	0.1875	0.48125	0.175	0.2875	0.5875
282000	1	1	1	0.00625	0.1625	0.475	0.15	0.25	0.54375
282400	1	1	1	0.00625	0.1375	0.48125	0.15	0.25	0.56875
282800	1	1	1	0.0125	0.1375	0.475	0.15	0.2625	0.55
283200	1	1	1	0.0125	0.1125	0.5125	0.16875	0.2875	0.56875
283600	1	1	1	0.00625	0.1	0.475	0.14375	0.275	0.54375
284000	1	1	1	0.0125	0.125	0.4625	0.14375	0.2875	0.55
284400	1	1	1	0.0125	0.1375	0.4875	0.1625	0.3	0.575
284800	1	1	1	0.0125	0.1625	0.5125	0.16875	0.325	0.59375
285200	1	1	1	0.0125	0.1625	0.5125	0.1875	0.3375	0.56875
285600	0.98125	1	1	0.0125	0.1625	0.5125	0.1875	0.3375	0.56875
286000	0.98125	1	1	0.01875	0.1875	0.55	0.2125	0.375	0.6
286400	0.98125	1	1	0.01875	0.1875	0.51875	0.2125	0.375	0.575
286800	0.98125	1	1	0.0125	0.175	0.525	0.19375	0.3625	0.575
287200	0.98125	1	1	0.0125	0.2	0.475	0.19375	0.3375	0.55625
287600	0.98125	1	1	0.0125	0.1875	0.49375	0.21875	0.35	0.575
288000	0.98125	1	1	0.03125	0.1875	0.4875	0.24375	0.3625	0.575
288400	0.98125	1	1	0.05625	0.1875	0.475	0.24375	0.3375	0.525
288800	0.98125	1	1	0.05625	0.15	0.46875	0.24375	0.3375	0.525
289200	0.98125	1	1	0.05625	0.125	0.46875	0.24375	0.325	0.54375
289600	1	1	1	0.05625	0.1125	0.5	0.24375	0.325	0.5875
290000	1	1	1	0.05	0.1	0.44375	0.24375	0.3	0.5375
290400	1	1	1	0.05625	0.15	0.475	0.24375	0.3125	0.58125
290800	1	1	1	0.0625	0.1875	0.5	0.2625	0.3125	0.6
291200	1	1	1	0.06875	0.1875	0.475	0.2625	0.3125	0.6
291600	1	1	1	0.06875	0.2125	0.475	0.2625	0.3125	0.6
292000	1	1	1	0.04375	0.2	0.49375	0.25625	0.2875	0.59375
292400	1	1	1	0.01875	0.2	0.45625	0.25625	0.2875	0.6375
292800	1	1	1	0.01875	0.2	0.46875	0.25	0.2625	0.63125
293200	1	1	1	0.025	0.225	0.4625	0.225	0.2625	0.63125
293600	1	1	1	0.05	0.2625	0.5	0.2	0.2625	0.64375
294000	1	1	1	0.05	0.275	0.51875	0.175	0.2625	0.66875
294400	1	1	1	0.04375	0.25	0.51875	0.18125	0.275	0.65
294800	1	1	1	0.0375	0.2125	0.4875	0.1625	0.275	0.65625
295200	1	1	1	0.03125	0.2125	0.53125	0.1625	0.275	0.6125
295600	1	1	1	0.03125	0.2	0.5125	0.1625	0.275	0.6375
296000	1	1	1	0.03125	0.2125	0.5	0.1625	0.275	0.63125
296400	1	1	1	0.03125	0.2375	0.525	0.14375	0.275	0.6125
296800	1	1	1	0.03125	0.2375	0.5125	0.14375	0.2875	0.6
297200	1	1	1	0.025	0.25	0.5375	0.175	0.3125	0.60625
297600	1	1	1	0	0.2375	0.49375	0.2	0.3125	0.6
298000	1	1	1	0	0.225	0.51875	0.225	0.3125	0.6
298400	1	1	1	0	0.2125	0.5125	0.19375	0.2625	0.6
298800	1	1	1	0	0.2	0.5375	0.2125	0.2625	0.61875
299200	1	1	1	0.00625	0.2125	0.55625	0.19375	0.2625	0.6375
299600	1	1	1	0.00625	0.2	0.575	0.19375	0.2625	0.61875
300000	1	1	1	0.00625	0.1875	0.56875	0.19375	0.2625	0.60625
300400	1	1	1	0.0125	0.1625	0.5625	0.1875	0.2625	0.60625
300800	1	1	1	0.0125	0.175	0.54375	0.16875	0.25	0.61875
301200	1	1	1	0.01875	0.1625	0.54375	0.1375	0.225	0.6125
301600	1	1	1	0.04375	0.1625	0.56875	0.1375	0.2375	0.5875
302000	1	1	1	0.06875	0.175	0.54375	0.1375	0.2375	0.5625
302400	1	1	1	0.06875	0.2	0.575	0.1375	0.275	0.54375
302800	1	1	1	0.06875	0.225	0.55625	0.11875	0.275	0.475
303200	1	1	1	0.0625	0.1875	0.53125	0.11875	0.2875	0.50625
303600	1	1	1	0.0625	0.1875	0.50625	0.09375	0.2875	0.48125
304000	1	1	1	0.0625	0.1875	0.50625	0.06875	0.275	0.50625
304400	1	1	1	0.05625	0.175	0.5625	0.09375	0.2875	0.525
304800	1	1	1	0.05625	0.175	0.58125	0.1125	0.3	0.53125
305200	1	1	1	0.05	0.15	0.5375	0.1125	0.3	0.5125
305600	1	1	1	0.025	0.1375	0.4875	0.1125	0.2875	0.50625
306000	1	1	1	0	0.1125	0.48125	0.0875	0.3125	0.56875
306400	1	1	1	0	0.075	0.45	0.1125	0.3	0.5625
306800	1	1	1	0.00625	0.075	0.48125	0.10625	0.3	0.5875
307200	1	1	1	0.03125	0.1	0.46875	0.125	0.2875	0.58125
307600	1	1	1	0.03125	0.1	0.5	0.13125	0.2875	0.58125
308000	1	1	1	0.03125	0.0875	0.48125	0.1375	0.3	0.6
308400	1	1	1	0.03125	0.075	0.4375	0.1375	0.3	0.58125
308800	1	1	1	0.0375	0.0875	0.44375	0.1375	0.2875	0.5625
309200	1	1	1	0.0375	0.1125	0.4625	0.1625	0.2875	0.5375
309600	1	1	1	0.0375	0.125	0.4625	0.1625	0.2875	0.575
310000	1	1	1	0.0375	0.1625	0.49375	0.16875	0.2625	0.53125
310400	1	1	1	0.0375	0.175	0.51875	0.15	0.2625	0.56875
310800	1	1	1	0.03125	0.1625	0.525	0.175	0.2625	0.5875
311200	1	1	1	0.00625	0.1375	0.51875	0.18125	0.2875	0.6125
311600	1	1	1	0.00625	0.1375	0.51875	0.175	0.2875	0.6375
312000	1	1	1	0.0125	0.175	0.5875	0.19375	0.2875	0.5875
312400	1	1	1	0.0125	0.2	0.59375	0.175	0.2875	0.6125
312800	1	1	1	0.00625	0.2125	0.6375	0.175	0.2875	0.63125
313200	1	1	1	0.00625	0.1875	0.59375	0.175	0.2875	0.65625
313600	1	1	1	0.0125	0.1875	0.6125	0.15	0.2875	0.6375
314000	1	1	1	0.0125	0.1625	0.59375	0.16875	0.2875	0.61875
314400	1	1	1	0.0125	0.175	0.56875	0.1875	0.2875	0.6
314800	1	1	1	0.0125	0.175	0.525	0.1625	0.2875	0.58125
315200	1	1	1	0.01875	0.2	0.55625	0.15625	0.2625	0.5375
315600	1	1	1	0.025	0.225	0.55625	0.15625	0.2625	0.5125
316000	1	1	1	0.025	0.225	0.53125	0.15625	0.2625	0.51875
316400	1	1	1	0.025	0.2	0.4875	0.15	0.2625	0.49375
316800	1	1	1	0.03125	0.1875	0.4375	0.15	0.275	0.49375
317200	1	1	1	0.03125	0.2125	0.50625	0.15	0.275	0.4875
317600	1	1	1	0.025	0.2125	0.53125	0.15625	0.275	0.46875
318000	1	1	1	0.03125	0.225	0.53125	0.13125	0.275	0.4875
318400	1	1	1	0.03125	0.2	0.55625	0.13125	0.275	0.46875
318800	1	1	1	0.03125	0.1875	0.58125	0.15625	0.3	0.49375
319200	1	1	1	0.025	0.1875	0.56875	0.15625	0.3	0.46875
319600	1	1	1	0.01875	0.1625	0.58125	0.1625	0.3	0.5125
320000	1	1	1	0.0125	0.125	0.5375	0.1625	0.3	0.53125
320400	1	1	1	0.0125	0.15	0.5875	0.1875	0.2875	0.53125
320800	1	1	1	0.00625	0.1625	0.59375	0.1625	0.275	0.525
321200	1	1	1	0.00625	0.1625	0.55	0.1625	0.275	0.50625
321600	1	1	1	0.0125	0.1625	0.525	0.18125	0.2875	0.5125
322000	1	1	1	0.00625	0.15	0.5	0.20625	0.2875	0.5125
322400	1	1	1	0.00625	0.1875	0.5	0.20625	0.2875	0.5125
322800	1	1	1	0.03125	0.2125	0.475	0.20625	0.3	0.5375
323200	1	1	1	0.03125	0.1875	0.45625	0.20625	0.3	0.575
323600	1	1	1	0.03125	0.1875	0.4125	0.20625	0.3	0.575
324000	1	1	1	0.03125	0.1875	0.43125	0.20625	0.3	0.60625
324400	1	1	1	0.03125	0.1875	0.4125	0.20625	0.3	0.63125
324800	1	1	1	0.03125	0.175	0.40625	0.2125	0.3	0.59375
325200	1	1	1	0.03125	0.2	0.45625	0.19375	0.3	0.6125
325600	1	1	1	0.025	0.175	0.43125	0.19375	0.3	0.6125
326000	1	1	1	0.025	0.175	0.45	0.16875	0.3	0.59375
326400	1	1	1	0.025	0.1375	0.425	0.16875	0.3	0.59375
326800	1	1	1	0	0.1375	0.45	0.16875	0.275	0.5875
327200	1	1	1	0	0.1375	0.45	0.16875	0.275	0.59375
327600	1	1	1	0	0.175	0.48125	0.1875	0.275	0.55
328000	1	1	1	0	0.175	0.48125	0.1875	0.275	0.49375
328400	1	1	1	0.00625	0.2	0.50625	0.1625	0.275	0.44375
328800	1	1	1	0.00625	0.1875	0.5125	0.1625	0.275	0.49375
329200	1	1	1	0.00625	0.1375	0.475	0.18125	0.275	0.5
329600	1	1	1	0.00625	0.1625	0.525	0.15625	0.2625	0.5125
330000	1	1	1	0.0125	0.175	0.525	0.1625	0.275	0.55625
330400	1	1	1	0.0125	0.2125	0.55625	0.1625	0.275	0.5375
330800	1	1	1	0.0125	0.2125	0.53125	0.1625	0.2625	0.53125
331200	1	1	1	0.0125	0.2375	0.55	0.14375	0.2625	0.525
331600	1	1	1	0.0125	0.225	0.55	0.14375	0.2875	0.575
332000	1	1	1	0.0125	0.225	0.54375	0.11875	0.3	0.58125
332400	1	1	1	0.00625	0.2125	0.54375	0.11875	0.3	0.63125
332800	1	1	1	0.00625	0.2	0.5375	0.1125	0.2875	0.61875
333200	1	1	1	0.00625	0.25	0.59375	0.1125	0.2875	0.6625
333600	1	1	1	0.03125	0.275	0.575	0.1125	0.2625	0.6625
334000	1	1	1	0.05	0.275	0.575	0.13125	0.25	0.6625
334400	1	1	1	0.05	0.25	0.55	0.13125	0.25	0.73125
334800	1	1	1	0.05625	0.25	0.575	0.13125	0.25	0.70625
335200	1	1	1	0.05625	0.25	0.575	0.125	0.25	0.71875
335600	1	1	1	0.05625	0.225	0.58125	0.125	0.225	0.7125
336000	1	1	1	0.0625	0.25	0.59375	0.15	0.2125	0.725
336400	1	1	1	0.0625	0.2125	0.5875	0.15	0.2125	0.71875
336800	1	1	1	0.0625	0.2375	0.59375	0.175	0.225	0.71875
337200	1	1	1	0.0625	0.1875	0.58125	0.175	0.225	0.65
337600	1	1	1	0.0375	0.15	0.55625	0.18125	0.25	0.65625
338000	1	1	1	0.0125	0.125	0.55	0.1625	0.275	0.65625
338400	1	1	1	0.01875	0.1375	0.54375	0.1375	0.275	0.6125
338800	1	1	1	0.0125	0.1125	0.49375	0.11875	0.275	0.6125
339200	1	1	1	0.0125	0.0875	0.45	0.14375	0.275	0.6125
339600	1	1	1	0.0125	0.1125	0.44375	0.14375	0.275	0.5875
340000	1	1	1	0.00625	0.1125	0.4625	0.125	0.275	0.56875
340400	1	1	1	0.00625	0.1375	0.45625	0.15	0.275	0.58125
340800	1	1	1	0.00625	0.1125	0.4625	0.15	0.275	0.5625
341200	1	1	1	0.03125	0.1375	0.40625	0.13125	0.275	0.58125
341600	1	1	1	0.03125	0.125	0.4	0.13125	0.275	0.575
342000	1	1	1	0.0375	0.15	0.45625	0.125	0.225	0.5875
342400	1	1	1	0.03125	0.15	0.48125	0.125	0.2375	0.60625
342800	1	1	1	0.03125	0.15	0.50625	0.11875	0.2375	0.6125
343200	1	1	1	0.05625	0.175	0.53125	0.1	0.2375	0.58125
343600	1	1	1	0.05625	0.1625	0.50625	0.1	0.2375	0.58125
344000	1	1	1	0.05625	0.15	0.4875	0.1	0.2375	0.63125
344400	1	1	1	0.05625	0.15	0.4875	0.1	0.2375	0.59375
344800	1	1	1	0.05625	0.15	0.475	0.1	0.2375	0.575
345200	1	1	1	0.03125	0.15	0.51875	0.11875	0.2375	0.60625
345600	1	1	1	0.03125	0.1625	0.56875	0.1125	0.2375	0.5875
346000	1	1	1	0.025	0.1375	0.54375	0.1375	0.275	0.55625
346400	1	1	1	0.025	0.125	0.575	0.1625	0.2625	0.55
346800	1	1	1	0.025	0.1625	0.6	0.1875	0.2625	0.54375
347200	1	1	1	0	0.15	0.6	0.20625	0.275	0.5875
347600	1	1	1	0	0.15	0.61875	0.20625	0.275	0.5875
348000	1	1	1	0.00625	0.1625	0.6125	0.225	0.275	0.51875
348400	1	1	1	0.00625	0.1625	0.6375	0.225	0.275	0.54375
348800	1	1	1	0.0125	0.2	0.6625	0.225	0.275	0.54375
349200	1	1	1	0.0125	0.175	0.6125	0.20625	0.2875	0.55625
349600	1	1	1	0.0125	0.175	0.56875	0.23125	0.2875	0.55625
350000	1	1	1	0.0125	0.2	0.55	0.23125	0.275	0.55625
350400	1	1	1	0.0125	0.1875	0.5125	0.2125	0.2875	0.54375
350800	1	1	1	0.0125	0.15	0.48125	0.2125	0.2875	0.525
351200	1	1	1	0.0125	0.1375	0.4625	0.1875	0.3	0.50625
351600	1	1	1	0.0125	0.15	0.4875	0.1875	0.3	0.50625
352000	1	1	1	0.00625	0.1375	0.525	0.1875	0.3	0.53125
352400	1	1	1	0.00625	0.125	0.50625	0.1875	0.3	0.525
352800	1	1	1	0	0.0875	0.4375	0.1875	0.3	0.55
353200	1	1	1	0	0.0875	0.45625	0.20625	0.2875	0.50625
353600	1	1	1	0	0.0875	0.48125	0.20625	0.2875	0.50625
354000	1	1	1	0	0.0625	0.5	0.1875	0.2875	0.50625
354400	1	1	1	0	0.0625	0.4375	0.20625	0.2875	0.50625
354800	1	1	1	0	0.075	0.4625	0.20625	0.2875	0.5125
355200	1	1	1	0	0.1	0.4875	0.20625	0.25	0.5125
355600	1	1	1	0.00625	0.1125	0.46875	0.18125	0.225	0.50625
356000	1	1	1	0.00625	0.1	0.45	0.1625	0.25	0.525
356400	1	1	1	0.00625	0.0875	0.425	0.14375	0.25	0.53125
356800	1	1	1	0.00625	0.1	0.475	0.14375	0.2625	0.575
357200	1	1	1	0.00625	0.125	0.4875	0.14375	0.2875	0.625
357600	1	1	1	0.00625	0.1375	0.4625	0.125	0.3	0.65625
358000	1	1	1	0.0125	0.175	0.46875	0.14375	0.325	0.65625
358400	1	1	1	0.0125	0.1875	0.49375	0.14375	0.325	0.65625
358800	1	1	1	0.0125	0.2	0.49375	0.14375	0.325	0.65
359200	1	1	1	0.0125	0.1875	0.5125	0.16875	0.35	0.63125
359600	1	1	1	0.00625	0.1875	0.5375	0.19375	0.375	0.64375
360000	1	1	1	0.00625	0.1875	0.51875	0.2125	0.35	0.61875
360400	1	1	1	0.0125	0.2125	0.51875	0.23125	0.35	0.6
360800	1	1	1	0.0125	0.225	0.54375	0.20625	0.3375	0.55
361200	1	1	1	0.01875	0.225	0.5625	0.20625	0.3125	0.51875
361600	1	1	1	0.01875	0.2	0.575	0.2	0.3125	0.53125
362000	1	1	1	0.0125	0.1875	0.56875	0.175	0.2875	0.54375
362400	1	1	1	0.0375	0.225	0.6125	0.15625	0.275	0.5625
362800	1	1	1	0.0375	0.2	0.59375	0.1375	0.275	0.54375
363200	1	1	1	0.0375	0.1875	0.55	0.1125	0.2875	0.5875
363600	1	1	1	0.0625	0.175	0.5	0.1125	0.2875	0.6125
364000	1	1	1	0.0625	0.1875	0.50625	0.09375	0.3	0.6375
364400	1	1	1	0.05625	0.1625	0.50625	0.09375	0.325	0.65625
364800	1	1	1	0.05625	0.15	0.475	0.11875	0.3375	0.6875
365200	1	1	1	0.05	0.15	0.45625	0.09375	0.3375	0.6875
365600	1	1	1	0.05625	0.175	0.44375	0.1	0.325	0.64375
366000	1	1	1	0.05625	0.1625	0.45	0.125	0.325	0.66875
366400	1	1	1	0.03125	0.125	0.46875	0.125	0.3375	0.65
366800	1	1	1	0.03125	0.15	0.4875	0.11875	0.325	0.675
367200	1	1	1	0.03125	0.1875	0.53125	0.14375	0.3125	0.65
367600	1	1	1	0.00625	0.1875	0.53125	0.14375	0.3125	0.61875
368000	1	1	1	0.00625	0.175	0.5	0.1375	0.3125	0.625
368400	1	1	1	0.00625	0.2	0.51875	0.1375	0.2875	0.58125
368800	1	1	1	0.03125	0.2125	0.51875	0.1125	0.2625	0.58125
369200	1	1	1	0.03125	0.1875	0.5375	0.11875	0.2625	0.56875
369600	1	1	1	0.025	0.1625	0.53125	0.11875	0.2625	0.5875
370000	1	1	1	0.03125	0.1875	0.54375	0.11875	0.2625	0.59375
370400	1	1	1	0.03125	0.175	0.475	0.1375	0.25	0.5875
370800	1	1	1	0.03125	0.15	0.43125	0.1625	0.2625	0.60625
371200	1	1	1	0.03125	0.15	0.45	0.14375	0.25	0.58125
371600	1	1	1	0.03125	0.1625	0.49375	0.14375	0.25	0.5875
372000	1	1	1	0.03125	0.1875	0.5	0.16875	0.2375	0.575
372400	1	1	1	0.03125	0.1625	0.5	0.16875	0.2375	0.61875
372800	1	1	1	0.00625	0.1625	0.5	0.19375	0.25	0.5875
373200	1	1	1	0.00625	0.175	0.48125	0.2125	0.25	0.58125
373600	1	1	1	0.00625	0.1875	0.50625	0.23125	0.25	0.60625
374000	1	1	1	0	0.175	0.48125	0.20625	0.2625	0.58125
374400	1	1	1	0	0.175	0.48125	0.20625	0.2625	0.6
374800	1	1	1	0	0.1875	0.55	0.1875	0.275	0.58125
375200	1	1	1	0	0.175	0.50625	0.20625	0.275	0.58125
375600	1	1	1	0	0.1625	0.48125	0.20625	0.275	0.58125
376000	1	1	1	0	0.1625	0.50625	0.20625	0.275	0.5875
376400	1	1	1	0.025	0.1875	0.51875	0.18125	0.2875	0.59375
376800	1	1	1	0.025	0.1625	0.525	0.18125	0.3	0.61875
377200	1	1	1	0.025	0.15	0.54375	0.1625	0.3	0.6
377600	1	1	1	0.03125	0.1625	0.525	0.1375	0.3	0.58125
378000	1	1	1	0.03125	0.15	0.50625	0.1625	0.2875	0.58125
378400	1	1	1	0.03125	0.15	0.525	0.1625	0.2875	0.5625
378800	1	1	1	0.03125	0.15	0.5125	0.18125	0.275	0.55625
379200	1	1	1	0.03125	0.1375	0.55625	0.18125	0.275	0.58125
379600	1	1	1	0.03125	0.15	0.6	0.18125	0.275	0.59375
380000	1	1	1	0.03125	0.15	0.6125	0.18125	0.275	0.5875
380400	1	1	1	0.00625	0.15	0.60625	0.1875	0.275	0.5625
380800	1	1	1	0.00625	0.15	0.58125	0.1875	0.275	0.5625
381200	1	1	1	0.0125	0.175	0.575	0.20625	0.2875	0.60625
381600	1	1	1	0.00625	0.1625	0.6	0.2125	0.2875	0.60625
382000	1	1	1	0.00625	0.1625	0.64375	0.2125	0.3125	0.5875
382400	1	1	1	0.00625	0.1625	0.64375	0.2125	0.3125	0.5875
382800	1	1	1	0.00625	0.1875	0.61875	0.19375	0.3125	0.59375
383200	1	1	1	0.00625	0.175	0.5875	0.175	0.325	0.6125
383600	1	1	1	0.00625	0.1375	0.5375	0.175	0.325	0.6125
384000	1	1	1	0.00625	0.125	0.54375	0.175	0.325	0.59375
384400	1	1	1	0.0125	0.125	0.5	0.19375	0.3125	0.56875
384800	1	1	1	0.0125	0.125	0.525	0.16875	0.3	0.58125
385200	1	1	1	0.00625	0.1	0.5125	0.15	0.2875	0.55625
385600	1	1	1	0.00625	0.0875	0.5	0.15	0.2875	0.55
386000	1	1	1	0.00625	0.075	0.46875	0.15	0.2625	0.5625
386400	1	1	1	0.00625	0.1	0.48125	0.13125	0.2625	0.58125
386800	1	1	1	0.00625	0.1	0.48125	0.15	0.2625	0.58125
387200	1	1	1	0.00625	0.1	0.46875	0.16875	0.25	0.5625
387600	1	1	1	0.00625	0.125	0.475	0.16875	0.25	0.54375
388000	1	1	1	0.00625	0.1375	0.43125	0.16875	0.25	0.54375
388400	1	1	1	0	0.125	0.46875	0.16875	0.25	0.5875
388800	1	1	1	0	0.15	0.48125	0.19375	0.25	0.53125
389200	1	1	1	0	0.1625	0.49375	0.2125	0.25	0.5125
389600	1	1	1	0	0.1625	0.5125	0.23125	0.25	0.5375
390000	1	1	1	0	0.175	0.50625	0.20625	0.2375	0.55
390400	1	1	1	0.00625	0.175	0.525	0.225	0.2375	0.55
390800	1	1	1	0.0125	0.1625	0.525	0.225	0.2375	0.525
391200	1	1	1	0.0125	0.1625	0.56875	0.20625	0.2375	0.48125
391600	1	1	1	0.0125	0.1625	0.55	0.1875	0.2375	0.4875
392000	1	1	1	0.0125	0.1625	0.575	0.16875	0.2375	0.525
392400	1	1	1	0.0125	0.1625	0.5875	0.16875	0.2375	0.525
392800	1	1	1	0.0125	0.15	0.6	0.16875	0.2375	0.525
393200	1	1	1	0.0125	0.1375	0.575	0.16875	0.2375	0.55
393600	1	1	1	0.0125	0.1625	0.54375	0.16875	0.2375	0.4875
394000	1	1	1	0.01875	0.1875	0.5875	0.19375	0.25	0.48125
394400	1	1	1	0.01875	0.2	0.56875	0.175	0.25	0.48125
394800	1	1	1	0.0125	0.175	0.59375	0.175	0.25	0.525
395200	1	1	1	0.0125	0.1875	0.55	0.175	0.25	0.55
395600	1	1	1	0.0125	0.1625	0.6	0.19375	0.2625	0.59375
396000	1	1	1	0.0125	0.1625	0.59375	0.2125	0.275	0.5625
396400	1	1	1	0.0125	0.175	0.58125	0.2125	0.275	0.54375
396800	1	1	1	0.0125	0.175	0.55625	0.1875	0.2625	0.56875
397200	1	1	1	0.0125	0.2	0.5625	0.1625	0.2625	0.5625
397600	1	1	1	0.0125	0.1875	0.60625	0.14375	0.2625	0.5875
398000	1	1	1	0.00625	0.15	0.58125	0.125	0.2625	0.5625
398400	1	1	1	0	0.125	0.575	0.14375	0.2625	0.575
398800	1	1	1	0	0.15	0.575	0.14375	0.2625	0.55
399200	1	1	1	0.00625	0.1625	0.58125	0.1625	0.2625	0.56875
399600	1	1	1	0.00625	0.1625	0.55	0.1625	0.25	0.5625
400000	1	1	1	0.00625	0.1625	0.53125	0.1375	0.225	0.5625
