# Supplementary material
Source: ML conference proceedings conference paper supplement (https://openreview.net/forum?id=Lb8ZnWW_In6)
Supplement: supplementary_material [file craft_t1.xlsx]

## Sheet: aqrm
0	0	0	0	0	0	0	0	0	0
0	0	0	0	0	0	0	0	0	0
0	0	0	0	0	0	0	0	0	0
0	0	0	0	0	0	0	0	1	0
0	0	0	0	0	0	0	0	0	0
0	0	0	0	0	0	0	0	0	0
0	0	0	0	0	0	0	0	0	0
0	0	0	0	0	0	0	0	0	0
0	0	0	0	0	0	0	0	0	0
0	0	0	0	0	0	0	0	0	0
0	0	0	0	0	0	0	0	0	0
0	0	0	0	0	0	0	0	0	0
0	0	0	0	0	0	0	0	0	0
0	0	0	0	0	0	0	0	0	0
0	0	0	0	0	0	0	0	0	0
1	0	0	0	0	0	0	0	0	0
0	0	0	0	0	0	0	0	0	0
0	0	0	0	0	0	0	0	0	0
0	0	0	0	0	0	0	0	0	0
0	0	0	0	0	0	0	0	0	0
0	0	0	0	0	0	0	0	0	0
0	0	0	0	0	0	0	0	0	0
0	0	0	0	0	0	0	0	0	0
0	0	0	0	0	0	0	0	0	0
0	0	0	0	0	0	0	0	0	0
0	0	0	0	0	0	0	0	0	0
0	0	0	0	0	0	0	0	0	0
0	0	0	0	0	0	0	0	0	0
0	0	0	0	0	0	0	0	0	0
0	0	0	0	0	0	0	0	0	0
0	0	0	0	0	0	0	0	0	0
0	0	0	0	0	0	0	0	0	0
0	0	0	0	0	0	0	0	0	0
0	0	0	0	0	0	0	0	0	0
0	0	0	0	0	0	0	0	0	0
0	0	0	0	0	0	0	0	0	0
0	0	0	0	0	0	0	0	0	0
0	0	0	0	0	0	0	0	0	0
0	0	0	0	0	0	0	0	0	0
0	0	0	0	0	0	0	0	0	0
0	0	0	0	0	0	0	0	0	0
0	0	0	0	0	0	0	0	0	0
0	0	0	0	0	0	0	0	0	0
0	0	0	0	0	0	0	0	0	0
0	0	0	0	0	0	0	0	0	0
0	0	0	0	0	0	0	0	0	0
0	0	0	0	0	0	0	0	0	0
0	0	0	0	0	0	0	0	0	0
0	0	0	0	0	0	0	0	0	0
0	0	0	0	0	0	0	0	0	0
0	0	0	0	0	0	0	0	0	0
0	0	0	0	0	0	0	0	0	0
0	0	0	0	0	0	0	0	0	0
0	0	0	0	0	0	0	0	0	0
0	0	0	0	0	0	0	0	0	0
0	0	0	0	0	0	0	0	0	0
0	0	0	0	0	0	0	0	0	0
0	0	0	0	0	0	0	0	0	0
0	0	0	0	0	0	0	0	0	0
0	0	0	0	0	0	0	0	0	0
0	0	0	0	0	0	0	0	0	0
0	0	0	0	0	0	0	0	0	0
0	0	0	0	0	0	0	0	0	0
0	0	0	0	0	0	0	0	0	0
0	0	0	0	0	0	0	0	0	0
0	0	0	0	0	0	0	0	0	0
0	0	0	0	0	0	0	0	0	0
0	0	0	0	0	0	0	0	0	1
0	0	0	0	0	0	0	0	0	0
0	0	0	0	0	0	0	0	0	0
0	0	0	0	0	0	0	0	0	0
0	0	0	0	0	0	0	0	0	0
0	0	0	0	0	0	0	0	0	0
0	0	0	0	0	0	0	0	0	0
0	1	0	0	0	0	0	0	0	0
0	0	0	0	0	0	0	0	0	0
0	0	0	0	0	0	0	0	0	0
0	0	0	0	0	0	0	0	0	0
0	1	0	0	0	0	0	0	0	0
0	0	0	0	0	0	0	0	0	0
0	0	0	0	0	0	0	0	0	0
0	0	1	0	0	0	0	0	0	0
0	0	0	0	0	0	0	0	0	0
0	0	0	0	0	0	0	0	0	0
0	0	0	0	0	0	0	0	0	0
0	0	0	0	0	0	0	0	0	0
0	0	0	0	0	0	0	0	0	0
0	0	0	0	0	0	0	0	0	0
0	0	0	0	0	0	1	0	1	0
0	0	0	0	0	0	0	0	0	0
0	0	0	0	0	0	0	0	0	0
0	0	0	0	0	0	1	0	0	0
0	0	0	0	0	0	0	0	0	0
0	0	0	0	0	0	1	0	0	0
0	0	0	1	0	0	0	0	0	0
0	0	0	0	0	0	0	0	0	0
0	0	0	0	0	0	1	0	0	1
0	0	0	0	0	0	0	0	0	1
0	0	0	0	0	0	1	0	0	0
0	0	0	0	0	0	0	0	0	0
0	0	0	0	0	0	0	0	0	0
0	1	0	0	0	0	0	0	0	1
0	0	0	0	0	0	0	0	0	0
0	0	0	0	0	0	1	0	0	0
0	0	0	1	1	0	1	0	0	0
0	0	0	0	1	0	1	0	0	0
0	0	0	1	1	0	1	0	0	0
0	0	0	0	0	0	0	0	0	0
0	0	0	0	0	0	1	0	0	0
0	0	0	0	0	0	1	0	1	0
0	0	0	0	0	0	1	0	0	0
0	0	0	0	0	0	1	0	0	0
0	0	0	0	1	0	1	0	0	0
1	0	0	0	0	0	1	0	0	1
0	0	0	0	0	0	0	0	0	0
0	0	0	0	0	0	1	0	0	0
0	0	0	0	1	0	1	0	0	0
0	0	0	0	1	0	1	0	0	0
0	1	1	0	0	0	1	0	0	0
0	1	0	0	1	0	1	0	0	0
0	0	0	0	0	0	1	0	0	0
0	0	0	0	0	0	1	0	0	0
1	0	0	0	0	0	1	0	0	0
0	0	0	0	0	0	1	0	0	0
0	0	0	0	1	0	1	0	1	0
0	0	0	0	1	1	1	1	0	0
0	0	0	0	1	0	1	0	0	0
0	0	0	0	0	0	0	1	1	0
0	0	0	0	0	0	1	0	0	0
1	0	0	0	1	0	1	0	0	0
1	0	0	0	1	0	1	0	0	0
0	0	0	0	1	0	1	0	0	0
1	0	0	0	1	0	1	0	1	0
0	0	0	0	0	0	1	0	0	0
0	0	0	0	0	0	1	0	0	0
1	0	0	0	1	0	1	0	0	0
0	0	0	0	1	0	0	0	0	0
0	0	1	0	1	0	1	0	0	0
1	0	0	0	0	0	1	0	1	0
1	0	0	0	1	0	1	0	1	0
1	0	0	0	1	0	1	0	1	0
1	0	0	0	1	0	1	0	1	0
1	0	0	0	1	0	1	0	1	0
1	0	0	0	1	0	1	0	1	0
1	0	0	0	1	0	1	0	0	1
1	0	0	0	1	0	1	0	0	0
1	0	0	0	1	0	1	0	0	0
0	0	1	0	1	0	1	0	1	1
1	0	0	0	1	0	1	0	1	1
1	0	1	0	1	0	1	0	0	1
1	0	1	0	1	0	1	0	1	0
1	0	1	0	1	0	1	0	0	1
1	0	1	0	1	0	1	0	0	0
1	0	0	0	1	0	1	0	1	0
1	0	0	0	1	0	1	0	1	0
1	0	0	0	1	0	1	0	1	0
1	0	0	0	1	0	1	0	1	0
1	0	0	0	1	0	1	1	1	1
1	0	0	0	1	0	1	0	1	1
1	0	0	0	1	0	1	0	1	1
1	0	0	0	1	0	1	0	1	0
1	0	0	0	1	0	0	0	0	0
1	0	0	0	1	0	1	0	1	1
1	0	0	0	1	0	1	0	1	1
1	0	0	0	1	0	1	0	1	1
1	0	0	0	1	0	1	0	1	1
1	0	0	0	1	0	1	1	1	1
1	0	0	0	1	0	1	1	0	1
1	0	0	1	0	0	1	1	1	1
1	0	0	0	1	0	1	1	1	1
1	0	1	0	1	0	1	0	1	1
1	0	0	0	1	0	1	0	1	1
1	0	0	0	1	0	1	1	1	1
1	0	0	0	1	0	1	0	1	1
1	0	0	0	1	0	1	1	1	1
1	1	1	0	1	0	1	1	1	1
1	0	0	0	1	0	1	0	1	1
1	1	0	0	1	0	1	1	1	1
1	0	1	0	1	0	1	0	1	1
1	1	1	0	1	0	1	1	1	1
1	1	0	1	1	0	1	1	1	1
1	0	0	0	1	0	1	0	1	1
1	0	0	0	1	0	1	1	1	1
1	0	1	1	1	0	1	1	1	1
1	0	1	1	1	0	1	1	1	1
1	0	1	0	1	0	1	1	1	1
0	0	0	0	1	1	0	1	1	1
1	1	1	0	1	0	1	1	1	1
1	1	1	0	1	0	1	1	1	1
1	1	0	0	1	0	1	1	1	1
1	1	1	0	1	0	1	1	1	1
1	1	1	0	1	0	1	1	1	1
1	0	1	0	1	0	1	1	0	1
1	1	0	1	1	0	1	1	0	1
1	1	0	1	1	0	1	1	1	1
1	1	1	0	1	0	1	1	0	1
1	0	0	1	1	0	1	1	1	1
1	0	0	0	1	1	1	1	1	1
1	1	1	0	1	1	1	1	1	1
1	1	1	1	1	1	1	1	1	1
1	1	1	0	1	0	1	1	1	1
1	1	0	0	1	0	1	1	1	1
1	1	1	0	1	0	0	1	1	0
1	1	0	1	1	0	1	1	1	1
1	1	0	1	1	0	1	1	1	1
1	1	1	1	1	0	1	1	1	1
1	1	1	1	1	0	1	1	1	1
1	1	1	1	1	0	1	0	1	1
1	1	1	1	1	1	1	1	1	1
1	1	1	1	1	0	1	1	1	1
1	1	1	1	1	0	1	1	1	1
1	1	1	1	1	0	1	1	1	1
1	1	1	1	1	0	1	1	1	1
1	1	1	1	1	1	1	1	1	1
1	1	1	1	1	1	1	1	0	1
1	1	1	1	1	0	1	1	1	1
1	1	1	1	1	0	1	1	1	1
1	1	1	1	1	1	1	1	0	1
1	1	1	1	1	0	1	1	1	1
1	1	0	1	1	0	1	1	1	1
1	1	1	1	1	0	1	1	1	1
1	1	0	1	1	1	1	1	1	1
1	1	1	1	1	1	1	1	1	1
1	1	1	1	1	0	1	1	1	0
1	0	1	1	1	1	1	1	1	1
1	1	1	1	1	1	1	1	1	1
1	1	1	1	1	1	0	0	0	1
1	1	1	1	0	1	1	1	1	1
1	1	1	1	1	1	1	1	1	1
1	1	1	1	1	1	1	1	1	1
1	1	1	1	1	1	1	1	1	1
1	1	1	1	1	1	1	1	1	1
1	1	1	1	1	1	1	1	1	1
1	1	1	1	1	1	1	1	1	1
1	1	1	1	1	1	1	1	1	1
1	0	1	1	1	1	1	1	1	1
1	1	1	1	1	1	1	1	1	1
1	1	1	1	1	1	1	1	1	1
1	1	1	1	1	1	1	1	1	1
1	1	1	1	1	0	1	1	1	1
1	1	1	1	1	1	1	1	1	1
1	1	1	1	1	1	1	1	1	0
1	1	1	1	1	1	1	1	1	1
1	1	1	1	1	1	1	1	1	0
1	1	1	1	1	0	1	1	0	1
1	0	1	1	0	1	0	1	1	1
1	1	0	1	1	1	1	1	1	1
1	1	1	1	1	1	1	1	1	1
1	1	1	1	1	1	1	1	1	1
1	1	1	1	1	1	1	1	1	1
1	0	1	1	1	1	1	1	1	1
1	1	1	1	1	1	1	1	1	1
1	1	1	1	1	1	1	1	1	1
1	1	1	1	1	1	1	1	1	1
1	1	1	0	1	1	1	1	1	1
1	0	1	1	1	1	1	1	1	1
1	1	1	1	1	1	1	1	1	1
1	1	1	1	1	1	1	0	1	1
1	1	1	1	1	1	1	1	1	1
1	1	1	1	1	0	1	1	1	1
1	1	1	1	1	1	1	1	1	1
1	1	1	1	1	1	1	1	1	1
1	1	1	1	1	1	1	1	1	1
1	1	1	1	1	1	1	1	1	1
1	1	1	1	1	1	1	1	1	1
1	1	1	0	1	1	0	1	1	1
1	1	1	1	1	1	1	1	1	1
0	1	1	1	1	1	1	1	1	1
1	1	1	0	1	1	1	1	1	1
1	1	1	1	1	1	1	1	1	1
1	1	1	0	1	1	1	1	1	1
1	1	1	0	0	1	1	1	1	1
1	1	1	1	1	1	1	1	1	1
1	1	1	1	1	1	1	1	1	1
1	1	1	1	1	1	1	1	1	1
1	1	1	1	1	1	1	1	1	1
1	1	1	1	1	1	1	1	1	1
1	1	1	1	1	1	1	0	0	0
1	1	1	1	1	1	1	1	1	1
1	1	1	1	1	1	1	1	1	1
1	1	1	1	1	1	0	1	1	1
1	1	1	1	1	1	1	1	1	1
1	1	1	1	1	1	1	1	1	1
1	1	1	1	1	0	1	1	1	1
1	1	1	1	1	1	1	1	1	1
1	1	1	1	1	1	1	1	1	1
1	1	1	0	1	1	1	1	1	1
1	1	1	1	1	1	0	1	1	1
1	1	1	1	1	1	1	1	1	1
1	1	1	0	1	1	1	1	1	1
1	1	1	1	1	1	1	1	1	1
1	1	1	1	1	1	1	1	1	1
1	0	1	1	1	0	1	1	1	1
0	1	1	1	1	1	1	1	1	1
1	1	1	1	1	0	1	1	1	1
1	1	1	1	1	1	1	1	1	1
1	1	1	1	0	1	1	1	1	1
1	1	1	1	1	1	1	1	1	1
1	1	0	1	1	1	1	1	1	1
1	1	0	1	1	1	1	0	0	0
1	1	1	1	1	1	1	1	1	1
1	1	1	1	1	1	1	1	1	1
1	1	1	1	1	1	1	1	1	1
0	1	1	1	1	1	1	1	1	1
1	1	1	1	1	1	1	1	1	1
0	1	1	1	1	1	1	1	1	1
1	0	1	1	1	1	1	1	1	1
1	1	1	1	1	1	1	1	1	1
1	1	1	1	1	1	1	1	1	1
1	1	1	1	1	1	1	1	1	1
1	1	0	0	1	1	1	0	1	1
1	1	1	1	1	1	1	1	1	1
1	0	1	1	0	1	1	1	1	1
0	1	0	1	1	1	1	1	1	1
1	1	1	1	1	1	1	1	1	1
0	1	1	1	1	1	1	1	1	1
1	1	1	1	1	1	1	1	1	0
1	1	1	1	1	1	1	1	1	1
1	1	1	1	1	1	1	1	1	1
1	0	1	1	1	1	1	1	1	0
1	1	1	1	1	1	1	1	1	1
1	1	1	1	1	1	1	1	0	1
1	1	1	1	1	1	0	0	1	1
1	1	1	1	1	0	1	1	1	1
1	1	1	1	1	1	1	1	1	1
1	1	1	1	1	1	1	1	0	1
1	1	1	1	1	1	1	1	1	1
1	1	1	1	1	1	1	1	1	1
1	1	1	1	1	1	1	1	1	1
1	1	1	1	1	1	1	1	1	1
0	1	1	1	1	1	1	1	1	0
1	1	1	1	1	1	1	1	1	0
1	1	1	1	0	1	1	1	1	1
1	1	1	1	1	1	1	1	1	1
1	1	1	1	1	1	1	1	1	1
1	1	1	1	1	1	0	1	1	1
0	1	1	1	1	1	1	1	1	1
1	1	1	1	1	1	1	0	1	1
1	1	1	1	0	1	1	1	0	1
1	1	1	1	1	0	1	0	1	1
1	1	1	1	1	1	1	1	1	1
1	1	1	1	1	1	1	1	1	1
1	1	1	1	1	1	1	1	1	1
1	1	0	1	1	1	1	1	1	1
1	1	1	1	1	1	1	1	1	1
1	1	1	1	1	1	1	1	1	1
1	1	1	1	1	1	1	1	1	1
1	1	1	1	1	1	1	1	1	1
1	1	1	1	1	1	1	1	1	1
1	1	1	1	1	1	1	1	1	1
1	1	1	1	1	1	1	1	1	1
1	1	1	1	1	1	1	1	1	1
1	1	1	1	1	1	1	1	1	1
1	1	1	1	1	1	1	1	1	1
1	1	1	1	1	1	1	1	1	1
1	1	1	1	1	1	1	1	1	1
1	1	0	1	1	1	1	1	1	1
1	1	0	1	1	1	1	1	1	1
1	1	0	1	0	1	0	1	1	0
1	1	1	1	1	1	1	1	0	1
1	1	1	1	1	1	1	1	1	1
1	1	1	1	1	1	1	1	1	1
1	1	1	1	1	1	1	1	1	1
1	1	1	1	1	1	1	1	1	1
1	1	1	1	0	1	1	0	1	1
1	1	1	1	0	1	1	1	1	1
1	1	1	1	0	1	1	1	1	1
1	1	1	1	1	1	0	1	1	1
1	1	1	1	1	1	1	1	1	1
1	1	1	1	1	1	1	1	1	1
1	1	1	0	1	1	1	1	1	1
1	1	1	1	1	1	1	1	1	1
1	1	1	1	1	1	1	1	1	1
1	1	1	1	1	1	1	1	1	1
1	0	1	1	1	1	1	1	1	1
1	1	1	1	1	1	1	1	1	1
0	1	1	1	1	1	1	1	1	1
1	1	0	1	1	1	1	1	1	1
1	1	1	1	1	1	1	1	1	1
1	1	1	1	1	1	1	1	1	1
1	1	1	1	1	1	1	1	1	1
1	1	1	1	1	1	0	1	1	1
1	1	1	1	1	1	1	1	1	1
1	1	1	1	1	1	1	1	1	1
1	1	0	1	1	1	1	1	1	1
1	1	0	1	1	0	1	1	1	1
1	1	1	1	1	1	1	1	1	1
1	1	1	1	1	1	1	1	0	1
1	1	1	1	1	1	1	1	1	1
1	1	1	1	1	1	1	1	1	1
1	1	1	1	1	1	1	1	1	1
0	1	1	0	1	1	1	1	1	1
1	0	1	1	0	1	1	0	1	1
1	1	1	1	1	1	1	1	1	0
1	1	1	1	1	1	1	1	0	1
1	1	1	1	1	1	1	1	1	1
1	1	1	1	1	1	1	1	1	1
1	1	1	1	1	1	1	1	1	1
1	1	1	1	1	1	1	1	0	1
0	1	1	1	1	1	1	1	1	1
1	1	1	1	1	1	1	1	1	1
1	1	1	1	1	1	0	1	1	1
1	1	1	1	0	1	1	1	1	1
1	1	1	1	1	1	1	1	1	1
0	1	1	0	1	1	1	1	1	1
1	1	1	1	1	1	1	1	1	1
1	1	1	1	1	1	1	1	1	1
1	1	1	1	0	1	1	1	1	1
1	1	1	1	1	1	1	1	1	1
1	1	1	1	1	1	1	1	1	1
1	1	1	1	1	1	1	1	1	1
1	1	1	1	1	1	1	1	1	0
1	1	1	1	1	1	1	1	1	1
1	1	1	1	1	1	1	1	1	1
1	1	1	1	1	1	1	1	1	1
1	1	1	1	1	1	1	1	1	1
1	1	1	1	1	1	1	1	1	1
1	1	1	1	1	1	1	1	1	1
1	1	1	1	1	1	1	1	1	1
1	1	1	1	1	1	1	1	1	1
1	1	1	1	1	1	1	1	1	0
1	1	1	1	1	1	1	1	1	0
1	1	1	1	1	1	1	1	1	1
1	1	1	1	0	1	1	1	1	1
1	1	1	1	1	1	1	1	1	1
1	1	1	1	1	1	1	1	1	1
1	1	1	1	1	1	1	1	0	1
1	1	1	1	1	0	1	1	1	1
1	1	1	1	0	0	1	1	1	1
1	1	1	1	1	0	1	1	1	0
1	1	1	1	1	1	1	1	1	1
1	1	1	1	1	1	1	1	1	1
1	1	1	1	1	1	1	1	1	1
1	1	1	1	1	1	1	1	1	1
1	1	1	1	1	1	1	1	1	1
1	1	1	1	1	1	0	1	1	1
1	1	1	1	1	1	1	1	1	1
1	1	1	1	1	1	1	1	1	1
1	1	1	1	1	1	1	1	1	1
1	1	1	1	1	1	1	1	0	1
0	1	1	1	1	1	1	1	1	1
1	1	1	1	1	1	1	0	1	1
0	1	1	1	1	0	1	1	1	1
1	1	1	1	1	1	1	1	1	1
1	1	1	1	1	1	1	1	0	1
1	1	1	0	1	1	1	1	1	1
1	1	1	1	1	1	1	1	1	1
1	1	1	1	1	1	1	1	1	1
1	1	1	1	1	1	1	1	1	1
1	1	1	1	1	0	1	1	1	1
1	1	1	1	1	1	1	1	1	1
1	1	1	1	1	1	1	1	1	1
1	1	1	1	1	1	1	1	1	1
1	1	0	1	1	1	1	1	1	1
1	1	1	1	1	1	1	0	0	1
1	1	1	1	1	1	1	1	1	1
1	1	1	1	1	1	1	1	1	1
1	1	1	1	1	1	1	1	1	1
1	1	1	1	1	1	0	1	1	1
1	1	1	1	1	1	1	1	1	1
1	1	1	1	1	1	1	1	1	1
1	1	1	1	1	1	1	1	1	1
0	1	1	1	1	1	1	1	1	1
0	1	1	1	1	1	1	1	1	1
1	1	1	1	1	1	1	1	1	1
1	1	1	1	1	1	1	1	1	1
1	1	1	1	1	1	1	1	1	1
1	1	1	1	1	1	1	1	1	1
1	1	0	1	1	1	0	1	1	1
1	1	1	1	1	0	1	0	1	0
1	1	1	1	1	1	1	1	1	1
1	1	1	1	1	1	1	1	1	1
1	1	1	1	1	1	1	1	1	1
1	1	1	1	1	1	1	1	1	1
1	1	1	1	1	1	1	1	1	1
1	1	1	1	1	1	1	1	1	1
1	1	1	1	1	1	1	1	0	1
1	1	1	1	1	1	1	1	1	1
1	1	1	1	1	1	0	1	1	1
1	1	1	1	1	1	1	1	1	1
1	1	1	1	1	1	1	1	1	1
1	1	1	1	1	1	1	1	1	1
1	1	1	1	1	1	1	1	1	1
1	1	0	1	1	1	1	1	1	1
1	1	1	1	1	1	1	1	1	1
1	1	1	1	1	1	1	1	1	1
1	1	1	1	1	1	1	1	1	1
1	1	1	1	1	1	1	1	1	1
1	1	1	1	0	1	1	1	1	1
1	1	1	1	1	1	1	1	1	1
0	1	1	1	1	1	1	1	1	1
1	1	1	1	1	1	1	1	1	1
1	1	1	1	1	1	0	1	1	1
1	1	1	1	1	1	1	1	1	1
1	1	1	1	1	1	1	1	1	1
1	1	1	1	1	1	1	1	1	1
1	1	1	1	1	1	1	1	1	1
1	1	1	1	1	1	1	1	1	1
1	1	1	1	1	1	1	1	1	1
1	1	1	1	1	0	1	1	1	1
1	1	1	1	1	1	1	1	1	1
1	1	1	1	1	0	1	1	1	1
1	1	0	1	0	1	1	1	0	1
1	1	0	1	1	0	1	1	1	1
1	1	1	1	1	1	1	1	1	1
1	0	1	1	1	1	1	1	1	1
1	1	1	1	1	1	1	1	1	1
1	1	0	1	1	1	1	1	1	1
1	1	1	1	1	0	1	1	1	1
1	1	1	0	1	0	1	1	1	1
1	1	1	1	1	0	1	1	0	1
1	1	1	1	1	0	1	1	1	1
1	1	1	1	1	1	1	1	1	1
1	1	1	1	1	1	1	1	1	1
1	1	1	1	0	1	1	1	1	1
1	1	1	1	1	1	1	1	1	1
1	1	1	1	1	1	1	1	1	1
0	0	1	1	1	1	0	1	1	1
1	1	1	1	1	1	1	1	1	1
1	1	1	1	1	1	0	1	1	1
1	1	1	1	1	1	1	1	1	1
1	1	0	1	0	1	1	1	1	1
1	1	0	1	1	1	1	1	1	1
1	1	1	1	1	0	1	0	1	1
1	1	1	1	1	1	0	1	1	1
1	1	1	1	1	1	0	1	1	1
1	1	1	0	1	1	1	1	1	1
1	1	1	1	1	1	1	1	1	0
1	1	1	1	1	1	1	0	1	1
1	1	1	1	1	1	1	1	1	1
1	1	1	1	1	1	1	1	1	1
1	1	1	1	1	1	0	1	1	1
1	1	1	1	1	1	1	1	1	1
1	1	1	1	1	1	0	1	1	1
1	1	1	1	1	1	1	1	1	1
1	1	1	1	1	1	0	1	1	1
1	1	1	1	1	1	1	0	1	1
1	1	1	1	1	1	1	1	1	1
1	1	1	1	1	1	1	1	1	1
1	1	1	1	1	1	1	1	1	1
1	1	1	1	1	1	1	1	1	1
1	1	1	1	1	1	1	1	1	1
1	1	1	1	1	1	1	1	1	1
1	1	1	1	1	1	1	0	1	1
1	1	1	1	1	1	1	1	1	1
1	1	1	0	1	1	1	1	1	1
1	1	1	1	1	1	1	1	1	1
1	1	1	1	1	1	1	1	1	1
1	1	1	1	1	1	1	1	1	1
1	1	1	1	1	1	1	1	1	1
1	0	1	1	1	1	0	1	1	1
1	1	1	1	1	1	1	0	1	1
1	1	0	1	1	1	1	1	1	0
1	1	1	1	1	1	1	1	1	1
1	1	1	1	1	0	1	1	1	1
1	1	1	1	1	0	1	1	1	1
1	1	1	1	1	1	1	1	0	1
1	1	1	1	1	1	1	1	1	1
1	1	1	1	1	1	1	1	1	1
1	1	1	1	1	1	1	1	1	1
1	1	1	1	1	1	1	1	1	1
1	1	1	1	1	1	1	1	1	1
1	1	1	1	1	1	1	1	1	1
1	1	1	1	1	1	1	1	1	1
1	1	1	1	1	1	0	1	1	1
1	1	1	1	1	1	1	1	1	1
1	1	1	1	1	1	0	1	1	1
1	1	1	1	1	1	1	1	1	1
1	1	1	1	1	1	1	1	1	1
1	1	1	1	1	1	1	1	0	1
0	1	1	1	1	1	1	1	1	1
1	1	0	1	1	1	1	1	1	1
1	1	1	1	1	1	1	1	1	1
1	1	1	1	1	1	1	1	1	0
0	1	0	1	1	1	1	1	0	1
1	1	1	1	1	1	1	0	1	1
1	1	1	1	1	1	1	1	0	1
1	0	0	1	1	1	1	1	1	1
1	1	1	1	0	1	1	1	1	1
1	1	1	1	1	1	1	1	1	1
1	1	0	1	1	1	1	1	1	1
1	1	1	1	1	1	1	1	1	1
1	1	1	1	1	1	1	1	1	1
0	1	1	1	1	1	1	1	1	1
1	1	1	1	1	1	1	1	1	1
1	1	1	1	1	1	1	1	1	0
1	1	1	0	1	1	1	1	1	1
1	1	0	1	1	1	1	1	1	1
1	1	1	1	1	1	1	1	1	1
1	0	1	1	1	1	1	1	1	1
1	1	1	1	1	1	1	1	1	1
1	1	1	1	1	1	1	1	1	1
1	1	1	1	1	1	1	1	1	1
1	1	1	1	1	1	0	1	1	1
1	1	1	1	1	1	1	1	1	1
1	1	1	1	1	1	0	1	1	1
1	1	1	1	1	1	1	1	1	1
1	1	1	1	1	0	0	1	1	1
1	1	1	1	1	1	1	1	1	1
1	1	1	1	1	1	1	1	1	1
1	1	1	1	1	1	1	0	1	1
1	1	1	1	1	1	1	1	1	1
1	1	1	1	1	1	1	1	1	1
1	1	1	1	1	1	1	1	1	0
1	1	1	1	1	1	1	1	1	1
1	1	1	1	1	1	1	1	1	1
1	1	1	1	1	1	1	1	1	1
1	1	1	1	1	1	1	1	1	1
1	1	1	1	1	1	1	1	1	1
1	1	1	1	1	1	1	1	1	1
1	1	1	1	1	1	1	1	1	1
1	1	1	1	1	1	1	1	1	1
1	0	1	1	1	1	1	1	1	1
1	1	1	1	1	1	1	1	1	1
1	1	1	1	0	1	0	1	1	1
1	1	1	1	1	1	1	1	1	1
1	1	1	1	1	1	1	1	0	1
1	1	1	1	1	1	1	1	1	1
1	1	1	1	1	1	1	1	1	1
1	1	1	1	1	1	1	1	1	1
1	1	1	1	1	1	1	1	1	1
1	1	1	1	1	1	1	1	1	1
1	1	1	1	1	1	1	1	1	1
1	0	1	1	1	0	1	1	1	1
1	1	1	1	1	1	1	1	1	1
1	1	1	1	1	1	1	1	1	1
1	1	1	1	1	1	1	1	1	1
1	1	1	1	1	1	1	1	1	1
0	1	1	1	1	1	1	1	1	1
1	1	1	1	1	1	1	1	1	1
1	1	1	1	1	1	1	1	1	1
1	1	1	1	1	1	0	1	1	1
1	1	1	0	1	1	1	1	1	1
1	1	1	0	1	1	0	1	1	1
1	0	1	1	1	1	1	1	0	1
1	1	1	1	1	1	1	1	1	1
0	1	0	1	1	1	1	1	1	1
1	1	1	1	1	0	1	1	1	1
1	1	1	1	1	1	1	1	1	1
1	1	1	1	1	1	1	1	0	1
1	1	0	1	1	1	1	1	1	1
1	1	1	1	1	1	1	1	1	1
1	1	1	1	1	1	1	1	1	1
1	1	0	1	1	1	1	1	1	1
1	1	1	1	1	1	1	1	1	1
1	1	1	1	1	1	1	1	1	1
1	1	1	1	1	1	1	1	1	1
1	1	1	1	1	1	0	1	1	1
1	1	1	1	1	1	1	0	1	1
1	1	1	1	1	1	1	1	1	1
1	1	1	1	1	1	1	1	1	1
1	1	1	1	1	1	1	1	1	1
1	1	1	1	1	1	1	1	1	1
1	1	1	0	1	1	1	1	1	1
1	1	1	1	1	1	1	1	1	1
1	1	1	1	1	1	1	1	1	1
1	1	1	1	1	1	1	1	1	1
1	1	1	1	1	1	1	1	1	1
1	1	1	1	1	1	1	1	1	1
1	1	1	1	1	1	1	1	1	1
1	1	1	1	1	1	1	1	1	1
0	1	1	1	1	1	1	1	1	1
1	1	1	1	1	1	1	1	1	1
1	1	1	1	1	1	1	0	1	1
1	1	1	1	1	1	1	1	1	1
1	1	1	1	1	1	1	1	1	1
1	1	1	1	1	1	1	1	1	1
1	1	1	1	1	1	1	1	1	1
1	1	1	1	1	1	1	1	0	1
1	1	1	1	1	1	1	1	1	1
1	1	1	1	1	1	1	1	1	1
1	1	1	1	1	1	1	1	1	1
1	1	1	1	0	1	1	1	1	1
1	1	1	1	1	1	1	0	1	0
1	1	1	1	1	0	1	1	1	1
1	1	0	1	1	1	1	1	1	1
1	0	1	1	1	1	1	1	1	1
1	1	1	1	1	1	1	1	1	1
1	1	1	1	1	1	1	1	0	1
1	1	1	1	1	1	1	0	1	1
1	1	1	1	1	1	1	1	1	1
1	1	0	1	1	1	1	1	1	1
1	1	1	1	0	1	1	1	1	1
1	1	1	1	1	1	1	1	1	1
1	1	1	0	1	1	0	1	1	1
1	1	1	1	1	1	1	0	1	1
1	1	1	1	1	1	1	1	0	1
1	1	1	1	1	1	1	1	1	1
0	1	1	1	1	1	1	1	1	1
1	1	1	1	1	1	1	1	1	1
1	1	1	1	1	1	1	1	1	1
1	1	1	0	1	0	1	1	1	1
1	0	1	1	1	1	1	1	1	1
1	1	1	1	1	1	1	1	1	1
1	0	1	1	1	0	1	1	1	1
1	1	1	1	1	1	1	1	1	1
1	1	1	1	1	1	1	1	1	1
1	1	1	1	0	1	1	1	1	1
1	1	1	1	1	1	1	1	1	1
1	1	1	1	1	1	1	1	1	1
1	1	1	1	1	1	1	1	1	1
1	1	1	1	1	1	1	1	1	1
1	1	0	1	1	1	1	1	1	0
1	1	1	1	1	1	1	1	1	1
1	1	1	1	1	1	1	1	1	1
1	1	1	1	1	0	1	1	0	1
1	1	1	1	0	1	1	1	1	1
1	1	1	1	1	0	1	1	1	1
1	1	1	1	1	1	1	1	1	1
1	0	1	1	1	1	1	1	1	1
1	1	1	1	1	1	1	1	1	1
1	1	1	1	1	1	0	1	1	1
1	1	1	0	1	1	1	1	1	1
0	1	1	1	1	0	0	1	1	1
0	1	1	0	1	1	1	1	1	1
1	1	0	1	1	1	0	1	1	1
1	0	1	1	1	1	1	1	1	1
1	1	1	1	1	1	1	1	1	1
1	1	1	1	1	1	1	1	1	1
1	0	1	1	1	1	0	1	1	1
1	1	1	1	1	1	1	1	1	1
1	1	1	1	1	1	1	1	1	1
1	1	1	1	1	1	1	1	1	1
1	1	0	1	1	1	1	1	1	1
1	1	1	1	1	1	1	1	1	1
1	1	1	1	0	1	1	0	1	1
1	1	1	0	1	1	0	1	1	1
0	1	0	1	1	1	1	1	1	1
1	1	1	1	1	1	0	1	1	1
1	1	1	1	1	1	1	1	1	1
1	1	1	1	1	1	1	1	1	1
1	1	1	1	1	1	1	1	1	1
1	1	1	1	1	1	1	1	1	1
1	1	1	1	0	1	1	1	1	1
1	1	1	1	0	1	1	1	1	1
1	1	1	1	1	1	1	1	1	1
1	1	1	1	1	1	1	1	1	1
1	1	1	1	1	1	1	1	1	1
1	1	1	1	1	1	1	1	1	1
1	1	1	1	1	1	1	1	1	1
1	1	1	1	1	1	1	1	1	1
1	1	1	1	1	1	1	1	1	1
1	1	1	1	1	1	1	1	1	1
1	1	1	1	0	1	1	1	1	1
1	0	1	1	1	1	1	1	1	1
1	1	1	1	1	1	1	1	1	1
1	1	1	1	1	1	1	1	1	1
1	1	1	1	1	1	1	1	1	1
1	1	1	1	1	0	1	1	1	0
1	1	1	1	0	1	1	1	1	1
1	1	1	1	1	1	1	1	1	1
1	1	1	1	1	1	1	1	1	1
1	1	1	1	1	1	1	0	1	1
1	1	1	1	1	1	1	1	1	1
1	1	1	1	1	1	1	1	1	1
1	1	1	1	1	1	1	1	1	1
1	1	1	1	1	1	1	1	1	1
1	1	1	1	1	1	1	1	1	1
1	1	1	1	1	1	0	1	1	1
1	1	1	1	1	1	1	1	1	1
1	1	1	1	1	1	1	1	1	1
1	1	1	1	1	1	1	1	1	1
1	1	1	1	1	1	1	1	1	1
1	1	1	1	1	1	1	1	1	1
0	1	1	1	1	1	1	1	1	1
1	0	1	1	1	1	1	1	1	1
1	1	1	1	1	1	1	1	1	1
1	1	0	1	1	1	1	1	1	1
1	1	1	1	0	1	1	1	1	1
1	1	1	1	1	1	1	1	1	1
1	1	1	1	1	1	1	1	1	1
1	1	1	1	1	1	1	1	1	1
1	0	1	1	1	1	1	1	1	1
1	1	1	1	1	1	1	1	1	1
1	1	1	1	1	1	1	1	1	1
1	1	1	1	1	1	1	1	1	1
1	1	1	1	1	1	1	1	1	1
1	1	1	1	1	1	1	1	1	0
1	1	1	1	1	1	1	1	1	1
1	1	1	1	1	1	1	1	1	1
1	1	1	1	1	1	1	1	1	1
1	1	1	1	1	0	1	1	1	1
1	1	1	0	1	1	1	1	1	1
1	1	1	1	1	1	1	1	1	1
1	1	1	1	1	1	1	1	1	1
1	1	1	1	1	1	1	1	1	1
1	1	1	1	1	1	1	1	1	1
1	1	1	1	1	1	1	1	1	1
1	0	1	1	1	1	1	1	1	1
1	1	1	1	1	1	1	1	1	1
1	1	1	1	1	1	1	1	1	1
1	1	1	1	1	0	1	1	1	1
1	1	1	1	1	1	1	1	1	1
1	1	1	1	1	1	1	1	1	1
1	1	1	1	1	1	0	1	1	1
1	0	1	1	1	1	1	1	1	1
1	1	1	1	1	1	1	1	1	0
1	1	1	1	1	1	1	1	1	1
1	1	1	1	1	1	0	1	1	1
1	1	0	1	1	1	1	1	1	1
1	1	1	1	1	1	1	1	1	1
1	1	1	1	1	1	1	1	1	1
1	1	1	1	1	1	1	1	1	1
0	1	1	1	1	1	1	1	1	1
1	1	1	1	0	1	1	1	1	1
1	1	1	1	1	1	1	0	1	1
1	1	1	1	0	1	1	1	1	1
1	1	1	1	1	1	1	1	1	1
1	0	1	0	1	1	1	1	1	1
1	0	1	1	1	1	1	1	1	1
1	1	0	1	1	1	1	1	1	0
1	1	1	1	1	1	1	1	1	1
1	0	1	1	1	1	1	0	1	1
1	1	1	1	1	1	0	1	1	1
1	1	0	1	1	1	1	1	1	1
1	1	1	1	1	1	1	1	1	1
1	0	1	1	1	1	1	1	1	1
1	1	1	1	1	1	1	1	1	0
0	1	1	1	1	1	1	1	1	1
1	1	1	1	1	1	1	1	1	1
1	1	1	1	1	1	0	1	1	1
1	1	1	0	1	1	1	1	1	1
1	1	1	1	1	1	1	1	1	1
0	0	1	1	1	1	1	1	1	1
1	1	1	1	1	1	1	1	1	1
1	1	1	1	1	1	1	1	0	1
1	1	1	0	1	1	1	1	1	1
1	1	1	1	1	0	1	1	1	1
1	1	0	1	1	1	1	1	1	1
1	1	1	1	1	1	1	1	1	1
1	1	1	1	1	1	1	1	0	1
1	1	1	1	1	1	1	1	1	1
1	1	1	1	1	1	1	1	1	1
1	1	1	1	1	1	1	1	1	1
1	1	1	1	1	1	1	1	1	0
1	1	1	1	1	1	0	1	1	1
1	1	1	1	1	1	1	1	1	1
1	1	1	1	1	1	1	1	1	1
1	1	1	1	1	1	1	1	1	1
1	1	1	1	1	1	1	1	1	1
1	1	1	1	1	0	1	1	1	1
1	1	1	1	1	1	1	1	1	1
1	1	1	1	1	1	1	1	1	1
1	1	1	1	1	1	1	1	1	1
1	1	1	1	1	1	1	0	1	1
0	1	1	1	1	1	1	1	1	1
1	1	1	1	1	1	1	1	1	1
1	1	1	1	1	1	1	1	1	0
1	1	1	1	1	1	1	1	1	1
1	1	1	1	1	1	1	1	1	1
1	1	0	1	1	1	1	0	1	1
1	1	1	1	1	1	1	1	1	1
1	0	1	1	1	1	1	1	1	1
1	1	1	1	1	1	1	1	1	1
1	0	1	1	1	1	1	1	1	1
1	1	1	1	1	1	1	1	1	1
1	1	1	1	1	1	1	1	1	1
1	1	1	1	1	1	1	1	1	1
1	1	1	1	0	1	1	1	1	1
1	1	1	1	1	1	1	1	1	1
1	1	1	1	1	1	1	0	1	1
1	1	0	1	1	1	1	1	1	1
1	1	1	1	1	1	1	1	1	1
1	1	1	1	1	1	1	1	1	1
1	1	1	1	1	0	1	1	1	1
0	1	1	1	1	1	1	1	1	1
1	1	1	1	0	1	1	1	1	1
1	1	1	1	1	1	1	1	1	1
1	1	1	1	1	1	1	1	1	1
0	1	1	1	0	1	1	1	1	1
1	1	1	1	1	1	1	1	1	1
1	1	1	1	0	1	1	1	1	1
1	1	1	1	1	1	1	1	1	1
1	1	1	1	1	1	1	1	1	1
1	1	1	1	1	1	1	1	1	1
1	1	1	1	1	1	1	0	1	1
1	1	1	1	1	1	1	1	0	1
1	0	0	1	1	1	1	1	1	1
1	1	1	1	1	0	1	1	1	1
1	1	1	1	0	1	1	1	1	1
1	1	1	1	1	1	1	1	1	1
1	1	1	1	1	1	1	1	1	1
1	1	1	1	1	1	1	1	1	1
1	1	1	1	1	1	1	1	1	1
0	1	1	1	1	1	1	1	1	1
1	1	1	1	1	1	1	0	1	1
1	1	1	1	1	1	1	1	1	1
1	1	0	1	0	1	1	1	1	1
1	1	0	1	1	1	1	1	1	1
1	1	1	1	1	1	1	1	1	1
1	1	1	1	1	1	1	0	1	1
1	1	1	1	1	1	1	1	1	1
1	1	0	1	1	1	1	1	1	1
1	1	1	1	1	1	1	1	1	1
1	1	1	1	1	1	1	1	1	1
1	1	1	1	1	1	1	1	1	1
1	1	1	1	1	1	1	1	1	1
1	1	1	0	1	1	0	1	1	1
1	1	1	1	1	1	1	1	1	1
0	0	1	1	1	1	0	1	1	1
1	1	1	1	1	1	1	1	1	1
1	1	0	1	1	1	1	1	1	1
1	1	1	1	1	1	1	1	1	1
1	1	1	1	1	1	1	1	1	1
1	1	1	1	1	1	1	1	0	0
1	0	1	1	1	1	1	1	1	1
1	1	1	1	1	1	1	1	1	1
1	1	1	1	1	1	1	1	1	1
1	1	1	0	1	1	1	1	0	1
1	1	1	0	1	1	0	1	1	1
1	1	1	1	1	1	1	1	1	1
1	1	1	1	1	1	1	1	1	0
1	1	1	1	1	1	1	1	1	1
1	1	1	1	1	1	1	1	1	1
1	1	0	1	1	1	1	1	1	1
1	1	0	1	1	1	0	1	1	1
1	1	1	1	1	1	1	0	1	0
1	1	1	1	1	1	1	1	1	0
1	1	1	1	1	1	1	1	1	1
1	1	1	1	1	1	1	1	1	1
1	1	1	1	0	0	1	0	1	1
1	1	1	1	1	1	1	1	1	1
1	1	1	0	1	1	1	1	1	1
1	1	1	1	1	1	1	1	1	1
1	1	1	1	1	1	1	1	1	1
1	1	0	0	1	1	1	1	1	1
1	1	1	1	1	1	1	1	1	1
1	1	1	1	1	1	1	1	1	1
0	1	1	1	1	1	1	1	1	1
1	1	1	1	1	1	1	1	1	1
1	1	1	1	1	1	1	0	1	1
1	1	1	1	1	1	1	1	1	1
1	1	1	1	0	1	1	1	1	1
0	1	1	1	1	1	1	1	1	1
1	1	1	0	1	0	1	1	1	1
1	1	1	1	1	1	1	1	1	1
1	0	1	1	1	1	1	1	1	1
1	1	1	1	1	1	1	1	1	0
1	1	1	1	1	1	1	1	1	1
1	1	1	1	1	1	1	1	1	1
1	1	1	1	1	1	1	1	1	1
1	1	1	1	1	1	1	1	1	1
1	1	1	1	1	1	1	1	1	1
1	1	1	1	1	1	1	1	0	1
1	1	1	1	1	1	1	1	1	1
1	1	1	1	1	1	1	1	1	1
1	0	1	1	1	1	1	1	1	1
1	1	1	1	1	1	1	1	1	1
1	1	1	1	1	1	1	1	1	1
1	1	1	1	1	1	1	1	1	1
1	1	1	1	1	1	1	1	1	1
1	1	1	1	1	1	1	1	1	1
1	1	1	1	1	1	1	0	1	1
1	1	1	1	1	1	1	1	0	1
1	1	1	1	1	1	1	1	1	1
1	1	1	1	1	1	1	1	1	1
1	1	1	1	0	1	1	1	1	1
1	1	1	1	1	1	1	1	1	1
0	1	1	1	1	1	1	1	1	1
1	0	1	1	1	1	1	1	1	1
1	1	1	1	1	1	1	1	1	0
1	1	1	1	1	0	1	1	1	0
1	1	1	1	1	0	1	1	1	1
0	1	1	1	1	1	1	1	1	1
1	1	1	1	1	1	1	1	1	1
1	1	1	1	0	1	0	1	1	1
1	0	1	0	1	1	1	1	1	1
1	1	1	1	1	0	1	1	1	1
1	1	1	1	1	1	1	1	1	1
1	1	1	1	1	1	1	1	1	1
1	1	1	1	1	1	1	1	1	1
1	1	1	1	1	1	1	1	1	1
1	1	1	1	1	1	1	1	1	1
1	0	1	1	1	1	1	1	1	1
1	1	1	1	1	1	1	1	1	1
1	1	0	0	0	1	1	1	1	1
1	1	1	1	1	1	1	1	1	1
1	0	0	1	1	1	1	1	1	1
1	1	1	1	1	1	1	1	1	1
1	1	1	1	1	1	0	1	1	1
1	0	1	1	1	1	0	1	1	1
1	1	1	1	1	1	1	1	1	1
1	1	1	1	1	1	1	1	1	1
1	1	1	1	1	1	1	1	1	1
1	1	1	1	1	1	1	1	0	1
1	1	1	1	1	1	1	1	1	1
1	1	1	0	1	1	0	1	1	1
1	1	1	1	1	1	0	1	1	1
1	1	1	1	1	1	1	1	1	0
1	1	1	1	1	0	1	1	1	1
1	1	0	1	1	1	1	1	1	1
1	1	0	1	1	1	1	1	1	1
1	1	1	1	1	1	1	1	1	1
1	1	1	1	1	1	1	1	1	1
1	0	1	1	1	1	1	1	1	1
1	1	1	1	1	0	1	1	1	1
1	1	1	1	1	1	1	1	1	1
1	1	1	1	1	1	1	1	1	1
1	1	1	1	1	1	1	1	0	1
1	1	1	1	1	1	1	1	1	1

## Sheet: hrl
0	0	0	0	0	0	0	0	0	0
0	0	0	0	0	0	0	0	0	0
0	0	0	0	0	0	0	0	0	0
0	0	0	0	0	0	0	0	0	0
0	0	0	0	0	0	0	0	0	0
0	0	0	0	0	0	0	0	0	0
0	0	0	0	0	0	0	0	0	0
0	0	0	0	0	0	0	0	0	0
0	0	0	0	0	0	0	0	1	1
0	0	0	0	0	0	0	0	0	0
0	0	0	0	0	0	0	0	0	0
0	0	0	0	0	0	0	0	0	0
0	0	0	0	0	0	0	0	0	0
0	0	1	0	0	0	0	0	0	0
0	0	0	0	0	0	0	0	0	0
0	0	0	0	0	0	0	0	0	1
0	0	0	0	0	0	0	0	0	0
0	0	0	0	0	0	0	0	0	0
0	0	1	1	0	0	0	0	0	0
0	0	0	0	0	0	0	0	0	0
0	0	1	0	0	0	0	0	0	0
0	0	0	0	0	0	0	1	0	0
0	1	0	0	0	0	0	0	0	0
0	0	0	1	0	0	0	0	0	0
0	0	0	1	0	0	0	0	0	0
0	0	0	0	0	0	0	0	1	0
0	0	0	0	0	0	0	0	1	1
0	0	0	0	0	0	0	0	0	0
0	1	0	0	0	0	0	0	0	1
0	0	0	0	0	0	0	0	0	0
1	0	1	0	1	0	1	0	1	0
0	0	0	0	0	1	0	1	0	0
0	1	0	0	0	0	0	0	0	0
1	0	0	0	0	0	0	0	0	0
0	0	0	1	0	0	0	0	0	1
0	0	0	1	0	0	0	0	0	0
0	1	0	0	0	1	0	0	0	0
1	0	0	0	0	1	0	1	0	1
0	0	0	0	1	1	1	0	0	1
0	0	1	0	0	0	0	0	0	0
0	0	0	0	0	0	0	0	0	1
1	0	0	0	0	0	0	0	0	0
0	0	0	0	0	0	0	0	0	0
0	0	0	0	0	0	0	0	0	1
1	0	0	0	0	0	0	0	1	1
0	1	0	1	0	0	1	0	1	0
0	0	0	0	0	1	1	1	1	0
0	0	1	0	0	0	0	0	0	1
0	0	1	0	0	0	0	0	0	0
1	0	0	1	0	0	1	1	0	0
0	0	0	1	0	1	0	0	0	0
0	0	1	0	0	0	0	0	0	0
0	0	0	0	0	0	0	1	0	0
0	0	0	1	0	0	0	0	1	0
0	0	1	0	0	0	0	0	0	0
0	0	0	0	0	1	0	0	0	1
0	0	0	0	0	0	0	1	1	0
0	1	1	0	0	0	1	0	0	0
1	0	0	1	0	0	1	0	1	1
0	1	0	1	0	0	1	0	1	0
1	0	0	1	0	0	0	0	0	0
0	0	0	0	0	1	0	0	1	0
0	0	1	0	0	0	0	1	0	0
0	1	0	0	0	0	0	0	0	0
1	0	1	1	0	0	0	0	1	1
0	0	0	1	0	1	0	0	1	0
0	0	0	0	0	1	0	0	0	0
0	0	1	0	1	1	0	1	0	0
0	0	1	1	0	0	1	0	1	0
0	0	0	1	0	0	1	0	0	0
0	1	0	0	0	0	0	0	1	0
1	1	1	0	0	0	1	1	1	0
0	0	1	0	0	1	0	0	0	0
0	1	0	0	0	0	0	0	0	1
1	0	0	0	0	0	1	0	1	1
1	1	0	0	0	0	0	1	0	1
0	0	0	0	0	1	0	1	0	0
1	0	0	0	0	1	1	0	1	0
0	1	1	0	1	0	0	1	1	0
1	1	0	0	1	0	0	0	1	0
1	0	0	1	0	0	0	0	0	1
0	0	1	0	0	0	1	1	0	0
1	0	0	0	1	0	0	0	1	0
1	0	0	1	0	0	1	0	0	0
0	0	0	0	0	0	0	0	0	1
1	0	0	0	0	0	1	1	0	1
0	0	0	0	0	0	1	1	0	0
0	0	0	0	0	0	0	0	0	0
1	0	0	0	0	0	0	0	0	0
0	0	1	0	0	1	1	1	1	0
0	0	0	1	0	1	0	0	1	0
0	1	0	0	0	0	0	1	0	0
0	0	1	0	1	0	0	1	0	0
0	0	0	0	1	0	1	0	1	0
1	0	0	0	1	0	0	1	0	1
1	1	1	1	0	0	0	0	0	0
0	0	1	0	0	0	0	0	1	1
0	0	0	0	1	0	1	1	0	0
1	0	0	0	0	0	0	0	1	0
0	0	0	0	0	0	0	0	0	0
1	1	1	1	0	0	0	1	0	0
0	1	0	0	1	0	1	0	0	1
1	0	0	0	0	1	1	0	1	1
0	0	1	1	0	1	0	0	0	0
0	0	1	1	0	0	0	0	1	0
1	0	0	0	0	1	0	1	0	1
0	1	1	0	1	1	0	1	1	0
0	0	1	0	0	0	0	0	0	1
1	0	1	0	0	0	1	0	1	0
0	1	1	0	0	0	1	1	0	0
1	0	0	0	0	0	0	0	1	0
1	0	0	1	0	0	1	0	0	1
0	0	1	1	0	1	0	0	0	0
0	0	1	0	0	0	1	0	0	1
0	0	0	0	0	0	0	0	0	1
1	1	0	0	1	0	1	0	0	0
0	0	0	0	1	1	0	1	1	1
1	0	0	1	0	0	0	1	1	0
0	0	0	0	0	0	0	1	0	1
0	0	1	1	1	0	0	0	0	0
0	0	0	0	0	0	1	1	0	1
0	1	0	0	0	1	0	0	1	0
0	0	0	0	0	0	0	0	0	0
0	0	1	0	0	0	1	1	0	0
1	0	0	0	0	0	0	0	0	0
0	0	0	0	0	0	1	0	0	0
0	0	0	0	1	0	0	0	1	0
0	0	0	0	0	0	0	1	0	0
0	0	0	1	0	0	1	0	0	0
1	0	0	0	1	0	0	0	0	1
0	0	0	0	0	0	0	0	1	0
1	0	0	0	0	0	0	0	0	0
0	0	0	0	0	1	0	0	0	0
0	0	1	0	0	0	0	0	1	0
0	1	0	0	0	0	1	0	0	1
0	0	0	0	1	0	1	0	0	1
0	1	0	1	1	0	1	1	0	1
0	0	0	0	1	0	0	1	0	1
0	1	1	0	0	0	1	0	1	0
0	1	0	1	1	0	1	0	1	1
0	1	1	1	0	0	0	0	1	0
0	1	1	1	0	0	0	0	1	0
0	0	1	0	1	0	0	0	0	0
0	0	0	0	0	0	0	0	1	1
1	1	0	0	1	1	1	0	0	1
0	1	0	0	1	0	0	0	0	1
0	0	0	0	0	1	0	0	1	0
0	0	0	0	0	0	1	0	0	1
0	0	0	1	0	0	0	0	0	0
0	0	0	0	0	1	0	0	1	0
0	0	0	0	1	0	0	1	0	1
0	1	1	0	0	0	0	1	0	0
0	0	0	0	1	1	0	1	1	0
0	1	1	0	0	1	1	0	1	0
0	0	0	1	1	0	0	0	1	1
0	0	1	0	0	0	0	0	1	1
0	1	1	0	0	0	0	0	0	0
1	1	1	0	1	0	1	1	1	1
0	0	0	0	1	0	0	0	0	0
0	0	1	0	1	0	1	0	0	0
0	0	0	1	0	1	1	0	0	1
0	0	1	0	1	1	1	1	0	0
1	0	1	1	0	1	1	0	0	1
0	0	0	0	0	0	0	1	0	0
0	0	0	0	0	0	1	1	1	1
0	0	0	0	0	0	0	0	1	0
1	0	1	0	0	1	1	0	0	1
0	1	1	0	0	0	0	0	0	1
0	1	0	1	1	0	0	0	1	0
1	0	0	0	0	1	0	1	0	0
1	0	0	0	0	0	0	0	1	0
0	1	0	0	1	1	0	1	0	0
1	1	1	1	0	0	0	0	0	0
0	1	1	0	0	1	1	0	1	0
0	0	0	0	0	0	0	0	0	0
0	0	0	0	1	1	0	1	1	0
1	0	0	0	0	0	0	0	0	1
0	0	0	0	0	1	1	0	1	0
0	1	0	0	1	0	0	1	0	0
0	0	1	0	1	0	0	0	0	0
0	1	0	0	0	0	1	1	0	0
0	0	1	1	0	0	1	0	0	0
0	1	1	1	0	0	0	1	0	0
1	0	1	0	0	1	1	0	0	1
0	0	0	0	1	0	0	1	1	1
0	0	0	0	1	1	0	0	0	0
0	1	0	1	0	1	1	0	0	1
0	0	1	1	0	0	1	0	1	1
0	0	1	0	0	0	1	0	0	0
0	0	0	1	1	0	0	0	0	0
1	0	0	1	0	0	1	0	0	1
0	0	0	1	1	0	0	0	0	1
0	1	0	0	0	0	0	0	0	1
0	0	0	0	0	0	0	0	0	0
1	0	0	0	0	1	0	1	0	0
0	0	0	0	0	0	0	0	0	1
0	0	0	0	0	0	1	0	0	1
0	0	1	0	1	0	0	0	1	0
0	0	0	0	1	0	0	0	0	0
0	0	0	0	0	1	0	0	1	0
0	0	0	0	0	1	0	1	0	0
1	0	0	0	0	1	0	0	1	0
0	0	0	1	1	1	0	0	0	0
1	1	0	1	1	0	0	1	1	0
1	0	0	0	0	1	0	0	0	0
0	0	0	0	1	1	0	0	0	0
1	0	0	1	0	0	0	0	1	0
0	1	0	1	0	0	1	1	1	0
0	1	1	1	0	0	0	0	0	0
0	1	0	1	0	0	1	0	0	1
0	0	0	0	0	0	0	1	0	0
0	1	0	0	0	0	0	0	0	1
0	0	0	0	0	0	0	0	1	1
0	0	1	0	1	1	1	0	1	1
0	0	0	0	0	1	0	0	0	0
0	0	0	1	0	0	0	1	0	0
0	0	0	1	0	0	0	0	1	0
0	0	0	0	0	0	0	0	0	0
0	1	0	1	1	0	0	0	0	0
1	1	0	1	0	0	1	0	0	0
0	0	0	1	0	1	0	0	0	0
0	0	0	0	0	0	0	1	0	1
1	1	0	0	0	0	0	0	1	0
1	0	0	0	0	0	1	0	1	0
1	0	1	0	0	0	0	0	0	0
0	1	1	0	1	0	0	0	0	0
0	0	1	0	0	0	0	0	1	0
1	0	0	0	0	1	1	1	1	0
0	1	0	1	0	0	0	0	0	1
1	0	0	1	1	0	0	0	1	1
0	1	0	1	1	0	0	1	0	1
1	0	0	0	1	1	0	0	0	0
1	0	0	0	1	0	1	1	1	0
0	0	1	0	0	0	0	0	1	0
1	0	0	1	0	1	1	1	1	1
0	0	0	0	1	0	0	0	0	1
0	1	0	1	1	1	1	1	0	0
1	0	0	0	0	0	1	0	0	1
0	0	0	0	1	0	1	0	0	0
0	0	0	0	1	1	0	0	0	0
0	0	0	1	1	0	0	1	0	0
1	1	0	0	0	1	0	0	0	1
1	1	0	1	0	0	0	1	0	0
0	0	0	0	1	0	0	1	0	0
0	0	0	0	0	0	0	0	0	0
1	0	1	0	0	0	0	1	0	0
0	0	0	0	0	1	1	0	0	0
0	1	0	1	1	0	0	1	1	0
0	0	1	1	0	0	0	0	0	0
0	0	1	0	0	0	1	0	0	1
0	0	0	0	0	0	0	0	1	0
1	1	0	1	0	0	0	1	1	1
0	0	0	0	0	1	0	1	1	1
0	0	0	1	0	0	1	0	1	0
0	0	1	0	1	0	1	1	1	1
0	1	1	1	0	0	0	0	1	0
0	0	0	0	1	0	0	0	0	1
1	0	0	0	0	0	0	0	0	0
1	0	1	0	1	0	0	0	0	1
0	1	0	0	0	0	1	1	1	1
1	0	0	0	0	0	1	0	1	0
0	0	0	0	0	0	0	0	0	1
0	0	1	0	1	0	0	0	0	1
0	0	0	0	0	0	1	0	0	0
0	1	1	0	0	0	0	0	0	1
0	0	0	0	0	0	0	1	0	0
0	0	0	0	0	1	1	0	0	0
1	1	0	1	0	0	0	0	1	1
0	0	0	0	0	0	1	0	1	0
0	1	1	1	1	1	0	0	0	0
0	0	1	1	0	1	0	0	1	0
0	0	1	0	0	0	0	0	0	0
0	0	0	1	0	0	0	0	1	1
0	0	1	1	1	0	0	0	0	0
0	0	0	0	0	0	1	0	0	1
0	1	0	1	1	1	1	0	1	0
0	0	0	0	0	0	0	0	0	1
0	0	0	1	0	0	1	0	1	1
0	0	0	1	0	1	0	0	1	0
0	0	1	1	0	0	0	1	0	0
0	1	0	0	0	0	0	1	1	0
0	0	0	1	0	0	0	0	0	1
0	0	1	1	0	1	1	0	0	0
0	0	1	1	1	0	0	0	0	0
1	0	0	0	0	0	0	0	0	0
1	0	1	0	1	0	0	0	0	0
1	0	0	0	1	0	0	1	0	1
1	0	0	0	0	0	0	1	1	0
0	0	0	1	0	0	1	0	0	0
0	0	1	1	0	0	1	0	0	1
0	0	0	0	0	1	0	1	1	0
1	0	1	0	1	0	0	0	1	0
0	1	0	0	1	0	0	0	0	1
0	0	1	1	1	1	0	0	0	1
0	0	0	0	0	0	0	0	1	1
0	0	0	1	1	0	0	0	1	0
0	0	0	0	1	0	0	0	1	1
1	0	0	0	0	1	0	1	0	1
0	1	0	0	0	0	0	0	0	0
1	1	0	0	0	1	0	0	1	0
1	0	0	1	0	0	1	1	0	0
0	1	1	0	0	0	1	0	0	1
1	0	0	0	1	0	1	1	0	1
0	0	0	1	1	1	1	0	1	0
0	0	0	0	1	0	1	1	0	0
1	0	1	1	1	1	0	0	0	1
0	0	0	0	0	0	0	1	0	1
0	0	0	0	0	1	0	0	0	0
0	0	0	0	1	0	0	0	1	0
1	0	1	0	1	1	0	0	1	1
0	1	1	1	1	1	0	0	1	1
0	0	1	1	1	0	0	0	0	0
1	0	0	0	1	0	0	1	1	1
1	1	0	1	0	0	0	0	0	0
1	1	1	0	1	0	0	0	0	0
1	1	0	0	0	0	1	0	0	0
1	0	0	0	0	1	0	0	0	0
1	1	1	0	0	1	1	0	0	0
0	1	0	0	1	0	0	0	0	0
1	0	0	1	0	1	0	0	1	0
1	0	1	1	1	0	0	0	0	0
0	1	0	1	1	1	0	1	0	0
0	1	0	0	0	0	0	1	0	0
0	0	1	0	1	1	0	0	1	1
0	0	1	0	0	0	0	0	1	0
0	0	0	0	0	0	0	1	0	1
1	0	1	0	0	1	0	0	0	1
1	0	0	0	0	0	1	0	0	0
1	0	1	0	1	1	0	1	0	0
0	1	0	0	1	1	0	0	0	0
0	0	1	1	0	1	0	0	0	0
0	1	0	1	1	0	1	0	0	0
0	0	1	0	0	0	1	1	0	0
0	0	0	1	0	0	0	0	0	0
1	0	0	0	0	1	1	1	1	0
1	0	0	0	0	0	0	1	0	0
0	0	0	0	0	0	0	0	0	1
0	1	0	0	0	0	1	1	0	0
1	0	0	0	0	1	0	0	0	1
0	0	0	1	1	0	0	0	0	1
0	0	0	1	0	0	1	1	0	0
0	1	0	0	0	0	0	0	0	0
0	0	0	0	0	1	0	1	0	0
0	0	0	0	0	0	0	0	0	0
0	0	0	0	0	0	0	0	1	1
0	1	0	0	1	1	0	0	0	0
0	1	0	0	0	0	0	1	0	0
0	1	1	0	0	0	1	1	1	0
0	0	1	0	1	0	0	0	1	1
0	0	0	0	0	0	1	1	1	0
0	1	1	0	1	0	0	0	0	1
1	1	1	1	0	0	1	1	1	0
0	0	1	0	0	0	0	0	0	0
1	1	0	1	1	0	1	0	0	0
1	1	0	0	0	0	1	0	1	0
0	0	0	0	1	1	0	0	1	1
0	0	0	0	1	0	0	1	0	1
0	0	0	0	0	0	0	0	0	0
0	1	1	0	1	0	0	0	0	0
0	0	0	0	1	1	1	0	0	0
1	1	1	0	1	0	1	1	0	0
0	1	1	0	0	0	1	1	0	0
1	0	0	0	1	1	1	0	0	0
0	0	0	0	0	0	1	1	0	1
1	0	0	0	1	1	1	1	1	0
0	0	1	0	0	0	0	0	0	0
1	0	0	0	1	0	0	0	0	0
0	0	0	0	1	1	1	0	0	0
0	0	0	0	1	0	0	1	0	0
1	0	0	1	0	0	0	1	0	0
1	1	0	0	1	0	1	0	1	0
0	1	0	0	0	0	1	0	1	0
0	0	1	1	1	0	1	0	0	0
1	0	0	0	0	0	0	0	0	0
0	1	0	0	0	1	1	1	0	0
1	0	1	0	0	0	0	1	0	1
0	0	1	0	1	1	0	1	0	0
1	0	0	1	0	0	0	1	0	0
1	0	0	0	0	0	0	0	0	1
0	0	0	0	1	1	0	0	0	0
1	0	1	0	0	0	1	0	1	0
0	0	1	1	0	0	0	0	0	0
0	0	0	0	0	0	0	0	1	0
0	0	0	0	0	0	1	1	0	1
0	0	1	0	1	0	1	0	1	1
0	0	1	0	1	0	0	0	0	1
0	0	1	0	0	0	0	1	0	0
0	0	0	0	0	1	0	1	0	0
0	0	1	0	0	1	0	1	0	1
0	0	0	1	1	1	0	0	0	0
0	0	1	0	0	0	0	0	0	1
0	0	0	1	1	0	0	1	0	1
0	0	0	0	0	1	0	0	0	0
0	0	1	0	0	1	1	0	0	0
0	0	0	0	0	0	0	0	1	1
0	0	1	1	0	0	0	1	0	0
0	0	0	0	0	0	0	0	1	1
0	0	1	0	1	0	0	0	0	1
1	1	0	0	0	1	0	0	1	0
0	0	0	0	1	0	0	0	0	0
0	1	1	0	0	0	0	0	0	1
0	1	0	0	0	1	0	1	0	0
0	1	0	1	1	0	0	0	0	0
0	0	0	1	0	0	0	0	0	0
0	0	1	0	1	0	0	0	0	0
0	1	1	1	0	1	1	0	0	0
1	0	0	1	0	0	1	1	0	1
1	1	1	1	1	0	1	0	0	0
0	1	0	0	0	0	0	1	0	0
1	0	0	1	1	1	0	0	0	0
0	1	0	0	0	0	0	0	0	1
0	0	0	1	0	0	1	0	0	0
0	0	0	1	1	1	0	0	0	0
0	0	0	1	1	0	0	0	1	1
0	0	0	1	0	0	0	0	0	0
0	1	0	1	1	0	0	0	0	0
0	0	1	0	0	0	1	0	0	0
0	0	0	1	0	0	0	0	0	0
0	0	0	0	0	1	0	0	1	0
0	0	1	1	0	1	0	0	1	0
1	1	0	1	0	0	0	0	1	0
0	0	0	1	0	0	0	1	0	0
1	0	0	0	0	0	0	1	0	0
1	0	0	1	0	0	0	0	0	0
0	1	0	0	0	1	0	0	0	1
0	0	0	0	0	0	1	1	0	0
0	0	1	1	0	0	0	1	1	1
0	0	0	0	1	0	0	0	1	1
0	1	1	1	0	0	0	1	0	0
0	1	1	1	1	1	0	0	1	0
0	1	1	0	0	0	0	0	0	1
0	1	0	1	1	0	0	0	0	0
0	1	0	1	0	0	0	0	1	0
1	1	1	1	0	0	1	0	0	1
0	1	1	0	1	1	1	0	0	0
0	0	0	0	0	1	0	0	1	1
0	0	1	1	1	0	0	0	0	0
0	0	1	1	1	0	0	0	1	1
0	1	0	1	0	0	0	1	0	0
1	1	0	0	1	0	1	0	1	0
0	1	1	1	0	0	0	0	0	1
0	1	0	0	0	0	0	0	0	1
0	0	1	0	0	0	0	0	0	0
1	1	0	0	1	1	1	0	1	0
0	1	1	0	1	0	0	1	0	1
0	1	0	0	1	0	0	0	0	1
0	1	0	1	0	1	0	0	0	0
1	0	0	1	0	1	0	0	1	0
1	0	0	0	0	0	1	1	0	0
1	0	1	0	1	1	0	0	1	0
0	0	0	0	0	1	0	0	0	0
0	0	1	0	0	1	0	0	0	1
1	0	1	1	0	0	0	0	0	0
0	1	0	0	1	0	1	1	1	1
1	1	0	1	1	1	0	0	0	0
1	1	0	0	0	0	0	0	1	1
1	1	1	0	0	0	1	0	1	0
1	0	0	1	0	0	1	0	0	0
0	0	1	0	1	1	0	1	0	0
0	0	0	0	1	0	0	1	0	0
1	1	0	0	0	1	0	0	0	0
0	0	0	0	0	0	0	1	0	1
1	1	1	0	1	0	0	0	0	0
0	1	0	0	1	0	0	0	1	1
0	0	1	0	0	0	1	1	0	0
0	0	0	0	1	1	0	1	0	0
0	1	0	1	0	1	0	1	0	1
1	0	1	0	0	1	0	0	1	0
0	0	1	0	0	1	0	0	0	1
0	0	0	1	1	0	0	0	0	1
0	1	0	0	1	0	1	0	0	1
0	1	0	0	0	0	0	1	0	0
1	0	0	0	0	0	0	0	0	1
1	1	0	0	0	0	0	0	1	1
0	0	0	0	0	0	1	0	1	1
0	0	0	0	1	1	0	0	0	1
0	1	0	1	1	1	0	0	0	0
0	0	0	1	1	1	1	1	0	1
1	0	0	1	0	0	0	0	0	0
0	0	0	0	1	0	0	0	1	1
0	0	0	0	0	0	1	0	0	0
0	0	0	0	0	1	1	1	0	0
0	0	0	1	0	0	0	1	1	1
0	0	0	1	1	1	0	0	0	0
0	0	0	0	1	0	0	0	0	0
0	0	0	1	0	0	0	0	0	0
0	0	1	0	1	0	1	1	0	1
0	1	0	1	0	0	0	0	0	0
0	0	1	0	1	0	1	0	0	1
0	1	1	1	0	0	0	0	0	1
0	0	1	0	1	0	0	0	0	0
0	1	0	1	0	1	1	1	0	0
0	1	0	0	0	0	0	1	0	0
0	1	0	1	0	0	0	0	1	0
0	1	0	0	1	0	0	0	0	0
0	0	1	0	0	0	1	0	1	0
0	0	0	0	0	0	0	0	0	0
1	1	0	0	0	0	0	0	1	0
1	1	0	0	0	0	0	0	0	0
0	1	0	1	0	0	1	0	0	0
1	0	0	1	0	0	0	1	0	0
1	0	1	0	1	0	1	0	1	1
1	0	0	1	1	0	1	1	1	0
1	1	0	1	0	0	1	0	1	0
0	1	1	1	1	1	0	0	0	0
0	0	1	1	0	0	0	1	1	1
0	0	0	0	0	0	0	0	0	0
1	1	1	1	0	1	0	0	0	0
0	0	0	0	1	0	0	0	0	0
0	0	0	0	0	0	0	0	0	0
0	1	1	0	1	1	0	0	1	0
0	0	0	0	1	0	0	0	0	0
0	0	1	0	0	0	1	0	1	1
0	1	0	1	1	0	1	0	1	1
1	1	1	0	0	0	0	1	0	0
0	0	0	0	1	0	0	0	1	0
0	0	1	0	1	0	0	0	0	0
1	0	0	1	0	0	0	0	1	0
0	1	1	0	1	1	0	0	1	1
1	0	0	0	0	0	0	0	0	1
0	0	0	0	0	0	0	0	1	1
1	0	0	1	0	0	0	0	1	1
0	1	0	1	0	0	0	0	0	1
1	0	0	0	0	0	0	1	0	0
0	0	0	0	1	0	0	1	1	0
0	1	1	0	1	1	0	0	0	1
1	1	0	0	1	0	0	0	0	0
0	0	1	0	0	1	1	1	0	0
0	0	0	0	1	1	0	0	0	0
0	0	0	1	0	0	0	0	0	1
0	0	1	0	0	0	0	0	0	0
0	0	1	1	1	0	1	0	0	0
1	0	1	1	0	0	0	0	1	0
1	1	1	0	0	0	1	0	1	1
1	1	0	0	1	0	0	0	0	1
1	1	0	0	0	1	1	0	0	0
0	0	1	0	0	0	1	1	0	0
1	1	1	1	1	0	0	0	1	1
0	0	1	0	0	0	0	0	0	0
0	1	0	0	0	0	0	0	0	0
1	0	1	1	0	0	0	0	0	0
1	0	0	0	0	1	0	0	1	0
0	0	0	0	0	1	0	0	1	0
0	0	0	0	0	0	0	1	1	0
1	0	1	0	0	0	0	0	0	0
0	0	0	1	0	1	0	1	0	0
1	0	0	0	0	1	1	0	0	1
1	0	0	0	0	0	0	0	1	0
1	0	0	0	0	0	0	0	0	0
1	0	0	1	0	1	1	0	0	0
0	0	0	1	0	0	0	0	0	1
0	0	0	1	1	0	0	0	0	0
1	0	0	0	0	1	1	1	0	0
0	0	0	1	0	0	1	0	0	0
0	0	1	1	0	1	0	1	1	0
1	1	1	0	0	0	0	0	0	0
0	0	0	0	0	0	1	1	0	0
0	0	0	0	1	0	0	1	0	0
0	0	1	0	0	0	0	0	0	0
0	0	0	0	0	0	1	0	0	0
1	1	1	0	0	1	1	1	0	1
1	0	0	0	1	0	0	0	1	1
0	0	0	1	0	0	1	1	0	1
0	0	1	1	0	0	0	0	0	0
0	0	0	1	0	1	0	0	0	0
0	0	0	0	1	0	0	1	1	1
0	1	0	1	0	0	0	0	1	0
1	1	0	1	0	1	0	1	0	0
0	0	0	1	0	0	0	1	0	0
0	0	0	0	0	0	0	1	0	0
1	1	0	0	0	0	0	0	0	0
1	1	1	0	0	0	1	0	0	1
1	1	0	1	0	0	1	1	0	1
0	0	0	1	0	0	1	0	0	0
0	0	0	0	0	0	1	0	0	0
0	0	1	0	1	1	0	0	0	0
1	1	0	0	0	1	0	0	0	0
0	1	1	0	1	1	0	1	1	1
1	0	0	1	1	0	0	1	0	0
1	1	0	0	1	0	1	0	0	1
0	0	0	1	0	1	0	1	0	0
1	0	0	0	0	0	0	0	0	0
0	0	1	0	1	0	0	1	0	0
1	1	0	0	1	0	1	0	1	0
0	0	1	0	0	1	0	1	0	1
1	0	0	0	0	0	1	1	0	0
1	1	0	1	1	1	0	1	1	0
0	1	0	0	1	1	0	0	1	1
0	1	0	1	0	0	1	0	0	0
0	1	0	1	1	0	1	0	0	1
0	0	0	0	0	0	1	1	0	0
0	0	1	0	1	0	0	0	0	0
1	0	0	0	0	0	0	1	0	0
1	0	0	0	0	0	0	0	1	0
1	1	0	0	0	0	0	0	1	0
0	0	0	0	1	0	0	0	0	0
0	0	0	0	0	0	0	0	1	0
1	1	0	0	0	0	0	1	0	0
1	1	0	1	1	0	1	0	0	0
1	0	1	0	0	0	1	0	1	1
0	0	0	0	1	0	0	1	0	0
1	0	0	1	0	0	0	1	0	0
1	0	0	1	0	1	0	0	0	0
1	0	1	0	0	0	1	1	0	0
0	0	1	0	0	0	0	0	0	0
0	0	0	0	0	0	0	1	0	0
1	0	0	0	1	0	0	0	0	0
0	0	0	0	0	1	1	0	1	1
1	1	0	0	0	0	1	0	1	1
0	1	0	0	0	1	0	1	1	1
1	1	0	0	1	0	1	0	1	0
1	0	0	0	1	1	0	0	1	0
0	0	1	0	0	0	1	0	0	0
0	0	0	1	1	0	0	0	1	1
0	0	0	0	1	1	0	0	0	0
0	0	0	0	1	0	0	0	0	1
1	0	0	0	0	0	1	0	0	1
1	1	1	0	0	0	0	0	0	1
0	0	0	0	0	1	1	1	0	0
0	0	0	1	0	0	0	0	1	0
1	0	0	0	1	1	1	1	1	1
0	1	0	1	1	1	1	1	0	1
0	0	0	0	0	1	0	1	0	0
0	0	1	0	0	0	1	1	1	0
0	1	0	0	0	1	0	1	0	0
0	0	1	0	0	1	1	0	0	0
0	0	0	0	1	1	1	0	1	1
0	0	0	0	0	1	1	0	0	1
1	1	1	0	0	0	0	0	0	0
1	0	0	1	0	0	0	0	1	1
0	0	0	0	1	0	1	0	0	1
0	0	0	0	0	0	0	0	1	0
1	0	0	0	0	0	0	0	0	1
0	0	0	0	0	1	0	0	1	0
1	0	0	0	0	0	0	1	0	0
0	0	1	0	1	0	1	0	0	0
0	0	1	0	1	1	0	0	0	0
0	0	0	0	1	1	0	1	0	0
0	0	0	0	1	0	0	0	1	0
0	0	0	0	1	1	0	0	1	1
0	0	1	0	1	0	0	0	1	0
1	0	0	1	1	1	1	0	1	1
1	0	1	1	1	0	0	0	0	0
0	0	0	1	1	0	1	0	0	0
1	0	0	0	0	0	0	0	1	0
0	0	0	1	0	0	1	1	0	0
0	1	0	0	0	1	0	0	0	0
1	0	1	0	0	0	0	1	0	0
0	0	0	0	0	1	0	0	0	0
0	0	0	0	0	0	0	1	0	0
0	1	0	0	0	0	1	0	0	1
0	1	1	1	0	0	0	0	1	0
0	0	0	1	0	1	0	1	1	1
0	1	0	0	0	1	0	0	0	1
1	0	1	1	0	0	0	0	0	0
0	0	0	0	0	0	0	0	0	0
0	0	0	0	0	0	0	0	0	0
0	0	0	0	0	1	0	1	0	0
0	1	0	0	0	1	1	0	0	0
0	1	0	0	1	0	0	0	0	0
1	1	1	0	1	1	1	1	1	1
1	0	1	0	0	0	0	0	0	0
0	0	0	0	0	0	0	0	1	0
1	0	1	0	0	1	1	1	0	0
0	0	0	0	1	0	0	0	1	0
0	0	0	0	0	1	1	1	0	1
0	0	1	0	0	0	0	1	1	1
0	0	0	0	0	1	0	0	0	0
0	1	1	0	0	0	1	0	1	0
0	0	1	0	0	0	0	0	0	0
0	0	0	0	1	0	0	0	1	1
0	0	0	0	1	0	0	1	0	0
0	0	0	0	1	0	0	0	0	0
0	0	1	0	1	0	0	1	1	0
0	0	0	0	0	1	1	0	0	0
0	1	0	0	1	0	0	0	0	0
0	0	0	0	0	0	0	1	0	0
1	0	0	0	0	0	1	0	0	1
0	1	0	1	0	1	1	0	0	1
0	0	0	1	0	0	1	0	1	0
0	1	0	1	0	0	0	0	0	0
0	0	0	0	1	1	1	0	0	1
0	0	0	1	0	0	1	0	0	0
1	0	0	0	1	0	1	0	1	1
0	0	0	0	0	0	1	0	1	0
0	0	0	0	0	0	0	0	1	0
0	0	0	0	0	0	0	1	1	1
0	1	0	0	0	1	1	0	0	0
0	0	0	0	0	1	0	0	1	1
0	0	0	1	1	0	0	0	0	1
0	1	0	0	0	0	1	1	0	0
1	0	0	0	0	0	1	1	0	0
0	0	1	1	0	0	1	0	1	0
0	0	0	0	1	1	0	0	0	0
1	1	1	0	0	1	1	1	0	0
0	0	0	1	1	0	0	0	0	0
1	0	0	0	0	0	0	0	0	1
1	0	0	0	0	1	0	0	1	0
0	0	0	1	0	1	1	0	1	0
0	0	0	0	1	0	1	0	1	0
1	0	1	0	1	1	1	0	0	0
0	0	0	0	0	0	0	0	0	0
1	1	0	1	0	0	1	0	0	0
0	0	0	0	0	0	0	0	1	0
0	0	0	1	0	0	0	1	0	1
0	1	1	0	0	0	0	0	1	1
1	1	1	1	0	1	0	0	0	0
1	1	0	0	0	0	1	1	1	1
0	0	0	0	0	0	0	0	0	0
0	0	1	1	0	0	0	0	0	0
1	0	0	1	1	1	0	0	0	1
1	1	0	1	0	1	1	1	1	0
0	0	1	0	0	0	1	0	0	0
0	0	0	0	0	1	0	1	0	0
0	1	1	1	0	1	0	0	1	0
0	1	0	0	0	0	0	1	0	1
0	0	0	1	1	1	1	0	0	0
0	0	0	1	0	1	1	0	0	0
0	0	1	0	0	1	0	1	0	0
0	1	1	0	0	1	1	1	1	1
0	0	0	0	0	0	0	1	0	0
0	0	1	1	1	1	1	0	1	1
1	0	0	1	0	0	0	0	1	1
1	1	0	1	0	0	0	0	1	0
0	0	0	0	0	0	0	1	0	0
0	0	0	1	1	1	1	0	0	1
0	0	0	0	0	0	1	1	0	1
0	0	0	1	0	0	1	1	1	0
0	0	0	0	0	1	0	0	1	0
0	0	0	0	0	0	1	1	1	1
0	0	0	0	0	1	1	1	1	0
0	0	0	1	0	0	0	1	0	0
0	0	1	0	0	0	0	1	1	0
0	0	0	0	0	1	1	0	1	0
1	0	0	0	0	0	0	0	0	0
1	0	0	0	1	0	0	0	1	0
0	0	0	1	0	1	0	0	1	1
0	0	1	0	0	0	0	0	1	0
0	0	1	0	0	1	0	0	0	1
1	0	1	0	0	0	0	0	1	0
0	1	1	0	1	0	1	0	0	0
1	0	0	1	1	0	1	0	1	0
1	1	1	1	1	1	0	1	1	0
1	0	0	0	0	1	1	1	0	0
0	0	1	0	0	1	1	1	0	0
0	1	0	0	0	1	0	1	0	0
1	1	0	0	0	1	1	0	0	0
0	0	0	0	1	1	0	0	0	0
0	0	0	0	0	1	0	0	0	1
1	0	0	1	0	0	0	0	0	0
0	1	0	1	0	1	0	0	1	1
1	1	1	0	0	0	0	0	0	0
1	0	0	0	1	1	0	0	0	0
0	1	0	1	0	0	0	0	0	0
0	0	0	0	0	0	1	0	0	0
1	0	1	0	1	1	1	1	0	0
0	0	0	1	0	0	0	0	0	0
1	0	1	1	0	1	0	0	1	0
0	1	0	0	1	0	0	0	0	0
0	0	0	1	1	1	1	0	0	0
0	0	1	0	1	1	0	0	1	1
0	1	0	1	1	0	1	1	0	0
0	1	1	1	0	0	0	1	0	1
1	0	0	0	0	0	0	1	1	0
1	0	1	0	1	0	1	1	1	0
1	0	0	0	0	0	0	0	0	1
0	0	0	0	0	0	0	0	0	0
1	1	0	0	0	0	0	0	0	1
0	0	0	0	0	0	0	0	0	1
1	0	1	0	0	1	1	0	0	0
0	1	1	0	0	0	1	1	1	0
1	1	0	0	1	0	0	1	0	0
0	0	0	0	1	0	0	0	1	0
1	0	0	0	1	0	0	1	0	0
0	0	1	0	1	1	0	0	0	0
0	0	0	1	0	0	1	1	0	0
1	0	0	0	0	0	0	0	1	0
0	0	0	1	0	0	1	1	1	0
0	1	0	0	0	1	0	0	0	0
0	0	0	0	0	0	0	0	1	0
0	1	0	1	1	0	0	1	1	0
0	0	0	1	1	1	0	0	1	0
0	0	0	0	1	1	1	0	1	0
0	0	0	0	0	0	1	0	0	0
0	0	0	0	0	1	0	0	0	1
1	0	0	1	0	1	0	0	0	0
1	0	1	0	1	0	0	1	1	0
1	1	0	0	1	1	0	0	0	0
0	0	0	0	1	0	0	0	0	0
0	0	0	0	0	0	0	0	0	1
1	0	1	0	0	1	1	1	0	0
0	0	1	1	1	0	1	1	0	0
1	0	1	0	0	0	0	0	0	0
0	1	0	0	0	0	0	0	0	0
1	0	0	0	0	0	1	1	0	0
1	1	0	0	0	0	1	0	0	0
1	1	1	0	1	1	0	1	0	0
0	0	0	0	0	0	0	1	0	1
0	0	0	0	0	1	1	0	0	0
1	1	0	0	1	1	0	0	0	0
1	1	1	0	1	0	0	0	0	0
0	0	1	0	1	0	0	0	1	0
1	0	0	0	0	1	0	0	0	0
0	0	0	0	0	0	1	0	0	0
0	0	0	1	0	1	0	0	0	1
0	1	1	0	0	0	1	0	0	0
1	0	1	0	0	1	0	0	1	1
0	0	0	1	0	1	1	0	0	0
1	0	0	0	0	0	1	0	1	0
1	0	1	1	0	0	1	0	0	0
0	0	0	0	1	1	1	0	1	0
0	0	0	0	0	0	0	1	1	0
0	1	0	0	0	0	0	1	0	0
1	0	0	0	0	1	1	1	1	0
0	0	0	0	0	1	0	0	1	0
0	1	0	0	0	1	0	1	0	0
0	0	1	1	0	1	0	1	0	0
0	0	1	0	1	0	1	0	1	0
1	0	0	0	0	0	0	0	1	0
0	1	0	1	0	0	0	1	0	0
0	0	0	1	1	0	0	0	0	0
0	0	1	0	0	0	0	1	1	1
0	1	0	1	0	1	1	0	0	0
1	0	1	0	0	0	1	0	0	0
0	0	1	0	1	1	1	0	1	0
0	0	0	0	0	0	1	0	0	0
0	0	0	1	1	1	0	0	0	0
1	0	0	0	0	0	0	0	0	1
1	1	0	1	1	0	1	0	0	1
1	0	0	0	0	0	0	0	0	0
0	0	0	0	0	0	1	0	0	0
0	0	0	0	0	0	1	0	0	0
0	0	0	1	1	0	0	0	0	1
0	1	0	0	0	0	1	0	1	0
1	0	0	0	0	0	0	0	1	0
1	0	0	0	1	0	1	0	0	0
0	0	1	0	0	0	0	0	0	0
1	0	1	1	0	1	0	0	0	1
1	0	0	0	1	1	0	0	1	0
1	1	0	0	0	0	0	0	1	0
0	0	1	1	0	0	0	1	1	0
0	0	1	0	1	1	0	0	0	0
0	0	0	0	0	1	1	0	0	0
0	0	0	0	0	1	0	0	0	1
1	0	1	0	0	1	0	0	0	0
0	0	0	0	0	0	0	0	0	1
0	0	0	0	0	0	1	1	0	1
0	1	1	1	0	0	0	1	0	0
0	0	0	1	0	1	0	1	0	0
0	1	0	0	0	0	0	1	1	0
1	1	0	0	1	0	0	0	0	0
0	1	1	0	0	1	0	0	0	0
0	0	0	0	0	1	0	0	0	0
0	0	1	0	0	1	0	0	1	0
0	0	0	1	1	1	0	0	1	0
0	0	0	0	0	1	0	1	0	0
0	1	0	0	1	0	0	0	1	0
0	0	0	0	0	0	1	0	0	0
0	0	0	0	1	1	0	0	0	0
1	0	0	0	0	0	1	1	0	0
0	0	0	0	0	0	0	1	0	0
0	0	0	0	0	0	0	0	0	0
0	1	0	1	0	0	1	1	0	0
1	0	1	0	0	1	0	0	0	0
0	1	1	1	1	0	0	0	0	1
0	0	0	1	0	0	1	0	0	1
0	1	1	0	1	0	0	0	0	0
0	1	0	1	1	0	1	0	1	0
0	0	0	0	0	0	1	1	1	0
0	0	0	0	0	0	0	0	0	0
0	0	1	1	1	0	0	0	1	0
0	0	0	0	0	0	0	0	0	0
0	1	0	1	0	0	0	0	1	0
0	0	1	0	1	0	1	0	0	0
0	1	0	0	0	0	0	0	0	0
1	0	0	1	1	0	1	1	0	0
0	1	0	0	0	1	0	0	1	0
1	1	1	0	1	0	0	1	1	0
0	0	1	1	0	0	0	0	1	0
1	0	0	0	0	1	1	0	1	0
0	0	0	0	1	0	0	1	1	0
1	1	1	0	1	0	0	0	0	0
0	1	0	0	0	0	1	0	0	0
1	0	0	0	1	0	1	0	0	0
0	1	0	1	0	0	0	0	0	0
0	0	1	0	0	0	0	0	0	0
0	1	0	0	0	0	1	1	1	0
0	0	0	1	1	0	0	0	1	0
1	0	0	1	0	0	0	0	0	1
0	0	0	0	0	1	0	1	0	1
1	0	0	0	0	1	0	0	1	1
0	1	0	0	0	1	1	0	1	1
0	0	0	0	0	1	1	0	0	1
0	1	0	1	1	1	0	0	1	0
1	1	0	0	1	0	1	0	1	1
1	0	0	0	0	0	0	0	0	0
1	0	0	0	0	0	0	0	1	0
0	1	0	0	1	0	0	0	0	0
0	1	0	0	0	0	1	1	0	1
0	0	0	0	0	1	1	0	1	0
1	0	1	0	0	0	0	1	1	0
1	0	0	1	0	1	0	0	0	0
0	0	1	0	0	1	0	1	0	0
1	0	1	1	0	1	1	0	1	0
1	0	0	0	0	1	0	0	1	0
0	0	0	1	1	0	0	0	1	0
0	0	0	0	0	0	1	0	0	0
1	1	0	0	0	0	1	0	1	1
1	0	1	0	0	0	0	1	1	0
1	0	1	0	1	0	1	1	0	0
1	1	0	1	0	1	1	0	1	0
1	0	1	1	0	1	0	1	0	0
1	0	0	1	0	0	0	0	0	1
0	0	0	0	1	0	0	0	0	1
1	0	0	1	0	0	0	0	1	0
0	0	0	0	0	1	1	0	0	0
0	0	0	0	1	1	1	0	1	0
1	0	0	0	1	0	0	0	1	0
0	0	0	1	1	0	0	0	0	0
1	1	0	1	0	1	0	0	0	0
0	0	0	0	1	0	0	0	0	0
0	1	1	0	1	0	0	1	1	0
0	0	0	0	1	0	0	0	1	0
0	1	0	0	0	0	0	1	1	0
0	0	0	0	1	1	0	0	1	0
1	0	1	0	0	1	0	0	0	0
0	0	0	1	0	0	0	1	1	1
0	0	0	0	0	0	1	0	0	1
0	0	0	0	1	1	1	0	1	0
1	0	0	0	0	1	1	0	0	0
0	0	1	0	0	1	0	1	1	0
1	0	0	1	0	0	0	0	0	1
0	0	0	0	0	1	0	1	0	0
0	0	1	0	0	1	0	0	0	1
0	1	1	0	1	0	0	0	1	1
1	0	0	0	0	1	0	1	0	0
1	1	0	1	0	0	1	0	1	0
0	1	0	0	0	1	0	0	0	0
0	0	0	0	0	0	0	0	0	1
0	1	0	1	0	1	0	0	0	0
1	0	1	1	1	0	0	0	0	1
0	0	1	1	0	0	0	0	1	0
0	1	1	0	0	0	0	0	0	0
0	0	0	0	0	0	1	0	1	0
0	0	0	0	0	0	1	1	0	0
0	0	0	0	0	0	1	0	0	0
1	0	0	0	0	1	0	1	0	0
0	1	1	0	1	1	0	0	0	0
0	0	0	1	1	0	0	0	0	0
0	1	0	1	0	0	0	1	0	0
0	0	0	1	0	1	0	1	1	1
0	1	0	1	1	0	0	0	1	1
1	0	1	1	0	0	1	0	1	0
1	0	0	0	0	1	0	0	0	0
0	1	0	0	1	1	1	1	0	1
0	1	0	0	0	0	0	0	0	1
0	0	1	0	0	0	0	0	0	1
0	1	1	0	0	0	1	1	0	1
1	0	1	0	0	1	0	0	0	0
0	0	0	0	0	1	0	0	0	0
0	0	0	0	0	0	0	1	0	0
0	0	1	0	1	0	0	0	1	0
0	0	0	1	0	0	0	0	0	0
0	0	0	0	0	1	1	0	0	0
0	0	0	1	0	1	1	0	0	0
1	0	0	0	0	0	1	0	1	0
0	0	0	0	0	1	0	0	0	1
1	0	0	1	0	1	0	0	0	0
0	0	0	0	0	0	1	0	1	0
0	0	0	1	1	0	0	0	0	0
0	0	1	0	0	1	0	0	1	1
0	0	1	0	1	0	0	0	0	0
0	0	1	0	0	0	1	0	0	0
0	1	0	0	0	1	1	0	0	0
0	1	0	1	0	0	1	0	1	0
0	0	0	0	1	0	0	1	1	0
0	1	0	0	0	0	0	0	0	1
0	1	0	1	0	0	0	0	0	0
1	1	0	0	0	0	1	1	0	0
0	0	0	0	0	1	1	0	0	1
0	0	1	0	1	0	0	0	0	0
0	0	0	0	0	0	1	1	0	0
0	1	1	0	0	0	1	0	0	1
1	0	0	0	0	0	0	0	0	0
1	0	0	1	1	0	0	0	0	0
0	0	0	0	0	0	0	0	0	0
1	1	0	1	0	0	0	0	0	0
1	0	0	0	0	1	1	0	0	1
1	0	0	0	0	1	1	1	0	1
1	0	0	0	1	0	0	1	1	1
0	0	1	0	0	0	0	1	0	0
0	0	0	0	0	0	0	0	0	0
1	0	1	0	0	0	0	0	1	0
0	1	0	0	0	0	0	0	0	1
0	1	0	0	0	0	0	0	0	1
1	1	0	0	0	0	1	0	1	0
0	0	0	1	0	0	1	1	0	0
0	0	0	0	0	1	1	0	1	1
0	0	1	1	1	0	0	0	0	0
0	0	1	0	1	1	0	0	1	0

## Sheet: qlearn
1	0	0	0	0	0	0	0	0	0
0	0	0	0	0	0	0	0	0	0
0	0	0	0	0	0	0	0	0	0
0	0	0	0	0	0	0	0	0	0
0	1	0	0	0	1	0	0	0	0
0	0	1	0	1	0	0	0	0	0
0	0	0	1	0	0	0	0	0	1
0	1	0	0	0	1	0	0	0	0
0	1	0	0	0	1	0	1	0	0
0	0	0	0	0	0	0	0	0	0
0	0	0	0	0	0	1	1	0	0
0	0	0	0	0	1	0	0	0	0
0	0	0	0	0	0	1	0	0	0
0	0	0	0	0	1	0	0	0	0
0	0	0	0	0	0	1	0	0	0
0	0	0	0	0	0	0	0	0	0
0	0	0	0	1	0	0	0	0	0
0	0	1	0	0	1	0	0	0	0
0	0	0	0	0	0	0	0	1	0
0	0	0	0	0	0	0	0	0	0
0	0	0	1	0	0	0	0	0	0
1	0	1	0	0	0	0	1	0	0
0	0	0	0	1	0	0	0	1	0
0	1	0	1	0	0	0	0	0	0
0	0	0	0	0	0	1	1	0	0
0	0	1	0	0	0	0	0	0	0
0	1	0	0	0	0	1	0	0	0
0	1	1	1	0	1	0	0	0	0
0	0	0	0	0	1	0	0	0	0
0	0	1	0	0	0	1	0	0	1
0	1	0	0	0	1	1	0	0	0
0	0	1	0	1	0	0	0	0	0
1	0	0	0	0	0	0	0	0	0
0	0	0	1	1	0	0	0	0	0
0	0	0	1	1	0	1	0	0	0
0	0	0	1	0	0	0	1	0	0
0	0	0	1	1	0	0	1	0	0
0	0	1	1	0	0	0	0	0	0
0	0	1	0	0	0	0	0	0	0
0	0	0	0	1	0	0	1	0	0
1	1	0	0	0	0	0	0	0	1
0	1	0	0	0	0	1	0	0	0
1	0	0	0	0	0	0	1	0	1
0	0	0	0	0	0	0	0	0	0
0	0	0	1	0	0	0	0	0	0
0	0	0	0	1	1	0	1	0	0
0	0	0	0	0	0	0	0	0	0
0	0	0	0	0	1	0	0	0	0
0	0	0	0	0	1	0	0	0	0
0	1	0	0	0	0	1	0	0	0
0	1	0	0	0	0	0	0	0	0
1	0	1	0	0	1	1	0	0	0
0	1	0	0	0	0	0	0	1	0
0	0	0	0	0	1	0	0	0	0
0	0	0	0	0	1	1	0	0	1
0	0	0	1	0	1	0	0	0	1
0	0	0	0	1	0	1	0	1	0
0	0	0	0	1	0	0	0	0	0
1	0	1	0	1	0	0	0	0	0
0	0	0	0	1	0	0	0	0	0
0	0	0	0	1	0	0	0	0	0
0	0	0	0	1	0	1	0	0	0
0	0	0	1	0	0	1	0	0	0
0	0	0	0	0	0	1	0	0	1
0	0	0	0	0	0	0	0	0	0
0	0	0	0	0	0	0	0	1	0
0	1	0	0	0	0	1	0	0	0
0	0	1	0	0	0	0	0	0	0
1	0	1	0	1	0	0	0	0	0
0	0	0	0	0	0	0	1	0	0
0	0	0	0	0	0	1	0	0	0
0	0	0	0	1	0	1	0	0	0
0	0	0	0	0	1	0	1	0	1
1	0	0	0	1	0	0	0	0	0
0	0	0	1	0	0	0	0	0	1
1	0	0	0	1	1	0	1	0	0
0	0	0	0	0	0	1	0	0	0
0	0	0	0	0	0	0	0	0	0
0	0	0	0	0	0	1	0	0	0
1	0	0	0	0	0	0	0	0	0
0	1	0	0	0	0	0	0	0	1
1	0	0	0	0	1	1	0	0	0
0	0	0	0	0	0	1	0	1	0
0	0	0	0	1	0	0	1	0	1
1	0	0	1	0	0	0	0	0	0
1	0	0	0	0	0	1	0	0	0
0	0	0	0	0	0	0	0	0	0
0	0	0	0	0	0	0	0	0	0
0	0	0	0	0	0	1	1	0	0
1	1	1	0	0	1	0	0	0	0
0	0	0	1	0	0	0	0	0	1
0	0	1	0	0	0	1	0	0	1
1	0	0	0	0	1	0	0	0	0
0	0	0	0	0	1	1	0	0	0
0	0	0	0	0	0	0	0	0	0
1	0	0	1	0	0	0	1	0	1
0	0	0	0	0	0	0	0	0	0
0	0	0	0	1	0	0	0	0	0
1	0	0	0	0	0	0	0	0	0
1	0	0	0	0	0	1	0	0	0
1	1	0	0	0	0	1	0	0	0
0	0	0	0	1	1	0	0	1	0
0	0	0	0	1	1	1	0	0	0
0	0	1	0	1	1	0	0	0	0
0	0	0	0	0	1	1	1	0	1
0	0	1	0	1	1	0	1	0	0
1	0	1	0	0	0	1	1	0	0
0	1	0	1	0	0	0	0	0	0
0	0	0	1	0	0	0	1	0	0
1	0	0	0	0	1	0	1	1	1
0	0	1	1	0	0	0	1	0	0
0	0	0	0	0	1	0	0	0	0
0	1	0	0	1	1	0	0	1	0
0	0	0	0	0	0	0	1	0	1
0	0	0	0	0	0	0	1	0	0
0	0	0	0	0	0	0	0	0	0
0	0	0	1	0	0	0	0	0	0
1	1	0	0	0	0	0	0	1	0
0	0	0	0	0	0	1	0	0	0
0	1	0	0	0	0	0	0	0	0
0	0	0	0	0	0	1	1	0	0
1	0	0	0	1	0	0	0	0	1
0	0	1	0	1	0	0	1	0	1
0	1	0	0	1	1	0	0	0	0
1	0	1	1	0	0	0	1	0	1
0	0	0	0	0	0	0	0	0	0
0	0	0	1	0	0	0	0	0	0
0	0	0	0	0	0	1	0	0	0
0	0	1	0	1	0	0	0	0	0
0	0	1	1	0	0	0	0	0	0
0	1	1	0	0	1	0	1	0	0
0	0	0	0	0	1	0	0	0	0
0	0	0	1	1	0	0	0	1	1
1	0	0	0	0	0	0	0	0	0
0	0	1	0	0	0	0	1	0	0
0	0	0	0	0	0	0	0	0	0
0	0	1	0	0	1	0	0	0	0
0	0	0	0	0	0	0	0	0	0
0	1	0	0	0	0	1	0	0	1
0	0	1	0	0	1	0	0	0	0
0	0	0	0	0	0	0	0	0	0
0	0	0	1	0	0	1	0	1	0
0	0	0	1	1	0	0	1	0	0
0	0	0	0	0	0	0	1	1	0
1	0	1	0	0	0	0	1	0	0
1	0	0	0	0	0	0	0	0	0
0	0	0	0	0	0	1	0	0	0
0	1	0	1	0	0	1	0	0	0
0	0	1	0	0	1	0	0	0	1
0	1	0	0	1	0	0	0	0	0
0	0	0	1	0	0	0	0	0	1
0	0	1	0	0	0	1	0	1	0
0	0	1	0	0	0	0	1	0	0
0	1	1	0	0	0	0	0	0	1
0	1	0	0	1	0	1	0	0	0
0	1	0	0	1	0	0	1	0	0
0	0	0	1	0	0	1	1	0	0
0	0	1	0	0	0	0	0	0	0
0	1	1	0	1	0	1	0	0	0
1	1	1	0	0	0	0	0	0	0
1	1	0	0	0	0	0	0	0	0
0	0	0	0	0	0	0	0	1	0
0	0	0	1	1	0	1	1	0	0
1	0	0	0	1	1	0	0	0	0
0	0	1	0	0	0	1	0	0	0
1	1	0	0	0	0	0	1	1	0
0	0	1	1	0	0	0	0	0	0
0	1	0	0	0	1	0	0	0	0
0	0	0	0	0	0	0	1	0	0
1	1	0	0	0	1	0	0	0	0
0	0	1	0	0	0	1	0	0	0
1	0	0	0	1	0	0	0	0	0
0	1	0	1	0	0	0	1	0	0
0	1	1	0	0	0	0	0	0	0
0	1	0	0	0	0	0	0	0	0
1	0	0	0	0	0	0	0	0	1
0	0	0	0	0	0	1	1	0	0
0	1	0	0	0	0	1	0	0	1
1	0	0	1	0	0	0	0	1	0
0	0	0	0	0	0	0	0	0	0
0	0	1	0	0	0	0	0	1	0
0	1	0	1	1	1	1	0	1	0
0	1	0	1	1	0	0	0	0	0
1	0	0	0	0	0	0	0	0	0
0	1	0	0	1	0	0	0	0	0
0	0	1	0	0	0	0	1	0	1
1	0	0	0	0	0	0	0	0	0
1	0	0	0	0	0	0	0	1	1
0	0	1	1	0	0	0	0	0	0
1	1	0	0	1	0	1	0	0	1
0	0	0	0	1	1	0	0	1	0
0	0	0	0	0	0	0	1	0	0
1	0	0	1	0	0	0	0	0	0
0	1	1	0	0	0	0	0	0	0
0	0	0	0	0	1	0	0	0	0
0	0	0	1	0	0	0	0	0	0
0	1	0	0	0	0	1	0	0	0
0	0	0	1	0	0	0	1	0	0
0	0	0	1	0	0	0	0	0	0
1	1	0	0	0	0	1	0	0	1
1	0	0	1	0	1	0	1	0	0
0	0	1	0	0	0	0	0	0	0
1	0	0	0	0	0	0	0	1	0
0	0	0	0	0	0	1	1	0	0
0	0	0	0	0	1	1	0	0	0
0	0	1	0	1	1	0	0	0	0
0	0	1	1	1	0	1	1	0	1
0	1	0	0	1	0	0	0	0	0
0	0	1	0	0	0	0	0	0	0
0	0	1	0	0	0	0	0	0	0
0	0	0	0	0	0	0	0	0	0
1	0	0	0	0	1	0	0	0	0
0	0	0	0	1	0	0	0	1	0
0	0	0	0	1	1	0	0	0	0
0	0	0	0	0	1	0	0	0	0
1	0	0	1	0	0	1	0	0	1
0	0	0	0	0	1	0	0	0	0
0	0	0	0	0	0	0	0	1	0
0	0	0	0	0	0	0	1	0	1
0	1	0	0	1	0	0	0	0	1
0	1	0	0	0	0	0	1	0	1
0	0	1	0	0	0	0	0	0	0
1	0	0	1	0	1	0	0	0	0
0	0	0	1	0	0	0	0	0	1
0	0	1	0	1	0	1	1	0	0
1	0	0	0	0	0	1	0	1	1
0	0	1	0	1	0	0	1	0	0
0	0	1	1	1	1	0	0	1	1
0	0	1	0	1	0	0	0	0	0
1	0	0	0	0	0	0	0	0	0
0	0	0	1	1	0	0	0	0	0
1	1	1	0	0	0	0	0	0	1
0	0	0	0	0	0	0	0	0	1
0	0	1	0	0	0	0	0	0	1
0	0	0	0	0	0	0	0	0	1
0	0	0	0	0	0	1	0	0	0
0	0	0	0	0	0	0	0	0	0
0	1	0	0	0	0	1	0	0	0
1	1	0	0	0	1	0	0	0	0
1	0	0	0	0	0	0	0	0	1
1	0	1	0	0	1	0	1	0	0
0	0	0	1	0	0	0	0	1	1
0	0	0	1	0	0	0	1	1	1
0	0	0	0	0	1	1	0	0	1
0	0	0	0	0	0	1	0	1	0
1	1	0	0	0	0	0	0	0	0
1	0	0	1	0	0	0	0	0	0
0	1	1	0	0	0	0	0	0	0
1	0	1	0	0	0	0	1	1	0
0	0	1	0	0	0	0	0	0	0
1	0	0	1	0	0	0	1	0	0
0	0	0	0	1	0	0	0	0	0
0	0	0	1	0	1	0	1	0	0
0	0	1	0	0	0	0	1	0	1
0	0	0	0	0	0	0	0	0	1
1	0	0	0	0	1	0	0	0	0
0	0	1	1	0	0	0	0	0	1
0	0	1	0	0	0	1	0	0	0
1	0	0	0	0	1	0	0	0	0
0	0	0	0	0	1	1	0	1	0
0	0	0	0	0	0	0	0	0	0
0	0	0	0	0	0	1	0	0	0
1	1	0	0	0	0	1	0	0	0
0	1	0	0	0	0	0	0	0	0
0	0	0	1	0	0	0	0	1	1
0	1	0	0	0	0	0	0	0	0
1	1	0	0	1	1	0	0	1	0
0	0	1	1	1	0	0	0	0	0
1	0	0	0	0	0	1	1	0	0
0	0	1	0	0	0	0	0	1	0
0	0	0	0	1	0	0	0	0	0
0	1	0	1	0	0	0	0	1	0
0	1	0	0	0	0	1	1	1	1
1	0	0	1	0	0	0	0	0	1
1	0	0	1	0	0	0	1	1	0
1	0	0	0	0	1	0	0	0	0
0	0	0	1	0	0	0	1	0	0
0	0	0	0	0	1	0	0	0	0
0	0	0	0	0	1	0	1	0	1
0	0	0	0	0	0	0	0	0	0
0	0	0	0	0	0	0	0	0	0
0	0	1	1	0	0	0	0	0	0
0	0	0	0	0	0	0	0	0	1
0	0	0	0	1	0	0	0	0	1
0	0	0	0	0	1	0	1	1	1
0	0	0	1	0	0	0	0	0	0
0	0	0	0	0	0	0	0	0	1
0	0	0	0	0	0	0	0	0	1
0	1	1	0	0	1	0	0	0	1
0	0	0	1	0	0	0	0	1	0
0	0	0	0	0	1	0	0	1	0
1	0	1	1	0	0	0	1	0	0
0	0	0	0	0	0	0	0	0	1
0	0	1	0	1	0	0	0	0	0
0	0	1	0	0	0	1	0	0	0
0	0	1	1	0	0	0	1	0	0
1	1	0	0	1	0	1	0	1	0
0	0	1	0	0	0	0	0	0	0
1	0	0	0	0	0	0	0	0	1
0	1	1	0	0	0	0	1	0	0
0	0	1	0	0	0	0	0	0	0
0	1	1	1	0	0	0	1	0	1
0	1	0	0	0	0	1	0	0	0
0	1	1	0	0	0	1	0	1	0
0	0	0	0	1	0	0	0	0	0
0	0	0	0	0	0	0	0	0	0
0	0	0	1	1	1	0	0	0	0
0	1	0	0	0	0	1	1	0	1
0	0	1	0	0	0	0	0	0	1
1	0	1	0	1	0	0	0	0	0
0	1	1	0	0	0	0	1	0	1
1	1	0	0	1	0	1	0	1	0
0	1	0	0	0	1	0	1	0	0
0	1	0	0	1	0	0	1	0	0
0	1	0	1	0	0	0	0	0	1
1	0	0	0	0	0	0	0	0	0
0	0	1	0	0	0	0	0	0	0
1	0	1	0	1	0	0	0	1	0
1	0	1	1	0	0	1	0	1	0
0	0	0	0	0	0	0	0	0	1
0	0	0	0	0	1	0	0	1	0
0	0	1	0	1	0	1	0	0	0
0	1	0	1	0	1	1	1	1	0
0	1	1	0	0	1	0	0	0	0
0	0	0	0	0	1	1	0	0	0
1	0	0	0	0	0	1	1	0	0
0	0	0	0	0	0	1	0	0	0
0	0	0	1	1	0	0	0	1	0
1	0	1	0	0	0	0	0	0	1
0	0	0	1	0	1	0	0	0	0
0	1	0	0	0	1	1	1	0	0
1	0	0	0	0	0	1	0	0	0
0	0	0	0	1	1	1	0	1	0
1	0	1	0	0	0	0	0	0	0
0	0	0	0	0	0	0	0	0	0
0	0	0	1	0	1	0	0	1	0
0	0	1	1	1	1	0	0	0	0
0	0	0	0	1	0	1	0	0	0
0	0	1	0	0	0	1	0	0	0
0	0	0	1	0	0	0	0	1	1
0	0	1	0	0	0	0	0	0	1
0	0	0	0	0	0	1	0	0	0
0	0	0	0	0	0	0	0	1	0
0	0	0	0	1	1	1	0	0	0
0	0	0	0	0	1	1	1	0	0
0	0	0	1	1	0	1	0	0	0
0	0	0	0	0	0	0	0	0	0
1	0	0	0	0	0	0	0	0	0
0	0	0	1	1	0	1	0	1	1
0	0	0	0	1	0	0	0	0	0
0	0	0	0	0	0	1	0	1	0
1	0	0	0	0	0	0	1	0	0
0	1	0	0	1	0	1	0	0	0
0	0	0	1	0	0	0	0	0	0
1	0	0	1	1	0	0	1	0	0
0	0	0	0	0	0	0	1	0	0
0	0	1	0	0	1	0	1	0	1
0	0	0	0	0	0	1	0	0	0
1	0	0	0	0	1	0	0	0	0
1	1	0	0	0	0	1	0	0	0
0	0	0	0	0	0	0	0	1	0
0	0	1	1	1	0	0	0	0	0
1	1	0	1	0	0	0	0	0	0
1	1	0	0	0	0	0	0	0	0
1	0	1	0	0	1	0	0	0	1
0	0	0	0	0	0	0	0	1	0
0	0	0	0	0	1	0	0	0	1
0	0	1	0	1	0	0	0	0	1
1	0	0	0	1	0	0	0	0	0
0	1	0	0	0	0	0	0	0	0
0	0	0	0	0	0	0	0	0	0
0	0	1	1	0	0	0	0	1	0
0	0	0	0	0	0	0	0	1	1
0	0	0	0	1	0	1	0	1	0
0	0	0	0	1	0	0	1	1	0
0	0	0	0	0	0	0	0	0	1
0	1	0	0	0	0	0	0	0	0
0	0	0	0	1	0	0	0	0	0
1	0	0	0	0	0	0	0	0	0
1	0	0	0	0	0	0	0	0	0
0	0	0	1	0	0	0	0	0	0
1	0	0	0	0	1	0	0	0	0
0	0	0	0	0	1	0	0	0	0
0	0	1	0	1	0	0	0	0	1
0	0	0	0	0	0	0	0	0	0
1	1	0	1	0	1	0	1	0	1
1	0	1	0	0	0	1	1	0	1
0	1	0	1	0	0	1	0	0	0
0	0	0	0	1	1	0	0	0	0
0	0	1	1	0	0	1	0	0	0
1	0	1	0	0	0	0	0	0	0
1	0	0	1	0	0	1	0	1	0
0	0	0	0	0	0	0	0	1	0
0	0	0	0	1	1	0	0	0	0
0	0	0	1	0	0	1	0	0	0
0	1	0	1	0	1	0	0	0	0
0	0	1	0	0	0	0	0	0	1
0	0	0	0	0	0	0	0	0	1
0	0	0	0	1	0	0	0	0	0
1	0	0	0	0	0	0	0	0	0
0	1	0	0	0	0	0	0	0	1
1	0	1	1	0	0	0	0	0	0
0	0	0	0	0	0	0	0	1	0
0	0	0	0	1	1	0	0	0	1
0	0	0	0	1	0	0	0	0	0
0	0	0	1	0	0	1	0	0	0
1	0	0	1	0	0	0	0	0	0
1	0	0	0	0	1	0	1	0	0
0	0	0	0	0	0	1	0	1	0
0	0	0	0	0	1	0	0	0	0
0	0	0	0	0	1	0	0	0	0
0	1	0	0	0	1	0	1	0	0
0	0	0	1	0	0	0	1	0	0
0	1	1	0	1	0	0	0	0	0
0	1	0	1	0	1	0	0	0	0
0	1	0	0	0	1	0	0	0	1
0	1	0	0	0	0	0	0	0	0
0	1	1	0	0	0	0	0	1	1
1	1	1	0	0	1	0	0	1	1
0	0	1	0	0	0	0	0	1	0
0	0	0	0	0	1	1	0	0	0
0	1	1	0	0	0	0	0	1	0
0	0	0	1	1	0	1	0	1	0
0	0	1	1	0	1	0	0	0	0
1	0	0	0	0	1	0	0	1	1
0	0	0	0	0	0	0	0	1	0
1	0	0	0	0	0	0	0	0	0
1	0	0	0	0	0	0	0	0	0
0	0	0	1	0	0	0	1	0	0
0	1	0	0	0	0	0	0	0	1
1	0	1	0	0	1	0	0	1	0
1	0	0	0	0	1	0	1	1	0
0	0	0	0	0	1	1	0	0	0
0	0	0	0	0	0	0	0	0	1
0	0	0	0	0	0	1	0	0	0
0	0	0	0	0	0	0	1	0	0
0	0	0	0	0	0	1	1	1	1
1	0	0	0	1	0	0	0	0	1
1	1	1	0	0	1	0	0	0	0
0	1	1	0	1	0	0	1	0	1
1	1	0	0	0	0	1	0	1	0
1	1	0	0	0	0	1	0	0	0
0	0	0	0	0	0	1	0	1	0
0	0	0	1	0	0	1	1	0	0
0	0	0	0	1	1	0	0	0	1
0	0	0	1	0	0	1	1	0	0
0	1	1	0	0	0	0	0	0	0
1	1	0	1	1	0	0	0	1	0
0	0	0	0	1	1	1	0	0	0
1	0	0	0	0	1	0	1	0	1
0	0	0	1	0	1	0	0	0	0
0	0	0	0	0	1	0	1	1	1
0	0	0	0	0	1	1	0	0	0
0	1	1	0	0	1	0	0	1	0
1	0	0	1	0	0	1	0	1	0
1	0	0	1	0	0	0	1	0	0
0	0	0	0	1	0	0	1	0	0
1	0	0	0	0	1	0	0	1	0
0	0	1	0	1	0	0	1	1	1
0	1	0	0	0	1	1	0	0	0
0	0	1	1	0	1	0	0	0	0
0	0	0	0	0	0	1	0	0	0
0	1	0	0	1	1	0	0	0	0
1	0	0	0	1	0	0	0	0	1
0	0	0	0	0	0	1	0	0	1
0	1	1	0	0	0	0	1	0	0
0	0	0	0	1	1	1	0	0	0
0	0	0	1	0	0	0	0	0	0
0	1	0	1	1	1	0	1	1	0
0	0	0	1	0	1	0	0	1	1
0	0	1	1	1	0	0	1	0	1
0	0	0	1	0	0	0	0	1	0
1	0	0	0	1	0	0	0	0	1
0	0	0	0	1	1	0	0	0	1
0	0	1	0	0	0	0	0	0	1
0	0	1	0	1	0	0	0	0	1
0	0	1	0	1	0	1	1	1	0
0	0	0	0	0	1	0	0	1	1
0	1	1	0	0	0	0	1	0	0
0	0	0	0	0	1	0	0	0	1
0	0	0	0	0	1	0	1	0	1
0	0	0	0	1	0	1	1	0	0
0	0	0	0	0	0	1	0	0	1
1	0	0	1	0	0	0	0	0	0
0	0	0	1	1	1	1	0	0	0
1	1	1	1	0	0	0	0	0	0
0	0	0	0	0	0	0	0	0	0
0	0	0	0	0	0	0	0	0	0
0	1	1	0	0	1	0	0	1	1
0	1	0	1	1	1	0	1	0	0
0	0	0	0	0	1	0	1	1	0
1	0	1	0	0	0	1	0	0	0
1	0	0	0	0	0	0	0	0	0
0	0	0	0	1	0	1	0	0	1
0	0	0	0	0	0	0	0	1	0
1	0	1	0	1	0	0	1	1	0
0	0	0	1	0	0	0	0	0	0
0	1	0	0	0	0	0	0	0	0
0	0	1	0	0	0	1	1	0	0
0	0	0	1	0	0	0	0	1	0
0	1	1	1	0	1	1	0	0	0
0	0	0	0	0	0	0	0	0	0
0	0	0	0	0	0	1	1	0	0
0	0	0	1	0	0	0	1	1	1
1	1	1	0	1	1	1	1	0	0
0	1	0	0	0	0	0	1	0	1
1	0	0	1	0	0	0	0	0	0
0	1	0	1	0	1	1	0	0	1
0	1	1	0	0	0	0	0	0	1
1	0	0	1	0	0	1	0	0	1
0	0	1	1	1	0	0	0	0	0
0	1	1	0	0	0	1	0	0	0
0	0	1	0	0	0	0	1	0	0
0	0	0	1	0	1	0	0	1	0
1	0	0	0	0	0	0	0	0	0
0	1	0	0	0	0	0	0	1	0
1	0	0	0	0	0	1	0	1	0
0	0	0	0	0	1	0	0	0	0
0	1	0	0	0	1	0	0	0	0
1	1	0	0	0	0	1	0	1	1
1	0	0	0	0	0	0	1	0	0
0	0	1	1	1	0	0	0	0	0
0	0	1	0	0	1	1	0	0	1
0	0	1	0	0	1	0	1	0	0
1	0	0	0	1	1	0	0	0	0
0	1	1	0	0	0	0	1	1	0
0	0	1	1	0	0	1	0	1	1
0	1	0	0	0	0	0	0	1	0
0	0	1	0	0	1	0	0	1	0
0	0	1	0	0	0	1	0	0	0
0	0	0	0	1	0	0	0	0	0
0	0	0	0	0	0	0	0	0	0
0	0	0	0	0	0	0	0	0	0
0	0	0	0	0	0	1	0	0	1
0	0	0	0	0	0	0	0	0	0
1	1	0	0	1	0	0	1	0	0
1	1	0	0	1	0	0	1	1	1
1	0	0	1	0	1	0	0	0	0
0	0	1	0	1	1	0	1	0	1
0	1	1	0	0	0	1	0	1	1
0	1	0	0	0	0	0	0	0	0
0	1	0	0	1	1	0	0	0	1
1	0	0	1	0	0	1	1	0	1
0	0	0	0	0	0	0	0	0	0
0	0	0	0	1	0	0	1	0	0
1	1	0	0	0	1	0	0	0	0
0	0	1	0	1	0	0	1	1	0
0	0	0	1	0	0	0	1	0	0
0	0	0	0	0	0	0	0	0	1
0	0	0	0	0	1	0	0	0	0
0	1	0	0	0	0	1	0	0	0
0	0	0	0	1	0	0	0	0	0
0	0	1	1	1	0	0	0	0	1
0	1	0	0	1	0	0	0	0	0
0	0	0	0	1	0	0	0	1	0
0	0	0	1	0	0	1	0	0	0
0	1	0	1	0	1	0	0	0	0
0	0	0	0	0	0	0	1	0	0
1	0	0	0	0	1	0	0	0	1
0	0	1	0	0	0	0	0	0	0
0	0	0	1	0	0	0	0	0	0
1	0	0	0	0	0	0	0	0	1
0	0	0	1	0	0	0	0	1	0
0	0	0	0	0	1	0	0	0	0
0	0	0	0	0	1	0	0	0	1
0	0	0	1	0	0	1	0	0	1
0	1	0	0	0	0	0	1	0	0
0	0	0	0	0	1	1	0	0	0
1	1	0	0	1	1	1	0	0	0
0	0	1	0	1	0	0	0	0	1
1	0	0	0	0	0	0	0	0	0
0	1	0	0	0	0	1	1	0	1
0	1	0	0	0	0	0	0	1	0
0	0	0	0	0	0	0	0	1	1
0	1	0	0	0	0	0	0	1	1
0	0	0	0	0	1	1	0	1	0
1	0	0	0	1	0	1	0	0	0
0	0	0	1	1	0	0	0	1	0
0	0	0	1	0	0	0	0	0	0
1	1	1	0	0	1	1	0	0	0
0	0	0	0	0	0	0	0	0	0
0	0	1	1	0	1	0	1	1	0
1	0	0	0	1	0	0	0	0	0
0	0	1	1	1	0	1	0	0	0
0	1	0	0	1	0	1	0	0	1
1	0	0	0	0	0	0	0	1	0
0	1	1	0	0	0	0	0	0	0
0	0	0	0	0	0	0	1	0	0
0	0	1	0	0	0	0	0	1	0
1	0	0	1	0	0	0	0	0	0
0	1	0	1	0	0	1	1	0	0
0	0	0	0	0	0	1	1	1	0
1	1	1	0	0	0	0	0	0	0
0	1	0	0	0	0	1	0	0	1
0	0	1	0	1	0	1	0	1	0
0	0	0	1	0	0	0	0	0	1
0	0	1	0	0	0	0	1	1	0
0	0	1	0	0	0	1	1	0	0
0	0	1	1	1	0	0	1	0	0
1	0	0	0	0	0	1	1	1	0
0	0	1	1	1	0	0	1	1	0
1	0	0	0	0	0	0	0	1	0
0	0	0	1	1	1	0	0	0	1
0	0	0	0	0	0	1	0	0	0
1	0	0	0	0	0	0	0	0	0
0	1	0	0	0	0	0	0	0	1
0	0	0	0	1	1	1	0	1	1
0	1	1	0	1	1	0	0	0	0
0	0	1	1	0	0	1	0	0	0
1	1	0	0	1	0	1	0	1	0
0	0	0	1	0	1	0	0	1	0
1	1	1	0	0	0	0	0	1	0
0	1	0	1	0	0	0	1	0	1
0	0	1	0	0	0	0	1	1	1
0	1	0	0	1	1	0	0	0	0
0	1	0	0	1	0	0	0	1	0
1	1	0	0	0	0	0	0	0	1
1	0	0	0	0	0	0	0	0	1
0	0	0	0	0	1	0	0	0	1
0	0	0	0	0	0	0	0	0	0
1	0	0	1	1	0	1	0	0	0
1	0	0	0	0	0	1	0	1	1
0	0	0	0	0	0	0	0	0	0
1	0	0	0	0	0	1	0	0	0
0	0	0	0	1	1	0	0	1	1
0	0	0	0	0	0	0	1	0	1
0	1	1	0	0	0	0	1	0	0
1	0	1	0	0	0	1	0	0	1
1	0	1	1	1	0	1	1	0	1
0	0	0	0	0	0	0	1	0	0
0	1	1	0	0	1	0	0	0	1
0	0	1	1	0	0	1	0	0	0
0	0	1	0	0	0	0	1	0	0
0	1	0	0	0	0	1	0	0	0
0	1	0	1	1	1	0	0	0	0
0	0	0	0	1	0	0	0	0	0
1	0	1	0	0	1	0	1	0	0
0	0	0	1	0	0	0	0	1	0
0	1	0	0	0	0	0	1	0	0
0	0	0	1	0	1	0	0	0	0
1	0	0	1	0	1	0	0	0	0
0	0	0	1	0	0	0	1	0	0
0	0	0	0	0	0	0	0	0	0
1	1	0	0	0	0	0	1	0	0
0	0	1	1	0	0	0	0	0	0
0	0	0	0	1	0	1	1	1	0
0	0	0	0	0	0	0	1	0	0
1	1	0	1	0	0	0	0	0	1
0	1	1	0	1	1	0	1	0	0
0	0	0	0	1	0	0	0	0	1
1	0	1	0	0	1	0	0	0	1
0	0	1	0	0	0	1	1	0	0
1	1	0	0	0	1	1	0	1	1
0	0	0	0	0	0	1	0	1	0
1	1	0	1	0	1	1	1	0	0
0	1	0	0	0	0	1	0	1	1
0	0	0	0	0	0	0	0	1	0
0	0	0	0	0	0	0	0	0	0
0	0	1	0	0	0	0	0	0	0
0	0	1	0	0	1	1	0	0	0
0	1	0	0	0	1	1	1	0	1
0	1	1	0	0	1	1	0	0	0
1	1	0	0	0	0	1	0	0	1
1	0	0	0	1	0	0	0	0	0
0	0	0	0	0	1	0	0	0	0
0	0	0	0	1	0	0	1	1	0
1	1	1	0	0	0	0	0	1	0
0	0	0	0	1	0	0	0	0	0
0	0	0	0	0	0	0	1	0	0
0	1	0	0	0	1	1	1	0	0
1	1	0	1	0	0	0	0	0	0
0	0	0	0	1	0	0	1	1	0
0	0	0	0	0	0	0	0	0	1
0	0	0	0	1	0	1	0	0	1
0	1	0	0	0	0	0	0	0	1
0	1	0	0	0	0	1	0	0	0
0	1	0	0	0	0	0	0	0	0
0	0	0	0	0	1	0	1	0	1
0	0	1	0	1	0	0	0	1	0
1	1	1	0	0	1	1	0	1	0
1	0	0	0	0	0	1	1	0	0
1	0	0	0	1	0	0	0	0	0
1	1	0	0	1	0	1	0	0	1
0	1	1	0	0	0	0	0	0	0
0	0	0	0	1	0	0	0	0	0
0	0	0	0	0	0	0	0	0	1
0	0	0	1	1	0	0	0	0	0
0	0	0	0	0	0	0	1	1	1
0	0	0	0	0	0	0	1	1	0
0	1	0	1	0	0	1	0	0	1
1	1	0	0	0	0	0	0	0	0
1	1	0	0	1	0	0	0	0	1
0	0	0	1	0	0	0	1	0	0
1	0	1	1	0	0	0	0	0	0
1	0	0	0	0	0	1	1	1	0
1	0	0	0	0	0	1	0	0	1
0	0	0	0	1	1	0	1	1	1
0	0	0	0	1	0	0	1	1	0
0	0	1	1	1	0	0	0	0	0
1	0	0	1	0	1	0	0	0	0
0	0	1	1	1	1	0	0	1	0
0	0	0	0	0	0	1	1	0	0
0	0	0	1	0	0	0	1	0	0
0	0	0	0	0	0	0	0	0	0
1	0	0	0	0	0	1	0	0	0
0	0	0	1	0	0	0	0	0	0
0	0	0	0	0	0	0	1	0	0
0	0	1	0	1	0	1	0	1	0
0	0	0	0	0	0	0	0	1	0
1	1	0	0	1	0	0	0	0	1
1	1	1	0	0	0	0	1	1	0
0	0	0	0	0	1	0	0	0	0
1	1	1	0	0	1	1	1	0	0
0	0	0	0	0	1	0	0	0	0
1	0	1	0	0	1	0	0	0	0
0	0	1	0	0	0	0	0	0	0
0	1	1	0	1	0	0	0	0	1
0	0	0	0	1	0	0	0	0	0
0	0	0	0	0	0	1	0	0	0
0	0	0	0	0	0	0	0	1	0
1	1	0	0	1	0	0	0	0	0
0	1	0	0	1	0	0	0	1	0
0	0	0	0	0	0	0	0	0	1
0	1	0	1	0	0	1	0	0	0
0	0	0	1	0	0	0	0	0	0
1	1	0	0	0	0	0	0	0	0
1	0	0	1	0	0	0	0	1	1
1	0	1	0	0	0	0	0	0	0
0	0	0	0	0	1	0	0	1	0
1	0	0	0	0	1	1	0	0	0
0	1	0	0	0	0	0	0	0	0
1	1	0	0	0	0	1	0	0	0
1	0	0	0	0	0	0	1	0	0
1	1	0	0	0	0	0	0	0	1
0	0	0	0	0	0	0	0	0	0
1	1	0	0	0	1	0	1	1	0
0	0	0	0	0	0	0	0	0	0
1	0	0	1	0	0	0	0	1	0
0	0	0	0	1	0	0	0	0	0
0	0	1	0	1	0	1	0	1	0
0	0	0	0	0	0	0	0	1	0
0	0	0	1	0	0	1	0	1	1
0	1	0	1	1	1	0	0	0	1
0	1	1	1	1	0	0	1	0	0
0	0	0	0	0	0	1	0	0	0
1	0	0	0	1	0	0	0	0	0
1	0	1	0	0	0	0	1	1	0
0	1	0	0	0	0	0	1	1	0
1	0	1	0	0	0	0	0	0	1
0	0	1	0	0	0	1	0	1	0
0	1	0	0	0	1	0	0	0	0
0	0	0	0	0	0	0	0	0	0
0	1	0	1	0	1	1	0	0	0
0	0	0	0	1	0	1	1	1	0
1	1	0	0	0	0	0	0	0	0
0	0	1	1	0	1	1	1	1	0
0	1	1	1	0	1	1	0	0	0
0	0	1	0	0	0	0	0	0	0
0	1	0	0	0	0	0	0	0	0
1	1	0	0	0	0	0	0	0	1
1	1	0	1	0	1	0	0	0	0
1	0	0	1	0	0	0	1	0	0
0	0	0	0	1	0	1	1	0	1
0	0	1	0	1	0	0	0	0	0
0	0	0	0	0	0	1	0	0	0
0	0	0	0	1	0	0	0	0	0
1	1	0	0	0	0	0	1	0	0
0	0	0	0	0	0	0	1	1	0
1	1	0	0	0	1	0	0	1	0
1	0	0	1	0	0	0	0	0	0
0	0	0	0	0	0	0	1	1	1
0	0	0	1	0	0	1	1	0	1
0	0	0	0	1	0	0	1	0	0
0	0	0	0	0	0	1	0	0	0
1	1	0	0	1	0	0	0	1	1
0	0	0	0	0	0	1	0	0	0
0	0	0	0	0	1	1	0	1	0
0	0	0	0	0	0	0	1	0	0
0	0	1	0	0	1	1	0	1	0
1	0	1	0	1	0	0	0	1	1
0	1	0	0	0	0	0	0	0	0
0	0	1	1	0	1	0	0	0	0
1	0	0	0	0	0	0	1	0	0
1	0	0	0	1	0	0	0	0	1
0	1	1	0	0	1	0	1	0	0
0	0	1	0	1	0	1	0	0	0
1	0	1	0	1	0	0	0	0	0
0	0	0	0	1	0	1	1	0	1
0	0	1	0	1	1	0	0	1	0
1	0	0	0	0	1	0	0	1	0
0	0	0	1	1	0	0	0	0	0
0	0	0	0	0	0	0	0	0	1
0	0	1	0	0	0	1	1	1	0
1	0	0	1	1	0	0	1	0	0
0	1	1	0	1	1	0	0	0	0
1	1	1	1	0	0	0	0	0	0
0	0	1	0	0	0	0	1	0	0
0	1	0	0	0	0	0	0	0	0
0	0	0	1	1	0	0	0	1	0
0	0	0	0	0	0	0	1	0	1
0	0	0	0	0	1	0	0	0	0
1	0	0	0	0	1	1	1	0	1
0	0	0	0	0	0	0	0	0	0
0	0	0	1	1	0	0	0	1	0
0	0	0	0	0	0	0	0	0	0
1	1	0	1	0	0	0	0	1	1
1	0	0	0	0	0	0	0	0	0
0	0	0	0	0	0	0	0	0	1
0	0	0	1	0	0	0	0	0	0
1	0	0	1	0	0	0	0	0	0
0	1	0	1	0	0	0	0	0	0
0	0	0	0	0	0	0	1	0	1
0	0	0	0	0	0	0	0	0	0
0	0	1	1	0	0	0	0	0	0
1	0	0	0	0	0	0	0	0	1
1	0	0	0	0	0	1	1	0	0
1	1	0	1	0	1	0	0	0	0
1	1	0	0	0	0	0	1	0	0
0	0	0	1	0	1	0	1	1	1
0	0	1	0	0	1	0	0	0	1
1	0	1	0	0	0	0	0	1	1
0	0	0	0	0	0	1	0	0	0
0	0	0	0	0	1	0	1	0	0
0	0	1	0	0	0	0	0	1	0
1	1	1	0	0	0	0	0	0	0
0	1	0	0	0	1	0	1	1	1
1	0	0	0	0	0	1	0	0	0
0	0	0	1	0	0	1	1	0	0
1	1	1	0	0	0	0	1	0	1
0	0	0	0	0	0	0	0	0	0
0	0	1	1	0	1	0	0	1	0
0	0	0	0	0	0	1	1	0	0
0	0	0	1	1	1	1	1	1	0
0	1	0	0	0	1	0	0	0	0
0	0	0	0	0	0	0	1	0	0
1	1	0	0	0	1	0	0	1	0
1	0	1	0	0	0	0	1	0	0
0	0	0	1	0	1	0	1	0	0
1	0	0	1	0	0	0	0	0	0
0	1	0	0	0	0	0	0	1	0
0	1	0	0	1	0	1	0	0	0
0	0	0	1	1	0	1	1	0	1
0	0	0	1	1	1	0	0	1	0
0	0	1	0	1	0	0	0	0	0
0	0	0	0	0	0	0	0	0	0
0	0	0	0	0	0	0	0	1	0
0	0	0	0	0	0	0	0	0	0
0	0	0	0	0	0	0	0	1	0
1	0	1	0	0	0	1	0	1	0
0	0	0	1	1	1	0	0	0	0
0	1	0	0	1	0	0	0	1	0
0	0	0	0	1	0	0	0	1	1
0	0	0	0	0	1	0	0	0	1
0	0	0	0	0	0	1	1	0	0
0	1	0	0	0	1	0	1	0	1
1	1	0	1	0	0	0	1	0	0
0	1	0	0	0	0	0	0	0	0
0	0	0	0	0	0	0	0	1	1
0	0	0	0	0	1	0	1	0	0
0	0	0	1	0	0	0	1	0	0
0	1	0	0	0	0	1	0	0	1
0	1	0	0	0	1	0	0	0	0
1	1	1	0	0	0	1	0	1	0
0	0	0	1	0	0	1	0	0	0
0	1	0	0	0	1	0	0	1	1
0	1	0	0	1	1	0	0	1	0
1	0	1	0	0	1	1	1	1	0
0	0	0	1	0	0	0	0	0	0
0	0	0	0	0	0	0	0	0	0
0	0	0	0	0	0	0	0	1	0
0	1	1	1	0	0	1	1	1	0
0	0	1	0	0	1	0	1	1	1
0	1	0	0	0	0	0	0	0	0
0	1	0	0	0	0	0	0	0	0
0	0	0	0	0	0	0	0	1	0
1	0	0	0	1	0	0	0	0	1
0	1	0	0	0	1	0	0	0	0
0	0	0	0	0	0	0	0	1	0
1	0	0	1	0	0	0	1	0	0
0	1	1	0	0	0	0	1	0	0
0	0	0	0	0	0	0	1	0	0
0	0	0	0	1	0	0	0	0	0
0	0	0	0	0	1	0	0	0	1
0	0	0	0	0	0	0	0	0	0
0	0	1	0	0	1	1	1	0	0
0	0	0	0	0	0	0	0	0	0
1	0	1	0	0	1	0	1	1	0
1	0	1	1	1	0	1	0	0	1
1	1	0	1	0	1	0	0	1	0
0	0	1	0	0	1	1	0	0	0
0	1	0	0	0	0	0	0	0	0
0	1	1	0	0	0	0	0	0	0
0	1	1	1	0	0	0	1	0	0
0	0	0	1	0	0	0	0	0	0
1	1	0	0	1	0	1	0	1	0
0	0	0	0	1	0	0	1	0	0
1	1	0	0	0	0	0	1	0	0
0	1	0	0	0	0	0	0	0	0
1	0	1	0	1	0	0	1	1	1
0	0	0	0	1	0	0	0	0	0
1	1	0	0	0	0	0	0	0	1
0	1	1	1	0	0	1	0	0	0
0	0	0	0	1	1	1	0	0	0
0	0	0	0	1	1	0	1	0	0
0	1	0	0	1	1	0	0	1	0
0	0	0	1	0	0	1	1	0	0
0	0	0	0	0	0	1	0	1	1
0	1	0	0	0	1	0	0	0	0
0	0	0	0	1	0	0	0	0	1
0	0	1	1	1	0	1	0	0	1
0	0	0	1	0	0	0	0	1	0
0	0	0	0	1	0	0	0	0	0
1	0	0	0	0	0	0	0	0	0
0	0	0	0	0	0	0	0	0	0
1	1	0	1	0	0	1	0	0	0
0	0	1	0	0	0	0	0	1	1
0	0	0	0	0	0	0	0	0	0
1	0	0	0	1	0	0	1	1	1
0	0	0	1	0	0	0	0	0	1
0	0	1	0	1	0	0	0	0	0
0	0	1	0	0	0	0	0	0	1
0	1	0	0	0	0	1	0	0	0
0	0	0	0	1	0	0	1	0	0
0	1	0	0	0	0	0	1	0	0
1	0	0	0	0	0	1	1	0	0
0	1	0	0	1	0	0	0	0	0
0	0	0	0	1	0	1	0	0	0
1	0	1	0	1	0	1	1	1	0
0	1	0	0	0	0	0	0	0	0
0	1	0	0	0	0	0	0	0	0
0	0	1	0	0	0	1	1	0	0
0	0	0	0	0	1	0	1	0	0
0	1	0	0	1	0	0	0	0	0
0	0	0	0	1	0	1	0	1	0
0	0	0	1	0	0	1	1	0	0
0	1	0	0	0	1	0	0	0	0
0	1	1	1	0	0	0	1	0	1
0	0	0	0	0	0	0	0	1	1
0	0	0	0	0	1	0	0	0	0
0	0	1	1	0	0	0	0	0	0
0	1	0	0	0	1	1	0	1	0
0	0	0	0	0	0	1	1	0	0
1	0	0	0	1	0	0	1	0	0
0	0	0	1	0	0	0	0	0	0
0	0	0	1	0	1	0	0	0	1
0	0	0	0	0	0	1	1	0	1
0	1	1	0	0	0	0	0	1	1
1	0	0	1	0	0	0	1	0	1
0	0	0	0	0	1	0	1	1	0
1	1	0	0	0	1	0	0	0	0
0	0	0	1	0	1	0	0	1	1
0	1	1	0	0	0	0	0	0	0
0	0	0	0	0	1	1	0	1	0
1	0	0	0	1	0	1	0	1	0
0	0	1	1	0	0	1	0	0	1
0	0	0	0	0	0	0	1	0	0
1	1	0	1	0	1	0	1	1	0
0	0	0	0	1	1	0	0	0	1
0	1	0	0	0	0	0	0	1	0
1	0	1	1	0	0	0	0	0	1
0	0	0	0	0	1	0	0	0	1
0	0	0	0	1	0	0	0	0	0
1	0	1	1	0	0	0	0	1	0
1	0	0	0	1	0	0	0	0	0
0	0	0	0	1	1	0	1	0	0
1	0	0	0	0	1	0	0	0	0
0	0	1	1	1	1	0	0	0	1
1	0	1	0	0	0	1	0	0	0
1	0	1	1	1	0	1	0	1	0
0	0	0	0	1	0	0	1	0	0
0	0	0	0	0	0	1	1	0	0
0	0	1	0	0	1	0	0	0	1
0	1	1	0	0	0	0	0	0	0
1	0	0	0	0	1	0	1	0	0
0	0	1	0	0	0	0	1	0	0
0	1	0	0	0	0	1	1	0	0
0	0	0	0	1	0	0	0	0	0
0	0	0	1	0	0	0	1	1	0
0	0	0	0	0	0	1	0	0	0
0	0	0	0	0	0	0	0	1	0
1	0	0	1	0	0	1	1	0	0
0	1	1	1	1	0	0	1	0	0
0	0	0	0	0	0	1	0	0	0
0	0	1	0	0	0	0	0	0	0
0	0	1	0	0	1	1	0	0	0
0	1	0	0	0	0	0	0	0	1
0	0	1	0	1	0	1	0	0	1
0	0	0	1	0	0	0	0	1	0
1	0	0	0	0	0	1	1	0	0
0	0	0	0	0	1	0	1	1	0
0	1	0	0	0	0	1	0	0	0
0	0	0	0	1	1	0	0	0	0
1	0	1	0	0	1	0	0	0	0
1	0	0	0	0	0	0	0	0	1
0	0	0	0	0	1	0	1	1	0
0	0	0	1	0	0	1	0	0	1
0	0	0	1	1	0	0	1	0	1
1	0	0	0	0	1	0	1	0	1
0	0	0	0	0	0	1	0	0	0
0	0	1	0	0	0	0	0	0	1

## Sheet: together
steps	25th	50th	75th	25th	50th	75th	25th	50th	75th
400	0	0	0	0	0	0	0	0	0
800	0	0	0	0	0	0	0	0	0
1200	0	0	0	0	0	0	0	0	0
1600	0	0	0	0	0	0	0	0	0
2000	0	0	0	0	0	0	0	0	0
2400	0	0	0	0	0	0	0	0	0
2800	0	0	0	0	0	0	0	0	0
3200	0	0	0	0	0	0	0	0	0
3600	0	0	0	0	0	0.75	0	0	0
4000	0	0	0	0	0	0	0	0	0
4400	0	0	0	0	0	0	0	0	0
4800	0	0	0	0	0	0	0	0	0
5200	0	0	0	0	0	0	0	0	0
5600	0	0	0	0	0	0	0	0	0
6000	0	0	0	0	0	0	0	0	0
6400	0	0	0	0	0	0	0	0	0
6800	0	0	0	0	0	0	0	0	0
7200	0	0	0	0	0	0	0	0	0
7600	0	0	0	0	0	0	0	0	0
8000	0	0	0	0	0	0	0	0	0
8400	0	0	0	0	0	0	0	0	0
8800	0	0	0	0	0	0.75	0	0	0
9200	0	0	0	0	0	0	0	0	0
9600	0	0	0	0	0	0	0	0	0
10000	0	0	0	0	0	0	0	0	0
10400	0	0	0	0	0	0	0	0	0
10800	0	0	0	0	0	0	0	0	0
11200	0	0	0	0	0	1	0	0	0
11600	0	0	0	0	0	0	0	0	0
12000	0	0	0	0	0	0.75	0	0	0
12400	0	0	0	0	0	0.75	0	0.5	1
12800	0	0	0	0	0	0	0	0	0
13200	0	0	0	0	0	0	0	0	0
13600	0	0	0	0	0	0	0	0	0
14000	0	0	0	0	0	0.75	0	0	0
14400	0	0	0	0	0	0	0	0	0
14800	0	0	0	0	0	0.75	0	0	0
15200	0	0	0	0	0	0	0	0	1
15600	0	0	0	0	0	0	0	0	1
16000	0	0	0	0	0	0	0	0	0
16400	0	0	0	0	0	0.75	0	0	0
16800	0	0	0	0	0	0	0	0	0
17200	0	0	0	0	0	0.75	0	0	0
17600	0	0	0	0	0	0	0	0	0
18000	0	0	0	0	0	0	0	0	0.75
18400	0	0	0	0	0	0.75	0	0	1
18800	0	0	0	0	0	0	0	0	1
19200	0	0	0	0	0	0	0	0	0
19600	0	0	0	0	0	0	0	0	0
20000	0	0	0	0	0	0	0	0	1
20400	0	0	0	0	0	0	0	0	0
20800	0	0	0	0	0	1	0	0	0
21200	0	0	0	0	0	0	0	0	0
21600	0	0	0	0	0	0	0	0	0
22000	0	0	0	0	0	0.75	0	0	0
22400	0	0	0	0	0	0.75	0	0	0
22800	0	0	0	0	0	0.75	0	0	0
23200	0	0	0	0	0	0	0	0	0.75
23600	0	0	0	0	0	0.75	0	0.5	1
24000	0	0	0	0	0	0	0	0	1
24400	0	0	0	0	0	0	0	0	0
24800	0	0	0	0	0	0	0	0	0
25200	0	0	0	0	0	0	0	0	0
25600	0	0	0	0	0	0	0	0	0
26000	0	0	0	0	0	0	0	0.5	1
26400	0	0	0	0	0	0	0	0	0.75
26800	0	0	0	0	0	0	0	0	0
27200	0	0	0	0	0	0	0	0	1
27600	0	0	0	0	0	0.75	0	0	1
28000	0	0	0	0	0	0	0	0	0
28400	0	0	0	0	0	0	0	0	0
28800	0	0	0	0	0	0	0	1	1
29200	0	0	0	0	0	0.75	0	0	0
29600	0	0	0	0	0	0	0	0	0
30000	0	0	0	0	0	0	0	0	1
30400	0	0	0	0	0	1	0	0	1
30800	0	0	0	0	0	0	0	0	0
31200	0	0	0	0	0	0	0	0	1
31600	0	0	0	0	0	0	0	0.5	1
32000	0	0	0	0	0	0	0	0	1
32400	0	0	0	0	0	0	0	0	0.75
32800	0	0	0	0	0	0.75	0	0	0.75
33200	0	0	0	0	0	0	0	0	0.75
33600	0	0	0	0	0	0.75	0	0	0.75
34000	0	0	0	0	0	0	0	0	0
34400	0	0	0	0	0	0	0	0	1
34800	0	0	0	0	0	0	0	0	0
35200	0	0	0	0	0	0	0	0	0
35600	0	0	0	0	0	0	0	0	0
36000	0	0	0	0	0	1	0	0.5	1
36400	0	0	0	0	0	0	0	0	0.75
36800	0	0	0	0	0	0.75	0	0	0
37200	0	0	0	0	0	0	0	0	0.75
37600	0	0	0	0	0	0	0	0	0.75
38000	0	0	0	0	0	0	0	0	1
38400	0	0	0	0	0	1	0	0	1
38800	0	0	0	0	0	0	0	0	0.75
39200	0	0	0	0	0	0	0	0	0.75
39600	0	0	0	0	0	0	0	0	0
40000	0	0	0	0	0	0	0	0	0
40400	0	0	0	0	0	0.75	0	0.5	1
40800	0	0	0	0	0	0.75	0	0	1
41200	0	0	0	0	0	0.75	0	0.5	1
41600	0	0	0	0	0	0.75	0	0	0.75
42000	0	0	0.75	0	0	1	0	0	0.75
42400	0	0	0	0	0	1	0	0	1
42800	0	0	0.75	0	0	1	0	1	1
43200	0	0	0	0	0	0	0	0	0
43600	0	0	0	0	0	0	0	0	1
44000	0	0	0	0	0.5	1	0	0	1
44400	0	0	0	0	0	0.75	0	0	0
44800	0	0	0	0	0	0	0	0	1
45200	0	0	0	0	0	1	0	0	0.75
45600	0	0	0.75	0	0	0	0	0	0.75
46000	0	0	0	0	0	0	0	0	0
46400	0	0	0	0	0	0	0	0	1
46800	0	0	0	0	0	0	0	0.5	1
47200	0	0	0	0	0	0.75	0	0	1
47600	0	0	0.75	0	0	0	0	0	0
48000	0	0	0.75	0	0	0	0	0	0.75
48400	0	0	0	0	0	0	0	0	0.75
48800	0	0	0	0	0	0.75	0	0	0.75
49200	0	0	0	0	0	1	0	0	0
49600	0	0	0	0	0	0.75	0	0	0.75
50000	0	0	0.75	0	0.5	1	0	0	0
50400	0	0	1	0	0	0	0	0	0
50800	0	0	0	0	0	0	0	0	0
51200	0	0	0	0	0	0	0	0	0
51600	0	0	0	0	0	0	0	0	0
52000	0	0	0.75	0	0	0	0	0	0.75
52400	0	0	0.75	0	0	1	0	0	0
52800	0	0	0	0	0	0	0	0	0
53200	0	0	1	0	0	1	0	0	0
53600	0	0	0	0	0	0	0	0	0
54000	0	0	0	0	0	0	0	0	0.75
54400	0	0	0.75	0	0	0	0	0	0.75
54800	0	0	0	0	0	0	0	1	1
55200	0	0	0.75	0	0	0	0	0	0.75
55600	0	0	0.75	0	0	0.75	0	0	1
56000	0	0	1	0	0	0	0	1	1
56400	0	0	1	0	0	0	0	0	1
56800	0	0	1	0	0	0.75	0	0	1
57200	0	0	1	0	0	0.75	0	0	0
57600	0	0	1	0	0	0	0	0	0
58000	0	0	1	0	0	0.75	0	1	1
58400	0	0	0.75	0	0	0	0	0	0.75
58800	0	0	0.75	0	0	0	0	0	0
59200	0	0.5	1	0	0	0.75	0	0	0
59600	0	0.5	1	0	0	0.75	0	0	0
60000	0	0.5	1	0	0	0	0	0	0
60400	0	0.5	1	0	0	0	0	0	0.75
60800	0	0.5	1	0	0	0.75	0	0	0.75
61200	0	0	1	0	0	0	0	0	1
61600	0	0	1	0	0	0.75	0	0.5	1
62000	0	0	1	0	0	0.75	0	0	1
62400	0	0	1	0	0	0.75	0	0	0.75
62800	0	0	1	0	0	0.75	0	0	0
63200	0	1	1	0	0	0	1	1	1
63600	0	0.5	1	0	0	1	0	0	0
64000	0	0.5	1	0	0	0.75	0	0	0.75
64400	0	0	1	0	0	0	0	0	1
64800	0	0	0	0	0	0	0	0.5	1
65200	0	0.5	1	0	0	1	0	1	1
65600	0	0.5	1	0	0	0.75	0	0	0
66000	0	0.5	1	0	0	0	0	0	1
66400	0	0.5	1	0	0	1	0	0	0
66800	0	1	1	0	0	0	0	0.5	1
67200	0	0.5	1	0	0	0	0	0	0.75
67600	0	1	1	0	0	0	0	0	1
68000	0	1	1	0	0	0.75	0	0	0.75
68400	0	1	1	0	0	0	0	0	0
68800	0	0.5	1	0	0	0	0	0	1
69200	0	1	1	0	0	0.75	0	0	1
69600	0	0.5	1	0	0	0	0	0.5	1
70000	0	1	1	0	0	0	0	0	0
70400	1	1	1	0	0	0	0	0	1
70800	0	0.5	1	0	0	0	0	0	0
71200	0.25	1	1	0	0	0.75	0	0	0.75
71600	0	1	1	0	0	0.75	0	0	0.75
72000	1	1	1	0	0	0	0	0	0
72400	1	1	1	0	0	0	0	0	0.75
72800	0	0.5	1	0	1	1	0	0	0.75
73200	0	1	1	0	0	0.75	0	0	1
73600	1	1	1	0	0	0	0	0.5	1
74000	1	1	1	0	0	0	0	0	1
74400	0.25	1	1	0	0	0.75	0	0	0
74800	0	0.5	1	0	0	0	0	0.5	1
75200	1	1	1	0	0	0.75	0	0.5	1
75600	1	1	1	0	0	0	0	0	0
76000	0.25	1	1	0	0.5	1	0	0	0
76400	1	1	1	0	0	0.75	0	0	1
76800	1	1	1	0	0	0	0	0	0.75
77200	0	1	1	0	0	0	0	0	0
77600	0.25	1	1	0	0	0	0	0	0
78000	1	1	1	0	0	0	0	0	0.75
78400	0.25	1	1	0	0	0	0	0	0
78800	0.25	1	1	0	0	0	0	0	0
79200	0.25	1	1	0	0	0	0	0	0.75
79600	1	1	1	0	0	0	0	0	0
80000	1	1	1	0	0	1	0	0	0
80400	1	1	1	0	0	1	0	0	0
80800	0.25	1	1	0	0	0	0	0	0.75
81200	0	1	1	0	0	0	0	0	0.75
81600	1	1	1	0	0	0	0	1	1
82000	1	1	1	0	0	0	0	0	0
82400	1	1	1	0	0	0.75	0	0	0
82800	1	1	1	0	1	1	0	0	0.75
83200	1	1	1	0	0	0	0	0.5	1
83600	1	1	1	0	0	0	0	0	0.75
84000	1	1	1	0	0	0	0	0	1
84400	1	1	1	0	0	0	0	0	0
84800	1	1	1	0	0	0	0	0	0
85200	1	1	1	0	0	0	0	0	0
85600	1	1	1	0	0	0	0	1	1
86000	1	1	1	0	0	0	0	0	0
86400	1	1	1	0	0	1	0	0	0
86800	1	1	1	0	0	0	0	0	0
87200	1	1	1	0	0	0	0	0	0
87600	1	1	1	0	0	0	0	0	0.75
88000	1	1	1	0	0	0.75	0	0	1
88400	1	1	1	0	0	0.75	0	0	0
88800	1	1	1	0	0	0	0	0	0
89200	1	1	1	0	0	0.75	0	0	0.75
89600	1	1	1	0	0	0	0	0	0.75
90000	1	1	1	0	0	1	0	0	0
90400	1	1	1	0	0	1	0	0	0.75
90800	0.25	1	1	0	0	0.75	0	0	0
91200	1	1	1	0	1	1	0	0.5	1
91600	1	1	1	0	0	0	0	0	0.75
92000	1	1	1	0	0	0	0	0.5	1
92400	1	1	1	0	0	0	0	0.5	1
92800	1	1	1	0	0	1	0	0	0.75
93200	1	1	1	0	0	0	0	0.5	1
93600	1	1	1	0	0	0	0	0	0
94000	1	1	1	0	0	0	0.25	1	1
94400	1	1	1	0	0	0	0	0	0
94800	1	1	1	0	0	0	0	1	1
95200	1	1	1	0	0	0	0	0	0.75
95600	1	1	1	0	0	0.75	0	0	0
96000	1	1	1	0	0	0	0	0	0
96400	1	1	1	0	0	1	0	0	0.75
96800	1	1	1	0	0	0.75	0	0	1
97200	1	1	1	0	0	1	0	0	1
97600	1	1	1	0	0	0.75	0	0	0
98000	1	1	1	0	0	0	0	0	0
98400	0.25	1	1	0	0	0	0	0	0.75
98800	1	1	1	0	0	0	0	0	0
99200	1	1	1	0	0	0	0	0.5	1
99600	1	1	1	0	0	1	0	0	0
100000	1	1	1	0	0	0	0	0	0.75
100400	1	1	1	0	0	0.75	0	0	0
100800	1	1	1	0	0	0	0	1	1
101200	1	1	1	0	0	0.75	0	0	1
101600	1	1	1	0	0	0.75	0	0	0.75
102000	1	1	1	0	0	0	0	1	1
102400	1	1	1	0	0	0	0	0	1
102800	1	1	1	0	0	0.75	0	0	0
103200	1	1	1	0	0	0	0	0	0
103600	1	1	1	0	0	0	0	0	1
104000	1	1	1	0	0	0.75	0	0.5	1
104400	1	1	1	0	0	0	0	0	0.75
104800	1	1	1	0	0	0	0	0	0
105200	1	1	1	0	0	0.75	0	0	0.75
105600	1	1	1	0	0	0	0	0	0
106000	1	1	1	0	0	0.75	0	0	0.75
106400	1	1	1	0	0	0	0	0	0
106800	1	1	1	0	0.5	1	0	0	0
107200	1	1	1	0	0	0.75	0	0.5	1
107600	1	1	1	0	0	0.75	0	0	0
108000	1	1	1	0	0	0	0	0.5	1
108400	1	1	1	0	0	0	0	0	1
108800	1	1	1	0	0	0.75	0	0	0
109200	1	1	1	0	0.5	1	0	0	0.75
109600	1	1	1	0	0	0.75	0	0	0.75
110000	1	1	1	0	0	1	0	0	0
110400	1	1	1	0	0	0	0	1	1
110800	1	1	1	0	0	0	0	0	0
111200	0.25	1	1	0	0	0	0	0	1
111600	1	1	1	0	0	0.75	0	0	0.75
112000	1	1	1	0	0	0	0	0	0.75
112400	1	1	1	0	0	0	0	0	0.75
112800	1	1	1	0	0	0	0	0	0
113200	1	1	1	0	0	0	0	0	1
113600	1	1	1	0	0	0	0	0	0.75
114000	1	1	1	0	0	1	0	0	0
114400	1	1	1	0	0	0	0	0	0.75
114800	1	1	1	0	0	0	0	0	1
115200	1	1	1	0	0	0	0	0	0.75
115600	1	1	1	0	0	1	0	0	0
116000	1	1	1	0	0	0	0	0	1
116400	1	1	1	0	0	0	0	0	0.75
116800	1	1	1	0	0	1	0	0	1
117200	1	1	1	0	0	0	0	0	0.75
117600	1	1	1	0	0	0	0	0.5	1
118000	1	1	1	0	0	0	0	0	0
118400	1	1	1	0	0	0.75	0	0	0.75
118800	1	1	1	0	0.5	1	0	0	0.75
119200	1	1	1	0	0	0	0	0	1
119600	1	1	1	0	0	0	0	0	0
120000	0	1	1	0	0	0.75	0	0	1
120400	1	1	1	0	0	0	0	0	1
120800	1	1	1	0	0.5	1	0	0	1
121200	1	1	1	0	0	0	0	0.5	1
121600	1	1	1	0	0	1	0	0.5	1
122000	1	1	1	0	0	0	0	0	0.75
122400	1	1	1	0	0	0	0	1	1
122800	1	1	1	0	0	0.75	0	0	0
123200	1	1	1	0	0	1	0	0	0
123600	1	1	1	0	0	0	0	0	0
124000	1	1	1	0	0	0.75	0	1	1
124400	0.25	1	1	0	0	1	0.25	1	1
124800	1	1	1	0	0.5	1	0	0	0.75
125200	1	1	1	0	0	0.75	0	0.5	1
125600	1	1	1	0	0	0.75	0	0	0.75
126000	1	1	1	0	0	0.75	0	0	1
126400	1	1	1	0	0	0	0	0	0.75
126800	1	1	1	0	0	0	0	0	0
127200	1	1	1	0	0	1	0	0.5	1
127600	1	1	1	0	0.5	1	0	0	0
128000	1	1	1	0	0	0	0	0	1
128400	1	1	1	0	0	0	0	0	1
128800	1	1	1	0	0	0.75	0	0.5	1
129200	1	1	1	0	1	1	0	0	0
129600	1	1	1	0	0	0.75	0	0.5	1
130000	1	1	1	0	0	0	0	0	0
130400	1	1	1	0	0	0.75	0	0	0
130800	1	1	1	0	0	0	0	0	1
131200	1	1	1	0	0	0.75	0	0	0
131600	1	1	1	0	0	0.75	0	0.5	1
132000	1	1	1	0	0	0	0	0	0.75
132400	1	1	1	0	0	1	0	0	0.75
132800	1	1	1	0	0	0	0	0	1
133200	1	1	1	0	0	1	0	0	0.75
133600	1	1	1	0	0	0	0	0	0
134000	1	1	1	0	0	0	0	0.5	1
134400	1	1	1	0	0	0.75	0	0	0
134800	1	1	1	0	0	1	0	0	0
135200	1	1	1	0	0	0	0	0	0.75
135600	1	1	1	0	0	0	0	0	0.75
136000	1	1	1	0	0	0.75	0	0	0.75
136400	1	1	1	0	0	0	0	0	0.75
136800	1	1	1	0	0	0	0	0	0
137200	1	1	1	0	0	0	0	0	0
137600	1	1	1	0	0	0.75	0	0	0
138000	1	1	1	0	0	0.75	0	0	0
138400	1	1	1	0	0	0.75	0	0	0.75
138800	1	1	1	0	0	0	0	0	0
139200	1	1	1	0	0	0	0	0.5	1
139600	1	1	1	0	0.5	1	0	0	1
140000	1	1	1	0	0	0	0	0	0.75
140400	1	1	1	0	0	0	0	0	1
140800	1	1	1	0	0	0	0.25	1	1
141200	1	1	1	0	0	0.75	0	0	0
141600	1	1	1	0	0	0	0	0.5	1
142000	1	1	1	0	0	1	0	0	1
142400	1	1	1	0	0	0	0	0	1
142800	1	1	1	0	0	1	0	0	0.75
143200	1	1	1	0	0	0	0	0	0
143600	0	1	1	0	0	0	0	0	0.75
144000	1	1	1	0	0	0.75	0	0	0.75
144400	1	1	1	0	0	0	0	1	1
144800	1	1	1	0	0	0.75	0	0	1
145200	1	1	1	0	0	0.75	0	0	1
145600	1	1	1	0	0	0	0	0	0.75
146000	1	1	1	0	0	1	0	1	1
146400	1	1	1	0	0	0	0	0	0
146800	1	1	1	0	0	0	0	0	0
147200	1	1	1	0	0	0.75	0	0	0.75
147600	1	1	1	0	0	0	0	0	0
148000	1	1	1	0	0	0	0	0	0.75
148400	1	1	1	0	0	0	0	0.5	1
148800	1	1	1	0	0	0.75	0	0	0.75
149200	1	1	1	0	0	0	0	0	1
149600	1	1	1	0	0	0.75	0	0	0
150000	1	1	1	0	0	0.75	0	0	1
150400	1	1	1	0	0	0	0	0	1
150800	1	1	1	0	0	0	0	0	1
151200	1	1	1	0	0	0	0	0	0.75
151600	1	1	1	0	0	0	0	0	0
152000	1	1	1	0	0	0	0	0	0
152400	1	1	1	0	0	0	0	0	1
152800	1	1	1	0	0	0	0	0	0
153200	1	1	1	0	0	0	0	0	0
153600	1	1	1	0	0	0.75	0	0	0.75
154000	1	1	1	0	0	0	0	0.5	1
154400	1	1	1	0	1	1	0	0	0.75
154800	1	1	1	0	0.5	1	0	0	0
155200	1	1	1	0	0	0.75	0	0	0
155600	1	1	1	0	0	0	0	0	1
156000	1	1	1	0	0	0.75	0	0	0.75
156400	1	1	1	0	0	0	0	0	0
156800	1	1	1	0	0	1	0	0	1
157200	0.25	1	1	0	0	0	0	0	0
157600	1	1	1	0	0	0	0	0	0.75
158000	1	1	1	0	0	0	0	0	0
158400	1	1	1	0	0	0.75	0	0	0.75
158800	1	1	1	0	0	0	0	0	0
159200	1	1	1	0	0	0	0	0	0.75
159600	1	1	1	0	0	0	0	0	1
160000	1	1	1	0	0	0	0	0	0
160400	1	1	1	0	0	0	0	0	0.75
160800	1	1	1	0	0	0.75	0	0	0.75
161200	1	1	1	0	0	0	0	0	0.75
161600	1	1	1	0	0	0.75	0	0	0
162000	1	1	1	0	0	0	0	0	0
162400	1	1	1	0	0	0	0	0.5	1
162800	1	1	1	0	0	0	0	0.5	1
163200	1	1	1	0	0	0.75	0	1	1
163600	1	1	1	0	0	0	0	0	0
164000	1	1	1	0	0	0	0	0	1
164400	1	1	1	0	0	0	0	0	0
164800	1	1	1	0	0	0.75	0	0	0
165200	1	1	1	0	0	0	0	0	0.75
165600	1	1	1	0	0	0.75	0	0	1
166000	1	1	1	0	0	0.75	0	0	0
166400	1	1	1	0	0	0.75	0	0	0.75
166800	1	1	1	0	0	0	0	0	0
167200	1	1	1	0	0	1	0	0	0
167600	1	1	1	0	1	1	0	0	0
168000	1	1	1	0	0	0	0	0	1
168400	1	1	1	0	0	0	0	0	1
168800	1	1	1	0	0	0.75	0	0	0
169200	1	1	1	0	0	1	0	0	0
169600	1	1	1	0	0	0.75	0	0	0
170000	1	1	1	0	0	1	0	0	0.75
170400	1	1	1	0	0	0	0	0	0
170800	1	1	1	0	0	0	0	0.5	1
171200	1	1	1	0	0	0	0	0	0.75
171600	1	1	1	0	0	0	0	0	1
172000	1	1	1	0	0	0	0	1	1
172400	1	1	1	0	0	1	0	0	0.75
172800	1	1	1	0	0	1	0	0	0.75
173200	1	1	1	0	0	0	0	0	0.75
173600	1	1	1	0	0	0	0	1	1
174000	1	1	1	0	0	0	0	0.5	1
174400	1	1	1	0	0	0	0	0	0.75
174800	1	1	1	0	0	1	0	0	0.75
175200	1	1	1	0	0	0.75	0	0.5	1
175600	1	1	1	0	0	1	0	0	0.75
176000	1	1	1	0	0.5	1	0	0.5	1
176400	1	1	1	0	0	1	0	0	1
176800	1	1	1	0	0	0.75	0	0	0
177200	1	1	1	0	0	0	0	0	0
177600	1	1	1	0	0	0.75	0	1	1
178000	1	1	1	0	0	0.75	0	0.5	1
178400	1	1	1	0	0	0.75	0	0	0.75
178800	1	1	1	0	0	0	0	0	0.75
179200	1	1	1	0	0.5	1	0	0	1
179600	1	1	1	0	0	0.75	0	0	0.75
180000	1	1	1	0	0	1	0	0.5	1
180400	1	1	1	0	0	0	0	0	0
180800	1	1	1	0	0	1	0	0	0.75
181200	1	1	1	0	0	0	0	0	0.75
181600	1	1	1	0	0	1	0	1	1
182000	1	1	1	0	0	1	0	0.5	1
182400	1	1	1	0	0	0.75	0	0	1
182800	1	1	1	0	0	0	0	0.5	1
183200	1	1	1	0	0	0.75	0	0	0.75
183600	1	1	1	0	0.5	1	0	0	1
184000	1	1	1	0	0	0.75	0	0	0
184400	1	1	1	0	0	0.75	0	0	0.75
184800	1	1	1	0	0	0	0	0	0
185200	1	1	1	0	0	0.75	0	0	1
185600	1	1	1	0	0	0.75	0	0	1
186000	1	1	1	0	0	0	0	0	0.75
186400	1	1	1	0	0	0.75	0	0	0.75
186800	1	1	1	0	0	0.75	0	0.5	1
187200	1	1	1	0	0	0	0	0	1
187600	1	1	1	0	1	1	0	0	0.75
188000	0.25	1	1	0	0	1	0	0	0.75
188400	1	1	1	0	0.5	1	0	0	1
188800	1	1	1	0	0	0	0	0	0
189200	1	1	1	0	0	0.75	0	0	0
189600	1	1	1	0	0	0.75	0	0	1
190000	1	1	1	0	0	0	0	0	0.75
190400	1	1	1	0	0	0.75	0	0	0.75
190800	1	1	1	0	0.5	1	0	0	1
191200	1	1	1	0	0	0.75	0	1	1
191600	1	1	1	0	0	0.75	0	0	0
192000	1	1	1	0	0	0	0	0	0.75
192400	1	1	1	0	0	0.75	0	0	0
192800	1	1	1	0	0	0.75	0	0	0.75
193200	1	1	1	0	0	0	0	0	1
193600	1	1	1	0	0	0	0	0	0.75
194000	1	1	1	0	0	1	0	0	0
194400	1	1	1	0	0	1	0	0	0
194800	1	1	1	0	0	0	0	0.5	1
195200	1	1	1	0	0	0	0	0	0
195600	1	1	1	0	0.5	1	0	0	1
196000	1	1	1	0	0.5	1	0	0	1
196400	1	1	1	0	0	0.75	0	0	0
196800	1	1	1	0	0	0.75	0	0.5	1
197200	1	1	1	0	0	0	0	0	0
197600	1	1	1	0	0	0.75	0	0	0.75
198000	1	1	1	0	0	0	0	0	0
198400	1	1	1	0	0.5	1	0	0	0.75
198800	1	1	1	0	0	0	0	0	0
199200	1	1	1	0	0	0	0	0	0.75
199600	1	1	1	0	0	0.75	0	0	0
200000	1	1	1	0	0	0	0	0	0.75
200400	1	1	1	0	0.5	1	0	0	0.75
200800	1	1	1	0	0	0	0	1	1
201200	0.25	1	1	0	0	0	0	1	1
201600	1	1	1	0	0	1	0	0.5	1
202000	1	1	1	0.25	1	1	0	0.5	1
202400	1	1	1	0	0	0.75	0	0.5	1
202800	1	1	1	0	0	0	0	0	0
203200	1	1	1	0	0.5	1	0	0.5	1
203600	1	1	1	0	0	0.75	0	0	0
204000	1	1	1	0	0	1	0	0	0
204400	1	1	1	0	0	0.75	0	0.5	1
204800	1	1	1	0	0	0.75	0	0	0
205200	1	1	1	0	0	0	0	0	1
205600	1	1	1	0	0	0.75	0	1	1
206000	1	1	1	0	0	0	0	0	1
206400	1	1	1	0	0	0	0	0	0
206800	1	1	1	0	0	0.75	0	0	0
207200	0.25	1	1	0	0	0	0	0	0.75
207600	1	1	1	0	0	0	0	1	1
208000	1	1	1	0	0.5	1	0	0	0
208400	1	1	1	0	0	0	0	0	0
208800	1	1	1	0	0	0.75	0	0	1
209200	1	1	1	0	0	1	0	0	0.75
209600	1	1	1	0	0	0.75	0	0	0
210000	1	1	1	0	0	0.75	0	0	0.75
210400	1	1	1	0	0	1	0	0.5	1
210800	1	1	1	0	0.5	1	0	0	0.75
211200	1	1	1	0	0	0	0	0	1
211600	1	1	1	0	0	0.75	0	0	0
212000	1	1	1	0	0	0	0	0	0
212400	1	1	1	0	0	0	0	0	0
212800	1	1	1	0	0	0	0	0	1
213200	1	1	1	0	0	0	0	0	1
213600	1	1	1	0	0	0	0	1	1
214000	1	1	1	0	0	0	0	0	1
214400	1	1	1	0	0	1	0	0	1
214800	1	1	1	0	1	1	0	0	0.75
215200	1	1	1	0	0	0.75	0.25	1	1
215600	1	1	1	0	0.5	1	0	0	0
216000	1	1	1	0	0.5	1	0	0	0
216400	1	1	1	0	0	0	0	0	0.75
216800	1	1	1	0	0	1	0	0	0.75
217200	1	1	1	0	0.5	1	0	0	0
217600	1	1	1	0	0	0	0	0	0
218000	1	1	1	0	0	0	0	0	0
218400	1	1	1	0	0	0.75	0	0	0.75
218800	1	1	1	0	0	1	0	0	1
219200	1	1	1	0	0	0	0	0	0
219600	1	1	1	0	0	0	0	0	0
220000	1	1	1	0	0	0	0	0	1
220400	1	1	1	0	0	0	0	0	0
220800	1	1	1	0	0	0	0	0	0
221200	1	1	1	0	0	1	0	0	1
221600	1	1	1	0	0	0	0	0	0
222000	1	1	1	0	0	0	0	0.5	1
222400	1	1	1	0	0	0	0	0	0.75
222800	1	1	1	0	0	0.75	0	0	0
223200	1	1	1	0	0	0	0	0	0
223600	1	1	1	0	0	0.75	0	0	0
224000	1	1	1	0	0	0	0	0	0
224400	1	1	1	0	0	0	0.25	1	1
224800	1	1	1	0	0	0	0	0	1
225200	1	1	1	0	0	0	0	0	1
225600	1	1	1	0	0	0	0	0	0
226000	1	1	1	0	0	0	0	0	0
226400	1	1	1	0	0	0.75	0	0	1
226800	1	1	1	0	0	0	0	0	0.75
227200	1	1	1	0	0	0	0	0.5	1
227600	1	1	1	0	0.5	1	0	0	0
228000	1	1	1	0	0	0.75	0	0	0
228400	1	1	1	0	0	0	0	0	0
228800	1	1	1	0	0	1	0	0.5	1
229200	1	1	1	0	0	0	0	1	1
229600	1	1	1	0	0	0	0	0	0
230000	1	1	1	0	0	0.75	0	0	0
230400	1	1	1	0	0	0.75	0	0	0.75
230800	1	1	1	0	0	0.75	0	0	0.75
231200	1	1	1	0	0	0.75	0.25	1	1
231600	1	1	1	0	0	0	0	0	1
232000	1	1	1	0	0.5	1	0	0.5	1
232400	1	1	1	0	0	0	0	0	0.75
232800	1	1	1	0	0.5	1	0	0	0
233200	1	1	1	0	0	0	0	0	0.75
233600	1	1	1	0	0	1	0	0.5	1
234000	1	1	1	0	0	1	0	0	1
234400	1	1	1	0	0	0	0	0	0.75
234800	1	1	1	0	0	0	0.25	1	1
235200	1	1	1	0	0	0	0	0.5	1
235600	1	1	1	0	0	0	0	0	0.75
236000	1	1	1	0	0	0	0	0.5	1
236400	1	1	1	0	0	1	0	0	0
236800	1	1	1	0	0	0.75	0	0	0
237200	1	1	1	0	0	0.75	0	0	0
237600	1	1	1	0	0	0.75	0	0	0
238000	1	1	1	0	0	1	0	0	0.75
238400	1	1	1	0	0	0	0	0	0
238800	1	1	1	0	0	0.75	0	0	0
239200	1	1	1	0	0	0.75	0	0	0.75
239600	1	1	1	0	0	1	0	0.5	1
240000	1	1	1	0	0	1	0	0.5	1
240400	1	1	1	0	0.5	1	0	0	0
240800	1	1	1	0	0	0	0	0	0.75
241200	1	1	1	0	0	1	0	0	0.75
241600	1	1	1	0	0	0	0	0	1
242000	1	1	1	0	0	0	0	0	0
242400	1	1	1	0	0	0	0	0	0
242800	1	1	1	0	0.5	1	0	0	0
243200	1	1	1	0	0	1	0	0	1
243600	1	1	1	0	0	0.75	0	0.5	1
244000	1	1	1	0	0.5	1	0	0.5	1
244400	1	1	1	0	0	0.75	0	0.5	1
244800	1	1	1	0	0	1	0	0	1
245200	1	1	1	0	0	1	0	0	0
245600	1	1	1	0	0	1	0	0	1
246000	1	1	1	0	0	0.75	0	0	0
246400	1	1	1	0	0	0.75	0	0	0
246800	1	1	1	0	0	0.75	0	0	0.75
247200	1	1	1	0	0	0	0	0	1
247600	1	1	1	0	0	0	0	0	0.75
248000	1	1	1	0	0	0	0	0	0
248400	1	1	1	0	0	1	0.25	1	1
248800	1	1	1	0	0	1	0.25	1	1
249200	1	1	1	0	0	0	0	0	0
249600	1	1	1	0	0	0	0	0	1
250000	1	1	1	0	0	1	0	0	0.75
250400	1	1	1	0	0	0	0	0	0.75
250800	1	1	1	0	0	0.75	0	0.5	1
251200	1	1	1	0	0	1	0	0	0.75
251600	1	1	1	0.25	1	1	0	0	0.75
252000	1	1	1	0	0	0	0	0	1
252400	1	1	1	0	0	1	0	0	0.75
252800	1	1	1	0	0	0.75	0	0	0
253200	1	1	1	0	0	0	0	0	0
253600	1	1	1	0	0	0	0	0	0
254000	1	1	1	0	0	1	0	0	0
254400	1	1	1	0	0	0	0	0	0.75
254800	1	1	1	0	0	1	0	0	0.75
255200	1	1	1	0	0	0	0	0	0.75
255600	1	1	1	0	0	0	0	0	0
256000	1	1	1	0	0	0	0	0	1
256400	1	1	1	0	0	0.75	0	0	0.75
256800	1	1	1	0	0	0	0.25	1	1
257200	1	1	1	0	0	0	0	0	1
257600	1	1	1	0	0	0.75	0	0	0.75
258000	1	1	1	0	0	0	0	0	0
258400	1	1	1	0	0	1	0	0	0.75
258800	1	1	1	0	0	0	0	0	0
259200	1	1	1	0	0	1	0	0	0.75
259600	1	1	1	0	0.5	1	0	0	0
260000	1	1	1	0	0	0	0	0	0
260400	1	1	1	0	0	1	0	0	0.75
260800	1	1	1	0	0	0.75	0	0	1
261200	1	1	1	0	1	1	0	0.5	1
261600	1	1	1	0	0	0	0	0	0.75
262000	1	1	1	0	1	1	0	0	0.75
262400	1	1	1	0	0	1	0	0	0
262800	1	1	1	0	0	0	0	0	0
263200	1	1	1	0	0	0	0	0	0
263600	1	1	1	0	0	0	0	0	0.75
264000	1	1	1	0	0	0.75	0	0	0
264400	1	1	1	0	0.5	1	1	1	1
264800	1	1	1	0	0	1	0	0	0
265200	1	1	1	0	0	1	0	0	0
265600	1	1	1	0	0	0	0	0.5	1
266000	1	1	1	0	0	0	0	0	0
266400	1	1	1	0	0	0.75	0	0	1
266800	1	1	1	0	0	1	0	0	1
267200	1	1	1	0	0	0	0	0	0
267600	1	1	1	0	0	0	0	0	1
268000	1	1	1	0	0	1	0	0	0
268400	1	1	1	0	0	0.75	0	0	0.75
268800	1	1	1	0	0	0.75	0	0	0
269200	1	1	1	0	0	0	0	0	0
269600	1	1	1	0	0	0.75	0	0	1
270000	1	1	1	0	0	0	0	0	0
270400	1	1	1	0	0	0	0	0	0
270800	1	1	1	0	0	0	0	0	0
271200	1	1	1	0	0	0.75	0	0	0.75
271600	1	1	1	0	0	0.75	0	0.5	1
272000	1	1	1	0	1	1	0	0	0.75
272400	1	1	1	0	0	0.75	0	0	0
272800	1	1	1	0	0	0	0	0	1
273200	1	1	1	0	0.5	1	0	0	0
273600	1	1	1	0	0	0	0	0.5	1
274000	1	1	1	0	0	0	0	0	0
274400	1	1	1	0	0	0	0	0	0
274800	1	1	1	0	0	0	0	0	0.75
275200	1	1	1	0	0	0.75	0	0	0.75
275600	1	1	1	0	0	0	0	0	0.75
276000	1	1	1	0	0	1	0	0	0.75
276400	1	1	1	0	0	0	0	0	0.75
276800	1	1	1	0	0	1	0	0	0.75
277200	1	1	1	0	0	0	0	0	1
277600	1	1	1	0	0	0.75	0	0	0
278000	1	1	1	0	0	1	0	1	1
278400	1	1	1	0	0	0.75	0	0	0
278800	1	1	1	0	0.5	1	0	0	0
279200	1	1	1	0	0	0.75	0	0	0.75
279600	1	1	1	0	0	0.75	0	0	1
280000	1	1	1	0	0	0.75	0	0	0.75
280400	1	1	1	0	0.5	1	0	0.5	1
280800	1	1	1	0	0	0	0	0	0
281200	1	1	1	0	0	0	0	0	1
281600	1	1	1	0	0	0	0	0	0
282000	1	1	1	0	0	0	0	0	0.75
282400	1	1	1	0	0	0	0	0	1
282800	1	1	1	0	0	0	0	0.5	1
283200	1	1	1	0	0	1	0	1	1
283600	1	1	1	0	0	0	0	0	0
284000	1	1	1	0	0	1	0	0	0
284400	1	1	1	0	0.5	1	0	0.5	1
284800	1	1	1	0	0	0	0.25	1	1
285200	1	1	1	0	1	1	0	0	0
285600	0.25	1	1	0	0	0	0	0	0
286000	1	1	1	0	0	0.75	0	0.5	1
286400	1	1	1	0	0	0	0	0	0.75
286800	1	1	1	0	0	1	0	0	1
287200	1	1	1	0	0	0	0	0	0.75
287600	1	1	1	0	0	0	0	0	0.75
288000	1	1	1	0	0	0	0.25	1	1
288400	1	1	1	0	0	0.75	0	0	0
288800	1	1	1	0	0	0.75	0.25	1	1
289200	1	1	1	0	0	0	0	0	1
289600	1	1	1	0	0	0.75	0	0	1
290000	1	1	1	0	0	0	0	0	0
290400	1	1	1	0	0	0	0	0.5	1
290800	1	1	1	0	0	1	0	0	0.75
291200	1	1	1	0	0	0	0	0	1
291600	1	1	1	0	0	0	0	0	0
292000	1	1	1	0	0	0.75	0	0	1
292400	1	1	1	0	0	0	0	0	1
292800	1	1	1	0	0	0.75	0	0	0
293200	1	1	1	0	0	0	0	0	0.75
293600	1	1	1	0	0	0.75	0	0	0.75
294000	1	1	1	0	0	0	0	0	0
294400	1	1	1	0	0.5	1	0	0	0.75
294800	1	1	1	0	0	0	0	0	1
295200	1	1	1	0	0	0.75	0	0	0
295600	1	1	1	0	0	0	0	0	0.75
296000	1	1	1	0	0	1	0	0	0.75
296400	1	1	1	0	0	0	0	0	1
296800	1	1	1	0	0	1	0	0.5	1
297200	1	1	1	0	0.5	1	1	1	1
297600	1	1	1	0	0.5	1	0	0	1
298000	1	1	1	0	0	0	0	0	1
298400	1	1	1	0	0	0	0	0	0.75
298800	1	1	1	0	0	1	0	0	1
299200	1	1	1	0	0	0.75	0	0	0
299600	1	1	1	0	0	0.75	0	0	0
300000	1	1	1	0	0	0.75	0	0	0
300400	1	1	1	0	0	0	0	0.5	1
300800	1	1	1	0	0	0	0	0	0.75
301200	1	1	1	0	0	1	0	0	0.75
301600	1	1	1	0	0	1	0	0	0
302000	1	1	1	0	0	0	0	0	0
302400	1	1	1	0	1	1	0	1	1
302800	1	1	1	0	0.5	1	0	0	0
303200	1	1	1	0	0	0	0	0.5	1
303600	1	1	1	0	0	0	0	0	0
304000	1	1	1	0	0	0.75	0	0	1
304400	1	1	1	0	0	1	0	0.5	1
304800	1	1	1	0	0	0.75	0	0.5	1
305200	1	1	1	0	0	1	0	0.5	1
305600	1	1	1	0	0	0	0	0	0.75
306000	1	1	1	0	0	0	0	1	1
306400	1	1	1	0	0	0	0	0	0
306800	1	1	1	0	0	0.75	0	0	0
307200	1	1	1	0	0	0	0	0	0.75
307600	1	1	1	0	0	1	0	0	0
308000	1	1	1	0	0	0	0	0	1
308400	1	1	1	0	0	0.75	0	0.5	1
308800	1	1	1	0	0	1	0	0	1
309200	1	1	1	0	0	0	0	0	0
309600	1	1	1	0	0	0	0	0	0.75
310000	1	1	1	0	0.5	1	0	0	0.75
310400	1	1	1	0	0	0	0	0	0.75
310800	1	1	1	0	0	0.75	0	0	0
311200	1	1	1	0	0	0	0	0	1
311600	1	1	1	0	0	1	0	0	0
312000	1	1	1	0	0.5	1	0	0	0
312400	1	1	1	0	0	0	0	0.5	1
312800	1	1	1	0	0	0.75	0	0	1
313200	1	1	1	0	0	0	0	0	1
313600	1	1	1	0	0	0.75	0	0	0
314000	1	1	1	0	0	1	0	0	0
314400	1	1	1	0	0	0.75	0	0	0.75
314800	1	1	1	0	0	0.75	0	0.5	1
315200	1	1	1	0	0	1	0	0	1
315600	1	1	1	0	0	1	0	0	0
316000	1	1	1	0	0	0.75	0	0	0
316400	1	1	1	0	0	0	0	0.5	1
316800	1	1	1	0	0	0	0	0.5	1
317200	1	1	1	0	0	1	0	0	0
317600	1	1	1	0	0	1	0	0	0
318000	1	1	1	0	0	1	0	0	0.75
318400	1	1	1	0	0	1	0	0	0.75
318800	1	1	1	0	0	0	0	1	1
319200	1	1	1	0	0	0	0	0	0
319600	1	1	1	0	0	0.75	0	0	0
320000	1	1	1	0	0	0	0	0	1
320400	1	1	1	0	0	0	0	0	1
320800	1	1	1	0	0.5	1	0	0	0.75
321200	1	1	1	0	0	0	0	0	0
321600	1	1	1	0	0	0.75	0	0	0
322000	1	1	1	0	0	0	0	0	0.75
322400	1	1	1	0	0.5	1	0	0	0.75
322800	1	1	1	0	0	0	0	0.5	1
323200	1	1	1	0	0	0	0	0	0.75
323600	1	1	1	0	0	0	0	0	0.75
324000	1	1	1	0	0	0	0	0	1
324400	1	1	1	0	0	0	0	0	1
324800	1	1	1	0	0	0	0	0	0
325200	1	1	1	0	0	0	0	0	0
325600	1	1	1	0	0	0	0	0.5	1
326000	1	1	1	0	0	0	0	0	0
326400	1	1	1	0	0	0.75	0	0	0.75
326800	1	1	1	0	0	1	0	0	1
327200	1	1	1	0	0	0.75	0	0	1
327600	1	1	1	0	0.5	1	0	0	0
328000	1	1	1	0	0	0.75	0	0	0.75
328400	1	1	1	0	0	1	0	0	0
328800	1	1	1	0	0	0	0	0	1
329200	1	1	1	0	0	0	0	0	1
329600	1	1	1	0	0	0	0	0	0.75
330000	1	1	1	0	0	0.75	0	0.5	1
330400	1	1	1	0	0.5	1	0	0	0
330800	1	1	1	0	0	0	0	0	0.75
331200	1	1	1	0	0	0.75	0	0	0
331600	1	1	1	0	0.5	1	0	1	1
332000	1	1	1	0	0	0	0	0	0
332400	1	1	1	0	0	1	0	0	0
332800	1	1	1	0	0	0	0	0	0
333200	1	1	1	0	1	1	0	0	0.75
333600	1	1	1	0	0	0	0	0	0.75
334000	1	1	1	0	0	0	0	0	0
334400	1	1	1	0	0	1	0	0	0.75
334800	1	1	1	0	0	0.75	0	0	0
335200	1	1	1	0	0	0.75	0	0.5	1
335600	1	1	1	0	0	0	0	0	1
336000	1	1	1	0	0	0	0	0	0.75
336400	1	1	1	0	0	0.75	0	0	1
336800	1	1	1	0	0.5	1	0	0	0.75
337200	1	1	1	0	0	1	0	0	0
337600	1	1	1	0	0	0	0	0	0
338000	1	1	1	0	0	0	0	0	0.75
338400	1	1	1	0	0	0	0	0	0
338800	1	1	1	0	0	0	0	0	0.75
339200	1	1	1	0	0	0	0	0	1
339600	1	1	1	0	0	1	0	0	0.75
340000	1	1	1	0	0	0.75	0	0	0.75
340400	1	1	1	0	0	0.75	0	0	0.75
340800	1	1	1	0	0	0.75	0	0	0.75
341200	1	1	1	0	0	0	0	0	0
341600	1	1	1	0	0	0	0	0	0.75
342000	1	1	1	0	0	1	0	0	1
342400	1	1	1	0	0	1	0	0	0
342800	1	1	1	0	0	0	0	0	0.75
343200	1	1	1	0	0	0	0	0	0
343600	1	1	1	0	0	0	0	0	0
344000	1	1	1	0	0	0	0	0	0.75
344400	1	1	1	0	0	0.75	0	0	0
344800	1	1	1	0	0	0	0	0	0
345200	1	1	1	0	0.5	1	0	0	1
345600	1	1	1	0	0	0	0	0	0.75
346000	1	1	1	0	0	1	0	0.5	1
346400	1	1	1	0	0	1	0	0	0.75
346800	1	1	1	0	1	1	0	0	0.75
347200	1	1	1	0	0	0	0	0.5	1
347600	1	1	1	0	0	0	0	0	0.75
348000	1	1	1	0	0	0	0	0	0
348400	1	1	1	0	1	1	0	0	1
348800	1	1	1	0	0.5	1	0	0	0
349200	1	1	1	0	0	0	0	0	0.75
349600	1	1	1	0	0	0	0	0	0.75
350000	1	1	1	0	0	0	0	0	0
350400	1	1	1	0	0	0.75	0	0.5	1
350800	1	1	1	0	0	0	0	0	0.75
351200	1	1	1	0	0	0	0	1	1
351600	1	1	1	0	0	0.75	0	0	0.75
352000	1	1	1	0	0	0.75	0	0	1
352400	1	1	1	0	0	0	0	0	0.75
352800	1	1	1	0	0	0	0	0	1
353200	1	1	1	0	0	0	0	0	0
353600	1	1	1	0	0	0	0	0	0.75
354000	1	1	1	0	0	1	0	0	0
354400	1	1	1	0	0	0	0	0	0
354800	1	1	1	0	0.5	1	0	0	1
355200	1	1	1	0	1	1	0	0	0.75
355600	1	1	1	0	0.5	1	0	0	0.75
356000	1	1	1	0	0	0.75	0	0	0.75
356400	1	1	1	0	0	0	0	0	1
356800	1	1	1	0	0	0	0	0.5	1
357200	1	1	1	0	0	1	0	0	0.75
357600	1	1	1	0	0	0	0	0.5	1
358000	1	1	1	0	0.5	1	0	1	1
358400	1	1	1	0	0	0	0	0	0
358800	1	1	1	0	0	0.75	0	0	0
359200	1	1	1	0	0	0	0	0	0
359600	1	1	1	0	1	1	0	0	1
360000	1	1	1	0	0	0	0	0	0.75
360400	1	1	1	0	0	0.75	0	0	1
360800	1	1	1	0	0	1	0	0	0.75
361200	1	1	1	0	0	0.75	0	0	0.75
361600	1	1	1	0	0	0.75	0	1	1
362000	1	1	1	0	0	1	0	0	0.75
362400	1	1	1	0	0	0.75	0	0	0.75
362800	1	1	1	0	0	0.75	0	0	0
363200	1	1	1	0	0	0	0	0.5	1
363600	1	1	1	0	0	0	0	0	1
364000	1	1	1	0	0.5	1	0	0.5	1
364400	1	1	1	0	0	0	0	1	1
364800	1	1	1	0	0	0	0	0.5	1
365200	1	1	1	0	0	0	0	0	0.75
365600	1	1	1	0	0	0	0	0	0
366000	1	1	1	0	0	1	0	0	0.75
366400	1	1	1	0	0	0.75	0	0	0
366800	1	1	1	0	0	0	0	0	1
367200	1	1	1	0	0.5	1	0	0	0.75
367600	1	1	1	0	0	0	0	0	0
368000	1	1	1	0	0	0	0	0	1
368400	1	1	1	0	0	0	0	0	0
368800	1	1	1	0	0	0	0	0.5	1
369200	1	1	1	0	0	0	0	0	0
369600	1	1	1	0	0	0	0	0	0.75
370000	1	1	1	0	0	0.75	0	0	0.75
370400	1	1	1	0	0	0	0	0	0.75
370800	1	1	1	0	0	0	0	0	1
371200	1	1	1	0	1	1	0	0	0
371600	1	1	1	0	0	0	0	0	1
372000	1	1	1	0	0	0	0	0	0.75
372400	1	1	1	0	0	0.75	0	0	1
372800	1	1	1	0	0	0	0	0	0.75
373200	1	1	1	0	0	0	0	0	0
373600	1	1	1	0	0	0.75	0	0	0.75
374000	1	1	1	0	0	0.75	0	0.5	1
374400	1	1	1	0	0	0	0	0	0.75
374800	1	1	1	0	0.5	1	0	0.5	1
375200	1	1	1	0	0	0	0	0	0
375600	1	1	1	0	0	0	0	0	0
376000	1	1	1	0	0	0	0	0	0.75
376400	1	1	1	0	0	1	0	0.5	1
376800	1	1	1	0	0	0	0	0	0.75
377200	1	1	1	0	0	0.75	0	0	0
377600	1	1	1	0	0	0	0	0	0
378000	1	1	1	0	0	0.75	0	0	0
378400	1	1	1	0	0	0.75	0	0	0
378800	1	1	1	0	0	1	0	0	0.75
379200	1	1	1	0	0	1	0	0	1
379600	1	1	1	0	0	0.75	0	0	0
380000	1	1	1	0	0	0.75	0	0	0.75
380400	1	1	1	0	0	1	0	0.5	1
380800	1	1	1	0	0	0	0	0.5	1
381200	1	1	1	0	0	0.75	0	0.5	1
381600	1	1	1	0	0	1	0	0	0
382000	1	1	1	0	0	1	0	1	1
382400	1	1	1	0	0	0	0	0	0
382800	1	1	1	0	1	1	0	0	0
383200	1	1	1	0	0	0.75	0	0.5	1
383600	1	1	1	0	0	0	0	0	0.75
384000	1	1	1	0	0	1	0	0	0
384400	1	1	1	0	0	0	0	0	0
384800	1	1	1	0	0	0	0	0	0.75
385200	1	1	1	0	0	1	0	0	0
385600	1	1	1	0	0	0	0	0	0
386000	1	1	1	0	0	0.75	0	0	0.75
386400	1	1	1	0	0	0	0	0	0.75
386800	1	1	1	0	0.5	1	0	0	0
387200	1	1	1	0	0	0.75	0	0	0.75
387600	1	1	1	0	1	1	0	0	0
388000	1	1	1	0	0	0	0	0	0
388400	1	1	1	0	0	0	0	0	1
388800	1	1	1	0	0	0.75	0	0	0
389200	1	1	1	0	0	0	0	0	0
389600	1	1	1	0	0	0.75	0	0	0.75
390000	1	1	1	0	0	0	0	0	1
390400	1	1	1	0	0	0.75	0	0	0.75
390800	1	1	1	0	0	0	0	0	0
391200	1	1	1	0	0	0.75	0	0	0
391600	1	1	1	0	0	0	0	0	1
392000	1	1	1	0	0	0	0	0	0.75
392400	1	1	1	0	0	1	0	0	0
392800	1	1	1	0	0.5	1	0	0	0
393200	1	1	1	0	0	0	0	0	1
393600	1	1	1	0	0	0	0	0	0
394000	1	1	1	0	0	0.75	0	0	0.75
394400	1	1	1	0	0	0	0	0	0
394800	1	1	1	0	0	1	0	0	0.75
395200	1	1	1	0	0	0	0	0	1
395600	1	1	1	0	0	0.75	0	0.5	1
396000	1	1	1	0	0	0.75	0	0.5	1
396400	1	1	1	0	0	0	0	0	0
396800	1	1	1	0	0	0	0	0	0
397200	1	1	1	0	0	0.75	0	0	0.75
397600	1	1	1	0	0	0	0	0	0
398000	1	1	1	0	0	0.75	0	0	0
398400	1	1	1	0	0	0.75	0	0	1
398800	1	1	1	0	0	1	0	0	0.75
399200	1	1	1	0	0	1	0	0	1
399600	1	1	1	0	0	0	0	0	0.75
400000	1	1	1	0	0	0	0	0	1

## Sheet: final percentiles
0	0	0	0	0	0	0	0	0	0
400	0	0	0	0	0	0	0	0	0
800	0	0	0	0	0	0	0	0	0
1200	0	0	0	0	0	0	0	0	0
1600	0	0	0	0	0	0	0	0	0
2000	0	0	0	0	0	0	0	0	0
2400	0	0	0	0	0	0	0	0	0
2800	0	0	0	0	0	0	0	0	0
3200	0	0	0	0	0	0	0	0	0
3600	0	0	0	0	0	0.0833333	0	0	0
4000	0	0	0	0	0	0.075	0	0	0
4400	0	0	0	0	0	0.075	0	0	0
4800	0	0	0	0	0	0.075	0	0	0
5200	0	0	0	0	0	0.075	0	0	0
5600	0	0	0	0	0	0.075	0	0	0
6000	0	0	0	0	0	0.075	0	0	0
6400	0	0	0	0	0	0.075	0	0	0
6800	0	0	0	0	0	0.075	0	0	0
7200	0	0	0	0	0	0.075	0	0	0
7600	0	0	0	0	0	0	0	0	0
8000	0	0	0	0	0	0	0	0	0
8400	0	0	0	0	0	0	0	0	0
8800	0	0	0	0	0	0.075	0	0	0
9200	0	0	0	0	0	0.075	0	0	0
9600	0	0	0	0	0	0.075	0	0	0
10000	0	0	0	0	0	0.075	0	0	0
10400	0	0	0	0	0	0.075	0	0	0
10800	0	0	0	0	0	0.075	0	0	0
11200	0	0	0	0	0	0.175	0	0	0
11600	0	0	0	0	0	0.175	0	0	0
12000	0	0	0	0	0	0.25	0	0	0
12400	0	0	0	0	0	0.325	0	0.05	0.1
12800	0	0	0	0	0	0.25	0	0.05	0.1
13200	0	0	0	0	0	0.25	0	0.05	0.1
13600	0	0	0	0	0	0.25	0	0.05	0.1
14000	0	0	0	0	0	0.325	0	0.05	0.1
14400	0	0	0	0	0	0.325	0	0.05	0.1
14800	0	0	0	0	0	0.4	0	0.05	0.1
15200	0	0	0	0	0	0.3	0	0.05	0.2
15600	0	0	0	0	0	0.3	0	0.05	0.3
16000	0	0	0	0	0	0.225	0	0.05	0.3
16400	0	0	0	0	0	0.225	0	0	0.2
16800	0	0	0	0	0	0.225	0	0	0.2
17200	0	0	0	0	0	0.3	0	0	0.2
17600	0	0	0	0	0	0.3	0	0	0.2
18000	0	0	0	0	0	0.225	0	0	0.275
18400	0	0	0	0	0	0.3	0	0	0.375
18800	0	0	0	0	0	0.225	0	0	0.475
19200	0	0	0	0	0	0.225	0	0	0.375
19600	0	0	0	0	0	0.225	0	0	0.275
20000	0	0	0	0	0	0.225	0	0	0.375
20400	0	0	0	0	0	0.15	0	0	0.375
20800	0	0	0	0	0	0.25	0	0	0.375
21200	0	0	0	0	0	0.175	0	0	0.375
21600	0	0	0	0	0	0.175	0	0	0.375
22000	0	0	0	0	0	0.25	0	0	0.3
22400	0	0	0	0	0	0.25	0	0	0.2
22800	0	0	0	0	0	0.325	0	0	0.1
23200	0	0	0	0	0	0.325	0	0	0.175
23600	0	0	0	0	0	0.4	0	0.05	0.275
24000	0	0	0	0	0	0.4	0	0.05	0.275
24400	0	0	0	0	0	0.4	0	0.05	0.275
24800	0	0	0	0	0	0.3	0	0.05	0.275
25200	0	0	0	0	0	0.3	0	0.05	0.275
25600	0	0	0	0	0	0.3	0	0.05	0.275
26000	0	0	0	0	0	0.225	0	0.1	0.375
26400	0	0	0	0	0	0.15	0	0.1	0.45
26800	0	0	0	0	0	0.075	0	0.1	0.45
27200	0	0	0	0	0	0.075	0	0.1	0.475
27600	0	0	0	0	0	0.075	0	0.05	0.475
28000	0	0	0	0	0	0.075	0	0.05	0.375
28400	0	0	0	0	0	0.075	0	0.05	0.375
28800	0	0	0	0	0	0.075	0	0.15	0.475
29200	0	0	0	0	0	0.15	0	0.15	0.475
29600	0	0	0	0	0	0.15	0	0.15	0.475
30000	0	0	0	0	0	0.15	0	0.1	0.475
30400	0	0	0	0	0	0.25	0	0.1	0.5
30800	0	0	0	0	0	0.25	0	0.1	0.5
31200	0	0	0	0	0	0.25	0	0.1	0.5
31600	0	0	0	0	0	0.175	0	0.15	0.5
32000	0	0	0	0	0	0.175	0	0.15	0.6
32400	0	0	0	0	0	0.175	0	0.15	0.675
32800	0	0	0	0	0	0.25	0	0.05	0.65
33200	0	0	0	0	0	0.175	0	0.05	0.725
33600	0	0	0	0	0	0.25	0	0.05	0.8
34000	0	0	0	0	0	0.25	0	0.05	0.7
34400	0	0	0	0	0	0.15	0	0.05	0.7
34800	0	0	0	0	0	0.15	0	0.05	0.7
35200	0	0	0	0	0	0.15	0	0.05	0.6
35600	0	0	0	0	0	0.15	0	0	0.5
36000	0	0	0	0	0	0.25	0	0.05	0.5
36400	0	0	0	0	0	0.25	0	0.05	0.5
36800	0	0	0	0	0	0.25	0	0.05	0.425
37200	0	0	0	0	0	0.25	0	0.05	0.425
37600	0	0	0	0	0	0.175	0	0.05	0.425
38000	0	0	0	0	0	0.175	0	0.05	0.525
38400	0	0	0	0	0	0.275	0	0.05	0.525
38800	0	0	0	0	0	0.275	0	0.05	0.6
39200	0	0	0	0	0	0.275	0	0.05	0.675
39600	0	0	0	0	0	0.275	0	0.05	0.675
40000	0	0	0	0	0	0.175	0	0	0.575
40400	0	0	0	0	0	0.25	0	0.05	0.6
40800	0	0	0	0	0	0.25	0	0.05	0.7
41200	0	0	0	0	0	0.325	0	0.1	0.725
41600	0	0	0	0	0	0.4	0	0.1	0.725
42000	0	0	0.075	0	0	0.5	0	0.1	0.7
42400	0	0	0.075	0	0	0.5	0	0.1	0.7
42800	0	0	0.15	0	0	0.6	0	0.2	0.725
43200	0	0	0.15	0	0	0.6	0	0.2	0.65
43600	0	0	0.15	0	0	0.6	0	0.2	0.75
44000	0	0	0.15	0	0.05	0.7	0	0.2	0.85
44400	0	0	0.15	0	0.05	0.7	0	0.15	0.75
44800	0	0	0.15	0	0.05	0.625	0	0.15	0.75
45200	0	0	0.15	0	0.05	0.65	0	0.1	0.725
45600	0	0	0.225	0	0.05	0.575	0	0.1	0.725
46000	0	0	0.15	0	0.05	0.475	0	0.1	0.65
46400	0	0	0.15	0	0.05	0.375	0	0.1	0.65
46800	0	0	0.075	0	0.05	0.275	0	0.05	0.65
47200	0	0	0.075	0	0.05	0.35	0	0.05	0.75
47600	0	0	0.15	0	0.05	0.35	0	0.05	0.65
48000	0	0	0.225	0	0	0.25	0	0.05	0.625
48400	0	0	0.225	0	0	0.175	0	0.05	0.7
48800	0	0	0.225	0	0	0.25	0	0.05	0.675
49200	0	0	0.225	0	0	0.25	0	0.05	0.6
49600	0	0	0.15	0	0	0.325	0	0.05	0.6
50000	0	0	0.225	0	0.05	0.425	0	0.05	0.6
50400	0	0	0.325	0	0.05	0.425	0	0.05	0.5
50800	0	0	0.325	0	0.05	0.425	0	0	0.4
51200	0	0	0.325	0	0.05	0.35	0	0	0.3
51600	0	0	0.25	0	0.05	0.35	0	0	0.3
52000	0	0	0.25	0	0.05	0.35	0	0	0.3
52400	0	0	0.325	0	0.05	0.45	0	0	0.225
52800	0	0	0.325	0	0.05	0.375	0	0	0.15
53200	0	0	0.425	0	0.05	0.375	0	0	0.15
53600	0	0	0.425	0	0.05	0.3	0	0	0.075
54000	0	0	0.35	0	0	0.2	0	0	0.15
54400	0	0	0.325	0	0	0.2	0	0	0.225
54800	0	0	0.325	0	0	0.2	0	0.1	0.325
55200	0	0	0.4	0	0	0.2	0	0.1	0.4
55600	0	0	0.475	0	0	0.275	0	0.1	0.5
56000	0	0	0.5	0	0	0.275	0	0.2	0.525
56400	0	0	0.525	0	0	0.175	0	0.2	0.625
56800	0	0	0.625	0	0	0.25	0	0.2	0.725
57200	0	0	0.625	0	0	0.225	0	0.2	0.725
57600	0	0	0.725	0	0	0.225	0	0.2	0.725
58000	0	0	0.825	0	0	0.3	0	0.3	0.75
58400	0	0	0.825	0	0	0.3	0	0.3	0.75
58800	0	0	0.9	0	0	0.3	0	0.2	0.65
59200	0	0.05	0.925	0	0	0.375	0	0.2	0.575
59600	0	0.1	0.95	0	0	0.375	0	0.2	0.475
60000	0	0.15	0.95	0	0	0.375	0	0.1	0.375
60400	0	0.2	0.95	0	0	0.375	0	0.1	0.35
60800	0	0.25	0.95	0	0	0.375	0	0.1	0.325
61200	0	0.25	0.95	0	0	0.3	0	0.1	0.425
61600	0	0.25	0.95	0	0	0.375	0	0.15	0.525
62000	0	0.25	0.95	0	0	0.375	0	0.05	0.525
62400	0	0.25	0.975	0	0	0.45	0	0.05	0.525
62800	0	0.25	1	0	0	0.525	0	0.05	0.525
63200	0	0.3	1	0	0	0.45	0.1	0.15	0.625
63600	0	0.3	1	0	0	0.475	0.1	0.15	0.625
64000	0	0.3	1	0	0	0.55	0.1	0.15	0.7
64400	0	0.25	1	0	0	0.55	0.1	0.15	0.725
64800	0	0.2	0.9	0	0	0.475	0.1	0.2	0.75
65200	0	0.25	0.9	0	0	0.575	0.1	0.3	0.75
65600	0	0.3	0.9	0	0	0.575	0.1	0.25	0.65
66000	0	0.35	0.9	0	0	0.5	0.1	0.25	0.65
66400	0	0.4	0.9	0	0	0.525	0.1	0.25	0.575
66800	0	0.5	0.9	0	0	0.45	0.1	0.3	0.675
67200	0	0.45	0.9	0	0	0.45	0	0.2	0.65
67600	0	0.5	0.9	0	0	0.35	0	0.2	0.75
68000	0	0.55	0.9	0	0	0.35	0	0.2	0.75
68400	0	0.65	0.9	0	0	0.35	0	0.2	0.65
68800	0	0.7	1	0	0	0.35	0	0.15	0.65
69200	0	0.75	1	0	0	0.325	0	0.05	0.65
69600	0	0.75	1	0	0	0.25	0	0.1	0.75
70000	0	0.8	1	0	0	0.25	0	0.1	0.65
70400	0.1	0.85	1	0	0	0.15	0	0.1	0.75
70800	0.1	0.8	1	0	0	0.15	0	0.05	0.65
71200	0.125	0.85	1	0	0	0.225	0	0.05	0.65
71600	0.125	0.85	1	0	0	0.3	0	0.05	0.625
72000	0.225	0.85	1	0	0	0.225	0	0.05	0.55
72400	0.325	0.85	1	0	0	0.225	0	0.05	0.625
72800	0.325	0.85	1	0	0.1	0.325	0	0.05	0.6
73200	0.325	0.85	1	0	0.1	0.325	0	0.05	0.6
73600	0.425	0.9	1	0	0.1	0.325	0	0.05	0.6
74000	0.525	0.9	1	0	0.1	0.325	0	0.05	0.7
74400	0.45	0.9	1	0	0.1	0.4	0	0.05	0.6
74800	0.45	0.9	1	0	0.1	0.4	0	0.1	0.7
75200	0.525	0.9	1	0	0.1	0.4	0	0.15	0.725
75600	0.625	0.9	1	0	0.1	0.325	0	0.15	0.65
76000	0.55	0.9	1	0	0.15	0.425	0	0.15	0.65
76400	0.55	0.9	1	0	0.15	0.5	0	0.15	0.675
76800	0.65	0.95	1	0	0.05	0.4	0	0.15	0.675
77200	0.65	0.95	1	0	0.05	0.325	0	0.15	0.575
77600	0.575	0.95	1	0	0.05	0.325	0	0.1	0.475
78000	0.575	0.95	1	0	0.05	0.325	0	0.1	0.45
78400	0.575	0.95	1	0	0.05	0.25	0	0.1	0.45
78800	0.6	1	1	0	0.05	0.25	0	0.05	0.35
79200	0.525	1	1	0	0.05	0.175	0	0	0.325
79600	0.525	1	1	0	0.05	0.175	0	0	0.325
80000	0.6	1	1	0	0	0.175	0	0	0.325
80400	0.6	1	1	0	0	0.2	0	0	0.225
80800	0.525	1	1	0	0	0.2	0	0	0.225
81200	0.525	1	1	0	0	0.2	0	0	0.3
81600	0.6	1	1	0	0	0.2	0	0.1	0.4
82000	0.6	1	1	0	0	0.2	0	0.1	0.325
82400	0.675	1	1	0	0	0.275	0	0.1	0.325
82800	0.75	1	1	0	0.1	0.375	0	0.1	0.4
83200	0.825	1	1	0	0.1	0.375	0	0.15	0.425
83600	0.825	1	1	0	0.1	0.375	0	0.15	0.5
84000	0.825	1	1	0	0.1	0.275	0	0.15	0.6
84400	0.825	1	1	0	0.1	0.175	0	0.15	0.6
84800	0.9	1	1	0	0.1	0.175	0	0.15	0.525
85200	1	1	1	0	0.1	0.175	0	0.15	0.45
85600	1	1	1	0	0.1	0.175	0	0.15	0.45
86000	1	1	1	0	0.1	0.175	0	0.15	0.45
86400	1	1	1	0	0.1	0.2	0	0.15	0.45
86800	1	1	1	0	0	0.1	0	0.15	0.375
87200	1	1	1	0	0	0.1	0	0.1	0.275
87600	1	1	1	0	0	0.1	0	0.1	0.275
88000	1	1	1	0	0	0.175	0	0.1	0.275
88400	1	1	1	0	0	0.25	0	0.1	0.275
88800	1	1	1	0	0	0.25	0	0.1	0.275
89200	1	1	1	0	0	0.325	0	0.1	0.35
89600	1	1	1	0	0	0.325	0	0	0.325
90000	1	1	1	0	0	0.425	0	0	0.325
90400	1	1	1	0	0	0.425	0	0	0.4
90800	0.925	1	1	0	0	0.5	0	0	0.4
91200	0.925	1	1	0	0.1	0.6	0	0.05	0.5
91600	0.925	1	1	0	0.1	0.6	0	0.05	0.5
92000	0.925	1	1	0	0.1	0.525	0	0.1	0.5
92400	0.925	1	1	0	0.1	0.45	0	0.15	0.6
92800	0.925	1	1	0	0.1	0.55	0	0.15	0.675
93200	0.925	1	1	0	0.1	0.475	0	0.2	0.7
93600	0.925	1	1	0	0.1	0.475	0	0.2	0.625
94000	0.925	1	1	0	0.1	0.375	0.025	0.3	0.725
94400	0.925	1	1	0	0.1	0.275	0.025	0.3	0.65
94800	1	1	1	0	0.1	0.2	0.025	0.4	0.75
95200	1	1	1	0	0	0.1	0.025	0.35	0.725
95600	1	1	1	0	0	0.175	0.025	0.35	0.65
96000	1	1	1	0	0	0.175	0.025	0.3	0.55
96400	1	1	1	0	0	0.275	0.025	0.25	0.525
96800	1	1	1	0	0	0.25	0.025	0.25	0.55
97200	1	1	1	0	0	0.35	0.025	0.2	0.55
97600	1	1	1	0	0	0.425	0.025	0.2	0.55
98000	1	1	1	0	0	0.425	0	0.1	0.45
98400	0.925	1	1	0	0	0.425	0	0.1	0.525
98800	0.925	1	1	0	0	0.425	0	0	0.425
99200	0.925	1	1	0	0	0.425	0	0.05	0.45
99600	0.925	1	1	0	0	0.45	0	0.05	0.45
100000	0.925	1	1	0	0	0.45	0	0.05	0.525
100400	0.925	1	1	0	0	0.425	0	0.05	0.45
100800	0.925	1	1	0	0	0.35	0	0.15	0.45
101200	0.925	1	1	0	0	0.325	0	0.15	0.45
101600	0.925	1	1	0	0	0.325	0	0.15	0.525
102000	0.925	1	1	0	0	0.325	0	0.25	0.625
102400	1	1	1	0	0	0.325	0	0.25	0.65
102800	1	1	1	0	0	0.4	0	0.25	0.65
103200	1	1	1	0	0	0.4	0	0.2	0.55
103600	1	1	1	0	0	0.3	0	0.2	0.65
104000	1	1	1	0	0	0.375	0	0.25	0.675
104400	1	1	1	0	0	0.3	0	0.25	0.75
104800	1	1	1	0	0	0.3	0	0.15	0.65
105200	1	1	1	0	0	0.3	0	0.15	0.625
105600	1	1	1	0	0	0.225	0	0.15	0.55
106000	1	1	1	0	0	0.3	0	0.05	0.525
106400	1	1	1	0	0	0.3	0	0.05	0.425
106800	1	1	1	0	0.05	0.325	0	0.05	0.425
107200	1	1	1	0	0.05	0.4	0	0.1	0.525
107600	1	1	1	0	0.05	0.475	0	0.1	0.425
108000	1	1	1	0	0.05	0.4	0	0.1	0.425
108400	1	1	1	0	0.05	0.4	0	0.1	0.45
108800	1	1	1	0	0.05	0.475	0	0.1	0.45
109200	1	1	1	0	0.1	0.5	0	0.1	0.45
109600	1	1	1	0	0.1	0.575	0	0.1	0.525
110000	1	1	1	0	0.1	0.6	0	0.1	0.45
110400	1	1	1	0	0.1	0.6	0	0.2	0.55
110800	1	1	1	0	0.05	0.5	0	0.2	0.55
111200	0.925	1	1	0	0.05	0.425	0	0.15	0.55
111600	0.925	1	1	0	0.05	0.425	0	0.15	0.625
112000	0.925	1	1	0	0.05	0.425	0	0.1	0.6
112400	0.925	1	1	0	0.05	0.425	0	0.1	0.575
112800	0.925	1	1	0	0.05	0.35	0	0.1	0.575
113200	0.925	1	1	0	0	0.25	0	0.1	0.6
113600	0.925	1	1	0	0	0.175	0	0.1	0.6
114000	0.925	1	1	0	0	0.175	0	0.1	0.6
114400	0.925	1	1	0	0	0.175	0	0	0.575
114800	0.925	1	1	0	0	0.175	0	0	0.675
115200	1	1	1	0	0	0.175	0	0	0.65
115600	1	1	1	0	0	0.2	0	0	0.575
116000	1	1	1	0	0	0.2	0	0	0.6
116400	1	1	1	0	0	0.2	0	0	0.6
116800	1	1	1	0	0	0.3	0	0	0.7
117200	1	1	1	0	0	0.3	0	0	0.675
117600	1	1	1	0	0	0.3	0	0.05	0.7
118000	1	1	1	0	0	0.2	0	0.05	0.7
118400	1	1	1	0	0	0.275	0	0.05	0.7
118800	1	1	1	0	0.05	0.375	0	0.05	0.675
119200	1	1	1	0	0.05	0.375	0	0.05	0.7
119600	1	1	1	0	0.05	0.275	0	0.05	0.7
120000	0.9	1	1	0	0.05	0.35	0	0.05	0.7
120400	0.9	1	1	0	0.05	0.35	0	0.05	0.725
120800	0.9	1	1	0	0.1	0.35	0	0.05	0.725
121200	0.9	1	1	0	0.1	0.35	0	0.1	0.75
121600	0.9	1	1	0	0.1	0.45	0	0.1	0.75
122000	0.9	1	1	0	0.1	0.45	0	0.1	0.825
122400	0.9	1	1	0	0.1	0.375	0	0.2	0.85
122800	0.9	1	1	0	0.05	0.35	0	0.2	0.775
123200	0.9	1	1	0	0.05	0.45	0	0.2	0.675
123600	0.9	1	1	0	0.05	0.45	0	0.2	0.675
124000	1	1	1	0	0.05	0.45	0	0.3	0.675
124400	0.925	1	1	0	0.05	0.55	0.025	0.4	0.675
124800	0.925	1	1	0	0.05	0.55	0.025	0.4	0.65
125200	0.925	1	1	0	0.05	0.625	0.025	0.4	0.65
125600	0.925	1	1	0	0.05	0.6	0.025	0.35	0.625
126000	0.925	1	1	0	0.05	0.675	0.025	0.35	0.65
126400	0.925	1	1	0	0.05	0.675	0.025	0.25	0.625
126800	0.925	1	1	0	0.05	0.6	0.025	0.25	0.625
127200	0.925	1	1	0	0.05	0.6	0.025	0.3	0.725
127600	0.925	1	1	0	0.1	0.7	0.025	0.3	0.725
128000	0.925	1	1	0	0.1	0.625	0.025	0.2	0.725
128400	1	1	1	0	0.1	0.525	0	0.1	0.725
128800	1	1	1	0	0.05	0.5	0	0.15	0.75
129200	1	1	1	0	0.15	0.525	0	0.1	0.65
129600	1	1	1	0	0.15	0.525	0	0.15	0.675
130000	1	1	1	0	0.15	0.45	0	0.15	0.575
130400	1	1	1	0	0.15	0.525	0	0.15	0.5
130800	1	1	1	0	0.15	0.525	0	0.15	0.6
131200	1	1	1	0	0.15	0.5	0	0.1	0.5
131600	1	1	1	0	0.1	0.475	0	0.15	0.6
132000	1	1	1	0	0.1	0.475	0	0.15	0.575
132400	1	1	1	0	0.1	0.575	0	0.15	0.55
132800	1	1	1	0	0.1	0.5	0	0.1	0.55
133200	1	1	1	0	0	0.5	0	0.1	0.625
133600	1	1	1	0	0	0.425	0	0.05	0.525
134000	1	1	1	0	0	0.425	0	0.1	0.625
134400	1	1	1	0	0	0.425	0	0.1	0.625
134800	1	1	1	0	0	0.525	0	0.1	0.525
135200	1	1	1	0	0	0.45	0	0.1	0.6
135600	1	1	1	0	0	0.375	0	0.05	0.575
136000	1	1	1	0	0	0.45	0	0.05	0.575
136400	1	1	1	0	0	0.35	0	0.05	0.575
136800	1	1	1	0	0	0.35	0	0.05	0.475
137200	1	1	1	0	0	0.25	0	0.05	0.4
137600	1	1	1	0	0	0.325	0	0.05	0.4
138000	1	1	1	0	0	0.4	0	0	0.3
138400	1	1	1	0	0	0.4	0	0	0.375
138800	1	1	1	0	0	0.3	0	0	0.375
139200	1	1	1	0	0	0.3	0	0.05	0.4
139600	1	1	1	0	0.05	0.4	0	0.05	0.425
140000	1	1	1	0	0.05	0.325	0	0.05	0.425
140400	1	1	1	0	0.05	0.325	0	0.05	0.45
140800	1	1	1	0	0.05	0.325	0.025	0.15	0.55
141200	1	1	1	0	0.05	0.4	0.025	0.15	0.55
141600	1	1	1	0	0.05	0.325	0.025	0.2	0.65
142000	1	1	1	0	0.05	0.35	0.025	0.2	0.75
142400	1	1	1	0	0.05	0.275	0.025	0.2	0.775
142800	1	1	1	0	0.05	0.375	0.025	0.2	0.85
143200	1	1	1	0	0.05	0.375	0.025	0.15	0.75
143600	0.9	1	1	0	0	0.275	0.025	0.15	0.725
144000	0.9	1	1	0	0	0.35	0.025	0.15	0.725
144400	0.9	1	1	0	0	0.35	0.025	0.25	0.725
144800	0.9	1	1	0	0	0.425	0	0.15	0.725
145200	0.9	1	1	0	0	0.425	0	0.15	0.825
145600	0.9	1	1	0	0	0.425	0	0.1	0.8
146000	0.9	1	1	0	0	0.425	0	0.2	0.8
146400	0.9	1	1	0	0	0.425	0	0.2	0.7
146800	0.9	1	1	0	0	0.325	0	0.2	0.625
147200	0.9	1	1	0	0	0.4	0	0.2	0.7
147600	1	1	1	0	0	0.4	0	0.2	0.625
148000	1	1	1	0	0	0.325	0	0.2	0.625
148400	1	1	1	0	0	0.325	0	0.15	0.625
148800	1	1	1	0	0	0.325	0	0.15	0.6
149200	1	1	1	0	0	0.25	0	0.15	0.6
149600	1	1	1	0	0	0.325	0	0.15	0.525
150000	1	1	1	0	0	0.3	0	0.05	0.525
150400	1	1	1	0	0	0.3	0	0.05	0.625
150800	1	1	1	0	0	0.3	0	0.05	0.725
151200	1	1	1	0	0	0.225	0	0.05	0.725
151600	1	1	1	0	0	0.225	0	0.05	0.725
152000	1	1	1	0	0	0.225	0	0.05	0.65
152400	1	1	1	0	0	0.225	0	0	0.65
152800	1	1	1	0	0	0.15	0	0	0.575
153200	1	1	1	0	0	0.15	0	0	0.475
153600	1	1	1	0	0	0.15	0	0	0.55
154000	1	1	1	0	0	0.075	0	0.05	0.55
154400	1	1	1	0	0.1	0.175	0	0.05	0.525
154800	1	1	1	0	0.15	0.275	0	0.05	0.425
155200	1	1	1	0	0.15	0.35	0	0.05	0.35
155600	1	1	1	0	0.15	0.35	0	0.05	0.45
156000	1	1	1	0	0.15	0.425	0	0.05	0.525
156400	1	1	1	0	0.15	0.425	0	0.05	0.425
156800	1	1	1	0	0.15	0.525	0	0.05	0.525
157200	0.925	1	1	0	0.15	0.525	0	0.05	0.525
157600	0.925	1	1	0	0.15	0.45	0	0.05	0.525
158000	0.925	1	1	0	0.15	0.45	0	0	0.425
158400	0.925	1	1	0	0.05	0.425	0	0	0.425
158800	0.925	1	1	0	0	0.325	0	0	0.425
159200	0.925	1	1	0	0	0.25	0	0	0.5
159600	0.925	1	1	0	0	0.25	0	0	0.5
160000	0.925	1	1	0	0	0.175	0	0	0.425
160400	0.925	1	1	0	0	0.175	0	0	0.5
160800	0.925	1	1	0	0	0.15	0	0	0.475
161200	1	1	1	0	0	0.15	0	0	0.55
161600	1	1	1	0	0	0.225	0	0	0.475
162000	1	1	1	0	0	0.225	0	0	0.475
162400	1	1	1	0	0	0.15	0	0.05	0.5
162800	1	1	1	0	0	0.15	0	0.1	0.6
163200	1	1	1	0	0	0.225	0	0.2	0.625
163600	1	1	1	0	0	0.225	0	0.2	0.525
164000	1	1	1	0	0	0.225	0	0.2	0.625
164400	1	1	1	0	0	0.225	0	0.2	0.55
164800	1	1	1	0	0	0.225	0	0.2	0.475
165200	1	1	1	0	0	0.225	0	0.2	0.475
165600	1	1	1	0	0	0.225	0	0.2	0.575
166000	1	1	1	0	0	0.3	0	0.2	0.575
166400	1	1	1	0	0	0.375	0	0.15	0.55
166800	1	1	1	0	0	0.375	0	0.1	0.45
167200	1	1	1	0	0	0.4	0	0	0.35
167600	1	1	1	0	0.1	0.5	0	0	0.35
168000	1	1	1	0	0.1	0.5	0	0	0.35
168400	1	1	1	0	0.1	0.5	0	0	0.45
168800	1	1	1	0	0.1	0.5	0	0	0.45
169200	1	1	1	0	0.1	0.6	0	0	0.375
169600	1	1	1	0	0.1	0.6	0	0	0.275
170000	1	1	1	0	0.1	0.625	0	0	0.35
170400	1	1	1	0	0.1	0.55	0	0	0.275
170800	1	1	1	0	0.1	0.55	0	0.05	0.375
171200	1	1	1	0	0.1	0.45	0	0.05	0.45
171600	1	1	1	0	0	0.35	0	0.05	0.55
172000	1	1	1	0	0	0.35	0	0.15	0.55
172400	1	1	1	0	0	0.45	0	0.15	0.525
172800	1	1	1	0	0	0.475	0	0.15	0.6
173200	1	1	1	0	0	0.375	0	0.15	0.675
173600	1	1	1	0	0	0.3	0	0.25	0.775
174000	1	1	1	0	0	0.2	0	0.3	0.8
174400	1	1	1	0	0	0.2	0	0.3	0.875
174800	1	1	1	0	0	0.3	0	0.25	0.85
175200	1	1	1	0	0	0.375	0	0.3	0.875
175600	1	1	1	0	0	0.475	0	0.3	0.85
176000	1	1	1	0	0.05	0.575	0	0.25	0.85
176400	1	1	1	0	0.05	0.575	0	0.25	0.875
176800	1	1	1	0	0.05	0.55	0	0.25	0.8
177200	1	1	1	0	0.05	0.55	0	0.25	0.725
177600	1	1	1	0	0.05	0.625	0	0.25	0.725
178000	1	1	1	0	0.05	0.7	0	0.25	0.725
178400	1	1	1	0	0.05	0.775	0	0.25	0.725
178800	1	1	1	0	0.05	0.675	0	0.25	0.725
179200	1	1	1	0	0.1	0.7	0	0.2	0.725
179600	1	1	1	0	0.1	0.675	0	0.2	0.725
180000	1	1	1	0	0.05	0.675	0	0.2	0.725
180400	1	1	1	0	0.05	0.575	0	0.2	0.625
180800	1	1	1	0	0.05	0.6	0	0.2	0.7
181200	1	1	1	0	0.05	0.6	0	0.2	0.775
181600	1	1	1	0	0.05	0.625	0	0.2	0.775
182000	1	1	1	0	0.05	0.65	0	0.2	0.775
182400	1	1	1	0	0.05	0.65	0	0.2	0.8
182800	1	1	1	0	0.05	0.65	0	0.25	0.825
183200	1	1	1	0	0	0.625	0	0.25	0.8
183600	1	1	1	0	0.05	0.65	0	0.25	0.825
184000	1	1	1	0	0.05	0.625	0	0.2	0.725
184400	1	1	1	0	0.05	0.7	0	0.2	0.8
184800	1	1	1	0	0.05	0.6	0	0.2	0.725
185200	1	1	1	0	0.05	0.675	0	0.2	0.75
185600	1	1	1	0	0.05	0.65	0	0.1	0.75
186000	1	1	1	0	0.05	0.55	0	0.05	0.725
186400	1	1	1	0	0.05	0.55	0	0.05	0.7
186800	1	1	1	0	0.05	0.625	0	0.05	0.7
187200	1	1	1	0	0.05	0.55	0	0.05	0.725
187600	1	1	1	0	0.1	0.55	0	0.05	0.7
188000	0.925	1	1	0	0.1	0.575	0	0.05	0.775
188400	0.925	1	1	0	0.15	0.6	0	0.05	0.8
188800	0.925	1	1	0	0.15	0.6	0	0.05	0.8
189200	0.925	1	1	0	0.15	0.6	0	0.05	0.7
189600	0.925	1	1	0	0.15	0.6	0	0.05	0.7
190000	0.925	1	1	0	0.15	0.6	0	0.05	0.7
190400	0.925	1	1	0	0.15	0.6	0	0.05	0.7
190800	0.925	1	1	0	0.2	0.625	0	0	0.7
191200	0.925	1	1	0	0.2	0.7	0	0.1	0.7
191600	0.925	1	1	0	0.1	0.675	0	0.1	0.625
192000	1	1	1	0	0.1	0.575	0	0.1	0.625
192400	1	1	1	0	0.05	0.55	0	0.1	0.525
192800	1	1	1	0	0.05	0.625	0	0.1	0.6
193200	1	1	1	0	0.05	0.55	0	0.1	0.7
193600	1	1	1	0	0.05	0.475	0	0.1	0.675
194000	1	1	1	0	0.05	0.575	0	0.1	0.6
194400	1	1	1	0	0.05	0.6	0	0.1	0.525
194800	1	1	1	0	0	0.5	0	0.15	0.525
195200	1	1	1	0	0	0.425	0	0.05	0.425
195600	1	1	1	0	0.05	0.45	0	0.05	0.525
196000	1	1	1	0	0.1	0.55	0	0.05	0.55
196400	1	1	1	0	0.1	0.55	0	0.05	0.55
196800	1	1	1	0	0.1	0.55	0	0.1	0.575
197200	1	1	1	0	0.1	0.55	0	0.1	0.475
197600	1	1	1	0	0.1	0.625	0	0.1	0.475
198000	1	1	1	0	0.1	0.525	0	0.1	0.475
198400	1	1	1	0	0.15	0.525	0	0.1	0.55
198800	1	1	1	0	0.15	0.525	0	0.05	0.45
199200	1	1	1	0	0.15	0.525	0	0.05	0.525
199600	1	1	1	0	0.1	0.5	0	0.05	0.425
200000	1	1	1	0	0.05	0.4	0	0.05	0.4
200400	1	1	1	0	0.1	0.425	0	0.05	0.475
200800	1	1	1	0	0.1	0.35	0	0.1	0.475
201200	0.925	1	1	0	0.1	0.35	0	0.2	0.575
201600	0.925	1	1	0	0.1	0.375	0	0.25	0.6
202000	0.925	1	1	0.025	0.2	0.475	0	0.3	0.7
202400	0.925	1	1	0.025	0.15	0.45	0	0.35	0.725
202800	0.925	1	1	0.025	0.15	0.45	0	0.35	0.725
203200	0.925	1	1	0.025	0.2	0.55	0	0.4	0.75
203600	0.925	1	1	0.025	0.2	0.55	0	0.4	0.75
204000	0.925	1	1	0.025	0.2	0.65	0	0.4	0.675
204400	0.925	1	1	0.025	0.15	0.625	0	0.45	0.7
204800	0.925	1	1	0.025	0.15	0.7	0	0.35	0.6
205200	1	1	1	0.025	0.15	0.7	0	0.25	0.6
205600	1	1	1	0.025	0.15	0.675	0	0.3	0.6
206000	1	1	1	0	0.05	0.575	0	0.25	0.6
206400	1	1	1	0	0.05	0.5	0	0.2	0.5
206800	1	1	1	0	0.05	0.575	0	0.2	0.5
207200	0.925	1	1	0	0	0.475	0	0.15	0.475
207600	0.925	1	1	0	0	0.4	0	0.25	0.575
208000	0.925	1	1	0	0.05	0.4	0	0.25	0.575
208400	0.925	1	1	0	0.05	0.325	0	0.2	0.475
208800	0.925	1	1	0	0.05	0.325	0	0.2	0.575
209200	0.925	1	1	0	0.05	0.425	0	0.2	0.55
209600	0.925	1	1	0	0.05	0.425	0	0.1	0.45
210000	0.925	1	1	0	0.05	0.5	0	0.1	0.425
210400	0.925	1	1	0	0.05	0.6	0	0.15	0.525
210800	0.925	1	1	0	0.1	0.625	0	0.15	0.6
211200	1	1	1	0	0.1	0.625	0	0.15	0.625
211600	1	1	1	0	0.1	0.7	0	0.05	0.525
212000	1	1	1	0	0.05	0.6	0	0.05	0.525
212400	1	1	1	0	0.05	0.6	0	0.05	0.525
212800	1	1	1	0	0.05	0.525	0	0.05	0.525
213200	1	1	1	0	0.05	0.425	0	0.05	0.55
213600	1	1	1	0	0.05	0.35	0	0.15	0.65
214000	1	1	1	0	0.05	0.275	0	0.15	0.675
214400	1	1	1	0	0.05	0.275	0	0.1	0.675
214800	1	1	1	0	0.1	0.275	0	0.1	0.675
215200	1	1	1	0	0.1	0.35	0.025	0.2	0.675
215600	1	1	1	0	0.15	0.375	0.025	0.2	0.675
216000	1	1	1	0	0.2	0.475	0.025	0.2	0.675
216400	1	1	1	0	0.2	0.475	0.025	0.2	0.75
216800	1	1	1	0	0.2	0.575	0.025	0.2	0.725
217200	1	1	1	0	0.25	0.675	0.025	0.2	0.625
217600	1	1	1	0	0.25	0.675	0.025	0.1	0.525
218000	1	1	1	0	0.25	0.675	0.025	0.1	0.425
218400	1	1	1	0	0.25	0.65	0.025	0.1	0.4
218800	1	1	1	0	0.15	0.65	0.025	0.1	0.425
219200	1	1	1	0	0.15	0.575	0	0	0.325
219600	1	1	1	0	0.1	0.475	0	0	0.325
220000	1	1	1	0	0.05	0.375	0	0	0.425
220400	1	1	1	0	0.05	0.375	0	0	0.35
220800	1	1	1	0	0.05	0.275	0	0	0.275
221200	1	1	1	0	0	0.275	0	0	0.375
221600	1	1	1	0	0	0.275	0	0	0.375
222000	1	1	1	0	0	0.275	0	0.05	0.475
222400	1	1	1	0	0	0.2	0	0.05	0.475
222800	1	1	1	0	0	0.175	0	0.05	0.375
223200	1	1	1	0	0	0.175	0	0.05	0.375
223600	1	1	1	0	0	0.25	0	0.05	0.375
224000	1	1	1	0	0	0.25	0	0.05	0.275
224400	1	1	1	0	0	0.25	0.025	0.15	0.375
224800	1	1	1	0	0	0.25	0.025	0.15	0.475
225200	1	1	1	0	0	0.15	0.025	0.15	0.475
225600	1	1	1	0	0	0.15	0.025	0.15	0.475
226000	1	1	1	0	0	0.15	0.025	0.1	0.375
226400	1	1	1	0	0	0.225	0.025	0.1	0.4
226800	1	1	1	0	0	0.15	0.025	0.1	0.475
227200	1	1	1	0	0	0.15	0.025	0.15	0.575
227600	1	1	1	0	0.05	0.175	0.025	0.15	0.575
228000	1	1	1	0	0.05	0.25	0.025	0.15	0.575
228400	1	1	1	0	0.05	0.25	0	0.05	0.475
228800	1	1	1	0	0.05	0.35	0	0.1	0.475
229200	1	1	1	0	0.05	0.35	0	0.2	0.475
229600	1	1	1	0	0.05	0.35	0	0.2	0.475
230000	1	1	1	0	0.05	0.425	0	0.2	0.475
230400	1	1	1	0	0.05	0.425	0	0.2	0.45
230800	1	1	1	0	0.05	0.5	0	0.2	0.45
231200	1	1	1	0	0.05	0.575	0.025	0.25	0.45
231600	1	1	1	0	0	0.475	0.025	0.25	0.55
232000	1	1	1	0	0.05	0.5	0.025	0.3	0.65
232400	1	1	1	0	0.05	0.5	0.025	0.3	0.725
232800	1	1	1	0	0.1	0.5	0.025	0.25	0.625
233200	1	1	1	0	0.1	0.5	0.025	0.15	0.6
233600	1	1	1	0	0.1	0.6	0.025	0.2	0.7
234000	1	1	1	0	0.1	0.625	0.025	0.2	0.8
234400	1	1	1	0	0.1	0.55	0.025	0.2	0.8
234800	1	1	1	0	0.1	0.475	0.05	0.3	0.825
235200	1	1	1	0	0.1	0.4	0.025	0.25	0.825
235600	1	1	1	0	0.1	0.4	0.025	0.25	0.8
236000	1	1	1	0	0.05	0.3	0.025	0.25	0.8
236400	1	1	1	0	0.05	0.4	0.025	0.25	0.725
236800	1	1	1	0	0	0.375	0.025	0.25	0.725
237200	1	1	1	0	0	0.45	0.025	0.25	0.65
237600	1	1	1	0	0	0.425	0.025	0.2	0.55
238000	1	1	1	0	0	0.425	0.025	0.2	0.525
238400	1	1	1	0	0	0.425	0.025	0.2	0.45
238800	1	1	1	0	0	0.5	0	0.1	0.35
239200	1	1	1	0	0	0.575	0	0.05	0.325
239600	1	1	1	0	0	0.675	0	0.1	0.35
240000	1	1	1	0	0	0.775	0	0.1	0.35
240400	1	1	1	0	0.05	0.775	0	0.1	0.35
240800	1	1	1	0	0.05	0.7	0	0.1	0.425
241200	1	1	1	0	0.05	0.725	0	0.1	0.5
241600	1	1	1	0	0.05	0.65	0	0.1	0.6
242000	1	1	1	0	0.05	0.55	0	0.1	0.525
242400	1	1	1	0	0.05	0.55	0	0.1	0.525
242800	1	1	1	0	0.1	0.575	0	0.1	0.525
243200	1	1	1	0	0.1	0.6	0	0.1	0.55
243600	1	1	1	0	0.1	0.575	0	0.1	0.55
244000	1	1	1	0	0.15	0.575	0	0.1	0.55
244400	1	1	1	0	0.1	0.55	0	0.15	0.65
244800	1	1	1	0	0.1	0.65	0	0.15	0.675
245200	1	1	1	0	0.1	0.65	0	0.15	0.6
245600	1	1	1	0	0.1	0.75	0	0.15	0.6
246000	1	1	1	0	0.1	0.825	0	0.15	0.6
246400	1	1	1	0	0.1	0.9	0	0.15	0.6
246800	1	1	1	0	0.05	0.875	0	0.15	0.675
247200	1	1	1	0	0.05	0.775	0	0.15	0.675
247600	1	1	1	0	0.05	0.7	0	0.1	0.65
248000	1	1	1	0	0	0.6	0	0.05	0.55
248400	1	1	1	0	0	0.625	0.025	0.1	0.55
248800	1	1	1	0	0	0.625	0.05	0.2	0.55
249200	1	1	1	0	0	0.525	0.05	0.2	0.55
249600	1	1	1	0	0	0.425	0.05	0.2	0.55
250000	1	1	1	0	0	0.45	0.05	0.2	0.625
250400	1	1	1	0	0	0.375	0.05	0.2	0.7
250800	1	1	1	0	0	0.375	0.05	0.25	0.725
251200	1	1	1	0	0	0.475	0.05	0.25	0.7
251600	1	1	1	0.025	0.1	0.575	0.05	0.25	0.7
252000	1	1	1	0.025	0.1	0.575	0.05	0.25	0.8
252400	1	1	1	0.025	0.1	0.575	0.025	0.15	0.775
252800	1	1	1	0.025	0.1	0.55	0	0.05	0.675
253200	1	1	1	0.025	0.1	0.55	0	0.05	0.675
253600	1	1	1	0.025	0.1	0.55	0	0.05	0.575
254000	1	1	1	0.025	0.1	0.55	0	0.05	0.5
254400	1	1	1	0.025	0.1	0.55	0	0.05	0.5
254800	1	1	1	0.025	0.1	0.575	0	0	0.475
255200	1	1	1	0.025	0.1	0.475	0	0	0.475
255600	1	1	1	0	0	0.375	0	0	0.4
256000	1	1	1	0	0	0.375	0	0	0.4
256400	1	1	1	0	0	0.35	0	0	0.4
256800	1	1	1	0	0	0.275	0.025	0.1	0.5
257200	1	1	1	0	0	0.275	0.025	0.1	0.6
257600	1	1	1	0	0	0.35	0.025	0.1	0.675
258000	1	1	1	0	0	0.25	0.025	0.1	0.675
258400	1	1	1	0	0	0.35	0.025	0.1	0.675
258800	1	1	1	0	0	0.25	0.025	0.1	0.6
259200	1	1	1	0	0	0.35	0.025	0.1	0.6
259600	1	1	1	0	0.05	0.45	0.025	0.1	0.6
260000	1	1	1	0	0.05	0.45	0.025	0.1	0.5
260400	1	1	1	0	0.05	0.475	0.025	0.1	0.5
260800	1	1	1	0	0.05	0.55	0	0	0.5
261200	1	1	1	0	0.15	0.65	0	0.05	0.5
261600	1	1	1	0	0.15	0.575	0	0.05	0.5
262000	1	1	1	0	0.25	0.675	0	0.05	0.575
262400	1	1	1	0	0.25	0.675	0	0.05	0.5
262800	1	1	1	0	0.25	0.675	0	0.05	0.5
263200	1	1	1	0	0.25	0.575	0	0.05	0.425
263600	1	1	1	0	0.2	0.475	0	0.05	0.5
264000	1	1	1	0	0.2	0.55	0	0.05	0.5
264400	1	1	1	0	0.25	0.55	0.1	0.15	0.525
264800	1	1	1	0	0.25	0.575	0.1	0.15	0.425
265200	1	1	1	0	0.15	0.575	0.1	0.1	0.325
265600	1	1	1	0	0.15	0.575	0.1	0.15	0.35
266000	1	1	1	0	0.05	0.475	0.1	0.15	0.275
266400	1	1	1	0	0.05	0.45	0.1	0.15	0.375
266800	1	1	1	0	0.05	0.55	0.1	0.15	0.475
267200	1	1	1	0	0.05	0.55	0.1	0.15	0.475
267600	1	1	1	0	0.05	0.55	0.1	0.15	0.5
268000	1	1	1	0	0.05	0.575	0.1	0.15	0.5
268400	1	1	1	0	0	0.55	0	0.05	0.475
268800	1	1	1	0	0	0.525	0	0.05	0.475
269200	1	1	1	0	0	0.425	0	0.05	0.475
269600	1	1	1	0	0	0.5	0	0	0.475
270000	1	1	1	0	0	0.5	0	0	0.475
270400	1	1	1	0	0	0.425	0	0	0.375
270800	1	1	1	0	0	0.325	0	0	0.275
271200	1	1	1	0	0	0.4	0	0	0.35
271600	1	1	1	0	0	0.475	0	0.05	0.35
272000	1	1	1	0	0.1	0.475	0	0.05	0.425
272400	1	1	1	0	0.1	0.475	0	0.05	0.35
272800	1	1	1	0	0.1	0.4	0	0.05	0.45
273200	1	1	1	0	0.15	0.5	0	0.05	0.45
273600	1	1	1	0	0.15	0.425	0	0.1	0.45
274000	1	1	1	0	0.15	0.425	0	0.1	0.45
274400	1	1	1	0	0.15	0.425	0	0.1	0.45
274800	1	1	1	0	0.15	0.425	0	0.1	0.525
275200	1	1	1	0	0.15	0.425	0	0.1	0.525
275600	1	1	1	0	0.15	0.35	0	0.05	0.5
276000	1	1	1	0	0.05	0.35	0	0.05	0.5
276400	1	1	1	0	0.05	0.275	0	0.05	0.575
276800	1	1	1	0	0.05	0.375	0	0.05	0.55
277200	1	1	1	0	0	0.275	0	0.05	0.65
277600	1	1	1	0	0	0.35	0	0	0.55
278000	1	1	1	0	0	0.45	0	0.1	0.65
278400	1	1	1	0	0	0.525	0	0.1	0.65
278800	1	1	1	0	0.05	0.625	0	0.1	0.575
279200	1	1	1	0	0.05	0.625	0	0.1	0.575
279600	1	1	1	0	0.05	0.7	0	0.1	0.6
280000	1	1	1	0	0.05	0.675	0	0.1	0.6
280400	1	1	1	0	0.1	0.775	0	0.15	0.625
280800	1	1	1	0	0.1	0.675	0	0.15	0.55
281200	1	1	1	0	0.1	0.675	0	0.15	0.55
281600	1	1	1	0	0.1	0.6	0	0.15	0.55
282000	1	1	1	0	0.1	0.5	0	0.05	0.525
282400	1	1	1	0	0.1	0.425	0	0.05	0.625
282800	1	1	1	0	0.05	0.325	0	0.1	0.725
283200	1	1	1	0	0.05	0.35	0	0.2	0.75
283600	1	1	1	0	0.05	0.275	0	0.2	0.65
284000	1	1	1	0	0.05	0.3	0	0.2	0.575
284400	1	1	1	0	0.05	0.3	0	0.2	0.575
284800	1	1	1	0	0.05	0.3	0.025	0.3	0.675
285200	1	1	1	0	0.15	0.4	0.025	0.3	0.575
285600	0.925	1	1	0	0.15	0.4	0.025	0.3	0.575
286000	0.925	1	1	0	0.15	0.475	0.025	0.35	0.6
286400	0.925	1	1	0	0.15	0.475	0.025	0.35	0.575
286800	0.925	1	1	0	0.15	0.575	0.025	0.3	0.575
287200	0.925	1	1	0	0.15	0.475	0.025	0.2	0.55
287600	0.925	1	1	0	0.15	0.475	0.025	0.2	0.625
288000	0.925	1	1	0	0.15	0.375	0.05	0.3	0.725
288400	0.925	1	1	0	0.1	0.35	0.05	0.25	0.625
288800	0.925	1	1	0	0.1	0.425	0.05	0.25	0.625
289200	0.925	1	1	0	0	0.325	0.05	0.25	0.725
289600	1	1	1	0	0	0.4	0.05	0.25	0.825
290000	1	1	1	0	0	0.325	0.05	0.2	0.725
290400	1	1	1	0	0	0.325	0.05	0.25	0.75
290800	1	1	1	0	0	0.325	0.05	0.25	0.725
291200	1	1	1	0	0	0.325	0.05	0.25	0.75
291600	1	1	1	0	0	0.325	0.05	0.25	0.675
292000	1	1	1	0	0	0.4	0.025	0.15	0.675
292400	1	1	1	0	0	0.325	0.025	0.15	0.775
292800	1	1	1	0	0	0.325	0	0.05	0.675
293200	1	1	1	0	0	0.325	0	0.05	0.65
293600	1	1	1	0	0	0.325	0	0.05	0.625
294000	1	1	1	0	0	0.325	0	0.05	0.625
294400	1	1	1	0	0.05	0.425	0	0	0.6
294800	1	1	1	0	0.05	0.325	0	0	0.625
295200	1	1	1	0	0.05	0.4	0	0	0.525
295600	1	1	1	0	0.05	0.4	0	0	0.6
296000	1	1	1	0	0.05	0.425	0	0	0.575
296400	1	1	1	0	0.05	0.425	0	0	0.575
296800	1	1	1	0	0.05	0.45	0	0.05	0.675
297200	1	1	1	0	0.1	0.55	0.1	0.15	0.7
297600	1	1	1	0	0.15	0.575	0.1	0.15	0.725
298000	1	1	1	0	0.15	0.575	0.1	0.15	0.825
298400	1	1	1	0	0.1	0.475	0.1	0.15	0.825
298800	1	1	1	0	0.1	0.575	0.1	0.15	0.825
299200	1	1	1	0	0.1	0.575	0.1	0.15	0.825
299600	1	1	1	0	0.1	0.65	0.1	0.15	0.75
300000	1	1	1	0	0.1	0.625	0.1	0.15	0.675
300400	1	1	1	0	0.1	0.625	0.1	0.2	0.675
300800	1	1	1	0	0.1	0.525	0.1	0.15	0.65
301200	1	1	1	0	0.05	0.525	0	0.05	0.625
301600	1	1	1	0	0	0.525	0	0.05	0.525
302000	1	1	1	0	0	0.525	0	0.05	0.425
302400	1	1	1	0	0.1	0.625	0	0.15	0.45
302800	1	1	1	0	0.15	0.625	0	0.15	0.35
303200	1	1	1	0	0.15	0.55	0	0.2	0.45
303600	1	1	1	0	0.15	0.475	0	0.2	0.45
304000	1	1	1	0	0.15	0.475	0	0.2	0.55
304400	1	1	1	0	0.15	0.575	0	0.2	0.55
304800	1	1	1	0	0.15	0.65	0	0.25	0.575
305200	1	1	1	0	0.15	0.65	0	0.3	0.6
305600	1	1	1	0	0.15	0.55	0	0.3	0.675
306000	1	1	1	0	0.15	0.55	0	0.4	0.775
306400	1	1	1	0	0.05	0.45	0	0.3	0.675
306800	1	1	1	0	0	0.425	0	0.3	0.675
307200	1	1	1	0	0	0.425	0	0.25	0.65
307600	1	1	1	0	0	0.525	0	0.25	0.65
308000	1	1	1	0	0	0.45	0	0.25	0.65
308400	1	1	1	0	0	0.425	0	0.25	0.65
308800	1	1	1	0	0	0.45	0	0.2	0.65
309200	1	1	1	0	0	0.35	0	0.15	0.55
309600	1	1	1	0	0	0.35	0	0.15	0.55
310000	1	1	1	0	0.05	0.45	0	0.05	0.525
310400	1	1	1	0	0.05	0.45	0	0.05	0.6
310800	1	1	1	0	0.05	0.45	0	0.05	0.6
311200	1	1	1	0	0.05	0.45	0	0.05	0.625
311600	1	1	1	0	0.05	0.45	0	0.05	0.625
312000	1	1	1	0	0.1	0.55	0	0.05	0.525
312400	1	1	1	0	0.1	0.475	0	0.05	0.525
312800	1	1	1	0	0.1	0.45	0	0.05	0.525
313200	1	1	1	0	0.1	0.45	0	0.05	0.625
313600	1	1	1	0	0.1	0.525	0	0.05	0.55
314000	1	1	1	0	0.05	0.525	0	0.05	0.475
314400	1	1	1	0	0.05	0.6	0	0.05	0.475
314800	1	1	1	0	0.05	0.6	0	0.1	0.575
315200	1	1	1	0	0.05	0.7	0	0.1	0.575
315600	1	1	1	0	0.05	0.7	0	0.1	0.575
316000	1	1	1	0	0	0.675	0	0.1	0.575
316400	1	1	1	0	0	0.675	0	0.1	0.575
316800	1	1	1	0	0	0.6	0	0.15	0.575
317200	1	1	1	0	0	0.7	0	0.15	0.475
317600	1	1	1	0	0	0.725	0	0.15	0.475
318000	1	1	1	0	0	0.725	0	0.15	0.55
318400	1	1	1	0	0	0.75	0	0.15	0.55
318800	1	1	1	0	0	0.675	0	0.2	0.55
319200	1	1	1	0	0	0.575	0	0.2	0.45
319600	1	1	1	0	0	0.55	0	0.2	0.45
320000	1	1	1	0	0	0.475	0	0.2	0.55
320400	1	1	1	0	0	0.475	0	0.15	0.55
320800	1	1	1	0	0.05	0.575	0	0.1	0.525
321200	1	1	1	0	0.05	0.475	0	0.1	0.525
321600	1	1	1	0	0.05	0.45	0	0.1	0.525
322000	1	1	1	0	0.05	0.35	0	0.1	0.525
322400	1	1	1	0	0.1	0.35	0	0.1	0.525
322800	1	1	1	0	0.1	0.35	0	0.05	0.525
323200	1	1	1	0	0.1	0.35	0	0.05	0.6
323600	1	1	1	0	0.1	0.275	0	0.05	0.675
324000	1	1	1	0	0.1	0.275	0	0.05	0.675
324400	1	1	1	0	0.1	0.275	0	0.05	0.675
324800	1	1	1	0	0.05	0.175	0	0.05	0.6
325200	1	1	1	0	0.05	0.175	0	0.05	0.6
325600	1	1	1	0	0.05	0.1	0	0.1	0.7
326000	1	1	1	0	0.05	0.1	0	0.1	0.625
326400	1	1	1	0	0	0.075	0	0.1	0.625
326800	1	1	1	0	0	0.175	0	0.05	0.625
327200	1	1	1	0	0	0.25	0	0.05	0.65
327600	1	1	1	0	0.05	0.35	0	0.05	0.575
328000	1	1	1	0	0.05	0.425	0	0.05	0.55
328400	1	1	1	0	0.05	0.525	0	0.05	0.45
328800	1	1	1	0	0.05	0.525	0	0.05	0.55
329200	1	1	1	0	0.05	0.525	0	0.05	0.65
329600	1	1	1	0	0.05	0.525	0	0	0.625
330000	1	1	1	0	0.05	0.6	0	0.05	0.725
330400	1	1	1	0	0.1	0.625	0	0.05	0.65
330800	1	1	1	0	0.1	0.525	0	0.05	0.625
331200	1	1	1	0	0.1	0.525	0	0.05	0.525
331600	1	1	1	0	0.1	0.525	0	0.15	0.625
332000	1	1	1	0	0.1	0.45	0	0.15	0.55
332400	1	1	1	0	0.1	0.45	0	0.15	0.55
332800	1	1	1	0	0.1	0.45	0	0.15	0.45
333200	1	1	1	0	0.2	0.55	0	0.15	0.425
333600	1	1	1	0	0.2	0.55	0	0.15	0.425
334000	1	1	1	0	0.2	0.475	0	0.1	0.325
334400	1	1	1	0	0.15	0.475	0	0.1	0.4
334800	1	1	1	0	0.15	0.55	0	0.1	0.325
335200	1	1	1	0	0.15	0.55	0	0.15	0.425
335600	1	1	1	0	0.1	0.45	0	0.05	0.425
336000	1	1	1	0	0.1	0.45	0	0.05	0.5
336400	1	1	1	0	0.1	0.425	0	0.05	0.6
336800	1	1	1	0	0.15	0.525	0	0.05	0.675
337200	1	1	1	0	0.05	0.525	0	0.05	0.6
337600	1	1	1	0	0.05	0.525	0	0.05	0.525
338000	1	1	1	0	0.05	0.525	0	0.05	0.6
338400	1	1	1	0	0.05	0.425	0	0.05	0.525
338800	1	1	1	0	0.05	0.35	0	0.05	0.6
339200	1	1	1	0	0.05	0.275	0	0	0.6
339600	1	1	1	0	0.05	0.375	0	0	0.575
340000	1	1	1	0	0.05	0.45	0	0	0.575
340400	1	1	1	0	0.05	0.45	0	0	0.55
340800	1	1	1	0	0	0.425	0	0	0.55
341200	1	1	1	0	0	0.325	0	0	0.55
341600	1	1	1	0	0	0.325	0	0	0.625
342000	1	1	1	0	0	0.425	0	0	0.65
342400	1	1	1	0	0	0.525	0	0	0.65
342800	1	1	1	0	0	0.525	0	0	0.65
343200	1	1	1	0	0	0.525	0	0	0.55
343600	1	1	1	0	0	0.425	0	0	0.475
344000	1	1	1	0	0	0.35	0	0	0.475
344400	1	1	1	0	0	0.35	0	0	0.4
344800	1	1	1	0	0	0.275	0	0	0.325
345200	1	1	1	0	0.05	0.375	0	0	0.425
345600	1	1	1	0	0.05	0.375	0	0	0.425
346000	1	1	1	0	0.05	0.375	0	0.05	0.425
346400	1	1	1	0	0.05	0.375	0	0.05	0.5
346800	1	1	1	0	0.15	0.475	0	0.05	0.5
347200	1	1	1	0	0.15	0.475	0	0.1	0.6
347600	1	1	1	0	0.15	0.475	0	0.1	0.675
348000	1	1	1	0	0.15	0.475	0	0.1	0.6
348400	1	1	1	0	0.25	0.5	0	0.1	0.7
348800	1	1	1	0	0.3	0.6	0	0.1	0.7
349200	1	1	1	0	0.25	0.5	0	0.1	0.675
349600	1	1	1	0	0.25	0.5	0	0.1	0.675
350000	1	1	1	0	0.25	0.4	0	0.05	0.575
350400	1	1	1	0	0.25	0.375	0	0.1	0.6
350800	1	1	1	0	0.15	0.275	0	0.1	0.6
351200	1	1	1	0	0.15	0.275	0	0.15	0.6
351600	1	1	1	0	0.15	0.35	0	0.15	0.6
352000	1	1	1	0	0.15	0.425	0	0.15	0.7
352400	1	1	1	0	0.05	0.325	0	0.15	0.675
352800	1	1	1	0	0	0.225	0	0.15	0.775
353200	1	1	1	0	0	0.225	0	0.15	0.7
353600	1	1	1	0	0	0.225	0	0.15	0.7
354000	1	1	1	0	0	0.325	0	0.15	0.7
354400	1	1	1	0	0	0.25	0	0.1	0.6
354800	1	1	1	0	0.05	0.35	0	0.1	0.625
355200	1	1	1	0	0.15	0.45	0	0	0.6
355600	1	1	1	0	0.2	0.475	0	0	0.6
356000	1	1	1	0	0.2	0.475	0	0	0.575
356400	1	1	1	0	0.2	0.475	0	0	0.6
356800	1	1	1	0	0.2	0.475	0	0.05	0.6
357200	1	1	1	0	0.2	0.575	0	0.05	0.675
357600	1	1	1	0	0.2	0.575	0	0.1	0.7
358000	1	1	1	0	0.25	0.575	0	0.2	0.8
358400	1	1	1	0	0.25	0.575	0	0.2	0.8
358800	1	1	1	0	0.2	0.55	0	0.2	0.7
359200	1	1	1	0	0.1	0.45	0	0.2	0.625
359600	1	1	1	0	0.15	0.45	0	0.2	0.65
360000	1	1	1	0	0.15	0.375	0	0.2	0.65
360400	1	1	1	0	0.15	0.45	0	0.2	0.65
360800	1	1	1	0	0.15	0.55	0	0.15	0.625
361200	1	1	1	0	0.15	0.525	0	0.15	0.625
361600	1	1	1	0	0.15	0.6	0	0.2	0.625
362000	1	1	1	0	0.1	0.6	0	0.1	0.6
362400	1	1	1	0	0.1	0.675	0	0.1	0.675
362800	1	1	1	0	0.1	0.675	0	0.1	0.675
363200	1	1	1	0	0.1	0.675	0	0.15	0.775
363600	1	1	1	0	0	0.575	0	0.15	0.775
364000	1	1	1	0	0.05	0.675	0	0.2	0.8
364400	1	1	1	0	0.05	0.6	0	0.3	0.8
364800	1	1	1	0	0.05	0.5	0	0.35	0.825
365200	1	1	1	0	0.05	0.425	0	0.35	0.825
365600	1	1	1	0	0.05	0.35	0	0.25	0.725
366000	1	1	1	0	0.05	0.35	0	0.25	0.725
366400	1	1	1	0	0.05	0.35	0	0.25	0.65
366800	1	1	1	0	0.05	0.275	0	0.25	0.75
367200	1	1	1	0	0.1	0.375	0	0.2	0.725
367600	1	1	1	0	0.1	0.375	0	0.2	0.625
368000	1	1	1	0	0.05	0.275	0	0.15	0.625
368400	1	1	1	0	0.05	0.275	0	0.05	0.525
368800	1	1	1	0	0.05	0.275	0	0.05	0.525
369200	1	1	1	0	0.05	0.275	0	0.05	0.45
369600	1	1	1	0	0.05	0.275	0	0.05	0.525
370000	1	1	1	0	0.05	0.25	0	0.05	0.525
370400	1	1	1	0	0.05	0.175	0	0.05	0.6
370800	1	1	1	0	0.05	0.175	0	0.05	0.6
371200	1	1	1	0	0.1	0.175	0	0.05	0.525
371600	1	1	1	0	0.1	0.175	0	0.05	0.625
372000	1	1	1	0	0.1	0.175	0	0.05	0.6
372400	1	1	1	0	0.1	0.25	0	0.05	0.7
372800	1	1	1	0	0.1	0.25	0	0	0.675
373200	1	1	1	0	0.1	0.25	0	0	0.675
373600	1	1	1	0	0.1	0.325	0	0	0.675
374000	1	1	1	0	0.1	0.325	0	0.05	0.7
374400	1	1	1	0	0.1	0.325	0	0.05	0.7
374800	1	1	1	0	0.15	0.425	0	0.1	0.7
375200	1	1	1	0	0.05	0.325	0	0.1	0.7
375600	1	1	1	0	0.05	0.325	0	0.1	0.6
376000	1	1	1	0	0.05	0.325	0	0.1	0.6
376400	1	1	1	0	0.05	0.35	0	0.15	0.6
376800	1	1	1	0	0.05	0.35	0	0.15	0.6
377200	1	1	1	0	0.05	0.425	0	0.15	0.6
377600	1	1	1	0	0.05	0.35	0	0.15	0.525
378000	1	1	1	0	0.05	0.35	0	0.1	0.425
378400	1	1	1	0	0.05	0.425	0	0.1	0.35
378800	1	1	1	0	0	0.425	0	0.05	0.325
379200	1	1	1	0	0	0.525	0	0.05	0.425
379600	1	1	1	0	0	0.6	0	0.05	0.425
380000	1	1	1	0	0	0.675	0	0.05	0.425
380400	1	1	1	0	0	0.675	0	0.05	0.425
380800	1	1	1	0	0	0.675	0	0.1	0.45
381200	1	1	1	0	0	0.675	0	0.15	0.55
381600	1	1	1	0	0	0.775	0	0.15	0.55
382000	1	1	1	0	0	0.8	0	0.25	0.65
382400	1	1	1	0	0	0.725	0	0.25	0.65
382800	1	1	1	0	0.1	0.725	0	0.25	0.575
383200	1	1	1	0	0.1	0.7	0	0.3	0.575
383600	1	1	1	0	0.1	0.625	0	0.3	0.65
384000	1	1	1	0	0.1	0.65	0	0.3	0.575
384400	1	1	1	0	0.1	0.55	0	0.25	0.475
384800	1	1	1	0	0.1	0.55	0	0.2	0.45
385200	1	1	1	0	0.1	0.575	0	0.15	0.35
385600	1	1	1	0	0.1	0.475	0	0.15	0.35
386000	1	1	1	0	0.1	0.45	0	0.05	0.325
386400	1	1	1	0	0.1	0.45	0	0.05	0.4
386800	1	1	1	0	0.05	0.45	0	0.05	0.4
387200	1	1	1	0	0.05	0.45	0	0	0.375
387600	1	1	1	0	0.15	0.55	0	0	0.3
388000	1	1	1	0	0.15	0.45	0	0	0.3
388400	1	1	1	0	0.15	0.45	0	0	0.4
388800	1	1	1	0	0.15	0.525	0	0	0.325
389200	1	1	1	0	0.15	0.425	0	0	0.325
389600	1	1	1	0	0.15	0.5	0	0	0.4
390000	1	1	1	0	0.15	0.425	0	0	0.425
390400	1	1	1	0	0.15	0.5	0	0	0.425
390800	1	1	1	0	0.1	0.4	0	0	0.425
391200	1	1	1	0	0.1	0.4	0	0	0.35
391600	1	1	1	0	0	0.3	0	0	0.45
392000	1	1	1	0	0	0.3	0	0	0.525
392400	1	1	1	0	0	0.4	0	0	0.425
392800	1	1	1	0	0.05	0.425	0	0	0.425
393200	1	1	1	0	0.05	0.425	0	0	0.525
393600	1	1	1	0	0.05	0.35	0	0	0.45
394000	1	1	1	0	0.05	0.425	0	0	0.425
394400	1	1	1	0	0.05	0.35	0	0	0.35
394800	1	1	1	0	0.05	0.45	0	0	0.425
395200	1	1	1	0	0.05	0.375	0	0	0.525
395600	1	1	1	0	0.05	0.45	0	0.05	0.525
396000	1	1	1	0	0.05	0.525	0	0.1	0.55
396400	1	1	1	0	0.05	0.425	0	0.1	0.55
396800	1	1	1	0	0	0.325	0	0.1	0.55
397200	1	1	1	0	0	0.4	0	0.1	0.525
397600	1	1	1	0	0	0.4	0	0.1	0.525
398000	1	1	1	0	0	0.4	0	0.1	0.45
398400	1	1	1	0	0	0.475	0	0.1	0.55
398800	1	1	1	0	0	0.475	0	0.1	0.55
399200	1	1	1	0	0	0.575	0	0.1	0.55
399600	1	1	1	0	0	0.5	0	0.05	0.525
400000	1	1	1	0	0	0.425	0	0	0.525
