# Supplementary material
Source: ML conference proceedings conference paper supplement (https://openreview.net/forum?id=Lb8ZnWW_In6)
Supplement: supplementary_material [file craft_t2.xlsx]

## Sheet: aqrm
0	0	0	0	0	0	0	0	0	0
0	0	0	0	0	0	0	0	0	0
0	0	0	0	0	0	0	0	0	0
0	0	0	0	0	0	0	0	0	0
0	0	0	0	0	0	0	0	0	0
0	0	0	0	0	0	0	0	0	0
0	0	0	0	0	0	0	0	0	0
0	0	0	0	0	0	0	0	0	0
0	0	0	0	0	0	0	0	0	0
0	0	0	0	0	0	0	0	0	0
0	0	0	0	0	0	0	0	0	0
0	0	0	0	0	0	0	0	0	0
0	1	0	0	0	0	0	0	0	0
0	0	0	0	0	0	0	0	0	0
0	0	0	0	0	0	0	0	0	0
0	1	0	0	0	0	0	0	0	0
0	0	0	0	0	0	0	0	0	0
0	0	0	0	0	0	0	0	0	0
0	0	0	0	0	0	0	0	0	0
0	0	0	0	0	0	0	0	0	0
0	0	0	0	0	0	0	1	0	0
0	0	0	0	0	0	0	0	0	0
0	0	0	0	0	0	0	0	0	0
0	0	0	0	0	0	0	0	0	0
0	1	1	0	0	0	0	0	0	0
0	0	1	0	0	0	0	0	0	0
0	0	0	0	0	0	0	0	0	1
0	0	0	0	0	0	0	0	0	0
0	0	0	0	0	0	0	0	0	0
0	0	0	0	0	0	0	0	0	0
0	0	0	0	0	0	0	0	0	0
0	0	0	0	0	0	0	0	0	0
0	0	0	0	0	0	0	0	0	0
0	0	0	0	0	0	0	0	0	0
0	0	0	0	0	0	0	0	0	0
0	0	0	0	0	0	0	0	0	0
0	0	0	0	0	0	0	0	0	0
0	0	0	0	0	1	0	0	0	0
0	0	0	0	0	0	0	0	0	0
0	0	0	0	0	0	0	0	0	0
0	0	0	0	0	0	0	0	0	0
0	0	0	0	0	0	1	0	0	0
0	0	0	0	0	0	0	0	0	0
0	0	0	0	0	0	0	0	0	0
0	0	0	0	0	0	0	0	0	0
0	0	0	0	0	0	0	0	0	0
0	0	0	0	0	0	0	0	0	0
0	0	0	0	0	0	0	0	0	0
0	0	0	0	0	0	0	0	0	0
0	0	0	0	0	0	0	0	0	0
0	0	0	0	0	0	0	0	0	0
0	0	0	0	0	0	0	0	0	0
0	0	0	0	0	0	0	0	0	0
0	0	0	0	0	0	0	1	0	0
0	1	0	0	0	0	0	0	1	0
0	1	0	0	1	0	0	0	0	0
0	0	0	0	0	0	0	0	0	0
0	0	0	0	0	0	0	0	0	1
1	0	0	0	1	0	0	0	0	0
0	0	0	0	0	1	0	0	0	0
0	0	0	0	0	0	0	0	0	0
0	0	0	0	0	0	0	0	0	0
0	1	0	0	0	0	0	1	0	0
0	0	0	0	0	0	0	1	0	0
0	0	1	0	0	0	0	0	0	0
0	0	1	0	0	0	0	1	0	0
0	1	0	1	0	0	0	1	0	0
0	0	0	0	1	0	0	0	0	0
1	0	0	1	1	0	0	0	0	0
1	1	1	0	1	0	0	1	0	0
0	0	0	0	1	0	0	1	0	1
0	0	0	0	1	0	0	1	0	0
1	1	1	0	1	0	0	1	0	0
0	0	1	0	0	0	0	1	0	1
1	0	1	0	0	0	0	1	0	1
0	0	0	0	0	0	0	1	0	0
0	1	1	0	0	0	0	0	0	0
0	0	1	0	0	0	0	0	0	1
0	0	1	0	1	0	0	1	0	1
1	1	0	0	0	0	1	0	0	1
0	1	1	0	1	0	0	1	0	0
0	1	1	0	1	0	0	1	0	0
1	1	1	0	1	0	0	1	0	0
1	1	1	0	1	0	0	1	0	0
0	1	1	0	1	0	0	1	0	0
1	1	1	0	1	0	0	1	0	0
1	1	1	0	1	0	1	1	0	0
0	1	1	0	1	0	0	1	0	1
0	1	1	0	1	0	0	1	0	0
1	1	1	0	1	0	0	1	0	0
1	1	1	0	1	0	1	1	0	0
1	1	1	0	1	0	1	1	1	1
1	1	1	0	1	0	0	1	1	1
1	1	1	0	1	0	1	1	0	0
1	1	1	0	1	0	1	1	1	1
1	1	1	0	1	0	1	1	1	1
1	1	1	0	1	0	1	1	1	1
1	1	1	0	1	0	0	1	0	1
1	1	1	0	1	0	1	1	1	1
1	1	1	0	1	0	0	1	0	1
1	1	1	1	1	1	1	1	0	1
1	1	1	0	1	0	1	1	0	1
1	1	1	0	1	0	1	1	0	1
1	1	1	0	1	0	1	1	1	1
1	1	1	0	1	0	1	1	0	1
1	1	1	0	1	0	1	1	1	1
1	1	1	1	1	0	1	1	1	1
1	1	1	0	1	0	1	1	0	1
1	1	1	0	1	0	1	1	0	1
1	1	1	1	1	0	1	1	0	1
1	1	1	1	1	1	1	1	0	1
1	1	1	0	1	0	1	1	1	1
1	1	1	1	1	1	1	1	1	1
1	1	1	1	1	0	1	1	1	1
1	1	1	0	1	1	1	1	1	1
1	1	1	1	1	0	1	1	1	1
1	1	1	1	1	1	1	1	1	1
1	1	1	1	1	1	1	1	1	1
1	1	1	1	1	0	1	1	1	1
1	1	1	0	1	1	1	1	1	1
1	1	1	1	1	1	1	1	1	1
1	1	1	0	1	0	1	1	1	1
1	1	1	0	1	1	1	1	1	1
1	1	1	1	1	1	1	1	1	1
1	1	1	1	1	1	1	1	1	1
1	1	1	1	1	1	1	1	1	1
1	1	1	1	1	1	1	1	1	1
1	1	1	1	1	0	1	1	1	1
1	1	1	1	1	1	1	1	1	1
1	1	1	1	1	1	1	1	1	1
1	1	1	1	1	1	1	1	1	1
1	1	1	1	1	1	1	1	1	1
1	1	1	1	1	1	1	1	1	1
1	1	1	1	1	1	1	1	1	1
1	1	1	1	1	1	1	1	1	1
1	1	1	1	1	1	1	1	1	1
1	1	1	1	1	1	1	1	1	1
1	1	1	1	1	1	1	1	1	1
1	1	1	1	1	1	1	1	1	1
1	1	1	1	1	1	1	1	1	1
1	1	1	1	1	1	1	1	1	1
1	1	1	1	1	1	1	1	1	1
1	1	1	1	1	1	1	1	1	1
1	1	1	1	1	1	1	1	1	1
1	1	1	1	1	1	1	1	1	1
1	1	1	1	1	1	1	1	1	1
1	1	1	1	1	1	1	1	1	1
1	1	1	1	1	1	1	1	1	1
1	1	1	1	1	1	1	1	1	1
1	1	1	1	1	1	1	1	1	1
1	1	1	1	1	1	1	1	1	1
1	1	1	1	1	1	1	1	1	1
1	1	1	1	1	1	1	1	1	1
1	1	1	1	1	1	1	1	1	1
1	1	1	1	1	1	1	1	1	1
1	1	1	1	1	1	1	1	1	1
1	1	1	1	1	1	1	1	1	1
1	1	1	1	1	1	1	1	1	1
1	1	1	1	1	1	1	1	1	1
1	1	1	1	1	1	1	1	1	1
1	1	1	1	1	1	1	1	1	1
1	1	1	1	1	1	1	1	1	1
1	1	1	1	1	1	1	1	1	1
1	1	1	1	1	1	1	1	1	1
1	1	1	1	1	1	1	1	1	1
1	1	1	1	1	1	1	1	1	1
1	1	1	1	1	1	1	1	1	1
1	1	1	1	1	1	1	1	1	1
1	1	1	1	1	1	1	1	1	1
1	1	1	1	1	1	1	1	1	1
1	1	1	1	1	1	1	1	1	1
1	1	1	1	1	1	1	1	1	1
1	1	1	1	1	1	1	1	1	1
1	1	1	1	1	1	1	1	1	1
1	1	1	1	1	1	1	1	1	1
1	1	1	1	1	1	1	1	1	1
1	1	1	1	1	1	1	1	1	1
1	1	1	1	1	1	1	1	1	1
1	1	1	1	1	1	1	1	1	1
1	1	1	1	1	1	1	1	1	1
1	1	1	1	1	1	1	1	1	1
1	1	1	1	1	1	1	1	1	1
1	1	1	1	1	1	1	1	1	1
1	1	1	1	1	1	1	1	1	1
1	1	1	1	1	1	1	1	1	1
1	1	1	1	1	1	1	1	1	1
1	1	1	1	1	1	1	1	1	1
1	1	1	1	1	1	1	1	1	1
1	1	1	1	1	1	1	1	1	1
1	1	1	1	1	1	1	1	1	1
1	1	1	1	1	1	1	1	1	1
1	1	1	1	1	1	1	1	1	1
1	1	1	1	1	1	1	1	1	1
1	1	1	1	1	1	1	1	1	1
1	1	1	1	1	1	1	1	1	1
1	1	1	1	1	1	1	1	1	1
1	1	1	1	1	1	1	1	1	1
1	1	1	1	1	1	1	1	1	1
1	1	1	1	1	1	1	1	1	1
1	1	1	1	1	1	1	1	1	1
1	1	1	1	1	1	1	1	1	1
1	1	1	1	1	1	1	1	1	1
1	1	1	1	1	1	1	1	1	1
1	1	1	1	1	1	1	1	1	1
1	1	1	1	1	1	1	1	1	1
1	1	1	1	1	1	1	1	1	1
1	1	1	1	1	1	1	1	1	1
1	1	1	1	1	1	1	1	1	1
1	1	1	1	1	1	1	1	1	1
1	1	1	1	1	1	1	1	1	1
1	1	1	1	1	1	1	1	1	1
1	1	1	1	1	1	1	1	1	1
1	1	1	1	1	1	1	1	1	1
1	1	1	1	1	1	1	1	1	1
1	1	1	1	1	1	1	1	1	1
1	1	1	1	1	1	1	1	1	1
1	1	1	1	1	1	1	1	1	1
1	1	1	1	1	1	1	1	1	1
1	1	1	1	1	1	1	1	1	1
1	1	1	1	1	1	1	1	1	1
1	1	1	1	1	1	1	1	1	1
1	1	1	1	1	1	1	1	1	1
1	1	1	1	1	1	1	1	1	1
1	1	1	1	1	1	1	1	1	1
1	1	1	1	1	1	1	1	1	1
1	1	1	1	1	1	1	1	1	1
1	1	1	1	1	1	1	1	1	1
1	1	1	1	1	1	1	1	1	1
1	1	1	1	1	1	1	1	1	1
1	1	1	1	1	1	1	1	1	1
1	1	1	1	1	1	1	1	1	1
1	1	1	1	1	1	1	1	1	1
1	1	1	1	1	1	1	1	1	1
1	1	1	1	1	1	1	1	1	1
1	1	1	1	1	1	1	1	1	1
1	1	1	1	1	1	1	1	1	1
1	1	1	1	1	1	1	1	1	1
1	1	1	1	1	1	1	1	1	1
1	1	1	1	1	1	1	1	1	1
1	1	1	1	1	1	1	1	1	1
1	1	1	1	1	1	1	1	1	1
1	1	1	1	1	1	1	1	1	1
1	1	1	1	1	1	1	1	1	1
1	1	1	1	1	1	1	1	1	1
1	1	1	1	1	1	1	1	1	1
1	1	1	1	1	1	1	1	1	1
1	1	1	1	1	1	1	1	1	1
1	1	1	1	1	1	1	1	1	1
1	1	1	1	1	1	1	1	1	1
1	1	1	1	1	1	1	1	1	1
1	1	1	1	1	1	1	1	1	1
1	1	1	1	1	1	1	1	1	1
1	1	1	1	1	1	1	1	1	1
1	1	1	1	1	1	1	1	1	1
1	1	1	1	1	1	1	1	1	1
1	1	1	1	1	1	1	1	1	1
1	1	1	1	1	1	1	1	1	1
1	1	1	1	1	1	1	1	1	1
1	1	1	1	1	1	1	1	1	1
1	1	1	1	1	1	1	1	1	1
1	1	1	1	1	1	1	1	1	1
1	1	1	1	1	1	1	1	1	1
1	1	1	1	1	1	1	1	1	1
1	1	1	1	1	1	1	1	1	1
1	1	1	1	1	1	1	1	1	1
1	1	1	1	1	1	1	1	1	1
1	1	1	1	1	1	1	1	1	1
1	1	1	1	1	1	1	1	1	1
1	1	1	1	1	1	1	1	1	1
1	1	1	1	1	1	1	1	1	1
1	1	1	1	1	1	1	1	1	1
1	1	1	1	1	1	1	1	1	1
1	1	1	1	1	1	1	1	1	1
1	1	1	1	1	1	1	1	1	1
1	1	1	1	1	1	1	1	1	1
1	1	1	1	1	1	1	1	1	1
1	1	1	1	1	1	1	1	1	1
1	1	1	1	1	1	1	1	1	1
1	1	1	1	1	1	1	1	1	1
1	1	1	1	1	1	1	1	1	1
1	1	1	1	1	1	1	1	1	1
1	1	1	1	1	1	1	1	1	1
1	1	1	1	1	1	1	1	1	1
1	1	1	1	1	1	1	1	1	1
1	1	1	1	1	1	1	1	1	1
1	1	1	1	1	1	1	1	1	1
1	1	1	1	1	1	1	1	1	1
1	1	1	1	1	1	1	1	1	1
1	1	1	1	1	1	1	1	1	1
1	1	1	1	1	1	1	1	1	1
1	1	1	1	1	1	1	1	1	1
1	1	1	1	1	1	1	1	1	1
1	1	1	1	1	1	1	1	1	1
1	1	1	1	1	1	1	1	1	1
1	1	1	1	1	1	1	1	1	1
1	1	1	1	1	1	1	1	1	1
1	1	1	1	1	1	1	1	1	1
1	1	1	1	1	1	1	1	1	1
1	1	1	1	1	1	1	1	1	1
1	1	1	1	1	1	1	1	1	1
1	1	1	1	1	1	1	1	1	1
1	1	1	1	1	1	1	1	1	1
1	1	1	1	1	1	1	1	1	1
1	1	1	1	1	1	1	1	1	1
1	1	1	1	1	1	1	1	1	1
1	1	1	1	1	1	1	1	1	1
1	1	1	1	1	1	1	1	1	1
1	1	1	1	1	1	1	1	1	1
1	1	1	1	1	1	1	1	1	1
1	1	1	1	1	1	1	1	1	1
1	1	1	1	1	1	1	1	1	1
1	1	1	1	1	1	1	1	1	1
1	1	1	1	1	1	1	1	1	1
1	1	1	1	1	1	1	1	1	1
1	1	1	1	1	1	1	1	1	1
1	1	1	1	1	1	1	1	1	1
1	1	1	1	1	1	1	1	1	1
1	1	1	1	1	1	1	1	1	1
1	1	1	1	1	1	1	1	1	1
1	1	1	1	1	1	1	1	1	1
1	1	1	1	1	1	1	1	1	1
1	1	1	1	1	1	1	1	1	1
1	1	1	1	1	1	1	1	1	1
1	1	1	1	1	1	1	1	1	1
1	1	1	1	1	1	1	1	1	1
1	1	1	1	1	1	1	1	1	1
1	1	1	1	1	1	1	1	1	1
1	1	1	1	1	1	1	1	1	1
1	1	1	1	1	1	1	1	1	1
1	1	1	1	1	1	1	1	1	1
1	1	1	1	1	1	1	1	1	1
1	1	1	1	1	1	1	1	1	1
1	1	1	1	1	1	1	1	1	1
1	1	1	1	1	1	1	1	1	1
1	1	1	1	1	1	1	1	1	1
1	1	1	1	1	1	1	1	1	1
1	1	1	1	1	1	1	1	1	1
1	1	1	1	1	1	1	1	1	1
1	1	1	1	1	1	1	1	1	1
1	1	1	1	1	1	1	1	1	1
1	1	1	1	1	1	1	1	1	1
1	1	1	1	1	1	1	1	1	1
1	1	1	1	1	1	1	1	1	1
1	1	1	1	1	1	1	1	1	1
1	1	1	1	1	1	1	1	1	1
1	1	1	1	1	1	1	1	1	1
1	1	1	1	1	1	1	1	1	1
1	1	1	1	1	1	1	1	1	1
1	1	1	1	1	1	1	1	1	1
1	1	1	1	1	1	1	1	1	1
1	1	1	1	1	1	1	1	1	1
1	1	1	1	1	1	1	1	1	1
1	1	1	1	1	1	1	1	1	1
1	1	1	1	1	1	1	1	1	1
1	1	1	1	1	1	1	1	1	1
1	1	1	1	1	1	1	1	1	1
1	1	1	1	1	1	1	1	1	1
1	1	1	1	1	1	1	1	1	1
1	1	1	1	1	1	1	1	1	1
1	1	1	1	1	1	1	1	1	1
1	1	1	1	1	1	1	1	1	1
1	1	1	1	1	1	1	1	1	1
1	1	1	1	1	1	1	1	1	1
1	1	1	1	1	1	1	1	1	1
1	1	1	1	1	1	1	1	1	1
1	1	1	1	1	1	1	1	1	1
1	1	1	1	1	1	1	1	1	1
1	1	1	1	1	1	1	1	1	1
1	1	1	1	1	1	1	1	1	1
1	1	1	1	1	1	1	1	1	1
1	1	1	1	1	1	1	1	1	1
1	1	1	1	1	1	1	1	1	1
1	1	1	1	1	1	1	1	1	1
1	1	1	1	1	1	1	1	1	1
1	1	1	1	1	1	1	1	1	1
1	1	1	1	1	1	1	1	1	1
1	1	1	1	1	1	1	1	1	1
1	1	1	1	1	1	1	1	1	1
1	1	1	1	1	1	1	1	1	1
1	1	1	1	1	1	1	1	1	1
1	1	1	1	1	1	1	1	1	1
1	1	1	1	1	1	1	1	1	1
1	1	1	1	1	1	1	1	1	1
1	1	1	1	1	1	1	1	1	1
1	1	1	1	1	1	1	1	1	1
1	1	1	1	1	1	1	1	1	1
1	1	1	1	1	1	1	1	1	1
1	1	1	1	1	1	1	1	1	1
1	1	1	1	1	1	1	1	1	1
1	1	1	1	1	1	1	1	1	1
1	1	1	1	1	1	1	1	1	1
1	1	1	1	1	1	1	1	1	1
1	1	1	1	1	1	1	1	1	1
1	1	1	1	1	1	1	1	1	1
1	1	1	1	1	1	1	1	1	1
1	1	1	1	1	1	1	1	1	1
1	1	1	1	1	1	1	1	1	1
1	1	1	1	1	1	1	1	1	1
1	1	1	1	1	1	1	1	1	1
1	1	1	1	1	1	1	1	1	1
1	1	1	1	1	1	1	1	1	1
1	1	1	1	1	1	1	1	1	1
1	1	1	1	1	1	1	1	1	1
1	1	1	1	1	1	1	1	1	1
1	1	1	1	1	1	1	1	1	1
1	1	1	1	1	1	1	1	1	1
1	1	1	1	1	1	1	1	1	1
1	1	1	1	1	1	1	1	1	1
1	1	1	1	1	1	1	1	1	1
1	1	1	1	1	1	1	1	1	1
1	1	1	1	1	1	1	1	1	1
1	1	1	1	1	1	1	1	1	1
1	1	1	1	1	1	1	1	1	1
1	1	1	1	1	1	1	1	1	1
1	1	1	1	1	1	1	1	1	1
1	1	1	1	1	1	1	1	1	1
1	1	1	1	1	1	1	1	1	1
1	1	1	1	1	1	1	1	1	1
1	1	1	1	1	1	1	1	1	1
1	1	1	1	1	1	1	1	1	1
1	1	1	1	1	1	1	1	1	1
1	1	1	1	1	1	1	1	1	1
1	1	1	1	1	1	1	1	1	1
1	1	1	1	1	1	1	1	1	1
1	1	1	1	1	1	1	1	1	1
1	1	1	1	1	1	1	1	1	1
1	1	1	1	1	1	1	1	1	1
1	1	1	1	1	1	1	1	1	1
1	1	1	1	1	1	1	1	1	1
1	1	1	1	1	1	1	1	1	1
1	1	1	1	1	1	1	1	1	1
1	1	1	1	1	1	1	1	1	1
1	1	1	1	1	1	1	1	1	1
1	1	1	1	1	1	1	1	1	1
1	1	1	1	1	1	1	1	1	1
1	1	1	1	1	1	1	1	1	1
1	1	1	1	1	1	1	1	1	1
1	1	1	1	1	1	1	1	1	1
1	1	1	1	1	1	1	1	1	1
1	1	1	1	1	1	1	1	1	1
1	1	1	1	1	1	1	1	1	1
1	1	1	1	1	1	1	1	1	1
1	1	1	1	1	1	1	1	1	1
1	1	1	1	1	1	1	1	1	1
1	1	1	1	1	1	1	1	1	1
1	1	1	1	1	1	1	1	1	1
1	1	1	1	1	1	1	1	1	1
1	1	1	1	1	1	1	1	1	1
1	1	1	1	1	1	1	1	1	1
1	1	1	1	1	1	1	1	1	1
1	1	1	1	1	1	1	1	1	1
1	1	1	1	1	1	1	1	1	1
1	1	1	1	1	1	1	1	1	1
1	1	1	1	1	1	1	1	1	1
1	1	1	1	1	1	1	1	1	1
1	1	1	1	1	1	1	1	1	1
1	1	1	1	1	1	1	1	1	1
1	1	1	1	1	1	1	1	1	1
1	1	1	1	1	1	1	1	1	1
1	1	1	1	1	1	1	1	1	1
1	1	1	1	1	1	1	1	1	1
1	1	1	1	1	1	1	1	1	1
1	1	1	1	1	1	1	1	1	1
1	1	1	1	1	1	1	1	1	1
1	1	1	1	1	1	1	1	1	1
1	1	1	1	1	1	1	1	1	1
1	1	1	1	1	1	1	1	1	1
1	1	1	1	1	1	1	1	1	1
1	1	1	1	1	1	1	1	1	1
1	1	1	1	1	1	1	1	1	1
1	1	1	1	1	1	1	1	1	1
1	1	1	1	1	1	1	1	1	1
1	1	1	1	1	1	1	1	1	1
1	1	1	1	1	1	1	1	1	1
1	1	1	1	1	1	1	1	1	1
1	1	1	1	1	1	1	1	1	1
1	1	1	1	1	1	1	1	1	1
1	1	1	1	1	1	1	1	1	1
1	1	1	1	1	1	1	1	1	1
1	1	1	1	1	1	1	1	1	1
1	1	1	1	1	1	1	1	1	1
1	1	1	1	1	1	1	1	1	1
1	1	1	1	1	1	1	1	1	1
1	1	1	1	1	1	1	1	1	1
1	1	1	1	1	1	1	1	1	1
1	1	1	1	1	1	1	1	1	1
1	1	1	1	1	1	1	1	1	1
1	1	1	1	1	1	1	1	1	1
1	1	1	1	1	1	1	1	1	1
1	1	1	1	1	1	1	1	1	1
1	1	1	1	1	1	1	1	1	1
1	1	1	1	1	1	1	1	1	1
1	1	1	1	1	1	1	1	1	1
1	1	1	1	1	1	1	1	1	1
1	1	1	1	1	1	1	1	1	1
1	1	1	1	1	1	1	1	1	1
1	1	1	1	1	1	1	1	1	1
1	1	1	1	1	1	1	1	1	1
1	1	1	1	1	1	1	1	1	1
1	1	1	1	1	1	1	1	1	1
1	1	1	1	1	1	1	1	1	1
1	1	1	1	1	1	1	1	1	1
1	1	1	1	1	1	1	1	1	1
1	1	1	1	1	1	1	1	1	1
1	1	1	1	1	1	1	1	1	1
1	1	1	1	1	1	1	1	1	1
1	1	1	1	1	1	1	1	1	1
1	1	1	1	1	1	1	1	1	1
1	1	1	1	1	1	1	1	1	1
1	1	1	1	1	1	1	1	1	1
1	1	1	1	1	1	1	1	1	1
1	1	1	1	1	1	1	1	1	1
1	1	1	1	1	1	1	1	1	1
1	1	1	1	1	1	1	1	1	1
1	1	1	1	1	1	1	1	1	1
1	1	1	1	1	1	1	1	1	1
1	1	1	1	1	1	1	1	1	1
1	1	1	1	1	1	1	1	1	1
1	1	1	1	1	1	1	1	1	1
1	1	1	1	1	1	1	1	1	1
1	1	1	1	1	1	1	1	1	1
1	1	1	1	1	1	1	1	1	1
1	1	1	1	1	1	1	1	1	1
1	1	1	1	1	1	1	1	1	1
1	1	1	1	1	1	1	1	1	1
1	1	1	1	1	1	1	1	1	1
1	1	1	1	1	1	1	1	1	1
1	1	1	1	1	1	1	1	1	1
1	1	1	1	1	1	1	1	1	1
1	1	1	1	1	1	1	1	1	1
1	1	1	1	1	1	1	1	1	1
1	1	1	1	1	1	1	1	1	1
1	1	1	1	1	1	1	1	1	1
1	1	1	1	1	1	1	1	1	1
1	1	1	1	1	1	1	1	1	1
1	1	1	1	1	1	1	1	1	1
1	1	1	1	1	1	1	1	1	1
1	1	1	1	1	1	1	1	1	1
1	1	1	1	1	1	1	1	1	1
1	1	1	1	1	1	1	1	1	1
1	1	1	1	1	1	1	1	1	1
1	1	1	1	1	1	1	1	1	1
1	1	1	1	1	1	1	1	1	1
1	1	1	1	1	1	1	1	1	1
1	1	1	1	1	1	1	1	1	1
1	1	1	1	1	1	1	1	1	1
1	1	1	1	1	1	1	1	1	1
1	1	1	1	1	1	1	1	1	1
1	1	1	1	1	1	1	1	1	1
1	1	1	1	1	1	1	1	1	1
1	1	1	1	1	1	1	1	1	1
1	1	1	1	1	1	1	1	1	1
1	1	1	1	1	1	1	1	1	1
1	1	1	1	1	1	1	1	1	1
1	1	1	1	1	1	1	1	1	1
1	1	1	1	1	1	1	1	1	1
1	1	1	1	1	1	1	1	1	1
1	1	1	1	1	1	1	1	1	1
1	1	1	1	1	1	1	1	1	1
1	1	1	1	1	1	1	1	1	1
1	1	1	1	1	1	1	1	1	1
1	1	1	1	1	1	1	1	1	1
1	1	1	1	1	1	1	1	1	1
1	1	1	1	1	1	1	1	1	1
1	1	1	1	1	1	1	1	1	1
1	1	1	1	1	1	1	1	1	1
1	1	1	1	1	1	1	1	1	1
1	1	1	1	1	1	1	1	1	1
1	1	1	1	1	1	1	1	1	1
1	1	1	1	1	1	1	1	1	1
1	1	1	1	1	1	1	1	1	1
1	1	1	1	1	1	1	1	1	1
1	1	1	1	1	1	1	1	1	1
1	1	1	1	1	1	1	1	1	1
1	1	1	1	1	1	1	1	1	1
1	1	1	1	1	1	1	1	1	1
1	1	1	1	1	1	1	1	1	1
1	1	1	1	1	1	1	1	1	1
1	1	1	1	1	1	1	1	1	1
1	1	1	1	1	1	1	1	1	1
1	1	1	1	1	1	1	1	1	1
1	1	1	1	1	1	1	1	1	1
1	1	1	1	1	1	1	1	1	1
1	1	1	1	1	1	1	1	1	1
1	1	1	1	1	1	1	1	1	1
1	1	1	1	1	1	1	1	1	1
1	1	1	1	1	1	1	1	1	1
1	1	1	1	1	1	1	1	1	1
1	1	1	1	1	1	1	1	1	1
1	1	1	1	1	1	1	1	1	1
1	1	1	1	1	1	1	1	1	1
1	1	1	1	1	1	1	1	1	1
1	1	1	1	1	1	1	1	1	1
1	1	1	1	1	1	1	1	1	1
1	1	1	1	1	1	1	1	1	1
1	1	1	1	1	1	1	1	1	1
1	1	1	1	1	1	1	1	1	1
1	1	1	1	1	1	1	1	1	1
1	1	1	1	1	1	1	1	1	1
1	1	1	1	1	1	1	1	1	1
1	1	1	1	1	1	1	1	1	1
1	1	1	1	1	1	1	1	1	1
1	1	1	1	1	1	1	1	1	1
1	1	1	1	1	1	1	1	1	1
1	1	1	1	1	1	1	1	1	1
1	1	1	1	1	1	1	1	1	1
1	1	1	1	1	1	1	1	1	1
1	1	1	1	1	1	1	1	1	1
1	1	1	1	1	1	1	1	1	1
1	1	1	1	1	1	1	1	1	1
1	1	1	1	1	1	1	1	1	1
1	1	1	1	1	1	1	1	1	1
1	1	1	1	1	1	1	1	1	1
1	1	1	1	1	1	1	1	1	1
1	1	1	1	1	1	1	1	1	1
1	1	1	1	1	1	1	1	1	1
1	1	1	1	1	1	1	1	1	1
1	1	1	1	1	1	1	1	1	1
1	1	1	1	1	1	1	1	1	1
1	1	1	1	1	1	1	1	1	1
1	1	1	1	1	1	1	1	1	1
1	1	1	1	1	1	1	1	1	1
1	1	1	1	1	1	1	1	1	1
1	1	1	1	1	1	1	1	1	1
1	1	1	1	1	1	1	1	1	1
1	1	1	1	1	1	1	1	1	1
1	1	1	1	1	1	1	1	1	1
1	1	1	1	1	1	1	1	1	1
1	1	1	1	1	1	1	1	1	1
1	1	1	1	1	1	1	1	1	1
1	1	1	1	1	1	1	1	1	1
1	1	1	1	1	1	1	1	1	1
1	1	1	1	1	1	1	1	1	1
1	1	1	1	1	1	1	1	1	1
1	1	1	1	1	1	1	1	1	1
1	1	1	1	1	1	1	1	1	1
1	1	1	1	1	1	1	1	1	1
1	1	1	1	1	1	1	1	1	1
1	1	1	1	1	1	1	1	1	1
1	1	1	1	1	1	1	1	1	1
1	1	1	1	1	1	1	1	1	1
1	1	1	1	1	1	1	1	1	1
1	1	1	1	1	1	1	1	1	1
1	1	1	1	1	1	1	1	1	1
1	1	1	1	1	1	1	1	1	1
1	1	1	1	1	1	1	1	1	1
1	1	1	1	1	1	1	1	1	1
1	1	1	1	1	1	1	1	1	1
1	1	1	1	1	1	1	1	1	1
1	1	1	1	1	1	1	1	1	1
1	1	1	1	1	1	1	1	1	1
1	1	1	1	1	1	1	1	1	1
1	1	1	1	1	1	1	1	1	1
1	1	1	1	1	1	1	1	1	1
1	1	1	1	1	1	1	1	1	1
1	1	1	1	1	1	1	1	1	1
1	1	1	1	1	1	1	1	1	1
1	1	1	1	1	1	1	1	1	1
1	1	1	1	1	1	1	1	1	1
1	1	1	1	1	1	1	1	1	1
1	1	1	1	1	1	1	1	1	1
1	1	1	1	1	1	1	1	1	1
1	1	1	1	1	1	1	1	1	1
1	1	1	1	1	1	1	1	1	1
1	1	1	1	1	1	1	1	1	1
1	1	1	1	1	1	1	1	1	1
1	1	1	1	1	1	1	1	1	1
1	1	1	1	1	1	1	1	1	1
1	1	1	1	1	1	1	1	1	1
1	1	1	1	1	1	1	1	1	1
1	1	1	1	1	1	1	1	1	1
1	1	1	1	1	1	1	1	1	1
1	1	1	1	1	1	1	1	1	1
1	1	1	1	1	1	1	1	1	1
1	1	1	1	1	1	1	1	1	1
1	1	1	1	1	1	1	1	1	1
1	1	1	1	1	1	1	1	1	1
1	1	1	1	1	1	1	1	1	1
1	1	1	1	1	1	1	1	1	1
1	1	1	1	1	1	1	1	1	1
1	1	1	1	1	1	1	1	1	1
1	1	1	1	1	1	1	1	1	1
1	1	1	1	1	1	1	1	1	1
1	1	1	1	1	1	1	1	1	1
1	1	1	1	1	1	1	1	1	1
1	1	1	1	1	1	1	1	1	1
1	1	1	1	1	1	1	1	1	1
1	1	1	1	1	1	1	1	1	1
1	1	1	1	1	1	1	1	1	1
1	1	1	1	1	1	1	1	1	1
1	1	1	1	1	1	1	1	1	1
1	1	1	1	1	1	1	1	1	1
1	1	1	1	1	1	1	1	1	1
1	1	1	1	1	1	1	1	1	1
1	1	1	1	1	1	1	1	1	1
1	1	1	1	1	1	1	1	1	1
1	1	1	1	1	1	1	1	1	1
1	1	1	1	1	1	1	1	1	1
1	1	1	1	1	1	1	1	1	1
1	1	1	1	1	1	1	1	1	1
1	1	1	1	1	1	1	1	1	1
1	1	1	1	1	1	1	1	1	1
1	1	1	1	1	1	1	1	1	1
1	1	1	1	1	1	1	1	1	1
1	1	1	1	1	1	1	1	1	1
1	1	1	1	1	1	1	1	1	1
1	1	1	1	1	1	1	1	1	1
1	1	1	1	1	1	1	1	1	1
1	1	1	1	1	1	1	1	1	1
1	1	1	1	1	1	1	1	1	1
1	1	1	1	1	1	1	1	1	1
1	1	1	1	1	1	1	1	1	1
1	1	1	1	1	1	1	1	1	1
1	1	1	1	1	1	1	1	1	1
1	1	1	1	1	1	1	1	1	1
1	1	1	1	1	1	1	1	1	1
1	1	1	1	1	1	1	1	1	1
1	1	1	1	1	1	1	1	1	1
1	1	1	1	1	1	1	1	1	1
1	1	1	1	1	1	1	1	1	1
1	1	1	1	1	1	1	1	1	1
1	1	1	1	1	1	1	1	1	1
1	1	1	1	1	1	1	1	1	1
1	1	1	1	1	1	1	1	1	1
1	1	1	1	1	1	1	1	1	1
1	1	1	1	1	1	1	1	1	1
1	1	1	1	1	1	1	1	1	1
1	1	1	1	1	1	1	1	1	1
1	1	1	1	1	1	1	1	1	1
1	1	1	1	1	1	1	1	1	1
1	1	1	1	1	1	1	1	1	1
1	1	1	1	1	1	1	1	1	1
1	1	1	1	1	1	1	1	1	1
1	1	1	1	1	1	1	1	1	1
1	1	1	1	1	1	1	1	1	1
1	1	1	1	1	1	1	1	1	1
1	1	1	1	1	1	1	1	1	1
1	1	1	1	1	1	1	1	1	1
1	1	1	1	1	1	1	1	1	1
1	1	1	1	1	1	1	1	1	1
1	1	1	1	1	1	1	1	1	1
1	1	1	1	1	1	1	1	1	1
1	1	1	1	1	1	1	1	1	1
1	1	1	1	1	1	1	1	1	1
1	1	1	1	1	1	1	1	1	1
1	1	1	1	1	1	1	1	1	1
1	1	1	1	1	1	1	1	1	1
1	1	1	1	1	1	1	1	1	1
1	1	1	1	1	1	1	1	1	1
1	1	1	1	1	1	1	1	1	1
1	1	1	1	1	1	1	1	1	1
1	1	1	1	1	1	1	1	1	1
1	1	1	1	1	1	1	1	1	1
1	1	1	1	1	1	1	1	1	1
1	1	1	1	1	1	1	1	1	1
1	1	1	1	1	1	1	1	1	1
1	1	1	1	1	1	1	1	1	1
1	1	1	1	1	1	1	1	1	1
1	1	1	1	1	1	1	1	1	1
1	1	1	1	1	1	1	1	1	1
1	1	1	1	1	1	1	1	1	1
1	1	1	1	1	1	1	1	1	1
1	1	1	1	1	1	1	1	1	1
1	1	1	1	1	1	1	1	1	1
1	1	1	1	1	1	1	1	1	1
1	1	1	1	1	1	1	1	1	1
1	1	1	1	1	1	1	1	1	1
1	1	1	1	1	1	1	1	1	1
1	1	1	1	1	1	1	1	1	1
1	1	1	1	1	1	1	1	1	1
1	1	1	1	1	1	1	1	1	1
1	1	1	1	1	1	1	1	1	1
1	1	1	1	1	1	1	1	1	1
1	1	1	1	1	1	1	1	1	1
1	1	1	1	1	1	1	1	1	1
1	1	1	1	1	1	1	1	1	1
1	1	1	1	1	1	1	1	1	1
1	1	1	1	1	1	1	1	1	1
1	1	1	1	1	1	1	1	1	1
1	1	1	1	1	1	1	1	1	1
1	1	1	1	1	1	1	1	1	1
1	1	1	1	1	1	1	1	1	1
1	1	1	1	1	1	1	1	1	1
1	1	1	1	1	1	1	1	1	1
1	1	1	1	1	1	1	1	1	1
1	1	1	1	1	1	1	1	1	1
1	1	1	1	1	1	1	1	1	1
1	1	1	1	1	1	1	1	1	1
1	1	1	1	1	1	1	1	1	1
1	1	1	1	1	1	1	1	1	1
1	1	1	1	1	1	1	1	1	1
1	1	1	1	1	1	1	1	1	1
1	1	1	1	1	1	1	1	1	1
1	1	1	1	1	1	1	1	1	1
1	1	1	1	1	1	1	1	1	1
1	1	1	1	1	1	1	1	1	1
1	1	1	1	1	1	1	1	1	1
1	1	1	1	1	1	1	1	1	1
1	1	1	1	1	1	1	1	1	1
1	1	1	1	1	1	1	1	1	1
1	1	1	1	1	1	1	1	1	1
1	1	1	1	1	1	1	1	1	1
1	1	1	1	1	1	1	1	1	1
1	1	1	1	1	1	1	1	1	1
1	1	1	1	1	1	1	1	1	1
1	1	1	1	1	1	1	1	1	1
1	1	1	1	1	1	1	1	1	1
1	1	1	1	1	1	1	1	1	1
1	1	1	1	1	1	1	1	1	1
1	1	1	1	1	1	1	1	1	1
1	1	1	1	1	1	1	1	1	1
1	1	1	1	1	1	1	1	1	1
1	1	1	1	1	1	1	1	1	1
1	1	1	1	1	1	1	1	1	1
1	1	1	1	1	1	1	1	1	1
1	1	1	1	1	1	1	1	1	1
1	1	1	1	1	1	1	1	1	1
1	1	1	1	1	1	1	1	1	1
1	1	1	1	1	1	1	1	1	1
1	1	1	1	1	1	1	1	1	1
1	1	1	1	1	1	1	1	1	1
1	1	1	1	1	1	1	1	1	1
1	1	1	1	1	1	1	1	1	1
1	1	1	1	1	1	1	1	1	1
1	1	1	1	1	1	1	1	1	1
1	1	1	1	1	1	1	1	1	1
1	1	1	1	1	1	1	1	1	1
1	1	1	1	1	1	1	1	1	1
1	1	1	1	1	1	1	1	1	1
1	1	1	1	1	1	1	1	1	1
1	1	1	1	1	1	1	1	1	1
1	1	1	1	1	1	1	1	1	1
1	1	1	1	1	1	1	1	1	1
1	1	1	1	1	1	1	1	1	1
1	1	1	1	1	1	1	1	1	1
1	1	1	1	1	1	1	1	1	1
1	1	1	1	1	1	1	1	1	1
1	1	1	1	1	1	1	1	1	1
1	1	1	1	1	1	1	1	1	1
1	1	1	1	1	1	1	1	1	1
1	1	1	1	1	1	1	1	1	1
1	1	1	1	1	1	1	1	1	1
1	1	1	1	1	1	1	1	1	1
1	1	1	1	1	1	1	1	1	1
1	1	1	1	1	1	1	1	1	1
1	1	1	1	1	1	1	1	1	1
1	1	1	1	1	1	1	1	1	1
1	1	1	1	1	1	1	1	1	1
1	1	1	1	1	1	1	1	1	1
1	1	1	1	1	1	1	1	1	1
1	1	1	1	1	1	1	1	1	1
1	1	1	1	1	1	1	1	1	1
1	1	1	1	1	1	1	1	1	1
1	1	1	1	1	1	1	1	1	1
1	1	1	1	1	1	1	1	1	1
1	1	1	1	1	1	1	1	1	1
1	1	1	1	1	1	1	1	1	1
1	1	1	1	1	1	1	1	1	1
1	1	1	1	1	1	1	1	1	1
1	1	1	1	1	1	1	1	1	1
1	1	1	1	1	1	1	1	1	1
1	1	1	1	1	1	1	1	1	1
1	1	1	1	1	1	1	1	1	1
1	1	1	1	1	1	1	1	1	1
1	1	1	1	1	1	1	1	1	1
1	1	1	1	1	1	1	1	1	1
1	1	1	1	1	1	1	1	1	1
1	1	1	1	1	1	1	1	1	1
1	1	1	1	1	1	1	1	1	1
1	1	1	1	1	1	1	1	1	1
1	1	1	1	1	1	1	1	1	1
1	1	1	1	1	1	1	1	1	1
1	1	1	1	1	1	1	1	1	1
1	1	1	1	1	1	1	1	1	1
1	1	1	1	1	1	1	1	1	1
1	1	1	1	1	1	1	1	1	1
1	1	1	1	1	1	1	1	1	1
1	1	1	1	1	1	1	1	1	1
1	1	1	1	1	1	1	1	1	1
1	1	1	1	1	1	1	1	1	1
1	1	1	1	1	1	1	1	1	1
1	1	1	1	1	1	1	1	1	1
1	1	1	1	1	1	1	1	1	1
1	1	1	1	1	1	1	1	1	1
1	1	1	1	1	1	1	1	1	1
1	1	1	1	1	1	1	1	1	1
1	1	1	1	1	1	1	1	1	1
1	1	1	1	1	1	1	1	1	1
1	1	1	1	1	1	1	1	1	1
1	1	1	1	1	1	1	1	1	1
1	1	1	1	1	1	1	1	1	1
1	1	1	1	1	1	1	1	1	1
1	1	1	1	1	1	1	1	1	1
1	1	1	1	1	1	1	1	1	1
1	1	1	1	1	1	1	1	1	1
1	1	1	1	1	1	1	1	1	1
1	1	1	1	1	1	1	1	1	1
1	1	1	1	1	1	1	1	1	1
1	1	1	1	1	1	1	1	1	1
1	1	1	1	1	1	1	1	1	1
1	1	1	1	1	1	1	1	1	1
1	1	1	1	1	1	1	1	1	1
1	1	1	1	1	1	1	1	1	1
1	1	1	1	1	1	1	1	1	1
1	1	1	1	1	1	1	1	1	1
1	1	1	1	1	1	1	1	1	1
1	1	1	1	1	1	1	1	1	1
1	1	1	1	1	1	1	1	1	1
1	1	1	1	1	1	1	1	1	1
1	1	1	1	1	1	1	1	1	1
1	1	1	1	1	1	1	1	1	1
1	1	1	1	1	1	1	1	1	1
1	1	1	1	1	1	1	1	1	1
1	1	1	1	1	1	1	1	1	1
1	1	1	1	1	1	1	1	1	1
1	1	1	1	1	1	1	1	1	1
1	1	1	1	1	1	1	1	1	1
1	1	1	1	1	1	1	1	1	1
1	1	1	1	1	1	1	1	1	1
1	1	1	1	1	1	1	1	1	1
1	1	1	1	1	1	1	1	1	1
1	1	1	1	1	1	1	1	1	1
1	1	1	1	1	1	1	1	1	1
1	1	1	1	1	1	1	1	1	1
1	1	1	1	1	1	1	1	1	1
1	1	1	1	1	1	1	1	1	1
1	1	1	1	1	1	1	1	1	1
1	1	1	1	1	1	1	1	1	1
1	1	1	1	1	1	1	1	1	1
1	1	1	1	1	1	1	1	1	1
1	1	1	1	1	1	1	1	1	1
1	1	1	1	1	1	1	1	1	1
1	1	1	1	1	1	1	1	1	1
1	1	1	1	1	1	1	1	1	1
1	1	1	1	1	1	1	1	1	1
1	1	1	1	1	1	1	1	1	1
1	1	1	1	1	1	1	1	1	1
1	1	1	1	1	1	1	1	1	1
1	1	1	1	1	1	1	1	1	1
1	1	1	1	1	1	1	1	1	1
1	1	1	1	1	1	1	1	1	1
1	1	1	1	1	1	1	1	1	1
1	1	1	1	1	1	1	1	1	1
1	1	1	1	1	1	1	1	1	1
1	1	1	1	1	1	1	1	1	1
1	1	1	1	1	1	1	1	1	1
1	1	1	1	1	1	1	1	1	1
1	1	1	1	1	1	1	1	1	1
1	1	1	1	1	1	1	1	1	1
1	1	1	1	1	1	1	1	1	1
1	1	1	1	1	1	1	1	1	1
1	1	1	1	1	1	1	1	1	1
1	1	1	1	1	1	1	1	1	1
1	1	1	1	1	1	1	1	1	1
1	1	1	1	1	1	1	1	1	1
1	1	1	1	1	1	1	1	1	1
1	1	1	1	1	1	1	1	1	1
1	1	1	1	1	1	1	1	1	1
1	1	1	1	1	1	1	1	1	1
1	1	1	1	1	1	1	1	1	1
1	1	1	1	1	1	1	1	1	1
1	1	1	1	1	1	1	1	1	1
1	1	1	1	1	1	1	1	1	1
1	1	1	1	1	1	1	1	1	1
1	1	1	1	1	1	1	1	1	1
1	1	1	1	1	1	1	1	1	1
1	1	1	1	1	1	1	1	1	1
1	1	1	1	1	1	1	1	1	1
1	1	1	1	1	1	1	1	1	1
1	1	1	1	1	1	1	1	1	1
1	1	1	1	1	1	1	1	1	1
1	1	1	1	1	1	1	1	1	1
1	1	1	1	1	1	1	1	1	1
1	1	1	1	1	1	1	1	1	1
1	1	1	1	1	1	1	1	1	1
1	1	1	1	1	1	1	1	1	1
1	1	1	1	1	1	1	1	1	1
1	1	1	1	1	1	1	1	1	1
1	1	1	1	1	1	1	1	1	1
1	1	1	1	1	1	1	1	1	1
1	1	1	1	1	1	1	1	1	1
1	1	1	1	1	1	1	1	1	1
1	1	1	1	1	1	1	1	1	1
1	1	1	1	1	1	1	1	1	1
1	1	1	1	1	1	1	1	1	1
1	1	1	1	1	1	1	1	1	1
1	1	1	1	1	1	1	1	1	1
1	1	1	1	1	1	1	1	1	1
1	1	1	1	1	1	1	1	1	1
1	1	1	1	1	1	1	1	1	1
1	1	1	1	1	1	1	1	1	1
1	1	1	1	1	1	1	1	1	1
1	1	1	1	1	1	1	1	1	1
1	1	1	1	1	1	1	1	1	1
1	1	1	1	1	1	1	1	1	1
1	1	1	1	1	1	1	1	1	1
1	1	1	1	1	1	1	1	1	1
1	1	1	1	1	1	1	1	1	1
1	1	1	1	1	1	1	1	1	1
1	1	1	1	1	1	1	1	1	1

## Sheet: hrl
0	0	0	0	0	0	0	0	0	0
0	0	0	0	0	0	0	0	0	0
0	0	0	0	0	0	0	0	0	0
0	0	0	0	0	0	0	0	0	0
0	0	0	0	0	0	0	0	0	0
0	0	0	0	0	0	0	0	0	0
0	0	0	0	0	0	0	0	0	0
0	0	0	0	0	0	0	0	0	0
0	0	0	0	0	0	0	0	0	0
0	0	0	0	0	0	0	0	0	0
1	0	0	0	0	0	0	0	0	0
0	0	0	0	0	0	0	0	1	0
0	0	0	0	0	0	0	0	0	0
1	0	0	0	0	0	0	0	0	0
0	0	0	0	0	0	0	0	0	0
0	0	0	1	0	0	0	0	0	0
0	0	0	0	0	0	0	0	0	0
0	1	0	0	0	0	0	0	0	0
0	0	0	0	0	0	0	0	0	0
0	0	0	0	0	0	0	0	0	0
0	0	0	0	0	0	0	0	0	1
0	0	0	0	0	0	0	0	0	0
0	0	0	0	1	1	1	0	0	1
0	0	0	0	0	0	1	0	0	0
0	0	1	0	1	0	1	0	1	0
1	1	1	1	0	0	0	0	0	0
0	0	1	0	1	0	1	0	1	0
0	0	0	0	0	0	0	1	0	0
1	0	1	0	0	0	0	0	0	0
0	0	0	1	0	0	0	0	0	0
0	0	0	1	0	0	0	0	1	0
0	1	0	0	0	0	0	0	1	0
1	1	0	0	1	1	0	0	1	1
0	0	1	0	1	1	0	1	0	1
0	1	0	0	0	0	0	1	0	0
0	0	0	1	1	1	0	1	0	1
1	0	0	1	1	0	0	0	0	1
0	1	1	0	0	0	0	1	0	1
1	0	0	0	1	1	0	1	1	1
0	0	0	0	0	0	0	0	1	1
0	0	1	1	0	0	0	1	0	1
0	1	0	0	0	1	1	0	1	1
0	0	1	1	1	0	0	0	0	0
0	1	1	0	0	1	0	0	0	0
0	1	1	1	0	1	0	0	0	0
0	0	0	0	0	0	1	0	0	0
0	0	0	1	0	1	1	0	0	1
1	0	0	1	0	1	0	0	1	0
0	0	0	0	1	1	0	0	0	1
1	1	0	0	1	1	1	0	0	0
1	0	1	0	1	0	1	0	0	1
0	1	0	0	0	1	0	1	0	1
0	0	1	0	0	1	1	0	1	1
0	0	0	0	1	0	1	1	0	1
0	1	0	0	1	1	0	1	1	1
1	1	1	0	1	0	1	1	0	1
0	1	0	0	1	1	1	1	1	1
1	0	1	0	0	0	1	1	1	0
0	0	0	1	0	0	1	1	0	0
1	1	0	0	1	1	1	1	0	0
0	0	0	1	0	1	1	0	0	0
0	1	0	1	0	0	0	1	1	1
1	0	0	0	0	1	1	1	0	1
0	0	1	0	0	0	1	1	1	0
1	1	0	0	0	0	0	1	0	1
1	1	0	1	0	1	0	0	1	1
0	1	1	1	0	1	1	0	0	1
1	1	1	1	0	1	1	1	1	1
0	1	1	1	1	1	0	1	1	1
1	0	0	0	0	1	0	1	1	0
1	1	0	1	0	1	0	0	1	1
1	1	1	1	0	0	1	0	0	1
1	1	0	1	0	1	0	1	1	1
1	1	0	1	1	1	1	0	1	1
1	1	0	1	1	1	1	1	1	1
1	0	0	1	0	1	0	1	0	1
0	0	1	0	0	1	1	0	0	1
1	0	1	1	0	1	0	1	0	1
0	0	1	1	0	1	1	1	1	1
0	0	0	1	0	1	1	1	1	1
0	1	0	0	1	1	0	0	0	1
0	1	0	0	1	1	0	1	1	0
0	0	0	1	1	1	1	1	1	1
1	1	1	1	1	1	1	1	1	1
0	1	0	1	1	1	0	0	0	1
0	1	0	0	1	1	1	1	0	1
0	1	0	1	1	0	1	1	0	1
1	1	1	0	1	0	1	1	1	1
1	0	0	1	1	1	1	1	0	1
0	0	0	0	0	0	1	1	0	1
0	0	0	0	0	0	1	1	1	1
1	1	0	0	0	0	0	1	1	1
1	0	1	1	0	1	0	1	0	1
0	0	1	0	1	0	1	1	1	0
1	0	1	1	1	1	0	1	1	0
1	0	0	0	1	1	1	1	0	1
1	1	0	1	1	1	1	1	1	1
1	1	1	1	1	1	1	1	1	1
1	0	1	1	1	1	1	1	1	1
1	1	1	1	1	0	1	1	1	0
0	0	1	1	1	0	1	1	1	1
1	1	1	0	0	0	0	0	1	1
1	1	1	1	1	1	0	0	1	0
1	1	1	0	1	1	1	1	1	0
1	0	1	0	0	1	1	1	1	1
0	1	0	1	1	1	1	1	1	0
1	0	1	1	1	1	0	1	1	1
1	1	1	1	0	1	1	1	1	1
1	1	1	1	1	0	1	1	0	0
0	1	1	1	1	1	1	1	1	1
1	0	1	0	1	1	1	1	1	1
0	0	0	1	1	0	0	1	1	1
1	0	0	0	1	0	0	0	0	1
1	0	1	0	1	1	1	1	1	1
1	1	0	1	0	1	1	1	1	0
1	1	1	0	1	1	0	1	1	0
1	1	0	0	1	0	1	1	1	1
1	1	1	1	1	1	0	1	1	0
1	1	1	1	0	1	1	1	1	1
1	1	1	0	1	1	0	1	1	1
1	1	0	1	1	1	1	0	1	1
1	0	1	1	0	1	1	1	1	1
0	1	0	0	1	1	1	1	1	1
1	0	1	0	1	1	1	1	1	0
1	0	1	1	1	1	1	1	0	0
1	1	1	1	0	1	1	0	1	1
1	1	1	1	1	0	0	1	0	1
1	1	1	1	1	1	1	1	1	1
1	1	1	0	1	0	1	1	1	1
1	1	1	0	0	1	1	0	0	1
1	1	1	1	1	1	0	1	1	0
1	0	1	1	0	1	0	1	1	1
1	1	0	0	0	1	1	1	1	1
0	1	1	1	1	1	1	0	1	0
0	1	0	1	1	1	1	0	1	0
1	1	1	1	1	1	1	1	1	1
1	1	0	1	1	1	1	1	1	1
1	0	1	1	1	0	1	1	1	1
1	0	1	0	1	0	1	1	1	0
0	1	1	1	0	1	0	1	0	1
0	0	0	0	1	1	1	1	1	1
1	1	0	0	1	1	1	1	0	1
1	1	1	1	1	1	1	0	1	1
1	1	1	1	1	0	0	1	0	1
0	1	1	1	1	0	0	1	0	1
1	1	1	0	1	0	0	0	0	1
1	1	1	1	1	1	0	1	1	1
1	1	0	0	1	1	1	1	1	1
1	1	1	1	0	1	0	1	0	0
1	1	1	1	1	1	1	1	1	1
1	1	1	1	0	1	0	1	1	1
1	1	1	1	1	1	1	1	1	0
1	0	0	1	1	1	1	1	1	1
1	1	1	1	1	1	1	1	0	1
1	1	0	1	0	0	1	1	1	1
1	1	1	1	0	1	1	0	0	1
1	1	1	1	1	1	1	1	1	1
1	0	1	0	1	1	1	1	1	1
1	1	1	1	1	1	1	1	1	1
0	1	1	1	1	0	1	1	1	0
1	1	1	0	0	0	1	1	1	0
1	0	1	1	1	1	1	0	0	0
1	0	1	1	0	1	1	1	1	1
0	1	1	1	0	1	1	1	1	1
0	1	1	1	1	1	0	1	1	1
1	1	1	1	1	0	1	1	1	1
0	1	1	1	1	0	1	1	1	1
1	1	0	1	1	1	1	0	1	1
1	1	1	0	0	1	1	0	1	0
1	1	1	1	1	1	1	1	1	0
1	0	0	1	0	1	1	1	1	0
1	1	1	1	1	0	1	1	1	1
1	1	1	1	1	1	1	0	1	1
1	1	0	1	0	1	1	0	0	1
1	0	1	1	1	1	1	1	1	1
0	1	1	1	1	1	1	1	1	1
1	1	1	1	0	0	0	1	0	1
1	0	1	1	0	0	0	1	1	1
0	1	0	1	1	1	0	1	0	1
1	1	1	1	1	1	1	1	1	1
1	0	1	1	1	0	1	1	1	0
1	1	1	1	0	1	1	1	0	1
0	1	0	1	1	0	1	1	0	1
1	1	1	1	0	1	1	1	1	1
0	0	1	1	1	1	1	1	1	1
1	1	1	1	1	1	1	0	0	1
1	1	1	1	1	1	1	0	1	1
1	1	1	0	1	1	0	1	0	1
0	1	0	1	0	0	1	1	1	1
0	0	1	1	1	1	1	1	1	1
1	1	1	1	1	1	1	1	0	1
0	1	1	1	1	0	1	0	0	1
1	1	1	1	1	1	0	0	1	1
0	1	1	1	1	1	1	1	0	1
1	1	1	1	1	1	0	1	0	0
0	1	1	0	1	1	1	1	1	0
0	0	1	0	1	0	1	1	0	1
1	1	1	1	0	1	1	0	1	1
1	1	1	1	0	1	1	1	0	0
1	1	1	1	0	1	1	1	1	1
1	1	0	1	1	1	1	1	0	0
1	0	1	1	1	1	0	1	1	1
1	1	0	1	0	0	1	1	1	1
1	1	1	0	1	1	0	0	1	0
1	0	1	1	1	1	1	0	0	0
1	1	1	0	0	1	0	1	0	1
1	1	1	1	0	1	1	1	1	1
1	1	1	1	1	1	1	0	1	1
1	0	1	1	1	1	1	1	1	0
1	1	1	1	1	1	0	1	1	1
0	0	0	1	1	1	1	1	1	1
1	1	1	1	0	1	1	0	1	1
1	1	1	1	0	0	1	0	0	1
1	0	1	1	1	0	1	0	1	0
1	1	1	1	1	0	1	1	1	1
1	1	1	1	1	1	1	1	0	0
1	1	0	1	1	1	1	0	1	1
1	1	1	1	0	1	1	1	1	1
0	1	1	1	1	1	0	1	1	1
1	1	1	1	1	1	1	0	1	0
1	1	1	1	1	1	0	0	0	1
0	1	0	1	0	0	0	0	1	1
1	1	1	1	1	1	1	1	0	0
1	1	1	1	1	1	1	1	1	1
1	1	1	1	1	1	1	1	1	1
1	1	1	1	1	1	1	1	1	1
0	1	1	1	1	1	1	1	0	1
1	1	1	1	0	1	1	1	1	1
1	1	1	1	1	0	1	1	1	0
1	1	0	0	1	1	0	1	1	1
1	0	0	1	1	1	1	0	1	1
1	0	0	1	1	1	1	1	1	0
0	0	1	1	1	1	1	0	1	1
0	1	1	1	1	0	1	1	1	1
1	1	0	1	1	1	1	0	0	1
1	1	1	0	1	1	0	1	1	1
1	1	1	1	1	1	1	1	1	1
1	1	0	1	1	0	1	1	1	0
0	0	1	1	1	1	1	1	1	1
1	1	1	1	1	1	0	1	0	1
1	0	1	1	0	1	1	1	0	0
1	1	1	1	0	1	1	0	1	1
1	1	1	1	1	0	0	1	1	1
1	0	0	1	1	1	1	1	0	0
0	1	1	0	1	1	1	1	1	0
1	0	1	1	1	1	0	1	1	1
1	0	0	1	1	1	0	1	0	0
1	0	1	0	0	1	1	1	1	1
0	0	1	1	0	1	0	1	1	1
0	0	1	1	0	1	1	1	1	0
1	1	1	1	0	0	1	0	0	1
0	1	0	1	0	1	1	1	1	1
0	1	1	1	1	0	1	1	1	0
0	1	1	1	1	0	1	1	1	1
0	1	1	0	1	1	1	1	1	1
1	1	1	1	1	1	0	1	1	1
1	1	1	1	1	1	1	1	0	0
1	1	0	1	1	0	1	1	1	0
0	1	0	0	1	1	1	1	1	1
1	1	1	1	1	1	0	0	0	0
1	0	1	1	0	1	1	0	1	0
0	1	1	1	1	0	0	1	1	1
1	1	1	0	1	1	0	1	1	0
1	1	1	1	1	1	1	1	1	0
1	1	1	1	1	0	1	1	1	1
1	0	1	1	1	0	1	1	1	1
1	1	1	1	0	0	1	0	0	0
1	0	1	0	1	1	1	1	1	1
1	1	1	1	1	1	1	1	0	1
1	0	0	1	1	1	1	0	1	0
0	1	1	1	1	1	1	1	1	1
1	1	1	0	1	0	1	1	0	1
1	1	0	1	0	1	1	1	1	0
1	1	1	1	1	1	0	1	1	1
1	1	1	0	1	1	1	1	1	1
1	1	1	1	1	0	1	1	1	1
1	1	1	1	0	1	1	1	1	0
1	1	1	0	1	1	1	1	1	1
0	1	1	1	1	0	0	0	1	0
1	0	1	1	1	1	1	1	0	0
1	1	1	1	1	0	1	0	1	1
1	1	0	0	1	1	1	0	1	1
1	0	1	1	1	1	1	1	0	0
1	1	1	1	1	1	0	0	0	1
1	1	1	1	1	0	1	0	0	1
1	1	1	0	1	0	1	1	0	1
0	1	1	0	1	1	1	1	1	1
0	1	1	1	0	0	1	1	1	1
1	1	0	1	0	1	1	1	1	0
1	1	1	1	0	1	1	1	0	1
1	1	1	1	1	1	1	1	1	1
1	1	0	1	1	1	1	1	0	1
1	1	1	1	1	1	1	1	1	1
1	1	1	1	1	1	1	1	1	1
1	1	1	1	1	0	1	1	1	1
1	0	1	1	0	0	1	0	1	1
1	0	1	1	0	1	1	1	1	1
1	1	1	1	0	0	1	0	1	0
1	1	1	1	1	1	1	1	1	0
0	1	1	1	1	1	0	1	0	0
0	0	1	1	0	1	1	1	1	1
0	0	1	1	1	1	1	1	0	1
1	1	1	1	1	1	0	1	0	1
1	0	1	1	1	1	1	0	1	1
1	1	1	1	1	1	1	1	0	1
1	1	1	1	0	0	1	1	0	1
0	0	1	0	0	1	1	1	1	1
1	1	1	1	1	1	1	1	0	1
1	0	1	1	1	1	1	1	1	1
1	1	1	1	0	1	1	1	0	1
1	0	1	1	1	1	0	0	1	1
1	1	1	1	1	1	1	1	1	1
1	1	1	0	1	1	1	1	1	1
0	1	0	1	1	1	1	1	1	1
1	0	1	1	1	0	1	1	0	1
1	0	1	1	1	1	1	1	1	1
1	1	1	1	0	1	0	1	0	1
1	1	1	1	1	1	1	1	1	1
1	0	0	0	1	1	1	1	1	0
1	1	1	0	1	1	0	0	1	1
1	1	0	1	1	0	1	0	0	1
1	1	1	0	0	1	1	1	1	1
1	0	0	1	1	1	0	1	1	0
1	1	1	1	0	1	1	1	0	1
0	1	1	1	1	1	1	0	1	1
1	0	1	1	0	0	0	1	1	1
0	0	1	1	0	1	1	1	1	1
0	1	1	1	1	1	0	1	1	1
0	0	1	1	1	0	1	1	1	1
1	0	1	1	1	0	1	1	0	1
1	1	1	1	1	0	1	1	1	1
1	1	0	1	1	1	0	0	1	1
1	1	0	1	1	1	1	1	1	1
1	1	1	1	1	1	1	0	1	1
1	1	1	1	0	1	1	0	0	1
1	0	1	1	1	1	1	1	0	1
1	1	0	1	0	0	1	1	0	1
1	1	1	1	0	1	0	1	0	1
1	1	1	1	0	0	1	1	1	1
1	1	1	1	1	1	1	1	1	1
0	1	1	1	0	0	1	1	0	1
1	1	1	0	1	1	1	0	1	0
1	1	1	1	1	1	1	0	1	1
1	1	0	0	0	0	1	1	0	1
1	1	0	1	1	0	1	1	0	1
1	1	1	1	1	1	1	1	1	1
0	1	0	1	0	0	1	1	0	1
0	0	1	1	1	1	1	0	0	1
1	0	0	1	1	1	1	1	1	1
0	1	1	1	0	1	1	1	1	1
0	1	1	1	1	0	1	1	0	1
1	1	0	1	1	1	0	0	1	1
0	1	1	1	1	1	0	0	1	1
0	1	0	0	1	1	1	1	1	1
1	1	0	1	1	1	1	0	1	1
1	1	1	1	1	1	1	1	1	1
0	1	1	1	1	1	1	1	1	1
1	1	0	0	1	1	1	1	0	1
1	0	1	1	1	1	1	1	1	1
1	1	1	1	1	1	1	0	1	1
1	1	1	1	1	0	1	1	0	1
1	1	0	1	1	1	0	1	1	1
1	1	0	1	0	1	1	1	1	1
1	0	1	0	1	0	1	1	1	1
1	1	0	1	1	0	1	1	0	1
1	0	1	1	0	1	0	1	1	1
1	1	1	1	1	1	1	1	0	1
1	1	0	1	1	0	1	0	1	1
0	1	1	1	1	1	1	1	0	0
0	1	1	0	1	1	0	1	1	1
1	1	1	1	0	1	0	1	1	1
0	1	1	1	1	0	1	1	0	1
0	0	1	1	1	0	1	0	1	1
0	1	1	0	1	0	0	1	1	1
1	1	1	1	0	0	1	1	1	1
0	1	0	1	1	1	1	1	1	0
0	0	1	1	1	1	1	1	1	1
1	1	0	1	1	1	1	1	1	1
1	1	1	1	1	1	1	1	1	1
0	0	0	1	0	0	1	1	1	1
1	1	1	1	1	0	1	1	1	1
1	1	1	1	1	0	1	0	1	1
1	1	0	1	0	1	1	1	0	1
1	1	1	1	1	1	0	1	1	1
1	1	0	1	0	1	1	1	1	1
1	1	1	0	1	0	0	0	1	1
0	1	0	1	1	1	1	1	1	1
1	1	1	1	1	1	0	1	1	0
1	0	0	0	1	1	1	1	1	1
1	1	1	1	1	1	0	1	1	1
1	1	0	1	1	1	1	1	1	0
1	1	1	1	1	1	1	1	0	1
0	1	1	1	1	1	1	1	1	0
1	1	1	1	1	1	0	1	1	1
1	0	1	0	1	1	1	1	1	0
0	1	1	1	1	1	0	1	1	1
1	1	1	1	1	1	1	1	0	0
1	1	1	1	1	1	1	1	1	1
0	1	0	1	1	1	1	0	1	1
1	1	1	0	0	1	1	1	1	1
1	1	0	1	0	1	1	1	1	1
0	1	1	1	1	0	1	1	1	1
1	1	1	1	1	1	1	0	1	0
1	1	1	1	1	1	0	1	1	1
1	1	0	1	1	0	1	1	1	1
1	1	0	0	1	1	1	1	1	1
1	1	0	1	1	1	1	1	1	0
0	0	1	1	1	1	1	0	1	1
1	1	1	1	1	0	1	1	1	1
1	0	0	1	0	0	1	1	0	1
1	1	0	1	1	0	1	0	1	0
1	1	1	1	1	1	1	1	1	1
1	1	1	1	1	1	1	1	1	1
1	1	0	1	1	1	1	0	1	1
1	1	1	0	1	1	1	1	1	0
1	1	0	1	1	1	0	1	1	1
1	1	0	1	1	1	1	1	1	0
1	1	1	0	0	1	0	1	1	0
0	1	1	1	0	1	0	1	1	1
1	1	1	1	0	1	1	1	1	1
1	1	1	0	1	1	1	1	1	1
1	1	1	1	1	0	1	1	0	1
1	1	1	1	1	1	1	1	1	1
0	1	1	1	1	1	1	1	1	0
1	0	1	1	0	1	1	1	1	1
1	1	1	0	1	1	1	1	0	1
1	1	0	1	0	1	0	1	1	1
0	1	1	1	1	1	1	1	1	1
1	1	1	0	1	1	0	1	1	1
1	1	1	1	1	1	1	1	1	1
1	1	1	1	1	1	0	1	1	0
1	1	0	0	0	0	0	0	1	1
1	0	0	1	1	1	1	1	1	1
0	1	0	0	1	0	1	0	1	1
1	1	1	1	0	1	0	1	1	1
0	1	1	1	1	1	1	0	1	0
1	0	1	0	1	0	1	1	1	1
1	1	1	0	0	1	0	1	1	0
1	1	0	1	0	0	1	0	1	0
1	0	1	1	0	0	1	0	1	1
1	1	0	1	1	0	1	1	1	1
1	1	1	1	0	1	1	0	1	0
1	1	1	1	1	0	1	0	1	0
1	1	1	1	0	0	0	0	1	1
0	1	0	1	1	1	0	1	1	1
1	1	1	1	1	1	0	1	1	1
1	1	1	1	1	1	0	1	1	0
1	1	1	1	1	1	1	1	1	1
1	1	1	0	1	1	1	1	1	1
0	1	0	1	1	0	1	1	1	1
0	1	0	0	1	0	0	0	1	1
0	1	1	1	1	1	1	1	1	1
1	1	0	1	0	0	0	1	1	1
1	0	1	0	1	1	1	1	1	1
0	1	1	1	1	1	0	1	1	1
0	0	1	0	1	1	1	1	1	1
1	1	1	0	1	1	1	1	1	1
0	1	1	1	1	1	1	0	1	1
1	0	1	1	0	1	1	1	1	0
1	0	1	1	1	1	0	1	1	0
1	1	1	1	1	1	0	0	0	1
1	1	1	0	0	1	1	1	1	1
1	1	1	1	1	1	1	1	0	1
1	1	1	1	0	1	1	1	0	1
1	1	1	1	1	1	1	0	1	1
0	1	1	0	0	1	1	1	1	1
1	0	1	1	1	1	1	1	1	1
1	1	1	1	1	1	1	1	1	1
1	1	1	0	1	1	1	1	1	1
1	1	0	0	1	1	1	0	1	1
1	1	1	1	1	1	0	1	1	1
1	1	1	0	1	1	1	1	1	1
1	1	1	1	1	1	1	0	0	1
1	1	0	0	1	1	1	0	0	1
0	1	1	0	0	1	1	1	1	1
1	1	1	1	0	1	1	0	1	1
1	1	1	1	1	0	1	1	1	1
1	1	1	1	1	1	1	0	0	0
1	1	1	1	1	1	1	1	1	1
1	1	0	0	1	0	1	1	1	0
1	1	1	0	1	1	1	1	0	1
1	1	1	1	1	1	1	1	1	1
1	0	0	1	1	1	1	1	1	1
1	0	1	1	1	1	1	1	1	1
1	1	0	1	1	1	1	1	1	1
1	1	1	1	1	1	1	1	0	0
1	0	1	1	1	1	1	0	1	0
1	1	1	0	0	1	0	1	1	1
1	0	0	0	0	1	0	1	1	0
1	1	1	1	1	0	1	1	1	0
0	1	1	1	1	1	1	0	1	1
1	1	1	1	1	1	1	1	1	0
1	1	0	1	1	1	1	1	1	1
1	1	1	0	1	1	1	1	1	0
1	1	1	1	0	1	1	1	0	1
1	1	1	1	1	1	1	1	1	1
0	1	1	1	1	1	0	0	1	1
1	1	1	1	1	1	1	0	1	0
1	1	1	1	1	1	1	1	0	0
0	1	1	1	1	0	1	1	1	0
0	0	1	0	1	1	0	1	1	1
1	1	1	0	1	1	1	1	1	0
1	0	0	1	1	1	1	0	1	1
1	0	1	1	1	1	1	1	1	1
1	1	0	1	1	1	1	1	1	1
0	1	1	1	0	0	1	1	1	1
0	1	1	1	1	1	1	1	0	1
1	1	1	0	1	1	1	1	1	1
1	1	1	1	1	1	1	1	1	1
0	0	1	0	1	1	1	1	1	1
1	0	1	1	1	1	1	1	0	0
1	1	1	1	0	1	0	1	1	1
1	1	0	1	1	1	1	1	1	0
1	1	1	0	1	1	1	1	1	1
1	0	1	0	1	1	1	1	1	1
1	1	0	0	0	1	1	1	1	0
1	1	1	1	1	1	1	0	1	0
1	1	1	0	1	0	1	1	1	1
1	1	0	0	1	1	1	1	1	1
1	1	1	0	1	1	0	1	1	1
1	1	1	1	0	1	1	1	1	1
1	1	1	0	1	1	1	1	1	1
0	1	0	1	0	1	1	1	0	1
1	1	0	0	0	1	1	1	1	1
0	1	1	1	1	1	1	1	1	1
1	1	1	1	1	1	1	1	1	1
1	1	1	0	1	1	0	1	1	0
1	1	1	0	1	1	0	1	1	0
1	1	1	0	1	1	1	1	1	1
0	1	1	1	0	1	1	0	1	1
1	1	1	1	1	1	1	1	1	0
1	1	1	1	1	1	1	0	1	0
1	1	1	1	1	1	1	1	1	1
1	1	1	1	1	1	1	1	0	1
1	1	1	1	0	1	0	1	1	1
1	1	1	0	1	1	1	1	1	1
1	0	1	1	1	1	1	1	1	1
1	1	0	0	1	1	1	1	1	1
0	1	0	0	1	1	1	1	0	1
1	1	1	0	1	1	1	1	0	1
1	1	1	0	1	1	1	1	1	1
1	0	1	0	1	1	0	1	1	0
1	0	1	1	1	1	1	1	1	1
1	0	1	1	1	0	1	1	1	1
1	1	1	1	1	1	0	1	1	1
1	1	1	0	0	1	0	1	0	1
1	1	0	1	1	1	0	1	1	1
1	1	1	1	1	1	1	0	1	1
1	1	0	1	1	1	1	1	1	1
1	1	0	1	1	1	0	0	1	1
1	1	0	0	1	1	1	1	1	1
0	1	1	0	1	1	1	0	0	1
1	1	1	0	1	1	1	1	1	1
1	1	0	1	1	1	1	0	0	1
0	1	1	1	0	1	1	1	0	1
1	1	1	0	1	1	1	1	1	0
1	0	1	1	1	1	0	0	1	1
1	1	1	1	1	1	1	1	1	1
1	0	1	1	1	1	1	1	1	1
1	1	1	1	1	1	1	0	1	1
1	1	1	1	1	1	1	1	1	1
0	1	0	1	0	0	1	1	1	1
1	0	0	0	1	0	1	1	1	1
1	0	1	0	1	1	0	1	1	1
1	0	1	0	1	1	0	1	1	1
0	1	1	0	1	1	1	1	0	1
1	1	1	0	0	0	1	0	1	1
1	1	1	0	1	1	1	1	1	1
0	1	1	1	1	1	1	0	1	1
0	1	1	1	1	0	0	1	0	0
1	1	0	1	1	1	0	1	1	1
1	1	1	1	0	0	1	1	1	1
0	1	1	1	1	1	1	0	0	1
1	0	0	1	1	0	1	0	1	1
0	1	1	0	1	1	1	1	0	1
1	1	1	1	1	1	1	1	1	1
1	1	0	1	1	1	1	0	1	1
1	1	0	1	0	0	1	1	1	0
1	1	1	1	1	1	0	1	1	1
1	1	1	1	1	1	1	1	1	1
1	1	0	1	1	1	1	0	1	0
1	1	1	1	1	1	1	1	1	1
1	1	1	1	1	1	1	1	0	0
1	1	1	1	1	1	1	0	1	1
1	1	1	0	1	1	0	1	0	1
0	0	1	1	1	1	1	1	1	0
0	1	0	1	0	1	1	1	0	0
1	0	1	1	0	1	1	1	1	1
1	1	1	1	1	0	1	1	0	0
0	1	1	1	0	0	1	1	1	0
0	1	0	1	1	1	0	1	1	1
1	0	0	1	1	1	1	1	0	1
1	1	0	1	1	1	1	1	1	1
1	1	0	1	1	1	1	1	1	1
1	1	0	0	1	1	1	1	1	1
1	1	1	1	1	1	1	0	1	1
1	1	1	1	1	1	0	1	1	1
1	0	1	1	0	0	0	1	0	1
1	0	1	1	1	1	1	1	0	1
1	1	1	0	0	1	1	0	1	0
0	1	1	1	1	1	1	1	1	1
1	1	1	1	0	0	1	1	1	1
1	0	0	1	1	1	0	1	0	0
1	1	1	1	1	1	0	1	0	0
1	1	1	1	1	1	1	1	1	1
1	0	1	1	1	1	1	1	1	0
1	0	1	1	1	1	1	1	1	0
1	1	1	1	1	1	1	1	1	0
1	1	0	1	0	0	0	1	0	0
0	1	0	0	0	1	0	1	0	1
1	1	1	1	0	1	0	1	1	1
1	1	1	1	1	0	1	1	0	1
1	1	1	0	1	1	1	1	1	0
1	1	0	1	1	1	1	1	1	1
1	1	1	0	1	1	1	1	1	1
1	1	1	1	1	1	1	1	0	1
1	1	1	1	1	0	1	1	0	1
1	0	1	1	1	1	1	1	1	0
1	1	1	1	1	0	0	1	1	0
1	1	1	1	1	1	1	1	1	1
0	1	1	1	1	0	0	0	1	0
1	1	1	1	1	1	1	1	1	1
1	0	1	1	1	1	1	1	1	0
0	0	1	1	1	1	1	0	1	1
0	1	1	1	1	1	0	1	1	1
1	1	1	0	1	1	1	1	1	0
1	1	1	1	1	0	1	0	1	1
1	1	1	1	0	1	1	1	1	1
1	1	0	0	0	1	1	1	1	1
0	1	1	0	1	1	0	1	1	1
1	1	1	1	1	0	0	1	1	1
1	1	1	0	0	0	1	1	1	0
0	1	1	1	1	1	1	0	0	1
0	1	1	1	1	1	1	1	1	1
0	1	0	1	1	0	1	1	1	0
0	1	0	1	1	1	1	1	0	0
1	1	1	1	1	1	1	1	1	1
1	1	1	1	1	1	1	1	0	0
0	1	1	1	1	1	1	0	1	1
1	1	1	1	1	1	0	1	1	0
0	1	0	1	1	1	1	1	1	1
1	0	1	1	1	1	1	0	1	1
1	1	1	1	1	1	1	1	1	1
1	1	1	1	1	1	1	1	1	1
1	1	0	1	1	1	1	0	0	1
0	1	1	0	1	0	1	1	0	1
1	0	1	1	1	0	1	1	1	0
1	1	1	0	1	1	1	1	1	1
1	1	1	1	1	1	1	1	0	1
1	1	1	1	0	1	0	1	1	0
1	1	1	1	0	1	0	1	0	1
1	1	1	1	1	1	1	0	1	0
0	1	1	1	1	1	1	1	0	1
0	1	1	0	0	0	1	1	1	0
0	1	0	1	0	1	1	0	1	1
1	1	1	1	0	0	1	1	1	1
0	1	1	1	1	1	1	1	1	1
1	0	1	1	1	1	1	1	1	1
1	1	1	0	1	0	0	1	1	1
1	1	1	1	1	1	1	1	1	1
0	0	1	1	1	1	1	1	1	1
1	1	1	0	1	0	1	1	0	0
1	1	1	1	1	1	1	1	1	1
1	0	0	1	1	1	1	1	0	0
1	0	1	0	1	1	1	1	1	0
1	0	0	1	1	1	1	1	1	1
0	1	1	1	1	1	1	1	1	1
1	1	1	1	1	0	0	1	1	1
1	1	1	1	1	0	1	1	1	0
1	1	1	1	0	1	1	0	1	0
0	1	0	1	0	1	1	1	1	1
0	1	1	0	0	0	1	1	1	0
1	1	1	1	1	1	1	1	0	1
0	1	1	1	1	1	1	1	1	0
0	1	0	1	1	1	1	1	1	1
0	1	0	1	1	0	0	1	1	1
1	1	0	1	1	1	1	1	1	0
0	0	1	1	1	1	0	1	1	0
1	1	0	1	1	0	1	1	0	1
0	1	1	1	0	1	1	1	1	0
1	0	1	1	1	0	1	1	1	0
1	0	1	0	0	1	1	1	0	0
0	0	1	1	1	1	1	0	1	1
1	1	1	1	1	1	1	1	1	1
1	1	1	1	1	1	1	0	0	0
0	1	1	0	1	1	1	1	1	1
0	1	1	1	1	1	1	0	0	0
1	0	1	1	0	1	1	1	1	1
1	1	1	1	1	1	1	1	1	1
0	1	0	1	1	1	0	1	0	1
0	1	0	1	1	0	1	0	1	0
1	1	1	0	0	1	1	1	1	1
1	1	1	1	0	1	1	1	1	1
0	1	1	1	0	0	1	1	1	1
1	1	1	1	1	1	1	1	1	1
1	1	1	0	0	1	1	1	1	1
1	1	1	1	1	1	1	0	1	0
0	0	1	1	1	1	1	0	1	1
0	1	1	1	1	1	1	1	1	1
1	1	1	1	0	1	1	0	1	0
1	1	1	1	0	0	1	1	1	0
1	1	1	1	0	1	1	1	0	1
1	0	1	1	1	0	1	1	1	0
1	0	1	1	1	1	1	1	1	0
0	1	1	1	0	0	0	0	1	1
1	1	0	1	1	1	1	1	1	0
1	1	1	1	0	1	1	1	1	1
1	1	1	1	1	0	1	1	0	1
0	1	1	0	0	1	0	1	1	0
0	0	0	1	1	1	1	1	1	1
1	0	1	1	1	1	1	1	1	1
1	1	1	1	1	1	1	1	1	1
1	1	1	1	1	1	1	1	1	1
1	1	1	1	1	1	1	1	0	1
1	1	1	1	1	1	1	0	1	0
1	1	1	1	1	1	0	0	1	1
0	1	1	1	1	0	1	1	1	0
1	1	1	1	1	0	1	1	1	1
1	0	1	1	1	1	0	1	1	1
1	1	1	1	1	0	1	1	1	1
1	1	1	1	1	0	1	1	1	1
1	1	1	1	1	1	1	1	1	1
1	1	1	1	1	0	1	0	1	1
1	1	1	1	1	0	1	0	1	1
1	1	1	1	1	1	1	1	1	1
1	1	1	1	1	1	1	0	0	1
0	0	1	1	1	1	1	1	1	1
0	1	0	1	1	1	1	1	1	1
1	1	0	0	1	1	1	1	1	1
1	1	0	1	1	1	1	1	0	1
1	1	0	1	1	1	1	1	0	1
0	1	0	1	1	1	1	1	1	1
0	1	0	1	0	1	0	1	1	1
1	1	1	0	0	1	1	0	1	0
1	0	1	0	1	1	1	0	1	0
1	1	1	1	1	1	1	1	1	1
1	0	1	1	1	0	1	0	1	1
1	1	1	1	1	1	1	1	0	1
1	1	1	1	1	1	1	1	1	1
1	1	0	1	1	1	1	1	1	0
0	1	0	1	0	1	1	1	1	1
1	1	1	0	1	1	0	1	1	1
1	1	1	1	0	0	1	0	1	1
0	1	1	1	1	1	1	1	1	0
1	1	1	1	1	0	1	1	1	1
0	1	0	1	0	0	0	1	0	1
1	1	0	1	1	1	1	1	1	1
1	1	1	1	1	0	0	1	0	1
1	1	1	1	1	0	1	1	1	1
1	1	1	1	0	1	1	1	1	0
0	0	0	1	1	1	1	0	0	1
0	0	1	1	1	1	1	0	1	1
1	1	1	1	0	0	1	0	1	0
1	1	1	1	1	1	0	1	1	1
1	1	1	1	1	1	1	0	1	1
0	1	0	1	1	0	0	1	0	1
0	1	0	1	1	1	1	1	0	1
0	1	1	1	0	1	1	1	1	0
1	1	0	1	0	0	0	1	1	1
0	1	0	1	1	1	0	0	0	0
0	0	1	1	1	1	1	1	1	1
1	1	1	1	1	1	1	0	1	1
0	1	0	1	1	0	1	0	1	0
1	1	0	1	1	1	0	1	1	1
1	1	1	0	1	0	0	0	1	1
1	1	1	0	1	1	1	1	1	1
0	1	0	0	1	0	1	1	1	1
1	1	0	1	1	1	1	1	1	1
0	1	1	1	1	0	1	1	1	0
0	0	1	1	1	1	1	1	0	1
1	1	1	1	0	1	1	1	0	1
1	1	1	1	0	1	1	1	0	1
1	1	1	0	1	1	1	1	1	1
1	1	1	1	1	1	1	1	1	1
1	1	0	1	1	0	1	0	1	1
1	0	0	1	1	1	1	1	0	1
0	1	1	1	1	1	1	1	1	1
1	1	1	1	1	1	0	0	1	1
1	1	0	1	0	1	1	0	0	1
0	1	0	1	1	1	1	1	1	1
1	1	1	1	0	0	1	0	1	1
1	0	1	1	1	1	0	1	1	1
1	1	1	0	1	1	1	0	1	1
1	1	0	0	1	1	1	0	1	0
1	1	1	1	1	1	1	1	1	1
1	1	0	1	1	0	1	1	1	1
0	0	1	0	1	1	1	1	0	0
0	1	1	1	1	0	1	1	1	1
1	1	0	0	1	0	1	0	1	1
1	1	1	1	1	0	1	1	1	1
0	1	0	1	1	0	1	0	1	1
0	1	1	1	0	1	1	1	1	1
1	1	1	1	1	0	1	1	1	0
0	0	0	1	1	1	1	1	1	1
1	0	1	0	1	1	1	0	0	1
1	1	0	1	1	1	1	1	1	1
0	1	1	1	1	1	1	1	0	1
1	1	1	1	0	1	1	0	1	1
1	1	1	1	1	1	0	0	1	0
1	1	0	1	1	0	1	1	1	1
1	1	0	1	1	0	1	1	1	1
0	1	0	0	1	1	1	0	1	1
1	0	1	1	1	1	1	1	0	1
1	1	1	1	1	0	1	1	1	1
1	1	1	1	1	1	1	1	1	1
1	0	1	1	1	1	1	1	1	1
1	0	1	1	1	1	1	1	1	1
1	0	1	1	1	1	1	1	1	1
1	1	1	0	0	1	1	1	1	0
0	1	1	1	0	1	1	1	1	1
1	1	0	1	1	1	1	0	1	1
0	1	1	1	1	1	0	0	1	1
1	0	1	1	1	1	0	0	1	1
1	1	1	1	1	1	1	1	1	1
0	1	0	1	1	0	1	0	1	1
1	1	1	1	1	1	1	1	1	0
1	1	1	1	0	1	0	1	1	1
1	1	1	1	1	1	1	1	1	1
1	1	1	1	1	1	1	0	1	0
1	1	0	1	1	0	1	1	1	1
0	1	1	1	0	1	1	0	0	1
1	0	1	1	1	0	1	0	1	1
0	1	1	1	0	1	1	1	1	1
1	1	1	1	1	0	0	0	0	1
1	0	1	1	1	1	0	0	1	1
1	0	1	1	1	1	1	1	1	1
0	1	1	1	1	1	1	1	1	1
1	1	1	0	1	1	1	0	1	0
1	1	1	1	0	1	1	1	1	1
0	0	1	1	1	0	0	1	1	1
0	0	1	1	1	1	0	0	1	1
0	0	0	1	1	1	0	0	1	1
0	1	1	1	1	1	1	1	0	1
0	0	0	0	1	1	0	0	1	1
0	1	1	1	1	1	1	1	1	1
1	0	0	1	1	1	1	1	1	1
1	1	1	1	1	0	1	1	1	1
1	0	0	1	0	1	1	0	1	0
1	1	1	1	1	1	0	0	1	1
1	1	1	1	1	1	1	1	1	0
0	1	1	1	0	0	0	1	1	1
1	0	1	1	1	1	0	1	1	1
1	1	1	1	1	1	1	1	1	1
0	0	1	1	1	1	1	0	1	1
1	1	1	1	1	0	0	1	1	0
1	0	1	1	0	1	0	0	1	1
1	0	1	1	1	1	1	0	1	0
1	0	1	1	1	1	1	1	1	1
1	1	1	1	1	1	1	1	1	1
1	0	1	1	1	0	1	0	1	1
1	1	1	1	1	0	1	1	0	1
1	0	1	1	1	1	1	0	1	1
1	1	0	1	1	1	1	0	0	1
1	0	0	1	1	1	1	1	1	0
0	0	0	0	0	0	1	0	1	1
1	1	0	1	0	1	1	0	0	1
1	0	0	1	1	1	0	1	0	1
0	1	1	1	1	1	0	1	0	1
1	1	1	1	1	1	1	0	1	1
1	1	0	1	1	0	1	1	0	1
1	1	1	1	1	1	1	1	1	1
1	1	1	1	1	0	1	1	1	0
0	1	1	1	1	1	1	1	1	1
0	1	1	0	0	1	1	0	1	1
1	0	1	1	1	1	1	1	1	1
1	0	0	1	1	1	1	1	1	1
0	1	0	1	1	1	1	1	1	1
0	1	1	1	1	1	0	1	1	1
1	1	1	1	0	0	1	1	1	1
1	1	0	1	1	1	1	0	1	1
1	1	1	1	1	1	1	1	1	1
1	1	1	1	0	1	1	1	1	1
1	1	1	0	1	1	1	0	0	1
0	1	1	1	0	1	1	1	1	1
1	0	1	1	1	1	1	1	1	1
1	1	1	1	0	1	0	1	0	1
1	1	1	1	1	1	1	0	1	1
0	1	1	0	1	0	0	1	1	1
1	1	1	1	0	1	1	0	1	1
1	1	1	1	0	1	1	1	1	1
1	0	1	1	1	1	1	0	1	1
1	1	1	1	1	1	1	1	1	1
0	1	1	1	1	1	1	1	1	1
1	1	1	1	1	1	1	1	0	1
1	0	1	1	1	1	0	1	0	1
1	1	1	1	1	1	1	0	1	0
1	1	0	1	1	1	1	1	1	1
0	1	0	0	1	1	0	1	0	1
1	0	0	0	0	0	0	1	0	1
1	1	0	1	1	0	1	0	0	1
1	0	1	1	1	0	0	1	1	1
1	1	1	1	0	1	1	0	1	1
1	1	1	1	1	1	1	1	1	1
1	1	1	1	0	0	1	0	1	1
1	0	1	1	1	1	1	1	1	1
1	1	1	1	0	1	1	1	0	1
1	1	1	0	1	1	1	0	1	1
1	1	1	1	1	1	1	0	1	1
1	0	1	1	1	1	1	0	1	1
1	1	1	1	1	1	1	1	1	1
1	1	0	1	1	1	1	1	0	1
0	1	1	0	1	0	1	0	1	1
1	1	1	0	1	1	0	1	1	1
0	0	1	1	1	1	0	0	0	1
1	1	1	0	0	1	0	1	0	1
0	0	1	1	1	1	1	0	1	1
1	1	1	1	0	1	0	0	1	1
1	1	1	0	1	0	1	1	0	0
1	1	1	0	1	1	1	1	1	0
1	1	0	0	0	1	1	1	1	1
1	1	1	1	1	1	1	0	0	1
1	1	0	1	1	1	1	1	1	1
1	0	1	1	1	0	0	1	0	1
1	0	1	1	1	1	0	1	0	1
1	1	1	1	1	1	0	1	1	0
0	1	1	1	0	0	1	1	1	1
0	1	0	1	1	0	1	0	0	1
1	1	0	1	1	1	1	1	1	1
1	1	1	1	1	1	1	1	1	1
1	0	0	1	1	1	0	1	0	1
1	1	1	1	1	1	0	1	1	0
0	0	1	1	1	0	0	1	0	0
1	1	0	1	1	0	0	1	1	1
1	0	1	1	1	1	0	1	1	0
1	1	1	1	0	1	1	1	0	1
1	1	1	1	1	1	0	1	1	1
1	1	1	0	1	1	0	1	1	1
1	0	0	1	1	1	0	1	1	1
1	1	1	1	1	1	1	1	1	1
1	1	1	1	0	0	1	1	1	1
1	1	0	1	1	1	1	1	1	1
1	1	1	1	1	1	1	1	1	1
1	1	1	1	1	0	1	1	1	1
1	1	1	1	1	1	1	1	0	1
1	0	1	1	0	0	0	1	1	1
1	1	1	1	1	1	1	0	1	1
0	1	1	1	0	0	1	1	1	1
1	1	1	1	1	1	0	1	0	1
1	0	1	1	1	1	0	1	1	1
1	1	1	0	1	1	1	1	0	1
0	1	1	0	1	0	0	1	1	1
1	0	1	1	1	0	1	1	1	1
1	1	1	0	1	0	1	0	1	1
1	1	1	0	0	1	0	1	1	0
1	1	1	1	1	1	1	1	1	1
1	1	1	1	1	0	0	1	1	1
1	0	0	1	1	1	1	1	1	1
0	1	1	1	1	1	1	0	1	1
1	0	0	1	1	1	1	1	1	1
1	1	1	1	1	1	1	1	0	1
1	1	0	0	1	1	1	0	1	1
1	0	1	1	1	1	1	1	1	1
1	0	1	1	1	1	1	1	1	0
1	1	1	0	1	1	1	0	1	0
1	1	1	0	1	1	1	0	1	1
0	1	1	1	1	1	1	1	1	0
1	1	0	1	1	1	0	1	1	0
1	0	1	1	1	1	0	1	1	0
1	1	1	1	0	1	1	1	1	1
1	1	1	1	1	1	1	1	1	1
1	1	1	1	1	1	1	1	0	1
1	0	0	1	1	0	1	1	1	0
1	0	0	1	1	0	1	1	1	1
1	1	0	1	1	0	0	1	1	1
1	1	1	0	1	1	1	1	1	1
1	0	1	0	1	1	1	1	0	1
1	1	0	1	1	1	0	1	1	1
1	1	1	1	0	1	1	0	1	1
1	1	1	0	1	1	0	1	1	1
1	0	0	1	1	1	1	1	1	1
1	1	0	1	1	1	1	1	1	1
1	1	0	1	1	1	1	1	0	1
1	1	1	0	1	1	1	1	1	0
1	1	0	1	1	1	1	1	1	1
0	0	0	1	1	0	0	0	1	1
1	0	1	1	1	1	1	1	1	1
1	1	1	1	1	1	1	1	1	1
1	0	0	1	1	1	1	1	1	0
1	1	1	1	1	0	0	1	1	0
1	1	0	0	1	0	1	1	1	1
1	1	1	1	1	1	0	1	1	1
1	1	0	1	1	1	1	1	1	1
0	0	1	1	1	1	1	1	1	1
1	1	1	1	1	1	1	1	1	1
1	1	0	1	1	1	1	1	0	1
1	0	1	0	1	1	1	1	1	0
1	1	1	1	1	1	1	1	1	1
1	0	0	1	1	1	0	1	1	1
1	1	1	0	1	1	1	1	1	1
1	1	1	1	1	1	1	1	1	0
1	1	1	1	1	1	0	1	1	1
0	0	0	1	1	1	1	0	1	0
1	0	0	1	1	1	1	0	1	0
1	0	1	1	1	0	1	0	1	1
1	1	1	0	1	1	0	1	1	0
1	1	1	1	1	1	1	1	1	1
1	1	1	1	1	0	1	1	1	1
1	1	1	1	1	0	1	1	1	1
1	1	1	1	1	1	1	1	0	1
0	0	0	1	0	1	0	1	1	1

## Sheet: qlearn
0	1	1	0	0	0	1	0	1	0
1	1	0	1	0	0	0	0	1	0
0	0	0	1	0	0	0	0	0	1
1	1	1	1	0	1	0	0	0	0
0	0	0	1	0	1	1	1	1	1
1	1	1	0	0	1	0	1	0	1
1	0	0	0	1	0	1	0	0	0
1	0	0	0	0	1	0	1	1	0
1	1	0	0	1	1	1	0	1	1
0	0	1	0	0	0	0	0	0	0
1	0	0	1	0	1	0	0	0	0
1	0	0	0	0	0	0	1	1	0
0	1	0	0	1	1	0	1	1	1
1	1	1	0	1	1	1	1	0	1
1	0	1	0	1	1	0	1	0	0
1	0	0	0	0	0	0	0	0	1
0	1	0	0	1	0	0	1	1	0
1	1	1	0	0	1	1	1	0	0
0	0	0	0	0	0	1	0	0	0
0	0	1	0	1	0	0	1	1	1
0	0	0	0	0	1	1	1	1	0
1	0	1	0	0	0	0	1	1	0
0	1	0	1	1	0	0	0	1	0
1	1	0	1	0	1	0	1	0	0
1	0	0	0	0	0	1	1	0	0
0	0	1	0	1	0	0	1	1	1
0	0	1	0	1	0	1	1	0	0
0	1	1	1	0	1	0	0	1	0
0	0	1	0	1	0	1	0	0	0
1	0	1	0	0	1	0	0	0	1
0	0	1	1	1	0	1	0	1	0
0	1	1	0	0	0	1	0	1	0
0	0	0	1	0	0	0	0	1	1
1	1	1	0	1	1	1	0	0	1
0	1	0	0	0	0	1	1	0	0
0	0	1	0	0	1	0	0	0	1
1	1	1	0	0	0	0	1	0	0
0	1	0	0	0	0	1	1	1	0
1	0	0	0	0	0	0	1	0	0
1	0	0	0	1	1	0	0	0	1
0	0	0	1	0	1	1	0	0	1
1	0	1	1	0	0	0	1	0	0
0	0	0	1	0	0	1	0	0	1
1	0	0	0	1	0	0	1	0	1
1	1	0	0	1	1	1	1	0	0
0	0	0	0	1	0	1	0	0	1
0	1	1	1	0	1	0	0	0	0
0	0	1	1	0	1	0	0	1	1
0	1	0	0	0	0	1	1	0	0
1	0	1	0	0	1	0	1	1	0
0	0	1	0	0	0	0	0	1	0
0	1	1	0	0	1	0	1	1	1
1	1	1	1	1	1	1	1	1	1
0	1	0	0	1	1	1	1	0	0
0	0	1	0	1	1	1	0	0	1
1	1	0	1	0	0	0	0	0	1
0	0	0	0	0	0	0	1	0	0
1	0	1	0	0	0	0	0	0	1
1	0	0	0	0	1	0	1	1	1
1	1	0	0	1	1	0	1	0	0
0	1	0	0	0	1	1	1	0	1
0	0	0	0	0	0	0	0	1	0
1	1	1	0	0	0	0	0	1	1
1	0	1	1	1	1	0	0	0	0
0	0	0	0	0	1	0	1	0	1
1	1	0	0	1	0	1	0	0	0
1	1	0	0	1	0	1	0	0	0
0	0	0	0	0	0	1	0	0	0
1	0	0	1	1	0	1	0	1	0
1	1	0	0	1	0	1	1	0	1
0	0	0	1	1	1	1	0	0	0
1	0	1	0	0	0	0	1	0	0
1	0	0	0	0	0	0	0	0	0
1	1	1	1	0	1	1	1	0	0
1	0	1	0	1	0	0	0	1	1
1	1	1	1	1	1	1	1	1	0
0	1	1	0	0	0	1	1	0	1
1	0	0	0	0	1	1	0	0	0
0	1	0	0	1	1	1	1	1	0
0	1	1	0	1	0	1	0	1	0
0	1	1	0	0	0	0	0	1	0
1	0	0	0	0	1	0	0	0	1
0	0	0	0	0	0	0	0	0	0
1	0	0	1	0	1	1	1	0	0
0	0	1	1	0	1	1	0	1	1
1	1	1	1	0	1	1	0	1	1
0	1	1	1	0	0	1	1	1	0
1	1	1	1	0	0	1	0	1	0
0	1	0	0	1	1	0	0	1	0
0	0	0	0	0	1	1	0	1	1
1	0	1	1	0	0	0	1	0	0
0	1	0	0	0	0	1	0	0	1
1	0	1	0	1	0	1	0	1	0
0	0	1	1	0	0	0	1	1	1
0	0	1	0	0	0	0	1	0	1
1	1	1	0	0	1	0	1	0	0
0	1	0	0	0	0	0	1	0	0
1	0	0	1	0	0	1	1	1	0
1	0	0	0	1	1	0	1	1	1
1	1	1	0	1	1	0	0	0	0
0	1	1	0	0	1	0	1	1	1
0	0	1	1	1	0	0	0	0	1
0	1	0	0	0	0	1	0	0	1
0	0	1	1	1	0	1	0	0	1
0	0	1	1	1	0	1	0	0	1
0	0	1	1	1	0	0	1	1	0
0	1	1	1	0	0	0	0	1	1
1	0	0	1	1	0	1	0	0	0
0	0	1	0	1	1	0	1	1	0
0	1	1	0	1	1	0	0	0	0
0	0	0	0	1	1	1	1	0	1
1	0	0	1	1	1	1	1	0	1
1	1	1	1	1	0	1	0	1	0
1	1	1	0	1	1	0	1	1	1
0	0	1	0	0	0	0	1	0	1
1	0	0	0	1	0	0	1	1	1
0	0	1	0	1	1	1	0	1	1
1	0	1	1	0	0	1	0	1	0
0	0	1	0	1	0	0	0	1	1
0	0	1	1	0	0	1	0	1	0
0	0	1	0	1	0	0	0	0	1
0	1	0	1	0	1	0	1	0	1
0	1	0	1	0	1	1	1	0	1
0	0	0	1	1	1	0	0	0	0
1	1	0	0	0	0	1	0	0	1
0	0	1	1	0	0	0	1	0	0
0	0	0	1	0	0	1	0	0	0
0	1	1	0	0	1	0	1	1	1
0	0	1	0	0	0	1	0	0	1
0	0	0	0	0	1	0	0	1	1
0	0	0	0	0	1	0	1	0	0
0	0	1	0	1	0	1	0	1	1
1	1	0	1	0	0	0	0	0	0
1	1	0	1	1	0	0	0	0	1
0	0	0	0	0	1	1	1	0	0
1	1	1	0	1	1	1	1	1	0
1	1	0	0	0	0	0	1	0	1
1	0	1	0	0	1	0	0	1	1
1	1	1	1	0	0	1	1	0	0
0	1	0	1	0	1	0	0	0	0
0	0	0	0	1	1	0	1	1	1
1	0	0	0	1	0	1	0	1	0
1	0	1	1	1	1	1	1	0	0
1	1	1	1	0	0	0	0	0	1
1	0	0	1	0	1	0	0	0	1
0	0	0	0	1	1	1	0	1	0
1	0	1	1	1	1	1	1	1	1
0	0	0	0	0	0	0	1	1	0
0	0	0	0	0	1	1	1	0	0
1	1	0	0	1	0	0	1	1	0
0	0	0	1	1	0	0	0	0	0
1	1	0	0	0	1	1	0	0	0
0	0	0	1	1	0	0	1	0	1
0	1	0	0	1	0	0	0	1	1
0	0	1	0	1	0	0	1	1	0
0	0	0	0	1	0	0	1	0	1
1	1	0	1	0	1	1	1	0	0
1	0	1	0	1	1	1	0	0	1
0	1	1	0	0	1	1	0	1	0
0	0	1	0	1	1	0	1	0	0
1	0	0	1	1	1	0	1	0	0
1	1	0	1	0	1	0	1	0	1
0	0	1	0	1	1	0	1	1	1
0	1	1	0	1	0	1	1	1	1
0	1	0	1	1	1	0	1	1	1
1	1	0	0	0	0	0	0	1	0
1	1	0	1	1	1	0	0	1	0
1	1	1	0	1	0	1	0	0	1
0	1	1	1	0	1	0	1	1	0
1	0	1	0	0	0	1	0	0	1
0	0	0	0	1	1	1	1	1	0
0	0	0	0	1	0	1	1	1	0
1	1	1	0	0	0	1	0	0	0
1	0	0	0	1	0	0	1	1	0
0	0	1	0	0	0	1	0	1	1
1	1	0	0	0	1	1	1	0	0
1	0	1	1	0	0	0	0	1	0
1	1	1	1	0	0	1	0	0	0
0	1	0	1	0	0	0	1	0	1
0	1	1	1	0	0	1	0	0	0
1	1	0	1	1	0	0	1	0	0
0	0	0	0	0	0	0	1	1	0
0	0	0	0	1	1	1	0	1	0
1	0	0	1	0	0	0	0	0	1
0	0	1	0	0	0	1	0	0	0
1	1	1	1	0	1	0	1	1	1
1	0	0	0	1	1	1	1	0	1
0	0	1	0	0	0	1	1	1	0
1	0	1	0	0	0	1	0	1	0
1	1	0	1	0	0	0	0	0	1
0	0	0	0	0	0	0	1	1	0
1	0	1	1	1	0	1	0	0	0
1	1	0	0	0	1	1	0	0	1
1	1	0	0	0	1	0	0	0	1
0	0	1	0	0	1	0	0	0	0
1	0	0	0	0	0	1	1	0	0
1	1	1	1	0	1	1	0	0	1
0	0	1	1	1	1	1	1	1	1
0	0	1	0	0	1	1	1	1	0
0	0	1	0	1	0	1	1	1	1
0	1	0	0	0	0	0	1	0	1
0	0	0	0	0	1	0	0	0	0
0	1	1	1	1	1	0	1	0	0
1	1	1	0	1	0	1	0	0	1
0	1	0	0	0	1	1	1	1	1
1	1	0	0	0	0	0	1	1	1
1	1	1	0	1	1	1	1	0	0
1	0	0	0	0	0	1	0	1	1
1	1	0	0	0	0	0	0	0	1
1	0	0	0	1	1	0	0	0	0
1	0	0	0	0	1	0	0	1	1
0	1	1	0	1	1	1	0	1	1
0	0	0	1	1	1	1	0	0	1
0	0	0	0	0	1	1	0	1	0
0	0	0	1	1	0	1	0	1	0
1	0	1	1	1	1	1	1	0	1
1	1	1	1	0	0	0	0	0	1
1	1	1	0	1	1	1	1	0	1
0	1	0	1	1	1	1	0	1	1
0	0	0	0	1	1	0	0	0	0
1	0	0	0	0	0	0	1	1	1
0	0	0	0	0	0	1	1	1	0
0	0	0	0	0	0	0	1	1	1
1	1	1	1	1	0	1	1	0	1
0	1	1	1	1	0	1	1	1	1
0	1	0	1	1	1	0	1	1	1
0	0	0	1	1	0	0	1	1	0
0	0	1	0	1	1	0	0	0	0
1	0	0	1	0	0	0	0	1	0
1	0	1	0	1	1	1	1	1	1
0	0	0	0	0	1	1	0	0	0
0	0	1	0	1	0	0	0	1	0
1	1	0	0	0	1	0	1	1	1
0	0	1	0	0	1	0	1	0	0
0	1	1	0	1	0	0	0	0	0
1	0	1	0	0	1	0	1	1	1
0	1	0	1	0	0	1	0	0	0
1	0	0	1	1	1	0	0	1	1
0	1	0	0	1	0	0	0	0	1
0	1	1	1	1	0	0	0	1	0
0	0	1	0	0	1	0	0	0	1
1	1	1	0	0	0	1	0	0	0
1	0	0	1	0	1	0	1	0	0
0	1	0	0	0	0	0	0	0	0
1	1	1	0	0	1	1	1	1	1
1	0	1	1	0	1	0	0	0	1
0	0	1	0	0	0	0	0	0	1
0	0	0	0	1	1	0	1	1	0
0	0	0	0	0	1	0	0	1	1
0	0	0	1	0	1	0	1	0	0
0	1	0	0	1	1	1	1	0	1
1	1	1	0	0	0	0	0	0	1
0	0	1	0	0	1	1	1	0	0
0	1	1	1	0	1	0	0	0	0
1	0	1	0	0	0	0	1	0	0
0	1	1	0	0	1	1	0	1	1
0	0	0	0	0	1	1	1	0	1
0	1	1	1	0	1	1	0	0	1
0	0	0	0	1	1	1	0	1	0
1	1	1	1	1	0	0	1	1	0
1	1	1	0	1	0	1	0	0	1
0	0	0	1	0	0	1	0	1	0
1	0	0	1	0	0	1	0	0	1
1	0	1	0	0	0	1	0	0	1
1	0	0	0	0	0	0	0	0	1
0	0	0	0	0	0	1	1	0	1
0	0	1	0	0	0	0	1	1	1
0	1	0	1	0	1	1	1	0	0
1	1	0	0	1	0	1	0	1	0
1	1	0	0	0	0	0	1	1	0
1	1	1	1	0	0	0	0	0	1
0	0	0	0	0	1	1	1	0	0
1	0	1	0	0	1	0	0	1	0
0	0	1	0	0	0	0	0	0	1
0	1	1	0	0	0	0	1	0	0
0	1	1	0	0	1	0	0	1	1
1	0	0	0	1	0	1	1	1	0
1	1	1	0	0	0	0	1	1	1
0	1	1	1	0	1	1	0	1	0
1	0	0	1	0	0	1	0	0	1
1	1	1	0	0	0	1	1	0	1
0	1	1	0	1	1	1	0	1	0
1	0	1	1	0	0	1	0	0	0
1	1	0	0	0	0	1	1	0	0
0	1	0	0	1	0	0	0	0	0
0	0	1	1	0	1	0	0	1	0
1	0	0	0	0	0	0	0	0	0
1	0	0	1	0	1	0	1	0	0
1	0	0	0	0	0	1	1	0	0
1	1	1	0	0	1	0	1	0	0
1	1	0	1	0	0	0	1	0	0
1	1	1	1	0	1	1	0	0	0
0	0	1	1	1	0	0	1	1	0
1	0	0	0	1	1	1	0	0	1
0	1	0	0	0	0	0	0	0	0
0	0	0	1	1	1	0	0	0	0
1	0	0	1	0	0	1	1	1	1
0	0	0	0	1	1	0	0	0	1
0	0	0	0	1	1	1	1	0	1
1	1	0	0	1	1	1	0	1	1
0	0	1	0	0	1	0	0	1	1
1	1	1	1	0	0	0	0	0	0
1	1	1	0	1	1	1	0	0	0
0	1	0	1	0	0	0	1	0	0
1	0	0	0	0	0	0	0	0	0
0	1	0	1	0	0	0	0	1	1
0	1	1	0	1	1	1	1	0	0
1	0	1	0	0	0	0	1	1	0
0	1	0	0	0	0	0	1	0	0
1	0	0	1	1	1	1	1	1	0
1	0	0	0	1	1	0	1	0	1
1	1	1	0	0	0	0	0	0	0
1	0	1	1	0	1	1	0	1	1
0	0	0	1	1	1	0	1	0	1
0	1	0	1	0	0	0	0	0	1
0	1	0	1	0	1	0	0	1	0
0	1	1	0	1	1	1	0	1	1
0	1	0	1	0	0	0	0	0	1
0	1	0	0	1	0	0	0	0	0
0	0	1	1	0	0	1	0	1	0
1	1	1	0	1	1	0	1	0	0
0	0	0	1	1	1	1	1	1	0
1	1	0	0	0	1	1	0	1	1
0	0	0	1	0	1	0	1	1	1
1	0	1	0	1	0	1	1	0	1
0	0	0	0	0	1	1	1	0	1
1	1	0	0	1	0	1	0	0	1
0	1	0	0	1	1	0	1	0	1
1	1	1	0	1	0	1	1	0	1
0	1	0	0	0	0	0	1	0	1
1	0	1	1	0	0	0	1	1	1
1	0	0	1	1	0	0	1	0	0
1	1	1	0	0	0	1	0	0	0
1	0	0	1	1	0	0	0	0	0
1	1	0	0	1	0	1	1	0	0
1	0	1	1	0	0	0	1	0	0
1	1	0	1	0	0	0	1	0	0
1	0	0	1	0	0	1	1	1	0
1	0	0	1	1	0	1	1	1	0
0	1	1	0	0	1	1	0	1	1
1	0	0	0	0	1	0	1	0	1
1	1	0	0	0	0	1	1	0	1
1	0	0	0	1	0	0	1	1	1
0	0	1	0	0	0	1	0	1	1
0	1	0	0	1	1	1	1	1	0
0	0	0	0	0	0	0	1	1	0
0	0	0	0	0	1	0	1	1	1
1	0	0	1	0	1	1	0	1	1
0	0	0	0	1	0	1	0	0	0
0	1	0	1	1	0	1	1	1	0
1	0	1	1	0	0	1	0	1	1
0	0	1	0	0	1	0	1	0	0
0	0	1	0	1	1	1	0	1	1
1	1	0	1	1	1	0	0	1	0
0	0	0	0	1	0	1	1	1	0
0	0	0	0	1	0	0	0	0	1
0	0	1	0	1	0	0	0	0	0
1	0	0	0	0	1	1	1	1	0
1	1	1	0	0	1	0	0	0	0
1	1	0	1	1	0	0	1	1	1
0	1	0	1	1	1	0	1	1	0
1	0	1	0	0	0	1	0	1	0
0	1	1	0	0	1	0	0	0	1
0	0	0	1	1	1	0	1	0	1
0	1	0	1	1	0	0	0	1	0
1	1	0	0	1	1	0	0	1	1
1	1	1	0	0	0	0	1	0	1
1	1	0	1	1	0	0	1	0	0
1	0	0	1	1	1	0	1	0	0
1	0	1	0	1	1	1	1	0	0
1	1	0	0	1	0	1	0	1	0
1	1	0	0	0	1	0	1	0	0
0	0	0	0	1	1	1	1	1	1
0	1	0	1	1	1	0	0	0	1
0	1	1	1	1	0	0	1	0	0
0	1	1	1	1	1	0	0	0	0
1	1	1	0	1	1	0	0	0	0
0	0	0	0	1	0	1	0	1	1
0	0	0	1	1	0	1	0	1	0
1	1	0	0	0	0	1	0	0	0
1	0	0	1	1	1	0	1	1	0
0	1	0	0	0	0	0	0	0	0
0	1	0	1	1	0	0	1	0	1
1	0	1	0	1	1	1	1	0	0
0	0	0	1	0	0	0	1	0	1
1	0	0	0	1	0	0	0	1	0
1	1	1	1	0	0	0	1	1	1
1	0	1	1	1	1	0	1	1	0
1	1	1	1	1	1	1	0	0	0
1	1	0	0	1	0	0	1	1	1
0	1	0	1	0	1	0	1	1	0
0	0	0	0	1	0	1	1	0	0
0	1	1	1	0	1	1	0	0	0
1	1	1	0	0	1	0	0	0	0
0	1	1	0	1	1	1	1	1	0
0	1	1	1	1	1	0	1	0	1
1	0	0	1	1	1	0	1	0	1
1	0	0	1	0	0	0	1	0	0
1	1	0	1	1	1	1	1	0	0
1	1	0	0	0	1	0	0	1	0
1	0	1	1	1	0	0	1	0	0
0	0	0	0	0	1	1	1	1	0
0	0	1	0	0	0	0	1	0	0
0	0	1	1	0	0	1	1	0	1
1	0	0	0	1	0	0	1	0	1
1	0	1	1	0	1	1	1	0	0
1	1	1	0	1	1	0	1	1	0
0	1	1	1	1	1	1	1	0	1
1	0	1	1	0	1	0	1	1	0
0	1	0	1	1	0	0	1	1	1
1	0	1	0	1	0	1	1	1	1
0	0	1	0	1	1	0	1	1	1
1	1	1	1	0	1	1	0	1	1
0	1	1	1	0	0	0	0	1	1
0	1	0	0	1	0	0	1	1	0
1	0	1	1	1	0	1	1	1	0
1	0	0	1	0	1	1	0	1	1
1	0	0	0	1	0	0	1	1	0
1	0	1	0	0	0	1	1	1	1
1	1	1	0	1	1	0	0	1	1
0	1	0	1	0	1	0	1	0	1
0	0	0	1	1	0	0	0	0	0
0	0	1	0	0	1	0	1	1	1
1	0	0	0	1	1	1	1	0	1
1	0	1	1	1	0	1	0	1	0
1	1	1	0	1	1	1	1	0	0
0	0	0	0	1	1	1	0	1	1
1	1	1	1	1	1	0	1	0	1
1	0	0	1	0	1	1	0	1	1
1	0	0	0	0	0	0	0	0	0
0	1	0	1	0	1	1	0	0	0
1	1	1	1	1	0	0	0	1	1
0	1	1	0	1	0	0	0	0	0
1	0	1	0	0	1	1	0	0	1
1	1	1	0	1	0	1	0	1	1
1	0	0	1	1	1	0	1	0	1
0	1	1	0	1	1	1	1	1	0
0	0	0	1	0	0	0	0	1	1
1	1	1	1	0	0	0	1	0	1
1	1	0	0	1	0	0	0	0	0
1	1	1	0	0	1	1	1	1	1
1	0	0	1	1	0	1	1	0	0
0	1	0	0	0	1	1	1	1	0
1	1	0	1	0	0	0	1	1	0
0	1	0	1	0	0	1	0	1	0
0	0	1	1	0	1	1	0	0	0
0	0	0	0	0	0	1	0	1	0
1	1	1	0	0	0	1	0	1	0
1	0	1	1	1	0	1	1	0	0
0	1	0	1	0	0	1	0	1	0
1	0	0	1	1	1	1	0	1	1
0	1	0	1	1	1	1	0	0	1
0	1	0	1	1	1	1	0	0	0
1	1	1	0	1	1	0	1	0	1
0	0	0	0	1	1	1	1	1	1
1	1	0	1	0	0	1	1	1	1
0	1	0	0	1	0	0	1	0	1
1	1	1	0	0	1	1	1	0	1
0	1	1	0	0	1	1	1	0	0
0	1	1	0	0	0	1	0	1	1
0	1	0	1	1	0	0	0	1	0
1	0	0	0	0	0	1	1	0	0
1	1	0	1	1	0	1	0	1	0
1	0	0	0	1	1	1	0	1	1
0	0	1	1	1	0	0	0	1	1
1	1	0	0	0	1	0	1	1	1
0	0	0	1	0	0	0	0	0	1
0	0	0	0	1	0	0	0	1	1
0	1	1	1	1	0	1	0	0	0
1	1	0	1	1	0	1	0	0	1
1	0	1	0	0	1	0	0	1	0
1	1	0	0	0	1	1	0	1	1
0	0	0	1	1	0	1	0	0	0
0	0	1	0	0	0	0	1	0	0
1	0	0	0	1	0	0	0	1	1
1	0	0	1	1	1	0	1	1	1
0	1	0	1	0	0	1	1	1	1
0	0	0	1	0	1	1	0	1	1
0	0	0	0	0	0	1	1	0	0
0	0	0	1	0	0	1	0	0	1
1	1	1	1	0	1	0	0	1	0
0	0	0	0	1	0	1	1	1	1
1	0	1	1	0	0	0	1	0	1
0	1	1	0	1	0	1	0	1	1
0	1	1	1	1	0	0	0	0	0
0	0	1	0	1	1	0	0	0	1
1	1	0	1	1	0	1	0	1	1
0	0	0	1	0	0	0	1	1	0
0	1	1	0	1	0	0	1	1	0
1	1	0	1	1	0	1	1	1	0
0	0	1	1	1	0	0	0	0	1
1	0	0	0	1	0	1	0	1	0
1	1	0	1	1	1	1	1	1	1
0	1	1	0	0	1	0	0	1	1
0	0	1	1	1	0	0	0	0	1
0	1	1	1	0	1	0	1	0	0
1	1	0	1	1	1	1	0	1	1
0	0	0	0	1	0	1	0	1	0
0	1	0	1	0	1	0	0	1	1
0	0	1	0	1	0	0	0	1	1
0	1	0	0	1	0	1	1	0	0
1	0	1	1	0	1	0	0	1	1
0	1	1	0	0	1	1	0	1	0
1	0	1	0	1	0	1	0	0	1
1	1	0	1	0	1	1	1	0	1
1	0	0	1	0	0	1	0	1	1
1	1	1	0	0	1	0	0	1	1
1	1	0	0	1	0	0	1	0	1
0	0	1	0	0	0	0	0	0	0
1	0	1	0	0	1	0	1	1	0
1	0	1	0	0	1	0	1	0	1
0	0	0	1	0	0	1	1	0	0
0	1	1	1	0	1	0	1	1	1
0	0	0	1	0	1	1	0	0	1
1	1	0	0	0	0	0	0	0	0
1	0	0	0	1	1	1	1	0	0
0	0	0	1	0	0	0	0	1	0
1	1	0	1	0	1	1	0	0	0
0	1	0	0	0	1	0	1	1	1
0	1	0	0	1	1	0	1	1	1
0	1	1	0	0	0	0	1	1	0
1	0	0	1	1	1	0	0	1	1
0	0	1	1	0	0	1	0	0	1
0	0	1	1	1	1	1	1	0	0
0	1	0	1	0	1	0	1	1	1
1	1	1	0	1	0	1	1	1	1
0	0	1	1	1	0	0	0	0	1
0	1	0	0	0	0	1	0	1	0
0	1	0	1	1	1	1	1	0	0
0	0	0	0	1	0	0	1	1	1
1	1	0	1	0	1	1	1	0	0
1	1	1	0	1	1	1	0	1	0
1	1	1	1	0	1	0	1	1	0
1	1	1	0	1	0	1	0	0	1
1	1	0	0	0	1	0	1	0	1
0	0	1	0	1	1	0	0	0	1
0	0	1	0	1	1	0	1	0	1
1	0	0	1	1	1	1	0	0	1
1	0	1	1	0	1	1	1	1	0
0	0	0	1	1	0	1	0	1	1
1	1	1	1	1	0	1	0	1	1
1	1	0	1	0	1	0	0	1	0
0	0	0	0	1	0	0	0	1	1
1	0	0	1	0	1	1	1	0	0
1	1	1	0	0	1	1	1	1	1
0	1	0	0	0	0	1	1	0	0
1	1	0	0	0	0	1	1	0	1
0	1	1	0	0	0	1	1	0	0
1	1	0	1	1	0	0	0	1	1
0	1	1	0	1	0	1	1	1	1
0	1	1	0	0	0	1	0	0	0
1	0	0	1	0	0	0	1	1	1
0	0	1	1	0	0	1	0	1	1
1	0	0	1	0	0	1	1	1	0
0	0	1	1	0	0	1	1	1	1
0	0	1	1	0	0	1	1	1	1
1	1	1	0	0	1	1	0	1	0
0	1	1	0	1	1	1	1	0	0
1	1	1	1	0	0	0	0	1	1
0	0	0	0	1	0	1	0	1	0
0	0	0	0	0	0	1	0	1	0
1	0	0	0	1	0	1	0	1	0
0	0	1	0	1	0	1	0	0	1
1	1	0	0	0	0	1	1	1	1
0	1	0	0	0	0	1	1	1	0
1	0	0	1	1	0	0	1	1	0
0	1	1	0	1	1	1	0	0	1
1	1	1	0	1	1	0	0	0	1
0	1	0	1	1	0	1	0	1	0
1	0	1	1	1	1	1	0	0	1
1	1	0	1	1	0	1	0	1	1
0	0	0	0	1	0	0	1	0	0
0	0	0	0	0	1	1	0	0	1
0	1	0	1	1	0	1	0	1	1
1	0	0	0	0	0	1	0	1	1
1	1	0	1	0	0	0	0	1	1
0	1	1	1	0	0	0	0	1	1
0	1	1	1	0	0	0	0	0	0
1	1	0	0	0	1	1	0	1	0
1	1	0	1	1	1	1	0	0	1
1	1	1	0	0	0	0	1	1	0
1	0	0	1	0	1	0	0	1	0
1	0	0	1	1	0	0	0	1	1
1	0	0	1	1	0	0	0	0	1
1	0	0	1	1	1	0	1	1	0
0	0	1	1	1	0	1	0	0	0
0	0	0	0	1	1	1	0	1	1
0	1	0	1	0	0	1	0	0	1
0	0	0	0	0	1	0	0	1	0
1	0	1	0	1	0	0	0	0	0
0	0	1	1	0	1	1	1	0	0
1	0	1	1	1	0	0	1	0	1
1	0	0	1	1	0	0	0	0	1
1	0	0	0	1	0	0	0	1	1
1	1	1	1	1	1	0	1	1	1
1	0	0	1	1	1	1	1	1	1
1	1	1	1	1	0	0	0	1	1
1	0	0	1	0	1	1	1	0	0
0	1	0	0	1	0	0	0	0	1
1	0	0	1	0	0	0	0	0	0
0	0	0	0	0	1	1	1	1	1
0	0	1	0	0	0	1	0	1	1
0	0	1	0	0	1	1	1	0	1
1	1	1	1	0	1	1	0	0	0
1	1	0	0	1	0	1	0	1	1
1	0	0	0	1	1	0	1	0	1
0	1	0	0	1	1	0	1	1	0
0	0	1	0	1	1	0	1	1	0
0	0	0	1	1	0	1	0	0	1
0	0	1	0	1	1	1	1	0	1
1	1	0	1	1	1	0	0	0	0
1	1	1	0	0	1	1	1	0	0
1	0	1	0	1	1	0	0	0	1
1	0	1	0	0	0	1	0	1	1
0	0	0	1	1	1	1	0	0	0
0	1	0	1	0	1	1	0	1	0
1	1	0	1	0	0	1	1	0	0
1	0	0	0	0	1	0	1	0	1
1	0	0	1	1	1	0	0	1	1
1	1	0	1	1	0	0	0	1	0
1	0	0	1	0	0	0	1	1	0
1	1	1	0	0	1	0	0	0	0
1	1	1	1	1	1	1	1	1	0
1	0	1	1	1	1	1	0	0	1
1	1	1	1	0	1	0	1	0	1
0	0	0	1	1	1	1	0	1	0
0	0	1	0	0	0	1	1	1	1
0	1	1	1	1	1	0	0	1	1
0	0	1	1	0	0	0	1	0	0
1	0	1	0	0	0	1	0	0	1
0	0	1	0	1	0	1	0	1	1
1	1	0	1	1	0	0	0	0	1
1	1	1	1	1	0	1	1	0	1
1	0	1	1	1	1	0	0	1	1
0	0	1	1	0	1	0	1	0	1
1	1	1	0	1	0	1	0	0	0
1	0	0	0	1	1	1	0	0	0
1	1	0	0	1	1	0	1	0	0
0	0	1	1	0	0	0	1	0	1
0	1	1	1	1	0	0	0	0	0
1	0	0	1	0	1	1	0	1	0
0	0	0	0	0	1	0	1	1	0
1	1	0	1	1	1	0	1	0	1
0	0	1	1	0	0	0	1	0	0
0	1	0	0	1	1	0	0	0	1
0	0	1	0	0	1	0	1	0	1
1	0	1	0	0	1	0	0	0	1
1	1	1	1	1	1	0	1	0	1
1	1	0	1	0	1	1	1	0	1
0	0	1	1	1	1	1	0	1	0
1	1	0	1	0	0	1	0	0	0
1	1	1	0	0	0	1	0	1	1
0	1	0	0	1	1	0	1	1	1
1	1	0	1	0	1	1	1	1	1
0	0	0	0	0	1	0	1	0	1
1	1	1	0	1	0	0	1	1	1
1	1	1	1	1	0	1	1	1	0
0	0	1	0	0	1	0	0	1	0
0	0	0	1	0	1	1	1	0	0
1	1	0	1	1	1	0	0	1	0
0	1	0	0	0	1	0	1	1	0
0	1	1	0	0	1	1	1	1	1
0	0	1	0	0	0	1	0	0	0
0	1	0	0	1	1	1	0	0	0
1	1	0	0	0	1	0	0	1	0
0	0	1	0	0	1	0	0	1	1
1	1	0	0	0	1	1	0	0	0
1	0	1	1	0	1	0	1	1	0
1	1	0	0	1	0	0	1	0	1
0	1	1	1	0	0	1	1	0	1
1	0	1	0	0	0	1	1	1	1
0	0	1	1	0	0	0	1	0	0
0	0	1	0	1	0	0	1	0	1
1	1	0	0	0	1	0	1	1	0
1	1	0	0	0	1	0	0	1	1
1	1	0	0	0	0	1	0	0	0
1	1	1	0	0	1	1	0	0	0
0	1	0	0	0	1	1	0	0	0
1	0	1	0	1	1	0	0	1	0
0	1	0	0	1	0	0	1	0	1
1	0	1	0	0	1	1	1	0	0
0	0	1	0	0	1	1	1	1	0
0	0	0	0	1	0	0	0	0	0
0	0	0	1	1	0	0	1	0	0
0	0	1	0	0	0	0	1	0	1
0	0	0	0	0	1	1	1	0	1
0	1	1	1	0	0	0	1	0	0
0	1	0	1	1	1	1	1	1	1
1	1	0	0	1	0	0	1	1	0
1	0	1	0	0	1	0	1	1	1
0	0	1	0	1	1	0	1	0	0
1	1	0	0	1	1	0	0	0	1
1	0	1	1	0	1	1	0	0	1
0	1	0	1	1	0	0	0	1	1
1	1	1	1	0	0	1	0	1	0
1	1	1	1	0	1	1	0	0	0
1	1	1	1	0	0	0	1	0	0
1	0	0	1	0	0	1	1	1	1
1	1	0	1	0	1	1	0	1	1
1	1	0	0	0	1	0	0	0	1
0	1	0	1	0	0	0	0	1	1
1	0	0	0	1	0	1	0	1	1
1	1	0	1	0	1	1	0	0	1
0	1	1	0	1	0	0	1	1	0
0	0	0	1	1	1	0	0	1	0
0	0	0	0	0	1	0	1	0	0
1	1	1	1	1	1	0	1	0	0
0	0	0	1	1	1	1	0	0	0
1	0	0	1	1	0	1	0	0	1
1	1	1	1	1	1	0	0	1	0
0	0	1	0	1	0	0	0	0	0
0	0	0	1	0	0	1	1	1	1
1	0	1	0	1	0	0	0	1	0
1	1	1	0	1	0	0	1	0	0
0	0	1	1	1	0	1	1	1	1
0	0	0	0	1	1	0	0	0	1
0	1	0	0	1	0	0	1	1	1
0	1	0	1	1	0	1	1	1	0
0	0	0	1	1	1	0	0	1	0
1	1	1	1	1	1	1	0	0	1
1	1	1	0	1	1	1	1	0	1
0	0	0	0	0	1	1	1	0	1
0	1	1	0	0	0	1	0	0	1
0	0	1	0	0	0	0	0	1	1
1	0	0	1	1	0	1	0	0	1
0	0	1	1	1	1	1	1	1	0
1	0	0	1	1	1	1	1	1	0
1	1	1	1	1	0	1	0	0	1
1	1	1	1	1	1	0	0	0	0
1	0	1	1	0	0	1	1	0	0
0	1	1	0	1	1	1	1	0	0
1	0	1	0	0	0	0	1	0	0
1	1	1	1	0	1	1	0	1	0
1	1	1	0	1	1	0	1	1	1
0	0	1	1	0	1	1	0	1	1
0	0	0	1	1	0	0	1	1	1
1	0	1	1	0	1	1	0	0	0
1	0	0	1	0	1	1	0	0	1
0	1	1	0	1	1	0	0	1	0
1	0	0	0	1	0	1	1	1	1
1	1	0	1	1	0	1	0	0	1
0	0	0	1	0	0	0	0	0	0
0	1	0	0	0	1	1	1	1	1
1	1	0	0	0	0	1	1	1	0
0	1	1	0	0	0	1	1	0	1
1	1	1	0	0	0	0	1	0	1
0	1	1	0	1	0	1	0	0	0
1	1	0	1	1	0	1	1	0	1
0	0	1	0	0	1	1	1	0	0
1	1	1	0	0	0	1	0	1	0
0	0	1	1	1	1	1	0	1	1
0	1	0	1	1	0	0	1	0	1
1	1	1	1	0	1	1	1	0	0
1	1	1	0	1	1	1	1	1	1
1	1	1	1	1	1	0	0	1	1
1	0	1	0	1	1	0	1	0	0
1	0	0	0	1	1	0	1	0	1
0	0	0	0	1	0	0	1	1	0
0	1	0	1	0	0	0	0	0	1
0	0	1	0	0	1	0	1	1	1
1	0	1	0	1	0	0	1	0	1
1	0	1	0	1	0	0	1	1	0
1	0	0	0	0	0	1	0	0	0
1	0	1	0	0	0	1	1	0	1
1	0	1	0	0	0	0	1	0	0
0	1	0	1	0	1	0	0	1	0
1	1	0	1	1	0	0	1	1	1
1	1	1	0	1	1	1	1	1	0
0	0	1	0	0	0	1	0	0	0
1	0	0	0	1	1	0	1	0	0
1	0	0	1	0	0	1	0	0	0
0	0	1	0	1	1	1	1	1	1
1	1	1	1	1	1	0	0	0	0
0	1	0	1	0	1	0	1	1	1
1	0	1	1	1	1	1	0	0	0
1	1	0	0	1	0	1	0	0	1
1	0	1	1	0	0	0	1	1	0
1	0	1	0	0	0	0	1	1	0
0	0	0	0	0	1	1	1	0	1
1	1	0	1	0	1	0	1	1	1
0	1	1	0	1	0	0	1	1	1
1	1	1	0	1	0	0	0	1	1
0	1	0	0	0	0	0	0	1	0
0	1	1	0	1	1	0	1	1	1
1	0	0	0	1	1	1	0	1	0
1	1	1	0	1	0	0	1	1	0
0	0	1	0	1	0	1	1	1	0
1	0	1	1	1	0	0	1	1	1
1	1	0	1	0	1	1	1	0	1
1	1	1	0	1	1	1	0	0	1
1	0	0	0	0	0	1	0	0	1
0	0	0	1	1	1	1	1	1	1
0	0	1	0	1	0	1	1	1	1
0	1	0	1	1	0	1	1	0	1
1	0	1	1	1	1	0	1	1	0
0	0	1	0	0	0	1	0	0	1
0	0	1	0	0	0	1	1	1	0
1	0	1	0	1	0	1	0	1	1
1	0	1	1	0	0	0	0	1	0
0	0	1	1	0	0	0	1	1	0
1	1	0	1	1	1	0	0	1	0
1	0	1	0	0	1	0	1	1	1
1	1	1	0	0	1	0	1	1	0
1	1	1	1	1	1	0	0	0	1
0	1	1	0	1	1	1	0	0	0
1	0	1	1	0	0	1	1	0	1
1	1	1	0	1	1	1	1	0	1
0	0	0	0	0	0	0	0	0	0
0	0	1	1	0	0	0	0	0	1
1	0	0	1	0	0	0	0	1	0
1	1	1	0	1	1	0	0	1	0
0	1	1	0	1	1	1	0	1	0
0	0	1	1	0	1	0	1	0	1
1	0	0	0	0	0	1	0	0	1
0	0	0	1	0	1	1	1	1	0
1	1	0	0	0	0	0	0	0	0
0	0	1	0	1	0	1	1	1	1
1	0	0	0	1	0	1	0	0	1
1	0	1	1	1	0	1	1	0	0
0	0	0	0	0	1	1	1	0	1
0	0	0	1	1	1	1	1	0	1
1	1	0	1	1	0	0	1	0	0
0	0	0	0	1	0	0	0	1	1
1	0	0	0	0	1	0	1	0	1
1	1	1	0	1	1	1	0	0	1
0	1	1	0	1	0	0	1	0	0
1	1	0	0	0	1	1	1	0	1
1	1	0	1	1	0	1	0	0	1
1	0	0	0	0	1	0	1	1	1
0	0	0	0	1	0	0	0	1	0
1	1	1	0	0	0	1	1	0	1
0	0	1	0	1	0	0	1	1	0
1	1	1	0	1	0	0	0	0	0
1	1	1	1	1	1	1	1	0	0
1	1	1	0	1	0	1	1	1	1
0	0	1	0	0	1	0	1	1	1
0	1	0	0	1	1	1	1	1	1
0	1	1	0	0	1	1	0	1	1
1	0	1	0	0	0	0	1	0	0
1	1	1	1	0	0	0	1	1	1
1	0	1	1	0	0	0	0	1	0
0	0	1	0	1	1	1	0	1	0
1	0	1	0	0	1	0	0	0	0
1	0	1	0	0	1	0	1	0	1
0	1	0	0	0	0	1	0	0	1
1	1	0	0	1	1	1	1	0	1
1	0	0	0	0	1	0	0	1	0
0	0	0	0	0	1	1	0	0	1
1	1	1	0	0	0	1	1	1	0
1	1	1	0	1	0	0	1	1	0
1	0	1	0	1	1	1	1	0	0
0	0	1	0	1	0	0	0	0	1
1	0	1	0	1	1	1	1	1	1
1	0	0	1	0	0	1	0	0	0
0	1	0	1	1	1	1	1	0	1
1	1	0	0	1	1	1	1	0	0
1	1	0	0	0	1	1	0	0	0
0	0	1	1	1	1	1	1	1	1
0	0	1	1	0	0	1	0	1	1
0	0	0	1	0	0	1	1	1	0
1	0	1	1	1	0	0	0	1	1
1	0	0	0	0	1	0	0	1	1
0	1	0	0	0	0	1	0	1	0
0	0	1	0	1	1	1	0	0	1
0	0	1	0	0	1	1	0	0	1
1	0	0	1	0	0	1	0	0	1
0	1	0	0	1	0	0	0	1	0
0	1	1	1	0	1	0	0	1	0
1	0	0	1	0	0	0	1	1	1
1	1	1	1	0	1	1	0	0	1
1	0	0	0	1	0	0	1	1	0
1	0	1	1	0	0	1	1	1	1
0	0	1	0	0	0	1	0	0	1
1	1	0	0	1	1	0	1	0	0
1	0	1	1	1	0	0	0	1	0
0	0	1	1	0	1	0	0	1	0
0	0	0	1	1	0	0	0	0	1
0	1	1	0	0	1	0	0	0	1
1	0	1	1	1	1	0	0	1	0
1	1	0	0	1	0	0	1	0	1
0	0	1	1	0	0	1	1	1	0
0	0	0	0	0	0	1	0	0	1
1	0	0	1	0	0	1	0	0	0
1	1	0	0	1	0	1	1	0	0
1	0	0	0	0	1	0	0	0	1
0	0	0	0	1	1	0	0	0	0
1	0	0	0	0	0	0	1	0	1
0	0	1	1	0	1	0	1	0	0
0	1	0	1	1	1	0	1	1	1
0	0	0	1	0	0	1	0	1	0
0	0	0	0	1	0	0	1	1	0
1	1	0	1	1	0	0	0	0	1
1	0	0	0	1	1	1	0	1	1
0	0	1	1	1	1	0	0	1	1
1	0	1	0	1	0	1	1	1	1
0	1	0	1	0	0	1	1	1	0
1	0	1	1	0	1	0	1	1	0
0	0	0	1	1	0	0	1	1	1
0	1	1	1	0	0	0	1	0	0
0	0	0	0	0	0	0	0	1	1
0	1	1	1	1	0	1	1	0	1
0	1	0	1	1	0	1	1	0	0
0	1	1	0	1	1	0	1	1	1
0	0	0	0	0	0	1	1	0	1
1	1	0	0	0	1	0	1	1	1
0	1	1	1	0	1	1	1	1	1
0	1	1	0	1	0	0	1	0	0
0	0	0	0	1	0	1	1	0	1
1	0	0	1	1	1	1	1	1	1
1	0	0	1	0	1	0	1	0	0
1	0	0	1	0	0	1	0	0	1
0	0	1	0	0	0	1	1	1	1
0	1	1	0	0	1	0	0	1	1
1	1	1	0	0	1	1	1	0	1
0	1	1	0	0	0	0	1	1	1
1	1	0	0	0	0	1	0	1	1
1	1	1	1	1	0	0	0	1	0
1	0	1	1	1	0	0	1	0	1
0	0	1	1	1	0	1	1	0	1
0	0	0	0	0	1	0	0	0	1
0	1	0	1	1	0	0	1	1	1
1	1	1	1	1	0	1	1	1	0
0	0	0	1	1	0	1	1	0	0
0	0	0	1	0	0	0	1	1	0
1	1	1	0	1	1	0	1	0	1
0	0	0	0	1	0	0	0	1	1
0	0	0	0	1	0	0	1	1	0
0	1	0	1	1	0	0	1	1	0
0	1	0	1	0	1	0	1	1	0
0	0	1	1	1	1	1	0	0	1
0	0	0	1	0	0	1	0	1	0
1	1	1	1	1	0	0	1	0	0
0	1	0	1	1	1	0	0	1	0
0	1	0	0	0	1	1	0	1	1
1	1	0	1	0	1	0	0	1	1
1	0	0	0	0	0	1	0	1	0
0	0	0	0	0	1	1	1	0	0
1	1	0	1	1	0	1	0	1	0
1	1	0	0	1	1	0	1	0	1
1	0	0	0	1	1	1	0	1	1
1	0	1	1	1	1	1	0	1	1
0	0	0	0	0	1	1	1	0	1
0	0	0	0	0	1	0	1	1	1
1	1	1	1	1	0	0	1	0	1
1	0	0	1	1	0	1	0	1	0
1	0	0	0	0	1	1	0	0	0
0	1	0	0	1	1	1	0	0	0
1	1	1	0	1	0	0	0	1	0
1	0	0	1	1	1	0	0	1	1
1	1	0	1	1	0	0	1	1	0
0	1	1	0	1	1	0	1	0	1
0	1	0	1	0	1	1	0	0	0
1	1	0	1	1	0	1	1	0	1
0	0	0	1	0	0	1	1	1	1
0	1	1	1	0	1	0	0	0	1
0	0	1	0	0	1	0	1	0	0
1	1	0	1	0	1	0	1	0	0
1	1	0	0	1	0	0	0	0	0
0	0	0	0	1	0	1	1	0	0
1	1	0	1	0	0	1	1	0	0
0	0	1	1	1	1	0	1	1	1
0	0	0	1	1	0	1	0	0	1
1	0	0	0	0	1	1	1	0	0
0	0	1	1	0	0	0	1	0	0
1	1	0	0	0	0	0	0	1	0
0	1	1	0	1	0	0	1	0	1
1	0	0	0	0	1	1	1	1	1
0	0	0	0	1	0	0	0	1	0
0	1	0	0	0	0	1	1	0	0
1	1	1	0	0	0	1	0	1	1
1	0	0	0	0	1	1	1	1	0
1	1	0	1	0	1	1	0	1	0
0	0	0	1	1	0	1	1	1	0
0	0	0	0	1	0	1	0	0	0
1	1	0	0	1	1	0	0	0	1
0	1	0	1	1	1	1	1	0	1
0	0	1	1	1	1	1	0	1	1
1	1	0	0	0	1	1	0	0	0
1	1	0	0	0	0	1	1	1	1
0	1	1	1	1	0	1	0	0	1
0	0	1	0	0	1	1	0	1	1
0	1	1	0	0	0	1	0	0	1
0	0	1	0	0	0	0	1	0	1
1	0	0	1	1	0	0	1	1	1
1	1	1	1	1	0	1	0	0	1
1	0	1	1	1	1	0	0	1	1
1	0	0	0	0	1	1	0	1	0
1	0	1	1	0	0	1	1	0	0
0	0	0	0	1	0	0	1	0	1
1	1	0	0	1	1	0	0	1	1
1	0	0	1	0	0	1	1	1	1
0	0	1	1	0	1	1	0	0	1
0	0	0	1	1	1	1	1	1	0
0	1	0	0	0	0	1	1	1	1
1	1	0	1	0	0	0	1	0	0
0	1	0	0	0	1	1	1	1	0
0	0	0	1	1	1	1	1	0	1
1	0	1	0	1	1	0	1	1	1
1	0	0	0	0	0	1	0	0	0
1	0	0	1	1	1	1	0	1	0

## Sheet: together
steps	25th	50th	75th	25th	50th	75th	25th	50th	75th
400	0	0	0	0	0	1	0	0	0
800	0	0	0	0	0	1	0	0	0
1200	0	0	0	0	0	0	0	0	0
1600	0	0	0	0	0.5	1	0	0	0
2000	0	0	0	0	1	1	0	0	0
2400	0	0	0	0	1	1	0	0	0
2800	0	0	0	0	0	0.75	0	0	0
3200	0	0	0	0	0	1	0	0	0
3600	0	0	0	0.25	1	1	0	0	0
4000	0	0	0	0	0	0	0	0	0
4400	0	0	0	0	0	0.75	0	0	0
4800	0	0	0	0	0	0.75	0	0	0
5200	0	0	0	0	1	1	0	0	0
5600	0	0	0	1	1	1	0	0	0
6000	0	0	0	0	0.5	1	0	0	0
6400	0	0	0	0	0	0	0	0	0
6800	0	0	0	0	0	1	0	0	0
7200	0	0	0	0	1	1	0	0	0
7600	0	0	0	0	0	0	0	0	0
8000	0	0	0	0	0.5	1	0	0	0
8400	0	0	0	0	0	1	0	0	0
8800	0	0	0	0	0	1	0	0	0
9200	0	0	0	0	0	1	0	0	1
9600	0	0	0	0	0.5	1	0	0	0
10000	0	0	0	0	0	0.75	0	0	1
10400	0	0	0	0	0.5	1	0	0	1
10800	0	0	0	0	0	1	0	0	1
11200	0	0	0	0	0.5	1	0	0	0
11600	0	0	0	0	0	0.75	0	0	0
12000	0	0	0	0	0	1	0	0	0
12400	0	0	0	0	0.5	1	0	0	0
12800	0	0	0	0	0	1	0	0	0
13200	0	0	0	0	0	0.75	0	1	1
13600	0	0	0	0.25	1	1	0	0.5	1
14000	0	0	0	0	0	0.75	0	0	0
14400	0	0	0	0	0	0.75	0	0.5	1
14800	0	0	0	0	0	1	0	0	1
15200	0	0	0	0	0	1	0	0	1
15600	0	0	0	0	0	0	0	1	1
16000	0	0	0	0	0	1	0	0	0
16400	0	0	0	0	0	1	0	0	1
16800	0	0	0	0	0	1	0	0.5	1
17200	0	0	0	0	0	0.75	0	0	0.75
17600	0	0	0	0	0	1	0	0	0.75
18000	0	0	0	0	1	1	0	0	1
18400	0	0	0	0	0	0.75	0	0	0
18800	0	0	0	0	0	1	0	0	1
19200	0	0	0	0	0.5	1	0	0	1
19600	0	0	0	0	0	0.75	0	0	0.75
20000	0	0	0	0	0.5	1	0	0.5	1
20400	0	0	0	0	0	0	0	0.5	1
20800	0	0	0	0	1	1	0	0	1
21200	0	0	0	1	1	1	0	0.5	1
21600	0	0	0	0	0.5	1	0	0	1
22000	0	0	0	0	0.5	1	0	1	1
22400	0	0	0	0	0	1	0.25	1	1
22800	0	0	0	0	0	0	0.25	1	1
23200	0	0	0	0	0	0.75	0	0.5	1
23600	0	0	0	0	0.5	1	0	0	0.75
24000	0	0	0	0	0.5	1	0	1	1
24400	0	0	0	0	0.5	1	0	0	0.75
24800	0	0	0	0	0	0	0	0.5	1
25200	0	0	0	0	0.5	1	0	0.5	1
25600	0	0	0	0	0.5	1	0	0	1
26000	0	0	0	0	0	0.75	0	0	1
26400	0	0	0	0	0	1	0	1	1
26800	0	0	0.75	0	0	1	0	1	1
27200	0	0	0	0	0	0	1	1	1
27600	0	0	0.75	0	0.5	1	1	1	1
28000	0	0.5	1	0	1	1	0	0	1
28400	0	0	0.75	0	0	1	0	1	1
28800	0	0	0	0	0	0.75	0	1	1
29200	0	0.5	1	0	0	0	0.25	1	1
29600	0	0	0.75	0.25	1	1	1	1	1
30000	0	0	1	0	0.5	1	1	1	1
30400	0	0	0	1	1	1	0	0.5	1
30800	0	0	0	0	0.5	1	0	0	1
31200	0	0	0	0	0	0.75	0	1	1
31600	0	0	1	0	1	1	0.25	1	1
32000	0	0	1	0	0.5	1	0	1	1
32400	0	0	1	0	0	0.75	0	0	1
32800	0	0	1	0	0	0.75	0	0.5	1
33200	0	0.5	1	0	0	0	0.25	1	1
33600	0	0.5	1	0	0.5	1	1	1	1
34000	0	0	1	0	1	1	0	0.5	1
34400	0	0.5	1	1	1	1	0	1	1
34800	0	1	1	0	1	1	0	1	1
35200	0	0.5	1	0	1	1	1	1	1
35600	0	0	1	0	0	1	0.25	1	1
36000	0	0.5	1	0	0	1	0	0	0.75
36400	0	1	1	0	0	1	0	0	1
36800	1	1	1	0	0	0.75	0	0.5	1
37200	0.25	1	1	0	0.5	1	0	1	1
37600	0	1	1	0	0.5	1	0	0.5	1
38000	1	1	1	0	0	0.75	0.25	1	1
38400	1	1	1	0	0.5	1	0	1	1
38800	1	1	1	0	0	0	1	1	1
39200	0	1	1	0	0.5	1	1	1	1
39600	1	1	1	0	1	1	1	1	1
40000	0	1	1	0	0.5	1	1	1	1
40400	1	1	1	0	1	1	0.25	1	1
40800	0.25	1	1	0	0	1	0	0.5	1
41200	0.25	1	1	0	0	0.75	0.25	1	1
41600	1	1	1	0	0.5	1	1	1	1
42000	0.25	1	1	0	0.5	1	0.25	1	1
42400	1	1	1	0	0.5	1	0.25	1	1
42800	1	1	1	0	0.5	1	1	1	1
43200	0.25	1	1	0	0	1	1	1	1
43600	0.25	1	1	0	0.5	1	0.25	1	1
44000	1	1	1	0	0	1	1	1	1
44400	1	1	1	0	0.5	1	1	1	1
44800	1	1	1	0.25	1	1	0	0.5	1
45200	1	1	1	0.25	1	1	0	0	0.75
45600	1	1	1	1	1	1	1	1	1
46000	1	1	1	0	0	0.75	0.25	1	1
46400	1	1	1	0	0.5	1	0.25	1	1
46800	1	1	1	0	1	1	0.25	1	1
47200	1	1	1	0	0.5	1	1	1	1
47600	1	1	1	0	0	1	1	1	1
48000	1	1	1	0	0	1	1	1	1
48400	1	1	1	0	0	0.75	1	1	1
48800	1	1	1	0	0.5	1	1	1	1
49200	1	1	1	0	1	1	0.25	1	1
49600	1	1	1	0	0	0.75	0.25	1	1
50000	1	1	1	0	0	1	0.25	1	1
50400	1	1	1	0	0	0.75	1	1	1
50800	1	1	1	0	0	0	0.25	1	1
51200	1	1	1	0	1	1	1	1	1
51600	1	1	1	0	0	0.75	1	1	1
52000	1	1	1	0	0	0.75	0	1	1
52400	1	1	1	0	0	0	1	1	1
52800	1	1	1	0	0.5	1	0.25	1	1
53200	1	1	1	0	0	0.75	0.25	1	1
53600	1	1	1	0	0.5	1	0.25	1	1
54000	1	1	1	0	0	0.75	0	1	1
54400	1	1	1	1	1	1	1	1	1
54800	1	1	1	0	0	1	1	1	1
55200	1	1	1	0	0.5	1	1	1	1
55600	1	1	1	0	1	1	0	1	1
56000	1	1	1	0	0	0.75	0	1	1
56400	1	1	1	0	0.5	1	0	1	1
56800	1	1	1	0	0	1	0.25	1	1
57200	1	1	1	0.25	1	1	1	1	1
57600	1	1	1	0	0.5	1	0.25	1	1
58000	1	1	1	0	0	1	0	1	1
58400	1	1	1	0	0	1	0	0.5	1
58800	1	1	1	1	1	1	1	1	1
59200	1	1	1	0	0	0	1	1	1
59600	1	1	1	0	0	0.75	0	1	1
60000	1	1	1	0	0.5	1	1	1	1
60400	1	1	1	0	0	0	1	1	1
60800	1	1	1	0	0	1	1	1	1
61200	1	1	1	0	0	1	1	1	1
61600	1	1	1	0	0	1	1	1	1
62000	1	1	1	0	0	1	0.25	1	1
62400	1	1	1	0	0	0.75	0.25	1	1
62800	1	1	1	0	1	1	1	1	1
63200	1	1	1	0	1	1	1	1	1
63600	1	1	1	0	0.5	1	1	1	1
64000	1	1	1	0	0	1	0.25	1	1
64400	1	1	1	0	0.5	1	0	1	1
64800	1	1	1	0	1	1	0	1	1
65200	1	1	1	0	1	1	1	1	1
65600	1	1	1	0.25	1	1	1	1	1
66000	1	1	1	0.25	1	1	1	1	1
66400	1	1	1	0	0	0.75	1	1	1
66800	1	1	1	0	1	1	1	1	1
67200	1	1	1	0	1	1	1	1	1
67600	1	1	1	0	1	1	0	1	1
68000	1	1	1	0	0	1	1	1	1
68400	1	1	1	0	0.5	1	0	1	1
68800	1	1	1	0	0	1	1	1	1
69200	1	1	1	0	0	1	1	1	1
69600	1	1	1	0	0	1	0	1	1
70000	1	1	1	0	0	1	1	1	1
70400	1	1	1	0	0.5	1	1	1	1
70800	1	1	1	0	0	1	0	1	1
71200	1	1	1	0	0.5	1	0	1	1
71600	1	1	1	0	0	1	0	1	1
72000	1	1	1	0	0	1	1	1	1
72400	1	1	1	0	0.5	1	0.25	1	1
72800	1	1	1	0	0	0	1	1	1
73200	1	1	1	0	0	1	0	1	1
73600	1	1	1	0	0	0.75	1	1	1
74000	1	1	1	0	0	0	1	1	1
74400	1	1	1	1	1	1	1	1	1
74800	1	1	1	0	1	1	1	1	1
75200	1	1	1	0	0	1	0.25	1	1
75600	1	1	1	0	0	1	0	1	1
76000	1	1	1	0	0	1	1	1	1
76400	1	1	1	0	0	0	1	1	1
76800	1	1	1	0	0.5	1	0	1	1
77200	1	1	1	0	0.5	1	1	1	1
77600	1	1	1	0	0	1	1	1	1
78000	1	1	1	0	0	0	0.25	1	1
78400	1	1	1	0	0	0.75	0.25	1	1
78800	1	1	1	0.25	1	1	0	0.5	1
79200	1	1	1	1	1	1	1	1	1
79600	1	1	1	0	0.5	1	0.25	1	1
80000	1	1	1	0	1	1	1	1	1
80400	1	1	1	0	0	0.75	0.25	1	1
80800	1	1	1	0	0	0	1	1	1
81200	1	1	1	0	1	1	0.25	1	1
81600	1	1	1	0	1	1	0	1	1
82000	1	1	1	0	1	1	0	1	1
82400	1	1	1	0	0.5	1	0	1	1
82800	1	1	1	0.25	1	1	1	1	1
83200	1	1	1	0	0	1	1	1	1
83600	1	1	1	0	0	0.75	1	1	1
84000	1	1	1	0	0	0.75	1	1	1
84400	1	1	1	0	0	1	0.25	1	1
84800	1	1	1	0.25	1	1	1	1	1
85200	1	1	1	0	0.5	1	0	1	1
85600	1	1	1	0	0	0.75	0	1	1
86000	1	1	1	0	0	1	1	1	1
86400	1	1	1	1	1	1	1	1	1
86800	1	1	1	0	0.5	1	1	1	1
87200	1	1	1	1	1	1	1	1	1
87600	1	1	1	0.25	1	1	1	1	1
88000	1	1	1	0	0	0	1	1	1
88400	1	1	1	0	0	1	0.25	1	1
88800	1	1	1	0	0	0.75	0	0	1
89200	1	1	1	0	0	0.75	1	1	1
89600	1	1	1	1	1	1	1	1	1
90000	1	1	1	1	1	1	1	1	1
90400	1	1	1	0.25	1	1	1	1	1
90800	1	1	1	0	0	1	1	1	1
91200	1	1	1	0	0	0.75	1	1	1
91600	1	1	1	0	0	0.75	1	1	1
92000	1	1	1	1	1	1	0.25	1	1
92400	1	1	1	0	0	0	0.25	1	1
92800	1	1	1	0	0	0.75	0.25	1	1
93200	1	1	1	0	1	1	0.25	1	1
93600	1	1	1	0	0	0.75	1	1	1
94000	1	1	1	0	0	0.75	0.25	1	1
94400	1	1	1	0	1	1	1	1	1
94800	1	1	1	0	0	0.75	1	1	1
95200	1	1	1	0	1	1	0.25	1	1
95600	1	1	1	0	0	0.75	1	1	1
96000	1	1	1	0	0.5	1	1	1	1
96400	1	1	1	0	0	0.75	0	1	1
96800	1	1	1	0	0	1	1	1	1
97200	1	1	1	0	0	1	1	1	1
97600	1	1	1	0	0	0	0	1	1
98000	1	1	1	1	1	1	0.25	1	1
98400	1	1	1	0	0.5	1	1	1	1
98800	1	1	1	0	0	0	0	0.5	1
99200	1	1	1	0	0	1	0.25	1	1
99600	1	1	1	0	0	0.75	0	1	1
100000	1	1	1	0	0	0.75	0	1	1
100400	1	1	1	0	1	1	0	1	1
100800	1	1	1	0	0	1	0.25	1	1
101200	1	1	1	0	0	1	0.25	1	1
101600	1	1	1	0	0	1	1	1	1
102000	1	1	1	0	0	0.75	1	1	1
102400	1	1	1	0	1	1	1	1	1
102800	1	1	1	0	0	1	1	1	1
103200	1	1	1	0	1	1	0.25	1	1
103600	1	1	1	0	0	1	0.25	1	1
104000	1	1	1	0.25	1	1	0	1	1
104400	1	1	1	0	1	1	0	1	1
104800	1	1	1	0	0	0.75	0.25	1	1
105200	1	1	1	0	0	1	0.25	1	1
105600	1	1	1	0	0	1	1	1	1
106000	1	1	1	0	0	0	1	1	1
106400	1	1	1	0	0	0.75	1	1	1
106800	1	1	1	0	0	1	0	0.5	1
107200	1	1	1	0	0.5	1	1	1	1
107600	1	1	1	0	0.5	1	1	1	1
108000	1	1	1	0	0	1	0	1	1
108400	1	1	1	0	0.5	1	1	1	1
108800	1	1	1	0	0	0.75	0.25	1	1
109200	1	1	1	0	0	1	0.25	1	1
109600	1	1	1	0	0	0	1	1	1
110000	1	1	1	0	0	0.75	1	1	1
110400	1	1	1	0	0.5	1	1	1	1
110800	1	1	1	0	0.5	1	1	1	1
111200	1	1	1	0	1	1	1	1	1
111600	1	1	1	0	1	1	0	0.5	1
112000	1	1	1	0	0	1	0.25	1	1
112400	1	1	1	0	1	1	1	1	1
112800	1	1	1	0	1	1	0.25	1	1
113200	1	1	1	0	0	1	0.25	1	1
113600	1	1	1	0	0	1	0.25	1	1
114000	1	1	1	0	0	0	0.25	1	1
114400	1	1	1	0	0	1	0.25	1	1
114800	1	1	1	0	0	0	1	1	1
115200	1	1	1	0	0	1	0.25	1	1
115600	1	1	1	0	0	0.75	0.25	1	1
116000	1	1	1	0	0.5	1	1	1	1
116400	1	1	1	0	0	1	1	1	1
116800	1	1	1	0	1	1	1	1	1
117200	1	1	1	0	0.5	1	1	1	1
117600	1	1	1	0	0.5	1	1	1	1
118000	1	1	1	0	0	0	1	1	1
118400	1	1	1	0	0	0.75	0	1	1
118800	1	1	1	0	1	1	1	1	1
119200	1	1	1	0	0	0.75	0	1	1
119600	1	1	1	0	0.5	1	1	1	1
120000	1	1	1	0.25	1	1	0	1	1
120400	1	1	1	0	0	1	0.25	1	1
120800	1	1	1	0	0	1	0.25	1	1
121200	1	1	1	0	1	1	1	1	1
121600	1	1	1	0	0	0.75	1	1	1
122000	1	1	1	0	0	0	1	1	1
122400	1	1	1	0	0	1	0.25	1	1
122800	1	1	1	0	1	1	0	1	1
123200	1	1	1	0	0	1	1	1	1
123600	1	1	1	0	0	0	1	1	1
124000	1	1	1	0.25	1	1	1	1	1
124400	1	1	1	0	0.5	1	0.25	1	1
124800	1	1	1	0	0	0.75	1	1	1
125200	1	1	1	0.25	1	1	1	1	1
125600	1	1	1	0	0.5	1	1	1	1
126000	1	1	1	0	0	0.75	0.25	1	1
126400	1	1	1	0	0	1	1	1	1
126800	1	1	1	0.25	1	1	0.25	1	1
127200	1	1	1	0	0	0.75	1	1	1
127600	1	1	1	0	0	0	0	1	1
128000	1	1	1	0	0	1	0.25	1	1
128400	1	1	1	0	1	1	0	1	1
128800	1	1	1	0	1	1	1	1	1
129200	1	1	1	0	1	1	0	1	1
129600	1	1	1	0	0.5	1	1	1	1
130000	1	1	1	0	1	1	1	1	1
130400	1	1	1	0	0	1	0	1	1
130800	1	1	1	0	0.5	1	0.25	1	1
131200	1	1	1	0	0.5	1	1	1	1
131600	1	1	1	0.25	1	1	0.25	1	1
132000	1	1	1	0	0	0.75	0.25	1	1
132400	1	1	1	0	1	1	1	1	1
132800	1	1	1	0	0	1	0.25	1	1
133200	1	1	1	0	0	1	1	1	1
133600	1	1	1	0	0	0.75	1	1	1
134000	1	1	1	0	0.5	1	0.25	1	1
134400	1	1	1	0	0	1	1	1	1
134800	1	1	1	0	0	1	0	1	1
135200	1	1	1	0	0.5	1	0.25	1	1
135600	1	1	1	0	1	1	1	1	1
136000	1	1	1	0	1	1	1	1	1
136400	1	1	1	0	0	1	0	1	1
136800	1	1	1	0	0.5	1	0.25	1	1
137200	1	1	1	0	0.5	1	1	1	1
137600	1	1	1	0	0	1	0	0.5	1
138000	1	1	1	0	1	1	0.25	1	1
138400	1	1	1	0	0	0	1	1	1
138800	1	1	1	0	0	1	0	0.5	1
139200	1	1	1	0	1	1	0	1	1
139600	1	1	1	0	0	0	1	1	1
140000	1	1	1	0	1	1	1	1	1
140400	1	1	1	0	1	1	0.25	1	1
140800	1	1	1	0	0	0.75	0.25	1	1
141200	1	1	1	0	1	1	0.25	1	1
141600	1	1	1	0	1	1	0.25	1	1
142000	1	1	1	0	0	1	1	1	1
142400	1	1	1	0	0	0	1	1	1
142800	1	1	1	0	0	0	1	1	1
143200	1	1	1	0	0.5	1	0.25	1	1
143600	1	1	1	0	0	1	1	1	1
144000	1	1	1	0.25	1	1	1	1	1
144400	1	1	1	0	1	1	1	1	1
144800	1	1	1	0	0	1	1	1	1
145200	1	1	1	0	0	1	1	1	1
145600	1	1	1	0	0.5	1	0.25	1	1
146000	1	1	1	0	0	1	0.25	1	1
146400	1	1	1	0	1	1	0.25	1	1
146800	1	1	1	0	0.5	1	1	1	1
147200	1	1	1	0	0.5	1	0.25	1	1
147600	1	1	1	0	0.5	1	0.25	1	1
148000	1	1	1	0	1	1	0.25	1	1
148400	1	1	1	0	0.5	1	1	1	1
148800	1	1	1	0	0	1	0.25	1	1
149200	1	1	1	0	1	1	0	1	1
149600	1	1	1	0	0.5	1	0	1	1
150000	1	1	1	0	0.5	1	1	1	1
150400	1	1	1	0	0.5	1	0.25	1	1
150800	1	1	1	0	0.5	1	1	1	1
151200	1	1	1	0	0	1	1	1	1
151600	1	1	1	0	0	1	1	1	1
152000	1	1	1	0	0	0.75	0	0.5	1
152400	1	1	1	0	1	1	1	1	1
152800	1	1	1	0	0	0	1	1	1
153200	1	1	1	0	0.5	1	0.25	1	1
153600	1	1	1	0	1	1	1	1	1
154000	1	1	1	0	0	0.75	1	1	1
154400	1	1	1	0	0	0.75	0	1	1
154800	1	1	1	0.25	1	1	1	1	1
155200	1	1	1	0.25	1	1	1	1	1
155600	1	1	1	0.25	1	1	0.25	1	1
156000	1	1	1	0	1	1	1	1	1
156400	1	1	1	0	0.5	1	1	1	1
156800	1	1	1	0	0	0.75	1	1	1
157200	1	1	1	0	0.5	1	1	1	1
157600	1	1	1	0	0	1	1	1	1
158000	1	1	1	0.25	1	1	0.25	1	1
158400	1	1	1	0.25	1	1	1	1	1
158800	1	1	1	0	1	1	1	1	1
159200	1	1	1	0	0	0.75	1	1	1
159600	1	1	1	0.25	1	1	0.25	1	1
160000	1	1	1	0	0	1	1	1	1
160400	1	1	1	0	0.5	1	1	1	1
160800	1	1	1	0	0	1	1	1	1
161200	1	1	1	0	0	0	1	1	1
161600	1	1	1	0	0.5	1	1	1	1
162000	1	1	1	0	0	1	1	1	1
162400	1	1	1	0	1	1	1	1	1
162800	1	1	1	0.25	1	1	1	1	1
163200	1	1	1	1	1	1	0.25	1	1
163600	1	1	1	0	1	1	1	1	1
164000	1	1	1	0	1	1	0	0.5	1
164400	1	1	1	0.25	1	1	0	1	1
164800	1	1	1	0	1	1	1	1	1
165200	1	1	1	1	1	1	1	1	1
165600	1	1	1	0	0.5	1	1	1	1
166000	1	1	1	0	0	1	1	1	1
166400	1	1	1	0.25	1	1	1	1	1
166800	1	1	1	0	1	1	1	1	1
167200	1	1	1	0	0	1	0	1	1
167600	1	1	1	0	1	1	0.25	1	1
168000	1	1	1	0.25	1	1	1	1	1
168400	1	1	1	0	0.5	1	1	1	1
168800	1	1	1	0	0	0	1	1	1
169200	1	1	1	0	0.5	1	1	1	1
169600	1	1	1	0	1	1	1	1	1
170000	1	1	1	0	1	1	1	1	1
170400	1	1	1	0.25	1	1	1	1	1
170800	1	1	1	0	0.5	1	0.25	1	1
171200	1	1	1	1	1	1	1	1	1
171600	1	1	1	0	1	1	1	1	1
172000	1	1	1	0	0	0	1	1	1
172400	1	1	1	0	0	1	1	1	1
172800	1	1	1	0.25	1	1	0	0	1
173200	1	1	1	0	0	0.75	1	1	1
173600	1	1	1	0	0.5	1	0	0.5	1
174000	1	1	1	0.25	1	1	1	1	1
174400	1	1	1	0	1	1	0.25	1	1
174800	1	1	1	0.25	1	1	0.25	1	1
175200	1	1	1	0	0	0.75	0	1	1
175600	1	1	1	0	1	1	0	0.5	1
176000	1	1	1	0	0	0.75	0	1	1
176400	1	1	1	1	1	1	1	1	1
176800	1	1	1	0	0.5	1	0.25	1	1
177200	1	1	1	0	0.5	1	0.25	1	1
177600	1	1	1	0	0.5	1	0	1	1
178000	1	1	1	0	0	1	0.25	1	1
178400	1	1	1	0	0	1	1	1	1
178800	1	1	1	0	0	0	1	1	1
179200	1	1	1	0	0.5	1	1	1	1
179600	1	1	1	0	1	1	1	1	1
180000	1	1	1	0	0	1	0.25	1	1
180400	1	1	1	0.25	1	1	0	0	1
180800	1	1	1	0	1	1	1	1	1
181200	1	1	1	0	0.5	1	0	1	1
181600	1	1	1	0.25	1	1	1	1	1
182000	1	1	1	0	1	1	1	1	1
182400	1	1	1	0.25	1	1	0.25	1	1
182800	1	1	1	0	0	1	1	1	1
183200	1	1	1	0.25	1	1	1	1	1
183600	1	1	1	0	0.5	1	0.25	1	1
184000	1	1	1	0	0.5	1	0.25	1	1
184400	1	1	1	0	0	1	0.25	1	1
184800	1	1	1	0	0	0.75	1	1	1
185200	1	1	1	0	1	1	1	1	1
185600	1	1	1	0	1	1	1	1	1
186000	1	1	1	0	0.5	1	1	1	1
186400	1	1	1	0	1	1	0.25	1	1
186800	1	1	1	0	0	0	1	1	1
187200	1	1	1	0	0	0.75	1	1	1
187600	1	1	1	0	0.5	1	1	1	1
188000	1	1	1	0	1	1	0.25	1	1
188400	1	1	1	0	0	1	1	1	1
188800	1	1	1	0	1	1	1	1	1
189200	1	1	1	0	0	0.75	1	1	1
189600	1	1	1	0	0	0	0	1	1
190000	1	1	1	0	0	1	0.25	1	1
190400	1	1	1	0.25	1	1	1	1	1
190800	1	1	1	0	1	1	1	1	1
191200	1	1	1	0	0.5	1	0.25	1	1
191600	1	1	1	0	0	0	1	1	1
192000	1	1	1	0	0	0.75	0	1	1
192400	1	1	1	0	1	1	1	1	1
192800	1	1	1	0	0.5	1	1	1	1
193200	1	1	1	0	0.5	1	1	1	1
193600	1	1	1	0	1	1	1	1	1
194000	1	1	1	0	0	1	1	1	1
194400	1	1	1	0	0	1	1	1	1
194800	1	1	1	0.25	1	1	0.25	1	1
195200	1	1	1	0	0	0.75	0.25	1	1
195600	1	1	1	0	0.5	1	0	0	1
196000	1	1	1	0.25	1	1	1	1	1
196400	1	1	1	0	0	1	1	1	1
196800	1	1	1	0	0	1	1	1	1
197200	1	1	1	1	1	1	1	1	1
197600	1	1	1	0	0.5	1	1	1	1
198000	1	1	1	0	0	1	1	1	1
198400	1	1	1	0	0.5	1	1	1	1
198800	1	1	1	1	1	1	0.25	1	1
199200	1	1	1	0	0	0.75	1	1	1
199600	1	1	1	0	0.5	1	1	1	1
200000	1	1	1	0	0	1	0.25	1	1
200400	1	1	1	0	0	1	0	1	1
200800	1	1	1	0	1	1	1	1	1
201200	1	1	1	0	0.5	1	0.25	1	1
201600	1	1	1	0	0.5	1	1	1	1
202000	1	1	1	0.25	1	1	1	1	1
202400	1	1	1	0	0.5	1	0.25	1	1
202800	1	1	1	0	1	1	1	1	1
203200	1	1	1	0	0.5	1	1	1	1
203600	1	1	1	0	0	0	1	1	1
204000	1	1	1	0	0.5	1	0.25	1	1
204400	1	1	1	0	0.5	1	0.25	1	1
204800	1	1	1	0	0	0.75	1	1	1
205200	1	1	1	0.25	1	1	1	1	1
205600	1	1	1	0	0	1	1	1	1
206000	1	1	1	0	0	0	1	1	1
206400	1	1	1	0	0.5	1	0	1	1
206800	1	1	1	0	0	0	1	1	1
207200	1	1	1	0	0.5	1	1	1	1
207600	1	1	1	0	0.5	1	1	1	1
208000	1	1	1	0	1	1	1	1	1
208400	1	1	1	0	0	1	1	1	1
208800	1	1	1	0	1	1	1	1	1
209200	1	1	1	0	0	1	0	1	1
209600	1	1	1	0	1	1	0.25	1	1
210000	1	1	1	0	1	1	1	1	1
210400	1	1	1	1	1	1	1	1	1
210800	1	1	1	0	0	1	0.25	1	1
211200	1	1	1	0	0	0.75	0.25	1	1
211600	1	1	1	0	1	1	1	1	1
212000	1	1	1	0	0	1	0.25	1	1
212400	1	1	1	0	1	1	1	1	1
212800	1	1	1	0.25	1	1	1	1	1
213200	1	1	1	0.25	1	1	1	1	1
213600	1	1	1	0	1	1	1	1	1
214000	1	1	1	0	0.5	1	1	1	1
214400	1	1	1	0	0	1	1	1	1
214800	1	1	1	0	0.5	1	1	1	1
215200	1	1	1	0	1	1	1	1	1
215600	1	1	1	0.25	1	1	0	1	1
216000	1	1	1	0	0.5	1	1	1	1
216400	1	1	1	1	1	1	1	1	1
216800	1	1	1	0	0.5	1	0	1	1
217200	1	1	1	0	0	0.75	1	1	1
217600	1	1	1	0	0.5	1	1	1	1
218000	1	1	1	1	1	1	1	1	1
218400	1	1	1	0	0	0.75	0	1	1
218800	1	1	1	0	0.5	1	1	1	1
219200	1	1	1	0	0	1	1	1	1
219600	1	1	1	0	1	1	1	1	1
220000	1	1	1	0.25	1	1	0.25	1	1
220400	1	1	1	0	0	0.75	1	1	1
220800	1	1	1	0	0.5	1	0	1	1
221200	1	1	1	0	0.5	1	1	1	1
221600	1	1	1	0	0.5	1	0.25	1	1
222000	1	1	1	0	1	1	0.25	1	1
222400	1	1	1	0	1	1	1	1	1
222800	1	1	1	0	1	1	0.25	1	1
223200	1	1	1	0	1	1	1	1	1
223600	1	1	1	0	1	1	1	1	1
224000	1	1	1	0	0	0.75	1	1	1
224400	1	1	1	0	0	0	1	1	1
224800	1	1	1	0	0	1	0	1	1
225200	1	1	1	0	0	1	0	1	1
225600	1	1	1	0	1	1	0.25	1	1
226000	1	1	1	0	0	1	0.25	1	1
226400	1	1	1	0	0.5	1	0.25	1	1
226800	1	1	1	0	1	1	0	1	1
227200	1	1	1	0	1	1	1	1	1
227600	1	1	1	0	0.5	1	1	1	1
228000	1	1	1	0.25	1	1	0	0.5	1
228400	1	1	1	0.25	1	1	1	1	1
228800	1	1	1	0	0	0	1	1	1
229200	1	1	1	0	0	0.75	0.25	1	1
229600	1	1	1	0	1	1	0	1	1
230000	1	1	1	0	0	1	0.25	1	1
230400	1	1	1	0	0.5	1	1	1	1
230800	1	1	1	0	0.5	1	1	1	1
231200	1	1	1	0	0	0.75	0	1	1
231600	1	1	1	0	0.5	1	1	1	1
232000	1	1	1	0.25	1	1	1	1	1
232400	1	1	1	0	0.5	1	0.25	1	1
232800	1	1	1	0	0	1	1	1	1
233200	1	1	1	0	0.5	1	1	1	1
233600	1	1	1	0	0	1	1	1	1
234000	1	1	1	0	1	1	0.25	1	1
234400	1	1	1	0	0	1	0.25	1	1
234800	1	1	1	0	0.5	1	0	0.5	1
235200	1	1	1	0	0	1	1	1	1
235600	1	1	1	0	0	0	0.25	1	1
236000	1	1	1	0	0	0.75	0	1	1
236400	1	1	1	0	0.5	1	0.25	1	1
236800	1	1	1	0	1	1	0.25	1	1
237200	1	1	1	0	0	1	1	1	1
237600	1	1	1	0	0	1	1	1	1
238000	1	1	1	1	1	1	1	1	1
238400	1	1	1	1	1	1	1	1	1
238800	1	1	1	0.25	1	1	1	1	1
239200	1	1	1	0	0.5	1	0	0.5	1
239600	1	1	1	0	0	0.75	1	1	1
240000	1	1	1	0	0	0	0	1	1
240400	1	1	1	0	0.5	1	1	1	1
240800	1	1	1	0	0	1	1	1	1
241200	1	1	1	0	0.5	1	0	0.5	1
241600	1	1	1	0	1	1	0.25	1	1
242000	1	1	1	0	1	1	1	1	1
242400	1	1	1	0	0.5	1	1	1	1
242800	1	1	1	0	0.5	1	1	1	1
243200	1	1	1	0	0.5	1	1	1	1
243600	1	1	1	0	0	1	0	0	1
244000	1	1	1	0	1	1	0	0	1
244400	1	1	1	0	0.5	1	1	1	1
244800	1	1	1	0	1	1	1	1	1
245200	1	1	1	0	0.5	1	1	1	1
245600	1	1	1	0	0.5	1	1	1	1
246000	1	1	1	0	0	1	1	1	1
246400	1	1	1	0	0.5	1	1	1	1
246800	1	1	1	0	0.5	1	1	1	1
247200	1	1	1	0	0	1	1	1	1
247600	1	1	1	0	1	1	0.25	1	1
248000	1	1	1	0	0.5	1	1	1	1
248400	1	1	1	0	0	1	0	0.5	1
248800	1	1	1	0	0	1	1	1	1
249200	1	1	1	1	1	1	1	1	1
249600	1	1	1	0.25	1	1	0.25	1	1
250000	1	1	1	0.25	1	1	1	1	1
250400	1	1	1	0	0.5	1	1	1	1
250800	1	1	1	0	0.5	1	1	1	1
251200	1	1	1	0.25	1	1	1	1	1
251600	1	1	1	0	0	0.75	0.25	1	1
252000	1	1	1	0	0	1	0.25	1	1
252400	1	1	1	0	0.5	1	1	1	1
252800	1	1	1	0	0.5	1	0	1	1
253200	1	1	1	1	1	1	0.25	1	1
253600	1	1	1	0.25	1	1	1	1	1
254000	1	1	1	0	0.5	1	0	1	1
254400	1	1	1	0	0.5	1	0	1	1
254800	1	1	1	0	0	1	1	1	1
255200	1	1	1	0	0.5	1	1	1	1
255600	1	1	1	0	0	1	1	1	1
256000	1	1	1	0	0	1	1	1	1
256400	1	1	1	0	0.5	1	1	1	1
256800	1	1	1	0	0	0.75	1	1	1
257200	1	1	1	0.25	1	1	1	1	1
257600	1	1	1	0	0	0.75	1	1	1
258000	1	1	1	0	0	1	0.25	1	1
258400	1	1	1	0	0	1	0	1	1
258800	1	1	1	0	0	1	0.25	1	1
259200	1	1	1	1	1	1	1	1	1
259600	1	1	1	0.25	1	1	1	1	1
260000	1	1	1	0	1	1	0.25	1	1
260400	1	1	1	0	0	1	0.25	1	1
260800	1	1	1	0	1	1	1	1	1
261200	1	1	1	0	1	1	1	1	1
261600	1	1	1	1	1	1	0	0.5	1
262000	1	1	1	0	0	0.75	0	1	1
262400	1	1	1	0.25	1	1	1	1	1
262800	1	1	1	1	1	1	1	1	1
263200	1	1	1	0	0	0.75	1	1	1
263600	1	1	1	0	0	1	0.25	1	1
264000	1	1	1	0	1	1	1	1	1
264400	1	1	1	0	0	1	1	1	1
264800	1	1	1	0.25	1	1	0	1	1
265200	1	1	1	0	0	0	1	1	1
265600	1	1	1	0	0	1	0	1	1
266000	1	1	1	0	0	1	0.25	1	1
266400	1	1	1	0	0	1	1	1	1
266800	1	1	1	0	0	1	1	1	1
267200	1	1	1	0	1	1	1	1	1
267600	1	1	1	0	0.5	1	1	1	1
268000	1	1	1	0	1	1	0.25	1	1
268400	1	1	1	0	1	1	0.25	1	1
268800	1	1	1	0	0	0.75	0	0.5	1
269200	1	1	1	0	0	1	1	1	1
269600	1	1	1	0	0.5	1	1	1	1
270000	1	1	1	0	0.5	1	1	1	1
270400	1	1	1	0	0	0.75	0	1	1
270800	1	1	1	0	0.5	1	1	1	1
271200	1	1	1	0	0	0.75	0	1	1
271600	1	1	1	0	0.5	1	0.25	1	1
272000	1	1	1	0	0	1	0.25	1	1
272400	1	1	1	0	0.5	1	0.25	1	1
272800	1	1	1	0	0.5	1	0	0.5	1
273200	1	1	1	0	0	0	0.25	1	1
273600	1	1	1	0	0	0.75	1	1	1
274000	1	1	1	0	0	0.75	0.25	1	1
274400	1	1	1	0	0	1	1	1	1
274800	1	1	1	0	0	1	0	1	1
275200	1	1	1	1	1	1	1	1	1
275600	1	1	1	0	0.5	1	1	1	1
276000	1	1	1	0	1	1	0	1	1
276400	1	1	1	0	0	1	0	0.5	1
276800	1	1	1	0	0.5	1	1	1	1
277200	1	1	1	0	1	1	1	1	1
277600	1	1	1	0	0.5	1	0.25	1	1
278000	1	1	1	0	1	1	1	1	1
278400	1	1	1	0	1	1	1	1	1
278800	1	1	1	0	0.5	1	1	1	1
279200	1	1	1	0	1	1	0.25	1	1
279600	1	1	1	0.25	1	1	1	1	1
280000	1	1	1	0	0	1	0.25	1	1
280400	1	1	1	0	0	1	0.25	1	1
280800	1	1	1	0	0.5	1	1	1	1
281200	1	1	1	0	1	1	0.25	1	1
281600	1	1	1	0	0.5	1	1	1	1
282000	1	1	1	0	0	1	0	0.5	1
282400	1	1	1	0	0	0	1	1	1
282800	1	1	1	0.25	1	1	1	1	1
283200	1	1	1	0	0	1	1	1	1
283600	1	1	1	0	0.5	1	0	0.5	1
284000	1	1	1	0.25	1	1	0.25	1	1
284400	1	1	1	0	0	0	1	1	1
284800	1	1	1	0	0.5	1	1	1	1
285200	1	1	1	0	0	1	1	1	1
285600	1	1	1	0	0.5	1	1	1	1
286000	1	1	1	0.25	1	1	1	1	1
286400	1	1	1	0	0	0.75	1	1	1
286800	1	1	1	0	0.5	1	0.25	1	1
287200	1	1	1	0	1	1	1	1	1
287600	1	1	1	0	0	1	1	1	1
288000	1	1	1	1	1	1	1	1	1
288400	1	1	1	1	1	1	1	1	1
288800	1	1	1	0	0	1	1	1	1
289200	1	1	1	0	0	1	1	1	1
289600	1	1	1	0	0	0.75	1	1	1
290000	1	1	1	0	0.5	1	1	1	1
290400	1	1	1	0.25	1	1	1	1	1
290800	1	1	1	0.25	1	1	1	1	1
291200	1	1	1	0.25	1	1	1	1	1
291600	1	1	1	0	1	1	1	1	1
292000	1	1	1	0	0.5	1	1	1	1
292400	1	1	1	0	1	1	1	1	1
292800	1	1	1	0	0	0.75	1	1	1
293200	1	1	1	0.25	1	1	0	1	1
293600	1	1	1	1	1	1	0	1	1
294000	1	1	1	0	1	1	0	1	1
294400	1	1	1	0	0.5	1	1	1	1
294800	1	1	1	0	0.5	1	0.25	1	1
295200	1	1	1	0	0.5	1	1	1	1
295600	1	1	1	0	0.5	1	1	1	1
296000	1	1	1	0	1	1	1	1	1
296400	1	1	1	0	1	1	0.25	1	1
296800	1	1	1	0	0	0	1	1	1
297200	1	1	1	0	1	1	0.25	1	1
297600	1	1	1	0	0.5	1	1	1	1
298000	1	1	1	0	0.5	1	1	1	1
298400	1	1	1	0	0.5	1	0	0	1
298800	1	1	1	0	0	1	1	1	1
299200	1	1	1	0.25	1	1	0.25	1	1
299600	1	1	1	0	0	1	1	1	1
300000	1	1	1	0	0.5	1	1	1	1
300400	1	1	1	0.25	1	1	0	0.5	1
300800	1	1	1	0	0.5	1	0.25	1	1
301200	1	1	1	0.25	1	1	0	1	1
301600	1	1	1	1	1	1	1	1	1
302000	1	1	1	1	1	1	1	1	1
302400	1	1	1	0	0.5	1	0	0.5	1
302800	1	1	1	0	0.5	1	0.25	1	1
303200	1	1	1	0	0	0.75	0.25	1	1
303600	1	1	1	0	0	0.75	0	1	1
304000	1	1	1	0	0.5	1	0	0	1
304400	1	1	1	0	0.5	1	1	1	1
304800	1	1	1	0	0.5	1	1	1	1
305200	1	1	1	0	0	0	0	0.5	1
305600	1	1	1	0	0.5	1	1	1	1
306000	1	1	1	0	0	0.75	0	1	1
306400	1	1	1	0	0	1	1	1	1
306800	1	1	1	0.25	1	1	0	1	1
307200	1	1	1	1	1	1	1	1	1
307600	1	1	1	0	0	0	0.25	1	1
308000	1	1	1	0	0	1	0.25	1	1
308400	1	1	1	0	0	0.75	1	1	1
308800	1	1	1	0.25	1	1	1	1	1
309200	1	1	1	0	1	1	1	1	1
309600	1	1	1	0	1	1	1	1	1
310000	1	1	1	0	1	1	0.25	1	1
310400	1	1	1	0	0.5	1	0.25	1	1
310800	1	1	1	0	0.5	1	1	1	1
311200	1	1	1	0	0	1	1	1	1
311600	1	1	1	0	0	1	0	1	1
312000	1	1	1	0.25	1	1	1	1	1
312400	1	1	1	0	1	1	0.25	1	1
312800	1	1	1	0	1	1	1	1	1
313200	1	1	1	0	0	0	1	1	1
313600	1	1	1	0.25	1	1	0	1	1
314000	1	1	1	0	0.5	1	1	1	1
314400	1	1	1	0	1	1	1	1	1
314800	1	1	1	0	0.5	1	0	0.5	1
315200	1	1	1	0.25	1	1	1	1	1
315600	1	1	1	0.25	1	1	0	1	1
316000	1	1	1	0.25	1	1	1	1	1
316400	1	1	1	0	0	0.75	0	1	1
316800	1	1	1	0.25	1	1	1	1	1
317200	1	1	1	0	1	1	1	1	1
317600	1	1	1	0	1	1	0.25	1	1
318000	1	1	1	0.25	1	1	0	1	1
318400	1	1	1	0	0	0.75	1	1	1
318800	1	1	1	0	0	1	1	1	1
319200	1	1	1	0	1	1	1	1	1
319600	1	1	1	0	0	1	0.25	1	1
320000	1	1	1	0	0	1	1	1	1
320400	1	1	1	0	1	1	1	1	1
320800	1	1	1	0	1	1	0	1	1
321200	1	1	1	0	1	1	1	1	1
321600	1	1	1	0.25	1	1	1	1	1
322000	1	1	1	0	0.5	1	1	1	1
322400	1	1	1	0	1	1	1	1	1
322800	1	1	1	1	1	1	1	1	1
323200	1	1	1	0	0	0	1	1	1
323600	1	1	1	0	0	0.75	0.25	1	1
324000	1	1	1	0	0	0.75	1	1	1
324400	1	1	1	0	1	1	1	1	1
324800	1	1	1	0	1	1	0.25	1	1
325200	1	1	1	0	0.5	1	0.25	1	1
325600	1	1	1	0	0	0.75	1	1	1
326000	1	1	1	0	0.5	1	0	1	1
326400	1	1	1	0	0	0	1	1	1
326800	1	1	1	0	1	1	1	1	1
327200	1	1	1	0	0	1	1	1	1
327600	1	1	1	0	1	1	1	1	1
328000	1	1	1	0	0	1	1	1	1
328400	1	1	1	0	1	1	0	1	1
328800	1	1	1	0	0.5	1	0.25	1	1
329200	1	1	1	0	0	0.75	1	1	1
329600	1	1	1	0	0	1	0	1	1
330000	1	1	1	0.25	1	1	0.25	1	1
330400	1	1	1	0	0	1	1	1	1
330800	1	1	1	0	1	1	1	1	1
331200	1	1	1	0	1	1	0.25	1	1
331600	1	1	1	0	0.5	1	1	1	1
332000	1	1	1	0	0	0	0	1	1
332400	1	1	1	0	1	1	0	1	1
332800	1	1	1	0	0	1	0	0.5	1
333200	1	1	1	0	0	1	1	1	1
333600	1	1	1	1	1	1	0	0	1
334000	1	1	1	1	1	1	1	1	1
334400	1	1	1	0	0.5	1	1	1	1
334800	1	1	1	0.25	1	1	1	1	1
335200	1	1	1	0	1	1	0	0.5	1
335600	1	1	1	0	0	0.75	1	1	1
336000	1	1	1	0.25	1	1	1	1	1
336400	1	1	1	0	0	1	0	1	1
336800	1	1	1	0	0.5	1	1	1	1
337200	1	1	1	0	0	0.75	1	1	1
337600	1	1	1	0	0.5	1	0.25	1	1
338000	1	1	1	0	0	0.75	0.25	1	1
338400	1	1	1	0.25	1	1	0	1	1
338800	1	1	1	0	0	0.75	0.25	1	1
339200	1	1	1	0	0	0.75	1	1	1
339600	1	1	1	0	1	1	1	1	1
340000	1	1	1	0	1	1	0.25	1	1
340400	1	1	1	0	1	1	1	1	1
340800	1	1	1	0	0	0.75	1	1	1
341200	1	1	1	1	1	1	0.25	1	1
341600	1	1	1	0	0	0.75	0.25	1	1
342000	1	1	1	0.25	1	1	0	0	0.75
342400	1	1	1	0	1	1	0	1	1
342800	1	1	1	0	0	1	0	1	1
343200	1	1	1	1	1	1	0.25	1	1
343600	1	1	1	0	0.5	1	1	1	1
344000	1	1	1	0	0	1	0.25	1	1
344400	1	1	1	0	1	1	1	1	1
344800	1	1	1	0	0	1	1	1	1
345200	1	1	1	0	0	0.75	1	1	1
345600	1	1	1	0	0.5	1	0	1	1
346000	1	1	1	0	0	1	1	1	1
346400	1	1	1	0	0	1	1	1	1
346800	1	1	1	0	0	0.75	1	1	1
347200	1	1	1	0	0.5	1	1	1	1
347600	1	1	1	0	0.5	1	1	1	1
348000	1	1	1	0.25	1	1	1	1	1
348400	1	1	1	0	0	1	1	1	1
348800	1	1	1	0.25	1	1	1	1	1
349200	1	1	1	0	0	0.75	0.25	1	1
349600	1	1	1	0	0.5	1	1	1	1
350000	1	1	1	0	0.5	1	1	1	1
350400	1	1	1	0	0	1	0.25	1	1
350800	1	1	1	0	0	0.75	1	1	1
351200	1	1	1	0	0	1	0	1	1
351600	1	1	1	0	1	1	1	1	1
352000	1	1	1	0	0.5	1	1	1	1
352400	1	1	1	0	0.5	1	1	1	1
352800	1	1	1	0	0	0	1	1	1
353200	1	1	1	0	0	0.75	1	1	1
353600	1	1	1	0	0.5	1	1	1	1
354000	1	1	1	0	0	0.75	0.25	1	1
354400	1	1	1	0	0	0	1	1	1
354800	1	1	1	0	0	0.75	1	1	1
355200	1	1	1	0	0	1	0	0.5	1
355600	1	1	1	0.25	1	1	0	0	0.75
356000	1	1	1	0	0	0.75	0	1	1
356400	1	1	1	0	0	0.75	0.25	1	1
356800	1	1	1	0	0.5	1	1	1	1
357200	1	1	1	0	1	1	1	1	1
357600	1	1	1	0	1	1	0.25	1	1
358000	1	1	1	0.25	1	1	1	1	1
358400	1	1	1	0	0.5	1	1	1	1
358800	1	1	1	0	1	1	1	1	1
359200	1	1	1	0	0.5	1	1	1	1
359600	1	1	1	0	0	1	1	1	1
360000	1	1	1	0	0	0	1	1	1
360400	1	1	1	0.25	1	1	1	1	1
360800	1	1	1	0	0.5	1	0	1	1
361200	1	1	1	0.25	1	1	1	1	1
361600	1	1	1	0	0	0.75	0	0.5	1
362000	1	1	1	0	1	1	0	1	1
362400	1	1	1	1	1	1	0.25	1	1
362800	1	1	1	0	0	1	0.25	1	1
363200	1	1	1	0	0	1	0	1	1
363600	1	1	1	1	1	1	1	1	1
364000	1	1	1	0	0	1	0.25	1	1
364400	1	1	1	0	0	1	1	1	1
364800	1	1	1	0	0.5	1	1	1	1
365200	1	1	1	0	0.5	1	0	1	1
365600	1	1	1	0.25	1	1	0.25	1	1
366000	1	1	1	0	0.5	1	1	1	1
366400	1	1	1	0	0.5	1	0.25	1	1
366800	1	1	1	0	1	1	0	0.5	1
367200	1	1	1	0	1	1	1	1	1
367600	1	1	1	0	1	1	1	1	1
368000	1	1	1	0	0	0	0	1	1
368400	1	1	1	0	1	1	1	1	1
368800	1	1	1	1	1	1	0	0	1
369200	1	1	1	0	0	1	0.25	1	1
369600	1	1	1	0	0	0.75	0.25	1	1
370000	1	1	1	0.25	1	1	1	1	1
370400	1	1	1	0	0	0.75	1	1	1
370800	1	1	1	0	0	0.75	1	1	1
371200	1	1	1	0	0.5	1	0.25	1	1
371600	1	1	1	0	0.5	1	1	1	1
372000	1	1	1	0	1	1	1	1	1
372400	1	1	1	0	0	0.75	1	1	1
372800	1	1	1	0	1	1	1	1	1
373200	1	1	1	0	0.5	1	1	1	1
373600	1	1	1	0	0.5	1	1	1	1
374000	1	1	1	0	1	1	0	1	1
374400	1	1	1	0	0	0.75	1	1	1
374800	1	1	1	0	0	0.75	0.25	1	1
375200	1	1	1	0	1	1	1	1	1
375600	1	1	1	0	1	1	1	1	1
376000	1	1	1	0	1	1	1	1	1
376400	1	1	1	1	1	1	0	1	1
376800	1	1	1	0	0	1	1	1	1
377200	1	1	1	0	0	1	0.25	1	1
377600	1	1	1	0.25	1	1	0	1	1
378000	1	1	1	0	0.5	1	1	1	1
378400	1	1	1	0	0	0.75	1	1	1
378800	1	1	1	0	0	1	1	1	1
379200	1	1	1	0	0.5	1	1	1	1
379600	1	1	1	0	1	1	1	1	1
380000	1	1	1	0	1	1	1	1	1
380400	1	1	1	0	1	1	0.25	1	1
380800	1	1	1	0	0	1	1	1	1
381200	1	1	1	0.25	1	1	1	1	1
381600	1	1	1	0	0.5	1	0.25	1	1
382000	1	1	1	0	0.5	1	1	1	1
382400	1	1	1	0	0	0.75	1	1	1
382800	1	1	1	0	0.5	1	0.25	1	1
383200	1	1	1	0	0	0.75	0.25	1	1
383600	1	1	1	0	0	0.75	1	1	1
384000	1	1	1	0	0.5	1	1	1	1
384400	1	1	1	0.25	1	1	1	1	1
384800	1	1	1	0	0	1	0	1	1
385200	1	1	1	0	0	1	0.25	1	1
385600	1	1	1	0	0	0.75	0.25	1	1
386000	1	1	1	0	0	0.75	1	1	1
386400	1	1	1	0	0.5	1	0.25	1	1
386800	1	1	1	0	1	1	1	1	1
387200	1	1	1	0	0	0	1	1	1
387600	1	1	1	0	0	0.75	1	1	1
388000	1	1	1	0	1	1	1	1	1
388400	1	1	1	0	0.5	1	1	1	1
388800	1	1	1	0	1	1	1	1	1
389200	1	1	1	0	0.5	1	1	1	1
389600	1	1	1	0	0	0	1	1	1
390000	1	1	1	0	0.5	1	0	0	1
390400	1	1	1	0.25	1	1	1	1	1
390800	1	1	1	0.25	1	1	1	1	1
391200	1	1	1	0	0	1	0.25	1	1
391600	1	1	1	0	1	1	0.25	1	1
392000	1	1	1	0	1	1	0.25	1	1
392400	1	1	1	0	0.5	1	1	1	1
392800	1	1	1	0	0	1	1	1	1
393200	1	1	1	0	0	0.75	1	1	1
393600	1	1	1	0	1	1	1	1	1
394000	1	1	1	0.25	1	1	1	1	1
394400	1	1	1	0.25	1	1	0.25	1	1
394800	1	1	1	0	0	1	1	1	1
395200	1	1	1	0	0.5	1	0.25	1	1
395600	1	1	1	0	0	0.75	1	1	1
396000	1	1	1	0	1	1	1	1	1
396400	1	1	1	0	1	1	1	1	1
396800	1	1	1	0	0.5	1	0	0.5	1
397200	1	1	1	0	1	1	0	1	1
397600	1	1	1	0	0.5	1	0.25	1	1
398000	1	1	1	0	0	1	0.25	1	1
398400	1	1	1	0	0.5	1	1	1	1
398800	1	1	1	0	1	1	1	1	1
399200	1	1	1	0.25	1	1	1	1	1
399600	1	1	1	0	0	0	1	1	1
400000	1	1	1	0	1	1	0	0.5	1

## Sheet: final percentiles
0	0	0	0	0	0	0	0	0	0
400	0	0	0	0	0	1	0	0	0
800	0	0	0	0	0	1	0	0	0
1200	0	0	0	0	0	0.666667	0	0	0
1600	0	0	0	0	0.125	0.75	0	0	0
2000	0	0	0	0	0.3	0.8	0	0	0
2400	0	0	0	0	0.416667	0.833333	0	0	0
2800	0	0	0	0	0.357143	0.821429	0	0	0
3200	0	0	0	0	0.3125	0.84375	0	0	0
3600	0	0	0	0.0277778	0.388889	0.861111	0	0	0
4000	0	0	0	0.025	0.35	0.775	0	0	0
4400	0	0	0	0.025	0.35	0.75	0	0	0
4800	0	0	0	0.025	0.35	0.725	0	0	0
5200	0	0	0	0.025	0.45	0.825	0	0	0
5600	0	0	0	0.125	0.5	0.825	0	0	0
6000	0	0	0	0.125	0.45	0.825	0	0	0
6400	0	0	0	0.125	0.35	0.725	0	0	0
6800	0	0	0	0.125	0.35	0.75	0	0	0
7200	0	0	0	0.125	0.45	0.75	0	0	0
7600	0	0	0	0.1	0.35	0.65	0	0	0
8000	0	0	0	0.1	0.4	0.75	0	0	0
8400	0	0	0	0.1	0.4	0.775	0	0	0
8800	0	0	0	0.1	0.4	0.8	0	0	0
9200	0	0	0	0.1	0.3	0.8	0	0	0.1
9600	0	0	0	0	0.25	0.8	0	0	0.1
10000	0	0	0	0	0.2	0.775	0	0	0.2
10400	0	0	0	0	0.25	0.875	0	0	0.3
10800	0	0	0	0	0.25	0.875	0	0	0.4
11200	0	0	0	0	0.2	0.875	0	0	0.4
11600	0	0	0	0	0.2	0.95	0	0	0.4
12000	0	0	0	0	0.15	0.95	0	0	0.4
12400	0	0	0	0	0.2	0.95	0	0	0.4
12800	0	0	0	0	0.2	0.95	0	0	0.4
13200	0	0	0	0	0.2	0.925	0	0.1	0.4
13600	0	0	0	0.025	0.25	0.925	0	0.15	0.5
14000	0	0	0	0.025	0.25	0.925	0	0.15	0.4
14400	0	0	0	0.025	0.2	0.9	0	0.2	0.4
14800	0	0	0	0.025	0.2	0.9	0	0.2	0.4
15200	0	0	0	0.025	0.15	0.9	0	0.2	0.5
15600	0	0	0	0.025	0.15	0.825	0	0.3	0.6
16000	0	0	0	0.025	0.15	0.825	0	0.3	0.6
16400	0	0	0	0.025	0.1	0.825	0	0.3	0.7
16800	0	0	0	0.025	0.1	0.825	0	0.35	0.8
17200	0	0	0	0.025	0.1	0.825	0	0.25	0.775
17600	0	0	0	0	0	0.825	0	0.2	0.75
18000	0	0	0	0	0.1	0.85	0	0.2	0.85
18400	0	0	0	0	0.1	0.85	0	0.15	0.75
18800	0	0	0	0	0.1	0.85	0	0.15	0.75
19200	0	0	0	0	0.15	0.85	0	0.15	0.75
19600	0	0	0	0	0.15	0.925	0	0.05	0.725
20000	0	0	0	0	0.2	0.925	0	0.1	0.825
20400	0	0	0	0	0.2	0.825	0	0.15	0.825
20800	0	0	0	0	0.3	0.825	0	0.1	0.825
21200	0	0	0	0.1	0.4	0.85	0	0.15	0.85
21600	0	0	0	0.1	0.45	0.85	0	0.15	0.875
22000	0	0	0	0.1	0.4	0.85	0	0.25	0.875
22400	0	0	0	0.1	0.4	0.875	0.025	0.35	0.975
22800	0	0	0	0.1	0.4	0.775	0.05	0.45	0.975
23200	0	0	0	0.1	0.35	0.75	0.05	0.5	0.975
23600	0	0	0	0.1	0.4	0.775	0.05	0.5	0.975
24000	0	0	0	0.1	0.4	0.775	0.05	0.55	0.975
24400	0	0	0	0.1	0.45	0.875	0.05	0.5	0.95
24800	0	0	0	0.1	0.35	0.775	0.05	0.55	0.95
25200	0	0	0	0	0.3	0.775	0.05	0.55	0.95
25600	0	0	0	0	0.3	0.775	0.05	0.55	0.95
26000	0	0	0	0	0.25	0.75	0.05	0.45	0.95
26400	0	0	0	0	0.25	0.75	0.025	0.45	0.95
26800	0	0	0.075	0	0.25	0.85	0	0.45	0.95
27200	0	0	0.075	0	0.25	0.775	0.1	0.5	0.95
27600	0	0	0.15	0	0.25	0.775	0.2	0.6	0.975
28000	0	0.05	0.25	0	0.3	0.775	0.2	0.5	0.975
28400	0	0.05	0.325	0	0.25	0.775	0.2	0.6	1
28800	0	0.05	0.325	0	0.25	0.85	0.2	0.65	1
29200	0	0.1	0.425	0	0.2	0.75	0.225	0.7	1
29600	0	0.1	0.5	0.025	0.25	0.75	0.325	0.8	1
30000	0	0.1	0.6	0.025	0.3	0.775	0.425	0.9	1
30400	0	0.1	0.6	0.125	0.4	0.775	0.425	0.85	1
30800	0	0.1	0.525	0.125	0.45	0.775	0.425	0.75	1
31200	0	0.1	0.525	0.125	0.45	0.85	0.325	0.75	1
31600	0	0.1	0.55	0.125	0.5	0.85	0.25	0.75	1
32000	0	0.05	0.55	0.125	0.45	0.85	0.25	0.85	1
32400	0	0.05	0.575	0.125	0.45	0.825	0.25	0.75	1
32800	0	0.05	0.675	0.125	0.45	0.825	0.25	0.7	1
33200	0	0.05	0.675	0.125	0.45	0.825	0.25	0.7	1
33600	0	0.1	0.7	0.1	0.4	0.825	0.25	0.7	1
34000	0	0.1	0.7	0.1	0.45	0.825	0.15	0.65	1
34400	0	0.15	0.8	0.1	0.45	0.825	0.15	0.7	1
34800	0	0.25	0.9	0.1	0.5	0.825	0.15	0.8	1
35200	0	0.3	1	0.1	0.6	0.85	0.25	0.8	1
35600	0	0.3	1	0.1	0.5	0.85	0.25	0.8	1
36000	0	0.35	1	0.1	0.45	0.85	0.25	0.7	0.975
36400	0	0.45	1	0.1	0.45	0.875	0.25	0.7	0.975
36800	0.1	0.55	1	0.1	0.45	0.875	0.25	0.7	0.975
37200	0.125	0.6	1	0.1	0.5	0.975	0.225	0.7	0.975
37600	0.125	0.65	1	0.1	0.5	0.975	0.125	0.65	0.975
38000	0.225	0.75	1	0.1	0.4	0.95	0.15	0.7	0.975
38400	0.325	0.8	1	0	0.35	0.95	0.15	0.7	0.975
38800	0.425	0.8	1	0	0.25	0.85	0.25	0.7	0.975
39200	0.425	0.85	1	0	0.2	0.85	0.25	0.7	0.975
39600	0.525	0.95	1	0	0.3	0.85	0.325	0.7	0.975
40000	0.525	1	1	0	0.35	0.85	0.425	0.8	1
40400	0.625	1	1	0	0.45	0.85	0.45	0.9	1
40800	0.55	1	1	0	0.45	0.875	0.45	0.9	1
41200	0.55	1	1	0	0.4	0.85	0.475	0.9	1
41600	0.65	1	1	0	0.4	0.85	0.575	0.95	1
42000	0.575	1	1	0	0.45	0.875	0.575	0.95	1
42400	0.575	1	1	0	0.45	0.875	0.6	0.95	1
42800	0.575	1	1	0	0.5	0.975	0.6	0.95	1
43200	0.6	1	1	0	0.45	0.975	0.6	0.95	1
43600	0.525	1	1	0	0.4	0.975	0.525	0.95	1
44000	0.625	1	1	0	0.35	0.975	0.525	0.95	1
44400	0.625	1	1	0	0.3	0.975	0.6	0.95	1
44800	0.7	1	1	0.025	0.4	0.975	0.6	0.95	1
45200	0.775	1	1	0.05	0.5	1	0.575	0.85	0.975
45600	0.775	1	1	0.15	0.55	1	0.575	0.85	0.975
46000	0.85	1	1	0.15	0.5	0.975	0.575	0.85	0.975
46400	0.85	1	1	0.15	0.5	0.975	0.575	0.85	0.975
46800	0.85	1	1	0.15	0.55	0.975	0.5	0.85	0.975
47200	0.925	1	1	0.15	0.6	0.975	0.5	0.85	0.975
47600	1	1	1	0.15	0.55	0.975	0.575	0.85	0.975
48000	1	1	1	0.15	0.55	0.975	0.575	0.85	0.975
48400	1	1	1	0.15	0.5	0.95	0.575	0.85	0.975
48800	1	1	1	0.125	0.45	0.95	0.675	0.9	0.975
49200	1	1	1	0.1	0.45	0.95	0.7	1	1
49600	1	1	1	0	0.35	0.925	0.625	1	1
50000	1	1	1	0	0.35	0.95	0.625	1	1
50400	1	1	1	0	0.3	0.925	0.7	1	1
50800	1	1	1	0	0.2	0.825	0.7	1	1
51200	1	1	1	0	0.25	0.825	0.7	1	1
51600	1	1	1	0	0.25	0.8	0.7	1	1
52000	1	1	1	0	0.25	0.775	0.6	1	1
52400	1	1	1	0	0.25	0.7	0.6	1	1
52800	1	1	1	0	0.25	0.7	0.525	1	1
53200	1	1	1	0	0.15	0.675	0.525	1	1
53600	1	1	1	0	0.2	0.7	0.525	1	1
54000	1	1	1	0	0.2	0.675	0.5	1	1
54400	1	1	1	0.1	0.3	0.7	0.5	1	1
54800	1	1	1	0.1	0.3	0.8	0.575	1	1
55200	1	1	1	0.1	0.25	0.8	0.575	1	1
55600	1	1	1	0.1	0.35	0.825	0.475	1	1
56000	1	1	1	0.1	0.35	0.825	0.475	1	1
56400	1	1	1	0.1	0.4	0.925	0.375	1	1
56800	1	1	1	0.1	0.35	0.925	0.375	1	1
57200	1	1	1	0.125	0.45	0.95	0.45	1	1
57600	1	1	1	0.125	0.45	0.95	0.45	1	1
58000	1	1	1	0.125	0.45	0.975	0.45	1	1
58400	1	1	1	0.025	0.35	0.975	0.35	0.95	1
58800	1	1	1	0.125	0.45	0.975	0.35	0.95	1
59200	1	1	1	0.125	0.4	0.875	0.35	0.95	1
59600	1	1	1	0.125	0.3	0.85	0.35	0.95	1
60000	1	1	1	0.125	0.35	0.875	0.45	0.95	1
60400	1	1	1	0.125	0.3	0.775	0.55	0.95	1
60800	1	1	1	0.125	0.3	0.775	0.625	0.95	1
61200	1	1	1	0.1	0.2	0.775	0.625	0.95	1
61600	1	1	1	0.1	0.15	0.775	0.7	0.95	1
62000	1	1	1	0.1	0.15	0.775	0.725	0.95	1
62400	1	1	1	0.1	0.15	0.75	0.75	1	1
62800	1	1	1	0	0.15	0.75	0.75	1	1
63200	1	1	1	0	0.25	0.85	0.75	1	1
63600	1	1	1	0	0.3	0.875	0.85	1	1
64000	1	1	1	0	0.25	0.875	0.775	1	1
64400	1	1	1	0	0.3	0.975	0.675	1	1
64800	1	1	1	0	0.4	0.975	0.575	1	1
65200	1	1	1	0	0.5	0.975	0.575	1	1
65600	1	1	1	0.025	0.6	0.975	0.575	1	1
66000	1	1	1	0.05	0.7	0.975	0.65	1	1
66400	1	1	1	0.05	0.7	0.975	0.725	1	1
66800	1	1	1	0.05	0.7	0.975	0.725	1	1
67200	1	1	1	0.05	0.7	0.975	0.725	1	1
67600	1	1	1	0.05	0.75	0.975	0.625	1	1
68000	1	1	1	0.05	0.75	0.975	0.7	1	1
68400	1	1	1	0.05	0.75	0.975	0.7	1	1
68800	1	1	1	0.05	0.65	0.975	0.8	1	1
69200	1	1	1	0.05	0.55	0.975	0.8	1	1
69600	1	1	1	0.025	0.45	0.975	0.7	1	1
70000	1	1	1	0	0.35	0.975	0.7	1	1
70400	1	1	1	0	0.4	1	0.7	1	1
70800	1	1	1	0	0.3	1	0.6	1	1
71200	1	1	1	0	0.25	1	0.5	1	1
71600	1	1	1	0	0.15	1	0.5	1	1
72000	1	1	1	0	0.15	1	0.5	1	1
72400	1	1	1	0	0.15	1	0.525	1	1
72800	1	1	1	0	0.15	0.9	0.525	1	1
73200	1	1	1	0	0.15	0.9	0.425	1	1
73600	1	1	1	0	0.15	0.875	0.525	1	1
74000	1	1	1	0	0.15	0.775	0.525	1	1
74400	1	1	1	0.1	0.2	0.775	0.525	1	1
74800	1	1	1	0.1	0.3	0.775	0.625	1	1
75200	1	1	1	0.1	0.25	0.775	0.65	1	1
75600	1	1	1	0.1	0.25	0.775	0.65	1	1
76000	1	1	1	0.1	0.25	0.775	0.65	1	1
76400	1	1	1	0.1	0.2	0.675	0.725	1	1
76800	1	1	1	0.1	0.25	0.775	0.625	1	1
77200	1	1	1	0.1	0.3	0.775	0.725	1	1
77600	1	1	1	0.1	0.3	0.8	0.725	1	1
78000	1	1	1	0.1	0.3	0.8	0.65	1	1
78400	1	1	1	0	0.2	0.775	0.575	1	1
78800	1	1	1	0.025	0.2	0.775	0.475	0.95	1
79200	1	1	1	0.125	0.3	0.775	0.55	0.95	1
79600	1	1	1	0.125	0.35	0.775	0.575	0.95	1
80000	1	1	1	0.125	0.45	0.775	0.575	0.95	1
80400	1	1	1	0.125	0.45	0.85	0.5	0.95	1
80800	1	1	1	0.125	0.4	0.75	0.6	0.95	1
81200	1	1	1	0.125	0.45	0.75	0.525	0.95	1
81600	1	1	1	0.125	0.55	0.75	0.425	0.95	1
82000	1	1	1	0.125	0.65	0.85	0.4	0.95	1
82400	1	1	1	0.125	0.7	0.875	0.375	0.95	1
82800	1	1	1	0.125	0.7	0.875	0.475	1	1
83200	1	1	1	0.025	0.6	0.875	0.475	1	1
83600	1	1	1	0.025	0.55	0.85	0.55	1	1
84000	1	1	1	0.025	0.45	0.825	0.55	1	1
84400	1	1	1	0.025	0.45	0.85	0.55	1	1
84800	1	1	1	0.05	0.55	0.95	0.55	1	1
85200	1	1	1	0.05	0.5	0.95	0.525	1	1
85600	1	1	1	0.05	0.4	0.925	0.525	1	1
86000	1	1	1	0.05	0.3	0.925	0.625	1	1
86400	1	1	1	0.15	0.35	0.925	0.725	1	1
86800	1	1	1	0.125	0.3	0.925	0.725	1	1
87200	1	1	1	0.225	0.4	0.925	0.725	1	1
87600	1	1	1	0.25	0.5	0.95	0.725	1	1
88000	1	1	1	0.25	0.5	0.875	0.725	1	1
88400	1	1	1	0.25	0.5	0.875	0.725	1	1
88800	1	1	1	0.225	0.4	0.85	0.625	0.9	1
89200	1	1	1	0.225	0.35	0.825	0.725	0.9	1
89600	1	1	1	0.325	0.45	0.85	0.825	0.9	1
90000	1	1	1	0.425	0.55	0.85	0.825	0.9	1
90400	1	1	1	0.35	0.55	0.85	0.825	0.9	1
90800	1	1	1	0.35	0.5	0.85	0.825	0.9	1
91200	1	1	1	0.25	0.4	0.825	0.825	0.9	1
91600	1	1	1	0.225	0.3	0.8	0.825	0.9	1
92000	1	1	1	0.325	0.4	0.9	0.75	0.9	1
92400	1	1	1	0.325	0.4	0.8	0.75	0.9	1
92800	1	1	1	0.325	0.4	0.8	0.775	1	1
93200	1	1	1	0.325	0.5	0.825	0.7	1	1
93600	1	1	1	0.225	0.4	0.8	0.7	1	1
94000	1	1	1	0.125	0.3	0.775	0.625	1	1
94400	1	1	1	0.1	0.3	0.775	0.625	1	1
94800	1	1	1	0.1	0.3	0.75	0.625	1	1
95200	1	1	1	0.1	0.4	0.775	0.55	1	1
95600	1	1	1	0.1	0.4	0.775	0.55	1	1
96000	1	1	1	0	0.35	0.775	0.625	1	1
96400	1	1	1	0	0.35	0.85	0.6	1	1
96800	1	1	1	0	0.35	0.875	0.675	1	1
97200	1	1	1	0	0.25	0.875	0.75	1	1
97600	1	1	1	0	0.25	0.8	0.65	1	1
98000	1	1	1	0.1	0.35	0.825	0.65	1	1
98400	1	1	1	0.1	0.3	0.825	0.65	1	1
98800	1	1	1	0.1	0.3	0.75	0.55	0.95	1
99200	1	1	1	0.1	0.2	0.75	0.55	0.95	1
99600	1	1	1	0.1	0.2	0.75	0.45	0.95	1
100000	1	1	1	0.1	0.15	0.725	0.35	0.95	1
100400	1	1	1	0.1	0.25	0.75	0.35	0.95	1
100800	1	1	1	0.1	0.25	0.75	0.275	0.95	1
101200	1	1	1	0.1	0.25	0.75	0.2	0.95	1
101600	1	1	1	0.1	0.25	0.85	0.3	0.95	1
102000	1	1	1	0	0.15	0.825	0.375	0.95	1
102400	1	1	1	0	0.2	0.825	0.375	0.95	1
102800	1	1	1	0	0.2	0.925	0.475	1	1
103200	1	1	1	0	0.3	0.925	0.475	1	1
103600	1	1	1	0	0.3	0.95	0.5	1	1
104000	1	1	1	0.025	0.4	0.975	0.5	1	1
104400	1	1	1	0.025	0.4	0.975	0.5	1	1
104800	1	1	1	0.025	0.4	0.95	0.5	1	1
105200	1	1	1	0.025	0.4	0.95	0.5	1	1
105600	1	1	1	0.025	0.4	0.95	0.5	1	1
106000	1	1	1	0.025	0.4	0.875	0.5	1	1
106400	1	1	1	0.025	0.3	0.85	0.5	1	1
106800	1	1	1	0.025	0.3	0.85	0.4	0.95	1
107200	1	1	1	0.025	0.25	0.85	0.475	0.95	1
107600	1	1	1	0.025	0.3	0.85	0.55	0.95	1
108000	1	1	1	0	0.2	0.85	0.55	0.95	1
108400	1	1	1	0	0.15	0.85	0.65	0.95	1
108800	1	1	1	0	0.15	0.85	0.65	0.95	1
109200	1	1	1	0	0.15	0.85	0.65	0.95	1
109600	1	1	1	0	0.15	0.75	0.65	0.95	1
110000	1	1	1	0	0.15	0.825	0.65	0.95	1
110400	1	1	1	0	0.2	0.85	0.65	0.95	1
110800	1	1	1	0	0.25	0.85	0.75	1	1
111200	1	1	1	0	0.3	0.85	0.75	1	1
111600	1	1	1	0	0.35	0.85	0.65	0.95	1
112000	1	1	1	0	0.35	0.85	0.675	0.95	1
112400	1	1	1	0	0.4	0.85	0.675	0.95	1
112800	1	1	1	0	0.5	0.875	0.675	0.95	1
113200	1	1	1	0	0.5	0.875	0.675	0.95	1
113600	1	1	1	0	0.5	0.975	0.6	0.95	1
114000	1	1	1	0	0.5	0.9	0.525	0.95	1
114400	1	1	1	0	0.45	0.9	0.45	0.95	1
114800	1	1	1	0	0.4	0.8	0.45	0.95	1
115200	1	1	1	0	0.3	0.8	0.375	0.95	1
115600	1	1	1	0	0.2	0.775	0.4	1	1
116000	1	1	1	0	0.25	0.775	0.475	1	1
116400	1	1	1	0	0.15	0.775	0.475	1	1
116800	1	1	1	0	0.15	0.775	0.55	1	1
117200	1	1	1	0	0.2	0.775	0.625	1	1
117600	1	1	1	0	0.25	0.775	0.7	1	1
118000	1	1	1	0	0.25	0.775	0.775	1	1
118400	1	1	1	0	0.25	0.75	0.75	1	1
118800	1	1	1	0	0.35	0.85	0.75	1	1
119200	1	1	1	0	0.35	0.825	0.725	1	1
119600	1	1	1	0	0.4	0.85	0.8	1	1
120000	1	1	1	0.025	0.45	0.85	0.7	1	1
120400	1	1	1	0.025	0.45	0.85	0.625	1	1
120800	1	1	1	0.025	0.35	0.85	0.55	1	1
121200	1	1	1	0.025	0.4	0.85	0.55	1	1
121600	1	1	1	0.025	0.35	0.825	0.55	1	1
122000	1	1	1	0.025	0.35	0.825	0.55	1	1
122400	1	1	1	0.025	0.35	0.85	0.575	1	1
122800	1	1	1	0.025	0.35	0.85	0.475	1	1
123200	1	1	1	0.025	0.35	0.875	0.575	1	1
123600	1	1	1	0.025	0.3	0.775	0.575	1	1
124000	1	1	1	0.025	0.3	0.775	0.675	1	1
124400	1	1	1	0.025	0.35	0.775	0.675	1	1
124800	1	1	1	0.025	0.35	0.75	0.75	1	1
125200	1	1	1	0.05	0.35	0.75	0.75	1	1
125600	1	1	1	0.05	0.4	0.775	0.75	1	1
126000	1	1	1	0.05	0.4	0.85	0.675	1	1
126400	1	1	1	0.05	0.4	0.85	0.75	1	1
126800	1	1	1	0.075	0.4	0.85	0.775	1	1
127200	1	1	1	0.075	0.4	0.825	0.775	1	1
127600	1	1	1	0.075	0.4	0.825	0.675	1	1
128000	1	1	1	0.05	0.3	0.825	0.6	1	1
128400	1	1	1	0.05	0.35	0.825	0.575	1	1
128800	1	1	1	0.05	0.45	0.85	0.575	1	1
129200	1	1	1	0.025	0.45	0.85	0.475	1	1
129600	1	1	1	0.025	0.45	0.85	0.475	1	1
130000	1	1	1	0.025	0.55	0.875	0.55	1	1
130400	1	1	1	0.025	0.55	0.875	0.45	1	1
130800	1	1	1	0	0.5	0.875	0.45	1	1
131200	1	1	1	0	0.55	0.9	0.45	1	1
131600	1	1	1	0.025	0.65	1	0.475	1	1
132000	1	1	1	0.025	0.65	0.975	0.475	1	1
132400	1	1	1	0.025	0.65	0.975	0.575	1	1
132800	1	1	1	0.025	0.55	0.975	0.5	1	1
133200	1	1	1	0.025	0.45	0.975	0.6	1	1
133600	1	1	1	0.025	0.4	0.95	0.6	1	1
134000	1	1	1	0.025	0.35	0.95	0.525	1	1
134400	1	1	1	0.025	0.35	0.95	0.625	1	1
134800	1	1	1	0.025	0.3	0.95	0.6	1	1
135200	1	1	1	0.025	0.3	0.95	0.525	1	1
135600	1	1	1	0	0.3	0.95	0.6	1	1
136000	1	1	1	0	0.4	0.975	0.675	1	1
136400	1	1	1	0	0.3	0.975	0.575	1	1
136800	1	1	1	0	0.35	0.975	0.575	1	1
137200	1	1	1	0	0.4	0.975	0.575	1	1
137600	1	1	1	0	0.4	1	0.475	0.95	1
138000	1	1	1	0	0.45	1	0.475	0.95	1
138400	1	1	1	0	0.45	0.9	0.475	0.95	1
138800	1	1	1	0	0.45	0.9	0.475	0.9	1
139200	1	1	1	0	0.5	0.9	0.45	0.9	1
139600	1	1	1	0	0.4	0.8	0.45	0.9	1
140000	1	1	1	0	0.4	0.8	0.45	0.9	1
140400	1	1	1	0	0.5	0.8	0.475	0.9	1
140800	1	1	1	0	0.45	0.775	0.475	0.9	1
141200	1	1	1	0	0.5	0.775	0.4	0.9	1
141600	1	1	1	0	0.6	0.775	0.425	0.95	1
142000	1	1	1	0	0.5	0.775	0.5	0.95	1
142400	1	1	1	0	0.5	0.775	0.5	0.95	1
142800	1	1	1	0	0.5	0.675	0.6	1	1
143200	1	1	1	0	0.45	0.675	0.625	1	1
143600	1	1	1	0	0.45	0.775	0.625	1	1
144000	1	1	1	0.025	0.45	0.775	0.625	1	1
144400	1	1	1	0.025	0.45	0.775	0.7	1	1
144800	1	1	1	0.025	0.45	0.8	0.775	1	1
145200	1	1	1	0.025	0.35	0.8	0.85	1	1
145600	1	1	1	0.025	0.3	0.8	0.85	1	1
146000	1	1	1	0.025	0.3	0.8	0.775	1	1
146400	1	1	1	0.025	0.4	0.9	0.7	1	1
146800	1	1	1	0.025	0.45	1	0.7	1	1
147200	1	1	1	0.025	0.45	1	0.7	1	1
147600	1	1	1	0.025	0.5	1	0.625	1	1
148000	1	1	1	0	0.5	1	0.55	1	1
148400	1	1	1	0	0.45	1	0.55	1	1
148800	1	1	1	0	0.45	1	0.475	1	1
149200	1	1	1	0	0.55	1	0.375	1	1
149600	1	1	1	0	0.55	1	0.35	1	1
150000	1	1	1	0	0.6	1	0.425	1	1
150400	1	1	1	0	0.55	1	0.425	1	1
150800	1	1	1	0	0.55	1	0.425	1	1
151200	1	1	1	0	0.5	1	0.5	1	1
151600	1	1	1	0	0.45	1	0.575	1	1
152000	1	1	1	0	0.35	0.975	0.55	0.95	1
152400	1	1	1	0	0.4	0.975	0.55	0.95	1
152800	1	1	1	0	0.4	0.875	0.625	0.95	1
153200	1	1	1	0	0.35	0.875	0.65	0.95	1
153600	1	1	1	0	0.4	0.875	0.75	0.95	1
154000	1	1	1	0	0.35	0.85	0.75	0.95	1
154400	1	1	1	0	0.3	0.825	0.725	0.95	1
154800	1	1	1	0.025	0.35	0.825	0.725	0.95	1
155200	1	1	1	0.05	0.45	0.825	0.725	0.95	1
155600	1	1	1	0.075	0.55	0.825	0.65	0.95	1
156000	1	1	1	0.075	0.65	0.85	0.75	1	1
156400	1	1	1	0.075	0.6	0.85	0.75	1	1
156800	1	1	1	0.075	0.6	0.925	0.75	1	1
157200	1	1	1	0.075	0.6	0.925	0.825	1	1
157600	1	1	1	0.075	0.5	0.925	0.825	1	1
158000	1	1	1	0.1	0.6	0.95	0.75	1	1
158400	1	1	1	0.125	0.7	0.975	0.85	1	1
158800	1	1	1	0.1	0.7	0.975	0.85	1	1
159200	1	1	1	0.075	0.6	0.95	0.85	1	1
159600	1	1	1	0.075	0.6	0.95	0.85	1	1
160000	1	1	1	0.075	0.5	0.95	0.85	1	1
160400	1	1	1	0.075	0.5	0.95	0.85	1	1
160800	1	1	1	0.075	0.5	0.975	0.85	1	1
161200	1	1	1	0.075	0.45	0.875	0.85	1	1
161600	1	1	1	0.075	0.5	0.875	0.85	1	1
162000	1	1	1	0.05	0.4	0.875	0.925	1	1
162400	1	1	1	0.025	0.4	0.875	0.925	1	1
162800	1	1	1	0.05	0.4	0.875	0.925	1	1
163200	1	1	1	0.15	0.5	0.9	0.85	1	1
163600	1	1	1	0.125	0.5	0.9	0.925	1	1
164000	1	1	1	0.125	0.6	0.9	0.825	0.95	1
164400	1	1	1	0.15	0.65	0.9	0.725	0.95	1
164800	1	1	1	0.15	0.75	0.9	0.725	0.95	1
165200	1	1	1	0.25	0.85	1	0.725	0.95	1
165600	1	1	1	0.25	0.85	1	0.725	0.95	1
166000	1	1	1	0.25	0.85	1	0.725	0.95	1
166400	1	1	1	0.275	0.85	1	0.725	0.95	1
166800	1	1	1	0.25	0.85	1	0.725	0.95	1
167200	1	1	1	0.15	0.75	1	0.7	0.95	1
167600	1	1	1	0.15	0.75	1	0.625	0.95	1
168000	1	1	1	0.175	0.75	1	0.725	1	1
168400	1	1	1	0.15	0.7	1	0.825	1	1
168800	1	1	1	0.15	0.6	0.9	0.825	1	1
169200	1	1	1	0.05	0.55	0.9	0.825	1	1
169600	1	1	1	0.05	0.6	0.9	0.825	1	1
170000	1	1	1	0.05	0.7	0.9	0.825	1	1
170400	1	1	1	0.05	0.7	0.9	0.825	1	1
170800	1	1	1	0.05	0.65	0.9	0.75	1	1
171200	1	1	1	0.15	0.75	0.9	0.85	1	1
171600	1	1	1	0.15	0.75	0.9	0.925	1	1
172000	1	1	1	0.125	0.65	0.8	0.925	1	1
172400	1	1	1	0.125	0.6	0.8	0.925	1	1
172800	1	1	1	0.15	0.7	0.9	0.825	0.9	1
173200	1	1	1	0.15	0.65	0.875	0.825	0.9	1
173600	1	1	1	0.15	0.6	0.875	0.725	0.85	1
174000	1	1	1	0.175	0.6	0.875	0.725	0.85	1
174400	1	1	1	0.15	0.6	0.875	0.65	0.85	1
174800	1	1	1	0.175	0.65	0.875	0.65	0.85	1
175200	1	1	1	0.075	0.55	0.85	0.55	0.85	1
175600	1	1	1	0.075	0.55	0.85	0.45	0.8	1
176000	1	1	1	0.075	0.55	0.925	0.35	0.8	1
176400	1	1	1	0.175	0.65	0.925	0.35	0.8	1
176800	1	1	1	0.15	0.6	0.925	0.375	0.9	1
177200	1	1	1	0.15	0.65	0.95	0.3	0.9	1
177600	1	1	1	0.15	0.65	0.95	0.3	0.95	1
178000	1	1	1	0.125	0.55	0.95	0.225	0.95	1
178400	1	1	1	0.125	0.45	0.95	0.3	0.95	1
178800	1	1	1	0.1	0.35	0.85	0.375	0.95	1
179200	1	1	1	0.1	0.4	0.875	0.475	0.95	1
179600	1	1	1	0.1	0.4	0.875	0.575	1	1
180000	1	1	1	0.1	0.4	0.9	0.6	1	1
180400	1	1	1	0.025	0.4	0.9	0.5	0.9	1
180800	1	1	1	0.025	0.45	0.9	0.575	0.9	1
181200	1	1	1	0.025	0.45	0.9	0.55	0.9	1
181600	1	1	1	0.05	0.5	0.9	0.65	0.9	1
182000	1	1	1	0.05	0.6	0.9	0.725	0.9	1
182400	1	1	1	0.075	0.7	0.9	0.65	0.9	1
182800	1	1	1	0.075	0.7	1	0.65	0.9	1
183200	1	1	1	0.1	0.75	1	0.65	0.9	1
183600	1	1	1	0.1	0.7	1	0.575	0.9	1
184000	1	1	1	0.1	0.75	1	0.575	0.9	1
184400	1	1	1	0.075	0.65	1	0.6	1	1
184800	1	1	1	0.075	0.55	0.975	0.6	1	1
185200	1	1	1	0.075	0.6	0.975	0.7	1	1
185600	1	1	1	0.05	0.6	0.975	0.7	1	1
186000	1	1	1	0.05	0.55	0.975	0.7	1	1
186400	1	1	1	0.025	0.55	0.975	0.7	1	1
186800	1	1	1	0.025	0.55	0.875	0.7	1	1
187200	1	1	1	0	0.45	0.85	0.7	1	1
187600	1	1	1	0	0.45	0.85	0.775	1	1
188000	1	1	1	0	0.5	0.85	0.775	1	1
188400	1	1	1	0	0.5	0.85	0.85	1	1
188800	1	1	1	0	0.6	0.875	0.85	1	1
189200	1	1	1	0	0.5	0.85	0.85	1	1
189600	1	1	1	0	0.4	0.75	0.75	1	1
190000	1	1	1	0	0.35	0.75	0.675	1	1
190400	1	1	1	0.025	0.35	0.75	0.75	1	1
190800	1	1	1	0.025	0.45	0.85	0.75	1	1
191200	1	1	1	0.025	0.5	0.875	0.675	1	1
191600	1	1	1	0.025	0.45	0.775	0.675	1	1
192000	1	1	1	0.025	0.35	0.75	0.65	1	1
192400	1	1	1	0.025	0.45	0.75	0.65	1	1
192800	1	1	1	0.025	0.4	0.75	0.65	1	1
193200	1	1	1	0.025	0.45	0.775	0.65	1	1
193600	1	1	1	0.025	0.55	0.875	0.75	1	1
194000	1	1	1	0.025	0.55	0.875	0.825	1	1
194400	1	1	1	0	0.45	0.875	0.825	1	1
194800	1	1	1	0.025	0.45	0.875	0.75	1	1
195200	1	1	1	0.025	0.4	0.85	0.75	1	1
195600	1	1	1	0.025	0.45	0.95	0.65	0.9	1
196000	1	1	1	0.05	0.55	0.975	0.75	0.9	1
196400	1	1	1	0.05	0.45	0.975	0.75	0.9	1
196800	1	1	1	0.05	0.4	0.975	0.75	0.9	1
197200	1	1	1	0.15	0.45	0.975	0.75	0.9	1
197600	1	1	1	0.15	0.4	0.975	0.75	0.9	1
198000	1	1	1	0.15	0.4	0.975	0.75	0.9	1
198400	1	1	1	0.15	0.45	0.975	0.75	0.9	1
198800	1	1	1	0.225	0.45	0.975	0.75	0.9	1
199200	1	1	1	0.225	0.45	0.975	0.825	0.9	1
199600	1	1	1	0.225	0.45	0.975	0.925	1	1
200000	1	1	1	0.2	0.35	0.975	0.85	1	1
200400	1	1	1	0.2	0.35	0.975	0.75	1	1
200800	1	1	1	0.2	0.45	0.975	0.75	1	1
201200	1	1	1	0.1	0.4	0.975	0.675	1	1
201600	1	1	1	0.1	0.4	0.975	0.675	1	1
202000	1	1	1	0.125	0.5	0.975	0.675	1	1
202400	1	1	1	0.125	0.5	0.975	0.6	1	1
202800	1	1	1	0.025	0.5	0.975	0.675	1	1
203200	1	1	1	0.025	0.55	1	0.675	1	1
203600	1	1	1	0.025	0.5	0.9	0.675	1	1
204000	1	1	1	0.025	0.55	0.9	0.675	1	1
204400	1	1	1	0.025	0.6	0.9	0.7	1	1
204800	1	1	1	0.025	0.5	0.875	0.7	1	1
205200	1	1	1	0.05	0.55	0.875	0.775	1	1
205600	1	1	1	0.05	0.5	0.875	0.775	1	1
206000	1	1	1	0.025	0.4	0.775	0.775	1	1
206400	1	1	1	0.025	0.4	0.775	0.75	1	1
206800	1	1	1	0.025	0.3	0.675	0.75	1	1
207200	1	1	1	0.025	0.3	0.675	0.75	1	1
207600	1	1	1	0.025	0.35	0.775	0.75	1	1
208000	1	1	1	0.025	0.4	0.775	0.825	1	1
208400	1	1	1	0.025	0.35	0.775	0.9	1	1
208800	1	1	1	0.025	0.45	0.8	0.9	1	1
209200	1	1	1	0	0.35	0.8	0.8	1	1
209600	1	1	1	0	0.45	0.8	0.725	1	1
210000	1	1	1	0	0.55	0.9	0.725	1	1
210400	1	1	1	0.1	0.6	0.9	0.825	1	1
210800	1	1	1	0.1	0.6	1	0.75	1	1
211200	1	1	1	0.1	0.55	0.975	0.675	1	1
211600	1	1	1	0.1	0.6	0.975	0.675	1	1
212000	1	1	1	0.1	0.5	0.975	0.6	1	1
212400	1	1	1	0.1	0.6	0.975	0.6	1	1
212800	1	1	1	0.125	0.6	0.975	0.6	1	1
213200	1	1	1	0.15	0.7	0.975	0.7	1	1
213600	1	1	1	0.15	0.7	0.975	0.775	1	1
214000	1	1	1	0.15	0.65	0.975	0.775	1	1
214400	1	1	1	0.05	0.55	0.975	0.775	1	1
214800	1	1	1	0.05	0.6	0.975	0.85	1	1
215200	1	1	1	0.05	0.7	1	0.925	1	1
215600	1	1	1	0.075	0.7	1	0.825	1	1
216000	1	1	1	0.075	0.75	1	0.9	1	1
216400	1	1	1	0.175	0.75	1	0.9	1	1
216800	1	1	1	0.15	0.7	1	0.8	1	1
217200	1	1	1	0.125	0.6	0.975	0.8	1	1
217600	1	1	1	0.125	0.55	0.975	0.8	1	1
218000	1	1	1	0.225	0.6	0.975	0.8	1	1
218400	1	1	1	0.225	0.6	0.95	0.7	1	1
218800	1	1	1	0.225	0.6	0.95	0.7	1	1
219200	1	1	1	0.225	0.5	0.95	0.7	1	1
219600	1	1	1	0.2	0.5	0.95	0.8	1	1
220000	1	1	1	0.225	0.55	0.95	0.725	1	1
220400	1	1	1	0.125	0.45	0.925	0.725	1	1
220800	1	1	1	0.125	0.45	0.925	0.725	1	1
221200	1	1	1	0.125	0.5	0.95	0.725	1	1
221600	1	1	1	0.125	0.5	0.95	0.65	1	1
222000	1	1	1	0.025	0.5	0.95	0.575	1	1
222400	1	1	1	0.025	0.6	0.975	0.675	1	1
222800	1	1	1	0.025	0.65	0.975	0.6	1	1
223200	1	1	1	0.025	0.75	0.975	0.6	1	1
223600	1	1	1	0.025	0.75	0.975	0.6	1	1
224000	1	1	1	0	0.65	0.95	0.675	1	1
224400	1	1	1	0	0.65	0.875	0.675	1	1
224800	1	1	1	0	0.6	0.875	0.675	1	1
225200	1	1	1	0	0.55	0.875	0.575	1	1
225600	1	1	1	0	0.6	0.875	0.575	1	1
226000	1	1	1	0	0.5	0.875	0.575	1	1
226400	1	1	1	0	0.45	0.875	0.5	1	1
226800	1	1	1	0	0.45	0.875	0.475	1	1
227200	1	1	1	0	0.45	0.875	0.475	1	1
227600	1	1	1	0	0.4	0.875	0.475	1	1
228000	1	1	1	0.025	0.5	0.9	0.375	0.95	1
228400	1	1	1	0.05	0.6	1	0.375	0.95	1
228800	1	1	1	0.05	0.6	0.9	0.475	0.95	1
229200	1	1	1	0.05	0.6	0.875	0.5	0.95	1
229600	1	1	1	0.05	0.6	0.875	0.475	0.95	1
230000	1	1	1	0.05	0.6	0.875	0.475	0.95	1
230400	1	1	1	0.05	0.6	0.875	0.55	0.95	1
230800	1	1	1	0.05	0.55	0.875	0.65	0.95	1
231200	1	1	1	0.05	0.45	0.85	0.55	0.95	1
231600	1	1	1	0.05	0.45	0.85	0.55	0.95	1
232000	1	1	1	0.05	0.45	0.85	0.65	1	1
232400	1	1	1	0.025	0.4	0.85	0.575	1	1
232800	1	1	1	0.025	0.4	0.95	0.575	1	1
233200	1	1	1	0.025	0.45	0.975	0.65	1	1
233600	1	1	1	0.025	0.35	0.975	0.75	1	1
234000	1	1	1	0.025	0.45	0.975	0.75	1	1
234400	1	1	1	0.025	0.4	0.975	0.675	1	1
234800	1	1	1	0.025	0.4	0.975	0.575	0.95	1
235200	1	1	1	0.025	0.4	1	0.675	0.95	1
235600	1	1	1	0.025	0.35	0.9	0.6	0.95	1
236000	1	1	1	0	0.25	0.875	0.5	0.95	1
236400	1	1	1	0	0.25	0.875	0.5	0.95	1
236800	1	1	1	0	0.35	0.875	0.425	0.95	1
237200	1	1	1	0	0.3	0.875	0.425	0.95	1
237600	1	1	1	0	0.3	0.875	0.425	0.95	1
238000	1	1	1	0.1	0.3	0.875	0.5	0.95	1
238400	1	1	1	0.2	0.4	0.875	0.575	0.95	1
238800	1	1	1	0.225	0.45	0.875	0.675	1	1
239200	1	1	1	0.225	0.5	0.875	0.575	0.95	1
239600	1	1	1	0.225	0.5	0.95	0.65	0.95	1
240000	1	1	1	0.225	0.5	0.875	0.65	0.95	1
240400	1	1	1	0.225	0.5	0.875	0.725	0.95	1
240800	1	1	1	0.225	0.4	0.875	0.8	0.95	1
241200	1	1	1	0.225	0.45	0.875	0.7	0.9	1
241600	1	1	1	0.225	0.55	0.875	0.625	0.9	1
242000	1	1	1	0.125	0.55	0.875	0.625	0.9	1
242400	1	1	1	0.025	0.5	0.875	0.625	0.9	1
242800	1	1	1	0	0.45	0.875	0.625	0.9	1
243200	1	1	1	0	0.45	0.875	0.725	0.95	1
243600	1	1	1	0	0.45	0.9	0.625	0.85	1
244000	1	1	1	0	0.55	1	0.625	0.75	1
244400	1	1	1	0	0.55	1	0.625	0.75	1
244800	1	1	1	0	0.65	1	0.625	0.75	1
245200	1	1	1	0	0.65	1	0.725	0.8	1
245600	1	1	1	0	0.6	1	0.8	0.8	1
246000	1	1	1	0	0.5	1	0.8	0.8	1
246400	1	1	1	0	0.5	1	0.8	0.8	1
246800	1	1	1	0	0.5	1	0.8	0.8	1
247200	1	1	1	0	0.45	1	0.8	0.8	1
247600	1	1	1	0	0.55	1	0.825	0.9	1
248000	1	1	1	0	0.5	1	0.925	1	1
248400	1	1	1	0	0.45	1	0.825	0.95	1
248800	1	1	1	0	0.35	1	0.825	0.95	1
249200	1	1	1	0.1	0.4	1	0.825	0.95	1
249600	1	1	1	0.125	0.45	1	0.75	0.95	1
250000	1	1	1	0.15	0.55	1	0.75	0.95	1
250400	1	1	1	0.15	0.55	1	0.75	0.95	1
250800	1	1	1	0.15	0.55	1	0.75	0.95	1
251200	1	1	1	0.175	0.65	1	0.75	0.95	1
251600	1	1	1	0.175	0.55	0.975	0.75	0.95	1
252000	1	1	1	0.175	0.5	0.975	0.675	0.95	1
252400	1	1	1	0.175	0.55	0.975	0.775	1	1
252800	1	1	1	0.175	0.6	0.975	0.675	1	1
253200	1	1	1	0.175	0.6	0.975	0.6	1	1
253600	1	1	1	0.175	0.6	0.975	0.675	1	1
254000	1	1	1	0.15	0.55	0.975	0.575	1	1
254400	1	1	1	0.15	0.55	0.975	0.475	1	1
254800	1	1	1	0.15	0.5	0.975	0.475	1	1
255200	1	1	1	0.125	0.45	0.975	0.475	1	1
255600	1	1	1	0.125	0.45	1	0.55	1	1
256000	1	1	1	0.125	0.45	1	0.625	1	1
256400	1	1	1	0.125	0.45	1	0.625	1	1
256800	1	1	1	0.125	0.4	0.975	0.725	1	1
257200	1	1	1	0.05	0.4	0.975	0.8	1	1
257600	1	1	1	0.025	0.3	0.95	0.8	1	1
258000	1	1	1	0.025	0.25	0.95	0.825	1	1
258400	1	1	1	0.025	0.2	0.95	0.825	1	1
258800	1	1	1	0.025	0.2	0.95	0.75	1	1
259200	1	1	1	0.125	0.25	0.95	0.75	1	1
259600	1	1	1	0.15	0.35	0.95	0.75	1	1
260000	1	1	1	0.15	0.45	0.95	0.675	1	1
260400	1	1	1	0.15	0.4	0.95	0.6	1	1
260800	1	1	1	0.15	0.5	0.975	0.6	1	1
261200	1	1	1	0.125	0.5	0.975	0.6	1	1
261600	1	1	1	0.225	0.6	1	0.5	0.95	1
262000	1	1	1	0.225	0.6	0.975	0.475	0.95	1
262400	1	1	1	0.25	0.7	0.975	0.575	0.95	1
262800	1	1	1	0.35	0.8	0.975	0.65	0.95	1
263200	1	1	1	0.25	0.7	0.95	0.65	0.95	1
263600	1	1	1	0.225	0.6	0.95	0.575	0.95	1
264000	1	1	1	0.225	0.6	0.95	0.65	0.95	1
264400	1	1	1	0.225	0.6	0.95	0.725	0.95	1
264800	1	1	1	0.25	0.6	0.95	0.625	0.95	1
265200	1	1	1	0.25	0.5	0.85	0.625	0.95	1
265600	1	1	1	0.15	0.4	0.85	0.625	1	1
266000	1	1	1	0.15	0.4	0.875	0.65	1	1
266400	1	1	1	0.125	0.3	0.875	0.65	1	1
266800	1	1	1	0.025	0.2	0.875	0.65	1	1
267200	1	1	1	0.025	0.3	0.9	0.65	1	1
267600	1	1	1	0.025	0.35	0.9	0.725	1	1
268000	1	1	1	0.025	0.35	0.9	0.65	1	1
268400	1	1	1	0.025	0.45	0.9	0.575	1	1
268800	1	1	1	0	0.35	0.875	0.575	0.95	1
269200	1	1	1	0	0.35	0.975	0.575	0.95	1
269600	1	1	1	0	0.4	0.975	0.675	0.95	1
270000	1	1	1	0	0.45	0.975	0.75	0.95	1
270400	1	1	1	0	0.45	0.95	0.65	0.95	1
270800	1	1	1	0	0.5	0.95	0.65	0.95	1
271200	1	1	1	0	0.4	0.925	0.55	0.95	1
271600	1	1	1	0	0.4	0.925	0.475	0.95	1
272000	1	1	1	0	0.3	0.925	0.475	0.95	1
272400	1	1	1	0	0.25	0.925	0.475	0.95	1
272800	1	1	1	0	0.3	0.95	0.475	0.95	1
273200	1	1	1	0	0.3	0.85	0.4	0.95	1
273600	1	1	1	0	0.25	0.825	0.4	0.95	1
274000	1	1	1	0	0.2	0.8	0.325	0.95	1
274400	1	1	1	0	0.2	0.825	0.425	0.95	1
274800	1	1	1	0	0.15	0.825	0.325	0.95	1
275200	1	1	1	0.1	0.25	0.85	0.425	0.95	1
275600	1	1	1	0.1	0.25	0.85	0.5	0.95	1
276000	1	1	1	0.1	0.35	0.85	0.475	0.95	1
276400	1	1	1	0.1	0.3	0.85	0.45	0.9	1
276800	1	1	1	0.1	0.3	0.85	0.55	0.95	1
277200	1	1	1	0.1	0.4	0.95	0.625	0.95	1
277600	1	1	1	0.1	0.45	0.975	0.55	0.95	1
278000	1	1	1	0.1	0.55	1	0.625	0.95	1
278400	1	1	1	0.1	0.65	1	0.625	0.95	1
278800	1	1	1	0.1	0.7	1	0.725	0.95	1
279200	1	1	1	0	0.7	1	0.65	0.95	1
279600	1	1	1	0.025	0.75	1	0.65	0.95	1
280000	1	1	1	0.025	0.65	1	0.675	0.95	1
280400	1	1	1	0.025	0.65	1	0.7	1	1
280800	1	1	1	0.025	0.65	1	0.7	1	1
281200	1	1	1	0.025	0.65	1	0.625	1	1
281600	1	1	1	0.025	0.65	1	0.7	1	1
282000	1	1	1	0.025	0.55	1	0.6	0.95	1
282400	1	1	1	0.025	0.45	0.9	0.6	0.95	1
282800	1	1	1	0.05	0.5	0.9	0.6	0.95	1
283200	1	1	1	0.05	0.4	0.9	0.675	0.95	1
283600	1	1	1	0.025	0.35	0.9	0.575	0.9	1
284000	1	1	1	0.05	0.45	0.9	0.575	0.9	1
284400	1	1	1	0.05	0.45	0.8	0.65	0.9	1
284800	1	1	1	0.05	0.45	0.8	0.65	0.9	1
285200	1	1	1	0.05	0.35	0.8	0.725	0.9	1
285600	1	1	1	0.05	0.35	0.8	0.725	0.9	1
286000	1	1	1	0.075	0.45	0.8	0.825	0.95	1
286400	1	1	1	0.075	0.45	0.875	0.825	0.95	1
286800	1	1	1	0.05	0.4	0.875	0.75	0.95	1
287200	1	1	1	0.05	0.5	0.875	0.75	0.95	1
287600	1	1	1	0.05	0.45	0.875	0.85	1	1
288000	1	1	1	0.125	0.45	0.875	0.925	1	1
288400	1	1	1	0.225	0.55	0.975	0.925	1	1
288800	1	1	1	0.225	0.5	0.975	0.925	1	1
289200	1	1	1	0.225	0.5	0.975	0.925	1	1
289600	1	1	1	0.225	0.45	0.95	0.925	1	1
290000	1	1	1	0.2	0.4	0.95	0.925	1	1
290400	1	1	1	0.225	0.5	0.975	0.925	1	1
290800	1	1	1	0.25	0.55	0.975	1	1	1
291200	1	1	1	0.275	0.55	0.975	1	1	1
291600	1	1	1	0.275	0.65	0.975	1	1	1
292000	1	1	1	0.175	0.6	0.975	1	1	1
292400	1	1	1	0.075	0.6	0.975	1	1	1
292800	1	1	1	0.075	0.6	0.95	1	1	1
293200	1	1	1	0.1	0.7	0.95	0.9	1	1
293600	1	1	1	0.2	0.8	0.975	0.8	1	1
294000	1	1	1	0.2	0.85	0.975	0.7	1	1
294400	1	1	1	0.175	0.8	0.975	0.7	1	1
294800	1	1	1	0.15	0.75	0.975	0.625	1	1
295200	1	1	1	0.125	0.7	0.975	0.625	1	1
295600	1	1	1	0.125	0.65	0.975	0.625	1	1
296000	1	1	1	0.125	0.7	0.975	0.625	1	1
296400	1	1	1	0.125	0.7	0.975	0.55	1	1
296800	1	1	1	0.125	0.7	0.9	0.55	1	1
297200	1	1	1	0.1	0.7	0.9	0.575	1	1
297600	1	1	1	0	0.65	0.9	0.675	1	1
298000	1	1	1	0	0.6	0.9	0.775	1	1
298400	1	1	1	0	0.6	0.9	0.675	0.9	1
298800	1	1	1	0	0.55	0.9	0.75	0.9	1
299200	1	1	1	0.025	0.6	0.9	0.675	0.9	1
299600	1	1	1	0.025	0.55	0.9	0.675	0.9	1
300000	1	1	1	0.025	0.5	0.9	0.675	0.9	1
300400	1	1	1	0.05	0.5	0.9	0.65	0.85	1
300800	1	1	1	0.05	0.55	1	0.575	0.85	1
301200	1	1	1	0.075	0.55	1	0.55	0.85	1
301600	1	1	1	0.175	0.6	1	0.55	0.85	1
302000	1	1	1	0.275	0.65	1	0.55	0.85	1
302400	1	1	1	0.275	0.65	1	0.55	0.9	1
302800	1	1	1	0.275	0.7	1	0.475	0.9	1
303200	1	1	1	0.25	0.6	0.975	0.475	0.9	1
303600	1	1	1	0.25	0.6	0.95	0.375	0.9	1
304000	1	1	1	0.25	0.6	0.95	0.275	0.8	1
304400	1	1	1	0.225	0.55	0.95	0.375	0.85	1
304800	1	1	1	0.225	0.55	0.95	0.45	0.85	1
305200	1	1	1	0.2	0.45	0.85	0.45	0.8	1
305600	1	1	1	0.1	0.4	0.85	0.45	0.8	1
306000	1	1	1	0	0.3	0.825	0.35	0.8	1
306400	1	1	1	0	0.25	0.825	0.45	0.85	1
306800	1	1	1	0.025	0.3	0.825	0.425	0.85	1
307200	1	1	1	0.125	0.4	0.85	0.5	0.85	1
307600	1	1	1	0.125	0.4	0.775	0.525	0.85	1
308000	1	1	1	0.125	0.35	0.775	0.55	0.95	1
308400	1	1	1	0.125	0.3	0.75	0.55	0.95	1
308800	1	1	1	0.15	0.35	0.75	0.55	0.95	1
309200	1	1	1	0.15	0.45	0.85	0.65	1	1
309600	1	1	1	0.15	0.5	0.85	0.65	1	1
310000	1	1	1	0.15	0.6	0.875	0.675	1	1
310400	1	1	1	0.15	0.65	0.875	0.6	1	1
310800	1	1	1	0.125	0.6	0.875	0.7	1	1
311200	1	1	1	0.025	0.5	0.875	0.7	1	1
311600	1	1	1	0.025	0.5	0.975	0.675	1	1
312000	1	1	1	0.05	0.6	0.975	0.75	1	1
312400	1	1	1	0.05	0.7	1	0.675	1	1
312800	1	1	1	0.025	0.7	1	0.675	1	1
313200	1	1	1	0.025	0.6	0.9	0.675	1	1
313600	1	1	1	0.05	0.6	0.9	0.575	1	1
314000	1	1	1	0.05	0.55	0.9	0.65	1	1
314400	1	1	1	0.05	0.6	0.9	0.725	1	1
314800	1	1	1	0.05	0.6	0.9	0.625	0.95	1
315200	1	1	1	0.075	0.7	0.9	0.625	0.95	1
315600	1	1	1	0.1	0.8	0.9	0.625	0.95	1
316000	1	1	1	0.1	0.8	0.9	0.625	0.95	1
316400	1	1	1	0.1	0.7	0.875	0.6	0.95	1
316800	1	1	1	0.125	0.7	0.875	0.6	0.95	1
317200	1	1	1	0.125	0.8	0.975	0.6	0.95	1
317600	1	1	1	0.1	0.8	0.975	0.625	0.95	1
318000	1	1	1	0.125	0.85	0.975	0.525	0.95	1
318400	1	1	1	0.125	0.75	0.95	0.525	0.95	1
318800	1	1	1	0.125	0.7	0.95	0.625	1	1
319200	1	1	1	0.1	0.7	0.95	0.625	1	1
319600	1	1	1	0.075	0.6	0.95	0.65	1	1
320000	1	1	1	0.05	0.5	0.95	0.65	1	1
320400	1	1	1	0.05	0.6	0.975	0.75	1	1
320800	1	1	1	0.025	0.6	0.975	0.65	1	1
321200	1	1	1	0.025	0.6	0.975	0.65	1	1
321600	1	1	1	0.05	0.6	0.975	0.725	1	1
322000	1	1	1	0.025	0.55	0.975	0.825	1	1
322400	1	1	1	0.025	0.65	1	0.825	1	1
322800	1	1	1	0.125	0.75	1	0.825	1	1
323200	1	1	1	0.125	0.65	0.9	0.825	1	1
323600	1	1	1	0.125	0.65	0.875	0.825	1	1
324000	1	1	1	0.125	0.65	0.85	0.825	1	1
324400	1	1	1	0.125	0.65	0.85	0.825	1	1
324800	1	1	1	0.125	0.65	0.85	0.85	1	1
325200	1	1	1	0.125	0.6	0.85	0.775	1	1
325600	1	1	1	0.1	0.5	0.825	0.775	1	1
326000	1	1	1	0.1	0.5	0.825	0.675	1	1
326400	1	1	1	0.1	0.4	0.725	0.675	1	1
326800	1	1	1	0	0.4	0.725	0.675	1	1
327200	1	1	1	0	0.4	0.825	0.675	1	1
327600	1	1	1	0	0.5	0.85	0.75	1	1
328000	1	1	1	0	0.5	0.875	0.75	1	1
328400	1	1	1	0	0.5	0.875	0.65	1	1
328800	1	1	1	0	0.45	0.875	0.65	1	1
329200	1	1	1	0	0.4	0.85	0.725	1	1
329600	1	1	1	0	0.4	0.875	0.625	1	1
330000	1	1	1	0.025	0.45	0.875	0.65	1	1
330400	1	1	1	0.025	0.45	0.975	0.65	1	1
330800	1	1	1	0.025	0.45	0.975	0.65	1	1
331200	1	1	1	0.025	0.55	0.975	0.575	1	1
331600	1	1	1	0.025	0.5	0.975	0.575	1	1
332000	1	1	1	0.025	0.5	0.875	0.475	1	1
332400	1	1	1	0.025	0.5	0.875	0.475	1	1
332800	1	1	1	0.025	0.45	0.875	0.45	0.95	1
333200	1	1	1	0.025	0.45	0.9	0.45	0.95	1
333600	1	1	1	0.125	0.55	0.9	0.45	0.85	1
334000	1	1	1	0.2	0.55	0.9	0.525	0.85	1
334400	1	1	1	0.2	0.6	0.9	0.525	0.85	1
334800	1	1	1	0.225	0.6	0.9	0.525	0.85	1
335200	1	1	1	0.225	0.6	0.9	0.5	0.8	1
335600	1	1	1	0.225	0.55	0.875	0.5	0.8	1
336000	1	1	1	0.25	0.65	0.975	0.6	0.8	1
336400	1	1	1	0.25	0.55	0.975	0.6	0.8	1
336800	1	1	1	0.25	0.6	0.975	0.7	0.85	1
337200	1	1	1	0.25	0.6	0.95	0.7	0.85	1
337600	1	1	1	0.15	0.55	0.95	0.725	0.95	1
338000	1	1	1	0.05	0.45	0.925	0.65	0.95	1
338400	1	1	1	0.075	0.5	0.925	0.55	0.95	1
338800	1	1	1	0.05	0.4	0.9	0.475	0.95	1
339200	1	1	1	0.05	0.3	0.875	0.575	1	1
339600	1	1	1	0.05	0.4	0.9	0.575	1	1
340000	1	1	1	0.025	0.4	0.9	0.5	1	1
340400	1	1	1	0.025	0.5	0.9	0.6	1	1
340800	1	1	1	0.025	0.45	0.875	0.6	1	1
341200	1	1	1	0.125	0.55	0.9	0.525	1	1
341600	1	1	1	0.125	0.5	0.875	0.525	1	1
342000	1	1	1	0.15	0.6	0.9	0.5	0.9	0.975
342400	1	1	1	0.125	0.6	0.9	0.5	0.9	0.975
342800	1	1	1	0.125	0.6	0.925	0.475	0.9	0.975
343200	1	1	1	0.225	0.7	0.95	0.4	0.9	0.975
343600	1	1	1	0.225	0.65	0.95	0.4	0.9	0.975
344000	1	1	1	0.225	0.55	0.95	0.4	0.9	0.975
344400	1	1	1	0.225	0.55	0.95	0.4	0.9	0.975
344800	1	1	1	0.225	0.55	0.975	0.4	0.9	0.975
345200	1	1	1	0.125	0.45	0.95	0.475	0.9	0.975
345600	1	1	1	0.125	0.5	0.975	0.45	0.9	0.975
346000	1	1	1	0.1	0.4	0.975	0.55	1	1
346400	1	1	1	0.1	0.3	0.975	0.65	1	1
346800	1	1	1	0.1	0.3	0.95	0.75	1	1
347200	1	1	1	0	0.25	0.95	0.825	1	1
347600	1	1	1	0	0.25	0.95	0.825	1	1
348000	1	1	1	0.025	0.35	0.95	0.9	1	1
348400	1	1	1	0.025	0.25	0.95	0.9	1	1
348800	1	1	1	0.05	0.35	0.95	0.9	1	1
349200	1	1	1	0.05	0.35	0.95	0.825	1	1
349600	1	1	1	0.05	0.35	0.95	0.925	1	1
350000	1	1	1	0.05	0.4	0.95	0.925	1	1
350400	1	1	1	0.05	0.4	0.95	0.85	1	1
350800	1	1	1	0.05	0.4	0.95	0.85	1	1
351200	1	1	1	0.05	0.35	0.95	0.75	1	1
351600	1	1	1	0.05	0.4	0.95	0.75	1	1
352000	1	1	1	0.025	0.35	0.95	0.75	1	1
352400	1	1	1	0.025	0.4	0.95	0.75	1	1
352800	1	1	1	0	0.3	0.85	0.75	1	1
353200	1	1	1	0	0.3	0.85	0.825	1	1
353600	1	1	1	0	0.3	0.85	0.825	1	1
354000	1	1	1	0	0.25	0.825	0.75	1	1
354400	1	1	1	0	0.25	0.725	0.825	1	1
354800	1	1	1	0	0.25	0.725	0.825	1	1
355200	1	1	1	0	0.25	0.725	0.825	0.95	1
355600	1	1	1	0.025	0.25	0.725	0.725	0.85	0.975
356000	1	1	1	0.025	0.2	0.7	0.625	0.85	0.975
356400	1	1	1	0.025	0.15	0.675	0.55	0.85	0.975
356800	1	1	1	0.025	0.2	0.775	0.55	0.85	0.975
357200	1	1	1	0.025	0.3	0.8	0.55	0.85	0.975
357600	1	1	1	0.025	0.35	0.8	0.475	0.85	0.975
358000	1	1	1	0.05	0.45	0.825	0.55	0.85	0.975
358400	1	1	1	0.05	0.5	0.925	0.55	0.85	0.975
358800	1	1	1	0.05	0.6	0.95	0.55	0.85	0.975
359200	1	1	1	0.05	0.65	0.95	0.65	0.9	0.975
359600	1	1	1	0.025	0.55	0.95	0.75	1	1
360000	1	1	1	0.025	0.55	0.875	0.85	1	1
360400	1	1	1	0.05	0.65	0.9	0.925	1	1
360800	1	1	1	0.05	0.65	0.9	0.825	1	1
361200	1	1	1	0.075	0.65	0.9	0.825	1	1
361600	1	1	1	0.075	0.55	0.875	0.8	0.95	1
362000	1	1	1	0.05	0.55	0.875	0.7	0.95	1
362400	1	1	1	0.15	0.6	0.875	0.625	0.95	1
362800	1	1	1	0.15	0.5	0.875	0.55	0.95	1
363200	1	1	1	0.15	0.45	0.875	0.45	0.95	1
363600	1	1	1	0.25	0.55	0.875	0.45	0.95	1
364000	1	1	1	0.25	0.55	0.975	0.375	0.95	1
364400	1	1	1	0.225	0.45	0.975	0.375	0.95	1
364800	1	1	1	0.225	0.45	0.975	0.475	0.95	1
365200	1	1	1	0.2	0.4	0.975	0.375	0.95	1
365600	1	1	1	0.225	0.5	1	0.4	1	1
366000	1	1	1	0.225	0.45	1	0.5	1	1
366400	1	1	1	0.125	0.4	1	0.5	1	1
366800	1	1	1	0.125	0.5	1	0.475	0.95	1
367200	1	1	1	0.125	0.6	1	0.575	0.95	1
367600	1	1	1	0.025	0.6	1	0.575	0.95	1
368000	1	1	1	0.025	0.6	0.9	0.55	0.95	1
368400	1	1	1	0.025	0.7	0.9	0.55	0.95	1
368800	1	1	1	0.125	0.75	0.9	0.45	0.85	1
369200	1	1	1	0.125	0.7	0.9	0.475	0.85	1
369600	1	1	1	0.1	0.6	0.875	0.475	0.85	1
370000	1	1	1	0.125	0.65	0.875	0.475	0.85	1
370400	1	1	1	0.125	0.6	0.85	0.55	0.85	1
370800	1	1	1	0.125	0.5	0.825	0.65	0.9	1
371200	1	1	1	0.125	0.45	0.825	0.575	0.9	1
371600	1	1	1	0.125	0.4	0.825	0.575	0.9	1
372000	1	1	1	0.125	0.5	0.925	0.675	0.9	1
372400	1	1	1	0.125	0.4	0.9	0.675	0.9	1
372800	1	1	1	0.025	0.4	0.9	0.775	1	1
373200	1	1	1	0.025	0.45	0.9	0.85	1	1
373600	1	1	1	0.025	0.5	0.925	0.925	1	1
374000	1	1	1	0	0.5	0.925	0.825	1	1
374400	1	1	1	0	0.5	0.925	0.825	1	1
374800	1	1	1	0	0.5	0.925	0.75	1	1
375200	1	1	1	0	0.55	0.925	0.825	1	1
375600	1	1	1	0	0.6	0.925	0.825	1	1
376000	1	1	1	0	0.6	0.925	0.825	1	1
376400	1	1	1	0.1	0.7	0.95	0.725	1	1
376800	1	1	1	0.1	0.6	0.95	0.725	1	1
377200	1	1	1	0.1	0.55	0.95	0.65	1	1
377600	1	1	1	0.125	0.6	0.95	0.55	1	1
378000	1	1	1	0.125	0.55	0.95	0.65	1	1
378400	1	1	1	0.125	0.55	0.95	0.65	1	1
378800	1	1	1	0.125	0.55	0.975	0.725	1	1
379200	1	1	1	0.125	0.5	0.975	0.725	1	1
379600	1	1	1	0.125	0.5	0.975	0.725	1	1
380000	1	1	1	0.125	0.5	0.975	0.725	1	1
380400	1	1	1	0.025	0.5	0.975	0.75	1	1
380800	1	1	1	0.025	0.5	0.975	0.75	1	1
381200	1	1	1	0.05	0.6	0.975	0.825	1	1
381600	1	1	1	0.025	0.55	0.975	0.85	1	1
382000	1	1	1	0.025	0.55	0.975	0.85	1	1
382400	1	1	1	0.025	0.55	0.975	0.85	1	1
382800	1	1	1	0.025	0.6	0.975	0.775	1	1
383200	1	1	1	0.025	0.55	0.95	0.7	1	1
383600	1	1	1	0.025	0.45	0.925	0.7	1	1
384000	1	1	1	0.025	0.4	0.925	0.7	1	1
384400	1	1	1	0.05	0.4	0.925	0.775	1	1
384800	1	1	1	0.05	0.4	0.925	0.675	1	1
385200	1	1	1	0.025	0.3	0.925	0.6	1	1
385600	1	1	1	0.025	0.25	0.9	0.6	1	1
386000	1	1	1	0.025	0.2	0.875	0.6	1	1
386400	1	1	1	0.025	0.25	0.9	0.525	1	1
386800	1	1	1	0.025	0.3	0.9	0.6	1	1
387200	1	1	1	0.025	0.3	0.825	0.675	1	1
387600	1	1	1	0.025	0.3	0.825	0.675	1	1
388000	1	1	1	0.025	0.35	0.825	0.675	1	1
388400	1	1	1	0	0.3	0.825	0.675	1	1
388800	1	1	1	0	0.4	0.825	0.775	1	1
389200	1	1	1	0	0.45	0.825	0.85	1	1
389600	1	1	1	0	0.45	0.75	0.925	1	1
390000	1	1	1	0	0.5	0.775	0.825	0.9	1
390400	1	1	1	0.025	0.55	0.775	0.9	0.9	1
390800	1	1	1	0.05	0.55	0.775	0.9	0.9	1
391200	1	1	1	0.05	0.55	0.875	0.825	0.9	1
391600	1	1	1	0.05	0.65	0.9	0.75	0.9	1
392000	1	1	1	0.05	0.65	0.9	0.675	0.9	1
392400	1	1	1	0.05	0.65	0.9	0.675	0.9	1
392800	1	1	1	0.05	0.55	0.9	0.675	0.9	1
393200	1	1	1	0.05	0.5	0.875	0.675	0.9	1
393600	1	1	1	0.05	0.6	0.975	0.675	0.9	1
394000	1	1	1	0.075	0.65	0.975	0.775	1	1
394400	1	1	1	0.075	0.65	0.975	0.7	1	1
394800	1	1	1	0.05	0.55	0.975	0.7	1	1
395200	1	1	1	0.05	0.6	0.975	0.7	1	1
395600	1	1	1	0.05	0.5	0.95	0.775	1	1
396000	1	1	1	0.05	0.5	0.95	0.85	1	1
396400	1	1	1	0.05	0.55	0.95	0.85	1	1
396800	1	1	1	0.05	0.6	0.95	0.75	0.95	1
397200	1	1	1	0.05	0.7	0.975	0.65	0.95	1
397600	1	1	1	0.05	0.65	0.975	0.575	0.95	1
398000	1	1	1	0.025	0.55	0.975	0.5	0.95	1
398400	1	1	1	0	0.5	0.975	0.575	0.95	1
398800	1	1	1	0	0.6	0.975	0.575	0.95	1
399200	1	1	1	0.025	0.65	0.975	0.65	0.95	1
399600	1	1	1	0.025	0.65	0.9	0.65	0.95	1
400000	1	1	1	0.025	0.65	0.9	0.55	0.9	1
