# Supplementary material
Source: ML conference proceedings conference paper supplement (https://openreview.net/forum?id=Lb8ZnWW_In6)
Supplement: supplementary_material [file craft_t5.xlsx]

## Sheet: aqrm
0	0	0	0	0	0	0	0	0	0
0	0	0	0	0	0	0	0	0	0
0	0	0	0	0	0	0	0	0	0
0	0	0	0	0	0	0	0	0	0
0	0	0	0	0	0	0	0	0	0
0	0	0	0	0	0	0	0	0	0
0	0	0	0	0	0	0	0	0	0
0	0	0	0	0	0	0	0	0	0
0	0	0	0	0	0	0	0	0	0
0	0	0	0	0	0	0	0	0	0
0	0	0	0	0	0	0	0	0	0
0	0	0	0	0	0	0	0	0	0
0	0	0	0	0	0	0	0	0	0
0	0	0	0	0	0	0	0	0	0
0	0	0	0	0	0	0	0	0	0
0	0	0	0	0	0	0	0	0	0
0	0	0	0	0	0	0	0	0	0
0	0	0	0	0	0	0	0	0	0
0	0	0	0	0	0	0	0	0	0
0	0	0	0	0	0	0	0	0	0
0	0	0	0	0	0	0	0	0	0
0	0	0	0	0	0	0	0	0	0
0	0	0	0	0	0	0	0	0	0
0	0	0	0	0	0	0	0	0	0
0	0	0	0	0	0	0	1	0	0
0	0	0	0	0	0	0	0	0	0
0	0	0	0	0	0	0	0	0	0
0	0	0	0	0	0	0	0	0	0
0	0	0	0	0	0	0	0	0	0
0	0	0	0	0	0	0	0	0	0
0	0	0	0	0	0	1	0	0	0
0	0	0	0	0	0	0	0	0	0
0	0	0	0	0	0	0	0	0	0
0	0	0	0	0	0	0	0	0	0
0	0	0	0	0	0	0	0	0	0
0	0	0	0	0	0	0	0	0	0
0	0	0	0	0	0	0	0	1	0
0	0	0	0	0	0	0	0	0	0
0	0	0	0	0	0	0	0	0	0
0	0	0	0	0	0	0	0	0	0
0	0	0	0	0	0	0	0	0	0
0	0	0	0	0	0	0	0	0	0
0	0	0	0	0	0	0	1	0	0
1	0	1	0	0	0	0	0	0	0
0	0	0	0	0	0	0	0	0	0
0	1	0	0	0	0	0	1	0	0
0	0	0	0	0	0	0	0	0	0
0	0	0	0	0	0	0	0	0	0
0	0	0	0	0	0	0	1	0	0
0	0	0	0	0	0	0	0	0	0
0	0	0	0	0	0	0	0	0	0
0	0	0	0	0	0	0	0	0	0
0	0	0	0	0	0	0	0	0	0
0	0	0	0	0	0	0	0	0	0
0	0	0	0	0	0	0	0	0	0
0	0	0	0	0	0	0	0	0	0
0	0	0	0	0	0	0	0	0	0
0	0	0	0	0	0	0	0	0	0
0	0	0	0	0	0	0	0	0	0
0	0	0	0	0	0	0	0	0	0
0	0	0	0	0	0	0	0	0	0
0	0	0	0	0	0	0	0	0	0
0	0	0	0	0	0	0	0	0	0
0	0	0	0	0	0	0	0	0	0
0	0	0	0	0	0	0	0	0	0
0	0	0	0	0	0	0	0	0	0
0	0	0	0	0	0	0	0	0	0
0	0	0	0	0	0	0	0	0	0
1	0	0	0	0	0	0	0	0	0
0	0	0	0	0	0	0	0	0	0
0	0	0	0	0	0	0	0	0	0
0	0	0	0	1	1	0	0	0	0
0	0	0	0	0	0	0	0	0	0
0	0	0	0	0	0	0	0	0	0
0	0	0	0	0	0	0	0	0	0
0	0	0	0	0	0	0	0	0	0
0	0	0	0	0	0	0	0	0	0
0	0	0	0	0	0	0	0	0	0
0	0	0	0	0	0	0	0	0	0
0	0	0	0	0	0	0	0	0	0
0	0	0	0	0	0	0	0	0	0
0	0	0	0	0	0	0	0	0	0
0	0	0	0	0	0	0	0	0	0
0	0	0	0	0	0	0	0	0	0
0	1	0	0	0	0	0	0	0	0
0	0	0	0	0	0	1	0	0	0
0	0	0	0	0	0	0	0	0	0
0	0	0	0	0	0	0	0	0	0
0	0	0	0	0	0	0	0	0	0
0	1	0	0	0	0	0	0	1	0
0	0	0	0	0	0	0	0	0	0
0	0	0	0	0	0	0	1	1	1
0	0	0	0	0	0	0	1	0	0
0	0	0	0	0	0	0	0	0	0
0	0	0	0	0	0	0	0	0	0
0	0	0	1	0	0	0	0	0	1
0	0	0	0	0	0	0	0	0	0
0	0	0	0	0	0	0	0	0	0
0	0	0	1	0	0	0	0	0	0
0	0	0	0	0	0	0	0	0	0
0	0	0	0	0	0	0	0	0	0
0	0	0	0	0	0	0	0	0	0
0	0	0	0	0	0	0	0	0	0
0	0	0	0	0	0	1	0	0	0
0	0	0	0	0	1	0	0	0	0
0	0	0	0	0	0	0	0	0	0
0	0	0	0	0	0	0	0	0	0
0	0	0	0	0	0	0	0	0	0
0	0	0	0	0	0	0	0	0	0
0	0	0	0	0	0	0	0	0	0
0	0	0	0	0	0	0	0	0	0
0	0	0	0	0	0	0	0	0	0
0	0	0	0	0	0	0	0	0	0
0	0	0	0	0	0	0	0	0	0
0	0	0	0	0	0	0	0	1	0
0	0	0	0	0	0	0	1	0	0
0	0	0	0	0	0	0	0	0	0
0	0	0	1	0	0	0	0	0	0
0	1	0	1	0	0	0	0	0	0
0	0	0	0	0	0	0	0	0	1
0	0	0	1	0	0	0	0	0	0
0	0	0	0	0	0	0	0	0	0
0	0	0	0	0	0	0	0	0	0
0	1	0	0	0	0	0	0	0	0
0	0	0	0	0	0	0	0	0	0
0	0	0	0	0	0	0	0	0	0
0	0	0	0	0	0	0	0	0	0
0	0	0	0	0	0	0	0	0	0
0	0	0	0	0	0	0	0	0	0
0	0	0	0	0	0	0	0	0	0
0	0	0	0	0	0	0	0	0	0
0	0	0	0	1	0	0	1	0	0
0	0	0	0	0	0	0	0	0	0
0	0	0	0	0	0	0	0	0	1
0	0	0	0	0	0	1	0	0	0
0	0	0	0	0	0	0	0	0	0
0	0	0	0	0	1	0	0	1	0
0	0	1	0	0	0	0	0	0	0
0	0	1	0	0	0	0	0	0	0
0	0	0	0	0	0	0	1	0	0
0	0	0	0	0	0	0	0	0	0
0	0	0	0	0	0	0	0	0	0
0	0	0	0	0	0	0	0	0	0
0	0	0	0	0	0	0	0	0	0
0	0	0	0	0	0	0	0	0	0
0	0	0	0	0	0	1	0	0	0
0	0	0	0	0	0	0	0	0	0
0	0	0	0	0	0	0	0	0	0
0	0	0	0	0	0	0	0	0	0
0	0	0	0	0	0	0	0	0	0
0	0	0	0	0	0	0	0	0	0
0	0	0	0	0	0	0	0	0	0
0	0	0	0	0	0	0	0	0	0
0	0	0	0	0	0	0	0	0	0
0	0	0	0	0	0	0	0	0	0
0	0	0	0	0	0	0	0	0	0
0	0	0	0	0	0	0	0	0	1
0	0	0	0	0	0	0	0	0	0
0	0	0	0	0	0	0	0	0	0
0	0	0	0	0	0	0	0	0	0
0	0	0	0	0	0	0	0	0	0
0	0	1	0	0	0	0	0	0	0
0	0	0	0	0	0	0	0	0	0
1	0	0	0	0	0	0	0	0	0
1	1	0	0	0	0	0	0	0	0
0	1	0	0	0	0	0	0	0	0
0	1	0	0	0	0	0	0	0	0
0	0	1	0	0	0	0	0	0	0
0	1	1	0	0	0	0	0	0	0
0	0	1	0	0	0	0	0	0	0
0	0	0	0	0	0	0	0	0	0
0	0	0	0	0	0	0	0	0	0
0	0	0	0	0	0	0	0	0	0
0	0	0	0	0	0	0	0	0	0
0	0	0	0	0	0	0	0	0	0
0	0	1	0	0	0	0	0	0	0
0	0	1	0	0	0	0	0	0	0
0	0	1	0	0	0	0	0	0	0
0	0	0	0	0	0	0	0	0	0
0	0	0	0	0	0	0	0	0	0
0	0	0	0	0	0	0	0	0	0
0	0	0	0	1	0	0	0	0	1
0	0	0	0	0	0	0	0	0	0
0	0	0	0	0	0	0	0	0	0
0	0	0	0	0	0	0	0	0	0
0	0	0	0	0	0	0	0	0	0
1	0	0	0	0	0	0	0	0	0
0	0	0	0	0	0	0	0	0	0
0	0	0	0	0	0	0	0	0	0
0	0	0	0	0	0	0	0	0	0
0	0	0	0	0	0	0	0	0	0
0	0	0	0	0	0	0	1	0	0
0	0	0	0	0	0	0	0	0	0
0	0	0	0	0	0	0	0	0	0
0	1	0	0	0	0	0	0	0	0
0	0	0	0	0	0	0	0	0	0
0	0	0	0	0	0	0	0	0	0
0	1	0	0	0	0	1	0	0	0
0	0	0	0	0	0	0	0	0	0
0	0	0	0	0	0	0	0	0	0
0	0	0	0	0	0	0	0	0	0
0	0	0	0	0	0	0	0	0	0
0	1	0	0	0	1	0	0	0	0
0	0	0	0	0	0	0	0	0	0
0	0	0	0	0	0	0	0	0	0
0	0	0	0	0	0	0	0	0	0
0	0	0	0	0	0	0	0	0	0
0	1	0	0	0	0	0	0	0	0
0	0	0	0	0	0	0	0	0	0
0	1	0	0	0	0	0	0	0	0
0	1	0	0	0	0	0	0	0	0
0	0	0	0	0	0	0	0	0	0
1	1	0	0	0	0	0	0	0	0
1	1	0	0	0	0	0	0	0	0
0	1	0	0	0	0	0	0	0	0
0	0	0	0	0	0	0	0	0	1
0	0	0	0	0	0	0	0	0	0
0	1	0	0	0	0	0	0	0	0
0	1	1	0	0	0	0	0	0	0
0	1	0	0	0	0	0	0	0	0
0	1	0	0	0	0	0	0	0	0
1	1	0	0	0	0	0	0	0	0
0	1	0	0	0	0	0	0	0	0
0	1	0	0	0	0	1	0	0	0
1	1	1	0	0	0	0	0	0	0
0	1	0	0	0	0	0	0	0	0
0	1	0	0	0	0	0	0	0	0
0	1	0	0	0	0	0	0	0	0
0	1	0	0	0	0	0	0	0	0
0	1	0	0	0	0	0	0	0	0
1	1	0	0	0	0	1	0	0	0
0	1	0	0	0	0	0	0	0	0
0	1	0	0	0	0	0	0	0	0
1	1	0	0	0	0	0	0	0	0
1	1	0	1	0	0	0	0	0	0
1	1	0	0	0	0	0	0	0	0
1	1	0	0	0	0	0	0	0	0
1	1	0	0	0	0	0	0	0	0
0	1	0	0	0	0	0	0	0	0
1	1	0	0	0	0	0	0	0	0
1	1	0	0	0	0	0	0	0	0
1	1	0	0	0	0	0	0	0	0
1	1	0	0	0	0	0	0	0	0
1	1	0	0	0	0	0	0	0	0
1	1	0	0	0	0	0	0	0	0
1	1	0	0	0	0	0	0	0	0
1	1	0	0	0	0	0	0	0	0
1	1	0	0	0	0	0	0	0	0
1	1	0	0	0	0	1	0	0	0
1	1	0	0	0	0	0	0	0	0
1	1	0	0	0	0	0	0	1	0
1	1	0	0	0	0	0	1	0	0
1	1	0	0	0	0	0	0	0	0
1	1	0	0	0	0	0	0	0	0
1	1	0	0	0	0	0	0	0	0
1	1	0	0	0	0	0	0	0	0
1	1	0	0	0	0	0	0	0	0
1	1	0	0	0	0	0	0	0	0
1	1	0	0	0	0	0	0	0	0
1	1	0	0	0	0	0	0	0	0
1	1	0	0	0	0	0	0	0	0
1	1	0	0	0	0	0	0	0	0
1	1	0	0	0	0	0	0	1	0
1	1	0	0	0	0	1	0	0	0
1	1	0	0	0	0	0	1	0	0
1	1	0	0	0	0	0	0	0	0
1	1	0	0	0	0	0	0	0	0
1	1	0	0	0	0	0	0	0	0
1	1	0	0	0	0	0	0	0	0
1	1	0	0	0	0	0	0	0	0
1	1	0	0	0	0	0	0	0	0
1	1	0	0	0	0	0	0	0	0
1	1	0	0	0	0	0	0	0	0
1	1	0	0	0	0	0	0	0	0
1	1	0	0	0	0	0	0	0	0
1	1	0	0	0	0	0	0	0	0
1	1	0	0	0	0	0	0	0	0
1	1	0	0	0	0	0	0	0	0
1	1	0	0	0	0	0	0	0	0
1	1	0	0	0	0	0	1	0	0
1	1	0	0	0	0	0	0	0	0
1	1	0	0	0	0	0	1	1	0
1	1	0	0	0	0	0	0	0	0
1	1	0	0	0	0	0	0	0	0
1	1	0	0	0	0	0	0	0	0
1	1	0	0	0	0	0	0	0	0
1	1	0	0	0	0	0	1	0	0
1	1	0	0	0	0	0	1	0	0
1	1	1	0	0	0	0	1	0	0
1	1	1	0	0	0	0	1	0	0
1	1	0	0	0	0	0	1	0	0
1	1	0	0	0	0	0	1	0	0
1	1	0	0	0	0	0	1	0	0
1	1	0	0	1	0	0	1	0	0
1	1	0	0	0	0	0	1	0	0
1	1	0	0	0	0	0	1	0	0
1	1	0	0	1	0	0	1	0	0
1	1	0	0	0	0	0	1	0	0
1	1	1	0	0	0	0	1	0	0
1	1	0	0	0	0	0	1	0	0
1	1	0	0	0	0	0	1	0	0
1	1	0	0	0	0	0	1	0	0
1	1	0	0	0	0	0	1	0	0
1	1	1	0	0	0	0	1	0	0
1	1	1	0	0	0	0	1	1	0
1	1	1	0	0	0	0	1	1	0
1	1	0	0	0	0	0	1	1	0
1	1	0	0	0	0	0	1	1	0
1	1	0	0	0	0	0	1	0	0
1	1	1	0	0	0	0	1	0	0
1	1	0	0	0	0	0	1	0	0
1	1	1	0	0	0	0	1	0	0
1	1	0	0	0	0	0	1	0	0
1	1	1	0	0	0	0	1	0	0
1	1	1	0	0	0	0	1	0	0
1	1	1	0	0	0	0	1	0	0
1	1	1	0	0	0	0	1	0	0
1	1	1	0	0	0	0	1	0	0
1	1	1	0	0	0	0	1	0	0
1	1	1	0	0	0	0	1	0	0
1	1	1	0	0	0	0	1	0	0
1	1	1	0	0	0	0	1	0	0
1	1	1	0	0	0	0	1	0	0
1	1	1	0	1	0	0	1	0	0
1	1	1	0	0	0	0	1	0	0
1	1	1	0	0	0	0	1	0	0
1	1	1	0	0	0	0	1	0	0
1	1	1	0	0	0	0	1	0	0
1	1	1	0	0	0	0	1	0	0
1	1	1	0	0	0	0	1	0	0
1	1	1	0	0	0	0	1	0	0
1	1	1	0	0	0	0	1	0	0
1	1	1	0	0	0	0	1	0	0
1	1	1	0	0	0	0	1	0	0
1	1	1	0	0	0	0	1	0	0
1	1	1	0	0	0	0	1	0	0
1	1	1	0	0	0	0	1	0	0
1	1	1	0	0	0	0	1	0	0
1	1	1	0	0	0	0	1	0	0
1	1	1	0	0	0	0	1	0	0
1	1	1	0	0	0	0	1	1	0
1	1	1	0	0	0	0	1	0	0
1	1	1	0	0	0	0	1	0	0
1	1	1	0	0	0	0	1	1	0
1	1	1	0	0	0	0	1	0	0
1	1	1	0	0	0	0	1	0	0
1	1	1	0	0	0	0	1	1	0
1	1	1	0	0	0	0	1	1	0
1	1	1	0	0	0	0	1	0	0
1	1	1	0	0	0	0	1	0	0
1	1	1	0	0	0	1	1	1	0
1	1	1	0	0	0	1	1	0	0
1	1	1	0	0	0	1	1	1	1
1	1	1	0	0	0	0	1	1	0
1	1	1	0	0	0	0	1	0	0
1	1	1	0	0	0	0	1	0	0
1	1	1	1	0	0	0	1	0	0
1	1	1	0	0	0	1	1	0	0
1	1	1	0	0	1	1	1	0	0
1	1	1	0	0	0	1	1	0	0
1	1	1	0	0	0	1	1	0	0
1	1	1	0	0	0	1	1	0	0
1	1	1	0	0	0	1	1	0	0
1	1	1	0	0	0	1	1	0	0
1	1	1	0	0	0	1	1	0	0
1	1	1	0	0	0	1	1	0	0
1	1	1	0	0	0	1	1	0	0
1	1	1	0	0	0	1	1	0	0
1	1	1	0	0	0	1	1	0	0
1	1	1	0	0	0	1	1	0	1
1	1	1	0	0	0	1	1	0	1
1	1	1	1	0	0	1	1	0	0
1	1	1	0	0	0	1	1	0	1
1	1	1	0	0	0	1	1	0	0
1	1	1	0	0	0	1	1	0	0
1	1	1	0	0	0	1	1	0	0
1	1	1	0	0	0	1	1	0	0
1	1	1	0	0	0	1	1	0	1
1	1	1	0	0	0	1	1	0	1
1	1	1	0	0	0	1	1	0	1
1	1	1	0	0	0	1	1	0	1
1	1	1	0	0	0	1	1	0	1
1	1	1	0	0	0	1	1	0	1
1	1	1	0	0	0	1	1	0	1
1	1	1	0	0	0	1	1	0	1
1	1	1	0	0	0	1	1	0	1
1	1	1	0	0	0	1	1	0	1
1	1	1	0	0	0	1	1	0	1
1	1	1	0	0	0	1	1	0	1
1	1	1	0	0	0	1	1	0	1
1	1	1	0	0	0	1	1	0	1
1	1	1	0	0	0	1	1	0	1
1	1	1	0	0	0	1	1	0	1
1	1	1	1	0	0	1	1	0	1
1	1	1	1	0	0	1	1	0	1
1	1	1	0	0	0	1	1	0	1
1	1	1	0	0	0	1	1	0	1
1	1	1	0	0	0	1	1	0	1
1	1	1	0	0	0	1	1	1	1
1	1	1	0	0	0	1	1	0	1
1	1	1	0	0	0	1	1	0	1
1	1	1	0	0	0	1	1	1	1
1	1	1	0	0	0	1	1	0	1
1	1	1	0	0	0	1	1	0	1
1	1	1	0	0	0	1	1	0	1
1	1	1	0	0	0	1	1	0	1
1	1	1	0	0	0	1	1	0	1
1	1	1	0	0	0	1	1	0	1
1	1	1	0	0	0	1	1	0	1
1	1	1	0	0	0	1	1	1	1
1	1	1	0	0	0	1	1	1	1
1	1	1	0	0	0	1	1	0	1
1	1	1	0	0	0	1	1	0	1
1	1	1	0	0	0	1	1	1	1
1	1	1	0	0	0	1	1	1	1
1	1	1	0	0	0	1	1	1	1
1	1	1	0	0	0	1	1	0	1
1	1	1	0	0	0	1	1	1	1
1	1	1	0	0	0	1	1	0	1
1	1	1	0	0	0	1	1	1	1
1	1	1	0	0	0	1	1	1	1
1	1	1	0	0	0	1	1	1	1
1	1	1	0	0	0	1	1	0	1
1	1	1	0	0	0	1	1	0	1
1	1	1	0	0	0	1	1	1	1
1	1	1	0	0	0	1	1	1	1
1	1	1	0	0	0	1	1	1	1
1	1	1	1	0	0	1	1	1	1
1	1	1	0	0	0	1	1	1	1
1	1	1	0	0	0	1	1	1	1
1	1	1	0	0	0	1	1	1	1
1	1	1	0	0	0	1	1	1	1
1	1	1	0	0	0	1	1	1	1
1	1	1	0	0	0	1	1	1	1
1	1	1	0	0	0	1	1	1	1
1	1	1	0	0	0	1	1	1	1
1	1	1	0	0	0	1	1	1	1
1	1	1	0	0	0	1	1	1	1
1	1	1	0	0	0	1	1	1	1
1	1	1	0	0	0	1	1	1	1
1	1	1	0	0	0	1	1	1	1
1	1	1	0	0	0	1	1	1	1
1	1	1	0	0	0	1	1	1	1
1	1	1	0	0	0	1	1	1	1
1	1	1	0	0	0	1	1	1	1
1	1	1	0	0	0	1	1	1	1
1	1	1	0	0	1	1	1	1	1
1	1	1	0	0	0	1	1	1	1
1	1	1	0	0	0	1	1	1	1
1	1	1	0	0	0	1	1	1	1
1	1	1	0	0	0	1	1	1	1
1	1	1	0	0	0	1	1	1	1
1	1	1	0	0	0	1	1	1	1
1	1	1	1	0	0	1	1	1	1
1	1	1	0	0	0	1	1	1	1
1	1	1	0	0	0	1	1	1	1
1	1	1	0	0	0	1	1	1	1
1	1	1	0	0	0	1	1	1	1
1	1	1	0	0	0	1	1	1	1
1	1	1	0	0	0	1	1	1	1
1	1	1	0	0	0	1	1	1	1
1	1	1	0	0	0	1	1	1	1
1	1	1	0	0	0	1	1	1	1
1	1	1	0	0	0	1	1	1	1
1	1	1	0	0	0	1	1	1	1
1	1	1	0	0	0	1	1	1	1
1	1	1	0	0	0	1	1	1	1
1	1	1	0	0	0	1	1	1	1
1	1	1	0	0	0	1	1	1	1
1	1	1	0	0	0	1	1	1	1
1	1	1	0	0	0	1	1	1	1
1	1	1	0	0	0	1	1	1	1
1	1	1	0	0	0	1	1	1	1
1	1	1	0	0	0	1	1	1	1
1	1	1	0	0	0	1	1	1	1
1	1	1	0	0	0	1	1	1	1
1	1	1	1	0	0	1	1	1	1
1	1	1	1	0	0	1	1	1	1
1	1	1	0	0	0	1	1	1	1
1	1	1	0	0	0	1	1	1	1
1	1	1	0	0	0	1	1	1	1
1	1	1	0	0	0	1	1	1	1
1	1	1	0	0	0	1	1	1	1
1	1	1	0	0	0	1	1	1	1
1	1	1	0	0	0	1	1	1	1
1	1	1	0	0	0	1	1	1	1
1	1	1	0	0	0	1	1	1	1
1	1	1	0	0	0	1	1	1	1
1	1	1	0	0	0	1	1	1	1
1	1	1	0	0	0	1	1	1	1
1	1	1	0	1	0	1	1	1	1
1	1	1	0	0	0	1	1	1	1
1	1	1	0	0	0	1	1	1	1
1	1	1	0	0	0	1	1	1	1
1	1	1	0	0	0	1	1	1	1
1	1	1	0	0	0	1	1	1	1
1	1	1	0	0	0	1	1	1	1
1	1	1	0	0	0	1	1	1	1
1	1	1	0	0	0	1	1	1	1
1	1	1	0	0	0	1	1	1	1
1	1	1	0	0	0	1	1	1	1
1	1	1	0	0	0	1	1	1	1
1	1	1	0	0	0	1	1	1	1
1	1	1	0	0	0	1	1	1	1
1	1	1	0	0	0	1	1	1	1
1	1	1	0	0	0	1	1	1	1
1	1	1	0	0	0	1	1	1	1
1	1	1	0	0	0	1	1	1	1
1	1	1	0	0	0	1	1	1	1
1	1	1	0	0	0	1	1	1	1
1	1	1	0	0	0	1	1	1	1
1	1	1	0	0	0	1	1	1	1
1	1	1	0	0	0	1	1	1	1
1	1	1	0	0	0	1	1	1	1
1	1	1	0	1	0	1	1	1	1
1	1	1	0	0	0	1	1	1	1
1	1	1	0	0	0	1	1	1	1
1	1	1	0	0	0	1	1	1	1
1	1	1	0	0	0	1	1	1	1
1	1	1	0	0	0	1	1	1	1
1	1	1	1	0	1	1	1	1	1
1	1	1	1	1	0	1	1	1	1
1	1	1	0	0	0	1	1	1	1
1	1	1	0	0	0	1	1	1	1
1	1	1	0	0	0	1	1	1	1
1	1	1	0	0	0	1	1	1	1
1	1	1	0	0	0	1	1	1	1
1	1	1	0	0	0	1	1	1	1
1	1	1	0	0	0	1	1	1	1
1	1	1	0	0	0	1	1	1	1
1	1	1	0	0	0	1	1	1	1
1	1	1	0	0	0	1	1	1	1
1	1	1	0	0	0	1	1	1	1
1	1	1	0	0	0	1	1	1	1
1	1	1	0	0	0	1	1	1	1
1	1	1	0	0	0	1	1	1	1
1	1	1	0	0	0	1	1	1	1
1	1	1	0	0	0	1	1	1	1
1	1	1	0	0	0	1	1	1	1
1	1	1	0	0	0	1	1	1	1
1	1	1	0	0	0	1	1	1	1
1	1	1	0	0	0	1	1	1	1
1	1	1	0	0	0	1	1	1	1
1	1	1	0	0	0	1	1	1	1
1	1	1	0	0	0	1	1	1	1
1	1	1	0	0	0	1	1	1	1
1	1	1	0	0	0	1	1	1	1
1	1	1	0	0	0	1	1	1	1
1	1	1	0	0	0	1	1	1	1
1	1	1	0	0	0	1	1	1	1
1	1	1	0	0	0	1	1	1	1
1	1	1	0	0	0	1	1	1	1
1	1	1	0	0	0	1	1	1	1
1	1	1	0	0	0	1	1	1	1
1	1	1	0	0	0	1	1	1	1
1	1	1	0	0	0	1	1	1	1
1	1	1	0	0	0	1	1	1	1
1	1	1	0	0	0	1	1	1	1
1	1	1	0	0	0	1	1	1	1
1	1	1	0	0	0	1	1	1	1
1	1	1	0	0	0	1	1	1	1
1	1	1	0	0	0	1	1	1	1
1	1	1	0	0	0	1	1	1	1
1	1	1	0	0	0	1	1	1	1
1	1	1	0	0	0	1	1	1	1
1	1	1	0	0	0	1	1	1	1
1	1	1	0	0	0	1	1	1	1
1	1	1	0	0	0	1	1	1	1
1	1	1	0	0	0	1	1	1	1
1	1	1	0	0	1	1	1	1	1
1	1	1	0	0	0	1	1	1	1
1	1	1	0	0	0	1	1	1	1
1	1	1	0	0	0	1	1	1	1
1	1	1	0	0	0	1	1	1	1
1	1	1	0	0	0	1	1	1	1
1	1	1	0	0	0	1	1	1	1
1	1	1	0	0	0	1	1	1	1
1	1	1	0	0	0	1	1	1	1
1	1	1	0	0	0	1	1	1	1
1	1	1	0	0	0	1	1	1	1
1	1	1	0	0	0	1	1	1	1
1	1	1	0	0	0	1	1	1	1
1	1	1	0	0	0	1	1	1	1
1	1	1	0	0	0	1	1	1	1
1	1	1	0	0	0	1	1	1	1
1	1	1	0	0	0	1	1	1	1
1	1	1	0	0	0	1	1	1	1
1	1	1	0	0	0	1	1	1	1
1	1	1	0	0	0	1	1	1	1
1	1	1	0	0	0	1	1	1	1
1	1	1	0	0	0	1	1	1	1
1	1	1	0	0	0	1	1	1	1
1	1	1	0	0	0	1	1	1	1
1	1	1	0	0	1	1	1	1	1
1	1	1	0	0	0	1	1	1	1
1	1	1	0	1	0	1	1	1	1
1	1	1	0	0	0	1	1	1	1
1	1	1	0	0	0	1	1	1	1
1	1	1	0	0	1	1	1	1	1
1	1	1	0	0	0	1	1	1	1
1	1	1	0	0	0	1	1	1	1
1	1	1	0	0	0	1	1	1	1
1	1	1	0	0	0	1	1	1	1
1	1	1	0	0	1	1	1	1	1
1	1	1	0	0	0	1	1	1	1
1	1	1	0	0	0	1	1	1	1
1	1	1	0	0	1	1	1	1	1
1	1	1	0	0	1	1	1	1	1
1	1	1	0	0	1	1	1	1	1
1	1	1	0	0	0	1	1	1	1
1	1	1	0	0	0	1	1	1	1
1	1	1	1	0	0	1	1	1	1
1	1	1	0	0	0	1	1	1	1
1	1	1	0	0	0	1	1	1	1
1	1	1	0	0	0	1	1	1	1
1	1	1	0	0	0	1	1	1	1
1	1	1	0	0	0	1	1	1	1
1	1	1	0	1	0	1	1	1	1
1	1	1	0	0	0	1	1	1	1
1	1	1	0	0	0	1	1	1	1
1	1	1	0	0	0	1	1	1	1
1	1	1	0	0	0	1	1	1	1
1	1	1	0	0	0	1	1	1	1
1	1	1	0	0	0	1	1	1	1
1	1	1	0	0	1	1	1	1	1
1	1	1	0	0	0	1	1	1	1
1	1	1	0	0	0	1	1	1	1
1	1	1	0	0	0	1	1	1	1
1	1	1	0	0	0	1	1	1	1
1	1	1	0	0	0	1	1	1	1
1	1	1	0	0	1	1	1	1	1
1	1	1	0	0	0	1	1	1	1
1	1	1	0	0	0	1	1	1	1
1	1	1	0	1	0	1	1	1	1
1	1	1	0	0	0	1	1	1	1
1	1	1	0	0	0	1	1	1	1
1	1	1	0	0	0	1	1	1	1
1	1	1	0	0	0	1	1	1	1
1	1	1	0	0	0	1	1	1	1
1	1	1	0	0	0	1	1	1	1
1	1	1	0	0	0	1	1	1	1
1	1	1	0	0	0	1	1	1	1
1	1	1	0	0	0	1	1	1	1
1	1	1	0	1	0	1	1	1	1
1	1	1	0	0	0	1	1	1	1
1	1	1	0	0	0	1	1	1	1
1	1	1	0	0	0	1	1	1	1
1	1	1	0	0	1	1	1	1	1
1	1	1	0	0	0	1	1	1	1
1	1	1	0	0	0	1	1	1	1
1	1	1	0	0	0	1	1	1	1
1	1	1	0	0	0	1	1	1	1
1	1	1	0	0	0	1	1	1	1
1	1	1	0	0	0	1	1	1	1
1	1	1	0	0	0	1	1	1	1
1	1	1	0	0	0	1	1	1	1
1	1	1	0	0	1	1	1	1	1
1	1	1	0	0	1	1	1	1	1
1	1	1	0	1	0	1	1	1	1
1	1	1	0	0	0	1	1	1	1
1	1	1	0	0	0	1	1	1	1
1	1	1	0	0	1	1	1	1	1
1	1	1	0	1	0	1	1	1	1
1	1	1	0	0	0	1	1	1	1
1	1	1	0	0	0	1	1	1	1
1	1	1	0	0	0	1	1	1	1
1	1	1	0	0	0	1	1	1	1
1	1	1	0	0	0	1	1	1	1
1	1	1	0	0	0	1	1	1	1
1	1	1	0	0	1	1	1	1	1
1	1	1	0	0	1	1	1	1	1
1	1	1	0	0	0	1	1	1	1
1	1	1	0	0	0	1	1	1	1
1	1	1	0	0	0	1	1	1	1
1	1	1	0	0	0	1	1	1	1
1	1	1	0	0	1	1	1	1	1
1	1	1	0	0	0	1	1	1	1
1	1	1	0	0	1	1	1	1	1
1	1	1	0	0	0	1	1	1	1
1	1	1	0	1	1	1	1	1	1
1	1	1	0	0	1	1	1	1	1
1	1	1	0	0	1	1	1	1	1
1	1	1	0	0	1	1	1	1	1
1	1	1	0	0	1	1	1	1	1
1	1	1	0	0	1	1	1	1	1
1	1	1	1	1	1	1	1	1	1
1	1	1	0	1	1	1	1	1	1
1	1	1	0	0	1	1	1	1	1
1	1	1	0	1	1	1	1	1	1
1	1	1	0	1	1	1	1	1	1
1	1	1	0	1	1	1	1	1	1
1	1	1	0	1	1	1	1	1	1
1	1	1	0	1	1	1	1	1	1
1	1	1	0	1	1	1	1	1	1
1	1	1	0	1	1	1	1	1	1
1	1	1	0	1	1	1	1	1	1
1	1	1	0	1	1	1	1	1	1
1	1	1	0	1	1	1	1	1	1
1	1	1	0	1	1	1	1	1	1
1	1	1	0	1	1	1	1	1	1
1	1	1	0	1	1	1	1	1	1
1	1	1	0	1	1	1	1	1	1
1	1	1	0	1	1	1	1	1	1
1	1	1	0	1	1	1	1	1	1
1	1	1	0	1	1	1	1	1	1
1	1	1	0	1	1	1	1	1	1
1	1	1	0	1	1	1	1	1	1
1	1	1	0	1	1	1	1	1	1
1	1	1	0	1	1	1	1	1	1
1	1	1	0	1	1	1	1	1	1
1	1	1	0	1	1	1	1	1	1
1	1	1	0	1	1	1	1	1	1
1	1	1	0	1	1	1	1	1	1
1	1	1	1	1	1	1	1	1	1
1	1	1	0	1	1	1	1	1	1
1	1	1	0	1	1	1	1	1	1
1	1	1	1	1	1	1	1	1	1
1	1	1	0	1	1	1	1	1	1
1	1	1	0	1	1	1	1	1	1
1	1	1	0	1	1	1	1	1	1
1	1	1	0	1	1	1	1	1	1
1	1	1	0	1	1	1	1	1	1
1	1	1	0	1	1	1	1	1	1
1	1	1	0	1	1	1	1	1	1
1	1	1	0	1	1	1	1	1	1
1	1	1	0	1	1	1	1	1	1
1	1	1	0	1	1	1	1	1	1
1	1	1	0	1	1	1	1	1	1
1	1	1	0	1	1	1	1	1	1
1	1	1	0	1	1	1	1	1	1
1	1	1	0	1	1	1	1	1	1
1	1	1	0	1	1	1	1	1	1
1	1	1	0	1	1	1	1	1	1
1	1	1	0	1	1	1	1	1	1
1	1	1	0	1	1	1	1	1	1
1	1	1	0	1	1	1	1	1	1
1	1	1	0	1	1	1	1	1	1
1	1	1	0	1	1	1	1	1	1
1	1	1	0	1	1	1	1	1	1
1	1	1	0	1	1	1	1	1	1
1	1	1	0	1	1	1	1	1	1
1	1	1	0	1	1	1	1	1	1
1	1	1	0	1	1	1	1	1	1
1	1	1	0	1	1	1	1	1	1
1	1	1	0	1	1	1	1	1	1
1	1	1	0	1	1	1	1	1	1
1	1	1	0	1	1	1	1	1	1
1	1	1	0	1	1	1	1	1	1
1	1	1	0	1	1	1	1	1	1
1	1	1	0	1	1	1	1	1	1
1	1	1	0	1	1	1	1	1	1
1	1	1	0	1	1	1	1	1	1
1	1	1	0	1	1	1	1	1	1
1	1	1	0	1	1	1	1	1	1
1	1	1	0	1	1	1	1	1	1
1	1	1	0	1	1	1	1	1	1
1	1	1	0	1	1	1	1	1	1
1	1	1	0	1	1	1	1	1	1
1	1	1	0	1	1	1	1	1	1
1	1	1	1	1	1	1	1	1	1
1	1	1	0	1	1	1	1	1	1
1	1	1	0	1	1	1	1	1	1
1	1	1	0	1	1	1	1	1	1
1	1	1	0	1	1	1	1	1	1
1	1	1	0	1	1	1	1	1	1
1	1	1	0	1	1	1	1	1	1
1	1	1	0	1	1	1	1	1	1
1	1	1	0	1	1	1	1	1	1
1	1	1	0	1	1	1	1	1	1
1	1	1	0	1	1	1	1	1	1
1	1	1	0	1	1	1	1	1	1
1	1	1	0	1	1	1	1	1	1
1	1	1	0	1	1	1	1	1	1
1	1	1	0	1	1	1	1	1	1
1	1	1	0	1	1	1	1	1	1
1	1	1	0	1	1	1	1	1	1
1	1	1	0	1	1	1	1	1	1
1	1	1	0	1	1	1	1	1	1
1	1	1	0	1	1	1	1	1	1
1	1	1	0	1	1	1	1	1	1
1	1	1	0	1	1	1	1	1	1
1	1	1	0	1	1	1	1	1	1
1	1	1	0	1	1	1	1	1	1
1	1	1	0	1	1	1	1	1	1
1	1	1	0	1	1	1	1	1	1
1	1	1	0	1	1	1	1	1	1
1	1	1	0	1	1	1	1	1	1
1	1	1	0	1	1	1	1	1	1
1	1	1	0	1	1	1	1	1	1
1	1	1	0	1	1	1	1	1	1
1	1	1	1	1	1	1	1	1	1
1	1	1	0	1	1	1	1	1	1
1	1	1	0	1	1	1	1	1	1
1	1	1	0	1	1	1	1	1	1
1	1	1	0	1	1	1	1	1	1
1	1	1	0	1	1	1	1	1	1
1	1	1	0	1	1	1	1	1	1
1	1	1	0	1	1	1	1	1	1
1	1	1	0	1	1	1	1	1	1
1	1	1	0	1	1	1	1	1	1
1	1	1	0	1	1	1	1	1	1
1	1	1	0	1	1	1	1	1	1
1	1	1	0	1	1	1	1	1	1
1	1	1	0	1	1	1	1	1	1
1	1	1	0	1	1	1	1	1	1
1	1	1	0	1	1	1	1	1	1
1	1	1	0	1	1	1	1	1	1
1	1	1	0	1	1	1	1	1	1
1	1	1	0	1	1	1	1	1	1
1	1	1	0	1	1	1	1	1	1
1	1	1	0	1	1	1	1	1	1
1	1	1	0	1	1	1	1	1	1
1	1	1	0	1	1	1	1	1	1
1	1	1	0	1	1	1	1	1	1
1	1	1	0	1	1	1	1	1	1
1	1	1	0	1	1	1	1	1	1
1	1	1	0	1	1	1	1	1	1
1	1	1	0	1	1	1	1	1	1
1	1	1	1	1	1	1	1	1	1
1	1	1	0	1	1	1	1	1	1
1	1	1	0	1	1	1	1	1	1
1	1	1	0	1	1	1	1	1	1
1	1	1	0	1	1	1	1	1	1
1	1	1	0	1	1	1	1	1	1
1	1	1	0	1	1	1	1	1	1
1	1	1	0	1	1	1	1	1	1
1	1	1	0	1	1	1	1	1	1
1	1	1	0	1	1	1	1	1	1
1	1	1	1	1	1	1	1	1	1
1	1	1	0	1	1	1	1	1	1
1	1	1	1	1	1	1	1	1	1
1	1	1	1	1	1	1	1	1	1
1	1	1	0	1	1	1	1	1	1
1	1	1	0	1	1	1	1	1	1
1	1	1	1	1	1	1	1	1	1
1	1	1	1	1	1	1	1	1	1
1	1	1	1	1	1	1	1	1	1
1	1	1	1	1	1	1	1	1	1
1	1	1	1	1	1	1	1	1	1
1	1	1	1	1	1	1	1	1	1
1	1	1	1	1	1	1	1	1	1
1	1	1	1	1	1	1	1	1	1
1	1	1	1	1	1	1	1	1	1
1	1	1	1	1	1	1	1	1	1
1	1	1	1	1	1	1	1	1	1
1	1	1	1	1	1	1	1	1	1
1	1	1	1	1	1	1	1	1	1
1	1	1	1	1	1	1	1	1	1
1	1	1	1	1	1	1	1	1	1
1	1	1	1	1	1	1	1	1	1
1	1	1	1	1	1	1	1	1	1
1	1	1	1	1	1	1	1	1	1
1	1	1	1	1	1	1	1	1	1
1	1	1	1	1	1	1	1	1	1
1	1	1	1	1	1	1	1	1	1
1	1	1	1	1	1	1	1	1	1
1	1	1	1	1	1	1	1	1	1
1	1	1	1	1	1	1	1	1	1
1	1	1	1	1	1	1	1	1	1
1	1	1	1	1	1	1	1	1	1
1	1	1	1	1	1	1	1	1	1
1	1	1	1	1	1	1	1	1	1
1	1	1	1	1	1	1	1	1	1
1	1	1	1	1	1	1	1	1	1
1	1	1	1	1	1	1	1	1	1
1	1	1	1	1	1	1	1	1	1
1	1	1	1	1	1	1	1	1	1
1	1	1	1	1	1	1	1	1	1
1	1	1	1	1	1	1	1	1	1
1	1	1	1	1	1	1	1	1	1
1	1	1	1	1	1	1	1	1	1
1	1	1	1	1	1	1	1	1	1
1	1	1	1	1	1	1	1	1	1
1	1	1	1	1	1	1	1	1	1
1	1	1	1	1	1	1	1	1	1
1	1	1	1	1	1	1	1	1	1
1	1	1	1	1	1	1	1	1	1
1	1	1	1	1	1	1	1	1	1
1	1	1	1	1	1	1	1	1	1
1	1	1	1	1	1	1	1	1	1
1	1	1	1	1	1	1	1	1	1
1	1	1	1	1	1	1	1	1	1
1	1	1	1	1	1	1	1	1	1
1	1	1	1	1	1	1	1	1	1
1	1	1	1	1	1	1	1	1	1
1	1	1	1	1	1	1	1	1	1
1	1	1	1	1	1	1	1	1	1
1	1	1	1	1	1	1	1	1	1
1	1	1	1	1	1	1	1	1	1
1	1	1	1	1	1	1	1	1	1
1	1	1	1	1	1	1	1	1	1
1	1	1	1	1	1	1	1	1	1
1	1	1	1	1	1	1	1	1	1
1	1	1	1	1	1	1	1	1	1
1	1	1	1	1	1	1	1	1	1
1	1	1	1	1	1	1	1	1	1
1	1	1	1	1	1	1	1	1	1
1	1	1	1	1	1	1	1	1	1
1	1	1	1	1	1	1	1	1	1
1	1	1	1	1	1	1	1	1	1
1	1	1	1	1	1	1	1	1	1
1	1	1	1	1	1	1	1	1	1
1	1	1	1	1	1	1	1	1	1
1	1	1	1	1	1	1	1	1	1
1	1	1	1	1	1	1	1	1	1
1	1	1	1	1	1	1	1	1	1
1	1	1	1	1	1	1	1	1	1
1	1	1	1	1	1	1	1	1	1
1	1	1	1	1	1	1	1	1	1
1	1	1	1	1	1	1	1	1	1
1	1	1	1	1	1	1	1	1	1
1	1	1	1	1	1	1	1	1	1
1	1	1	1	1	1	1	1	1	1
1	1	1	1	1	1	1	1	1	1
1	1	1	1	1	1	1	1	1	1
1	1	1	1	1	1	1	1	1	1
1	1	1	1	1	1	1	1	1	1
1	1	1	1	1	1	1	1	1	1
1	1	1	1	1	1	1	1	1	1
1	1	1	1	1	1	1	1	1	1
1	1	1	1	1	1	1	1	1	1
1	1	1	1	1	1	1	1	1	1
1	1	1	1	1	1	1	1	1	1
1	1	1	1	1	1	1	1	1	1
1	1	1	1	1	1	1	1	1	1
1	1	1	1	1	1	1	1	1	1
1	1	1	1	1	1	1	1	1	1
1	1	1	1	1	1	1	1	1	1
1	1	1	1	1	1	1	1	1	1
1	1	1	1	1	1	1	1	1	1
1	1	1	1	1	1	1	1	1	1
1	1	1	1	1	1	1	1	1	1
1	1	1	1	1	1	1	1	1	1
1	1	1	1	1	1	1	1	1	1
1	1	1	1	1	1	1	1	1	1
1	1	1	1	1	1	1	1	1	1
1	1	1	1	1	1	1	1	1	1
1	1	1	1	1	1	1	1	1	1
1	1	1	1	1	1	1	1	1	1
1	1	1	1	1	1	1	1	1	1
1	1	1	1	1	1	1	1	1	1
1	1	1	1	1	1	1	1	1	1
1	1	1	1	1	1	1	1	1	1
1	1	1	1	1	1	1	1	1	1
1	1	1	1	1	1	1	1	1	1
1	1	1	1	1	1	1	1	1	1
1	1	1	1	1	1	1	1	1	1
1	1	1	1	1	1	1	1	1	1
1	1	1	1	1	1	1	1	1	1
1	1	1	1	1	1	1	1	1	1
1	1	1	1	1	1	1	1	1	1
1	1	1	1	1	1	1	1	1	1
1	1	1	1	1	1	1	1	1	1
1	1	1	1	1	1	1	1	1	1
1	1	1	1	1	1	1	1	1	1
1	1	1	1	1	1	1	1	1	1
1	1	1	1	1	1	1	1	1	1
1	1	1	1	1	1	1	1	1	1
1	1	1	1	1	1	1	1	1	1
1	1	1	1	1	1	1	1	1	1
1	1	1	1	1	1	1	1	1	1
1	1	1	1	1	1	1	1	1	1
1	1	1	1	1	1	1	1	1	1
1	1	1	1	1	1	1	1	1	1
1	1	1	1	1	1	1	1	1	1
1	1	1	1	1	1	1	1	1	1
1	1	1	1	1	1	1	1	1	1
1	1	1	1	1	1	1	1	1	1
1	1	1	1	1	1	1	1	1	1
1	1	1	1	1	1	1	1	1	1
1	1	1	1	1	1	1	1	1	1
1	1	1	1	1	1	1	1	1	1
1	1	1	1	1	1	1	1	1	1
1	1	1	1	1	1	1	1	1	1
1	1	1	1	1	1	1	1	1	1
1	1	1	1	1	1	1	1	1	1
1	1	1	1	1	1	1	1	1	1
1	1	1	1	1	1	1	1	1	1
1	1	1	1	1	1	1	1	1	1
1	1	1	1	1	1	1	1	1	1
1	1	1	1	1	1	1	1	1	1
1	1	1	1	1	1	1	1	1	1
1	1	1	1	1	1	1	1	1	1
1	1	1	1	1	1	1	1	1	1
1	1	1	1	1	1	1	1	1	1
1	1	1	1	1	1	1	1	1	1
1	1	1	1	1	1	1	1	1	1
1	1	1	1	1	1	1	1	1	1
1	1	1	1	1	1	1	1	1	1
1	1	1	1	1	1	1	1	1	1
1	1	1	1	1	1	1	1	1	1
1	1	1	1	1	1	1	1	1	1
1	1	1	1	1	1	1	1	1	1
1	1	1	1	1	1	1	1	1	1
1	1	1	1	1	1	1	1	1	1
1	1	1	1	1	1	1	1	1	1
1	1	1	1	1	1	1	1	1	1
1	1	1	1	1	1	1	1	1	1
1	1	1	1	1	1	1	1	1	1
1	1	1	1	1	1	1	1	1	1

## Sheet: hrl
0	0	0	0	0	0	0	0	0	0
0	0	0	0	0	0	0	0	0	0
0	0	0	0	0	0	0	0	0	0
0	0	0	0	0	0	0	0	0	0
0	0	0	0	0	0	0	0	0	0
0	0	0	0	0	0	0	0	0	0
0	0	0	0	0	0	0	0	0	0
1	0	0	0	0	0	0	0	0	0
0	0	0	0	0	0	0	1	0	0
0	0	0	0	0	0	0	0	0	0
0	0	0	0	0	0	0	0	0	0
0	0	0	0	0	0	0	0	0	0
0	0	0	0	0	0	0	0	0	0
0	0	0	0	0	0	0	0	0	0
0	0	0	0	0	0	0	0	0	0
0	0	0	0	0	0	0	0	0	0
0	0	0	0	0	0	0	1	0	0
0	0	0	0	0	0	0	0	0	1
0	1	0	0	0	0	0	0	1	0
0	1	0	0	0	0	0	0	0	0
0	0	0	0	0	0	0	0	0	0
0	1	0	0	0	0	0	0	0	1
0	1	0	0	0	0	0	1	1	0
0	0	0	0	0	0	0	0	1	0
0	0	0	1	0	1	0	0	0	0
0	0	0	0	0	0	1	0	0	1
0	0	0	0	0	0	0	0	0	0
0	0	0	1	1	1	0	0	0	0
0	0	0	1	0	1	1	0	0	1
0	1	0	0	0	0	0	0	0	1
0	0	0	0	0	0	0	0	0	0
0	0	0	0	0	0	1	0	0	0
0	1	0	0	0	0	0	0	0	0
0	0	0	0	0	0	0	0	0	0
0	0	0	0	0	1	0	0	1	0
0	0	0	0	0	0	0	0	0	0
0	0	0	0	1	1	0	0	0	0
0	0	0	1	0	1	0	0	1	0
0	1	0	1	0	0	0	0	0	0
0	0	0	0	0	0	0	0	0	0
1	0	1	0	0	0	0	0	0	0
1	0	0	1	0	1	0	1	0	0
0	0	0	0	0	0	1	0	0	0
0	0	0	0	0	0	1	0	0	0
0	0	0	0	1	1	0	0	0	0
0	1	0	0	0	0	0	0	0	0
0	1	0	0	0	0	0	0	0	0
0	0	0	0	0	0	0	0	0	0
0	0	0	0	0	0	0	1	0	0
0	0	0	1	0	0	0	0	0	0
0	0	0	0	1	0	0	0	1	0
0	0	0	0	0	1	0	0	0	0
0	0	0	0	0	0	0	0	0	1
1	0	1	0	1	0	1	1	0	1
0	1	0	0	0	0	0	0	0	0
1	0	0	0	1	0	0	1	0	0
0	1	1	0	0	0	0	0	1	0
1	0	0	0	1	1	0	0	0	1
0	0	0	0	0	0	0	0	1	0
0	0	0	0	0	0	0	0	1	0
1	0	0	0	0	0	0	0	0	1
0	0	0	0	0	0	0	1	0	0
0	1	0	1	0	0	1	1	0	1
0	1	0	0	1	1	0	0	0	1
1	0	0	0	0	0	0	0	1	0
0	0	1	1	0	1	0	0	0	0
1	0	0	1	0	1	0	0	0	0
1	0	1	0	0	0	0	0	0	1
0	0	0	0	1	0	0	0	0	0
1	0	0	0	0	0	1	0	0	0
0	1	0	0	0	1	1	1	0	1
0	0	0	0	0	1	0	1	0	0
0	1	1	1	0	0	1	1	0	0
0	0	0	0	0	0	0	0	0	0
0	0	1	0	0	1	1	1	0	1
0	0	0	0	0	1	1	1	1	0
0	0	0	0	0	1	0	0	0	0
0	1	1	0	1	0	1	0	0	0
0	0	0	1	1	1	0	1	0	1
0	0	0	0	0	1	0	0	0	0
0	0	0	0	0	0	0	0	0	1
0	0	0	0	1	1	0	0	0	0
0	0	1	0	0	0	0	0	0	0
0	0	0	1	1	1	1	0	0	0
1	0	1	0	0	0	0	0	1	0
0	0	0	0	1	0	1	1	0	1
0	0	0	1	0	1	0	0	1	0
0	0	0	0	0	0	1	0	0	0
0	0	0	1	0	0	1	1	0	1
1	0	0	0	0	0	1	0	0	1
0	0	0	0	0	0	0	0	0	0
0	0	0	0	0	0	0	0	0	0
0	0	0	1	1	0	0	0	1	0
0	0	0	0	0	0	1	1	0	0
0	0	0	1	0	0	0	0	0	1
0	0	0	0	0	0	0	0	1	0
0	0	0	1	0	0	0	0	0	0
0	0	1	1	0	0	0	0	0	0
0	0	0	0	0	0	0	0	0	0
0	0	1	0	1	0	0	1	0	0
0	0	0	1	1	0	0	0	0	1
0	0	0	0	0	1	0	1	1	0
0	0	0	0	1	0	0	0	1	1
0	0	0	1	0	0	0	0	0	0
0	0	1	1	0	0	1	1	0	0
0	0	0	0	1	0	1	1	0	0
0	0	0	0	1	0	0	0	0	0
1	0	0	0	0	0	0	0	0	0
0	0	1	0	0	0	0	1	0	1
0	1	0	0	0	0	0	1	0	0
0	0	1	0	1	1	0	0	0	0
0	0	0	0	0	0	0	0	0	1
0	0	0	0	0	1	0	0	0	0
1	0	0	1	0	1	0	0	1	0
0	0	1	0	0	0	0	0	1	1
1	0	1	0	0	1	0	0	1	0
0	0	0	0	1	1	1	1	1	0
0	0	0	0	0	0	1	1	0	0
0	0	1	0	1	1	0	0	1	0
0	0	0	0	1	0	1	0	0	1
0	1	1	0	0	0	1	0	0	0
0	0	0	1	0	0	0	0	0	0
0	0	0	0	0	0	0	0	0	0
0	0	1	0	0	0	0	0	0	0
1	0	1	0	0	0	0	0	0	1
0	0	0	0	0	0	0	0	1	0
0	0	0	0	0	0	1	0	1	0
0	0	0	0	0	0	1	0	0	0
0	0	0	0	0	0	0	0	0	0
0	1	0	0	1	0	0	0	1	0
0	0	0	0	0	0	0	0	0	0
1	0	1	0	0	0	0	0	0	1
0	0	0	0	0	0	0	0	0	0
0	0	1	0	1	0	0	0	0	0
0	0	1	0	1	0	1	0	0	0
0	0	0	1	0	0	0	0	0	0
1	0	0	1	0	1	0	0	0	0
0	0	0	0	0	0	0	1	0	0
0	0	0	0	0	0	0	1	0	0
0	0	0	1	0	0	1	1	0	0
0	0	1	1	1	0	0	0	0	1
0	0	0	0	0	1	0	1	0	1
0	0	1	0	1	0	0	1	0	0
0	0	0	0	0	0	1	1	1	0
0	0	0	1	0	0	0	0	0	1
1	0	1	0	1	0	0	0	0	0
1	0	1	0	0	0	1	0	1	0
0	0	0	0	1	0	1	0	0	0
1	0	0	0	0	0	1	0	0	0
0	0	0	0	0	0	0	0	0	0
0	0	1	0	1	0	0	0	0	0
0	0	0	0	0	0	0	0	0	0
0	0	0	0	0	0	0	0	0	0
1	1	0	0	0	0	1	0	0	0
0	0	0	0	0	0	0	0	0	1
0	0	1	0	0	0	0	0	1	0
0	0	0	0	0	0	0	0	0	0
0	1	1	0	0	0	0	0	0	0
0	0	1	0	0	1	0	0	0	0
0	0	0	0	0	1	0	1	0	0
0	1	0	0	0	0	0	1	0	0
1	0	0	0	1	0	0	1	1	0
0	0	0	0	0	1	0	0	0	0
0	0	0	0	0	0	0	1	0	0
0	0	0	0	0	0	0	0	1	0
0	0	0	0	0	1	1	0	1	0
0	0	0	0	1	0	0	1	0	0
1	0	0	0	0	0	1	1	0	0
0	1	0	0	0	1	1	0	0	0
1	1	1	1	0	0	0	0	0	0
0	1	0	0	0	0	0	0	0	0
0	1	0	0	1	0	1	0	0	0
0	0	1	1	0	0	0	0	1	1
1	0	0	0	1	1	0	0	0	0
0	0	0	0	0	1	0	0	0	0
1	1	1	0	0	0	0	0	0	0
0	0	1	0	0	0	0	0	1	0
0	0	0	1	0	0	0	1	1	0
1	0	1	0	0	0	0	0	0	0
1	0	0	0	1	0	0	1	0	0
1	0	1	0	1	0	0	0	0	1
1	0	1	0	0	1	0	0	0	0
0	0	0	0	0	0	1	0	1	0
1	0	0	1	0	0	0	0	0	0
0	0	1	0	0	0	1	1	0	1
0	0	0	0	0	0	1	0	0	0
0	1	0	0	0	0	0	0	0	1
0	0	1	1	0	0	0	0	0	1
1	0	0	0	0	0	0	0	0	1
0	0	1	0	1	0	0	0	0	0
0	0	0	0	1	1	0	0	0	0
1	0	0	1	0	0	0	0	1	0
1	0	0	0	0	0	1	0	1	1
0	0	0	0	1	0	0	0	0	0
0	0	1	0	0	0	0	0	1	1
0	0	0	1	0	0	0	0	0	1
0	0	0	0	0	0	0	0	0	1
1	0	0	1	1	0	1	0	1	0
1	1	1	1	0	0	0	0	0	1
0	0	1	0	1	0	0	0	0	1
0	0	1	0	0	0	1	0	0	0
0	1	0	1	1	0	1	0	0	0
0	0	1	0	0	0	1	0	0	0
1	1	0	0	0	1	0	1	1	1
1	0	1	0	1	0	1	0	1	1
0	0	0	0	1	1	0	0	0	0
1	0	1	0	0	1	0	0	0	0
0	0	1	0	0	0	0	0	1	1
0	0	1	0	0	0	0	1	0	0
1	0	1	0	1	0	1	0	0	1
0	0	0	0	0	0	1	0	1	0
0	1	0	0	1	0	1	0	1	0
1	0	0	0	0	0	1	0	1	0
1	0	0	1	0	0	0	1	0	0
0	0	0	0	0	0	0	0	0	0
0	0	1	0	0	1	1	0	1	1
0	0	0	0	0	0	0	0	0	0
0	0	0	0	0	0	0	0	0	0
1	0	0	0	0	0	0	0	1	0
0	1	1	0	0	1	1	0	0	0
1	0	0	0	1	1	0	0	0	1
0	0	0	0	0	1	0	0	0	0
0	0	1	0	1	0	1	1	0	0
0	0	1	1	0	0	0	0	1	0
0	0	0	0	1	0	1	1	0	0
0	0	0	0	0	0	0	0	0	1
0	0	0	0	0	1	1	0	1	0
0	0	0	0	0	0	1	0	0	1
0	0	0	0	0	0	0	0	1	1
1	0	0	1	0	0	0	1	0	0
0	0	0	1	1	0	0	0	1	1
0	1	0	1	1	0	0	1	0	0
0	0	0	0	0	0	0	1	0	0
1	0	0	1	0	0	0	0	1	0
0	0	0	0	0	0	0	0	1	0
0	1	0	0	0	1	0	0	1	0
0	1	1	1	1	0	0	0	1	0
0	0	0	0	1	0	0	1	1	1
1	1	0	0	1	0	1	1	0	0
0	0	0	0	0	1	1	1	0	1
0	0	0	1	1	0	0	0	1	0
0	0	0	0	0	0	0	1	0	0
0	1	0	0	0	0	1	1	0	0
0	0	0	0	0	0	1	0	0	1
0	0	0	1	1	0	0	0	0	0
0	1	0	0	0	1	1	1	1	1
0	0	0	0	0	0	0	1	0	0
0	0	0	0	0	0	0	0	1	0
0	0	1	0	1	0	0	1	0	1
1	0	0	0	0	1	0	0	0	1
0	0	0	0	1	1	0	0	0	0
0	0	1	0	0	0	0	1	1	0
1	0	0	0	0	0	0	0	0	1
1	0	0	0	0	0	0	0	0	1
0	0	0	1	0	1	1	0	0	1
0	0	0	0	0	0	0	1	0	1
0	0	1	0	1	0	0	1	0	0
0	1	1	0	1	0	0	0	0	1
0	0	0	0	0	0	0	0	0	1
0	0	0	1	1	0	0	0	0	1
0	0	0	1	1	0	0	0	0	0
0	0	1	0	1	1	0	0	0	1
0	0	0	0	0	1	1	1	0	0
0	0	0	0	1	0	0	0	0	0
0	0	1	0	0	1	0	1	0	0
0	0	0	1	0	0	0	0	0	0
1	1	0	1	0	1	1	0	0	1
0	0	0	1	0	0	0	0	0	1
0	0	0	0	0	0	0	0	0	0
1	1	1	0	1	0	0	0	0	0
0	1	0	0	1	0	1	0	1	1
1	0	0	1	1	0	0	0	0	0
0	0	1	0	0	1	0	0	0	0
1	1	0	0	0	0	0	0	0	0
1	1	0	0	1	0	0	1	0	0
0	0	0	0	0	0	0	1	0	0
0	0	0	0	1	0	0	0	0	1
1	1	0	1	0	0	0	0	0	0
0	0	1	0	1	0	1	0	0	1
0	0	1	0	0	0	1	1	0	1
0	0	0	0	0	1	0	1	0	0
0	1	0	0	0	0	0	0	0	0
0	1	1	0	0	0	0	1	0	0
0	0	0	0	1	0	1	0	0	0
0	0	1	0	0	0	0	0	0	0
1	1	0	0	0	0	0	0	1	1
0	1	1	0	1	1	0	0	0	0
0	1	1	0	0	0	0	0	0	0
0	1	0	0	0	0	0	1	0	0
1	0	0	0	1	0	0	0	1	1
0	0	0	1	0	0	0	0	0	1
0	1	0	0	0	0	0	1	0	1
0	0	1	1	1	0	0	0	0	0
1	0	0	0	0	1	1	0	0	0
0	0	1	0	1	0	0	0	1	0
0	0	0	0	0	0	0	0	0	0
0	0	1	0	0	0	0	1	0	1
0	0	0	0	1	0	1	0	0	0
0	0	1	0	1	0	0	0	0	0
0	0	1	0	1	0	1	0	0	0
0	1	0	0	0	0	0	0	0	0
1	1	0	1	0	0	1	0	0	0
0	0	0	0	1	0	0	1	1	1
1	1	1	0	1	0	0	1	0	1
0	0	0	0	0	0	0	0	0	0
0	0	0	0	0	1	1	0	0	0
1	1	0	0	0	0	0	0	0	0
1	0	0	0	0	0	0	0	0	0
0	0	0	1	0	0	0	0	0	0
0	0	0	0	1	0	1	0	0	0
0	0	0	0	1	0	0	0	0	0
0	0	0	0	0	1	0	1	0	0
0	0	1	0	0	0	0	0	0	1
0	0	1	0	0	0	0	0	0	0
0	0	0	0	0	0	1	1	0	0
0	0	0	0	0	0	0	0	0	0
0	1	0	0	0	0	1	0	0	0
0	0	0	1	0	0	0	0	0	0
1	0	0	0	1	0	0	0	0	0
0	0	0	1	0	0	0	0	0	0
1	1	0	0	0	0	0	1	0	0
0	1	1	1	0	0	1	0	1	0
0	0	0	0	1	0	0	1	0	0
0	0	1	0	0	0	1	0	0	1
0	1	0	0	0	0	0	0	0	0
0	0	0	1	0	0	0	0	1	1
0	0	0	0	0	0	0	0	0	0
0	0	0	0	0	1	1	0	0	0
0	0	0	0	1	0	0	1	0	1
0	0	1	0	0	0	0	0	0	0
0	0	0	0	0	0	0	0	1	1
0	1	1	0	0	1	1	0	1	0
0	1	0	0	0	0	1	0	0	0
0	1	0	0	0	0	0	0	0	0
1	0	0	0	0	0	0	0	0	0
0	0	1	0	0	0	1	1	0	1
0	1	0	0	1	0	0	0	0	0
0	1	0	0	0	0	1	0	0	1
0	1	0	0	0	0	0	0	0	0
0	1	0	0	0	0	0	0	0	0
1	0	0	0	0	0	1	0	0	0
0	1	0	0	1	0	0	0	0	0
1	0	0	1	0	0	0	1	1	0
0	1	1	0	0	1	0	0	1	0
0	1	0	1	0	1	0	0	0	0
0	0	0	0	0	0	0	1	1	0
0	0	0	0	0	0	1	1	0	0
0	0	1	0	0	0	1	0	0	0
0	1	0	0	0	0	0	0	1	0
1	0	0	0	0	0	0	1	0	1
0	0	1	0	0	1	0	0	1	0
0	1	0	0	0	0	0	1	0	0
0	0	0	0	0	1	0	1	0	0
0	0	0	0	0	0	1	0	1	0
0	0	0	0	0	1	0	0	1	0
0	0	1	0	0	0	1	1	1	0
0	0	0	1	0	1	0	0	0	0
0	0	0	0	0	1	0	0	0	0
1	0	1	0	0	1	0	0	0	0
0	0	0	1	0	1	0	0	0	0
0	0	0	1	0	0	0	0	0	0
1	0	0	1	0	1	0	1	1	0
0	0	0	1	1	0	1	0	0	0
1	0	0	1	0	0	0	0	1	0
0	0	0	0	0	0	0	0	0	0
1	0	1	0	1	0	0	0	1	1
1	0	0	1	0	1	0	1	0	0
1	0	0	0	0	1	0	0	1	0
0	0	0	1	0	1	0	0	0	1
1	0	0	0	0	1	1	0	0	0
0	1	1	1	0	0	0	0	0	0
0	0	1	0	0	1	0	0	0	0
0	1	0	0	0	0	0	0	0	0
0	1	0	0	1	0	0	0	1	0
0	0	1	0	0	0	0	0	0	0
0	1	0	0	0	0	0	0	0	1
0	0	0	0	0	1	0	0	1	1
0	1	0	1	0	0	0	0	0	0
0	0	1	0	0	0	0	0	0	0
0	0	1	0	1	1	0	1	0	0
1	0	1	0	0	1	0	0	0	0
1	0	0	0	0	0	0	0	1	0
0	0	1	0	1	0	1	0	0	0
0	0	1	1	0	0	1	0	0	0
1	0	1	0	0	0	0	1	0	0
0	1	0	0	0	1	0	0	0	0
0	0	0	0	0	0	0	0	0	1
1	0	0	0	0	1	0	0	0	0
0	0	0	0	0	0	0	0	1	0
0	1	0	0	0	0	0	0	0	0
1	1	1	1	0	0	0	0	0	0
0	0	1	1	0	1	0	0	0	0
0	0	0	0	0	0	1	0	0	0
0	1	0	0	0	0	0	0	0	1
1	1	0	1	1	0	0	0	0	1
1	0	0	0	0	0	1	0	0	0
1	1	1	0	1	1	0	0	0	1
1	0	0	0	0	0	0	0	1	1
1	1	0	1	0	0	0	0	0	0
0	0	0	1	0	1	1	0	0	0
1	0	0	0	1	0	0	0	0	1
0	0	0	0	0	1	0	0	1	1
0	0	1	0	1	1	0	0	0	0
0	0	0	0	1	0	0	0	1	0
1	0	0	0	0	0	0	0	0	1
0	0	1	0	0	1	0	0	0	0
0	0	0	0	0	0	0	0	0	0
0	0	0	1	1	0	0	0	0	0
0	1	0	0	0	0	0	0	0	0
1	0	0	1	0	0	1	0	0	1
0	1	0	1	0	0	0	1	0	0
0	0	0	1	0	0	0	0	0	0
1	0	0	0	0	0	0	0	1	0
0	0	0	0	0	0	0	0	1	0
0	1	0	0	0	0	1	0	1	0
0	0	0	0	0	0	1	0	0	0
0	0	1	1	1	0	1	0	0	0
1	0	0	0	0	0	0	0	0	0
0	1	0	0	0	0	0	1	0	0
0	0	0	0	0	0	0	0	0	0
0	0	0	0	0	0	1	0	1	0
0	0	1	0	0	0	0	0	0	0
0	0	0	1	0	0	0	0	0	0
0	0	0	0	1	0	1	1	0	0
0	0	0	1	0	0	0	0	1	0
1	0	0	1	0	0	0	0	0	1
0	0	1	1	0	0	0	0	0	1
0	0	0	1	0	0	1	0	0	0
0	0	0	0	0	0	0	0	0	0
1	0	1	0	0	0	1	1	0	0
1	1	0	0	0	0	0	0	0	0
1	1	0	1	0	1	0	0	1	0
1	1	0	0	0	0	0	0	1	0
0	0	0	1	0	0	0	0	0	0
0	0	0	0	1	0	1	0	1	0
0	0	0	1	0	0	1	1	0	0
0	1	0	1	0	0	0	0	0	0
0	0	0	1	0	0	1	1	0	0
1	0	0	0	0	0	1	0	0	0
0	1	0	0	1	0	0	0	0	0
0	1	1	0	0	1	0	0	0	0
0	1	0	1	0	0	0	0	0	0
1	1	1	0	1	1	1	0	0	1
0	0	1	0	0	0	1	1	0	0
0	1	0	0	0	0	0	0	0	0
0	0	1	0	0	0	0	1	0	0
0	1	0	1	0	0	0	0	0	0
0	0	1	0	0	0	0	0	0	0
1	0	0	0	0	0	0	1	0	0
0	0	0	0	0	1	1	0	0	1
1	0	1	1	0	0	0	1	0	0
1	1	0	0	0	0	0	0	0	0
0	1	0	0	0	0	1	0	1	0
0	0	0	0	0	0	0	0	0	0
1	0	0	0	1	0	0	1	0	1
0	0	1	1	0	0	0	0	0	0
0	1	0	0	0	1	0	1	1	1
0	0	0	1	0	0	0	0	0	1
0	1	0	0	1	0	0	0	0	0
0	0	0	1	0	0	1	0	0	1
1	0	1	1	0	0	0	0	0	1
0	0	1	1	1	1	0	0	0	0
0	0	1	1	1	0	0	1	0	0
0	0	0	0	0	0	0	0	0	0
0	1	0	1	0	0	1	0	0	1
0	1	0	1	0	1	0	0	0	1
0	0	0	1	1	1	0	0	0	0
0	0	0	0	0	0	1	0	0	0
1	0	0	1	0	0	0	1	0	0
0	0	0	1	0	1	0	0	0	0
0	1	0	0	0	0	0	0	0	0
1	1	0	1	1	1	1	0	0	1
0	0	0	0	1	0	1	0	0	1
0	0	0	0	0	0	0	0	0	1
0	0	0	0	0	0	0	0	0	1
0	0	0	0	0	0	0	0	1	0
1	0	0	1	0	1	0	0	0	0
1	0	0	1	0	0	0	0	0	0
0	0	0	0	1	1	0	1	0	0
0	0	0	0	0	0	0	0	0	0
1	0	0	1	0	0	0	1	0	0
0	1	0	0	1	0	0	0	0	0
0	0	0	0	0	0	0	1	0	0
0	0	0	0	1	0	0	0	0	0
0	1	0	0	1	0	0	0	0	0
0	0	0	0	0	0	0	0	0	0
1	0	1	0	1	0	0	0	0	0
0	0	0	0	0	0	0	0	1	0
0	1	1	0	0	0	0	0	0	0
0	0	1	0	0	0	1	0	0	0
0	1	0	0	0	0	0	0	0	0
0	1	0	0	0	0	0	0	0	0
0	0	1	0	1	0	1	0	1	0
0	0	0	0	0	0	0	1	0	0
0	1	0	0	0	0	0	0	0	0
0	1	0	0	0	0	1	0	0	0
0	1	0	0	1	0	1	1	0	0
1	0	0	0	0	0	0	1	0	0
0	0	0	0	1	0	0	0	0	0
0	0	0	0	0	0	0	1	0	0
0	0	0	1	0	0	0	0	1	0
0	0	0	0	1	0	1	0	0	0
0	1	0	1	0	0	0	0	0	0
0	0	0	0	0	0	0	0	0	0
1	0	0	0	1	0	0	0	0	0
0	0	0	0	0	0	0	0	0	0
0	1	0	0	1	0	0	1	0	1
0	0	0	0	0	0	1	0	1	0
1	0	0	0	0	1	0	1	0	0
0	0	0	1	0	0	0	0	0	0
0	0	0	0	0	0	0	0	0	0
1	0	0	0	0	0	0	0	0	0
0	0	0	0	1	0	0	0	0	1
0	1	0	0	1	1	1	0	0	0
1	0	0	1	1	1	1	0	0	0
1	1	0	0	0	0	0	0	0	0
0	0	0	1	1	0	1	0	0	0
1	1	0	0	0	0	0	0	0	1
0	0	0	0	1	0	1	0	1	0
0	0	0	0	1	0	1	1	0	1
0	0	0	0	0	0	0	0	0	1
0	0	0	0	0	0	0	1	0	1
0	0	0	0	0	0	0	0	0	0
0	0	1	0	1	0	1	0	0	0
0	0	1	0	0	0	0	1	0	0
1	0	0	0	1	0	1	1	0	1
0	0	0	0	0	1	0	1	0	1
1	1	0	1	1	1	1	1	0	0
0	0	1	0	1	0	0	1	0	0
0	0	0	1	0	0	0	0	0	0
0	0	0	0	1	0	1	1	0	1
1	0	0	0	0	1	0	0	0	1
0	0	0	0	0	0	1	0	0	1
0	0	0	1	1	1	0	1	1	1
0	0	0	0	0	0	0	0	0	0
0	0	0	0	0	0	1	0	0	0
0	1	0	0	1	0	0	0	0	0
0	0	0	1	0	1	0	1	1	1
0	0	0	1	1	0	0	0	0	0
0	1	0	0	1	0	1	1	0	0
0	0	0	0	0	0	1	0	0	0
1	1	0	0	0	0	0	1	0	0
0	0	0	0	0	0	0	1	0	1
1	0	0	0	0	0	0	0	0	0
0	0	0	0	0	0	1	0	0	0
0	0	0	0	1	0	1	1	0	0
0	0	0	0	0	0	0	0	0	0
0	0	1	0	0	0	1	0	0	0
0	0	1	0	0	0	0	0	0	1
0	0	0	0	0	0	0	0	0	0
0	0	1	0	0	1	0	0	0	0
0	1	0	0	0	0	0	0	0	1
0	0	0	0	0	0	1	0	0	0
0	0	0	0	0	0	0	1	0	0
0	0	0	1	1	1	0	0	0	0
0	0	0	1	0	1	0	1	0	0
0	0	0	0	0	0	0	0	0	0
1	0	1	0	0	0	0	0	0	1
0	0	1	0	0	0	0	1	0	0
0	0	1	1	0	0	0	0	0	0
1	0	0	1	1	0	0	0	0	0
1	1	0	1	1	1	1	0	0	0
1	0	0	0	0	0	0	0	0	1
0	0	0	0	0	1	0	0	0	0
0	0	1	0	0	1	0	0	0	1
0	0	0	1	1	0	0	0	0	0
0	1	0	1	0	0	1	0	0	0
1	0	0	1	0	1	0	0	0	0
0	0	1	0	0	0	0	0	0	1
0	0	1	0	0	0	0	0	0	0
0	0	0	1	1	0	0	0	0	0
0	0	0	0	1	1	0	0	0	0
0	0	1	0	0	1	0	1	0	0
0	0	0	0	0	0	0	0	0	1
0	0	0	0	0	0	1	0	0	0
0	0	0	0	0	1	0	1	0	0
0	0	0	0	0	1	0	0	0	0
0	0	0	1	0	0	0	1	1	1
0	0	0	0	0	0	0	0	0	0
1	0	0	0	0	0	0	0	0	1
0	0	1	0	0	1	1	0	1	0
0	0	0	1	0	0	0	0	0	0
0	1	0	0	0	0	0	0	0	0
0	0	0	0	0	0	0	0	0	1
0	0	0	0	0	0	0	0	0	1
0	0	1	0	0	1	0	0	0	1
0	0	0	0	0	0	1	0	0	0
1	0	0	0	0	0	1	0	0	0
0	0	1	0	1	0	1	0	0	0
0	0	0	1	0	0	0	0	0	0
0	0	0	1	1	0	0	0	0	0
0	0	0	0	1	0	0	0	0	0
0	0	0	0	0	0	0	0	0	0
0	1	0	0	0	0	0	0	0	0
0	0	0	0	0	0	1	0	0	0
0	1	0	0	0	0	0	0	0	0
0	1	0	1	0	0	0	0	1	0
0	0	0	0	1	0	0	0	0	0
1	1	0	0	1	0	0	0	0	1
0	0	0	0	1	0	1	0	0	0
1	0	1	1	0	0	1	0	0	0
0	0	0	0	0	0	1	0	0	1
0	0	0	1	0	0	0	0	0	0
0	0	0	1	0	0	0	1	0	1
0	1	1	0	0	0	0	0	1	0
0	0	0	0	1	0	0	0	0	1
0	0	0	0	0	0	0	0	1	0
0	0	0	0	1	0	0	0	1	0
0	0	0	1	0	0	0	0	0	1
0	0	0	1	0	0	1	0	0	1
0	0	0	0	1	0	0	0	0	0
1	1	0	1	0	0	0	0	0	1
0	0	0	0	1	0	0	0	0	1
0	0	1	1	0	0	0	0	0	1
0	0	0	0	1	0	0	0	1	0
0	0	1	0	0	0	0	0	1	0
0	0	1	1	0	0	0	0	0	1
1	0	0	0	0	0	0	0	0	0
0	1	0	1	1	0	1	0	0	1
0	0	0	1	0	0	0	0	0	0
0	0	1	0	1	0	0	0	1	0
0	0	0	1	0	0	0	0	0	1
0	0	0	0	0	0	0	0	1	0
0	0	0	0	1	0	1	0	0	0
0	0	1	1	0	0	0	0	1	0
0	1	0	1	0	0	0	0	0	0
0	1	0	1	1	1	0	0	0	1
0	0	0	1	0	0	0	0	0	0
0	1	0	0	0	1	0	0	0	0
0	0	0	1	1	0	0	0	1	0
0	0	0	0	0	0	0	0	1	0
0	0	1	0	0	0	0	0	0	1
0	0	0	1	0	0	0	0	0	0
0	0	0	0	0	1	1	1	0	0
0	0	1	0	0	0	0	0	1	0
0	0	0	0	0	1	0	0	0	0
0	1	0	0	1	0	0	0	1	0
0	0	0	0	1	1	0	0	1	0
0	1	0	0	0	0	1	0	0	0
0	0	0	0	0	0	0	0	0	0
0	0	0	0	0	1	0	0	1	1
0	1	0	0	0	0	0	1	1	1
0	1	1	1	0	1	0	0	0	0
0	0	1	0	0	0	0	0	1	0
0	0	0	0	0	0	0	0	0	0
0	0	0	0	0	0	0	0	0	0
0	0	0	0	0	0	0	0	0	0
0	0	0	0	0	0	0	0	0	1
0	0	0	0	0	0	0	0	0	0
0	0	0	0	0	1	1	0	0	0
1	0	0	1	0	0	1	0	1	1
0	0	1	1	0	0	0	0	0	0
0	0	0	0	0	0	0	0	1	1
1	0	0	0	1	1	0	0	0	0
1	0	1	0	0	1	1	0	0	0
0	0	1	0	0	0	0	0	0	1
0	0	1	0	1	0	0	0	0	0
0	0	1	0	0	1	0	0	0	1
0	0	0	0	0	0	1	0	1	0
1	1	0	0	0	0	0	0	0	0
0	0	1	1	1	0	0	1	0	0
1	0	1	1	1	0	1	0	0	0
0	0	1	0	0	0	0	0	1	0
1	0	1	1	0	0	1	0	0	0
0	1	0	1	0	0	0	0	0	0
0	1	0	0	0	0	0	0	0	1
0	1	0	0	0	1	0	0	0	1
0	0	0	0	0	0	0	0	0	0
0	0	0	1	1	0	0	0	1	0
1	0	0	0	0	1	0	0	1	0
0	0	1	0	1	0	0	0	0	0
0	1	0	0	1	1	0	1	0	0
0	0	0	1	1	0	0	0	1	0
0	1	1	1	1	0	0	0	0	1
0	1	1	1	1	0	0	0	1	1
0	0	0	0	1	0	0	1	0	0
0	0	1	0	0	0	0	0	0	0
0	1	1	0	0	1	0	0	0	0
0	1	1	0	0	0	0	0	1	1
0	1	0	0	0	0	0	1	1	0
0	0	0	0	0	0	0	0	1	1
0	0	0	0	1	0	0	1	1	0
0	0	0	0	0	0	0	1	0	0
1	0	0	0	0	0	0	0	0	1
0	0	0	0	0	0	0	0	0	0
0	1	1	0	0	0	0	0	0	0
1	0	0	0	0	0	0	0	1	1
1	0	0	0	0	0	0	0	0	0
0	1	1	0	0	0	0	0	0	0
0	0	0	0	0	0	0	0	1	0
0	1	0	0	1	0	0	0	0	0
0	1	1	0	0	1	0	0	1	0
1	0	0	0	0	0	1	0	0	0
0	0	0	1	0	0	0	0	1	1
1	0	0	0	1	1	0	0	0	0
0	0	0	0	0	0	0	0	1	0
0	0	0	1	1	0	0	1	0	1
0	0	0	1	0	0	0	0	0	0
0	0	0	0	0	0	0	0	0	0
0	0	0	0	0	0	1	0	0	0
0	0	0	0	0	1	0	0	1	0
0	1	0	0	0	1	1	0	1	0
0	1	1	1	0	1	0	0	0	0
0	0	0	0	0	0	0	0	0	0
0	0	0	0	0	1	0	0	1	0
0	0	0	0	1	0	0	0	1	1
0	1	0	0	0	0	0	0	0	0
1	0	0	1	1	0	0	0	0	0
0	0	0	1	0	0	0	0	0	0
1	1	0	1	1	0	0	1	0	0
1	0	0	0	0	1	1	1	0	1
0	0	0	0	0	1	0	0	1	1
1	0	1	0	0	0	0	0	0	0
0	0	0	0	0	0	0	0	0	0
0	1	0	0	1	0	1	1	1	0
0	0	0	1	0	0	0	0	1	0
0	0	0	0	0	0	0	0	1	1
0	0	1	1	1	0	0	0	0	1
0	0	0	0	0	0	0	1	1	0
0	1	0	1	0	1	1	0	0	0
0	0	1	0	0	0	0	0	0	0
0	1	0	1	0	0	0	0	0	0
0	1	0	1	1	0	0	0	0	0
0	0	0	1	0	1	0	0	1	0
0	0	0	0	1	0	1	0	0	0
0	0	1	0	0	0	1	0	0	1
1	1	1	0	0	1	0	0	0	0
0	0	1	0	1	1	0	0	0	0
1	0	0	0	0	0	0	0	1	1
0	0	0	0	1	1	0	0	0	0
0	1	0	0	0	1	0	1	0	0
0	1	0	0	0	0	0	0	1	1
1	1	0	0	1	0	0	1	0	0
0	1	0	0	0	0	1	0	0	1
0	1	0	1	1	0	0	0	0	1
0	1	0	1	1	1	0	1	1	1
0	0	1	1	0	1	0	0	1	0
0	1	0	0	0	0	0	0	0	0
0	0	1	0	0	0	0	0	0	0
0	1	0	0	1	0	0	0	1	0
0	0	0	0	0	0	0	0	1	0
0	0	0	1	0	1	0	0	0	0
0	0	1	0	0	0	1	1	1	0
0	0	0	0	0	0	0	0	0	0
0	0	0	0	0	0	1	0	0	1
0	0	0	0	0	0	0	1	0	1
0	1	1	0	0	0	0	0	0	1
0	0	1	0	0	1	0	0	1	0
0	0	1	0	1	0	0	1	1	0
0	0	1	0	1	0	0	0	1	1
0	0	1	0	0	0	0	1	0	0
0	0	0	0	0	1	0	0	1	1
0	0	0	0	0	0	0	0	0	0
1	0	1	0	1	0	1	0	1	0
0	0	0	0	0	0	1	0	0	0
0	0	1	0	0	0	0	1	0	0
0	1	0	0	0	0	0	0	0	1
1	0	0	0	0	0	0	0	0	0
0	0	1	0	1	0	0	0	0	0
0	0	1	0	0	1	0	1	1	1
1	0	0	0	0	1	0	0	0	1
0	0	0	0	0	1	0	1	0	0
0	0	1	0	0	0	0	0	0	1
0	1	0	0	0	1	0	0	0	0
1	0	0	0	0	0	1	0	0	1
0	0	0	0	0	0	0	0	0	0
1	1	0	0	0	0	0	1	0	1
0	0	0	0	1	0	0	0	0	0
0	0	0	0	0	0	0	1	0	0
0	0	1	0	0	1	0	1	0	0
0	0	0	0	0	0	1	1	0	0
1	0	0	0	0	1	0	0	0	0
0	0	1	0	0	0	1	0	0	0
1	0	0	0	1	0	0	0	0	1
0	0	0	1	0	0	0	0	0	0
1	1	0	0	1	0	0	0	0	0
0	1	1	0	0	1	0	0	0	1
1	0	0	0	0	1	0	0	0	1
0	1	1	0	1	0	1	0	0	0
0	0	0	0	0	0	1	0	0	0
0	0	0	1	0	0	0	0	1	0
0	1	0	0	0	0	0	0	0	0
0	0	0	1	0	1	0	0	0	0
0	0	0	0	1	1	0	0	0	1
0	0	0	0	0	0	0	0	0	1
0	0	1	0	0	0	0	0	0	0
0	0	0	0	0	0	1	1	0	0
0	1	0	0	0	0	0	0	0	0
0	0	0	0	0	0	0	1	0	0
0	0	0	0	0	0	1	0	0	0
0	1	0	0	0	0	0	0	1	0
0	0	0	0	0	0	0	0	0	1
0	1	0	0	0	0	1	0	0	1
0	1	1	0	0	0	0	1	0	0
0	1	0	0	1	0	0	0	0	0
0	0	0	0	1	1	0	0	0	0
0	1	0	0	1	0	0	0	1	1
1	0	0	0	0	0	0	0	0	0
0	0	0	0	0	1	1	0	0	1
1	0	0	0	1	0	0	0	0	0
0	1	0	0	0	0	1	0	0	0
0	1	0	0	0	0	0	0	0	1
0	1	0	0	0	1	0	0	0	0
0	0	0	0	0	0	1	0	0	0
0	0	1	0	0	0	0	0	0	1
0	0	0	0	0	1	0	0	0	0
0	1	0	0	1	1	1	1	0	0
0	1	0	0	0	1	0	0	1	0
1	1	0	0	0	1	0	1	0	0
0	0	1	0	1	0	0	0	1	1
0	0	0	0	1	0	0	0	0	0
0	1	0	0	0	1	0	0	0	0
1	1	1	0	0	0	0	0	0	0
0	1	0	0	0	0	0	0	0	0
0	0	0	0	0	0	0	0	0	0
0	0	0	0	0	0	0	0	0	0
0	0	1	0	1	0	1	0	1	1
0	1	0	0	0	0	0	1	0	0
0	0	0	0	0	0	1	1	0	0
0	1	0	0	0	0	0	0	1	0
0	0	0	0	0	0	1	0	0	1
0	0	1	0	1	0	0	0	0	0
0	1	0	0	1	0	0	0	0	0
0	1	0	0	0	1	0	0	0	1
0	0	0	0	0	1	0	0	0	0
0	1	0	0	0	0	0	0	1	0
0	1	1	0	1	0	0	0	1	0
1	0	1	0	0	0	1	0	0	0
0	0	0	0	0	0	1	0	0	1
1	1	0	0	1	0	1	0	0	1
1	0	0	0	1	0	0	0	1	1
0	1	1	0	1	0	0	0	0	0
0	0	1	0	1	1	0	0	0	1
0	0	0	0	0	0	0	0	1	1
0	0	0	1	0	1	1	0	0	0
0	1	1	0	1	0	0	0	0	1
0	1	0	0	0	0	1	0	1	0
0	1	0	0	1	0	0	0	0	0
0	0	0	0	0	0	1	0	0	1
0	0	1	0	0	0	0	0	0	0
0	0	0	0	0	0	0	1	0	0
1	0	0	0	0	1	0	0	0	1
1	1	0	0	0	0	0	0	0	0
0	0	0	0	1	1	1	0	0	1
0	0	1	1	1	1	0	1	0	1
1	1	0	0	1	1	0	0	0	0
1	1	0	0	1	0	0	0	0	0
0	1	0	0	0	0	0	0	0	0
0	0	0	0	0	0	0	0	0	0
0	0	0	0	0	0	0	0	1	0
0	1	0	0	0	0	1	0	1	0
0	1	0	1	0	0	0	0	0	0
0	0	0	0	0	0	0	0	0	0
0	0	0	0	1	1	0	0	0	1
0	1	0	0	0	1	0	1	0	0
1	0	0	0	0	0	1	0	1	0
0	0	1	0	0	0	1	0	0	0
1	0	0	0	0	0	1	0	0	0
1	0	0	0	0	0	0	0	0	0
1	1	0	0	1	0	0	0	1	0
0	1	0	1	0	0	0	0	1	0
0	0	0	0	0	0	0	0	0	0
0	0	1	0	0	0	0	0	0	1
0	1	0	1	0	0	0	0	0	0
0	0	0	0	1	1	0	0	0	0
1	0	0	0	0	0	0	1	0	0
0	1	0	0	1	0	0	1	0	0
0	0	0	1	1	0	0	0	1	0
0	0	0	0	0	0	0	0	1	0
0	0	0	0	0	0	0	0	0	0
0	0	0	0	0	0	0	1	0	0
0	0	1	0	0	0	0	0	0	1
0	0	0	1	0	1	0	0	0	1
0	1	0	0	0	0	0	0	0	0
1	1	0	0	1	0	0	0	0	1
0	0	0	0	0	0	0	0	1	0
0	0	0	0	1	0	0	0	1	0
0	0	0	0	0	1	0	0	0	0
0	0	0	0	0	0	0	0	0	0
1	0	0	0	0	0	0	0	0	0
0	0	0	0	0	0	0	0	0	0
0	0	0	0	1	0	0	0	0	0
0	0	0	0	0	0	0	0	0	1
0	0	0	0	1	1	0	0	0	0
0	0	0	1	0	0	0	0	0	0
0	0	0	0	0	0	1	0	0	1
0	0	0	0	0	0	1	0	0	1
0	0	1	0	1	0	0	0	0	0
0	0	0	0	1	0	0	0	0	0
0	1	1	1	1	1	0	1	0	1
0	0	0	0	0	0	0	0	0	1
1	1	0	0	0	0	0	0	1	1
1	0	1	0	1	0	1	0	0	1
0	0	0	0	1	0	0	0	0	1
0	0	0	1	0	0	0	1	0	0
0	0	0	0	0	0	0	0	0	1
0	0	0	0	1	0	1	0	0	1
0	0	0	0	0	0	0	0	0	0
0	0	0	0	0	0	1	0	0	1
0	0	1	0	1	0	0	0	0	0
0	0	0	1	0	0	1	0	0	0
1	0	0	0	1	0	0	0	0	0
0	0	0	0	1	0	0	0	0	0
0	0	0	1	1	0	0	1	0	0
0	0	1	0	1	0	0	0	0	0
0	0	0	0	0	0	0	0	0	0
0	0	0	0	0	0	1	0	0	0
0	1	0	1	0	0	1	1	1	0
0	0	0	1	0	1	0	1	0	1
0	0	0	0	0	0	0	0	0	0
1	0	0	1	0	0	0	0	0	0
0	0	0	0	1	0	0	0	0	0
0	0	0	0	0	0	0	0	0	0
0	0	0	0	1	0	1	0	0	0
0	0	1	0	1	1	1	0	0	0
0	0	1	0	0	0	1	0	0	0
0	0	0	0	0	0	0	0	0	0
0	0	0	1	0	0	0	0	0	1
0	0	0	0	1	1	0	0	1	0
1	0	1	0	0	0	0	0	0	0
0	0	1	0	0	0	0	0	0	0
0	0	0	1	0	0	0	0	0	1
0	0	0	0	1	1	0	1	0	1
0	0	0	1	0	0	1	0	0	1
0	0	0	0	0	1	1	1	0	1
0	0	0	1	1	0	0	0	0	0
0	0	0	1	1	0	1	0	0	0
0	0	0	1	0	0	1	0	0	1
0	0	0	1	0	0	0	0	0	0
0	0	1	0	0	1	0	0	0	1
0	0	0	1	0	1	0	0	0	1
0	0	0	0	0	0	0	1	0	1
0	0	0	0	1	0	0	1	0	1
0	0	0	1	0	0	1	0	0	1
0	0	0	0	0	1	0	0	0	1
0	0	0	1	0	0	1	0	1	0
0	0	0	0	0	0	0	0	0	0
0	0	0	0	0	0	1	0	0	0
0	0	0	0	0	0	0	0	0	0
0	0	0	1	1	0	0	1	0	1
0	0	0	1	1	0	1	0	0	1
0	0	0	0	1	0	1	0	0	0
0	0	1	0	0	0	0	0	0	0
1	0	1	0	0	0	0	1	0	0
0	0	1	0	0	0	1	1	0	0
0	1	0	0	0	0	1	0	0	1
0	0	0	0	0	1	1	0	0	0
1	0	0	0	0	0	1	0	0	0
0	0	1	0	1	0	0	0	0	1
0	0	1	1	0	0	1	0	0	0
0	0	0	0	0	0	0	1	0	0
0	0	0	1	1	0	0	0	1	0
0	0	1	0	0	0	0	1	0	1
0	0	0	1	1	1	0	0	0	1
0	0	1	0	0	0	0	0	0	0
0	0	1	0	0	0	0	0	0	1
0	0	1	0	0	0	0	0	0	0
0	0	0	1	0	1	0	1	0	0
0	0	0	1	0	0	0	0	0	1
0	0	1	0	1	0	0	0	0	1
1	0	0	0	1	0	0	0	0	0
1	0	0	0	1	1	0	0	0	0
0	0	0	0	0	0	1	0	0	0
0	0	0	1	0	0	1	1	0	0
0	0	0	0	0	0	1	0	0	0
0	0	1	1	0	0	0	0	0	0
0	0	0	0	1	0	0	0	0	0
0	0	0	0	1	0	0	0	0	0
0	0	0	0	1	1	0	1	0	0
1	0	0	0	0	0	0	0	0	0
0	0	0	0	1	0	0	0	0	0
0	0	0	0	1	0	0	0	0	1
0	0	0	0	0	0	0	0	0	1
0	0	1	1	0	1	0	0	0	0
0	0	0	0	0	0	0	0	0	0
0	0	0	1	0	0	0	0	0	0
0	0	0	0	1	0	0	0	0	0
0	0	1	0	0	1	0	0	0	0
0	0	0	0	0	0	0	1	1	0
0	0	1	0	0	0	0	1	0	1
0	1	0	0	0	0	1	0	1	0
0	0	0	1	0	0	0	0	0	0
0	0	0	0	1	0	0	0	0	1
0	0	0	0	1	0	0	0	1	0
0	0	1	0	0	0	0	0	0	1
0	0	0	0	1	0	1	0	0	1
1	0	1	1	1	0	0	0	0	0
0	0	0	0	1	0	0	0	1	0
0	0	0	0	1	0	0	0	1	1
0	0	0	0	1	0	0	0	0	0
0	1	0	1	1	0	0	1	0	0
0	0	0	1	1	0	1	0	0	1
1	0	1	0	0	0	0	0	0	0
0	1	0	0	1	0	0	1	1	0
0	0	0	0	1	0	1	0	0	0
0	0	0	1	0	0	0	0	0	0
0	0	0	0	0	0	0	0	0	0
1	0	0	0	0	0	0	0	0	0
0	1	0	0	1	0	1	0	0	0
0	0	0	0	0	0	1	0	0	1

## Sheet: qlearn
0	0	0	1	0	0	0	0	0	0
1	0	0	0	1	0	0	0	1	0
1	0	0	0	0	1	0	0	0	0
1	1	0	0	0	0	0	0	0	0
0	1	0	0	0	1	0	1	0	0
0	0	1	0	1	0	1	1	0	0
0	0	0	1	0	0	0	0	0	1
0	0	0	0	0	0	1	0	1	1
0	0	0	1	0	1	0	1	0	0
0	0	1	1	1	0	0	0	0	0
1	1	0	1	0	0	0	0	0	0
0	1	0	0	1	0	0	1	0	1
0	0	1	0	0	0	0	0	0	1
1	0	0	0	0	0	1	0	1	0
0	1	0	0	1	0	0	0	0	1
0	0	0	1	0	0	0	1	0	0
0	0	0	1	1	1	0	1	0	0
0	0	1	0	0	1	0	1	1	0
0	0	0	1	0	0	0	0	0	0
0	0	0	0	0	0	0	0	0	0
0	1	0	0	0	1	1	0	0	1
1	1	0	0	1	0	0	0	0	1
1	0	0	0	0	0	0	0	0	0
0	0	1	1	0	0	0	1	0	0
0	0	1	0	0	0	0	1	0	0
1	0	0	1	0	1	0	0	1	0
0	0	0	0	0	1	0	0	1	0
1	0	0	0	0	0	0	0	0	1
0	0	0	0	0	0	0	1	0	0
0	1	0	0	0	0	0	0	1	0
0	0	1	0	0	0	1	1	1	1
0	1	0	1	0	0	0	0	1	0
0	0	0	0	0	0	0	0	0	0
0	1	0	0	0	0	0	0	1	0
0	0	1	0	0	0	0	0	1	0
1	0	0	0	0	0	0	0	1	0
0	0	0	0	0	1	0	0	0	1
0	1	0	0	0	0	1	0	1	0
1	1	1	1	0	1	0	0	0	0
0	0	0	0	0	0	0	0	0	0
0	0	0	0	0	0	1	0	1	0
1	0	1	0	0	0	0	0	0	1
0	0	0	0	0	1	1	0	1	0
1	0	0	0	1	0	0	0	0	0
0	0	1	0	0	0	1	0	1	1
1	0	1	0	0	0	1	1	0	0
0	0	1	0	0	0	0	0	0	0
0	0	0	0	0	0	1	0	1	0
0	0	0	0	1	0	1	0	0	0
1	0	0	0	0	0	0	0	0	0
1	0	0	1	0	0	0	0	0	0
0	0	0	0	0	0	1	1	0	0
0	1	1	0	0	0	1	1	1	0
0	1	1	1	0	0	0	1	0	0
1	0	0	1	1	1	0	1	0	0
0	0	1	0	1	0	0	0	0	0
0	1	0	1	0	0	0	0	0	1
0	0	0	1	0	0	0	1	0	1
0	0	0	1	1	0	0	0	0	0
0	0	0	0	0	0	1	0	0	1
1	0	0	1	0	1	0	0	0	1
0	0	1	0	0	0	0	1	0	0
0	0	0	1	0	0	1	1	0	1
0	0	0	1	0	1	0	0	1	0
1	0	1	0	0	1	1	0	1	0
0	0	0	0	0	0	0	0	0	1
1	0	0	0	0	0	1	0	0	0
0	0	0	0	0	0	1	1	1	1
0	0	1	0	0	0	0	0	1	1
0	0	1	1	0	0	0	0	0	0
0	1	0	0	0	1	0	0	1	1
0	1	0	1	1	1	0	0	0	0
0	0	1	0	0	0	1	0	0	0
0	0	0	0	0	1	1	1	0	0
0	0	0	0	1	1	0	0	1	1
1	1	0	0	0	1	1	1	0	0
1	0	0	0	0	1	0	0	0	1
1	0	0	1	1	0	0	1	1	0
0	0	0	1	0	1	0	0	1	1
1	1	0	1	0	0	1	0	1	1
0	0	0	0	1	0	1	0	1	0
0	0	0	1	1	1	0	1	0	1
1	0	0	1	0	1	0	0	0	0
0	0	0	0	1	1	0	0	0	0
0	0	0	1	1	0	0	0	0	0
1	0	1	0	0	0	0	1	1	0
1	0	0	0	0	0	0	1	0	0
0	1	0	0	0	1	1	0	0	1
0	1	0	0	1	0	0	1	0	0
0	0	1	0	1	0	1	1	0	0
0	1	1	1	1	1	0	0	0	1
0	0	0	1	0	0	0	0	1	0
0	0	0	0	0	1	0	0	1	0
0	0	0	0	1	0	0	1	0	0
1	1	0	0	0	1	0	1	0	0
0	0	0	1	0	0	0	0	0	0
0	0	0	1	0	1	0	1	1	0
0	0	0	1	0	1	1	0	0	1
0	0	0	0	0	0	0	1	0	0
0	0	0	0	1	0	0	0	1	0
1	0	0	1	1	0	0	1	1	0
1	0	1	0	0	0	0	1	1	0
1	1	1	0	0	1	1	1	0	0
0	0	0	0	1	0	0	1	1	0
0	1	0	0	0	0	0	0	0	1
0	0	0	1	0	0	0	1	0	1
0	0	0	1	0	0	0	0	1	0
0	0	1	0	1	1	0	1	0	1
1	1	0	0	1	1	0	1	0	0
1	0	1	1	0	1	0	1	0	1
0	0	0	0	0	0	0	1	0	0
0	0	0	1	0	1	0	0	0	1
1	0	0	0	0	0	0	1	0	0
0	0	0	0	0	0	1	1	0	0
1	1	0	0	0	0	0	1	1	0
0	1	0	0	0	0	0	1	0	0
0	1	0	0	0	0	0	1	0	0
1	0	1	0	1	0	0	0	0	0
0	0	0	1	0	0	0	1	1	1
1	0	1	0	0	0	0	1	1	0
0	1	1	0	0	0	1	1	0	0
0	0	0	1	0	0	0	0	0	0
0	0	1	1	0	0	0	1	1	1
0	1	0	1	0	0	0	0	1	0
0	0	1	1	1	1	1	1	0	0
1	0	0	0	1	0	1	0	0	0
0	1	0	0	1	0	0	1	1	1
0	0	0	0	0	1	0	0	0	0
0	0	0	0	0	1	1	0	0	1
1	0	1	1	0	0	0	0	1	0
0	0	0	0	1	0	0	1	0	1
0	1	0	0	0	1	0	1	1	0
1	0	1	0	1	1	0	0	0	0
1	0	0	0	0	0	0	1	1	0
0	1	1	0	0	0	0	1	0	0
0	0	0	0	1	0	1	1	1	1
0	1	1	0	0	0	1	0	1	0
0	0	0	0	1	1	0	0	0	1
0	0	1	1	0	1	0	1	0	0
0	1	0	0	0	1	1	0	1	1
0	0	0	0	0	0	0	0	0	0
0	1	0	0	1	0	0	0	1	0
0	1	1	0	0	0	0	1	0	0
1	0	1	0	0	0	0	0	1	1
0	1	0	1	0	0	1	1	1	0
1	1	0	1	0	1	0	1	0	1
0	1	0	1	0	0	0	0	1	0
0	1	1	1	1	1	0	0	1	0
0	0	0	1	0	0	0	1	1	0
0	1	1	0	1	0	1	0	0	0
1	0	0	0	0	1	1	0	1	0
0	0	0	1	0	1	0	0	1	0
0	1	0	0	0	0	0	1	0	0
1	0	0	1	0	0	0	1	0	0
0	0	0	0	1	0	1	0	0	1
0	0	1	1	0	1	1	0	0	1
0	0	0	1	0	0	0	0	0	0
1	0	0	0	1	0	0	0	0	0
0	0	0	0	0	0	0	1	0	1
0	0	0	0	0	0	0	1	1	1
1	1	0	0	1	0	1	0	1	0
1	1	0	0	0	0	1	1	1	1
0	0	1	0	1	1	0	0	0	1
1	0	0	0	0	1	0	0	0	0
0	0	0	0	1	1	0	0	0	0
0	0	1	0	0	0	0	0	0	0
1	1	0	0	0	1	1	1	1	0
0	1	1	1	0	0	0	0	1	1
0	1	1	0	0	1	0	0	1	1
0	0	0	0	1	0	0	0	0	0
1	1	0	1	0	1	0	0	1	0
0	0	0	1	0	1	0	0	0	0
0	0	1	0	0	1	0	0	0	0
0	0	1	1	0	0	1	0	0	1
0	1	0	0	0	1	0	0	0	1
1	0	0	0	1	0	0	0	1	1
0	1	1	1	1	0	1	0	0	0
0	1	0	1	1	0	0	0	0	0
1	0	0	0	0	0	1	1	0	1
0	1	0	0	0	0	0	0	1	0
1	0	1	0	1	1	0	1	0	0
0	0	0	0	0	1	1	0	0	1
0	0	0	0	0	0	1	0	1	0
0	0	0	0	1	0	0	1	0	0
0	0	0	1	0	0	1	0	0	1
0	0	0	0	1	0	0	0	0	1
0	0	0	0	0	1	0	1	1	1
1	0	0	0	1	0	0	0	1	0
0	0	0	1	0	0	1	0	0	0
1	1	0	0	0	0	0	1	0	1
1	0	0	0	0	0	0	1	1	1
1	1	1	1	1	1	0	1	0	0
0	0	1	0	0	1	0	1	0	1
0	0	0	0	0	0	0	0	0	0
0	1	0	0	0	1	1	1	1	0
0	0	0	0	1	1	1	1	1	0
0	1	0	0	0	1	0	1	1	0
0	0	0	0	1	0	0	0	1	1
0	1	1	1	0	0	0	0	0	1
0	1	1	0	0	0	0	0	0	0
0	0	0	1	0	0	0	0	0	0
1	0	1	0	0	0	0	1	0	0
0	0	0	1	1	1	1	0	1	1
1	0	0	1	0	1	1	1	1	0
0	1	1	0	0	1	0	1	0	1
0	0	0	1	0	0	0	0	1	1
0	0	1	1	0	0	0	0	1	0
1	1	0	0	0	1	0	1	1	0
0	0	0	0	0	0	0	1	1	1
0	0	0	1	0	0	0	1	0	0
0	0	1	1	1	0	1	1	1	0
0	0	0	1	1	0	0	1	0	0
0	0	1	1	0	0	1	0	0	0
0	0	0	0	0	1	1	0	1	1
0	1	0	0	1	1	0	0	0	1
0	0	0	0	0	0	0	1	0	0
1	1	0	0	1	0	0	1	1	0
1	1	0	0	1	1	0	0	1	0
0	0	1	0	0	0	0	0	0	0
0	0	1	0	0	1	0	1	0	1
0	0	0	0	0	0	1	1	0	0
0	1	0	1	0	1	1	1	0	0
0	0	0	0	0	1	0	0	0	1
0	1	0	1	0	0	0	1	1	1
0	1	0	0	0	0	0	0	0	0
0	0	0	0	0	0	0	0	0	0
0	0	0	0	1	0	1	1	1	0
0	1	0	0	1	1	0	0	0	0
1	0	0	0	1	0	0	0	0	0
0	0	0	0	0	1	0	0	1	0
0	0	0	1	0	1	0	0	1	0
0	0	0	0	0	0	0	1	0	1
1	0	0	0	0	0	1	0	0	0
0	1	0	1	1	0	0	1	0	1
0	1	0	0	1	0	1	1	0	1
0	0	1	1	0	0	1	0	1	1
1	1	0	1	0	0	1	1	0	1
1	0	1	1	0	1	0	0	1	0
1	1	0	0	1	1	1	0	0	0
0	0	0	1	0	0	0	1	1	0
0	0	1	1	1	1	0	0	0	0
0	0	0	1	0	0	1	0	0	0
0	0	0	0	0	0	1	1	1	0
0	1	1	1	1	0	0	0	0	0
0	1	0	1	0	0	0	0	1	1
0	1	0	0	1	0	1	0	1	0
1	1	0	0	0	0	1	0	1	0
1	0	1	0	1	1	0	0	0	0
0	0	1	0	1	1	1	0	0	1
0	1	0	1	0	0	0	1	0	0
0	0	0	0	1	0	1	0	1	1
1	1	1	0	0	0	0	1	0	0
0	1	1	1	0	0	0	1	0	0
0	1	1	0	0	1	1	0	1	0
0	0	0	1	1	0	1	0	0	1
1	0	1	1	0	0	0	0	1	0
0	0	0	0	1	1	1	0	1	0
1	0	0	1	1	0	1	1	0	0
0	0	0	0	1	0	0	0	1	0
0	1	0	0	0	1	0	1	0	1
0	0	0	1	0	0	0	0	0	0
0	0	0	1	0	0	1	1	1	0
1	0	0	0	1	0	1	0	1	0
0	1	0	1	0	0	0	1	0	1
0	1	1	1	1	1	0	0	0	0
1	0	0	0	0	0	0	1	0	1
0	0	0	0	1	1	1	0	1	0
0	0	1	1	1	1	0	1	0	0
0	1	1	1	0	1	1	0	1	0
1	0	1	1	1	0	0	1	1	1
0	0	1	0	0	1	0	0	0	1
0	0	0	0	0	0	1	1	1	0
0	1	0	1	0	0	1	1	0	0
0	0	1	0	0	0	1	0	0	0
0	0	0	0	1	1	0	1	1	1
0	0	0	1	0	1	1	0	1	0
1	1	1	0	0	1	0	0	0	0
0	0	0	1	1	0	1	0	1	0
0	0	1	0	0	1	1	0	0	0
0	1	0	0	0	1	0	0	1	1
0	0	0	0	0	0	0	0	0	0
0	0	0	1	0	1	1	1	1	0
0	0	1	0	0	0	0	0	0	1
0	0	1	1	0	0	0	0	0	0
1	0	0	0	0	1	0	1	1	0
1	0	1	0	1	1	0	0	1	1
0	0	0	0	1	0	0	0	0	1
0	1	0	1	0	1	1	0	0	0
0	0	1	0	0	1	0	0	0	0
0	1	0	1	0	1	0	1	1	0
0	0	0	1	0	0	0	1	1	1
0	1	0	1	1	0	0	0	0	0
1	0	0	1	0	0	0	0	1	0
0	0	1	1	1	1	0	0	1	1
0	0	0	0	1	0	0	0	1	0
0	0	0	0	0	0	0	0	1	1
0	1	0	0	0	0	0	0	0	1
0	0	0	1	0	1	0	0	0	0
1	0	1	0	1	0	1	1	1	1
0	1	1	0	0	1	0	0	1	0
0	0	0	0	0	0	1	0	1	1
0	0	0	0	0	0	1	0	1	0
0	0	1	0	0	0	0	0	1	0
1	0	0	1	0	0	1	0	1	0
1	1	0	0	0	0	1	0	1	0
1	0	0	0	0	0	0	1	1	1
0	1	0	0	1	0	0	0	1	1
0	1	1	1	0	1	0	0	0	1
0	0	1	1	1	0	1	0	0	0
0	0	0	1	0	0	0	1	0	0
0	0	0	0	0	0	0	1	1	0
1	1	0	1	1	1	0	0	0	1
0	0	0	0	1	0	0	0	1	1
0	1	0	0	1	0	0	0	0	0
1	0	0	0	0	1	0	1	0	0
1	0	1	0	1	0	0	0	0	1
0	1	0	0	0	0	1	0	1	1
0	0	1	0	1	0	1	0	1	1
0	0	0	0	0	1	1	1	1	1
0	0	0	0	1	0	0	0	1	1
0	0	0	1	1	0	0	0	1	1
0	0	0	0	1	0	0	0	0	0
0	1	0	1	1	0	0	0	0	0
0	1	1	1	1	0	0	0	1	0
0	1	1	1	0	0	1	0	0	0
1	1	0	0	0	0	0	0	0	0
0	1	1	0	0	1	0	0	0	0
1	0	0	0	0	0	0	1	1	0
0	0	1	0	0	0	0	0	0	0
0	1	0	0	0	0	0	1	1	0
0	0	0	0	0	1	0	1	0	0
0	0	1	0	0	1	1	1	0	0
0	1	0	0	1	0	0	1	0	0
0	0	0	0	0	0	0	0	0	0
0	1	1	0	0	0	1	1	1	0
0	1	0	0	1	0	1	0	0	0
0	0	0	1	1	0	0	0	1	1
0	0	0	0	0	0	0	0	1	1
0	1	0	0	0	0	1	0	0	1
0	0	0	1	0	0	1	0	0	1
0	0	0	1	0	0	0	0	0	0
0	0	1	0	0	0	0	0	0	0
0	0	0	0	0	0	0	1	1	0
0	0	0	0	0	0	0	1	0	0
0	1	0	0	0	0	0	0	1	0
0	1	0	0	0	0	0	0	1	0
0	1	0	1	1	0	0	0	1	1
0	0	0	0	1	0	0	0	1	0
1	1	0	0	0	0	0	0	0	1
0	1	1	0	1	0	0	0	0	0
1	0	0	0	1	0	1	1	0	1
0	0	0	0	1	1	0	0	0	0
0	0	1	0	0	0	0	0	0	0
0	1	0	0	0	0	1	1	0	0
0	1	0	1	0	0	0	0	0	1
0	0	1	0	0	0	0	1	0	1
1	0	0	0	0	0	0	0	0	0
1	0	0	1	0	0	0	1	0	0
0	0	0	0	0	1	0	0	1	0
1	0	1	0	1	0	0	1	1	0
0	0	0	0	1	1	1	0	1	1
0	0	0	0	0	0	1	1	0	0
0	1	0	0	0	0	0	0	1	0
1	1	0	0	0	0	0	1	0	0
1	0	0	0	0	0	0	1	1	0
1	0	1	1	0	1	0	0	0	0
0	0	1	0	0	0	1	1	0	0
0	0	0	0	0	0	0	0	1	0
0	1	1	0	1	1	1	0	1	0
0	0	0	0	1	0	0	0	0	0
1	0	0	0	0	1	0	1	0	0
0	1	0	0	0	1	0	1	0	0
0	1	1	0	0	0	1	0	0	0
0	1	1	0	0	0	0	0	1	0
0	0	0	1	0	0	1	1	1	0
1	0	0	0	0	1	0	0	0	0
0	0	0	0	0	0	0	0	0	1
0	1	0	1	0	0	0	1	1	0
0	0	0	0	0	0	0	0	1	1
0	1	0	0	0	0	0	0	1	0
0	0	0	1	0	1	0	0	0	0
0	0	1	1	0	0	1	0	1	0
1	0	0	1	0	1	0	0	0	0
0	1	0	1	0	0	0	0	1	1
0	0	0	0	1	0	0	0	1	1
0	0	0	0	0	0	0	0	1	0
0	0	1	1	0	0	0	0	0	1
0	0	1	0	0	1	0	0	0	1
0	0	1	0	1	0	0	1	0	1
0	0	1	0	0	0	1	0	1	0
0	0	0	0	0	0	0	1	1	0
1	0	0	0	0	1	0	0	0	0
1	0	0	1	0	0	0	0	1	0
1	0	0	0	0	1	0	0	0	0
0	1	0	0	0	0	1	0	0	0
0	0	0	1	0	0	1	1	0	0
1	0	0	0	0	0	1	0	0	0
0	1	0	0	0	1	0	0	0	0
0	1	0	1	1	0	0	0	1	0
0	0	0	1	0	0	1	0	1	0
0	0	0	0	0	0	1	0	0	0
0	0	0	1	0	1	1	0	0	1
0	0	0	0	0	0	0	0	0	1
0	1	1	0	0	0	0	0	1	0
0	1	0	0	0	0	1	0	0	1
0	0	0	1	0	0	0	0	1	0
0	0	0	0	0	0	0	0	0	0
0	0	0	0	0	0	1	0	1	1
0	0	0	0	0	1	0	0	0	0
1	0	0	0	0	0	0	1	0	0
0	0	0	1	1	1	0	0	0	0
0	0	0	1	1	0	0	0	0	1
0	0	1	0	0	0	1	0	1	1
0	0	1	0	0	1	0	1	1	0
0	0	0	0	0	1	1	1	0	0
0	1	1	1	0	0	1	0	1	0
0	0	0	0	0	0	0	0	0	1
0	1	0	0	0	1	0	1	0	0
0	1	0	0	0	1	0	1	0	1
1	0	0	0	0	0	1	1	0	1
0	0	0	0	0	1	0	0	0	1
0	0	0	0	1	1	1	0	0	0
0	1	0	0	0	1	0	0	0	1
0	0	0	1	0	0	0	0	1	0
1	0	1	0	0	1	0	0	0	0
0	0	0	1	1	0	0	1	1	0
0	1	1	1	0	1	0	0	0	0
0	1	0	1	0	1	1	1	1	0
1	0	0	0	1	0	1	1	0	1
0	0	0	1	1	1	0	1	0	0
0	1	0	0	1	0	0	0	0	1
1	0	0	0	0	0	0	0	0	1
0	0	0	0	0	0	1	1	0	1
0	0	0	1	0	1	0	1	1	0
1	0	0	0	0	0	1	0	0	1
0	0	1	0	0	0	0	1	0	0
0	0	0	1	1	0	0	0	0	0
0	1	0	1	0	0	0	0	1	1
0	0	1	1	0	0	0	1	0	0
0	1	0	0	0	0	1	0	0	0
0	0	1	0	0	0	1	1	0	0
0	0	0	0	0	1	1	0	0	1
0	0	0	1	1	0	0	1	0	1
0	0	0	0	0	0	0	0	0	0
0	0	0	0	0	0	0	1	0	0
1	0	1	0	0	0	1	1	0	0
0	0	1	1	1	1	0	0	1	0
0	0	1	0	1	1	1	0	1	0
0	1	0	0	0	0	1	1	1	0
0	0	0	0	0	1	1	0	0	0
0	1	1	0	1	0	0	0	0	0
1	1	0	0	1	1	1	0	1	0
0	1	1	1	0	0	1	0	0	1
0	0	0	0	0	0	0	0	0	0
0	0	0	1	0	0	0	0	0	0
1	0	0	1	0	1	0	0	1	0
0	1	0	0	0	1	1	0	0	1
0	0	0	0	1	0	0	1	0	0
0	1	0	0	0	0	0	1	1	0
0	0	0	0	1	0	1	0	0	0
0	0	1	0	1	0	1	0	0	0
0	0	0	1	0	0	0	0	0	0
0	1	1	0	0	0	0	0	0	1
0	1	0	0	1	0	0	0	0	0
0	0	0	0	0	1	1	0	0	0
0	0	0	0	0	0	0	0	0	0
0	0	0	0	0	1	0	0	0	0
0	0	0	1	0	0	0	0	0	0
0	0	0	0	0	0	0	0	1	1
0	0	1	0	0	0	0	0	0	0
0	0	0	0	0	0	0	0	0	1
0	0	0	1	0	0	0	1	0	1
0	1	0	0	0	0	1	0	0	0
1	0	0	1	0	0	0	0	1	0
0	0	0	0	0	1	1	1	1	0
0	0	0	0	0	1	1	0	0	0
0	0	0	0	0	0	0	1	1	1
0	1	1	0	0	0	0	0	0	0
0	0	0	0	0	0	0	0	1	0
0	0	0	0	0	0	0	0	0	0
0	0	1	0	1	0	1	1	0	1
0	1	0	1	0	1	0	0	0	0
1	0	1	0	0	0	0	0	0	1
1	0	0	0	0	1	1	0	0	1
0	0	1	1	0	0	1	1	0	0
0	0	1	1	1	0	1	1	0	0
0	1	0	0	0	0	1	1	0	1
0	0	0	0	0	1	0	0	1	0
0	0	0	1	1	0	0	0	1	0
0	0	0	0	1	0	0	0	0	0
0	1	0	1	0	0	0	1	0	1
0	0	0	0	1	0	0	0	0	0
0	1	0	1	0	1	0	0	0	1
0	0	0	0	0	0	1	0	0	0
0	1	0	1	0	0	0	1	1	1
0	0	0	1	1	0	1	1	0	0
0	0	0	0	1	1	1	0	0	0
0	1	0	0	1	0	1	0	0	0
0	0	1	0	0	0	0	1	1	1
0	0	0	0	0	0	0	0	1	0
1	1	0	0	0	0	0	1	1	1
0	0	0	0	0	0	0	0	0	0
0	0	0	1	0	0	1	0	0	0
1	0	0	1	0	0	0	0	0	1
0	1	0	0	0	0	0	0	0	0
0	0	0	0	0	1	0	0	0	1
0	0	0	0	0	0	0	0	0	0
1	0	1	0	0	1	0	1	0	1
0	0	0	1	0	0	0	1	1	1
0	1	0	1	0	0	0	1	1	1
0	0	1	1	0	0	0	0	0	0
0	1	0	1	0	0	1	0	0	0
0	0	0	0	0	0	0	0	1	0
0	0	0	0	0	0	0	1	1	1
1	0	0	0	1	1	0	1	1	0
0	0	0	0	0	0	1	1	0	0
0	0	1	1	0	0	0	0	1	0
1	0	1	0	0	1	0	0	0	0
0	0	0	0	0	0	0	0	0	0
0	1	0	1	0	0	0	0	0	0
0	0	1	0	0	0	0	0	0	0
0	0	0	0	0	1	1	0	0	1
0	1	0	0	0	0	0	0	0	0
0	0	0	0	0	0	0	0	0	0
0	0	0	0	0	0	0	0	0	0
1	1	0	0	0	0	0	1	0	0
0	1	0	0	0	0	0	1	0	0
0	1	0	1	0	0	0	0	1	1
0	0	0	1	1	1	1	0	1	0
0	0	0	0	0	0	0	0	1	1
0	0	0	0	0	0	0	0	1	0
1	0	0	0	0	0	1	0	1	0
0	1	1	0	1	0	0	0	0	0
0	0	0	0	1	0	0	1	0	0
0	0	0	0	1	0	0	0	1	0
0	0	1	1	1	0	1	0	0	1
0	0	0	0	0	1	0	0	0	0
0	1	0	1	1	0	1	0	0	0
0	0	0	0	0	1	1	0	0	0
1	1	0	0	0	0	0	0	0	1
0	0	0	0	1	0	0	0	0	0
0	0	1	1	0	0	0	0	1	0
0	1	1	0	1	0	0	0	1	0
1	0	1	0	0	0	0	0	1	0
0	0	0	0	0	1	0	1	0	1
1	0	0	0	1	0	1	0	0	0
0	0	1	0	0	0	0	0	1	0
0	1	0	0	0	0	0	0	0	0
0	0	0	0	0	0	0	0	1	0
0	0	0	0	0	0	0	0	0	0
0	0	0	0	0	0	0	1	0	0
0	0	0	0	0	0	0	0	0	0
0	1	1	1	0	0	1	1	0	1
0	1	0	0	0	0	0	0	0	1
0	1	0	0	0	0	0	1	0	0
0	0	1	0	0	0	0	0	0	0
0	1	0	1	0	1	0	0	1	1
0	0	0	1	1	1	0	1	0	0
0	0	0	0	0	0	0	0	1	0
0	0	0	0	0	0	1	0	1	1
0	0	1	0	1	0	1	1	1	0
1	0	1	1	0	1	0	0	1	0
0	1	1	1	0	0	0	1	0	0
0	0	0	1	0	0	0	0	0	0
1	0	0	1	1	1	0	0	1	0
0	0	1	0	0	1	0	0	0	0
1	0	1	0	0	0	1	0	0	0
0	0	0	0	0	0	0	0	0	0
0	0	0	0	1	0	1	0	0	0
1	0	1	0	0	0	0	0	1	0
0	0	1	0	0	0	1	0	0	1
0	1	1	0	0	0	0	0	0	0
0	0	0	1	1	0	0	0	0	0
0	0	0	0	0	0	1	0	0	0
0	1	1	0	0	1	1	1	0	0
1	0	0	1	0	1	1	0	0	0
0	0	1	0	0	0	0	0	0	0
0	0	1	0	1	0	1	0	0	0
0	0	0	0	0	0	0	0	0	0
1	0	0	1	0	0	1	0	0	0
1	0	1	1	0	0	0	0	0	1
0	1	0	0	1	0	0	0	0	0
0	0	1	0	0	0	1	0	1	0
0	0	1	1	1	0	0	0	0	1
0	0	0	0	1	1	0	0	1	0
0	0	0	0	0	0	1	0	0	0
0	0	0	1	0	1	1	0	0	0
0	0	0	0	0	0	0	1	0	1
0	1	0	0	0	0	1	0	0	0
1	0	1	0	0	0	1	1	0	0
0	0	0	1	0	0	1	0	1	0
1	0	0	0	0	0	0	1	0	0
1	0	0	1	0	0	1	0	0	1
0	1	0	0	0	0	1	0	1	0
0	0	0	0	0	0	0	0	0	0
0	0	0	0	1	0	0	0	0	0
0	0	0	1	0	1	0	0	0	1
1	0	0	1	0	1	1	1	0	0
0	0	0	0	0	0	0	0	0	0
0	1	0	0	1	0	0	0	1	1
0	0	1	0	1	0	0	0	1	0
0	1	1	1	0	0	1	1	0	0
0	0	1	0	0	0	1	0	1	0
1	0	0	0	1	0	0	1	0	0
0	0	1	0	0	1	1	0	1	0
1	0	0	1	1	0	0	1	0	0
0	0	0	0	0	0	0	0	0	0
0	0	1	0	0	0	0	0	0	0
0	1	1	0	0	0	0	1	1	0
0	1	0	1	0	1	0	0	0	0
0	1	0	0	1	0	0	0	0	0
1	0	1	1	0	0	1	0	0	0
1	0	1	0	0	0	0	1	1	1
0	0	1	0	0	0	0	0	0	0
0	0	0	0	1	1	0	0	0	0
0	0	0	0	0	0	0	0	0	0
0	1	0	0	1	0	0	0	1	0
0	0	0	0	0	0	0	1	0	0
1	0	1	0	0	0	0	1	0	0
1	1	0	1	0	0	0	0	0	0
0	1	0	0	0	1	1	0	0	1
1	0	0	0	1	1	1	1	1	1
0	0	0	1	0	0	0	0	1	0
1	0	0	1	0	1	0	0	0	0
1	1	0	1	0	1	0	0	0	0
0	0	0	1	1	1	0	0	0	0
0	1	1	1	0	0	0	0	0	0
0	0	0	0	0	0	1	0	1	0
0	1	1	0	0	0	0	1	0	0
0	0	0	0	0	0	0	0	1	0
0	0	1	1	0	1	1	0	0	1
0	0	0	1	0	1	0	0	0	0
0	0	1	0	0	1	0	1	1	0
0	0	0	0	0	0	1	1	0	1
1	0	1	1	0	0	0	0	0	1
0	0	0	0	1	0	1	1	1	0
1	0	0	0	0	0	1	0	0	0
0	1	0	0	1	1	1	0	0	1
0	0	0	0	1	1	1	0	0	0
1	0	1	1	1	0	1	0	1	0
0	0	0	0	0	0	0	0	0	0
0	0	1	1	0	1	0	0	0	0
0	1	0	0	0	0	0	0	0	0
0	0	0	0	1	0	1	1	1	0
0	0	0	0	0	1	0	0	1	0
0	0	0	0	1	0	1	0	1	0
0	0	0	1	1	0	1	1	0	0
1	0	0	0	0	0	0	0	0	0
1	0	0	0	0	0	1	0	0	0
0	1	1	0	0	0	1	1	0	1
0	0	0	0	0	1	1	1	0	0
1	0	1	0	1	0	1	0	0	0
1	0	0	1	0	0	0	0	0	0
1	0	0	0	0	1	0	1	1	0
0	0	0	1	0	0	0	0	1	1
0	0	0	0	1	1	0	0	0	0
1	0	0	0	0	0	1	0	0	0
0	1	0	1	0	0	1	1	0	1
0	1	0	0	0	0	0	0	0	0
0	0	1	0	0	0	0	0	0	1
0	0	0	0	0	1	0	0	0	0
0	0	1	0	0	1	0	0	0	0
1	0	1	0	0	0	0	1	1	0
0	1	1	1	1	1	0	0	0	1
0	0	0	0	0	0	0	0	1	0
0	0	1	0	0	0	1	0	0	0
0	0	0	1	0	0	0	0	0	0
1	1	1	1	0	0	1	0	1	1
0	0	0	0	0	0	0	1	1	1
0	0	0	0	0	1	0	0	0	0
0	1	1	0	0	1	1	0	0	0
0	1	0	0	0	0	1	0	0	0
0	1	0	0	0	0	0	0	0	0
0	1	0	0	0	0	1	0	0	1
0	0	0	0	1	0	0	0	0	1
0	1	0	0	0	1	0	1	1	0
0	1	0	0	0	0	0	0	0	1
0	1	1	0	0	1	0	0	0	0
0	1	0	0	0	0	0	1	0	1
0	0	0	0	0	0	0	1	0	0
0	0	0	1	1	0	0	0	0	0
0	0	0	0	1	0	0	0	0	0
0	1	0	0	0	1	1	1	0	0
0	0	0	0	1	0	1	0	0	0
1	0	0	1	0	0	0	1	1	1
0	0	0	1	0	0	0	1	1	0
0	0	0	0	0	0	0	0	0	1
0	1	1	0	0	0	1	0	0	1
0	0	0	0	0	0	1	0	0	0
0	1	1	0	0	0	1	0	0	1
0	0	0	0	1	0	1	0	1	0
0	0	0	0	0	1	1	0	0	1
0	0	0	0	0	0	0	0	0	0
0	0	0	0	0	0	1	0	0	1
0	0	0	1	0	0	0	0	0	0
0	0	1	0	0	1	0	0	0	0
0	0	0	0	1	0	0	0	0	1
0	0	1	0	0	0	1	0	1	0
1	1	0	0	0	0	0	0	0	0
0	0	0	1	0	0	1	1	0	0
0	0	0	0	1	0	0	0	0	0
0	0	0	0	0	1	1	0	0	0
1	1	0	0	0	0	0	0	0	0
1	0	0	0	0	0	0	1	0	0
0	0	0	0	1	0	0	0	0	0
0	0	0	0	1	1	1	0	1	0
0	1	1	0	0	0	0	0	0	0
0	0	1	0	1	0	1	1	0	0
0	0	0	0	0	0	1	0	1	0
0	0	0	0	0	0	0	0	0	0
0	1	1	0	1	0	0	0	1	0
1	0	0	0	1	1	1	1	1	0
0	0	0	0	1	1	0	0	0	0
0	0	0	0	0	1	0	0	0	0
0	1	0	0	0	1	0	1	0	0
0	0	0	0	1	0	0	0	0	0
0	0	0	0	1	0	0	0	0	1
0	0	0	1	1	0	0	1	1	0
0	0	1	1	0	0	0	0	1	0
0	0	0	0	0	0	0	0	1	0
0	0	0	0	0	0	1	1	0	1
0	0	0	0	0	1	0	1	0	0
0	0	1	1	1	0	1	0	0	0
0	0	0	0	0	0	0	0	1	0
0	0	0	0	0	1	0	0	0	0
1	1	0	0	0	1	1	0	1	1
0	0	0	0	0	0	0	1	0	0
0	0	0	1	0	0	0	1	0	0
0	0	0	0	0	0	0	1	0	0
0	0	1	0	0	0	1	0	0	1
0	0	0	0	1	0	1	0	0	0
0	1	0	1	0	1	0	0	0	0
0	0	0	1	0	1	0	0	1	0
1	0	0	1	1	0	0	1	1	0
1	0	0	1	0	0	0	0	0	1
0	0	0	0	0	0	0	0	1	0
0	1	0	0	1	1	0	0	0	0
0	0	0	0	1	1	0	0	0	0
0	0	0	0	0	0	1	0	0	0
0	0	0	0	0	0	0	1	0	0
1	0	0	1	0	1	0	1	1	1
0	0	1	0	0	1	0	0	0	0
1	0	0	0	0	0	1	0	0	1
0	0	0	1	0	0	0	0	0	0
1	0	0	1	0	0	1	0	1	0
0	1	0	1	0	0	0	0	0	1
0	1	0	0	1	1	0	0	0	0
1	1	1	0	0	0	1	0	0	1
0	0	0	0	0	0	0	1	1	0
0	0	0	0	0	0	1	1	0	0
0	1	0	0	0	0	1	0	0	0
0	0	0	0	1	0	0	0	0	0
0	1	0	0	0	0	0	0	0	1
0	1	0	1	0	0	0	1	0	1
0	0	1	0	1	0	0	1	0	0
0	0	1	0	1	0	0	0	1	1
0	0	0	0	1	0	0	0	0	0
0	0	0	1	0	0	0	0	1	1
0	0	0	0	0	1	0	0	1	0
0	0	0	0	0	0	0	0	0	0
0	0	1	0	0	0	1	1	1	0
0	0	1	0	0	0	0	0	0	1
0	0	0	1	0	0	0	0	1	0
1	0	0	0	0	0	1	0	0	0
0	0	0	1	0	0	0	1	0	1
0	0	0	0	0	0	0	0	0	1
0	0	0	0	0	1	1	0	0	1
0	1	1	0	0	0	1	0	1	0
0	0	0	1	1	0	0	0	1	1
0	0	1	0	0	0	0	0	0	0
0	0	1	0	1	0	0	0	1	0
0	0	0	0	0	0	1	0	0	0
0	0	0	0	1	0	0	0	1	0
0	0	0	0	0	0	1	0	0	0
0	0	0	0	0	1	0	0	0	0
0	1	0	1	0	0	0	0	0	1
0	0	0	0	0	1	1	1	1	0
0	0	0	1	0	0	0	0	0	0
0	0	0	0	0	0	0	0	1	0
0	1	1	0	0	0	1	0	0	1
0	1	0	0	0	0	0	1	1	0
1	0	0	1	0	0	1	0	0	1
0	0	0	0	0	0	0	0	1	0
0	0	0	0	0	0	0	0	0	0
0	0	0	0	1	0	0	0	0	0
1	0	0	0	0	0	0	0	0	0
0	0	0	0	0	1	0	0	0	0
0	0	0	0	0	0	0	1	1	0
0	0	1	0	0	0	0	0	0	0
0	1	1	0	1	0	0	1	1	0
0	1	0	0	0	1	0	0	0	0
0	0	1	1	0	0	0	1	0	0
0	0	1	0	1	0	0	0	0	1
0	0	0	0	0	0	1	1	0	1
1	0	0	0	0	0	0	0	0	0
0	0	1	0	1	1	0	0	0	1
1	0	0	0	1	1	0	1	0	0
1	0	0	0	0	0	1	1	0	0
1	0	1	0	0	0	1	0	0	0
0	0	0	0	0	1	1	0	0	0
0	1	0	1	1	0	0	0	0	1
0	0	0	0	1	0	0	0	0	1
0	0	0	0	0	0	0	0	0	1
0	0	1	0	0	0	0	0	0	0
0	0	0	0	0	0	0	0	1	0
1	0	0	0	1	0	0	0	0	0
0	0	1	0	0	1	1	0	0	0
0	1	1	1	0	0	0	0	0	1
0	1	0	0	0	0	0	0	0	0
0	0	1	0	0	0	0	0	0	1
1	1	0	0	0	1	0	0	0	1
0	0	0	0	0	0	1	1	1	0
0	0	0	1	0	1	0	1	1	1
0	0	0	1	0	0	0	1	0	0
0	1	1	0	0	1	0	0	0	0
0	1	0	0	1	1	0	0	0	1
0	1	1	0	0	0	0	0	1	0
0	0	0	0	1	0	0	1	0	0
0	0	0	0	0	0	0	1	0	0
0	1	0	0	0	0	0	1	0	0
1	1	0	1	1	1	0	0	1	1
1	1	0	0	0	0	0	0	1	1
0	1	0	1	0	0	0	1	0	0
1	1	0	0	0	0	1	1	1	1
0	1	0	0	0	1	0	0	0	0
1	0	0	1	1	1	0	1	1	0
1	0	0	0	0	0	1	0	0	0
1	0	0	0	0	1	0	0	1	0
1	0	0	0	0	0	0	0	0	0
0	1	0	0	1	0	0	1	0	0
0	0	1	1	1	0	1	0	1	0
0	1	0	0	0	0	0	0	1	0
0	1	0	0	1	0	0	1	0	0
1	1	1	1	0	1	0	1	0	0
0	0	1	0	1	0	0	0	0	1
0	0	0	1	0	0	0	0	0	1
0	0	1	0	0	0	1	0	0	0
1	1	0	1	0	0	0	0	0	0
0	0	0	0	1	0	0	0	1	1
0	0	1	1	0	0	1	1	0	0
0	1	0	0	0	0	0	0	0	0
0	1	0	0	0	0	0	0	0	0
0	0	0	0	0	1	1	1	0	0
0	0	0	0	0	0	0	0	1	0
0	0	0	1	0	0	0	0	1	1
0	0	1	0	0	0	0	0	0	1
0	0	0	0	1	1	0	0	0	0
0	1	0	0	0	0	0	0	1	0
0	0	1	1	0	0	0	0	0	0
0	0	1	0	0	1	0	0	1	1
0	0	1	0	1	0	0	0	0	0
0	0	0	1	1	0	0	0	0	1
1	0	0	0	0	1	0	0	0	0
0	0	0	0	0	1	0	1	0	0
0	0	1	0	0	0	1	0	1	0
0	0	0	0	1	0	0	0	1	1
0	1	0	1	0	0	0	0	0	0
1	0	1	1	0	0	0	0	0	0
0	1	0	0	0	0	0	0	0	0
1	1	0	1	0	0	1	0	1	0
0	1	0	0	1	0	0	0	0	1
0	0	1	0	1	0	1	0	0	0
0	1	0	1	0	0	1	1	1	0
1	0	1	0	0	0	0	0	1	0
0	0	1	0	0	0	1	0	0	0
1	0	0	1	1	0	1	1	0	0
1	1	1	1	0	0	0	1	0	0
0	0	1	0	0	0	1	1	0	0
0	0	1	0	0	0	0	0	0	1
0	1	0	0	0	1	0	0	1	0
0	0	1	0	1	0	0	0	0	1
0	0	1	0	0	0	0	0	0	0
0	0	0	0	0	0	0	0	0	0
1	0	0	0	0	0	0	0	0	0
1	0	0	1	0	1	0	1	0	1
0	0	0	0	0	0	0	0	0	0
0	0	0	0	0	1	1	0	0	0
0	0	0	0	1	0	0	0	0	1
1	0	0	0	1	0	0	0	0	0
1	0	0	0	0	1	0	0	1	0
0	0	1	0	1	0	1	0	0	0
1	0	0	0	1	0	0	0	0	0
0	0	0	0	0	0	1	0	0	1
1	1	0	0	0	0	1	0	0	1
0	0	0	1	0	0	0	1	1	1
1	0	0	0	0	1	0	0	0	0
0	0	1	0	1	0	1	0	0	0
0	1	0	0	0	0	0	1	0	0
0	0	0	0	0	1	0	0	0	0
0	1	0	1	0	0	1	1	0	0
1	0	0	0	1	1	0	1	0	0
0	1	1	0	0	0	0	1	1	0
0	0	0	0	0	1	0	0	0	0
1	0	1	0	0	0	0	0	0	0
0	0	1	1	0	1	1	0	0	0
1	0	0	0	0	0	0	0	0	0
0	1	0	0	0	0	0	1	0	0
0	1	0	0	1	0	0	0	1	0
0	0	1	0	1	0	1	1	1	0
0	0	0	1	1	0	1	1	0	0
1	0	0	0	0	0	0	0	0	1
1	1	0	0	0	1	1	0	1	0
0	0	0	0	1	1	1	0	0	1
0	0	0	0	0	0	0	0	1	1
0	1	0	0	0	1	0	0	1	0
0	0	0	0	0	0	0	0	1	0
1	0	1	0	0	0	0	0	0	0
0	0	0	0	1	0	0	1	0	0
0	1	0	0	0	1	0	0	0	0
0	0	1	0	0	0	0	1	0	0
0	0	0	0	1	0	1	0	0	0
1	0	0	1	0	0	0	0	0	0
1	1	0	1	1	0	0	0	1	0
0	0	0	0	0	0	0	0	1	0
1	0	0	0	0	0	0	0	0	0
1	0	0	1	1	1	0	0	0	0
1	1	0	0	1	0	0	0	0	0
0	0	1	0	1	0	0	0	0	0
0	0	0	1	0	0	0	1	0	0
0	1	0	0	0	0	0	0	1	0
1	1	0	0	0	0	0	1	0	0
0	0	0	1	0	0	0	0	0	0
0	0	0	0	0	1	1	1	0	0
0	1	0	0	1	0	0	0	0	0
1	0	0	1	1	1	0	0	1	0
0	0	0	0	0	1	1	0	0	0
0	0	0	0	0	1	0	1	0	0
0	0	0	0	1	1	1	0	0	0
0	1	1	1	1	1	0	0	0	1
1	0	0	0	0	0	1	0	0	0
0	0	0	0	0	0	0	0	0	0
0	0	0	0	0	0	0	0	1	0
1	0	0	1	0	0	0	1	0	1
0	0	0	0	0	1	0	1	0	0
0	0	0	0	0	0	0	0	0	0
0	1	0	0	0	0	0	0	0	1
0	0	1	0	0	0	0	1	1	0
0	1	0	1	0	0	0	0	0	1
0	0	0	0	0	0	0	0	1	1
1	1	0	1	1	0	0	0	0	0
1	0	0	0	0	0	1	0	0	0
0	1	1	0	0	0	1	1	0	0
1	0	0	1	0	0	0	0	1	1
0	0	0	0	0	0	0	0	0	0
1	0	0	1	0	0	0	0	0	0
0	0	0	0	0	0	1	1	0	0
1	1	0	1	0	1	0	0	0	1
0	1	0	0	0	0	1	0	1	0
0	1	0	1	1	0	1	1	0	0
0	0	0	0	0	0	1	0	0	0
0	1	0	1	1	0	0	0	0	0
0	0	0	0	0	0	0	0	0	0
0	1	0	0	0	1	0	0	0	0
1	0	0	0	1	0	0	0	0	0
0	0	0	1	0	0	1	1	0	0
0	0	0	0	0	0	0	0	0	0
0	0	1	0	0	0	0	0	0	0
0	0	0	0	1	0	0	0	0	0
0	0	0	1	0	1	0	0	0	1
0	1	0	1	0	0	0	1	0	0
0	0	0	0	1	0	0	0	0	0
1	0	1	0	0	1	0	0	1	0
0	0	1	0	1	0	0	0	0	0
0	0	0	1	1	0	0	0	0	0
0	0	1	0	0	0	0	0	1	1
1	0	1	0	1	1	0	0	0	1
1	0	0	0	1	0	0	0	0	0
0	1	0	0	1	1	1	0	0	0
0	0	0	0	0	0	1	0	0	0
0	0	0	0	0	0	0	0	0	0
0	0	0	1	0	0	1	1	0	0
1	0	0	0	1	0	0	0	0	0
1	0	0	0	0	1	0	1	0	0
0	0	0	0	0	0	1	1	1	0
1	1	0	0	0	0	1	0	1	0
1	0	0	0	1	1	0	0	0	1
1	0	0	0	0	0	1	0	0	0
1	0	0	0	1	0	1	0	0	1
0	1	0	0	0	0	0	0	0	0
1	0	0	0	0	0	0	0	0	0
1	0	0	0	0	1	0	1	1	0
0	0	0	1	0	0	1	1	0	1
1	0	0	0	0	0	0	1	0	1
0	0	0	0	0	0	0	0	0	0
1	1	1	0	0	1	0	1	0	0
1	0	0	0	1	1	0	1	1	0
0	0	1	1	0	0	0	1	0	1
1	0	0	0	0	0	0	0	0	1
0	0	1	0	0	1	1	0	0	0
0	0	0	0	0	0	0	0	0	1
0	0	1	0	0	1	0	1	0	0
0	0	0	0	0	0	1	0	0	0
0	1	0	0	1	0	0	0	0	0
1	0	0	0	0	1	1	0	0	1
1	1	0	0	0	0	0	0	1	1
0	0	0	1	0	0	0	0	0	1
1	0	0	1	0	0	1	0	0	1
0	0	0	0	0	0	0	1	0	0
0	0	0	1	0	1	0	1	1	0
1	0	0	0	0	0	1	0	0	0

## Sheet: together
steps	25th	50th	75th	25th	50th	75th	25th	50th	75th
400	0	0	0	0	0	0	0	0	0
800	0	0	0	0	0	0.75	0	0	0
1200	0	0	0	0	0	0	0	0	0
1600	0	0	0	0	0	0	0	0	0
2000	0	0	0	0	0	0.75	0	0	0
2400	0	0	0	0	0	1	0	0	0
2800	0	0	0	0	0	0	0	0	0
3200	0	0	0	0	0	0.75	0	0	0
3600	0	0	0	0	0	0.75	0	0	0
4000	0	0	0	0	0	0.75	0	0	0
4400	0	0	0	0	0	0.75	0	0	0
4800	0	0	0	0	0	1	0	0	0
5200	0	0	0	0	0	0	0	0	0
5600	0	0	0	0	0	0.75	0	0	0
6000	0	0	0	0	0	0.75	0	0	0
6400	0	0	0	0	0	0	0	0	0
6800	0	0	0	0	0	1	0	0	0
7200	0	0	0	0	0	1	0	0	0
7600	0	0	0	0	0	0	0	0	0
8000	0	0	0	0	0	0	0	0	0
8400	0	0	0	0	0	1	0	0	0
8800	0	0	0	0	0	1	0	0	0
9200	0	0	0	0	0	0	0	0	0.75
9600	0	0	0	0	0	0.75	0	0	0
10000	0	0	0	0	0	0	0	0	0
10400	0	0	0	0	0	1	0	0	0
10800	0	0	0	0	0	0	0	0	0
11200	0	0	0	0	0	0	0	0	0.75
11600	0	0	0	0	0	0	0	0	1
12000	0	0	0	0	0	0	0	0	0
12400	0	0	0	0	0.5	1	0	0	0
12800	0	0	0	0	0	0.75	0	0	0
13200	0	0	0	0	0	0	0	0	0
13600	0	0	0	0	0	0	0	0	0
14000	0	0	0	0	0	0	0	0	0
14400	0	0	0	0	0	0	0	0	0
14800	0	0	0	0	0	0	0	0	0
15200	0	0	0	0	0	0.75	0	0	0.75
15600	0	0	0	0	0.5	1	0	0	0
16000	0	0	0	0	0	0	0	0	0
16400	0	0	0	0	0	0	0	0	0
16800	0	0	0	0	0	0.75	0	0	1
17200	0	0	0	0	0	0.75	0	0	0
17600	0	0	0	0	0	0	0	0	0
18000	0	0	0	0	0	1	0	0	0
18400	0	0	0	0	0	1	0	0	0
18800	0	0	0	0	0	0	0	0	0
19200	0	0	0	0	0	0	0	0	0
19600	0	0	0	0	0	0	0	0	0
20000	0	0	0	0	0	0	0	0	0
20400	0	0	0	0	0	0	0	0	0
20800	0	0	0	0	0	0	0	0	0
21200	0	0	0	0	0.5	1	0	0	0
21600	0	0	0	0	0	1	0	1	1
22000	0	0	0	0	0.5	1	0	0	0
22400	0	0	0	0	0	0	0	0	0.75
22800	0	0	0	0	0	0.75	0	0	0.75
23200	0	0	0	0	0	0.75	0	0	1
23600	0	0	0	0	0	0	0	0	0
24000	0	0	0	0	0	0	0	0	0
24400	0	0	0	0	0	1	0	0	0
24800	0	0	0	0	0	0	0	0	0
25200	0	0	0	0	0	1	0	0.5	1
25600	0	0	0	0	0	0.75	0	0	1
26000	0	0	0	0	0.5	1	0	0	0
26400	0	0	0	0	0	0	0	0	0.75
26800	0	0	0	0	0	0	0	0	0.75
27200	0	0	0	0	0	1	0	0	0.75
27600	0	0	0	0	0	0.75	0	0	0
28000	0	0	0	0	0	0	0	0	0
28400	0	0	0	0	0	1	0	0.5	1
28800	0	0	0	0	0	1	0	0	0
29200	0	0	0	0	0	0	0	0.5	1
29600	0	0	0	0	0	0.75	0	0	0
30000	0	0	0	0	0	1	0	0.5	1
30400	0	0	0	0	0.5	1	0	0	1
30800	0	0	0	0	0	0.75	0	0	0
31200	0	0	0	0	0.5	1	0	0	1
31600	0	0	0	0	0	1	0	0.5	1
32000	0	0	0	0	1	1	0	0	0
32400	0	0	0	0	0	0.75	0	0	0
32800	0	0	0	0	0.5	1	0	0	0
33200	0	0	0	0	0	0.75	0	0	0
33600	0	0	0	0	0	0	0	0	1
34000	0	0	0	0	0	0	0	0	0.75
34400	0	0	0	0	0	1	0	0	1
34800	0	0	0	0	0	0	0	0	0.75
35200	0	0	0	0	0	1	0	0	0
35600	0	0	0	0	0	0.75	0	0	1
36000	0	0	0	0	0	1	0	0	0.75
36400	0	0	0	0	1	1	0	0	0
36800	0	0	0.75	0	0	0	0	0	0
37200	0	0	0	0	0	0	0	0	0.75
37600	0	0	0	0	0	0	0	0	0
38000	0	0	0	0	0	1	0	0	0
38400	0	0	0	0	0	0	0	0	0
38800	0	0	0	0	0	1	0	0	0
39200	0	0	0	0	0	1	0	0	0
39600	0	0	0	0	0	0	0	0	0
40000	0	0	0	0	0	0	0	0	0.75
40400	0	0	0	0	0.5	1	0	0	0.75
40800	0	0	0	0	0	1	0	0	0.75
41200	0	0	0	0	1	1	0	0	0.75
41600	0	0	0	0	0	0.75	0	0	0
42000	0	0	0	0	0	0	0	0	1
42400	0	0	0	0	0	0.75	0	0	0.75
42800	0	0	0	0	0	0	0	0	0
43200	0	0	0	0	0.5	1	0	0	0
43600	0	0	0	0	0.5	1	0	0	0.75
44000	0	0	0	0	1	1	0	0	0
44400	0	0	0	0	0	0	0	0	0.75
44800	0	0	0	0	0	0.75	0	0	0
45200	0	0	0	0	0	0	0	0	0
45600	0	0	0	0	0	0	0	0	1
46000	0	0	0	0	0	1	0	0	0.75
46400	0	0	0	0	0	0	0	0	1
46800	0	0	0	0	0	0	0	0.5	1
47200	0	0	0	0	0	0.75	0	0	0
47600	0	0	0	0	0	1	0	0	1
48000	0	0	0	0	0	1	0	0	0.75
48400	0	0	0	0	0	1	0	0	0.75
48800	0	0	0	0	0	0	0	0	0
49200	0	0	0	0	0.5	1	0	0	0
49600	0	0	0	0	0	0.75	0	0	0
50000	0	0	0	0	1	1	0	0	0.75
50400	0	0	0	0	0	0.75	0	0	0
50800	0	0	0	0	0.5	1	0	0	0
51200	0	0	0	0	0	0	0	0	0
51600	0	0	0	0	0	0.75	0	0	0
52000	0	0	0	0	0	1	0	0	0.75
52400	0	0	0	0	0	0.75	0	0	0
52800	0	0	0	0	0	1	0	0	0.75
53200	0	0	0	0	0	1	0	0	0
53600	0	0	0	0	0	0.75	0	0	0
54000	0	0	0	0	0	0.75	0	0	0.75
54400	0	0	0	0	0.5	1	0	0	0
54800	0	0	0	0	0	1	0	0	0.75
55200	0	0	0	0	0	0.75	0	0	0
55600	0	0	0	0	0	1	0	0	0
56000	0	0	0	0	0.5	1	0	0	0.75
56400	0	0	0	0	0	0	0	0	1
56800	0	0	0	0	0	0.75	0	0	0.75
57200	0	0	0	0	0	0.75	0	0	0.75
57600	0	0	0	0	0	1	0	0	0.75
58000	0	0	0	0	0.5	1	0	0	0
58400	0	0	0	0	1	1	0	0	0.75
58800	0	0	0	0	0	0.75	0	0	1
59200	0	0	0	0	1	1	0	0	0
59600	0	0	0	0	0	0.75	0	0	0
60000	0	0	0	0	0	1	0	0	0
60400	0	0	0	0	0	1	0	0	0
60800	0	0	0	0	0	0.75	0	0	0
61200	0	0	0	0	0	0	0	0	0
61600	0	0	0	0	0	0.75	0	0	0.75
62000	0	0	0	0	0	0.75	0	0	0
62400	0	0	0	0	0.5	1	0	0	0
62800	0	0	0	0	0	0	0	0	0
63200	0	0	0	0	0	0	0	0	0
63600	0	0	0	0	0	0	0	0	0
64000	0	0	0	0	0	0.75	0	0	0
64400	0	0	0	0	0.5	1	0	0	0
64800	0	0	0	0	1	1	0	0	1
65200	0	0	0	0	0	1	0	0	0
65600	0	0	0	0	0	0	0	0	0
66000	0	0	0	0	0	0	0	0	0
66400	0	0	0	0	0	0	0	0	0.75
66800	0	0	0	0	1	1	0	0	0
67200	0	0	0	0	0.5	1	0	0	0.75
67600	0	0	0	0	0.5	1	0	0	0.75
68000	0	0	0	0	0	0	0	0	1
68400	0	0	0	0	0.5	1	0	0	0
68800	0	0	0	0	0	0	0	0	0.75
69200	0	0	0	0	0	0	0	0	1
69600	0	0	0	0	0	1	0	0	0.75
70000	0	0	0	0	0	0.75	0	0	0
70400	0	0	0	0	0	1	0	0	0.75
70800	0	0	0	0	0.5	1	0	0	0
71200	0	0	0	0	0	0.75	0	0	0.75
71600	0	0	0	0	0	1	0	0	0
72000	0	0	0	0	0	0	0	0	0.75
72400	0	0	0	0	0.5	1	0	0	1
72800	0	0	0	0	0	0.75	0	0	0.75
73200	0	0	0	0	0	0	0	0	0
73600	0	0	0	0	0	0	0	0	0
74000	0	0	0	0	0	0.75	0	0	1
74400	0	0	0	0	0	0	0	0	0
74800	0	0	0	0	0	1	0	0	0
75200	0	0	0	0	0	0.75	0	0	0.75
75600	0	0	0	0	0	0	0	0	0
76000	0	0	0	0	0	1	0	0	0
76400	0	0	0	0	0	1	0	0	0
76800	0	0	0	0.25	1	1	0	0	0.75
77200	0	0	0	0	0	1	0	0	1
77600	0	0	0	0	0	0	0	0	0
78000	0	0	0	0	0.5	1	0	0	0.75
78400	0	0	0	0	0.5	1	0	0	0
78800	0	0	0	0	0	1	0	0	0
79200	0	0	0	0	0	0.75	0	0.5	1
79600	0	0	0	0	0	1	0	0.5	1
80000	0	0	0	0	0	0	0	0	0.75
80400	0	0	0	0	0	0	0	0	0
80800	0	0	0	0	0	0.75	0	0	1
81200	0	0	0	0	1	1	0	0	0
81600	0	0	0	0	1	1	0	1	1
82000	0	0	0	0	0.5	1	0	1	1
82400	0	0	0	0	0	0.75	0	0	0
82800	0	0	0	0	0	0.75	0	0	0.75
83200	0	0	0	0	0.5	1	0	0	0.75
83600	0	0	0	0	0	0.75	0	0	0
84000	0	0	0	0	0	0	0	0.5	1
84400	0	0	0	0	1	1	0	0	0
84800	0	0	0	0	0	0.75	0	0	1
85200	0	0	0	0	0	0.75	0	0	0.75
85600	0	0	0	0	0	1	0	0	0.75
86000	0	0	0	0	0	1	0	0	0
86400	0	0	0	0	0	0	0	0.5	1
86800	0	0	0	0	0.5	1	0	0	0
87200	0	0	0	0	0.5	1	0	0	0
87600	0	0	0	0	0	0	0	0	0
88000	0	0	0	0	0	1	0	0	1
88400	0	0	0	0	0	0	0	0	1
88800	0	0	0	0	0.5	1	0	0	0
89200	0	0	0	0	0	0	0	0	1
89600	0	0	0	0	0.5	1	0	0	0.75
90000	0	0	0.75	0	0	0	0	0	0.75
90400	0	0	0	0	0	0	0	0	0
90800	0	0	0	0	0	1	0	0	0.75
91200	0	0	0	0	0	0.75	0	0	0
91600	0	0	0	0	0	0	0	0	0
92000	0	0	0	0	0	0	0	0	0.75
92400	0	0	0.75	0	0	0.75	0	0	1
92800	0	0	0	0	0	0	0	0	1
93200	0	0	0	0	0	0	0	0	0
93600	0	0	0	0	0.5	1	0	0	0.75
94000	0	0	0.75	0	0.5	1	0	0	0
94400	0	0	0	0	0.5	1	0	0	0.75
94800	0	0	0	0	1	1	0	0.5	1
95200	0	0	0	0	0.5	1	0	0	1
95600	0	0	0	0	0.5	1	0	0.5	1
96000	0	0	0	0	0	0.75	0	0	1
96400	0	0	0	0	0	1	0	0	0.75
96800	0	0	0	0	0	0	0	0	0
97200	0	0	0	0	0	0.75	0	0	0.75
97600	0	0	0	0	0	1	0	0	0
98000	0	0	0	0	0	1	0	0	0
98400	0	0	0	0	0	1	0	1	1
98800	0	0	0	0	0	1	0	0	0
99200	0	0	0	0	0	1	0	0	0
99600	0	0	0.75	0	0.5	1	0	0	1
100000	0	0	0	0	0	0.75	0	0	0.75
100400	0	0	0.75	0	0	1	0	0	0
100800	0	0	0.75	0	0	1	0	0	0.75
101200	0	0	0	0	0	1	0	0	0
101600	0	0	0	0	0.5	1	0	0	0
102000	0	0	0	0	0	1	0	0	1
102400	0	0	0	0	0	1	0	0	0
102800	0	0	0	0	0	1	0	0	0.75
103200	0	0	0	0	0.5	1	0	0	1
103600	0	0	0	0	0	0	0	0	0
104000	0	0	0	0	0	1	0	0	0.75
104400	0	0	0	0	0	0	0	0	0
104800	0	0	0	0	0	1	0	0	1
105200	0	0	0.75	0	0	1	0	0	0.75
105600	0	0	0.75	0	0	1	0	0	0
106000	0	0	0.75	0	0.5	1	0	0	0.75
106400	0	0	0	0	0	0.75	0	0	0
106800	0	0	0	0	0	1	0	1	1
107200	0	0	0	0	0.5	1	0	0	0
107600	0	0	0	0	1	1	0	0	0
108000	0	0	0	0.25	1	1	0	0	1
108400	0	0	0	0	0	0.75	0	0.5	1
108800	0	0	0	0	0	0.75	0	0	0.75
109200	0	0	0	0	0	1	0	0	0
109600	0	0	0	0	0	0	0	0	0
110000	0	0	0	0	0.5	1	0	0	1
110400	0	0	0	0	0	1	0	0	0
110800	0	0	0	0	0	1	0	0	0
111200	0	0	0	0	0	1	0	0	0.75
111600	0	0	0	0	0	0.75	0	0	1
112000	0	0	0.75	0	0	1	0	0	1
112400	0	0	0	0	0	0	0	0	0
112800	0	0	1	0	0.5	1	0	0	0
113200	0	0	0	0	0	0	0	0	0.75
113600	0	0	0	0	0	0	0	0	0
114000	0	0	0	0	0	1	0	0	0
114400	0	0	0	0	1	1	0	0	1
114800	0	0	0.75	0	0	0	0	0	1
115200	0	0	0.75	0	0	1	0	0	0
115600	0	0	1	0	0	0	0	0	0
116000	0	0	1	0	0.5	1	0	0	1
116400	0	0	0.75	0	0	1	0	0	0
116800	0	0	0.75	0	0	0.75	0	0	0.75
117200	0	0	0.75	0	0	0.75	0	0	0.75
117600	0	0	1	0	1	1	0	0	0.75
118000	0	0	0.75	0	0	0	0	0	0.75
118400	0	0	0.75	0	0	0	0	0	0
118800	0	0	1	0	0	0	0	0	0.75
119200	0	0	0.75	0	0	0	0	0	0
119600	0	0	1	0.25	1	1	0	0	0
120000	0	0	0.75	0	0	1	0	0	0.75
120400	0	0	0.75	0	0	0.75	0	0	0
120800	0	0	0.75	0	0	0	0	0	1
121200	0	0	0.75	0	0	0	0	0	1
121600	0	0	1	0	0	1	0	1	1
122000	0	0.5	1	0	0	1	0	0	0
122400	0	0.5	1	0	0	1	0	0	0
122800	0	0	1	0	0	1	0	0	0
123200	0	0	1	0	0.5	1	0	0	0
123600	0	0	0.75	0	0	1	0	0	0
124000	0	0	1	0	0	0	0	0	0
124400	0	0	0.75	0	0	0	0	0	0
124800	0	0	1	0	1	1	0	0	0
125200	0	0	0.75	0	0	0.75	0	0	0
125600	0	0	1	0	0	0	0	0	0
126000	0	0	1	0	0	0.75	0	0	0
126400	0	0	1	0	0	1	0	0	0
126800	0	0	1	0	0	1	0	0	0
127200	0	0	1	0	0.5	1	0	0	0
127600	0	0	1	0	0.5	1	0	0	0
128000	0	0	1	0	0	0.75	0	0	0
128400	0	0	1	0	0	1	0	0	0.75
128800	0	0	1	0	0	0	0	0.5	1
129200	0	0	1	0	0	0.75	0	0	0
129600	0	0.5	1	0	0.5	1	0	0	0.75
130000	0	0	1	0	0	1	0	0	0
130400	0	0	1	0	0	0	0	0	0.75
130800	0	0	1	0	0	0.75	0	0	0
131200	0	0	1	0	0	0.75	0	0	0
131600	0	0	1	0	0	0	0	0	0.75
132000	0	0	1	0	0	0.75	0	0	0
132400	0	0	1	0	0	0	0	0	0
132800	0	0	1	0	0	1	0	0.5	1
133200	0	0	1	0	0	0.75	0	0	0
133600	0	0	1	0	0	0	0	0	0
134000	0	0	1	0	0.5	1	0	0	0
134400	0	0	1	0	0	0.75	0	0	1
134800	0	0	1	0	0	1	0	0	0
135200	0	0	1	0	0	0	0	0	0.75
135600	0	0	1	0	0	0.75	0	0	0
136000	0	0	1	0	0	0.75	0	0	0
136400	0	0.5	1	0	0	0	0	0	0
136800	0	0	1	0	0	0	0	0	0
137200	0	0	1	0	0	0	0	0	1
137600	0	0.5	1	0	0	0	0	0	1
138000	0	0	1	0	0	0	0	0	0.75
138400	0	0	1	0	0	0	0	0	0
138800	0	0.5	1	0	0.5	1	0	0	0
139200	0	0.5	1	0	0	0	0	0	0
139600	0	0	1	0	0	0.75	0	0	0
140000	0	0	1	0	0	0.75	0	0	0.75
140400	0	1	1	0	0.5	1	0	0	0.75
140800	0	0.5	1	0	0	0	0	0	0
141200	0.25	1	1	0	0	0	0	0	0
141600	0	0.5	1	0	0	0.75	0	0	0
142000	0	0	1	0	0	0.75	0	0	0
142400	0	0	1	0	0	0.75	0	0	1
142800	0	0.5	1	0	0	0	0	0	0
143200	0	0.5	1	0	0	0.75	0	0	0
143600	0	1	1	0	0	0	0	0	0.75
144000	0	0.5	1	0	0.5	1	0	0	0
144400	0	0.5	1	0	0.5	1	0	0	0
144800	0	0.5	1	0	0	0	0	0.5	1
145200	0	0.5	1	0	0	0	0	0	0.75
145600	0	0.5	1	0	0	0.75	0	0	0.75
146000	0	0.5	1	0	0	0.75	0	0	0
146400	0	0.5	1	0	0	1	0	0.5	1
146800	0	0.5	1	0	0	0.75	0	0	1
147200	0	0.5	1	0	0	0	0	0	0.75
147600	0	0.5	1	0	1	1	0	0	0.75
148000	0	1	1	0	0	0	0	0	0.75
148400	0	1	1	0	0	0.75	0	0	0.75
148800	0	1	1	0	0	0.75	0	0	0
149200	0	1	1	0	0	0.75	0	0	0
149600	0	0.5	1	0	0	0.75	0	0	0.75
150000	0	0.5	1	0	0	1	0	0	0
150400	0	0.5	1	0	0	0	0	0	0
150800	0	0.5	1	0	0	0	0	0	0.75
151200	0	1	1	0	0	1	0	0	0
151600	0	1	1	0	0	0	0	0	0
152000	0	1	1	0	0	0	0	0	1
152400	0	1	1	0	0	0	0	0	0.75
152800	0	1	1	0	0	1	0	0	0
153200	0	1	1	0	0	0.75	0	0	0.75
153600	0	1	1	0	0	1	0	0	0.75
154000	0	1	1	0	0	0.75	0	0	0.75
154400	0	1	1	0	0	0	0	0	0
154800	0	1	1	0	0	0.75	0	0	0
155200	0	1	1	0	0	0.75	0	0	0
155600	0	1	1	0	0	1	0	0	0
156000	0	1	1	0	0	0.75	0	0	0
156400	0	1	1	0	0	0	0	0	1
156800	0	1	1	0	0	0	0	0	0.75
157200	0	1	1	0	0	0.75	0	0	0
157600	0.25	1	1	0	0	0	0	0	0
158000	0.25	1	1	0	0	0	0	0.5	1
158400	0	1	1	0	0	0.75	0	0	0
158800	0	1	1	0	0	0	0	1	1
159200	0	1	1	0	0	0	0	0	0.75
159600	0.25	1	1	0	0	1	0	0	0.75
160000	0	1	1	0	0	0.75	0	0	0.75
160400	0	1	1	0	0	0	0	0	0.75
160800	0.25	1	1	0	0	1	0	0	0.75
161200	0	1	1	0	0	0	0	0	0.75
161600	0	1	1	0	0	0.75	0	0	0
162000	0	1	1	0	0	0.75	0	0	0
162400	0	1	1	0	0	0	0	0	0
162800	0	1	1	0	0	0	0	0	0
163200	0	1	1	0	0	0.75	0	0	0
163600	0	1	1	0	0	0	0	0	0
164000	0.25	1	1	0	0	0	0	0	1
164400	0.25	1	1	0	0	0.75	0	0	0.75
164800	0	1	1	0	0	0.75	0	0	0
165200	0	1	1	0	0	1	0	0	0
165600	0.25	1	1	0	0	1	0	0	0
166000	0.25	1	1	0	0	0.75	0	0	0.75
166400	0.25	1	1	0	0.5	1	0	0	0
166800	0	1	1	0	0	0	0	0	1
167200	0.25	1	1	0	0	0.75	0	0	0
167600	0	1	1	0	0	1	0	0	0
168000	0.25	1	1	0	0	1	0	0	0
168400	0.25	1	1	0	0	0	0	0	0
168800	0.25	1	1	0	0	0.75	0	0	0
169200	0	1	1	0	0	0.75	0	0	0
169600	0	1	1	0	0	0	0	0	0.75
170000	0.25	1	1	0	0	0.75	0	0	0
170400	0.25	1	1	0	0	1	0	0	0.75
170800	0.25	1	1	0	0	1	0	0	0.75
171200	1	1	1	0	1	1	0	0	0
171600	0.25	1	1	0	0.5	1	0	0	0
172000	0.25	1	1	0	0	1	0	0	1
172400	0.25	1	1	0	0	0.75	0	0	0
172800	0.25	1	1	0	0	0	0	0.5	1
173200	0.25	1	1	0	0	0.75	0	0	0.75
173600	0.25	1	1	0	0	1	0	0	0
174000	0.25	1	1	0	0	0.75	0	0	0.75
174400	0.25	1	1	0	0	0	0	0	0.75
174800	0.25	1	1	0	0	0	0	0	0
175200	0.25	1	1	0	0	1	0	0	0.75
175600	0.25	1	1	0	0	0.75	0	0	0
176000	0.25	1	1	0	0	0	0	0	0
176400	0.25	1	1	0	0	0.75	0	0	0.75
176800	0.25	1	1	0	0	0.75	0	0	0
177200	0.25	1	1	0	0	1	0.25	1	1
177600	0.25	1	1	0	0	0	0	0	0.75
178000	0.25	1	1	0	0	0	0	0	0
178400	0.25	1	1	0	0	1	0	0	0
178800	1	1	1	0	0.5	1	0	0	0
179200	0.25	1	1	0	0.5	1	0	0	0
179600	0.25	1	1	0	0	1	0	0	0
180000	0.25	1	1	0	0	0	0	0	0.75
180400	0.25	1	1	0	0	0.75	0	0	1
180800	0.25	1	1	0	1	1	0	0	0
181200	0.25	1	1	0	0.5	1	0	0	0.75
181600	1	1	1	0	0	0	0	0	0
182000	0.25	1	1	0	0	0	0	0	1
182400	0.25	1	1	0	0	1	0	0	0
182800	0.25	1	1	0	0	1	0	0.5	1
183200	0.25	1	1	0	0	0	0	0	0
183600	0.25	1	1	0	0	0.75	0	0	0
184000	0.25	1	1	0	0	0	0	0	0.75
184400	0.25	1	1	0	0	0.75	0	0	1
184800	0.25	1	1	0	0	0	0	0	1
185200	0.25	1	1	0	0	0.75	0	0	1
185600	0.25	1	1	0	0	0	0	0	0
186000	0.25	1	1	0	0	0	0	0	1
186400	0.25	1	1	0	0	0	0	0	1
186800	0.25	1	1	0	0	0	0	0	0.75
187200	0.25	1	1	0	0	0	0	0	0
187600	0.25	1	1	0	0	0	0	0	0.75
188000	0.25	1	1	0	0	0	0	0	0
188400	0.25	1	1	0	0	0	0	0	0
188800	0.25	1	1	0	0	0.75	0.25	1	1
189200	0.25	1	1	0	0	0	0	0	0.75
189600	0.25	1	1	0	0	0.75	0	0	0
190000	0.25	1	1	0	0	1	0	0	0
190400	0.25	1	1	0	0	0	0	0	0
190800	1	1	1	0	0	0.75	0	0	0.75
191200	1	1	1	0	0	0	0	0	0
191600	0.25	1	1	0	0	0	0	0	0.75
192000	0.25	1	1	0	0	0	0	0	0
192400	0.25	1	1	0	0.5	1	0	0	0.75
192800	0.25	1	1	0	0	0.75	0	0	0
193200	0.25	1	1	0	0	0.75	0	0	0
193600	0.25	1	1	0	0	1	0	0	0
194000	0.25	1	1	0	0	1	0	0	0
194400	0.25	1	1	0	0.5	1	0	0	0
194800	0.25	1	1	0	0	1	0	0	0.75
195200	0.25	1	1	0	0	0	0	0	0
195600	0.25	1	1	0	0	0.75	0	0	0
196000	0.25	1	1	0	0	0	0	0	0
196400	1	1	1	0	0	1	0	0	0
196800	0.25	1	1	0	0	0	0	0	0
197200	0.25	1	1	0	0	1	0	0	1
197600	0.25	1	1	0	0	0	0	0	0
198000	0.25	1	1	0	0.5	1	0	0	0
198400	0.25	1	1	0	0	1	0	0	0
198800	0.25	1	1	0	0	0.75	0	0	1
199200	0.25	1	1	0	0	0.75	0	0	0
199600	0.25	1	1	0	0	1	0	0	0
200000	0.25	1	1	0	0	0	0	0	0
200400	0.25	1	1	0	0.5	1	0	0	0
200800	0.25	1	1	0	0	0	0	0	0
201200	0.25	1	1	0	0	0	0	0	0
201600	0.25	1	1	0	0	0.75	0	0	0
202000	0.25	1	1	0	0	0	0	0	0
202400	0.25	1	1	0	0	0	0	0	0
202800	0.25	1	1	0	0	0	0	0	1
203200	0.25	1	1	0	0.5	1	0	0	0
203600	0.25	1	1	0	0	1	0	0	0.75
204000	0.25	1	1	0	0.5	1	0	0	0
204400	0.25	1	1	0	0	0	0	0	0
204800	0.25	1	1	0	0	0.75	0	0	0
205200	0.25	1	1	0	0	0	0	0	0
205600	0.25	1	1	0	0	0.75	0	0	1
206000	1	1	1	0	0.5	1	0	0.5	1
206400	0.25	1	1	0	0	0	0	0	0
206800	0.25	1	1	0	0	0.75	0	0	0.75
207200	0.25	1	1	0	0	0.75	0	0	0.75
207600	0.25	1	1	0	0	0	0	0	0.75
208000	0.25	1	1	0	0	0	0	0	1
208400	1	1	1	0	0	0	0	0	0
208800	1	1	1	0	0	0.75	0	0	0
209200	0.25	1	1	0	0	0	0	0	0
209600	0.25	1	1	0	0	0	0	0	0.75
210000	0.25	1	1	0	0	0	0	0	0
210400	0.25	1	1	0	0	0.75	0	0.5	1
210800	0.25	1	1	0	0	0	0	0	0.75
211200	0.25	1	1	0	0	1	0.25	1	1
211600	0.25	1	1	0	0.5	1	0	0	0.75
212000	0.25	1	1	0	0	0	0	0	0
212400	0.25	1	1	0	0	0	0	0	1
212800	0.25	1	1	0	0	0.75	0	0	0.75
213200	0.25	1	1	0	0	0.75	0	0	0
213600	0.25	1	1	0	0	0	0	1	1
214000	0.25	1	1	0	0	0	0	0	0
214400	0.25	1	1	0	0.5	1	0	0	0
214800	0.25	1	1	0	0	0	0	0	0
215200	0.25	1	1	0	0	1	0	0.5	1
215600	0.25	1	1	0	0	0	0	0	0
216000	0.25	1	1	0	0	0.75	0	0	1
216400	0.25	1	1	0	0	0	0	0	0
216800	0.25	1	1	0	0	0.75	0	0	0.75
217200	0.25	1	1	0	0	1	0	0	0
217600	0.25	1	1	0	0	0.75	0	0	0
218000	0.25	1	1	0	0	0.75	0	0	0
218400	0.25	1	1	0	0	0.75	0	0	0.75
218800	0.25	1	1	0	0	0	0	0	0
219200	0.25	1	1	0	0	0	0	0	0
219600	0.25	1	1	0	0	0	0	0	0
220000	0.25	1	1	0	0	0	0	0	0
220400	0.25	1	1	0	0	0	0	0	0
220800	0.25	1	1	0	0	0	0	0	0
221200	0.25	1	1	0	1	1	0	0	0
221600	0.25	1	1	0	0	0	0	0	0
222000	0.25	1	1	0	0	0	0	0	0.75
222400	0.25	1	1	0	0	0	0	0	0.75
222800	0.25	1	1	0	0.5	1	0	0	0
223200	0.25	1	1	0	0	1	0	0	0.75
223600	0.25	1	1	0	0	0	0	0	0
224000	0.25	1	1	0	0	0.75	0	0	0
224400	0.25	1	1	0	0.5	1	0	0	0.75
224800	0.25	1	1	0	0.5	1	0	1	1
225200	0.25	1	1	0	0	1	0	0	0
225600	0.25	1	1	0	0	0	0	0	0
226000	0.25	1	1	0	0.5	1	0	0	0.75
226400	0.25	1	1	0	0	0	0	0	0
226800	0.25	1	1	0	0	0.75	0	0	0.75
227200	0.25	1	1	0	0	0	0	0	0.75
227600	0.25	1	1	0	0	0	0	0	0
228000	1	1	1	0	0	0.75	0	0	0
228400	0.25	1	1	0	0	0.75	0	0	0
228800	0.25	1	1	0	0	0	0	0	0
229200	0.25	1	1	0	0	0	0	0	0.75
229600	0.25	1	1	0	0	0	0	0	0
230000	0.25	1	1	0	0.5	1	0	0	0
230400	0.25	1	1	0	0	1	0	0	0
230800	0.25	1	1	0	0	0	0	0	0
231200	0.25	1	1	0	0	0.75	0	0	1
231600	0.25	1	1	0	0	0	0	0	0
232000	0.25	1	1	0	0	0.75	0	0	0
232400	0.25	1	1	0	0	1	0	0	1
232800	0.25	1	1	0	0	0	0	0	0
233200	0.25	1	1	0	0	0.75	0	0	0
233600	0.25	1	1	0	0	1	0	0	0
234000	0.25	1	1	0	0	0.75	0	0	0
234400	0.25	1	1	0	0	0	0	0	0.75
234800	0.25	1	1	0	0	0.75	0	0	0
235200	0.25	1	1	0	0	0	0	0	0
235600	0.25	1	1	0	0	0	0	0	0.75
236000	0.25	1	1	0	0	1	0	0	0
236400	0.25	1	1	0	0	0.75	0	0	0
236800	0.25	1	1	0	0	0	0	0	0
237200	0.25	1	1	0	0	1	0	0	0
237600	1	1	1	0	0	0.75	0	0	0
238000	0.25	1	1	0	0	0	0	0	0
238400	1	1	1	0	0	0	0	0	0
238800	0.25	1	1	0	0	0.75	0	0	0.75
239200	0.25	1	1	0	0.5	1	0	0	0
239600	1	1	1	0	0	0	0	0	1
240000	0.25	1	1	0	0	1	0	0	0
240400	0.25	1	1	0	0	0.75	0	0	1
240800	0.25	1	1	0	0.5	1	0	0	0
241200	0.25	1	1	0	0	0.75	0	0	0
241600	1	1	1	0	0	0.75	0	0	0.75
242000	0.25	1	1	0	0	1	0	0	0.75
242400	0.25	1	1	0	0	1	0	0	0
242800	1	1	1	0	0	0	0	0	0
243200	1	1	1	0	0	0	0	0	0
243600	1	1	1	0	0	1	0	0	0
244000	0.25	1	1	0	0	0.75	0	0	0.75
244400	0.25	1	1	0	0	0	0	0	0
244800	1	1	1	0	0	1	0	0	1
245200	0.25	1	1	0	0.5	1	0	0	0
245600	0.25	1	1	0	0	0	0	0	0.75
246000	0.25	1	1	0	0	0	0	0	0
246400	0.25	1	1	0	0	0	0	0	0
246800	0.25	1	1	0	0	0.75	0	0	0.75
247200	1	1	1	0	0	0	0	0	0
247600	0.25	1	1	0	0	0.75	0	0.5	1
248000	0.25	1	1	0	0	0.75	0	0	0
248400	0.25	1	1	0	0	1	0	0	0.75
248800	0.25	1	1	0.25	1	1	0	0	0
249200	0.25	1	1	0	0	0	0	0	0
249600	0.25	1	1	0	0	0.75	0	0	0
250000	1	1	1	0	0	1	0	0	0.75
250400	0.25	1	1	0	0	0.75	0	0	0
250800	0.25	1	1	0	0	0.75	0	0.5	1
251200	0.25	1	1	0	0	0	0	0	0
251600	0.25	1	1	0	0	0.75	0	0	0
252000	0.25	1	1	0	0	0	0	0	0.75
252400	1	1	1	0	0.5	1	0	0	0
252800	0.25	1	1	0	0	0	0	0	0
253200	0.25	1	1	0	0	1	0	0	0
253600	1	1	1	0	0	0.75	0	0	0.75
254000	0.25	1	1	0	0	1	0	0	0
254400	0.25	1	1	0	0	1	0	0	0
254800	0.25	1	1	0	0	0	0	0	0.75
255200	0.25	1	1	0	0.5	1	0	0	0.75
255600	0.25	1	1	0	0	0.75	0	0	0
256000	0.25	1	1	0	1	1	0	0	0
256400	0.25	1	1	0	0	0	0	0	0.75
256800	0.25	1	1	0	0	0.75	0	0	1
257200	0.25	1	1	0	0	0	0	0	1
257600	1	1	1	0	0	1	0	0	0
258000	0.25	1	1	0	0	0	0	0	0
258400	0.25	1	1	0	0	0.75	0	0	0
258800	0.25	1	1	0	0	1	0	0	0
259200	1	1	1	0	0	0	0	0	0
259600	0.25	1	1	0	0	0	0	0	0
260000	0.25	1	1	0	0.5	1	0	0	0
260400	0.25	1	1	0	0	0.75	0	0.5	1
260800	0.25	1	1	0	0	1	0	0	0
261200	0.25	1	1	0	0	0	0	0	0
261600	0.25	1	1	0	0	1	0	0	0.75
262000	0.25	1	1	0	0	0.75	0	0	1
262400	0.25	1	1	0	0	0	0	0	0
262800	1	1	1	0	0	0	0	0	0
263200	1	1	1	0	0.5	1	0	0	0.75
263600	1	1	1	0	0	0	0	0	0
264000	0.25	1	1	0	0	0	0	0	0
264400	0.25	1	1	0	0	0	0	0	1
264800	1	1	1	0	0	0	0	0.5	1
265200	1	1	1	0	0	1	0	0	0
265600	0.25	1	1	0	1	1	0	0	1
266000	0.25	1	1	0	0	0	0	0	0
266400	0.25	1	1	0	0	0	0	0	0
266800	0.25	1	1	0	0	0	0	0	0.75
267200	0.25	1	1	0.25	1	1	0	0	0
267600	0.25	1	1	0	0	0.75	0	0	0.75
268000	1	1	1	0	0	0	0	0	0.75
268400	1	1	1	0	0	1	0	0	0
268800	0.25	1	1	0	0	0	0	0	1
269200	0.25	1	1	0	0	0	0	0	0.75
269600	0.25	1	1	0	0	0.75	0	0.5	1
270000	0.25	1	1	0	0	0	0	1	1
270400	1	1	1	0	0	1	0	0	0
270800	0.25	1	1	0	0	0	0	0	0
271200	1	1	1	0	0	0.75	0	0	0.75
271600	0.25	1	1	0	0	0.75	0	0	1
272000	1	1	1	0	0	0	0	0	0.75
272400	1	1	1	0	0	0	0	0	0
272800	1	1	1	0	0	0	0	0	0.75
273200	1	1	1	0	0	1	0	0	0
273600	1	1	1	0	0	0	0	0	0
274000	1	1	1	0	0.5	1	0	0	0
274400	1	1	1	0	0	0.75	0	0	0
274800	1	1	1	0	0	0	0	0	0.75
275200	1	1	1	0	0	1	0	0	0
275600	1	1	1	0	0	0	0	0	0
276000	1	1	1	0	0	1	0	0	0
276400	1	1	1	0	0	0.75	0	0	0
276800	1	1	1	0	0	0.75	0	0	1
277200	1	1	1	0	0	0	0	0	0
277600	1	1	1	0	0	0	0	0	0.75
278000	1	1	1	0	0	0	0	0	0.75
278400	1	1	1	0	0	0	0	0	0
278800	1	1	1	0	0	0	0	0	1
279200	1	1	1	0	0	0.75	0	0	0
279600	1	1	1	0	0	0	0	0	0
280000	1	1	1	0	0	0.75	0	0	0
280400	1	1	1	0	0	0	0	0	0
280800	1	1	1	0	0	0	0	0	1
281200	1	1	1	0	0	0	0	0	1
281600	1	1	1	0	0	0	0	0	0
282000	1	1	1	0	0	0	0	0	0
282400	1	1	1	0	0	1	0	0	0.75
282800	1	1	1	0	0	0	0	0	0
283200	1	1	1	0	0	1	0	0	0.75
283600	1	1	1	0	0	0	0	0	0
284000	1	1	1	0	0	0	0	0.5	1
284400	1	1	1	0	0	1	0	0.5	1
284800	1	1	1	0	1	1	0	0	0.75
285200	1	1	1	0	0	0	0	0	0
285600	1	1	1	0	0	0	0	0	0
286000	1	1	1	0	0	0.75	0	0.5	1
286400	1	1	1	0	0	0	0	0	0
286800	1	1	1	0	0	0	0	0	0
287200	1	1	1	0	0	1	0	0	1
287600	1	1	1	0	0	0.75	0	0	0
288000	1	1	1	0	0	0	0	0	1
288400	1	1	1	0	0	0.75	0	0	0
288800	1	1	1	0	0	0	0	0	0
289200	1	1	1	0	0	1	0	0	0.75
289600	1	1	1	0	0	0	0	0	0.75
290000	1	1	1	0	0	0	0	0	0
290400	1	1	1	0	1	1	0	0	0.75
290800	1	1	1	0	0	0	0	0	1
291200	1	1	1	0	0	0	0	0	0.75
291600	1	1	1	0	0	0	0	0	0.75
292000	1	1	1	0	0	0.75	0	0	0
292400	1	1	1	0	0	0	0	0	0.75
292800	1	1	1	0	0	0.75	0	0	0.75
293200	1	1	1	0	0	0.75	0	0	1
293600	1	1	1	0	0.5	1	0	0	0.75
294000	1	1	1	0	0	0.75	0	0	1
294400	1	1	1	0	0	0	0.25	1	1
294800	1	1	1	0	0	0.75	0	0	1
295200	1	1	1	0	0	0	0	0	0
295600	1	1	1	0	0	0	0	0	0
296000	1	1	1	0	0	0	0	0	0.75
296400	1	1	1	0	1	1	0	0	0
296800	1	1	1	0	0	0	0	0	0
297200	1	1	1	0	0	0.75	0	0	1
297600	1	1	1	0	0	0	0	0	0
298000	1	1	1	0	0	1	0	0	0
298400	1	1	1	0	0	0.75	0	0	0
298800	1	1	1	0	0	0.75	0	0	0.75
299200	1	1	1	0	0.5	1	0	0	0.75
299600	1	1	1	0	0	0	0	0	1
300000	1	1	1	0	0	0	0	0	1
300400	1	1	1	0	0	0	0	0	0
300800	1	1	1	0	0	0	0	0	0.75
301200	1	1	1	0	0	0	0	0	0
301600	1	1	1	0	0	1	0	0.5	1
302000	1	1	1	0	0	0.75	0	0	0
302400	1	1	1	0	0	1	0	0	0
302800	1	1	1	0	0	0	0	0	0
303200	1	1	1	0	0	0.75	0	0	0
303600	1	1	1	0	0	0	0	0	0
304000	1	1	1	0	0	0	0	0.5	1
304400	1	1	1	0	0	1	0	0	0.75
304800	1	1	1	0	0	0	0	0	0
305200	1	1	1	0	0	0	0	0	0
305600	1	1	1	0	0	0	0	0	0
306000	1	1	1	0	0	0.75	0	0	0.75
306400	1	1	1	0	0	0	0	0	0
306800	1	1	1	0	0	0.75	0	0	1
307200	1	1	1	0	0	1	0	0	0
307600	1	1	1	0	0	1	0	0	0
308000	1	1	1	0	0	0	0	0	0.75
308400	1	1	1	0	0	0.75	0	0	0
308800	1	1	1	0	0	0	0	0	0
309200	1	1	1	0	0	0	0	0	0
309600	1	1	1	0	0	0	0	0	0.75
310000	1	1	1	0	0	0	0	0	0
310400	1	1	1	0	0	0.75	0	0	0.75
310800	1	1	1	0	0	1	0	0	1
311200	1	1	1	0	0	0	0	0	0.75
311600	1	1	1	0	0	0	0	0	1
312000	1	1	1	0	0	1	0	0	0
312400	1	1	1	0	0	0.75	0	0	0
312800	1	1	1	0	0	1	0	0	0
313200	1	1	1	0	0	0	0	0	0
313600	1	1	1	0	0	0	0	0	0.75
314000	1	1	1	0	0	0	0	0	0
314400	1	1	1	0	0	0	0	0	0
314800	1	1	1	0	0	0	0	0	0
315200	1	1	1	0	0	0	0	0	0
315600	1	1	1	0	0	0	0	0	0
316000	1	1	1	0	0.5	1	0	0	0
316400	1	1	1	0	0	0	0	0	0
316800	1	1	1	0	0	0.75	0	0	0
317200	1	1	1	0	0	0.75	0	0	0.75
317600	1	1	1	0	0	0.75	0	0	0.75
318000	1	1	1	0	0	0	0	0	0
318400	1	1	1	0	0	1	0	0	0
318800	1	1	1	0	0	1	0	0	1
319200	1	1	1	0	0	0.75	0	0	0
319600	1	1	1	0	0	0.75	0	0	0.75
320000	1	1	1	0	0	0	0	0	0
320400	1	1	1	0	0	1	0	0	0
320800	1	1	1	0	0	0	0	0	0
321200	1	1	1	0	0	0	0	0	0
321600	1	1	1	0	0	0	0	0	0
322000	1	1	1	0	0	0	0	0	0
322400	1	1	1	0	0	0	0	0	0
322800	1	1	1	0	0	0.75	0	0.5	1
323200	1	1	1	0	0	1	0	0	0.75
323600	1	1	1	0	0	0	0	0	1
324000	1	1	1	0	0	0	0	0	1
324400	1	1	1	0	0	1	0	0	0
324800	1	1	1	0	0	0.75	0	0	0
325200	1	1	1	0	0.5	1	0	0	0.75
325600	1	1	1	0	0	0	0	0	0
326000	1	1	1	0	0	0.75	0	0	0
326400	1	1	1	0	0	1	0	0	0
326800	1	1	1	0	0	0.75	0	0.5	1
327200	1	1	1	0	0	0	0	0	0
327600	1	1	1	0	0	0	0	0	0
328000	1	1	1	0	0	0	0	0	0
328400	1	1	1	0.25	1	1	0	0	0
328800	1	1	1	0	0	1	0	0	0
329200	1	1	1	0	0	0.75	0	0	0
329600	1	1	1	0	1	1	0	0	0.75
330000	1	1	1	0	0	0	0	0	0
330400	1	1	1	0	1	1	0	0	0
330800	1	1	1	0	0	0	0	0	1
331200	1	1	1	0	0	0.75	0	0	0.75
331600	1	1	1	0	0	0	0	0	0
332000	1	1	1	0	0	0.75	0	0.5	1
332400	1	1	1	0	0.5	1	0	0	1
332800	1	1	1	0	0	0	0	0	0.75
333200	1	1	1	0	0	0.75	0	0	1
333600	1	1	1	0	1	1	0	0	0
334000	1	1	1	0	0	0.75	0	0	0.75
334400	1	1	1	0	0	0	0	0	1
334800	1	1	1	0	0	0	0	0	0.75
335200	1	1	1	0	0	0.75	0	0	0
335600	1	1	1	0	0	0.75	0	0	0
336000	1	1	1	0	0	1	0	0	0
336400	1	1	1	0	0	0	0	0	0
336800	1	1	1	0	0	0	0	0	0.75
337200	1	1	1	0	0	0.75	0	0	0
337600	1	1	1	0	0	0	0	0	1
338000	1	1	1	0	0	0.75	0	1	1
338400	1	1	1	0	0	0	0	0	1
338800	1	1	1	0	0	0	0	0	0.75
339200	1	1	1	0	0	0	0	0	0
339600	1	1	1	0	0	0	0	0	0
340000	1	1	1	0	0	1	0	0	0
340400	1	1	1	0	0	0	0	0	0.75
340800	1	1	1	0	0	0.75	0	0	0
341200	1	1	1	0	0	0	0	0	0
341600	1	1	1	0	0	0	0	0	0.75
342000	1	1	1	0	0	0.75	0	0	0.75
342400	1	1	1	0	0	0.75	0	0	0.75
342800	1	1	1	0	0	0	0	0	0
343200	1	1	1	0	0	0.75	0	0	0
343600	1	1	1	0	0	0	0	0	0
344000	1	1	1	0	0.5	1	0	0	1
344400	1	1	1	0	0	0.75	0	0	0.75
344800	1	1	1	0	0	0.75	0	0	0
345200	1	1	1	0	0.5	1	0	0	0
345600	1	1	1	0	0	0.75	0	0	0
346000	1	1	1	0	0	0	0	0	0
346400	1	1	1	0	0.5	1	0	0	0
346800	1	1	1	0	0.5	1	0	0	0.75
347200	1	1	1	0	0	0.75	0	0	0.75
347600	1	1	1	0	0	0	0	0	0
348000	1	1	1	0	0	0.75	0	0	0
348400	1	1	1	0	0	0.75	0	0	0
348800	1	1	1	0	0	0	0	0	0
349200	1	1	1	0	0	0	0	0	0.75
349600	1	1	1	0	0	0	0	0	0
350000	1	1	1	0	0.5	1	0	0	1
350400	1	1	1	0	0	0	0	0	0
350800	1	1	1	0	0	0	0	0	0
351200	1	1	1	0	0	0	0	0	0
351600	1	1	1	0	0	0	0	0	0
352000	1	1	1	0	0	0.75	0	0	0
352400	1	1	1	0	0	0.75	0	0	0
352800	1	1	1	0	0	0	0	0	0
353200	1	1	1	0	0	0	0	0	0
353600	1	1	1	0	0	1	0	0	0
354000	1	1	1	0	0	1	0	0	0
354400	1	1	1	0	0	0	0	0	0
354800	1	1	1	0	0	0.75	0	0	0
355200	1	1	1	0	0	0	0	0	0
355600	1	1	1	0	0	0	0	0	0
356000	1	1	1	0	0	1	0.25	1	1
356400	1	1	1	0	0	1	0	0	0
356800	1	1	1	0	0	1	0	0	1
357200	1	1	1	0	0	0	0	0.5	1
357600	1	1	1	0	0	0	0	0	0
358000	1	1	1	0	0	1	0	0	0
358400	1	1	1	0	0	0	0	0	0
358800	1	1	1	0	0	0	0	0	0.75
359200	1	1	1	0	0	0.75	0	0	0
359600	1	1	1	0	0.5	1	0	0	0
360000	1	1	1	0	0	1	0	0	0
360400	1	1	1	0	0	0	0	0	0
360800	1	1	1	0	0.5	1	0	0	0
361200	1	1	1	0	0	1	0	0	0
361600	1	1	1	0	0	0	0	0	0.75
362000	1	1	1	0	0	0.75	0	0	0
362400	1	1	1	0	0	0	0	0	0
362800	1	1	1	0	0	0	0	0	0
363200	1	1	1	0	0	0	0	0.5	1
363600	1	1	1	0	0	0	0	0	1
364000	1	1	1	0	0	0	0	0	0
364400	1	1	1	0	0	0	0	0	0
364800	1	1	1	0	0	0	0	0	0
365200	1	1	1	0	0.5	1	0	0	0
365600	1	1	1	0	0	0	0	0	0
366000	1	1	1	0	0	0	0	0	1
366400	1	1	1	0	0	1	0	0	0
366800	1	1	1	0	0	0.75	0	0	0
367200	1	1	1	0	0	0	0	0	0
367600	1	1	1	0	0	0	0	0	0.75
368000	1	1	1	0	0	0	0	0	0
368400	1	1	1	0	0	0.75	0	0	0
368800	1	1	1	0	0	0	0	0	0
369200	1	1	1	0	0	0.75	0	0	1
369600	1	1	1	0	0	0	0	0	0.75
370000	1	1	1	0	0.5	1	0	0	1
370400	1	1	1	0	0	0	0	0	0
370800	1	1	1	0	0	0	0	0	0.75
371200	1	1	1	0	0	0.75	0	0	0.75
371600	1	1	1	0	1	1	0	0	0
372000	1	1	1	0	0	0	0	0	0.75
372400	1	1	1	0	0	0	0	0	0.75
372800	1	1	1	0	0	0	0	0	0
373200	1	1	1	0	0	1	0	0	0.75
373600	1	1	1	0	0	0	0	0	0.75
374000	1	1	1	0	0	0	0	0	0
374400	1	1	1	0	0	0	0	0	0.75
374800	1	1	1	0	0	0.75	0	0	0
375200	1	1	1	0	0	0.75	0	0	0
375600	1	1	1	0	0	0	0	0	0
376000	1	1	1	0	0	1	0	0	1
376400	1	1	1	0	0	0	0	0	1
376800	1	1	1	0	0	1	0	0	0
377200	1	1	1	0	0	1	0	0	0
377600	1	1	1	0	0	0	0	0	0.75
378000	1	1	1	0	0	0	0	0	0.75
378400	1	1	1	0	0	0	0	0	0.75
378800	1	1	1	0	0.5	1	0	0	0
379200	1	1	1	0	0	0.75	0	0	0
379600	1	1	1	0	0.5	1	0	0	0.75
380000	1	1	1	0	0	0	0	0	0.75
380400	1	1	1	0	0	0.75	0	0	0
380800	1	1	1	0	0	0	0	0	0.75
381200	1	1	1	0	0	0	0	0	0.75
381600	1	1	1	0	0	0	0	0	1
382000	1	1	1	0	0	0.75	0	0	0
382400	1	1	1	0	0	0	0	0	0
382800	1	1	1	0	0	0	0	0	0
383200	1	1	1	0	0	0	0	0	0.75
383600	1	1	1	0	0	0.75	0	0	0
384000	1	1	1	0	0	0.75	0	0	0.75
384400	1	1	1	0	0	0	0	0	0
384800	1	1	1	0	0	1	0	0	0.75
385200	1	1	1	0	0	0	0	0	0
385600	1	1	1	0	0	0	0	0	0.75
386000	1	1	1	0	0	0.75	0	0	0
386400	1	1	1	0	0.5	1	0	0	0
386800	1	1	1	0	0	0	0	0	0
387200	1	1	1	0	0	1	0	0	0
387600	1	1	1	0	0	0	0	0	0.75
388000	1	1	1	0	0	0	0	0	0
388400	1	1	1	0	0	0.75	0	0	0
388800	1	1	1	0	0	0	0	0	0
389200	1	1	1	0	0	0.75	0	0	0
389600	1	1	1	0	0	0.75	0	0	0.75
390000	1	1	1	0	0	1	0	0	0
390400	1	1	1	0	0	1	0	0	0
390800	1	1	1	0	0	0	0	0	0
391200	1	1	1	0	0	1	0	0	0
391600	1	1	1	0	0	0	0	0	0
392000	1	1	1	0	0	0	0	0	0.75
392400	1	1	1	0	0	1	0	0	0.75
392800	1	1	1	0	0	1	0	0	0
393200	1	1	1	0	0	0.75	0	0	0
393600	1	1	1	0	0	0	0	0	0
394000	1	1	1	0	0.5	1	0	0	0
394400	1	1	1	0	0.5	1	0	0	0.75
394800	1	1	1	0	0	1	0	0	1
395200	1	1	1	0	0	0	0	0	0
395600	1	1	1	0	0	0.75	0	0	0.75
396000	1	1	1	0	0	0	0	0	0
396400	1	1	1	0	0	0.75	0	0	1
396800	1	1	1	0	0	0	0	0	1
397200	1	1	1	0	0	0	0	0	0
397600	1	1	1	0	0	1	0	0	1
398000	1	1	1	0	0	1	0	0	0
398400	1	1	1	0	0	0	0	0	0
398800	1	1	1	0	0	1	0	0	0
399200	1	1	1	0	0	0	0	0	0
399600	1	1	1	0	0	1	0	0	0.75
400000	1	1	1	0	0	0	0	0	0

## Sheet: final percentiles
0	0	0	0	0	0	0	0	0	0
400	0	0	0	0	0	0	0	0	0
800	0	0	0	0	0	0.375	0	0	0
1200	0	0	0	0	0	0.25	0	0	0
1600	0	0	0	0	0	0.1875	0	0	0
2000	0	0	0	0	0	0.3	0	0	0
2400	0	0	0	0	0	0.416667	0	0	0
2800	0	0	0	0	0	0.357143	0	0	0
3200	0	0	0	0	0	0.40625	0	0	0
3600	0	0	0	0	0	0.444444	0	0	0
4000	0	0	0	0	0	0.475	0	0	0
4400	0	0	0	0	0	0.55	0	0	0
4800	0	0	0	0	0	0.575	0	0	0
5200	0	0	0	0	0	0.575	0	0	0
5600	0	0	0	0	0	0.65	0	0	0
6000	0	0	0	0	0	0.65	0	0	0
6400	0	0	0	0	0	0.55	0	0	0
6800	0	0	0	0	0	0.65	0	0	0
7200	0	0	0	0	0	0.675	0	0	0
7600	0	0	0	0	0	0.6	0	0	0
8000	0	0	0	0	0	0.525	0	0	0
8400	0	0	0	0	0	0.55	0	0	0
8800	0	0	0	0	0	0.55	0	0	0
9200	0	0	0	0	0	0.55	0	0	0.075
9600	0	0	0	0	0	0.55	0	0	0.075
10000	0	0	0	0	0	0.475	0	0	0.075
10400	0	0	0	0	0	0.575	0	0	0.075
10800	0	0	0	0	0	0.475	0	0	0.075
11200	0	0	0	0	0	0.375	0	0	0.15
11600	0	0	0	0	0	0.375	0	0	0.25
12000	0	0	0	0	0	0.375	0	0	0.25
12400	0	0	0	0	0.05	0.375	0	0	0.25
12800	0	0	0	0	0.05	0.35	0	0	0.25
13200	0	0	0	0	0.05	0.35	0	0	0.175
13600	0	0	0	0	0.05	0.275	0	0	0.175
14000	0	0	0	0	0.05	0.275	0	0	0.175
14400	0	0	0	0	0.05	0.175	0	0	0.175
14800	0	0	0	0	0.05	0.175	0	0	0.175
15200	0	0	0	0	0.05	0.25	0	0	0.175
15600	0	0	0	0	0.1	0.35	0	0	0.075
16000	0	0	0	0	0.1	0.35	0	0	0.075
16400	0	0	0	0	0.05	0.25	0	0	0.075
16800	0	0	0	0	0.05	0.25	0	0	0.175
17200	0	0	0	0	0.05	0.325	0	0	0.175
17600	0	0	0	0	0.05	0.325	0	0	0.175
18000	0	0	0	0	0.05	0.425	0	0	0.175
18400	0	0	0	0	0.05	0.525	0	0	0.175
18800	0	0	0	0	0.05	0.525	0	0	0.175
19200	0	0	0	0	0.05	0.45	0	0	0.1
19600	0	0	0	0	0	0.35	0	0	0.1
20000	0	0	0	0	0	0.35	0	0	0.1
20400	0	0	0	0	0	0.35	0	0	0.1
20800	0	0	0	0	0	0.275	0	0	0
21200	0	0	0	0	0.05	0.3	0	0	0
21600	0	0	0	0	0.05	0.4	0	0.1	0.1
22000	0	0	0	0	0.1	0.4	0	0.1	0.1
22400	0	0	0	0	0.1	0.3	0	0.1	0.175
22800	0	0	0	0	0.1	0.375	0	0.1	0.25
23200	0	0	0	0	0.1	0.45	0	0.1	0.35
23600	0	0	0	0	0.1	0.45	0	0.1	0.35
24000	0	0	0	0	0.1	0.45	0	0.1	0.35
24400	0	0	0	0	0.1	0.55	0	0.1	0.35
24800	0	0	0	0	0.1	0.55	0	0.1	0.35
25200	0	0	0	0	0.05	0.55	0	0.15	0.45
25600	0	0	0	0	0.05	0.525	0	0.05	0.45
26000	0	0	0	0	0.05	0.525	0	0.05	0.45
26400	0	0	0	0	0.05	0.525	0	0.05	0.45
26800	0	0	0	0	0.05	0.45	0	0.05	0.45
27200	0	0	0	0	0.05	0.475	0	0.05	0.425
27600	0	0	0	0	0.05	0.55	0	0.05	0.425
28000	0	0	0	0	0.05	0.55	0	0.05	0.425
28400	0	0	0	0	0.05	0.55	0	0.1	0.525
28800	0	0	0	0	0.05	0.65	0	0.1	0.525
29200	0	0	0	0	0.05	0.55	0	0.1	0.525
29600	0	0	0	0	0.05	0.55	0	0.1	0.425
30000	0	0	0	0	0	0.55	0	0.15	0.525
30400	0	0	0	0	0.05	0.65	0	0.15	0.55
30800	0	0	0	0	0.05	0.725	0	0.15	0.475
31200	0	0	0	0	0.1	0.725	0	0.15	0.5
31600	0	0	0	0	0.1	0.75	0	0.2	0.6
32000	0	0	0	0	0.2	0.85	0	0.2	0.6
32400	0	0	0	0	0.2	0.825	0	0.15	0.5
32800	0	0	0	0	0.25	0.825	0	0.15	0.5
33200	0	0	0	0	0.25	0.9	0	0.1	0.4
33600	0	0	0	0	0.25	0.825	0	0.1	0.5
34000	0	0	0	0	0.25	0.725	0	0.05	0.475
34400	0	0	0	0	0.2	0.725	0	0.05	0.475
34800	0	0	0	0	0.2	0.65	0	0.05	0.55
35200	0	0	0	0	0.15	0.65	0	0.05	0.45
35600	0	0	0	0	0.15	0.625	0	0	0.45
36000	0	0	0	0	0.05	0.625	0	0	0.525
36400	0	0	0	0	0.15	0.65	0	0	0.525
36800	0	0	0.075	0	0.1	0.55	0	0	0.525
37200	0	0	0.075	0	0.1	0.475	0	0	0.6
37600	0	0	0.075	0	0.1	0.475	0	0	0.5
38000	0	0	0.075	0	0.1	0.575	0	0	0.425
38400	0	0	0.075	0	0.1	0.475	0	0	0.325
38800	0	0	0.075	0	0.1	0.575	0	0	0.25
39200	0	0	0.075	0	0.1	0.575	0	0	0.25
39600	0	0	0.075	0	0.1	0.5	0	0	0.15
40000	0	0	0.075	0	0.1	0.4	0	0	0.15
40400	0	0	0.075	0	0.05	0.4	0	0	0.225
40800	0	0	0	0	0.05	0.5	0	0	0.3
41200	0	0	0	0	0.15	0.6	0	0	0.3
41600	0	0	0	0	0.15	0.675	0	0	0.3
42000	0	0	0	0	0.15	0.575	0	0	0.4
42400	0	0	0	0	0.15	0.65	0	0	0.475
42800	0	0	0	0	0.15	0.55	0	0	0.475
43200	0	0	0	0	0.2	0.55	0	0	0.475
43600	0	0	0	0	0.25	0.65	0	0	0.55
44000	0	0	0	0	0.35	0.75	0	0	0.475
44400	0	0	0	0	0.3	0.65	0	0	0.475
44800	0	0	0	0	0.3	0.625	0	0	0.4
45200	0	0	0	0	0.2	0.525	0	0	0.325
45600	0	0	0	0	0.2	0.45	0	0	0.425
46000	0	0	0	0	0.2	0.55	0	0	0.4
46400	0	0	0	0	0.2	0.475	0	0	0.425
46800	0	0	0	0	0.2	0.475	0	0.05	0.525
47200	0	0	0	0	0.15	0.45	0	0.05	0.525
47600	0	0	0	0	0.1	0.45	0	0.05	0.55
48000	0	0	0	0	0	0.45	0	0.05	0.625
48400	0	0	0	0	0	0.55	0	0.05	0.625
48800	0	0	0	0	0	0.475	0	0.05	0.625
49200	0	0	0	0	0.05	0.575	0	0.05	0.625
49600	0	0	0	0	0.05	0.65	0	0.05	0.525
50000	0	0	0	0	0.15	0.65	0	0.05	0.525
50400	0	0	0	0	0.15	0.725	0	0.05	0.425
50800	0	0	0	0	0.2	0.825	0	0	0.325
51200	0	0	0	0	0.2	0.75	0	0	0.325
51600	0	0	0	0	0.2	0.725	0	0	0.225
52000	0	0	0	0	0.2	0.725	0	0	0.225
52400	0	0	0	0	0.2	0.7	0	0	0.15
52800	0	0	0	0	0.2	0.8	0	0	0.225
53200	0	0	0	0	0.15	0.8	0	0	0.225
53600	0	0	0	0	0.15	0.8	0	0	0.225
54000	0	0	0	0	0.05	0.775	0	0	0.225
54400	0	0	0	0	0.1	0.8	0	0	0.225
54800	0	0	0	0	0.05	0.8	0	0	0.3
55200	0	0	0	0	0.05	0.875	0	0	0.3
55600	0	0	0	0	0.05	0.9	0	0	0.3
56000	0	0	0	0	0.1	0.9	0	0	0.3
56400	0	0	0	0	0.1	0.825	0	0	0.4
56800	0	0	0	0	0.1	0.8	0	0	0.4
57200	0	0	0	0	0.1	0.775	0	0	0.475
57600	0	0	0	0	0.1	0.8	0	0	0.55
58000	0	0	0	0	0.15	0.825	0	0	0.475
58400	0	0	0	0	0.2	0.825	0	0	0.55
58800	0	0	0	0	0.2	0.8	0	0	0.575
59200	0	0	0	0	0.3	0.825	0	0	0.575
59600	0	0	0	0	0.3	0.8	0	0	0.575
60000	0	0	0	0	0.25	0.8	0	0	0.5
60400	0	0	0	0	0.25	0.9	0	0	0.4
60800	0	0	0	0	0.25	0.9	0	0	0.325
61200	0	0	0	0	0.25	0.825	0	0	0.25
61600	0	0	0	0	0.25	0.8	0	0	0.25
62000	0	0	0	0	0.2	0.775	0	0	0.25
62400	0	0	0	0	0.15	0.775	0	0	0.175
62800	0	0	0	0	0.15	0.7	0	0	0.075
63200	0	0	0	0	0.05	0.6	0	0	0.075
63600	0	0	0	0	0.05	0.525	0	0	0.075
64000	0	0	0	0	0.05	0.5	0	0	0.075
64400	0	0	0	0	0.1	0.5	0	0	0.075
64800	0	0	0	0	0.2	0.525	0	0	0.175
65200	0	0	0	0	0.2	0.625	0	0	0.175
65600	0	0	0	0	0.2	0.55	0	0	0.1
66000	0	0	0	0	0.2	0.475	0	0	0.1
66400	0	0	0	0	0.15	0.375	0	0	0.175
66800	0	0	0	0	0.25	0.475	0	0	0.175
67200	0	0	0	0	0.3	0.575	0	0	0.25
67600	0	0	0	0	0.35	0.675	0	0	0.325
68000	0	0	0	0	0.35	0.6	0	0	0.425
68400	0	0	0	0	0.35	0.6	0	0	0.425
68800	0	0	0	0	0.25	0.5	0	0	0.4
69200	0	0	0	0	0.25	0.4	0	0	0.5
69600	0	0	0	0	0.25	0.5	0	0	0.575
70000	0	0	0	0	0.25	0.575	0	0	0.575
70400	0	0	0	0	0.25	0.675	0	0	0.575
70800	0	0	0	0	0.2	0.675	0	0	0.575
71200	0	0	0	0	0.15	0.65	0	0	0.575
71600	0	0	0	0	0.1	0.65	0	0	0.5
72000	0	0	0	0	0.1	0.65	0	0	0.475
72400	0	0	0	0	0.1	0.65	0	0	0.575
72800	0	0	0	0	0.1	0.725	0	0	0.575
73200	0	0	0	0	0.1	0.725	0	0	0.475
73600	0	0	0	0	0.1	0.625	0	0	0.4
74000	0	0	0	0	0.1	0.625	0	0	0.5
74400	0	0	0	0	0.1	0.525	0	0	0.425
74800	0	0	0	0	0.05	0.525	0	0	0.425
75200	0	0	0	0	0.05	0.525	0	0	0.425
75600	0	0	0	0	0.05	0.425	0	0	0.425
76000	0	0	0	0	0.05	0.525	0	0	0.35
76400	0	0	0	0	0	0.525	0	0	0.25
76800	0	0	0	0.025	0.1	0.55	0	0	0.25
77200	0	0	0	0.025	0.1	0.65	0	0	0.35
77600	0	0	0	0.025	0.1	0.65	0	0	0.35
78000	0	0	0	0.025	0.15	0.675	0	0	0.325
78400	0	0	0	0.025	0.2	0.775	0	0	0.325
78800	0	0	0	0.025	0.2	0.775	0	0	0.325
79200	0	0	0	0.025	0.2	0.775	0	0.05	0.35
79600	0	0	0	0.025	0.2	0.875	0	0.1	0.45
80000	0	0	0	0.025	0.2	0.775	0	0.1	0.525
80400	0	0	0	0.025	0.2	0.675	0	0.1	0.525
80800	0	0	0	0	0.1	0.65	0	0.1	0.55
81200	0	0	0	0	0.2	0.65	0	0.1	0.45
81600	0	0	0	0	0.3	0.75	0	0.2	0.55
82000	0	0	0	0	0.3	0.75	0	0.3	0.575
82400	0	0	0	0	0.25	0.725	0	0.3	0.575
82800	0	0	0	0	0.25	0.7	0	0.3	0.65
83200	0	0	0	0	0.3	0.725	0	0.25	0.625
83600	0	0	0	0	0.3	0.7	0	0.2	0.525
84000	0	0	0	0	0.3	0.7	0	0.25	0.55
84400	0	0	0	0	0.4	0.8	0	0.25	0.55
84800	0	0	0	0	0.4	0.8	0	0.25	0.55
85200	0	0	0	0	0.3	0.775	0	0.25	0.625
85600	0	0	0	0	0.2	0.775	0	0.15	0.6
86000	0	0	0	0	0.15	0.775	0	0.05	0.5
86400	0	0	0	0	0.15	0.7	0	0.1	0.6
86800	0	0	0	0	0.2	0.725	0	0.1	0.525
87200	0	0	0	0	0.2	0.725	0	0.1	0.45
87600	0	0	0	0	0.2	0.65	0	0.1	0.45
88000	0	0	0	0	0.2	0.75	0	0.05	0.45
88400	0	0	0	0	0.1	0.65	0	0.05	0.55
88800	0	0	0	0	0.15	0.675	0	0.05	0.45
89200	0	0	0	0	0.15	0.6	0	0.05	0.475
89600	0	0	0	0	0.2	0.6	0	0.05	0.475
90000	0	0	0.075	0	0.2	0.5	0	0.05	0.55
90400	0	0	0.075	0	0.2	0.5	0	0	0.45
90800	0	0	0.075	0	0.15	0.5	0	0	0.525
91200	0	0	0.075	0	0.1	0.475	0	0	0.525
91600	0	0	0.075	0	0.1	0.475	0	0	0.525
92000	0	0	0.075	0	0.1	0.375	0	0	0.5
92400	0	0	0.15	0	0.1	0.45	0	0	0.5
92800	0	0	0.15	0	0.05	0.35	0	0	0.6
93200	0	0	0.15	0	0.05	0.35	0	0	0.5
93600	0	0	0.15	0	0.05	0.35	0	0	0.5
94000	0	0	0.15	0	0.1	0.45	0	0	0.425
94400	0	0	0.15	0	0.15	0.55	0	0	0.5
94800	0	0	0.15	0	0.25	0.55	0	0.05	0.525
95200	0	0	0.15	0	0.3	0.575	0	0.05	0.625
95600	0	0	0.15	0	0.35	0.675	0	0.1	0.725
96000	0	0	0.15	0	0.35	0.75	0	0.1	0.75
96400	0	0	0.075	0	0.35	0.775	0	0.1	0.725
96800	0	0	0.075	0	0.35	0.775	0	0.1	0.625
97200	0	0	0.075	0	0.35	0.85	0	0.1	0.7
97600	0	0	0.075	0	0.3	0.85	0	0.1	0.625
98000	0	0	0	0	0.25	0.85	0	0.1	0.625
98400	0	0	0	0	0.2	0.85	0	0.2	0.65
98800	0	0	0	0	0.1	0.85	0	0.15	0.55
99200	0	0	0	0	0.05	0.85	0	0.15	0.45
99600	0	0	0.075	0	0.05	0.85	0	0.1	0.45
100000	0	0	0.075	0	0.05	0.85	0	0.1	0.425
100400	0	0	0.15	0	0.05	0.85	0	0.1	0.35
100800	0	0	0.225	0	0.05	0.95	0	0.1	0.425
101200	0	0	0.225	0	0.05	0.975	0	0.1	0.35
101600	0	0	0.225	0	0.1	0.975	0	0.1	0.35
102000	0	0	0.225	0	0.1	0.975	0	0.1	0.45
102400	0	0	0.225	0	0.1	0.975	0	0	0.35
102800	0	0	0.225	0	0.1	0.975	0	0	0.425
103200	0	0	0.225	0	0.15	0.975	0	0	0.525
103600	0	0	0.15	0	0.1	0.875	0	0	0.425
104000	0	0	0.15	0	0.1	0.9	0	0	0.425
104400	0	0	0.075	0	0.1	0.8	0	0	0.425
104800	0	0	0	0	0.1	0.8	0	0	0.45
105200	0	0	0.075	0	0.1	0.8	0	0	0.525
105600	0	0	0.15	0	0.05	0.8	0	0	0.525
106000	0	0	0.225	0	0.1	0.8	0	0	0.5
106400	0	0	0.225	0	0.1	0.775	0	0	0.5
106800	0	0	0.225	0	0.1	0.775	0	0.1	0.525
107200	0	0	0.225	0	0.1	0.775	0	0.1	0.425
107600	0	0	0.225	0	0.2	0.875	0	0.1	0.425
108000	0	0	0.225	0.025	0.3	0.875	0	0.1	0.45
108400	0	0	0.225	0.025	0.3	0.95	0	0.15	0.55
108800	0	0	0.225	0.025	0.3	0.925	0	0.15	0.525
109200	0	0	0.15	0.025	0.3	0.925	0	0.15	0.45
109600	0	0	0.075	0.025	0.3	0.825	0	0.15	0.45
110000	0	0	0	0.025	0.3	0.825	0	0.15	0.475
110400	0	0	0	0.025	0.3	0.85	0	0.15	0.475
110800	0	0	0	0.025	0.3	0.85	0	0.05	0.375
111200	0	0	0	0.025	0.25	0.85	0	0.05	0.45
111600	0	0	0	0.025	0.15	0.825	0	0.05	0.55
112000	0	0	0.075	0	0.05	0.825	0	0.05	0.55
112400	0	0	0.075	0	0.05	0.75	0	0	0.45
112800	0	0	0.175	0	0.1	0.775	0	0	0.375
113200	0	0	0.175	0	0.1	0.675	0	0	0.45
113600	0	0	0.175	0	0.1	0.675	0	0	0.45
114000	0	0	0.175	0	0.05	0.675	0	0	0.35
114400	0	0	0.175	0	0.15	0.675	0	0	0.45
114800	0	0	0.25	0	0.15	0.575	0	0	0.55
115200	0	0	0.325	0	0.15	0.575	0	0	0.475
115600	0	0	0.425	0	0.15	0.5	0	0	0.375
116000	0	0	0.45	0	0.2	0.5	0	0	0.375
116400	0	0	0.525	0	0.2	0.6	0	0	0.375
116800	0	0	0.5	0	0.15	0.575	0	0	0.45
117200	0	0	0.575	0	0.15	0.65	0	0	0.45
117600	0	0	0.675	0	0.25	0.75	0	0	0.525
118000	0	0	0.75	0	0.25	0.65	0	0	0.6
118400	0	0	0.825	0	0.15	0.55	0	0	0.5
118800	0	0	0.85	0	0.15	0.55	0	0	0.475
119200	0	0	0.85	0	0.15	0.45	0	0	0.475
119600	0	0	0.85	0.025	0.25	0.55	0	0	0.475
120000	0	0	0.825	0.025	0.2	0.55	0	0	0.45
120400	0	0	0.825	0.025	0.2	0.525	0	0	0.45
120800	0	0	0.825	0.025	0.2	0.45	0	0	0.475
121200	0	0	0.825	0.025	0.2	0.375	0	0	0.5
121600	0	0	0.825	0.025	0.1	0.375	0	0.1	0.525
122000	0	0.05	0.85	0.025	0.1	0.475	0	0.1	0.45
122400	0	0.1	0.875	0.025	0.1	0.575	0	0.1	0.45
122800	0	0.1	0.875	0.025	0.1	0.675	0	0.1	0.375
123200	0	0.1	0.9	0.025	0.15	0.775	0	0.1	0.375
123600	0	0.1	0.875	0	0.05	0.775	0	0.1	0.375
124000	0	0.1	0.9	0	0.05	0.675	0	0.1	0.3
124400	0	0.1	0.9	0	0.05	0.6	0	0.1	0.3
124800	0	0.1	0.925	0	0.15	0.7	0	0.1	0.2
125200	0	0.1	0.925	0	0.15	0.775	0	0.1	0.1
125600	0	0.1	0.925	0	0.15	0.675	0	0	0
126000	0	0.05	0.925	0	0.15	0.65	0	0	0
126400	0	0	0.925	0	0.15	0.65	0	0	0
126800	0	0	0.925	0	0.15	0.65	0	0	0
127200	0	0	0.925	0	0.15	0.65	0	0	0
127600	0	0	0.95	0	0.2	0.65	0	0	0
128000	0	0	0.95	0	0.2	0.725	0	0	0
128400	0	0	0.975	0	0.2	0.825	0	0	0.075
128800	0	0	0.975	0	0.1	0.725	0	0.05	0.175
129200	0	0	1	0	0.1	0.725	0	0.05	0.175
129600	0	0.05	1	0	0.15	0.825	0	0.05	0.25
130000	0	0.05	1	0	0.15	0.85	0	0.05	0.25
130400	0	0.05	1	0	0.15	0.75	0	0.05	0.325
130800	0	0.05	1	0	0.15	0.725	0	0.05	0.325
131200	0	0.05	1	0	0.1	0.7	0	0.05	0.325
131600	0	0.05	1	0	0.05	0.6	0	0.05	0.4
132000	0	0.05	1	0	0.05	0.6	0	0.05	0.4
132400	0	0.05	1	0	0.05	0.5	0	0.05	0.325
132800	0	0.05	1	0	0.05	0.6	0	0.05	0.325
133200	0	0.05	1	0	0.05	0.6	0	0.05	0.325
133600	0	0	1	0	0	0.5	0	0.05	0.25
134000	0	0	1	0	0.05	0.5	0	0.05	0.25
134400	0	0	1	0	0.05	0.575	0	0.05	0.275
134800	0	0	1	0	0.05	0.6	0	0.05	0.275
135200	0	0	1	0	0.05	0.525	0	0.05	0.35
135600	0	0	1	0	0.05	0.6	0	0.05	0.275
136000	0	0	1	0	0.05	0.6	0	0.05	0.275
136400	0	0.05	1	0	0.05	0.6	0	0.05	0.275
136800	0	0.05	1	0	0.05	0.5	0	0	0.175
137200	0	0.05	1	0	0.05	0.425	0	0	0.275
137600	0	0.1	1	0	0.05	0.425	0	0	0.375
138000	0	0.1	1	0	0	0.325	0	0	0.45
138400	0	0.1	1	0	0	0.25	0	0	0.35
138800	0	0.15	1	0	0.05	0.25	0	0	0.35
139200	0	0.2	1	0	0.05	0.25	0	0	0.275
139600	0	0.2	1	0	0.05	0.25	0	0	0.275
140000	0	0.2	1	0	0.05	0.25	0	0	0.35
140400	0	0.25	1	0	0.1	0.35	0	0	0.425
140800	0	0.3	1	0	0.1	0.35	0	0	0.425
141200	0.025	0.4	1	0	0.1	0.35	0	0	0.325
141600	0.025	0.4	1	0	0.1	0.425	0	0	0.225
142000	0.025	0.4	1	0	0.1	0.5	0	0	0.15
142400	0.025	0.4	1	0	0.1	0.575	0	0	0.25
142800	0.025	0.4	1	0	0.05	0.475	0	0	0.25
143200	0.025	0.4	1	0	0.05	0.55	0	0	0.25
143600	0.025	0.5	1	0	0.05	0.475	0	0	0.325
144000	0.025	0.55	1	0	0.1	0.5	0	0	0.25
144400	0.025	0.5	1	0	0.1	0.5	0	0	0.175
144800	0.025	0.5	1	0	0.1	0.5	0	0.05	0.275
145200	0	0.45	1	0	0.1	0.5	0	0.05	0.35
145600	0	0.45	1	0	0.1	0.5	0	0.05	0.425
146000	0	0.5	1	0	0.1	0.5	0	0.05	0.425
146400	0	0.55	1	0	0.1	0.525	0	0.1	0.425
146800	0	0.55	1	0	0.1	0.6	0	0.1	0.525
147200	0	0.55	1	0	0.1	0.525	0	0.1	0.6
147600	0	0.5	1	0	0.2	0.625	0	0.1	0.6
148000	0	0.55	1	0	0.15	0.525	0	0.1	0.675
148400	0	0.6	1	0	0.1	0.5	0	0.1	0.75
148800	0	0.65	1	0	0.1	0.575	0	0.05	0.65
149200	0	0.7	1	0	0.1	0.65	0	0.05	0.575
149600	0	0.7	1	0	0.1	0.65	0	0.05	0.575
150000	0	0.7	1	0	0.1	0.675	0	0.05	0.575
150400	0	0.7	1	0	0.1	0.575	0	0	0.475
150800	0	0.7	1	0	0.1	0.5	0	0	0.45
151200	0	0.75	1	0	0.1	0.6	0	0	0.375
151600	0	0.8	1	0	0	0.5	0	0	0.3
152000	0	0.8	1	0	0	0.5	0	0	0.325
152400	0	0.8	1	0	0	0.425	0	0	0.325
152800	0	0.8	1	0	0	0.45	0	0	0.325
153200	0	0.8	1	0	0	0.45	0	0	0.4
153600	0	0.85	1	0	0	0.475	0	0	0.4
154000	0	0.9	1	0	0	0.45	0	0	0.475
154400	0	0.95	1	0	0	0.45	0	0	0.475
154800	0	1	1	0	0	0.525	0	0	0.4
155200	0	1	1	0	0	0.5	0	0	0.4
155600	0	1	1	0	0	0.6	0	0	0.4
156000	0	1	1	0	0	0.675	0	0	0.3
156400	0	1	1	0	0	0.675	0	0	0.325
156800	0	1	1	0	0	0.575	0	0	0.4
157200	0	1	1	0	0	0.575	0	0	0.325
157600	0.025	1	1	0	0	0.475	0	0	0.25
158000	0.05	1	1	0	0	0.4	0	0.05	0.275
158400	0.05	1	1	0	0	0.475	0	0.05	0.275
158800	0.05	1	1	0	0	0.4	0	0.15	0.375
159200	0.05	1	1	0	0	0.325	0	0.15	0.45
159600	0.075	1	1	0	0	0.325	0	0.15	0.525
160000	0.075	1	1	0	0	0.325	0	0.15	0.6
160400	0.075	1	1	0	0	0.325	0	0.15	0.575
160800	0.1	1	1	0	0	0.425	0	0.15	0.575
161200	0.1	1	1	0	0	0.35	0	0.15	0.65
161600	0.075	1	1	0	0	0.425	0	0.15	0.65
162000	0.05	1	1	0	0	0.5	0	0.1	0.55
162400	0.05	1	1	0	0	0.425	0	0.1	0.55
162800	0.05	1	1	0	0	0.425	0	0	0.45
163200	0.05	1	1	0	0	0.5	0	0	0.375
163600	0.025	1	1	0	0	0.4	0	0	0.3
164000	0.05	1	1	0	0	0.325	0	0	0.325
164400	0.075	1	1	0	0	0.4	0	0	0.325
164800	0.05	1	1	0	0	0.375	0	0	0.25
165200	0.05	1	1	0	0	0.475	0	0	0.175
165600	0.075	1	1	0	0	0.5	0	0	0.175
166000	0.1	1	1	0	0	0.5	0	0	0.25
166400	0.125	1	1	0	0.05	0.6	0	0	0.25
166800	0.125	1	1	0	0.05	0.6	0	0	0.35
167200	0.15	1	1	0	0.05	0.6	0	0	0.35
167600	0.15	1	1	0	0.05	0.7	0	0	0.35
168000	0.15	1	1	0	0.05	0.8	0	0	0.25
168400	0.15	1	1	0	0.05	0.725	0	0	0.175
168800	0.175	1	1	0	0.05	0.725	0	0	0.175
169200	0.175	1	1	0	0.05	0.7	0	0	0.175
169600	0.15	1	1	0	0.05	0.6	0	0	0.25
170000	0.15	1	1	0	0.05	0.6	0	0	0.175
170400	0.15	1	1	0	0	0.6	0	0	0.25
170800	0.175	1	1	0	0	0.7	0	0	0.225
171200	0.25	1	1	0	0.1	0.725	0	0	0.225
171600	0.275	1	1	0	0.15	0.725	0	0	0.225
172000	0.275	1	1	0	0.15	0.725	0	0	0.325
172400	0.275	1	1	0	0.15	0.8	0	0	0.325
172800	0.275	1	1	0	0.15	0.725	0	0.05	0.425
173200	0.3	1	1	0	0.15	0.725	0	0.05	0.5
173600	0.325	1	1	0	0.15	0.825	0	0.05	0.425
174000	0.325	1	1	0	0.15	0.825	0	0.05	0.5
174400	0.325	1	1	0	0.15	0.725	0	0.05	0.5
174800	0.325	1	1	0	0.15	0.625	0	0.05	0.425
175200	0.25	1	1	0	0.05	0.625	0	0.05	0.5
175600	0.25	1	1	0	0	0.6	0	0.05	0.5
176000	0.25	1	1	0	0	0.5	0	0.05	0.4
176400	0.25	1	1	0	0	0.5	0	0.05	0.475
176800	0.25	1	1	0	0	0.575	0	0	0.375
177200	0.25	1	1	0	0	0.6	0.025	0.1	0.4
177600	0.25	1	1	0	0	0.5	0.025	0.1	0.475
178000	0.25	1	1	0	0	0.425	0.025	0.1	0.4
178400	0.25	1	1	0	0	0.525	0.025	0.1	0.325
178800	0.325	1	1	0	0.05	0.625	0.025	0.1	0.325
179200	0.325	1	1	0	0.1	0.625	0.025	0.1	0.25
179600	0.325	1	1	0	0.1	0.65	0.025	0.1	0.25
180000	0.325	1	1	0	0.1	0.65	0.025	0.1	0.325
180400	0.325	1	1	0	0.1	0.65	0.025	0.1	0.35
180800	0.325	1	1	0	0.2	0.675	0.025	0.1	0.35
181200	0.325	1	1	0	0.25	0.675	0	0	0.325
181600	0.4	1	1	0	0.25	0.675	0	0	0.25
182000	0.4	1	1	0	0.25	0.675	0	0	0.35
182400	0.4	1	1	0	0.25	0.675	0	0	0.35
182800	0.325	1	1	0	0.2	0.675	0	0.05	0.45
183200	0.325	1	1	0	0.15	0.575	0	0.05	0.45
183600	0.325	1	1	0	0.15	0.55	0	0.05	0.45
184000	0.325	1	1	0	0.15	0.55	0	0.05	0.45
184400	0.325	1	1	0	0.15	0.55	0	0.05	0.45
184800	0.325	1	1	0	0.05	0.45	0	0.05	0.55
185200	0.325	1	1	0	0	0.425	0	0.05	0.575
185600	0.25	1	1	0	0	0.425	0	0.05	0.575
186000	0.25	1	1	0	0	0.425	0	0.05	0.575
186400	0.25	1	1	0	0	0.325	0	0.05	0.675
186800	0.25	1	1	0	0	0.225	0	0	0.65
187200	0.25	1	1	0	0	0.225	0	0	0.65
187600	0.25	1	1	0	0	0.15	0	0	0.725
188000	0.25	1	1	0	0	0.15	0	0	0.65
188400	0.25	1	1	0	0	0.075	0	0	0.55
188800	0.25	1	1	0	0	0.15	0.025	0.1	0.55
189200	0.25	1	1	0	0	0.075	0.025	0.1	0.525
189600	0.25	1	1	0	0	0.15	0.025	0.1	0.525
190000	0.25	1	1	0	0	0.25	0.025	0.1	0.425
190400	0.25	1	1	0	0	0.25	0.025	0.1	0.325
190800	0.325	1	1	0	0	0.325	0.025	0.1	0.325
191200	0.4	1	1	0	0	0.325	0.025	0.1	0.325
191600	0.4	1	1	0	0	0.325	0.025	0.1	0.325
192000	0.4	1	1	0	0	0.325	0.025	0.1	0.325
192400	0.4	1	1	0	0.05	0.425	0.025	0.1	0.4
192800	0.4	1	1	0	0.05	0.425	0	0	0.3
193200	0.4	1	1	0	0.05	0.5	0	0	0.225
193600	0.4	1	1	0	0.05	0.525	0	0	0.225
194000	0.4	1	1	0	0.05	0.525	0	0	0.225
194400	0.4	1	1	0	0.1	0.625	0	0	0.225
194800	0.325	1	1	0	0.1	0.65	0	0	0.225
195200	0.25	1	1	0	0.1	0.65	0	0	0.225
195600	0.25	1	1	0	0.1	0.725	0	0	0.15
196000	0.25	1	1	0	0.1	0.725	0	0	0.15
196400	0.325	1	1	0	0.05	0.725	0	0	0.075
196800	0.325	1	1	0	0.05	0.65	0	0	0.075
197200	0.325	1	1	0	0.05	0.675	0	0	0.175
197600	0.325	1	1	0	0.05	0.575	0	0	0.175
198000	0.325	1	1	0	0.1	0.575	0	0	0.175
198400	0.325	1	1	0	0.05	0.575	0	0	0.175
198800	0.325	1	1	0	0.05	0.55	0	0	0.2
199200	0.325	1	1	0	0.05	0.625	0	0	0.2
199600	0.325	1	1	0	0.05	0.65	0	0	0.2
200000	0.325	1	1	0	0.05	0.65	0	0	0.2
200400	0.25	1	1	0	0.1	0.65	0	0	0.2
200800	0.25	1	1	0	0.1	0.65	0	0	0.2
201200	0.25	1	1	0	0.1	0.55	0	0	0.1
201600	0.25	1	1	0	0.1	0.625	0	0	0.1
202000	0.25	1	1	0	0.05	0.525	0	0	0.1
202400	0.25	1	1	0	0.05	0.425	0	0	0.1
202800	0.25	1	1	0	0.05	0.35	0	0	0.1
203200	0.25	1	1	0	0.1	0.375	0	0	0.1
203600	0.25	1	1	0	0.1	0.375	0	0	0.175
204000	0.25	1	1	0	0.15	0.475	0	0	0.175
204400	0.25	1	1	0	0.1	0.375	0	0	0.175
204800	0.25	1	1	0	0.1	0.45	0	0	0.175
205200	0.25	1	1	0	0.1	0.45	0	0	0.175
205600	0.25	1	1	0	0.1	0.45	0	0	0.275
206000	0.325	1	1	0	0.15	0.55	0	0.05	0.375
206400	0.325	1	1	0	0.15	0.55	0	0.05	0.375
206800	0.325	1	1	0	0.15	0.625	0	0.05	0.35
207200	0.325	1	1	0	0.1	0.6	0	0.05	0.425
207600	0.325	1	1	0	0.1	0.5	0	0.05	0.425
208000	0.325	1	1	0	0.05	0.4	0	0.05	0.525
208400	0.4	1	1	0	0.05	0.4	0	0.05	0.525
208800	0.475	1	1	0	0.05	0.4	0	0.05	0.525
209200	0.475	1	1	0	0.05	0.4	0	0.05	0.525
209600	0.475	1	1	0	0.05	0.325	0	0.05	0.5
210000	0.4	1	1	0	0	0.225	0	0	0.4
210400	0.4	1	1	0	0	0.3	0	0.05	0.5
210800	0.4	1	1	0	0	0.225	0	0.05	0.5
211200	0.4	1	1	0	0	0.25	0.025	0.15	0.525
211600	0.4	1	1	0	0.05	0.35	0.025	0.15	0.525
212000	0.4	1	1	0	0.05	0.35	0.025	0.15	0.425
212400	0.325	1	1	0	0.05	0.35	0.025	0.15	0.525
212800	0.25	1	1	0	0.05	0.35	0.025	0.15	0.6
213200	0.25	1	1	0	0.05	0.425	0.025	0.15	0.6
213600	0.25	1	1	0	0.05	0.425	0.025	0.25	0.625
214000	0.25	1	1	0	0.05	0.425	0.025	0.25	0.625
214400	0.25	1	1	0	0.1	0.45	0.025	0.2	0.525
214800	0.25	1	1	0	0.1	0.45	0.025	0.2	0.45
215200	0.25	1	1	0	0.1	0.45	0	0.15	0.45
215600	0.25	1	1	0	0.05	0.35	0	0.15	0.375
216000	0.25	1	1	0	0.05	0.425	0	0.15	0.475
216400	0.25	1	1	0	0.05	0.425	0	0.15	0.375
216800	0.25	1	1	0	0.05	0.425	0	0.15	0.375
217200	0.25	1	1	0	0.05	0.45	0	0.15	0.375
217600	0.25	1	1	0	0.05	0.525	0	0.05	0.275
218000	0.25	1	1	0	0.05	0.6	0	0.05	0.275
218400	0.25	1	1	0	0	0.575	0	0.05	0.35
218800	0.25	1	1	0	0	0.575	0	0.05	0.35
219200	0.25	1	1	0	0	0.475	0	0	0.25
219600	0.25	1	1	0	0	0.475	0	0	0.25
220000	0.25	1	1	0	0	0.4	0	0	0.15
220400	0.25	1	1	0	0	0.4	0	0	0.15
220800	0.25	1	1	0	0	0.325	0	0	0.075
221200	0.25	1	1	0	0.1	0.325	0	0	0.075
221600	0.25	1	1	0	0.1	0.25	0	0	0.075
222000	0.25	1	1	0	0.1	0.175	0	0	0.15
222400	0.25	1	1	0	0.1	0.1	0	0	0.15
222800	0.25	1	1	0	0.15	0.2	0	0	0.15
223200	0.25	1	1	0	0.15	0.3	0	0	0.225
223600	0.25	1	1	0	0.15	0.3	0	0	0.225
224000	0.25	1	1	0	0.15	0.375	0	0	0.225
224400	0.25	1	1	0	0.2	0.475	0	0	0.3
224800	0.25	1	1	0	0.25	0.575	0	0.1	0.4
225200	0.25	1	1	0	0.15	0.575	0	0.1	0.4
225600	0.25	1	1	0	0.15	0.575	0	0.1	0.4
226000	0.25	1	1	0	0.2	0.675	0	0.1	0.4
226400	0.25	1	1	0	0.2	0.675	0	0.1	0.325
226800	0.25	1	1	0	0.15	0.65	0	0.1	0.4
227200	0.25	1	1	0	0.15	0.55	0	0.1	0.4
227600	0.25	1	1	0	0.15	0.55	0	0.1	0.4
228000	0.325	1	1	0	0.15	0.55	0	0.1	0.4
228400	0.325	1	1	0	0.1	0.525	0	0.1	0.325
228800	0.325	1	1	0	0.05	0.425	0	0	0.225
229200	0.325	1	1	0	0.05	0.325	0	0	0.3
229600	0.325	1	1	0	0.05	0.325	0	0	0.3
230000	0.325	1	1	0	0.05	0.325	0	0	0.225
230400	0.325	1	1	0	0.05	0.425	0	0	0.225
230800	0.325	1	1	0	0.05	0.35	0	0	0.15
231200	0.325	1	1	0	0.05	0.425	0	0	0.175
231600	0.325	1	1	0	0.05	0.425	0	0	0.175
232000	0.25	1	1	0	0.05	0.425	0	0	0.175
232400	0.25	1	1	0	0.05	0.45	0	0	0.275
232800	0.25	1	1	0	0.05	0.45	0	0	0.275
233200	0.25	1	1	0	0.05	0.525	0	0	0.2
233600	0.25	1	1	0	0.05	0.625	0	0	0.2
234000	0.25	1	1	0	0	0.6	0	0	0.2
234400	0.25	1	1	0	0	0.5	0	0	0.275
234800	0.25	1	1	0	0	0.575	0	0	0.275
235200	0.25	1	1	0	0	0.5	0	0	0.175
235600	0.25	1	1	0	0	0.5	0	0	0.25
236000	0.25	1	1	0	0	0.525	0	0	0.25
236400	0.25	1	1	0	0	0.5	0	0	0.15
236800	0.25	1	1	0	0	0.5	0	0	0.15
237200	0.25	1	1	0	0	0.525	0	0	0.15
237600	0.325	1	1	0	0	0.5	0	0	0.15
238000	0.325	1	1	0	0	0.425	0	0	0.15
238400	0.4	1	1	0	0	0.425	0	0	0.075
238800	0.4	1	1	0	0	0.425	0	0	0.15
239200	0.4	1	1	0	0.05	0.525	0	0	0.15
239600	0.475	1	1	0	0.05	0.525	0	0	0.175
240000	0.475	1	1	0	0.05	0.525	0	0	0.175
240400	0.475	1	1	0	0.05	0.525	0	0	0.275
240800	0.475	1	1	0	0.1	0.625	0	0	0.275
241200	0.475	1	1	0	0.1	0.6	0	0	0.275
241600	0.475	1	1	0	0.1	0.6	0	0	0.35
242000	0.475	1	1	0	0.1	0.7	0	0	0.425
242400	0.4	1	1	0	0.1	0.8	0	0	0.425
242800	0.475	1	1	0	0.1	0.725	0	0	0.35
243200	0.55	1	1	0	0.05	0.625	0	0	0.35
243600	0.55	1	1	0	0.05	0.725	0	0	0.25
244000	0.55	1	1	0	0.05	0.7	0	0	0.325
244400	0.55	1	1	0	0.05	0.625	0	0	0.225
244800	0.625	1	1	0	0	0.625	0	0	0.325
245200	0.625	1	1	0	0.05	0.65	0	0	0.325
245600	0.55	1	1	0	0.05	0.575	0	0	0.325
246000	0.55	1	1	0	0.05	0.475	0	0	0.25
246400	0.55	1	1	0	0.05	0.375	0	0	0.25
246800	0.475	1	1	0	0.05	0.45	0	0	0.325
247200	0.475	1	1	0	0.05	0.45	0	0	0.325
247600	0.4	1	1	0	0.05	0.425	0	0.05	0.425
248000	0.4	1	1	0	0.05	0.425	0	0.05	0.35
248400	0.4	1	1	0	0.05	0.525	0	0.05	0.425
248800	0.325	1	1	0.025	0.15	0.525	0	0.05	0.325
249200	0.325	1	1	0.025	0.1	0.425	0	0.05	0.325
249600	0.325	1	1	0.025	0.1	0.5	0	0.05	0.25
250000	0.4	1	1	0.025	0.1	0.6	0	0.05	0.325
250400	0.4	1	1	0.025	0.1	0.675	0	0.05	0.325
250800	0.4	1	1	0.025	0.1	0.675	0	0.1	0.35
251200	0.325	1	1	0.025	0.1	0.675	0	0.1	0.35
251600	0.325	1	1	0.025	0.1	0.675	0	0.05	0.25
252000	0.325	1	1	0.025	0.1	0.6	0	0.05	0.325
252400	0.4	1	1	0.025	0.15	0.6	0	0.05	0.25
252800	0.4	1	1	0	0.05	0.5	0	0.05	0.25
253200	0.4	1	1	0	0.05	0.6	0	0.05	0.25
253600	0.475	1	1	0	0.05	0.6	0	0.05	0.325
254000	0.4	1	1	0	0.05	0.6	0	0.05	0.25
254400	0.4	1	1	0	0.05	0.625	0	0.05	0.25
254800	0.4	1	1	0	0.05	0.55	0	0	0.225
255200	0.4	1	1	0	0.1	0.65	0	0	0.3
255600	0.4	1	1	0	0.1	0.65	0	0	0.3
256000	0.4	1	1	0	0.2	0.75	0	0	0.225
256400	0.325	1	1	0	0.15	0.65	0	0	0.3
256800	0.325	1	1	0	0.15	0.725	0	0	0.4
257200	0.325	1	1	0	0.15	0.625	0	0	0.5
257600	0.325	1	1	0	0.15	0.65	0	0	0.425
258000	0.325	1	1	0	0.15	0.55	0	0	0.425
258400	0.325	1	1	0	0.15	0.525	0	0	0.425
258800	0.325	1	1	0	0.15	0.625	0	0	0.35
259200	0.4	1	1	0	0.1	0.525	0	0	0.275
259600	0.4	1	1	0	0.1	0.45	0	0	0.275
260000	0.4	1	1	0	0.05	0.45	0	0	0.275
260400	0.4	1	1	0	0.05	0.525	0	0.05	0.3
260800	0.4	1	1	0	0.05	0.55	0	0.05	0.2
261200	0.4	1	1	0	0.05	0.55	0	0.05	0.1
261600	0.325	1	1	0	0.05	0.55	0	0.05	0.175
262000	0.325	1	1	0	0.05	0.625	0	0.05	0.275
262400	0.325	1	1	0	0.05	0.55	0	0.05	0.275
262800	0.4	1	1	0	0.05	0.45	0	0.05	0.275
263200	0.4	1	1	0	0.1	0.55	0	0.05	0.35
263600	0.475	1	1	0	0.1	0.55	0	0.05	0.35
264000	0.475	1	1	0	0.05	0.45	0	0.05	0.35
264400	0.475	1	1	0	0.05	0.375	0	0	0.35
264800	0.55	1	1	0	0.05	0.275	0	0.05	0.45
265200	0.625	1	1	0	0.05	0.375	0	0.05	0.45
265600	0.625	1	1	0	0.15	0.375	0	0.05	0.475
266000	0.625	1	1	0	0.15	0.3	0	0.05	0.375
266400	0.625	1	1	0	0.15	0.3	0	0.05	0.375
266800	0.55	1	1	0	0.15	0.3	0	0.05	0.45
267200	0.475	1	1	0.025	0.2	0.3	0	0.05	0.375
267600	0.4	1	1	0.025	0.2	0.375	0	0.05	0.45
268000	0.475	1	1	0.025	0.2	0.375	0	0.05	0.525
268400	0.55	1	1	0.025	0.2	0.475	0	0.05	0.425
268800	0.475	1	1	0.025	0.2	0.475	0	0	0.425
269200	0.4	1	1	0.025	0.2	0.375	0	0	0.5
269600	0.4	1	1	0.025	0.1	0.35	0	0.05	0.5
270000	0.4	1	1	0.025	0.1	0.35	0	0.15	0.6
270400	0.475	1	1	0.025	0.1	0.45	0	0.15	0.6
270800	0.475	1	1	0.025	0.1	0.45	0	0.15	0.525
271200	0.55	1	1	0	0	0.425	0	0.15	0.6
271600	0.55	1	1	0	0	0.425	0	0.15	0.625
272000	0.55	1	1	0	0	0.425	0	0.15	0.625
272400	0.55	1	1	0	0	0.325	0	0.15	0.625
272800	0.625	1	1	0	0	0.325	0	0.15	0.6
273200	0.7	1	1	0	0	0.425	0	0.15	0.525
273600	0.775	1	1	0	0	0.35	0	0.1	0.425
274000	0.85	1	1	0	0.05	0.45	0	0	0.325
274400	0.85	1	1	0	0.05	0.425	0	0	0.325
274800	0.925	1	1	0	0.05	0.425	0	0	0.4
275200	0.925	1	1	0	0.05	0.45	0	0	0.325
275600	1	1	1	0	0.05	0.375	0	0	0.225
276000	1	1	1	0	0.05	0.475	0	0	0.15
276400	1	1	1	0	0.05	0.55	0	0	0.15
276800	1	1	1	0	0.05	0.625	0	0	0.175
277200	1	1	1	0	0.05	0.525	0	0	0.175
277600	1	1	1	0	0.05	0.525	0	0	0.25
278000	1	1	1	0	0	0.425	0	0	0.325
278400	1	1	1	0	0	0.35	0	0	0.325
278800	1	1	1	0	0	0.35	0	0	0.35
279200	1	1	1	0	0	0.325	0	0	0.35
279600	1	1	1	0	0	0.325	0	0	0.35
280000	1	1	1	0	0	0.3	0	0	0.35
280400	1	1	1	0	0	0.225	0	0	0.35
280800	1	1	1	0	0	0.15	0	0	0.35
281200	1	1	1	0	0	0.15	0	0	0.45
281600	1	1	1	0	0	0.15	0	0	0.375
282000	1	1	1	0	0	0.15	0	0	0.3
282400	1	1	1	0	0	0.25	0	0	0.375
282800	1	1	1	0	0	0.25	0	0	0.275
283200	1	1	1	0	0	0.275	0	0	0.35
283600	1	1	1	0	0	0.275	0	0	0.35
284000	1	1	1	0	0	0.2	0	0.05	0.45
284400	1	1	1	0	0	0.3	0	0.1	0.55
284800	1	1	1	0	0.1	0.4	0	0.1	0.525
285200	1	1	1	0	0.1	0.4	0	0.1	0.425
285600	1	1	1	0	0.1	0.4	0	0.1	0.425
286000	1	1	1	0	0.1	0.475	0	0.15	0.525
286400	1	1	1	0	0.1	0.375	0	0.15	0.45
286800	1	1	1	0	0.1	0.375	0	0.15	0.45
287200	1	1	1	0	0.1	0.375	0	0.15	0.475
287600	1	1	1	0	0.1	0.45	0	0.15	0.475
288000	1	1	1	0	0.1	0.45	0	0.1	0.475
288400	1	1	1	0	0.1	0.425	0	0.05	0.375
288800	1	1	1	0	0	0.325	0	0.05	0.3
289200	1	1	1	0	0	0.425	0	0.05	0.375
289600	1	1	1	0	0	0.425	0	0.05	0.45
290000	1	1	1	0	0	0.35	0	0	0.35
290400	1	1	1	0	0.1	0.45	0	0	0.425
290800	1	1	1	0	0.1	0.45	0	0	0.525
291200	1	1	1	0	0.1	0.35	0	0	0.5
291600	1	1	1	0	0.1	0.275	0	0	0.575
292000	1	1	1	0	0.1	0.35	0	0	0.475
292400	1	1	1	0	0.1	0.275	0	0	0.55
292800	1	1	1	0	0.1	0.35	0	0	0.625
293200	1	1	1	0	0.1	0.325	0	0	0.65
293600	1	1	1	0	0.15	0.425	0	0	0.65
294000	1	1	1	0	0.15	0.5	0	0	0.75
294400	1	1	1	0	0.05	0.4	0.025	0.1	0.775
294800	1	1	1	0	0.05	0.475	0.025	0.1	0.775
295200	1	1	1	0	0.05	0.475	0.025	0.1	0.7
295600	1	1	1	0	0.05	0.475	0.025	0.1	0.625
296000	1	1	1	0	0.05	0.4	0.025	0.1	0.7
296400	1	1	1	0	0.15	0.5	0.025	0.1	0.625
296800	1	1	1	0	0.15	0.425	0.025	0.1	0.55
297200	1	1	1	0	0.15	0.425	0.025	0.1	0.55
297600	1	1	1	0	0.1	0.325	0.025	0.1	0.475
298000	1	1	1	0	0.1	0.35	0.025	0.1	0.375
298400	1	1	1	0	0.1	0.425	0	0	0.275
298800	1	1	1	0	0.1	0.425	0	0	0.25
299200	1	1	1	0	0.15	0.525	0	0	0.325
299600	1	1	1	0	0.15	0.525	0	0	0.425
300000	1	1	1	0	0.15	0.525	0	0	0.45
300400	1	1	1	0	0.05	0.425	0	0	0.45
300800	1	1	1	0	0.05	0.425	0	0	0.525
301200	1	1	1	0	0.05	0.35	0	0	0.425
301600	1	1	1	0	0.05	0.45	0	0.05	0.525
302000	1	1	1	0	0.05	0.425	0	0.05	0.525
302400	1	1	1	0	0.05	0.45	0	0.05	0.525
302800	1	1	1	0	0.05	0.375	0	0.05	0.45
303200	1	1	1	0	0	0.35	0	0.05	0.375
303600	1	1	1	0	0	0.35	0	0.05	0.275
304000	1	1	1	0	0	0.35	0	0.1	0.275
304400	1	1	1	0	0	0.45	0	0.1	0.35
304800	1	1	1	0	0	0.45	0	0.1	0.275
305200	1	1	1	0	0	0.45	0	0.1	0.275
305600	1	1	1	0	0	0.35	0	0.05	0.175
306000	1	1	1	0	0	0.35	0	0.05	0.25
306400	1	1	1	0	0	0.25	0	0.05	0.25
306800	1	1	1	0	0	0.325	0	0.05	0.35
307200	1	1	1	0	0	0.35	0	0.05	0.35
307600	1	1	1	0	0	0.45	0	0.05	0.35
308000	1	1	1	0	0	0.45	0	0	0.325
308400	1	1	1	0	0	0.425	0	0	0.25
308800	1	1	1	0	0	0.425	0	0	0.25
309200	1	1	1	0	0	0.425	0	0	0.25
309600	1	1	1	0	0	0.425	0	0	0.325
310000	1	1	1	0	0	0.35	0	0	0.25
310400	1	1	1	0	0	0.425	0	0	0.325
310800	1	1	1	0	0	0.45	0	0	0.325
311200	1	1	1	0	0	0.35	0	0	0.4
311600	1	1	1	0	0	0.25	0	0	0.5
312000	1	1	1	0	0	0.35	0	0	0.425
312400	1	1	1	0	0	0.35	0	0	0.425
312800	1	1	1	0	0	0.45	0	0	0.425
313200	1	1	1	0	0	0.45	0	0	0.425
313600	1	1	1	0	0	0.45	0	0	0.425
314000	1	1	1	0	0	0.45	0	0	0.425
314400	1	1	1	0	0	0.375	0	0	0.35
314800	1	1	1	0	0	0.275	0	0	0.25
315200	1	1	1	0	0	0.275	0	0	0.175
315600	1	1	1	0	0	0.275	0	0	0.075
316000	1	1	1	0	0.05	0.275	0	0	0.075
316400	1	1	1	0	0.05	0.2	0	0	0.075
316800	1	1	1	0	0.05	0.175	0	0	0.075
317200	1	1	1	0	0.05	0.25	0	0	0.15
317600	1	1	1	0	0.05	0.325	0	0	0.15
318000	1	1	1	0	0.05	0.325	0	0	0.15
318400	1	1	1	0	0.05	0.425	0	0	0.15
318800	1	1	1	0	0.05	0.525	0	0	0.25
319200	1	1	1	0	0.05	0.6	0	0	0.25
319600	1	1	1	0	0.05	0.675	0	0	0.325
320000	1	1	1	0	0	0.575	0	0	0.325
320400	1	1	1	0	0	0.675	0	0	0.325
320800	1	1	1	0	0	0.6	0	0	0.325
321200	1	1	1	0	0	0.525	0	0	0.25
321600	1	1	1	0	0	0.45	0	0	0.175
322000	1	1	1	0	0	0.45	0	0	0.175
322400	1	1	1	0	0	0.35	0	0	0.175
322800	1	1	1	0	0	0.325	0	0.05	0.175
323200	1	1	1	0	0	0.35	0	0.05	0.25
323600	1	1	1	0	0	0.275	0	0.05	0.275
324000	1	1	1	0	0	0.275	0	0.05	0.375
324400	1	1	1	0	0	0.275	0	0.05	0.375
324800	1	1	1	0	0	0.35	0	0.05	0.375
325200	1	1	1	0	0.05	0.45	0	0.05	0.45
325600	1	1	1	0	0.05	0.45	0	0.05	0.45
326000	1	1	1	0	0.05	0.525	0	0.05	0.45
326400	1	1	1	0	0.05	0.625	0	0.05	0.45
326800	1	1	1	0	0.05	0.625	0	0.05	0.45
327200	1	1	1	0	0.05	0.525	0	0.05	0.375
327600	1	1	1	0	0.05	0.525	0	0.05	0.275
328000	1	1	1	0	0.05	0.525	0	0.05	0.175
328400	1	1	1	0.025	0.15	0.525	0	0.05	0.175
328800	1	1	1	0.025	0.15	0.55	0	0.05	0.175
329200	1	1	1	0.025	0.1	0.525	0	0.05	0.1
329600	1	1	1	0.025	0.2	0.625	0	0.05	0.175
330000	1	1	1	0.025	0.2	0.55	0	0.05	0.175
330400	1	1	1	0.025	0.3	0.55	0	0.05	0.175
330800	1	1	1	0.025	0.3	0.475	0	0	0.175
331200	1	1	1	0.025	0.3	0.55	0	0	0.25
331600	1	1	1	0.025	0.3	0.55	0	0	0.25
332000	1	1	1	0.025	0.3	0.625	0	0.05	0.35
332400	1	1	1	0	0.25	0.625	0	0.05	0.45
332800	1	1	1	0	0.25	0.525	0	0.05	0.525
333200	1	1	1	0	0.25	0.525	0	0.05	0.625
333600	1	1	1	0	0.25	0.525	0	0.05	0.55
334000	1	1	1	0	0.25	0.6	0	0.05	0.625
334400	1	1	1	0	0.15	0.5	0	0.05	0.725
334800	1	1	1	0	0.15	0.5	0	0.05	0.7
335200	1	1	1	0	0.15	0.5	0	0.05	0.625
335600	1	1	1	0	0.15	0.575	0	0.05	0.625
336000	1	1	1	0	0.15	0.6	0	0	0.525
336400	1	1	1	0	0.1	0.5	0	0	0.425
336800	1	1	1	0	0.1	0.5	0	0	0.425
337200	1	1	1	0	0.1	0.5	0	0	0.325
337600	1	1	1	0	0	0.4	0	0	0.425
338000	1	1	1	0	0	0.4	0	0.1	0.45
338400	1	1	1	0	0	0.4	0	0.1	0.45
338800	1	1	1	0	0	0.4	0	0.1	0.45
339200	1	1	1	0	0	0.325	0	0.1	0.45
339600	1	1	1	0	0	0.25	0	0.1	0.45
340000	1	1	1	0	0	0.25	0	0.1	0.45
340400	1	1	1	0	0	0.25	0	0.1	0.525
340800	1	1	1	0	0	0.325	0	0.1	0.45
341200	1	1	1	0	0	0.25	0	0.1	0.45
341600	1	1	1	0	0	0.25	0	0.1	0.425
342000	1	1	1	0	0	0.25	0	0	0.4
342400	1	1	1	0	0	0.325	0	0	0.375
342800	1	1	1	0	0	0.325	0	0	0.3
343200	1	1	1	0	0	0.4	0	0	0.3
343600	1	1	1	0	0	0.4	0	0	0.3
344000	1	1	1	0	0.05	0.4	0	0	0.4
344400	1	1	1	0	0.05	0.475	0	0	0.4
344800	1	1	1	0	0.05	0.475	0	0	0.4
345200	1	1	1	0	0.1	0.575	0	0	0.4
345600	1	1	1	0	0.1	0.65	0	0	0.325
346000	1	1	1	0	0.1	0.575	0	0	0.25
346400	1	1	1	0	0.15	0.6	0	0	0.175
346800	1	1	1	0	0.2	0.7	0	0	0.25
347200	1	1	1	0	0.2	0.7	0	0	0.325
347600	1	1	1	0	0.2	0.7	0	0	0.325
348000	1	1	1	0	0.15	0.675	0	0	0.225
348400	1	1	1	0	0.15	0.675	0	0	0.15
348800	1	1	1	0	0.15	0.6	0	0	0.15
349200	1	1	1	0	0.1	0.5	0	0	0.225
349600	1	1	1	0	0.1	0.425	0	0	0.225
350000	1	1	1	0	0.15	0.525	0	0	0.325
350400	1	1	1	0	0.1	0.425	0	0	0.325
350800	1	1	1	0	0.05	0.325	0	0	0.25
351200	1	1	1	0	0.05	0.25	0	0	0.175
351600	1	1	1	0	0.05	0.25	0	0	0.175
352000	1	1	1	0	0.05	0.25	0	0	0.175
352400	1	1	1	0	0.05	0.25	0	0	0.175
352800	1	1	1	0	0.05	0.25	0	0	0.175
353200	1	1	1	0	0.05	0.25	0	0	0.1
353600	1	1	1	0	0.05	0.35	0	0	0.1
354000	1	1	1	0	0	0.35	0	0	0
354400	1	1	1	0	0	0.35	0	0	0
354800	1	1	1	0	0	0.425	0	0	0
355200	1	1	1	0	0	0.425	0	0	0
355600	1	1	1	0	0	0.425	0	0	0
356000	1	1	1	0	0	0.45	0.025	0.1	0.1
356400	1	1	1	0	0	0.475	0.025	0.1	0.1
356800	1	1	1	0	0	0.575	0.025	0.1	0.2
357200	1	1	1	0	0	0.575	0.025	0.15	0.3
357600	1	1	1	0	0	0.475	0.025	0.15	0.3
358000	1	1	1	0	0	0.475	0.025	0.15	0.3
358400	1	1	1	0	0	0.475	0.025	0.15	0.3
358800	1	1	1	0	0	0.4	0.025	0.15	0.375
359200	1	1	1	0	0	0.475	0.025	0.15	0.375
359600	1	1	1	0	0.05	0.575	0.025	0.15	0.375
360000	1	1	1	0	0.05	0.575	0	0.05	0.275
360400	1	1	1	0	0.05	0.475	0	0.05	0.275
360800	1	1	1	0	0.1	0.475	0	0.05	0.175
361200	1	1	1	0	0.1	0.575	0	0	0.075
361600	1	1	1	0	0.1	0.575	0	0	0.15
362000	1	1	1	0	0.1	0.55	0	0	0.15
362400	1	1	1	0	0.1	0.55	0	0	0.15
362800	1	1	1	0	0.1	0.55	0	0	0.075
363200	1	1	1	0	0.1	0.475	0	0.05	0.175
363600	1	1	1	0	0.05	0.375	0	0.05	0.275
364000	1	1	1	0	0.05	0.275	0	0.05	0.275
364400	1	1	1	0	0.05	0.275	0	0.05	0.275
364800	1	1	1	0	0	0.175	0	0.05	0.275
365200	1	1	1	0	0.05	0.175	0	0.05	0.275
365600	1	1	1	0	0.05	0.175	0	0.05	0.2
366000	1	1	1	0	0.05	0.1	0	0.05	0.3
366400	1	1	1	0	0.05	0.2	0	0.05	0.3
366800	1	1	1	0	0.05	0.275	0	0.05	0.3
367200	1	1	1	0	0.05	0.275	0	0	0.2
367600	1	1	1	0	0.05	0.275	0	0	0.175
368000	1	1	1	0	0.05	0.275	0	0	0.175
368400	1	1	1	0	0.05	0.35	0	0	0.175
368800	1	1	1	0	0.05	0.35	0	0	0.175
369200	1	1	1	0	0	0.325	0	0	0.275
369600	1	1	1	0	0	0.325	0	0	0.35
370000	1	1	1	0	0.05	0.425	0	0	0.35
370400	1	1	1	0	0.05	0.325	0	0	0.35
370800	1	1	1	0	0.05	0.25	0	0	0.425
371200	1	1	1	0	0.05	0.325	0	0	0.5
371600	1	1	1	0	0.15	0.425	0	0	0.425
372000	1	1	1	0	0.15	0.425	0	0	0.5
372400	1	1	1	0	0.15	0.35	0	0	0.575
372800	1	1	1	0	0.15	0.35	0	0	0.575
373200	1	1	1	0	0.15	0.375	0	0	0.55
373600	1	1	1	0	0.15	0.375	0	0	0.55
374000	1	1	1	0	0.1	0.275	0	0	0.45
374400	1	1	1	0	0.1	0.275	0	0	0.525
374800	1	1	1	0	0.1	0.35	0	0	0.45
375200	1	1	1	0	0.1	0.35	0	0	0.375
375600	1	1	1	0	0	0.25	0	0	0.375
376000	1	1	1	0	0	0.35	0	0	0.4
376400	1	1	1	0	0	0.35	0	0	0.425
376800	1	1	1	0	0	0.45	0	0	0.425
377200	1	1	1	0	0	0.45	0	0	0.35
377600	1	1	1	0	0	0.45	0	0	0.35
378000	1	1	1	0	0	0.45	0	0	0.425
378400	1	1	1	0	0	0.45	0	0	0.425
378800	1	1	1	0	0.05	0.475	0	0	0.425
379200	1	1	1	0	0.05	0.475	0	0	0.425
379600	1	1	1	0	0.1	0.575	0	0	0.5
380000	1	1	1	0	0.1	0.475	0	0	0.475
380400	1	1	1	0	0.1	0.55	0	0	0.375
380800	1	1	1	0	0.1	0.45	0	0	0.45
381200	1	1	1	0	0.1	0.35	0	0	0.525
381600	1	1	1	0	0.1	0.35	0	0	0.55
382000	1	1	1	0	0.1	0.425	0	0	0.475
382400	1	1	1	0	0.1	0.425	0	0	0.4
382800	1	1	1	0	0.05	0.325	0	0	0.4
383200	1	1	1	0	0.05	0.25	0	0	0.475
383600	1	1	1	0	0	0.225	0	0	0.4
384000	1	1	1	0	0	0.3	0	0	0.4
384400	1	1	1	0	0	0.225	0	0	0.4
384800	1	1	1	0	0	0.325	0	0	0.4
385200	1	1	1	0	0	0.325	0	0	0.325
385600	1	1	1	0	0	0.325	0	0	0.3
386000	1	1	1	0	0	0.325	0	0	0.3
386400	1	1	1	0	0.05	0.425	0	0	0.3
386800	1	1	1	0	0.05	0.425	0	0	0.3
387200	1	1	1	0	0.05	0.525	0	0	0.225
387600	1	1	1	0	0.05	0.45	0	0	0.3
388000	1	1	1	0	0.05	0.375	0	0	0.225
388400	1	1	1	0	0.05	0.45	0	0	0.225
388800	1	1	1	0	0.05	0.35	0	0	0.15
389200	1	1	1	0	0.05	0.425	0	0	0.15
389600	1	1	1	0	0.05	0.5	0	0	0.15
390000	1	1	1	0	0.05	0.525	0	0	0.15
390400	1	1	1	0	0	0.525	0	0	0.15
390800	1	1	1	0	0	0.525	0	0	0.15
391200	1	1	1	0	0	0.525	0	0	0.15
391600	1	1	1	0	0	0.525	0	0	0.075
392000	1	1	1	0	0	0.525	0	0	0.15
392400	1	1	1	0	0	0.55	0	0	0.225
392800	1	1	1	0	0	0.65	0	0	0.225
393200	1	1	1	0	0	0.65	0	0	0.225
393600	1	1	1	0	0	0.575	0	0	0.15
394000	1	1	1	0	0.05	0.575	0	0	0.15
394400	1	1	1	0	0.1	0.575	0	0	0.225
394800	1	1	1	0	0.1	0.675	0	0	0.325
395200	1	1	1	0	0.1	0.575	0	0	0.325
395600	1	1	1	0	0.1	0.65	0	0	0.4
396000	1	1	1	0	0.1	0.65	0	0	0.325
396400	1	1	1	0	0.1	0.625	0	0	0.35
396800	1	1	1	0	0.1	0.525	0	0	0.45
397200	1	1	1	0	0.1	0.45	0	0	0.45
397600	1	1	1	0	0.1	0.55	0	0	0.55
398000	1	1	1	0	0.05	0.55	0	0	0.55
398400	1	1	1	0	0	0.45	0	0	0.475
398800	1	1	1	0	0	0.45	0	0	0.375
399200	1	1	1	0	0	0.45	0	0	0.375
399600	1	1	1	0	0	0.475	0	0	0.375
400000	1	1	1	0	0	0.475	0	0	0.375
