# Supplementary material
Source: ML conference proceedings conference paper supplement (https://openreview.net/forum?id=Lb8ZnWW_In6)
Supplement: supplementary_material [file craft_t8.xlsx]

## Sheet: aqrm
0	0	0	0	0	0	0	0	0	0
0	0	0	0	0	0	0	0	0	0
0	0	0	0	0	0	0	0	0	0
0	0	0	0	0	0	0	0	0	0
0	0	0	0	0	0	0	0	0	0
0	0	0	0	0	0	0	0	0	0
0	0	0	0	0	0	0	0	0	0
0	0	0	0	0	0	0	0	0	0
0	0	0	0	0	0	0	0	0	0
0	0	0	0	0	0	0	0	0	0
0	0	0	0	0	0	0	0	0	0
0	0	0	0	0	0	0	0	0	0
0	0	0	0	0	0	0	0	0	0
0	0	0	0	0	0	0	0	0	0
0	0	0	0	0	0	0	0	0	0
0	0	0	0	0	0	0	0	0	0
0	0	0	0	0	0	0	0	0	0
0	0	0	0	0	0	0	0	0	0
0	0	0	0	0	0	0	0	0	0
0	0	0	0	0	0	0	0	0	0
0	0	0	0	0	0	0	0	0	0
0	0	0	0	0	0	0	0	0	0
0	0	0	0	0	0	0	0	0	0
0	0	0	0	0	0	0	0	0	0
0	0	0	0	0	0	0	0	0	0
0	0	0	0	0	0	0	0	0	0
0	0	0	0	0	0	0	0	0	0
0	0	0	0	0	0	0	0	0	0
0	0	0	0	0	0	0	0	0	0
0	0	0	0	0	0	0	0	0	0
0	0	0	0	0	0	0	0	0	0
0	0	0	0	0	0	0	0	0	0
0	0	0	0	0	0	0	0	0	0
0	0	0	0	0	0	0	0	0	0
0	0	0	0	0	0	0	0	0	0
0	0	0	0	0	0	0	0	0	0
0	0	0	0	0	0	0	0	0	0
0	0	0	0	0	0	0	0	0	0
0	0	0	0	0	0	0	0	0	0
0	0	0	0	0	0	0	0	0	0
0	0	0	0	0	0	0	0	0	0
0	0	0	0	0	0	0	0	0	0
0	0	0	0	0	0	0	0	0	0
0	0	0	0	0	0	0	0	0	0
0	0	0	0	0	0	0	0	0	0
0	0	0	0	0	0	0	0	0	0
0	0	0	0	0	0	0	0	0	0
0	0	0	0	0	0	0	0	0	0
0	0	0	0	0	0	0	0	0	0
0	0	0	0	0	0	0	0	0	0
0	0	0	0	0	0	0	0	0	0
0	0	0	0	0	0	0	0	0	0
0	0	0	0	0	0	0	0	0	0
0	0	0	0	0	0	0	0	0	0
0	0	0	0	0	0	0	0	0	0
0	0	0	0	0	0	0	0	0	0
0	0	0	0	0	0	0	0	0	0
0	0	0	0	0	0	0	0	0	0
0	0	0	0	0	0	0	0	0	0
0	0	0	0	0	0	0	0	0	0
0	0	0	0	0	0	0	0	0	0
0	0	0	0	0	0	0	0	0	0
0	0	0	0	0	0	0	0	0	0
0	0	0	0	0	0	0	0	0	0
0	0	0	0	0	0	0	0	0	0
0	0	0	0	0	0	0	0	0	0
0	0	0	0	0	0	0	0	0	0
0	0	0	0	0	0	0	0	0	0
0	0	0	0	0	0	0	0	0	0
0	0	0	0	0	0	0	0	0	0
0	0	0	0	0	0	0	0	0	0
0	0	0	0	0	0	0	0	0	0
0	0	0	0	0	0	0	0	0	0
0	0	0	0	0	0	0	0	0	0
0	0	0	0	0	0	0	0	0	0
0	0	0	0	0	0	0	0	0	0
0	0	0	0	0	0	0	0	0	0
0	0	0	0	0	0	0	0	0	0
0	0	0	0	0	0	0	0	0	0
0	0	0	0	0	0	0	0	0	0
0	0	0	0	0	0	0	0	0	0
0	0	0	0	0	0	0	0	0	0
0	0	0	0	0	0	0	0	0	0
0	0	0	0	0	0	0	0	0	0
0	0	0	0	0	0	0	0	0	0
0	0	0	0	0	0	0	0	0	0
0	0	0	0	0	0	0	0	0	1
0	0	0	0	0	0	0	0	0	0
0	0	0	0	0	0	0	0	0	0
0	0	0	0	0	0	0	0	0	0
0	0	0	0	0	0	0	0	0	0
0	0	0	0	0	0	0	0	0	0
0	0	0	0	0	0	0	0	0	0
0	0	0	0	0	0	0	0	0	0
0	0	0	0	0	0	0	0	0	0
0	0	0	0	0	0	0	0	0	0
0	0	0	0	0	0	0	0	0	0
0	0	0	0	0	0	0	0	0	0
0	0	0	0	0	0	0	0	0	0
0	0	0	0	0	0	0	0	0	0
0	0	0	0	0	0	0	0	0	0
0	0	0	0	0	0	0	0	0	0
0	0	0	0	0	0	0	0	0	0
0	0	0	0	0	0	0	0	0	0
0	0	0	0	0	0	0	0	0	0
0	0	0	0	0	0	0	0	0	0
0	0	0	0	0	0	0	0	0	0
0	0	0	0	0	0	0	0	0	0
0	0	0	0	0	0	0	0	0	0
0	0	0	0	0	0	0	0	0	0
0	0	0	0	0	0	0	0	0	0
0	0	0	0	0	0	0	0	0	0
0	0	0	0	0	0	0	0	0	0
0	0	0	0	0	0	0	0	0	0
0	0	0	0	0	0	0	0	0	0
0	0	0	0	0	0	0	0	0	0
0	0	0	0	0	0	0	0	0	0
0	0	0	0	0	0	0	0	0	0
0	0	0	0	0	0	0	0	0	0
0	0	0	0	0	0	0	0	0	0
0	0	0	0	0	0	0	0	0	0
0	0	0	0	0	0	0	0	0	0
0	0	0	0	0	0	0	0	0	0
0	0	0	0	0	0	0	0	0	0
0	0	0	0	0	0	0	0	0	0
0	0	0	0	0	0	0	0	0	0
0	0	0	0	0	0	0	0	0	0
0	0	0	0	0	0	0	0	0	0
0	0	0	0	0	0	0	0	0	0
0	0	0	0	0	0	0	0	0	0
0	0	0	0	0	0	0	0	0	0
0	0	0	0	0	0	0	0	0	0
0	0	0	0	0	0	0	0	0	0
0	0	0	0	0	0	0	0	0	0
0	0	0	0	0	0	0	0	0	0
0	0	0	0	0	0	0	0	0	0
0	0	0	0	0	0	0	0	0	0
0	0	0	0	0	0	0	0	0	0
0	0	0	0	0	0	0	0	0	0
0	0	0	0	0	0	0	0	0	0
0	0	0	0	0	0	0	0	0	0
0	0	0	0	0	0	0	0	0	0
0	0	0	0	0	0	0	0	0	0
0	0	0	0	0	0	0	0	0	0
0	0	0	0	0	0	0	0	0	0
0	0	0	0	0	0	0	0	0	0
0	0	0	0	0	0	0	0	0	0
0	0	0	0	0	0	0	0	0	0
0	0	0	0	0	0	0	0	0	0
0	0	0	0	0	0	0	0	0	0
0	0	0	0	0	0	0	0	0	0
0	0	0	0	0	0	0	0	0	0
0	0	0	0	1	0	0	0	0	0
0	0	0	0	0	0	0	0	0	0
0	0	0	0	0	0	0	0	0	0
0	0	0	0	0	0	0	0	0	0
0	0	0	0	0	0	0	0	0	0
0	0	0	0	0	0	0	0	0	1
0	0	0	0	0	0	0	0	0	0
0	0	0	0	0	1	0	0	0	0
0	0	0	0	0	0	0	0	0	0
0	0	0	0	0	1	0	0	0	0
0	0	0	0	0	0	0	0	0	0
0	0	0	0	0	0	0	0	0	0
0	0	0	0	0	0	0	0	0	0
0	0	0	0	0	0	0	0	0	0
0	0	0	0	0	0	0	0	0	0
0	0	0	0	0	1	0	0	0	0
0	0	0	0	0	0	0	0	0	0
0	0	0	0	0	0	0	0	0	0
0	0	0	0	0	0	0	0	0	0
0	0	0	0	0	0	0	0	0	0
0	0	0	0	0	0	0	0	0	0
0	0	0	0	0	0	0	0	0	0
0	0	0	0	0	0	0	0	0	1
0	0	0	0	0	0	0	0	0	0
0	0	0	0	0	0	0	0	0	1
0	0	0	0	0	1	0	0	0	0
0	0	0	0	0	0	0	0	0	0
0	0	0	0	0	0	0	0	0	0
0	0	0	0	0	0	0	0	0	0
0	0	0	0	0	1	0	0	0	0
0	0	0	0	0	1	0	0	0	0
0	0	0	0	0	0	0	0	0	0
0	0	0	0	0	0	0	0	0	0
0	0	0	0	0	1	0	0	0	1
0	0	0	0	0	0	0	0	0	0
0	0	0	0	0	1	0	0	0	1
0	0	0	0	0	0	0	0	0	0
0	0	0	0	0	1	0	0	0	1
0	0	0	0	0	1	0	0	0	1
0	0	0	0	0	1	0	0	0	1
0	0	0	0	0	0	0	0	0	1
0	0	0	0	0	1	0	0	0	1
0	0	0	0	0	1	0	0	0	1
0	0	0	0	0	1	0	0	0	1
0	0	0	0	0	1	0	0	0	1
0	0	0	0	0	1	0	0	0	1
0	0	0	0	0	1	0	0	0	1
0	0	0	0	0	1	0	0	0	1
0	0	0	0	0	1	0	0	0	1
0	0	0	0	1	1	0	0	0	1
0	0	0	0	0	1	1	0	0	1
0	0	0	0	0	1	0	0	0	1
0	0	0	0	0	1	0	0	0	1
0	0	0	1	0	1	0	0	0	1
0	0	0	0	0	1	0	0	0	1
0	0	0	0	1	1	0	0	0	1
0	0	0	0	0	1	0	0	0	1
0	0	0	1	0	1	0	0	0	1
0	0	0	1	0	1	0	0	0	1
0	0	0	0	0	1	0	0	0	1
0	0	0	0	0	1	0	0	0	1
0	0	0	0	0	1	0	0	0	1
0	0	0	0	1	1	0	0	0	1
0	0	0	1	0	1	0	0	0	1
0	1	0	0	0	1	0	0	0	1
0	0	0	1	1	1	0	1	0	1
0	0	0	0	0	1	0	0	0	1
0	0	0	1	1	1	0	0	0	1
0	0	0	0	0	1	0	0	0	1
0	0	0	0	0	1	0	0	0	1
0	0	0	1	0	1	0	0	0	1
0	0	0	1	1	1	0	0	0	1
0	0	0	1	0	1	0	0	0	1
0	0	0	1	1	1	0	0	0	1
0	0	0	1	1	1	0	0	0	1
0	0	0	1	1	1	0	0	0	1
0	0	0	1	0	1	0	0	0	1
0	0	0	1	0	1	0	0	0	1
0	0	0	1	1	1	0	0	0	1
0	0	0	1	1	1	0	0	0	1
0	0	0	1	1	1	0	0	0	1
0	0	0	1	1	1	0	0	0	1
0	0	0	1	1	1	0	0	0	1
0	0	0	1	1	1	0	0	0	1
0	0	0	1	1	1	0	0	0	1
0	0	0	1	1	1	0	0	0	1
0	0	0	1	1	1	0	0	0	1
0	0	0	1	1	1	0	0	0	1
0	0	0	1	1	1	0	0	0	1
0	0	0	0	1	1	0	0	0	1
0	0	0	1	1	1	0	0	0	1
0	0	0	1	1	1	0	0	0	1
0	0	0	1	1	1	0	0	0	1
0	0	0	1	1	1	0	0	0	1
0	0	0	1	1	1	0	0	0	1
0	0	0	1	1	1	0	0	0	1
0	0	0	1	1	1	0	0	0	1
0	0	0	1	1	1	0	0	0	1
0	0	0	1	1	1	0	0	0	1
0	0	0	1	1	1	0	0	0	1
0	0	0	1	1	1	0	0	0	1
0	0	0	1	1	1	0	0	0	1
0	0	0	1	1	1	0	0	0	1
0	0	0	1	1	1	0	0	0	1
0	0	0	1	1	1	0	0	0	1
0	0	0	1	1	1	0	0	0	1
0	0	0	1	1	1	0	0	0	1
0	0	0	1	1	1	0	0	0	1
0	0	0	1	1	1	0	0	0	1
0	0	0	1	1	1	0	0	0	1
0	0	0	1	1	1	0	0	0	1
0	0	0	1	1	1	0	0	0	1
0	0	0	1	1	1	0	0	0	1
0	0	0	1	1	1	0	0	0	1
0	0	0	1	1	1	0	0	0	1
0	0	0	1	1	1	0	0	0	1
0	0	0	1	1	1	0	0	0	1
0	0	0	1	1	1	0	0	0	1
0	0	0	1	1	1	0	0	0	1
0	0	0	1	1	1	0	0	0	1
0	0	0	1	1	1	0	0	0	1
0	0	0	1	1	1	0	0	1	1
0	0	0	1	1	1	0	0	0	1
0	0	0	1	1	1	0	0	0	1
0	0	0	1	1	1	0	0	0	1
0	0	0	1	1	1	0	0	0	1
0	0	0	1	1	1	0	0	0	1
0	0	0	1	1	1	0	0	0	1
0	0	0	1	1	1	0	0	0	1
0	0	0	1	1	1	0	0	0	1
0	0	0	1	1	1	0	0	0	1
0	0	0	1	1	1	0	0	0	1
0	0	0	1	1	1	0	0	0	1
0	0	0	1	1	1	0	0	0	1
0	0	0	1	1	1	0	0	0	1
0	0	0	1	1	1	0	0	0	1
0	0	0	1	1	1	0	0	0	1
0	0	0	1	1	1	0	0	0	1
0	0	0	1	1	1	0	0	0	1
1	0	0	1	1	1	0	0	0	1
0	0	0	1	1	1	0	0	0	1
0	0	0	1	1	1	0	0	0	1
0	0	0	1	1	1	0	0	0	1
0	0	0	1	1	1	0	0	0	1
1	0	0	1	1	1	0	0	0	1
0	0	0	1	1	1	0	0	0	1
0	0	0	1	1	1	0	0	0	1
0	0	0	1	1	1	0	0	0	1
0	0	0	1	1	1	1	0	0	1
0	0	0	1	1	1	1	0	0	1
0	0	0	1	1	1	0	0	0	1
0	0	0	1	1	1	0	0	0	1
0	0	0	1	1	1	0	0	0	1
0	0	0	1	1	1	0	0	0	1
0	0	0	1	1	1	0	0	0	1
0	0	0	1	1	1	0	0	0	1
0	0	0	1	1	1	0	0	0	1
0	0	0	1	1	1	0	0	0	1
0	0	0	1	1	1	0	0	0	1
0	0	0	1	1	1	0	0	0	1
0	0	0	1	1	1	0	0	0	1
0	0	0	1	1	1	0	0	0	1
0	0	0	1	1	1	0	0	0	1
0	0	0	1	1	1	0	0	0	1
0	0	0	1	1	1	0	0	0	1
0	0	0	1	1	1	0	0	0	1
0	0	0	1	1	1	0	0	0	1
0	0	0	1	1	1	0	0	0	1
0	0	0	1	1	1	0	1	0	1
0	0	0	1	1	1	0	0	0	1
0	0	0	1	1	1	0	0	0	1
0	0	0	1	1	1	0	0	0	1
0	0	0	1	1	1	0	0	0	1
0	0	0	1	1	1	0	1	0	1
0	0	0	1	1	1	0	0	0	1
0	0	0	1	1	1	0	0	0	1
0	0	0	1	1	1	0	0	0	1
0	0	0	1	1	1	0	0	0	1
0	0	0	1	1	1	0	0	0	1
0	0	0	1	1	1	0	0	0	1
0	0	0	1	1	1	0	0	0	1
0	0	0	1	1	1	0	0	0	1
0	0	0	1	1	1	0	1	0	1
0	0	0	1	1	1	0	1	0	1
0	0	0	1	1	1	0	1	0	1
0	0	0	1	1	1	0	0	0	1
0	0	0	1	1	1	0	0	0	1
0	0	0	1	1	1	0	0	0	1
0	0	0	1	1	1	0	1	0	1
0	0	0	1	1	1	0	1	0	1
0	0	0	1	1	1	0	0	0	1
0	0	0	1	1	1	0	1	0	1
0	0	0	1	1	1	0	0	0	1
1	0	0	1	1	1	0	1	0	1
0	0	0	1	1	1	0	1	0	1
1	0	0	1	1	1	0	1	0	1
0	0	0	1	1	1	0	1	0	1
0	0	0	1	1	1	0	1	0	1
1	0	0	1	1	1	0	1	0	1
0	0	0	1	1	1	0	1	0	1
0	0	0	1	1	1	0	1	0	1
0	0	0	1	1	1	0	1	0	1
0	0	0	1	1	1	0	1	0	1
0	0	0	1	1	1	0	1	0	1
0	0	0	1	1	1	0	1	0	1
0	0	0	1	1	1	0	1	0	1
0	0	0	1	1	1	0	1	0	1
0	0	0	1	1	1	0	1	0	1
0	0	0	1	1	1	0	1	0	1
0	0	0	1	1	1	0	1	0	1
0	0	0	1	1	1	0	1	0	1
1	0	0	1	1	1	0	1	0	1
1	0	0	1	1	1	0	1	0	1
1	0	0	1	1	1	0	1	0	1
1	0	0	1	1	1	0	1	0	1
1	0	0	1	1	1	0	1	0	1
1	0	0	1	1	1	0	1	0	1
1	0	0	1	1	1	0	1	0	1
1	0	0	1	1	1	0	1	0	1
1	0	0	1	1	1	0	1	0	1
1	0	0	1	1	1	0	1	0	1
1	0	0	1	1	1	0	1	0	1
1	0	0	1	1	1	0	1	0	1
0	0	0	1	1	1	0	1	0	1
1	0	0	1	1	1	0	1	0	1
1	0	0	1	1	1	0	1	0	1
1	0	0	1	1	1	0	1	0	1
1	0	0	1	1	1	0	1	0	1
1	0	0	1	1	1	0	1	0	1
1	0	0	1	1	1	0	1	0	1
1	0	0	1	1	1	0	1	0	1
1	0	0	1	1	1	0	1	0	1
1	0	0	1	1	1	0	1	0	1
1	0	0	1	1	1	0	1	0	1
1	0	0	1	1	1	0	1	0	1
1	0	0	1	1	1	0	1	0	1
1	0	0	1	1	1	0	0	0	1
1	0	0	1	1	1	0	0	0	1
1	0	0	1	1	1	0	0	0	1
1	0	0	1	1	1	0	0	0	1
1	0	0	1	1	1	0	0	0	1
1	0	0	1	1	1	0	0	0	1
1	0	0	1	1	1	0	0	0	1
1	0	0	1	1	1	0	0	0	1
1	0	0	1	1	1	0	0	0	1
1	0	0	1	1	1	0	0	0	1
1	0	0	1	1	1	0	0	0	1
1	0	0	1	1	1	0	0	0	1
1	0	0	1	1	1	0	0	0	1
1	0	0	1	1	1	0	0	0	1
1	0	0	1	1	1	0	0	0	1
1	0	0	1	1	1	0	0	0	1
1	0	0	1	1	1	0	0	0	1
1	0	0	1	1	1	0	0	0	1
1	0	0	1	1	1	0	0	0	1
1	0	0	1	1	1	0	0	0	1
1	0	0	1	1	1	0	0	0	1
1	0	0	1	1	1	0	0	0	1
1	0	0	1	1	1	0	0	0	1
1	0	0	1	1	1	0	0	0	1
1	0	0	1	1	1	0	0	0	1
1	0	0	1	1	1	0	0	0	1
1	0	0	1	1	1	0	0	0	1
1	0	0	1	1	1	0	0	0	1
1	0	0	1	1	1	0	0	0	1
1	0	0	1	1	1	0	0	0	1
1	0	0	1	1	1	0	0	0	1
1	0	0	1	1	1	0	0	0	1
1	0	0	1	1	1	0	0	0	1
1	0	0	1	1	1	0	0	0	1
1	0	0	1	1	1	0	0	0	1
1	0	0	1	1	1	0	0	0	1
1	0	0	1	1	1	0	0	0	1
1	0	0	1	1	1	0	0	0	1
1	1	0	1	1	1	0	0	0	1
1	0	0	1	1	1	0	0	0	1
1	0	0	1	1	1	0	0	0	1
1	0	0	1	1	1	0	0	0	1
1	0	1	1	1	1	0	0	0	1
1	0	0	1	1	1	0	0	0	1
1	0	0	1	1	1	0	0	0	1
1	0	0	1	1	1	0	0	0	1
1	0	0	1	1	1	0	0	0	1
1	0	0	1	1	1	0	0	0	1
1	0	0	1	1	1	0	0	0	1
1	0	0	1	1	1	0	0	0	1
1	0	0	1	1	1	0	0	0	1
1	0	0	1	1	1	0	0	0	1
1	0	0	1	1	1	0	0	0	1
1	0	0	1	1	1	0	0	0	1
1	0	0	1	1	1	0	0	0	1
1	0	0	1	1	1	0	1	0	1
1	0	0	1	1	1	0	0	0	1
1	0	0	1	1	1	0	0	0	1
1	0	0	1	1	1	0	1	0	1
1	0	0	1	1	1	0	1	0	1
1	0	0	1	1	1	0	1	0	1
1	0	0	1	1	1	0	0	0	1
1	0	0	1	1	1	0	0	0	1
1	0	0	1	1	1	0	1	0	1
1	0	0	1	1	1	0	0	0	1
1	0	0	1	1	1	0	1	0	1
1	0	0	1	1	1	0	1	0	1
1	0	0	1	1	1	0	0	0	1
1	0	0	1	1	1	0	1	0	1
1	0	0	1	1	1	0	1	0	1
1	0	0	1	1	1	0	1	0	1
1	0	0	1	1	1	0	0	0	1
1	0	0	1	1	1	0	1	0	1
1	0	0	1	1	1	0	1	0	1
1	0	0	1	1	1	0	1	0	1
1	0	0	1	1	1	0	1	0	1
1	1	0	1	1	1	0	1	0	1
1	0	0	1	1	1	0	1	0	1
1	0	0	1	1	1	0	1	0	1
1	0	0	1	1	1	0	1	0	1
1	0	0	1	1	1	0	1	0	1
1	0	0	1	1	1	0	1	0	1
1	0	0	1	1	1	0	1	0	1
1	0	0	1	1	1	0	1	0	1
1	0	0	1	1	1	0	1	0	1
1	0	0	1	1	1	0	1	0	1
1	1	0	1	1	1	0	1	0	1
1	0	0	1	1	1	0	1	0	1
1	0	0	1	1	1	0	1	0	1
1	0	0	1	1	1	0	1	0	1
1	0	0	1	1	1	0	1	0	1
1	0	0	1	1	1	0	1	0	1
1	0	0	1	1	1	0	1	0	1
1	0	0	1	1	1	0	1	0	1
1	1	0	1	1	1	0	1	0	1
1	0	0	1	1	1	0	1	0	1
1	1	0	1	1	1	0	1	0	1
1	0	0	1	1	1	0	1	0	1
1	1	0	1	1	1	0	1	0	1
1	1	0	1	1	1	0	1	0	1
1	1	0	1	1	1	0	1	0	1
1	0	0	1	1	1	0	1	0	1
1	0	0	1	1	1	0	1	0	1
1	1	0	1	1	1	0	1	0	1
1	0	0	1	1	1	0	1	0	1
1	0	0	1	1	1	0	1	0	1
1	1	0	1	1	1	0	1	0	1
1	1	0	1	1	1	0	1	0	1
1	1	0	1	1	1	0	1	0	1
1	1	0	1	1	1	0	1	0	1
1	1	0	1	1	1	0	1	0	1
1	1	0	1	1	1	0	1	0	1
1	1	0	1	1	1	0	1	0	1
1	1	0	1	1	1	0	1	0	1
1	1	0	1	1	1	0	1	0	1
1	1	0	1	1	1	0	1	0	1
1	1	0	1	1	1	0	1	0	1
1	1	0	1	1	1	0	1	0	1
1	1	0	1	1	1	0	1	0	1
1	1	0	1	1	1	0	1	0	1
1	1	0	1	1	1	0	1	0	1
1	1	0	1	1	1	0	1	0	1
1	1	0	1	1	1	0	1	0	1
1	1	0	1	1	1	0	1	0	1
1	1	0	1	1	1	0	1	0	1
1	1	0	1	1	1	0	1	0	1
1	1	0	1	1	1	0	1	0	1
1	1	0	1	1	1	0	1	0	1
1	1	0	1	1	1	0	1	0	1
1	1	0	1	1	1	0	1	0	1
1	1	0	1	1	1	0	1	0	1
1	1	0	1	1	1	0	1	0	1
1	1	0	1	1	1	0	1	0	1
1	1	0	1	1	1	0	1	0	1
1	1	0	1	1	1	0	1	0	1
1	1	0	1	1	1	0	1	0	1
1	1	0	1	1	1	0	1	0	1
1	1	0	1	1	1	0	1	0	1
1	1	0	1	1	1	0	1	0	1
1	1	0	1	1	1	1	1	0	1
1	1	0	1	1	1	0	1	0	1
1	1	0	1	1	1	0	1	0	1
1	1	0	1	1	1	0	1	0	1
1	1	0	1	1	1	0	1	0	1
1	1	0	1	1	1	0	1	0	1
1	1	0	1	1	1	0	1	0	1
1	1	0	1	1	1	0	1	0	1
1	1	0	1	1	1	0	1	0	1
1	1	0	1	1	1	0	1	0	1
1	1	0	1	1	1	0	1	0	1
1	1	0	1	1	1	0	1	0	1
1	1	0	1	1	1	0	1	0	1
1	1	0	1	1	1	0	1	0	1
1	1	0	1	1	1	0	1	0	1
1	1	0	1	1	1	0	1	0	1
1	1	0	1	1	1	0	1	0	1
1	1	0	1	1	1	0	1	0	1
1	1	0	1	1	1	0	1	0	1
1	1	0	1	1	1	0	1	0	1
1	1	0	1	1	1	0	1	0	1
1	1	0	1	1	1	0	1	0	1
1	1	0	1	1	1	0	1	0	1
1	1	0	1	1	1	0	1	0	1
1	1	0	1	1	1	0	1	0	1
1	1	0	1	1	1	0	1	0	1
1	1	0	1	1	1	0	1	0	1
1	1	0	1	1	1	0	1	0	1
1	1	0	1	1	1	0	1	0	1
1	1	0	1	1	1	0	1	0	1
1	1	0	1	1	1	0	1	0	1
1	1	0	1	1	1	0	1	0	1
1	1	0	1	1	1	0	1	0	1
1	1	0	1	1	1	0	1	0	1
1	1	0	1	1	1	0	1	0	1
1	1	0	1	1	1	0	1	0	1
1	1	0	1	1	1	0	1	0	1
1	1	0	1	1	1	0	1	0	1
1	1	0	1	1	1	0	1	0	1
1	1	0	1	1	1	0	1	0	1
1	1	0	1	1	1	0	1	0	1
1	1	0	1	1	1	0	1	0	1
1	1	0	1	1	1	0	1	0	1
1	1	0	1	1	1	0	1	0	1
1	1	0	1	1	1	0	1	0	1
1	1	0	1	1	1	0	1	0	1
1	1	0	1	1	1	0	1	0	1
1	1	0	1	1	1	0	1	0	1
1	1	0	1	1	1	0	1	0	1
1	1	0	1	1	1	0	1	0	1
1	1	0	1	1	1	0	1	0	1
1	1	0	1	1	1	0	1	0	1
1	1	0	1	1	1	0	1	1	1
1	1	0	1	1	1	0	1	0	1
1	1	0	1	1	1	0	1	0	1
1	1	0	1	1	1	0	1	0	1
1	1	0	1	1	1	0	1	0	1
1	1	0	1	1	1	0	1	0	1
1	1	0	1	1	1	0	1	0	1
1	1	0	1	1	1	0	1	0	1
1	1	0	1	1	1	0	1	0	1
1	1	0	1	1	1	0	1	0	1
1	1	0	1	1	1	0	1	0	1
1	1	0	1	1	1	0	1	0	1
1	1	0	1	1	1	0	1	0	1
1	1	0	1	1	1	0	1	0	1
1	1	0	1	1	1	0	1	0	1
1	1	0	1	1	1	0	1	0	1
1	1	0	1	1	1	0	1	0	1
1	1	0	1	1	1	0	1	0	1
1	1	0	1	1	1	0	1	0	1
1	1	0	1	1	1	0	1	0	1
1	1	0	1	1	1	0	1	0	1
1	1	0	1	1	1	0	1	0	1
1	1	0	1	1	1	0	1	0	1
1	1	0	1	1	1	0	1	0	1
1	1	0	1	1	1	0	1	0	1
1	1	0	1	1	1	0	1	0	1
1	1	0	1	1	1	0	1	0	1
1	1	0	1	1	1	0	1	0	1
1	1	0	1	1	1	0	1	0	1
1	1	0	1	1	1	0	1	0	1
1	1	0	1	1	1	0	1	0	1
1	1	0	1	1	1	0	1	0	1
1	1	0	1	1	1	0	1	0	1
1	1	0	1	1	1	0	1	0	1
1	1	0	1	1	1	0	1	0	1
1	1	0	1	1	1	0	1	0	1
1	1	0	1	1	1	0	1	0	1
1	1	0	1	1	1	0	1	0	1
1	1	0	1	1	1	0	1	0	1
1	1	0	1	1	1	0	1	0	1
1	1	0	1	1	1	0	1	0	1
1	1	0	1	1	1	0	1	0	1
1	1	0	1	1	1	0	1	0	1
1	1	0	1	1	1	0	1	0	1
1	1	0	1	1	1	0	1	0	1
1	1	0	1	1	1	0	1	0	1
1	1	0	1	1	1	0	1	0	1
1	1	0	1	1	1	0	1	0	1
1	1	0	1	1	1	0	1	0	1
1	1	0	1	1	1	0	1	0	1
1	1	0	1	1	1	0	1	0	1
1	1	0	1	1	1	0	1	0	1
1	1	0	1	1	1	0	1	0	1
1	1	0	1	1	1	0	1	0	1
1	1	0	1	1	1	0	1	0	1
1	1	0	1	1	1	0	1	0	1
1	1	0	1	1	1	0	1	0	1
1	1	0	1	1	1	0	1	0	1
1	1	0	1	1	1	0	1	0	1
1	1	0	1	1	1	0	1	0	1
1	1	0	1	1	1	0	1	0	1
1	1	0	1	1	1	0	1	0	1
1	1	0	1	1	1	0	1	0	1
1	1	0	1	1	1	0	1	0	1
1	1	0	1	1	1	0	1	0	1
1	1	0	1	1	1	0	1	0	1
1	1	0	1	1	1	0	1	0	1
1	1	0	1	1	1	0	1	0	1
1	1	0	1	1	1	0	1	0	1
1	1	0	1	1	1	0	1	0	1
1	1	1	1	1	1	0	1	0	1
1	1	0	1	1	1	0	1	0	1
1	1	0	1	1	1	0	1	0	1
1	1	0	1	1	1	0	1	0	1
1	1	0	1	1	1	0	1	0	1
1	1	0	1	1	1	0	1	0	1
1	1	0	1	1	1	0	1	0	1
1	1	0	1	1	1	0	1	0	1
1	1	0	1	1	1	0	1	0	1
1	1	0	1	1	1	0	1	0	1
1	1	0	1	1	1	0	1	0	1
1	1	0	1	1	1	0	1	0	1
1	1	0	1	1	1	0	1	0	1
1	1	0	1	1	1	0	1	0	1
1	1	0	1	1	1	0	1	0	1
1	1	0	1	1	1	0	1	0	1
1	1	0	1	1	1	0	1	0	1
1	1	0	1	1	1	0	1	0	1
1	1	0	1	1	1	0	1	0	1
1	1	0	1	1	1	0	1	0	1
1	1	0	1	1	1	0	1	0	1
1	1	0	1	1	1	0	1	0	1
1	1	0	1	1	1	0	1	0	1
1	1	0	1	1	1	0	1	0	1
1	1	1	1	1	1	0	1	0	1
1	1	0	1	1	1	0	1	0	1
1	1	0	1	1	1	0	1	0	1
1	1	1	1	1	1	0	1	0	1
1	1	0	1	1	1	0	1	0	1
1	1	0	1	1	1	0	1	0	1
1	1	1	1	1	1	0	1	0	1
1	1	1	1	1	1	0	1	0	1
1	1	1	1	1	1	0	1	0	1
1	1	1	1	1	1	0	1	0	1
1	1	0	1	1	1	0	1	0	1
1	1	0	1	1	1	0	1	0	1
1	1	1	1	1	1	0	1	0	1
1	1	1	1	1	1	0	1	0	1
1	1	1	1	1	1	0	1	0	1
1	1	1	1	1	1	0	1	0	1
1	1	1	1	1	1	0	1	0	1
1	1	1	1	1	1	0	1	0	1
1	1	1	1	1	1	0	1	0	1
1	1	1	1	1	1	0	1	0	1
1	1	1	1	1	1	0	1	0	1
1	1	1	1	1	1	0	1	0	1
1	1	1	1	1	1	0	1	0	1
1	1	1	1	1	1	0	1	0	1
1	1	1	1	1	1	0	1	0	1
1	1	1	1	1	1	0	1	0	1
1	1	1	1	1	1	0	1	0	1
1	1	1	1	1	1	0	1	0	1
1	1	1	1	1	1	0	1	0	1
1	1	1	1	1	1	0	1	0	1
1	1	1	1	1	1	0	1	0	1
1	1	1	1	1	1	0	1	0	1
1	1	1	1	1	1	0	1	0	1
1	1	1	1	1	1	0	1	0	1
1	1	1	1	1	1	0	1	0	1
1	1	1	1	1	1	0	1	0	1
1	1	1	1	1	1	0	1	0	1
1	1	1	1	1	1	0	1	0	1
1	1	1	1	1	1	0	1	0	1
1	1	1	1	1	1	0	1	0	1
1	1	1	1	1	1	0	1	0	1
1	1	1	1	1	1	0	1	0	1
1	1	1	1	1	1	0	1	0	1
1	1	1	1	1	1	0	1	0	1
1	1	1	1	1	1	0	1	0	1
1	1	1	1	1	1	0	1	0	1
1	1	1	1	1	1	0	1	0	1
1	1	1	1	1	1	0	1	0	1
1	1	1	1	1	1	0	1	0	1
1	1	1	1	1	1	0	1	0	1
1	1	1	1	1	1	0	1	0	1
1	1	1	1	1	1	0	1	0	1
1	1	1	1	1	1	0	1	0	1
1	1	1	1	1	1	0	1	0	1
1	1	1	1	1	1	0	1	0	1
1	1	1	1	1	1	0	1	0	1
1	1	1	1	1	1	0	1	0	1
1	1	1	1	1	1	0	1	0	1
1	1	1	1	1	1	0	1	0	1
1	1	1	1	1	1	0	1	0	1
1	1	1	1	1	1	0	1	0	1
1	1	1	1	1	1	0	1	0	1
1	1	1	1	1	1	0	1	0	1
1	1	1	1	1	1	0	1	0	1
1	1	1	1	1	1	0	1	0	1
1	1	1	1	1	1	0	1	0	1
1	1	1	1	1	1	0	1	0	1
1	1	1	1	1	1	0	1	0	1
1	1	1	1	1	1	0	1	0	1
1	1	1	1	1	1	0	1	0	1
1	1	1	1	1	1	0	1	0	1
1	1	1	1	1	1	0	1	0	1
1	1	1	1	1	1	0	1	0	1
1	1	1	1	1	1	0	1	0	1
1	1	1	1	1	1	0	1	0	1
1	1	1	1	1	1	0	1	0	1
1	1	1	1	1	1	0	1	0	1
1	1	1	1	1	1	0	1	0	1
1	1	1	1	1	1	0	1	0	1
1	1	1	1	1	1	0	1	0	1
1	1	1	1	1	1	0	1	0	1
1	1	1	1	1	1	0	1	0	1
1	1	1	1	1	1	0	1	0	1
1	1	1	1	1	1	0	1	0	1
1	1	1	1	1	1	0	1	0	1
1	1	1	1	1	1	0	1	0	1
1	1	1	1	1	1	0	1	0	1
1	1	1	1	1	1	0	1	0	1
1	1	1	1	1	1	0	1	0	1
1	1	1	1	1	1	0	1	0	1
1	1	1	1	1	1	0	1	0	1
1	1	1	1	1	1	0	1	0	1
1	1	1	1	1	1	0	1	0	1
1	1	1	1	1	1	0	1	0	1
1	1	1	1	1	1	0	1	0	1
1	1	1	1	1	1	0	1	0	1
1	1	1	1	1	1	0	1	0	1
1	1	1	1	1	1	0	1	0	1
1	1	1	1	1	1	0	1	0	1
1	1	1	1	1	1	0	1	0	1
1	1	1	1	1	1	0	1	0	1
1	1	1	1	1	1	0	1	0	1
1	1	1	1	1	1	0	1	0	1
1	1	1	1	1	1	0	1	0	1
1	1	1	1	1	1	0	1	0	1
1	1	1	1	1	1	0	1	0	1
1	1	1	1	1	1	0	1	0	1
1	1	1	1	1	1	0	1	0	1
1	1	1	1	1	1	0	1	0	1
1	1	1	1	1	1	0	1	0	1
1	1	1	1	1	1	0	1	0	1
1	1	1	1	1	1	0	1	0	1
1	1	1	1	1	1	0	1	0	1
1	1	1	1	1	1	0	1	0	1
1	1	1	1	1	1	0	1	0	1
1	1	1	1	1	1	0	1	0	1
1	1	1	1	1	1	0	1	0	1
1	1	1	1	1	1	0	1	0	1
1	1	1	1	1	1	0	1	0	1
1	1	1	1	1	1	0	1	0	1
1	1	1	1	1	1	0	1	0	1
1	1	1	1	1	1	0	1	0	1
1	1	1	1	1	1	0	1	0	1
1	1	1	1	1	1	0	1	0	1
1	1	1	1	1	1	0	1	0	1
1	1	1	1	1	1	0	1	0	1
1	1	1	1	1	1	0	1	0	1
1	1	1	1	1	1	0	1	0	1
1	1	1	1	1	1	0	1	0	1
1	1	1	1	1	1	0	1	0	1
1	1	1	1	1	1	0	1	0	1
1	1	1	1	1	1	0	1	0	1
1	1	1	1	1	1	0	1	0	1
1	1	1	1	1	1	0	1	0	1
1	1	1	1	1	1	0	1	0	1
1	1	1	1	1	1	0	1	0	1
1	1	1	1	1	1	0	1	0	1
1	1	1	1	1	1	0	1	0	1
1	1	1	1	1	1	0	1	0	1
1	1	1	1	1	1	0	1	0	1
1	1	1	1	1	1	0	1	0	1
1	1	1	1	1	1	0	1	0	1
1	1	1	1	1	1	0	1	0	1
1	1	1	1	1	1	0	1	0	1
1	1	1	1	1	1	0	1	0	1
1	1	1	1	1	1	0	1	0	1
1	1	1	1	1	1	0	1	0	1
1	1	1	1	1	1	0	1	0	1
1	1	1	1	1	1	0	1	0	1
1	1	1	1	1	1	0	1	0	1
1	1	1	1	1	1	0	1	0	1
1	1	1	1	1	1	0	1	0	1
1	1	1	1	1	1	0	1	0	1
1	1	1	1	1	1	0	1	0	1
1	1	1	1	1	1	0	1	0	1
1	1	1	1	1	1	0	1	0	1
1	1	1	1	1	1	0	1	0	1
1	1	1	1	1	1	0	1	0	1
1	1	1	1	1	1	0	1	0	1
1	1	1	1	1	1	0	1	0	1
1	1	1	1	1	1	0	1	0	1
1	1	1	1	1	1	0	1	0	1
1	1	1	1	1	1	0	1	0	1
1	1	1	1	1	1	0	1	0	1
1	1	1	1	1	1	0	1	0	1
1	1	1	1	1	1	0	1	0	1
1	1	1	1	1	1	0	1	0	1
1	1	1	1	1	1	0	1	0	1
1	1	1	1	1	1	0	1	0	1
1	1	1	1	1	1	0	1	0	1
1	1	1	1	1	1	0	1	0	1
1	1	1	1	1	1	0	1	0	1
1	1	1	1	1	1	0	1	0	1
1	1	1	1	1	1	0	1	0	1
1	1	1	1	1	1	1	1	0	1
1	1	1	1	1	1	0	1	0	1
1	1	1	1	1	1	0	1	0	1
1	1	1	1	1	1	0	1	0	1
1	1	1	1	1	1	0	1	0	1
1	1	1	1	1	1	0	1	0	1
1	1	1	1	1	1	0	1	0	1
1	1	1	1	1	1	0	1	0	1
1	1	1	1	1	1	0	1	0	1
1	1	1	1	1	1	1	1	0	1
1	1	1	1	1	1	1	1	0	1
1	1	1	1	1	1	0	1	0	1
1	1	1	1	1	1	0	1	0	1
1	1	1	1	1	1	0	1	0	1
1	1	1	1	1	1	0	1	0	1
1	1	1	1	1	1	0	1	0	1
1	1	1	1	1	1	0	1	0	1
1	1	1	1	1	1	1	1	0	1
1	1	1	1	1	1	0	1	0	1
1	1	1	1	1	1	1	1	0	1
1	1	1	1	1	1	1	1	0	1
1	1	1	1	1	1	0	1	0	1
1	1	1	1	1	1	1	1	0	1
1	1	1	1	1	1	1	1	0	1
1	1	1	1	1	1	1	1	0	1
1	1	1	1	1	1	0	1	0	1
1	1	1	1	1	1	0	1	0	1
1	1	1	1	1	1	1	1	0	1
1	1	1	1	1	1	1	1	0	1
1	1	1	1	1	1	1	1	0	1
1	1	1	1	1	1	1	1	0	1
1	1	1	1	1	1	1	1	0	1
1	1	1	1	1	1	1	1	0	1
1	1	1	1	1	1	1	1	0	1
1	1	1	1	1	1	1	1	0	1
1	1	1	1	1	1	1	1	0	1
1	1	1	1	1	1	1	1	0	1
1	1	1	1	1	1	1	1	0	1
1	1	1	1	1	1	1	1	0	1
1	1	1	1	1	1	1	1	0	1
1	1	1	1	1	1	1	1	0	1
1	1	1	1	1	1	1	1	0	1
1	1	1	1	1	1	1	1	0	1
1	1	1	1	1	1	1	1	0	1
1	1	1	1	1	1	1	1	0	1
1	1	1	1	1	1	1	1	0	1
1	1	1	1	1	1	1	1	0	1
1	1	1	1	1	1	1	1	0	1
1	1	1	1	1	1	1	1	0	1
1	1	1	1	1	1	1	1	0	1
1	1	1	1	1	1	1	1	0	1
1	1	1	1	1	1	1	1	0	1
1	1	1	1	1	1	1	1	0	1
1	1	1	1	1	1	1	1	0	1
1	1	1	1	1	1	1	1	0	1
1	1	1	1	1	1	1	1	0	1
1	1	1	1	1	1	1	1	0	1
1	1	1	1	1	1	1	1	0	1
1	1	1	1	1	1	1	1	0	1
1	1	1	1	1	1	1	1	0	1
1	1	1	1	1	1	1	1	0	1
1	1	1	1	1	1	1	1	0	1
1	1	1	1	1	1	1	1	0	1
1	1	1	1	1	1	1	1	0	1
1	1	1	1	1	1	1	1	0	1
1	1	1	1	1	1	1	1	0	1
1	1	1	1	1	1	1	1	0	1
1	1	1	1	1	1	1	1	0	1
1	1	1	1	1	1	1	1	0	1
1	1	1	1	1	1	1	1	0	1
1	1	1	1	1	1	1	1	0	1
1	1	1	1	1	1	1	1	0	1
1	1	1	1	1	1	1	1	0	1
1	1	1	1	1	1	1	1	0	1
1	1	1	1	1	1	1	1	0	1
1	1	1	1	1	1	1	1	0	1
1	1	1	1	1	1	1	1	0	1
1	1	1	1	1	1	1	1	0	1
1	1	1	1	1	1	1	1	0	1
1	1	1	1	1	1	1	1	0	1
1	1	1	1	1	1	1	1	0	1
1	1	1	1	1	1	1	1	0	1
1	1	1	1	1	1	1	1	0	1
1	1	1	1	1	1	1	1	0	1
1	1	1	1	1	1	1	1	0	1
1	1	1	1	1	1	1	1	0	1
1	1	1	1	1	1	1	1	0	1
1	1	1	1	1	1	1	1	0	1
1	1	1	1	1	1	1	1	0	1
1	1	1	1	1	1	1	1	0	1
1	1	1	1	1	1	1	1	0	1
1	1	1	1	1	1	1	1	0	1
1	1	1	1	1	1	1	1	0	1
1	1	1	1	1	1	1	1	0	1
1	1	1	1	1	1	1	1	0	1
1	1	1	1	1	1	1	1	0	1
1	1	1	1	1	1	1	1	0	1
1	1	1	1	1	1	1	1	0	1
1	1	1	1	1	1	1	1	0	1
1	1	1	1	1	1	1	1	0	1
1	1	1	1	1	1	1	1	0	1
1	1	1	1	1	1	1	1	0	1
1	1	1	1	1	1	1	1	0	1
1	1	1	1	1	1	1	1	0	1
1	1	1	1	1	1	1	1	0	1
1	1	1	1	1	1	1	1	0	1
1	1	1	1	1	1	1	1	0	1
1	1	1	1	1	1	1	1	0	1
1	1	1	1	1	1	1	1	0	1
1	1	1	1	1	1	1	1	0	1
1	1	1	1	1	1	1	1	0	1
1	1	1	1	1	1	1	1	0	1
1	1	1	1	1	1	1	1	0	1
1	1	1	1	1	1	1	1	0	1
1	1	1	1	1	1	1	1	0	1
1	1	1	1	1	1	1	1	0	1
1	1	1	1	1	1	1	1	0	1
1	1	1	1	1	1	1	1	0	1
1	1	1	1	1	1	1	1	0	1
1	1	1	1	1	1	1	1	0	1
1	1	1	1	1	1	1	1	0	1
1	1	1	1	1	1	1	1	0	1
1	1	1	1	1	1	1	1	0	1
1	1	1	1	1	1	1	1	0	1
1	1	1	1	1	1	1	1	0	1
1	1	1	1	1	1	1	1	0	1
1	1	1	1	1	1	1	1	0	1
1	1	1	1	1	1	1	1	0	1
1	1	1	1	1	1	1	1	0	1
1	1	1	1	1	1	1	1	0	1
1	1	1	1	1	1	1	1	0	1
1	1	1	1	1	1	1	1	0	1
1	1	1	1	1	1	1	1	0	1
1	1	1	1	1	1	1	1	0	1
1	1	1	1	1	1	1	1	0	1
1	1	1	1	1	1	1	1	0	1
1	1	1	1	1	1	1	1	0	1
1	1	1	1	1	1	1	1	0	1
1	1	1	1	1	1	1	1	0	1
1	1	1	1	1	1	1	1	0	1
1	1	1	1	1	1	1	1	0	1
1	1	1	1	1	1	1	1	0	1
1	1	1	1	1	1	1	1	0	1
1	1	1	1	1	1	1	1	0	1
1	1	1	1	1	1	1	1	0	1
1	1	1	1	1	1	1	1	0	1
1	1	1	1	1	1	1	1	0	1
1	1	1	1	1	1	1	1	0	1
1	1	1	1	1	1	1	1	0	1
1	1	1	1	1	1	1	1	0	1
1	1	1	1	1	1	1	1	0	1
1	1	1	1	1	1	1	1	0	1
1	1	1	1	1	1	1	1	0	1

## Sheet: hrl
0	0	0	0	0	0	0	0	0	0
0	0	0	0	0	0	0	0	0	0
0	0	0	0	0	0	0	0	0	0
0	0	0	0	0	0	0	0	0	0
0	0	0	0	0	0	0	0	0	0
0	0	0	0	0	0	0	0	0	0
0	0	0	0	0	0	0	0	0	0
0	0	0	0	0	0	0	0	0	0
0	0	0	0	0	0	0	0	0	0
0	0	0	0	0	0	0	0	0	0
0	0	0	0	0	0	0	0	1	0
0	0	0	0	0	0	0	0	0	0
0	0	0	0	0	0	0	0	0	0
0	0	0	0	0	0	0	0	0	0
0	0	0	0	0	0	0	0	0	0
0	0	1	1	0	0	0	0	0	0
0	0	0	0	0	0	0	0	0	0
0	0	0	0	0	0	0	0	0	0
0	0	0	0	0	0	1	0	0	0
0	0	0	0	0	0	0	0	1	0
0	0	0	0	0	0	0	0	0	0
0	0	0	0	0	0	0	0	0	0
0	0	0	0	0	0	0	0	0	0
0	0	0	0	0	0	0	0	0	0
0	0	0	0	0	0	0	0	0	0
1	0	0	0	0	0	0	0	0	0
0	0	0	0	0	0	0	0	0	0
0	0	0	0	0	0	0	0	0	0
0	1	0	1	0	1	0	0	0	0
0	0	1	0	1	0	1	0	0	0
0	0	0	0	0	0	1	0	0	0
0	0	0	0	0	0	0	0	1	0
0	0	0	0	0	0	0	0	0	0
0	0	0	0	0	0	0	0	0	0
0	0	0	0	0	0	0	0	0	0
0	0	0	1	0	0	0	0	0	0
0	1	1	0	0	0	0	0	0	0
0	0	0	0	0	0	0	0	0	0
0	0	1	0	0	0	0	0	1	0
0	0	0	0	0	0	1	0	1	0
1	0	1	0	0	0	0	0	0	0
0	0	0	0	0	0	0	0	0	0
0	0	0	0	0	0	1	0	0	1
0	0	0	0	0	0	0	0	0	0
0	0	0	0	0	0	0	0	0	0
0	0	0	1	0	0	0	0	1	0
1	0	1	0	0	0	0	1	0	0
0	1	0	0	0	0	0	0	0	1
1	0	1	0	0	0	0	0	0	0
1	0	0	0	0	0	0	0	0	1
0	0	0	0	0	0	1	0	0	0
0	0	0	0	0	1	0	0	0	0
0	0	0	0	0	1	0	0	0	0
0	0	1	0	0	0	1	1	0	0
0	0	1	0	0	1	0	1	0	0
0	0	0	0	0	0	0	0	0	0
0	0	1	0	0	0	1	0	1	1
0	0	0	0	1	0	0	0	0	1
0	0	0	0	0	0	0	0	1	0
0	0	1	0	0	0	0	0	0	0
0	0	0	1	0	0	0	0	0	0
0	0	0	1	0	0	1	0	0	0
0	1	0	1	0	0	0	1	0	0
0	1	0	0	1	0	0	0	0	0
0	0	0	0	0	0	0	0	0	0
0	0	0	0	0	0	0	0	0	1
0	0	0	0	0	0	0	0	0	0
0	1	0	0	0	0	0	1	0	1
0	1	0	0	1	0	0	0	0	0
0	1	0	0	0	0	1	0	0	1
0	0	1	0	0	1	0	0	1	1
0	0	1	0	0	0	0	1	0	1
1	1	0	0	0	0	0	1	0	1
0	1	0	0	0	0	0	0	1	0
0	0	0	0	0	0	1	0	0	1
0	0	1	0	0	0	0	0	0	1
0	1	0	0	0	0	1	0	1	0
0	0	0	0	0	0	0	0	0	0
0	0	0	0	0	0	0	0	1	0
0	0	0	0	0	1	0	0	0	0
0	1	0	0	0	0	0	0	0	0
0	0	0	0	0	1	0	0	0	1
0	0	0	0	0	0	0	1	0	0
0	0	1	0	0	0	1	0	0	0
0	0	1	0	0	1	0	0	0	0
0	1	0	0	0	1	0	0	0	0
1	0	0	0	0	0	0	0	0	0
0	0	0	0	0	0	0	0	0	1
1	0	0	0	0	0	0	1	0	0
0	0	1	1	0	0	0	1	0	1
0	0	0	1	0	1	1	1	0	0
0	0	0	0	0	0	0	0	0	0
0	0	0	1	0	0	0	1	0	0
1	0	0	0	0	0	0	0	0	0
1	1	0	0	1	0	0	0	0	0
0	0	0	1	0	0	0	0	1	0
0	0	0	0	0	0	0	1	0	0
0	0	0	0	0	0	0	1	1	1
0	0	0	0	0	0	0	1	0	0
0	0	0	0	0	0	0	0	0	0
0	0	1	0	1	0	0	0	0	0
0	1	1	0	0	0	0	0	0	0
1	1	0	0	0	0	0	0	0	0
0	0	0	0	0	0	0	1	0	0
0	0	0	0	1	1	0	0	0	1
0	0	0	0	0	1	0	1	0	1
0	0	1	0	1	0	0	0	0	0
0	1	1	0	0	0	0	0	0	0
0	0	1	0	0	0	0	0	0	1
0	0	0	0	1	0	1	0	0	0
1	0	0	0	1	0	0	0	0	0
0	0	0	1	0	0	0	1	0	0
0	0	0	0	0	0	0	1	0	0
0	0	0	0	0	0	1	1	0	0
0	0	0	0	0	0	1	1	0	0
0	0	1	0	0	0	0	0	0	0
1	0	0	0	0	0	0	0	0	0
0	0	0	0	0	0	0	0	1	0
0	0	0	0	1	1	1	0	0	1
0	0	1	0	1	0	0	0	1	1
0	1	0	1	0	0	0	1	0	0
1	0	1	0	0	0	0	1	0	0
1	0	0	0	0	0	0	1	0	1
0	0	1	1	1	0	0	0	0	0
0	0	0	0	0	0	0	0	1	0
0	0	0	1	0	0	0	0	0	0
0	0	0	0	0	0	1	0	0	1
0	0	0	0	0	0	0	0	0	0
0	1	1	0	0	0	0	0	0	0
0	1	0	1	0	0	0	0	1	0
1	0	0	0	0	0	0	0	0	1
0	0	0	0	1	0	0	0	0	0
0	0	0	0	1	0	0	0	0	1
0	1	0	0	0	0	1	0	1	0
0	0	0	1	0	1	0	0	0	1
0	0	0	1	0	1	0	0	0	0
0	0	0	0	0	0	0	0	0	1
1	0	0	0	1	0	0	1	0	0
0	0	0	0	0	1	1	1	0	0
0	0	0	1	0	0	0	0	0	1
0	0	0	0	0	0	0	1	0	1
0	1	0	0	0	0	0	0	1	0
0	1	0	1	0	1	0	0	0	0
0	0	1	0	0	0	0	1	1	0
1	1	0	1	1	1	1	0	0	0
0	0	1	0	0	0	0	0	0	1
0	0	0	0	0	1	1	0	0	1
1	0	1	1	0	0	1	0	0	0
0	0	0	0	0	0	1	0	0	0
0	0	0	0	0	0	0	1	0	1
0	0	0	0	1	0	0	0	0	0
0	0	0	0	0	1	0	0	0	0
0	0	0	1	0	0	1	0	0	0
0	0	1	0	0	0	0	0	1	0
1	0	0	0	0	1	1	1	0	0
0	1	0	0	0	1	0	0	0	0
1	0	1	0	0	1	1	0	0	0
1	0	0	0	0	0	0	1	0	0
0	1	0	1	0	0	0	0	0	1
1	0	0	0	0	0	0	0	0	1
0	0	0	0	0	1	0	1	0	0
0	0	0	0	0	0	1	0	0	0
0	1	0	0	1	0	0	0	1	1
0	1	0	0	0	0	1	1	0	0
1	0	0	0	0	0	0	0	0	0
0	0	0	0	0	0	0	0	1	0
0	0	0	0	0	0	0	0	0	0
0	1	0	1	0	1	0	1	1	1
0	1	0	0	1	0	0	0	1	1
0	0	0	0	0	1	0	0	0	1
0	1	0	0	0	0	1	0	1	1
1	0	0	0	1	0	1	1	1	0
0	0	0	0	0	0	0	1	0	0
0	0	0	0	1	0	0	1	0	0
1	0	0	0	0	0	0	0	0	0
1	0	0	1	1	0	1	0	0	0
0	0	0	0	0	0	0	1	0	1
0	0	0	0	0	0	0	0	0	0
0	0	0	1	0	0	0	1	0	0
0	0	0	0	0	0	0	0	0	0
0	0	0	0	1	0	0	0	0	0
1	0	0	1	0	0	0	0	0	1
1	0	0	0	1	0	0	0	0	1
1	0	0	0	0	0	0	0	0	1
0	1	0	0	0	0	0	0	0	0
0	0	0	0	0	0	1	0	0	0
0	1	0	0	0	0	0	0	0	0
0	0	0	1	0	1	0	0	0	0
0	0	0	0	1	1	0	0	1	1
0	0	1	0	0	1	0	0	1	0
0	1	0	0	0	0	1	0	0	1
0	1	0	0	0	1	1	0	0	0
0	1	0	0	1	0	1	0	0	0
0	0	0	0	1	1	0	0	1	1
0	1	0	0	1	0	0	1	0	0
0	0	0	0	0	1	0	0	1	0
0	0	1	0	0	0	0	0	0	0
0	0	0	0	1	0	1	1	1	0
0	0	0	0	0	0	1	0	0	0
0	0	0	0	1	0	0	0	0	0
0	0	1	1	0	0	0	0	0	0
0	1	0	0	0	0	0	0	0	0
0	0	0	0	0	1	0	0	0	0
0	0	0	1	0	0	0	0	0	1
0	0	1	0	0	0	1	0	0	0
0	0	0	0	0	0	1	1	1	0
0	0	0	0	0	0	0	1	0	0
0	1	0	0	0	0	0	0	0	1
0	0	0	0	1	1	0	0	0	0
1	1	0	0	0	0	1	1	0	0
0	0	0	0	0	0	0	0	1	0
1	0	1	0	0	0	1	0	0	0
0	0	0	0	0	0	0	0	0	0
1	0	0	0	0	1	0	0	1	0
0	0	0	0	0	0	0	0	0	0
0	0	0	1	0	0	0	0	0	0
0	0	0	0	0	0	0	1	1	0
0	0	0	0	0	0	0	1	0	0
0	0	0	1	1	0	0	0	0	0
1	0	0	0	1	0	1	0	0	0
0	0	0	0	0	0	0	0	1	0
0	0	0	0	0	0	0	0	0	0
0	0	0	1	1	0	0	1	0	0
0	0	0	1	0	0	0	1	0	0
0	0	0	0	0	1	0	0	0	0
0	0	0	0	0	0	0	0	0	0
0	0	0	0	0	0	0	0	0	0
0	0	0	0	1	0	0	1	1	0
0	1	0	0	0	0	0	0	0	1
0	0	0	1	1	0	0	0	0	0
0	0	0	1	0	0	0	0	0	0
0	0	0	0	0	0	0	0	0	0
1	1	0	0	0	0	0	0	1	0
0	1	0	1	0	1	0	0	0	0
0	0	0	0	1	0	0	0	0	0
0	1	0	0	0	0	0	0	0	0
0	0	0	1	0	0	0	0	0	0
0	0	0	1	1	1	0	1	0	0
0	1	0	0	1	0	0	0	1	1
0	0	0	0	0	0	1	0	0	0
0	0	0	0	0	0	0	0	0	0
1	1	0	0	0	0	0	1	0	0
0	0	0	0	1	0	0	0	0	0
0	1	0	1	0	0	0	0	1	0
0	0	0	1	0	1	0	1	0	0
0	0	1	0	0	0	0	0	0	0
0	0	0	0	0	0	0	0	0	0
0	0	0	0	1	0	0	0	0	0
0	0	0	0	0	0	0	0	0	0
0	0	0	0	0	0	0	0	0	0
0	1	0	0	0	1	0	0	0	0
0	0	0	0	0	0	0	0	0	0
0	0	0	0	1	1	0	0	0	0
0	1	1	0	1	0	0	1	0	0
0	0	0	0	0	0	1	0	0	0
0	0	0	0	1	0	1	0	0	0
1	0	0	0	0	0	0	0	0	1
1	0	0	1	1	0	0	0	0	0
0	0	0	0	0	0	0	0	0	0
0	0	1	0	1	0	0	0	0	0
0	1	1	0	1	0	0	0	0	1
0	0	0	0	0	0	0	0	1	0
0	0	0	0	0	1	0	1	1	0
0	0	0	0	0	0	0	1	0	1
0	0	0	1	0	0	0	0	0	0
0	0	0	1	0	0	1	1	0	0
0	1	0	0	0	0	0	0	0	0
0	0	0	1	0	0	1	0	0	0
1	0	0	1	1	0	0	1	0	0
0	0	0	0	0	0	0	0	0	0
0	0	0	0	0	1	0	1	0	1
0	0	1	0	0	0	1	0	0	0
0	0	1	0	1	1	0	0	0	1
0	0	1	0	1	1	0	0	0	1
0	1	0	1	1	1	0	0	0	1
0	1	1	0	0	1	0	1	0	1
1	0	0	0	0	1	0	1	0	1
0	0	0	0	0	0	1	0	1	0
0	0	0	0	0	1	0	1	0	0
0	0	0	0	0	0	0	1	0	0
0	0	0	1	1	0	0	0	0	1
0	0	0	0	1	0	0	0	1	0
0	0	1	0	1	0	1	1	1	0
0	0	1	1	0	0	0	0	0	1
0	0	0	0	0	1	0	0	0	1
0	0	0	0	0	1	0	0	0	0
1	1	1	1	0	0	0	1	0	0
1	1	0	0	0	0	0	0	0	0
0	0	1	0	0	0	0	0	1	0
1	0	1	1	1	0	0	0	1	1
0	0	1	1	1	0	0	1	1	0
1	1	0	0	0	0	0	0	0	0
1	1	0	0	0	0	0	1	0	0
0	0	0	0	1	0	0	1	0	0
0	0	0	1	1	1	0	0	1	0
0	1	0	1	1	1	0	0	1	0
1	1	1	0	1	1	0	0	0	0
0	1	0	0	0	0	0	0	0	0
0	0	0	0	1	0	1	0	0	0
0	1	0	0	1	0	0	1	0	0
0	0	0	0	1	1	1	0	0	0
1	0	0	0	1	0	0	0	0	0
0	0	0	1	0	0	0	0	1	0
0	0	0	0	0	1	0	0	0	0
0	0	0	0	0	0	0	0	0	1
0	0	0	1	0	0	0	0	0	0
1	1	0	0	1	0	1	0	0	1
0	0	0	1	0	1	0	0	0	0
0	0	0	0	0	1	1	0	0	0
0	0	0	0	0	1	0	1	0	0
0	1	0	0	0	0	1	0	0	0
0	0	0	1	0	0	0	1	0	0
0	0	0	0	0	0	0	1	0	0
0	1	0	0	0	0	0	0	0	0
0	0	0	0	0	1	0	1	0	0
0	0	1	0	0	0	0	1	0	0
1	1	1	0	1	0	0	0	0	0
0	1	0	0	0	1	0	0	1	1
0	0	1	0	0	0	0	0	0	0
0	0	0	0	0	0	0	0	1	0
0	0	0	0	0	0	0	1	0	0
0	1	1	0	0	0	0	0	0	0
1	0	1	1	0	0	0	1	1	0
0	0	0	0	0	0	1	0	0	0
0	0	0	0	0	0	0	0	0	0
0	1	0	0	0	0	0	0	1	0
0	0	0	0	0	0	0	0	0	0
0	0	0	0	0	1	1	0	0	0
0	0	0	0	1	1	0	0	0	0
0	0	0	1	0	0	0	0	0	0
0	0	1	0	0	0	0	0	0	0
1	0	1	0	1	0	0	1	0	0
0	0	1	0	0	0	0	0	0	0
0	0	0	0	1	0	0	0	0	0
0	0	1	1	0	0	1	0	1	1
0	0	0	0	0	0	0	1	0	0
0	1	0	0	1	1	0	0	1	0
0	0	0	0	0	0	0	0	0	0
0	0	0	0	0	0	0	0	1	0
0	0	1	0	0	0	0	0	0	0
0	0	0	0	0	0	1	0	0	0
1	0	0	0	0	0	0	0	0	0
0	0	0	0	0	0	0	0	1	0
0	0	0	0	0	0	0	1	0	0
0	0	0	0	0	1	0	1	0	0
0	0	0	0	0	0	0	0	0	0
0	0	0	1	0	1	0	1	1	1
1	0	1	0	0	1	0	0	1	1
0	0	0	0	0	0	0	1	0	1
0	0	0	1	1	1	0	0	0	0
0	0	0	0	0	0	0	1	0	0
0	0	0	0	0	0	0	0	0	1
1	1	0	0	0	0	0	0	1	1
0	0	0	0	0	0	0	0	0	0
0	1	1	0	0	0	0	0	1	0
0	0	0	0	0	0	0	0	0	0
0	0	0	0	0	0	1	0	1	0
0	0	0	0	0	0	0	0	1	1
1	0	1	1	0	1	0	0	0	0
1	0	0	0	1	0	0	0	0	0
0	0	1	0	0	1	0	0	0	0
1	0	0	0	0	0	0	0	0	1
0	0	0	0	0	0	1	0	1	0
0	1	0	0	0	0	0	0	0	1
0	1	1	0	0	0	0	0	1	1
0	0	0	0	0	0	0	0	0	0
1	0	1	0	0	0	0	1	1	0
0	0	0	1	0	0	0	0	0	0
0	0	0	1	0	0	0	0	0	0
1	0	0	0	0	0	0	0	0	0
1	1	0	0	1	1	0	1	1	0
0	1	0	1	0	0	0	0	0	0
0	1	0	0	0	0	0	0	0	0
0	0	1	1	0	0	0	0	1	1
0	1	1	0	0	1	1	0	0	0
0	1	0	0	0	0	0	0	0	0
0	0	1	0	0	0	0	0	0	0
0	0	0	1	0	1	1	0	0	1
0	1	1	0	0	0	0	1	0	1
0	0	0	0	0	0	0	0	0	1
0	0	0	0	0	1	0	0	1	0
0	1	0	1	0	0	1	0	0	0
0	0	0	1	0	0	0	0	0	0
0	1	1	0	0	0	0	0	0	1
0	0	0	1	0	0	0	0	0	0
0	0	1	1	0	0	1	0	1	1
0	0	0	0	0	0	0	1	1	0
0	0	1	0	0	0	0	0	0	0
0	1	1	0	0	0	0	1	0	0
0	0	0	0	1	0	0	0	0	0
1	0	0	0	0	0	0	0	0	0
1	0	1	0	0	0	0	0	0	0
0	0	0	0	1	0	0	0	0	0
0	0	1	0	0	0	0	0	0	0
0	0	1	0	0	0	1	1	0	0
0	0	0	0	0	0	0	0	0	0
0	0	0	0	0	0	0	0	0	0
0	1	0	0	0	0	0	0	0	0
1	0	1	0	0	0	0	1	0	0
1	0	0	0	1	0	0	1	0	0
0	0	0	0	1	0	0	0	0	1
0	1	0	1	0	0	0	0	0	0
0	0	0	0	0	0	0	0	0	1
0	0	0	1	0	0	0	0	0	0
0	0	0	1	0	0	0	1	0	0
0	0	0	0	0	0	0	0	0	0
0	0	0	0	1	0	1	1	0	0
0	0	0	0	1	0	1	1	0	0
0	0	0	0	0	0	1	0	0	0
0	0	0	1	0	0	0	1	0	0
0	0	1	1	1	1	0	0	0	0
0	0	1	0	0	0	0	0	0	0
0	0	0	0	1	0	1	1	0	1
0	0	1	0	0	0	1	0	0	0
0	0	0	0	0	0	0	0	0	0
0	0	0	0	0	0	0	0	0	0
0	0	1	0	0	1	0	0	0	0
1	0	0	0	0	0	1	0	0	0
0	0	0	0	0	1	0	0	1	0
0	0	0	1	0	0	0	0	0	0
1	0	0	1	1	0	0	0	0	1
0	0	0	0	0	0	0	1	1	0
0	0	1	0	0	1	0	0	0	0
0	0	0	0	0	0	0	0	1	0
0	0	0	1	0	0	0	0	1	0
0	0	1	0	0	1	1	0	0	0
0	0	0	0	0	0	0	1	0	0
1	0	0	0	0	1	0	0	0	0
0	0	0	1	1	0	1	0	0	0
1	0	0	0	0	0	0	0	0	1
1	0	1	0	0	0	0	0	0	0
0	0	0	0	0	0	1	0	0	0
0	1	0	0	0	0	1	0	0	0
0	0	0	0	0	0	0	0	0	1
0	0	0	1	0	0	0	0	0	0
1	0	0	0	1	0	0	0	0	1
0	0	1	0	0	0	1	0	0	1
0	1	0	0	0	0	0	0	0	0
1	1	1	0	0	0	1	0	0	1
0	1	0	0	0	0	0	0	1	0
1	0	0	0	0	0	0	0	0	1
1	0	0	1	1	0	0	0	0	0
0	0	0	0	0	0	0	1	1	0
0	0	0	0	0	0	0	0	0	1
0	1	0	1	0	0	0	1	0	0
0	0	1	1	0	0	1	0	0	0
1	1	0	1	0	0	0	1	1	1
0	0	0	1	0	0	0	1	0	1
0	0	0	0	0	0	0	0	0	0
0	0	0	1	0	1	0	0	0	0
0	0	0	0	0	0	0	0	0	0
0	1	0	0	1	0	0	0	1	0
0	0	0	1	0	1	0	0	0	0
0	1	0	0	0	0	1	0	1	0
1	0	0	0	0	1	1	0	1	0
0	0	0	0	0	0	1	0	1	1
0	0	0	0	0	0	0	1	0	0
0	0	0	0	0	0	1	0	0	0
0	1	0	0	0	0	1	0	1	1
0	0	0	0	0	0	0	0	0	0
0	0	1	0	0	1	1	0	0	0
1	0	0	0	0	0	1	0	1	0
0	0	0	0	0	0	1	0	0	0
0	0	1	1	0	0	0	0	1	0
0	1	0	0	0	0	0	0	0	0
0	0	0	1	0	0	0	0	0	0
0	1	0	0	0	1	1	0	0	0
0	0	0	0	1	0	0	0	0	1
0	1	1	0	0	0	0	0	1	0
1	0	0	0	0	0	0	0	1	0
0	0	0	0	1	0	0	0	1	0
0	1	0	0	0	0	0	0	0	1
1	0	0	0	1	0	0	0	0	0
0	0	0	0	0	0	0	0	0	0
0	0	0	0	0	0	0	0	0	1
1	0	0	0	1	1	0	1	1	0
0	1	1	0	0	0	0	0	0	0
1	0	0	0	0	0	0	0	0	0
0	0	0	0	0	0	1	0	0	0
0	0	0	1	0	0	0	0	0	0
0	0	0	0	0	0	0	0	0	0
1	1	0	0	0	0	0	0	0	1
0	0	0	0	0	0	0	1	0	0
0	0	0	0	0	0	0	0	0	0
0	1	0	0	1	0	1	0	0	0
0	0	1	0	0	0	0	0	0	0
1	0	0	1	1	0	0	0	1	0
0	0	1	0	0	0	0	0	0	0
0	1	0	1	0	0	0	0	0	0
0	0	0	1	0	1	0	0	1	0
0	0	0	0	1	0	0	0	0	1
0	0	0	0	1	1	0	0	0	0
0	0	0	0	1	1	0	0	1	0
0	0	0	0	0	1	1	0	0	0
0	0	0	0	0	0	0	1	0	0
0	0	1	0	0	0	0	0	0	1
0	0	0	0	1	0	0	0	0	0
0	0	0	0	0	0	0	1	0	0
1	0	0	1	0	0	0	0	0	0
0	0	0	0	1	0	0	0	0	0
0	0	0	0	0	0	0	0	1	1
1	0	0	1	0	1	0	1	0	0
1	0	0	0	0	0	1	0	1	0
0	0	0	1	0	0	0	0	1	0
0	1	0	0	0	0	0	0	0	0
0	0	0	0	0	1	0	0	0	0
0	1	0	0	0	0	0	0	0	0
0	0	1	0	0	0	0	0	1	0
0	0	0	0	0	0	0	0	1	0
1	0	1	0	0	0	1	0	0	1
1	0	0	1	0	1	0	0	0	1
1	0	0	1	0	1	0	0	0	0
1	0	0	0	0	0	0	1	0	0
0	0	0	0	0	0	0	0	0	1
0	0	0	0	1	1	0	1	1	0
0	0	0	0	0	0	0	0	0	0
0	1	0	0	0	0	0	1	0	0
0	0	1	0	1	0	0	0	1	1
0	1	0	0	0	0	0	0	0	0
0	0	0	0	0	0	0	0	0	0
0	0	0	0	0	0	0	1	0	1
1	0	0	0	0	0	0	0	0	1
0	0	0	0	0	0	0	0	0	0
0	0	1	0	1	0	0	0	0	0
1	1	0	0	0	1	0	0	0	0
0	0	1	0	0	0	0	0	0	0
0	1	0	0	0	1	0	1	0	0
1	0	0	0	0	0	0	0	0	0
1	0	1	0	1	0	1	0	0	1
0	0	1	0	0	0	1	0	0	0
0	0	0	0	0	0	1	0	0	0
1	1	1	0	0	0	0	0	0	0
0	0	0	0	0	1	0	0	0	0
1	0	0	0	1	0	0	1	0	0
0	0	1	0	0	0	0	0	0	0
0	1	0	1	0	0	0	0	0	1
0	1	0	0	0	0	0	1	0	0
0	0	0	1	0	0	0	1	0	0
0	0	1	0	0	0	0	0	0	1
0	1	1	0	0	1	0	0	0	0
0	0	1	0	0	0	0	1	0	0
0	0	0	0	0	0	0	0	0	0
0	0	0	0	0	0	1	0	0	0
0	0	0	1	0	1	0	0	0	0
0	1	0	0	0	0	0	1	0	0
0	1	0	0	0	0	0	0	0	0
0	0	0	0	1	1	0	1	1	0
0	0	1	0	0	0	1	0	1	1
0	1	0	0	0	1	0	0	0	0
0	1	0	0	1	0	1	0	0	1
1	0	0	1	0	0	0	0	1	0
1	0	0	0	0	0	0	0	1	0
0	0	0	0	0	0	0	0	1	0
1	0	1	1	0	0	0	0	0	0
0	0	0	0	0	0	0	0	0	1
0	1	1	0	0	0	1	0	0	0
0	0	0	0	0	0	0	0	0	0
0	0	0	0	0	0	0	0	0	0
0	0	0	0	0	1	0	0	0	0
0	0	1	1	1	1	1	0	0	1
1	0	0	0	1	1	0	1	0	0
0	0	0	0	0	0	0	0	0	0
0	0	0	0	1	0	0	0	0	0
0	0	0	0	0	0	0	0	1	0
0	0	0	0	0	1	0	1	0	0
0	0	0	0	0	0	1	0	0	0
0	0	0	0	0	1	0	0	0	0
0	0	1	0	0	1	0	0	0	0
1	0	0	1	0	0	0	1	0	0
0	0	1	0	0	0	0	0	0	0
1	0	0	0	0	0	1	1	0	0
0	0	0	0	0	0	0	0	0	1
1	0	0	0	0	1	0	0	0	1
1	0	0	0	0	0	0	1	0	0
0	1	0	0	0	0	1	0	0	0
1	1	1	0	0	0	0	1	0	0
0	0	0	0	0	0	0	1	1	0
0	1	0	0	0	1	0	0	0	0
0	1	0	0	1	0	1	0	0	0
1	0	1	1	0	1	0	0	0	1
0	1	1	0	0	0	0	0	0	0
0	0	1	1	1	0	0	1	0	0
1	0	0	0	0	0	1	0	0	1
0	0	0	0	0	0	1	0	1	1
0	0	0	0	0	0	0	0	0	0
1	0	0	0	1	0	0	0	0	0
0	1	0	0	0	0	1	1	0	0
0	1	1	0	0	0	0	0	0	1
0	0	1	0	0	0	0	0	0	0
0	0	0	0	0	0	0	1	0	0
0	0	0	0	0	1	1	1	0	0
0	0	0	0	1	0	0	0	0	0
0	0	0	0	0	0	0	0	0	0
0	1	0	0	0	0	1	1	0	0
0	0	0	0	0	0	0	0	1	0
0	0	0	0	0	0	0	0	1	0
0	1	1	0	0	0	1	0	1	0
1	0	0	0	0	0	0	1	0	0
0	0	0	0	0	1	0	0	0	0
1	1	0	0	0	0	0	0	1	1
0	0	0	1	1	0	0	0	0	0
0	1	0	0	1	0	0	0	1	0
0	1	0	0	0	0	0	0	0	0
0	0	0	1	0	0	0	1	0	0
0	0	1	0	0	0	0	0	0	0
1	0	0	0	1	0	0	0	0	0
1	1	0	0	0	0	0	1	0	0
0	0	0	0	0	0	0	0	0	0
1	0	1	0	1	0	0	0	1	0
0	0	1	0	1	0	0	0	1	0
0	0	0	0	0	0	0	1	0	0
0	1	0	0	1	0	0	0	0	0
0	0	0	0	0	0	0	0	0	1
0	0	0	0	1	0	1	0	1	0
0	1	1	0	0	0	0	0	0	1
0	0	0	1	0	0	0	0	0	0
1	1	0	0	1	0	0	0	0	0
0	0	0	0	0	0	0	0	0	0
0	0	0	0	1	0	0	0	0	0
0	1	0	0	1	1	0	0	0	1
1	1	0	0	0	0	0	1	0	1
0	1	0	0	0	0	1	0	0	0
0	0	1	1	0	0	0	0	1	1
0	0	0	0	0	0	0	1	0	0
1	1	0	0	0	0	0	0	0	0
0	0	0	0	0	0	0	0	0	0
0	0	0	0	0	0	0	1	0	0
0	0	0	1	0	0	1	0	1	1
0	0	1	0	0	0	0	0	0	0
0	0	0	1	0	0	0	1	0	1
0	0	0	0	0	0	1	0	1	0
0	1	0	0	0	0	1	0	1	0
0	1	0	0	0	0	0	0	0	0
0	0	0	0	0	0	0	0	1	0
0	0	0	0	1	1	0	0	0	0
0	0	1	0	0	0	1	0	0	0
0	1	0	0	1	0	0	1	0	0
0	0	0	0	1	1	0	0	0	1
0	0	0	1	0	0	0	0	0	0
0	1	0	0	1	0	0	0	0	0
0	1	0	0	1	0	1	0	0	1
0	1	1	0	0	0	1	0	0	1
0	0	0	0	0	0	1	0	0	0
0	1	0	0	0	1	1	0	0	1
1	1	0	0	0	0	0	1	0	0
0	0	0	1	0	0	0	0	0	0
0	1	1	0	0	0	0	0	0	0
0	1	1	0	0	0	0	0	1	0
1	0	0	1	1	0	0	0	1	0
0	0	0	1	1	0	1	0	1	1
0	0	0	0	0	0	0	0	0	0
0	1	1	0	0	0	0	0	1	0
0	1	0	0	0	0	0	0	0	1
0	1	0	0	0	0	0	0	0	1
1	0	0	1	0	0	1	0	0	0
0	0	0	0	0	0	0	0	0	0
0	1	0	0	0	0	0	0	1	1
0	0	0	0	1	0	0	0	1	1
0	0	0	0	0	0	1	0	0	0
0	0	1	0	0	1	0	1	0	0
0	0	0	1	0	0	1	0	0	0
0	0	0	1	0	0	0	0	0	0
0	0	0	0	1	0	0	0	1	0
0	0	0	0	0	0	0	0	0	0
0	0	0	0	0	0	0	0	0	0
0	0	0	0	0	0	1	0	0	0
1	1	0	0	0	0	0	1	1	0
0	1	0	1	0	1	1	1	0	0
0	0	0	1	0	0	0	0	0	1
0	0	1	0	0	1	0	0	0	0
0	0	0	0	1	0	0	0	0	0
1	0	1	0	0	0	1	0	0	0
0	0	0	0	0	0	0	0	0	0
0	1	0	0	0	0	0	0	0	0
0	0	0	1	0	0	0	0	0	1
0	0	1	0	0	0	0	0	0	0
1	0	0	1	0	0	1	0	1	0
0	1	0	0	0	0	1	0	0	0
0	0	0	0	1	0	0	1	1	0
1	0	0	0	1	0	0	0	1	0
0	1	0	0	0	0	0	1	0	0
1	0	1	0	0	0	0	0	0	0
0	0	0	0	0	0	0	0	1	0
0	0	1	0	0	0	0	1	0	0
0	0	0	0	1	0	1	0	0	0
1	0	0	0	1	0	0	0	0	0
0	0	0	0	0	0	0	0	1	0
0	0	0	0	1	0	0	0	0	0
0	0	1	0	0	1	0	0	1	0
0	0	0	0	1	0	1	0	1	0
0	0	0	0	1	0	0	0	0	1
0	1	1	0	1	0	1	0	0	0
0	1	1	0	1	0	1	0	0	0
1	1	1	0	1	1	1	1	1	0
0	0	1	0	0	0	0	1	0	1
1	0	0	0	1	1	0	0	0	0
0	0	1	0	0	0	1	0	1	0
0	0	1	1	0	0	1	0	1	0
0	0	1	0	0	0	1	0	0	0
1	0	0	0	0	0	1	1	0	1
0	0	0	0	0	0	0	0	0	0
1	0	0	0	0	0	0	0	0	0
0	0	1	0	0	0	0	0	0	0
1	0	0	0	0	0	0	1	0	0
0	0	0	0	1	0	0	0	0	0
0	0	0	0	0	1	1	0	0	0
0	0	0	0	0	0	0	1	0	0
0	0	0	1	0	1	1	0	0	0
0	0	0	0	0	0	0	0	1	0
0	0	0	0	1	1	0	0	1	1
0	0	0	0	0	0	0	0	0	0
0	0	0	1	0	1	0	0	0	0
1	0	0	1	1	1	0	0	1	0
0	0	0	0	1	0	1	0	0	0
0	0	1	0	0	0	0	0	0	0
0	0	0	0	0	0	0	1	0	0
0	0	0	0	1	0	0	0	0	0
0	0	1	0	0	0	0	0	0	0
0	0	0	1	1	0	0	0	0	0
0	0	0	0	0	1	0	0	0	0
0	0	0	0	0	1	0	0	0	0
0	1	1	0	0	0	0	0	0	1
0	0	0	1	0	0	0	0	0	0
0	0	0	0	0	0	0	0	0	0
0	0	0	0	0	0	0	0	1	0
0	0	1	1	0	1	0	0	0	0
0	0	1	0	0	0	1	0	0	0
0	0	0	1	1	0	0	0	0	0
0	0	0	0	1	0	0	0	0	0
0	1	0	0	1	0	0	0	1	0
0	1	0	1	0	0	0	0	0	0
0	1	0	0	0	0	0	1	1	0
0	0	0	1	0	1	0	0	0	0
0	0	1	0	0	0	0	1	1	0
0	1	0	0	0	0	0	0	1	0
0	0	0	0	0	0	1	0	0	0
0	0	0	0	0	0	0	0	0	0
0	0	0	0	0	1	0	0	1	0
0	0	0	1	0	1	1	1	0	0
1	0	0	0	1	0	0	0	0	0
0	0	0	0	0	0	0	0	0	0
1	0	0	0	0	0	0	1	0	0
0	0	0	0	0	0	0	0	0	0
0	0	0	1	1	0	0	1	0	1
1	0	0	0	0	0	0	1	0	0
1	0	0	0	0	1	1	0	0	1
0	1	1	0	0	0	0	0	1	1
1	0	0	0	1	0	0	0	0	0
0	0	0	0	0	0	0	0	0	0
0	1	0	0	0	0	1	0	0	0
0	1	0	1	0	0	0	0	0	0
0	0	0	0	0	0	0	0	0	1
0	1	0	0	0	0	1	0	1	1
0	1	0	0	0	0	0	0	1	0
0	1	0	0	0	1	0	0	0	0
0	0	0	1	0	0	1	0	0	0
0	0	1	0	1	0	0	0	0	0
0	0	0	0	1	1	1	0	1	0
1	0	0	0	0	0	0	0	0	0
0	0	0	0	0	0	0	0	0	0
0	0	0	0	0	0	0	0	0	0
0	1	0	0	0	1	0	0	1	0
0	1	0	0	0	0	0	0	0	0
0	1	0	0	0	0	0	0	0	0
0	1	0	1	0	1	0	0	0	0
0	0	0	1	1	1	0	0	0	0
0	0	0	1	0	0	0	0	0	1
0	0	0	1	0	1	0	0	1	1
1	1	0	0	0	0	0	0	0	0
0	0	0	1	0	0	0	1	1	1
0	0	0	0	0	0	1	0	0	0
0	0	0	0	1	0	0	0	0	0
0	0	0	0	0	1	0	0	0	0
0	0	1	0	0	0	1	1	0	0
1	1	0	0	0	0	0	0	0	0
0	1	0	0	1	0	0	0	1	0
0	0	0	0	0	1	1	1	0	0
0	1	1	1	0	1	1	1	0	1
0	0	0	1	0	0	0	0	0	0
1	0	0	1	0	0	0	1	0	0
1	0	0	0	1	0	0	1	1	0
0	0	0	1	0	0	1	1	0	0
0	0	1	0	0	0	0	0	0	0
1	0	1	0	0	1	0	0	0	0
1	0	0	0	0	0	1	0	0	0
1	0	0	1	0	1	0	0	0	0
0	0	0	1	0	0	0	1	0	0
0	0	0	1	0	0	0	0	0	0
0	0	0	0	0	0	0	0	0	0
1	1	0	0	0	1	1	0	0	0
0	0	0	0	0	0	0	0	1	1
1	0	1	0	0	1	0	0	0	0
0	1	0	0	0	0	0	0	0	1
1	0	0	1	0	0	0	0	0	0
0	0	0	0	0	0	0	0	1	0
0	0	0	0	1	1	0	0	0	0
0	0	0	0	0	1	0	0	0	0
0	1	1	0	0	0	0	0	0	0
1	1	0	0	0	1	0	0	1	0
0	0	0	0	1	0	1	0	1	0
0	0	1	0	0	0	0	0	0	0
0	1	0	1	0	0	1	0	0	0
0	0	0	0	1	1	0	0	0	0
0	0	1	0	0	1	1	0	1	1
0	0	0	0	0	0	0	0	0	0
0	0	0	0	0	1	0	0	0	0
0	0	1	0	0	1	0	1	1	1
0	0	0	0	1	0	0	0	0	0
1	0	0	0	0	0	0	0	0	0
0	0	0	1	0	1	0	1	0	1
1	0	0	1	0	1	1	0	0	0
0	0	0	0	0	1	0	0	0	0
0	1	0	0	0	0	1	0	0	0
0	0	0	0	0	0	0	1	1	0
0	1	0	0	0	0	0	1	0	0
0	0	0	1	0	0	0	0	0	0
0	1	0	0	0	0	1	1	0	0
0	0	1	1	1	0	0	0	0	0
0	0	0	0	0	0	1	0	0	0
0	0	0	0	0	0	0	0	0	0
0	0	0	0	0	0	1	1	0	0
0	0	0	0	1	0	1	0	1	1
0	1	0	1	0	0	0	0	0	0
0	0	0	1	1	0	0	0	0	0
1	0	0	1	0	0	1	0	0	0
0	0	0	0	0	1	0	0	0	0
0	0	0	1	0	0	0	1	1	0
1	0	0	1	0	1	0	0	0	0
1	0	0	1	0	0	0	1	1	0
0	0	0	1	0	1	0	0	0	0
1	1	1	0	0	0	0	0	0	1
1	0	1	0	0	0	0	1	0	0
0	0	0	1	0	1	1	0	1	0
0	0	0	0	0	0	1	0	1	1
0	1	0	1	1	0	1	0	0	0
0	1	0	0	0	1	1	1	0	0
0	0	1	0	0	0	1	1	0	0
0	0	0	1	0	1	1	0	1	0
1	1	0	1	0	0	0	0	0	0
0	1	0	1	0	1	0	0	0	0
0	0	1	1	0	0	1	0	0	0
0	0	0	0	0	0	0	0	0	1
1	0	0	1	0	0	0	0	0	0
1	1	0	0	0	0	0	0	1	0
1	1	0	0	0	0	0	0	0	0
1	0	0	1	0	0	0	0	0	0
0	0	0	0	0	0	0	0	0	0
1	0	0	0	0	1	0	1	0	1
0	1	0	0	0	0	0	0	1	0
0	0	0	1	0	0	0	0	0	0
0	0	0	0	1	1	0	0	0	1
0	0	0	0	0	0	0	0	0	0
0	0	0	1	1	0	0	1	0	0
0	0	0	1	0	0	0	0	0	0
1	0	0	0	0	1	1	0	0	0
1	0	0	1	0	0	1	1	1	0
0	1	0	1	1	0	0	1	0	0
1	0	0	0	0	1	1	0	0	0
0	0	1	0	0	0	1	0	0	1
0	1	0	1	0	1	0	0	1	0
0	0	0	0	0	0	1	0	0	0
0	1	0	0	0	0	0	0	0	1
0	0	1	1	1	0	0	0	1	0
0	0	0	0	0	0	0	0	0	1
0	0	0	0	0	0	1	0	0	0
1	0	1	0	1	0	0	0	0	0
0	0	0	1	0	0	0	0	0	1
0	1	0	1	0	1	0	0	0	0
0	0	0	0	0	0	0	0	1	0
0	1	0	0	0	1	0	0	0	0
1	1	0	0	0	1	0	0	0	0
0	0	0	1	1	0	0	0	0	0
0	1	0	1	1	0	1	1	0	0
0	1	0	0	0	0	0	1	0	0
0	0	0	0	1	0	1	0	0	0
0	0	0	0	0	0	1	0	0	0
0	0	0	1	1	0	0	0	0	0
1	0	0	1	0	1	0	0	0	0
0	1	0	0	0	1	0	0	0	0
0	0	0	0	0	0	0	1	1	0
0	1	0	1	0	0	0	0	1	0
0	0	0	0	0	0	0	0	0	0
1	1	0	0	0	0	0	1	0	0
0	0	0	0	0	1	0	0	0	0
0	1	0	0	1	1	1	0	0	0
1	1	0	0	1	1	1	0	0	0
0	0	1	1	0	0	0	0	0	0
0	1	1	0	0	1	0	1	0	0
0	0	0	0	0	0	0	0	0	0
0	0	0	0	0	0	0	0	0	0
0	1	0	0	1	0	0	1	0	0
0	1	1	0	0	0	0	0	0	1
0	0	1	0	0	1	1	1	0	1
0	1	0	0	1	1	0	1	0	0
0	1	0	0	1	0	0	0	0	0
0	0	0	1	1	0	1	0	1	1
0	0	0	0	0	1	0	0	1	0
1	1	0	1	0	0	1	1	0	0
0	0	1	0	0	0	0	0	1	0
0	0	0	0	0	0	0	0	0	0
0	0	0	1	0	0	0	0	1	0
0	1	0	0	0	0	0	0	0	0
0	1	0	0	1	1	0	0	0	0
0	1	1	0	0	0	0	0	1	0
1	0	0	0	0	1	1	0	0	0
0	0	1	0	0	0	1	1	1	0
1	1	0	0	0	0	0	0	0	0
0	0	0	0	1	0	0	0	1	1
0	0	0	0	1	0	0	0	0	0
0	1	1	0	0	0	0	0	1	0
0	1	0	0	0	1	0	0	1	0
0	1	0	1	1	0	1	0	0	0
0	1	0	0	0	0	1	0	1	0
0	0	1	0	0	1	1	0	0	0
0	1	0	0	0	0	1	1	0	0
0	0	0	0	0	1	1	1	1	1
1	0	0	1	0	0	0	0	0	0
0	1	0	0	1	1	1	1	0	0
0	0	0	0	0	1	0	0	0	0
0	1	1	0	0	0	1	1	1	0
0	0	0	0	0	0	0	0	0	1
1	0	1	0	1	1	0	0	0	0
0	1	0	0	1	0	0	0	0	0
0	0	0	0	0	0	0	0	0	0
0	0	0	1	0	1	0	0	1	1
0	0	0	0	0	0	0	0	0	0
0	1	0	0	0	1	0	0	0	0
0	0	0	1	0	0	0	0	0	1
0	0	0	0	0	1	0	0	0	0
0	0	0	1	0	0	0	0	0	1
0	0	0	0	0	0	0	0	0	1
0	0	0	0	0	1	0	0	0	0
0	1	0	0	0	1	0	0	0	0
0	1	0	0	1	1	1	0	0	0
0	0	0	0	1	1	0	0	1	0
0	1	0	0	0	1	0	0	0	0
0	0	0	0	0	0	1	0	0	0
0	0	1	0	1	1	0	0	0	0
0	0	0	1	1	0	1	1	0	0
0	0	0	0	0	0	1	0	0	0
0	0	0	0	0	1	0	0	0	0
0	1	0	0	1	0	0	1	1	1
0	0	0	0	0	1	0	0	0	0
0	0	1	1	0	1	0	0	0	1
0	1	0	0	1	1	1	0	0	0
0	1	1	0	0	0	0	0	0	0
0	1	0	0	0	0	1	0	0	0
0	0	0	1	0	0	1	0	0	1
1	0	0	1	1	0	0	0	0	0
0	0	0	0	0	0	0	0	0	1
0	1	0	0	0	0	1	0	0	0
0	0	0	0	1	0	0	0	1	0
0	0	0	0	1	1	0	0	0	0
0	0	0	0	1	1	1	0	0	0
0	0	0	0	0	0	1	0	0	0
0	1	0	1	1	0	0	0	0	0
0	0	0	0	1	1	1	1	0	0
0	1	0	0	0	1	0	0	1	0
0	0	0	0	1	0	0	1	0	1
0	0	1	0	0	1	0	0	0	0
0	0	0	1	0	0	1	0	0	0
0	1	0	0	1	1	0	0	0	0
1	0	1	0	0	0	1	0	0	0
0	0	0	0	0	0	1	1	0	1
0	0	1	0	0	1	1	0	0	0
0	0	0	0	0	1	0	1	0	1
0	0	1	0	1	0	1	0	1	0
1	0	0	0	1	1	1	0	0	0
0	0	0	0	0	0	1	1	0	0
0	1	1	0	0	0	1	0	0	0
1	0	0	0	1	0	0	1	0	0
0	1	0	0	0	1	0	0	0	0
0	1	0	0	0	0	1	0	0	0
0	0	0	0	1	0	1	0	1	1
0	0	0	1	0	0	1	1	1	1
0	0	1	0	0	0	0	1	1	0
0	0	0	0	0	0	0	0	1	0
0	0	0	0	0	1	0	0	0	1
0	1	0	0	0	0	0	0	0	0
1	0	0	0	0	0	1	1	0	0
0	0	0	0	1	1	1	0	1	0
0	1	0	0	0	0	0	0	0	0
0	0	0	0	0	1	1	0	0	0
0	0	0	0	0	0	0	0	0	0
0	1	0	1	0	0	1	1	0	0
0	0	0	1	0	1	0	1	0	0
0	0	0	0	0	0	0	0	0	0
0	0	0	0	1	0	1	0	0	0
1	0	0	0	0	1	1	1	0	0
1	0	0	0	0	1	0	0	0	0
0	0	0	0	0	0	1	0	0	0
0	0	0	0	0	0	0	0	0	0
0	0	0	0	0	0	0	0	0	0
0	0	0	0	0	0	0	1	0	0
0	0	0	0	0	0	1	1	0	1
1	1	1	0	0	0	1	0	0	0
0	0	0	0	0	0	1	1	0	0
0	1	0	0	0	1	1	0	0	0
0	0	1	0	1	1	1	0	0	0
0	0	0	0	0	0	0	0	0	0

## Sheet: qlearn
0	1	0	0	0	0	0	0	0	0
1	1	1	1	0	0	0	0	0	0
0	0	0	1	0	0	0	0	0	1
0	0	0	0	0	0	0	0	0	0
0	0	0	0	0	0	0	1	0	0
0	0	0	0	0	0	1	0	0	0
0	0	0	0	0	0	0	0	1	0
0	1	0	0	0	0	0	0	0	1
1	1	1	0	0	0	1	0	0	1
0	1	0	1	0	0	0	0	1	0
0	0	0	0	0	0	0	0	0	0
0	1	0	0	0	1	0	0	1	0
0	1	0	0	0	0	0	1	0	0
0	0	0	0	0	0	1	0	0	0
0	0	0	0	0	0	0	0	0	0
0	0	0	1	1	1	1	0	0	0
1	0	0	1	0	0	0	1	1	0
1	0	0	0	0	0	0	1	1	0
1	0	0	0	1	0	0	0	0	0
0	0	0	1	0	0	0	1	0	1
1	1	1	0	0	0	0	0	0	0
0	1	0	0	0	0	0	1	0	0
0	0	1	0	0	0	0	1	0	1
0	1	1	0	0	0	0	0	0	0
0	0	0	1	0	0	1	0	0	0
0	0	0	0	1	1	1	0	0	0
0	0	0	1	0	1	0	0	0	0
1	0	1	0	0	0	1	0	0	0
0	0	0	1	1	0	0	0	0	1
0	0	0	0	0	0	0	1	1	0
0	0	0	1	0	0	0	0	0	1
0	0	0	0	0	0	1	0	1	1
0	0	0	0	0	0	0	1	0	0
0	0	0	1	0	0	0	0	0	1
1	0	0	1	0	0	0	0	1	0
0	0	0	0	0	0	1	1	1	0
1	0	0	1	1	0	0	0	0	0
0	0	1	1	0	0	0	0	0	0
0	0	0	1	1	0	0	0	0	0
0	0	0	0	0	0	0	0	1	0
0	1	0	0	0	1	0	1	0	0
0	0	1	0	0	0	0	0	0	0
0	1	1	0	0	0	0	0	1	1
0	0	0	0	0	1	0	0	1	1
1	0	0	0	0	1	0	1	1	0
0	1	0	0	0	0	0	0	0	0
0	0	1	0	1	0	0	0	1	0
0	0	0	0	0	0	0	0	0	1
1	0	1	0	1	0	0	1	0	1
0	1	0	0	1	0	1	1	0	0
0	0	0	0	0	0	0	1	1	0
0	0	1	1	0	0	0	1	1	0
0	0	0	1	0	0	1	0	0	0
0	0	1	1	0	1	0	0	0	1
0	0	0	0	0	0	0	1	1	0
0	1	1	0	0	0	0	0	0	0
0	1	0	0	0	0	0	0	0	1
1	0	0	0	0	0	0	0	1	0
0	0	0	0	0	0	0	0	0	0
1	0	0	1	0	0	0	0	0	0
0	0	0	0	0	0	1	0	0	0
0	0	0	1	0	0	0	0	0	0
0	1	0	1	0	0	0	0	1	0
0	1	0	1	0	0	0	1	0	0
0	0	0	1	0	0	0	0	0	0
0	0	0	0	0	0	1	0	0	1
0	1	0	0	0	0	0	0	0	0
1	1	0	1	0	0	1	0	0	1
0	0	1	0	0	1	0	0	0	0
1	0	0	0	0	0	0	1	1	1
0	1	1	1	0	0	0	1	1	1
0	1	0	0	0	0	0	0	0	0
0	0	0	1	0	0	1	1	0	0
0	1	1	0	0	0	0	0	0	0
1	1	0	1	0	0	0	1	0	0
0	0	0	0	1	0	1	0	1	0
0	1	1	0	0	0	0	1	0	0
0	0	0	1	0	0	0	0	0	0
0	1	0	0	0	1	0	0	0	0
0	0	0	1	0	0	0	1	1	0
0	0	0	0	1	0	0	1	0	1
0	0	0	0	1	0	0	0	0	0
0	0	1	0	0	0	0	0	0	0
0	0	0	0	0	0	0	0	0	0
1	0	0	0	0	1	0	1	0	1
0	1	0	0	0	0	1	0	0	1
1	0	0	0	0	0	0	0	1	0
0	0	0	1	0	0	0	0	0	0
0	1	1	0	0	0	1	0	1	0
0	0	0	0	0	1	0	0	0	0
0	0	0	1	0	0	0	0	0	0
0	0	1	0	0	1	0	0	0	1
0	1	1	0	0	1	0	0	0	0
1	0	0	0	0	0	1	0	0	1
1	1	0	1	1	0	0	0	0	0
0	0	0	0	0	0	0	0	0	0
0	1	1	1	0	0	0	0	1	0
0	0	0	0	0	0	1	0	0	1
0	0	0	0	0	0	1	0	0	0
1	0	0	0	0	1	0	1	0	0
0	0	0	0	0	0	0	0	0	0
0	0	0	1	0	1	1	0	0	0
0	0	0	0	1	1	0	1	0	0
0	1	0	0	0	0	0	0	0	0
0	0	0	0	1	0	0	0	0	0
0	1	0	0	1	0	0	0	0	0
0	0	0	0	0	1	0	0	1	0
0	0	0	1	0	0	1	0	0	0
0	1	0	0	0	1	0	1	0	0
1	1	0	0	0	1	0	0	1	0
0	0	0	0	1	1	1	0	0	0
0	0	0	0	1	0	1	0	1	0
0	1	1	0	1	0	0	0	0	0
1	0	0	0	0	0	0	0	0	0
0	0	1	0	0	0	0	1	0	0
0	0	0	0	1	0	0	0	0	0
0	0	0	0	0	0	0	0	0	0
1	0	0	1	0	0	0	0	0	0
0	1	0	0	1	1	0	1	0	0
0	0	0	0	0	0	1	1	0	1
0	1	1	0	0	0	0	0	0	0
0	1	0	0	0	0	0	0	1	0
1	0	0	0	0	1	0	0	0	0
0	0	0	0	0	1	0	0	0	0
0	0	0	0	0	0	0	0	0	0
0	0	0	0	0	0	0	0	1	0
0	0	1	0	0	0	0	0	1	0
1	0	0	0	0	0	1	0	1	0
1	0	0	0	0	0	0	1	0	1
0	0	1	1	0	0	0	0	0	0
0	0	0	0	0	0	0	0	1	0
1	0	0	0	0	1	0	0	0	0
0	1	0	0	0	0	0	1	0	0
1	0	0	0	0	1	0	0	0	1
0	0	0	0	0	0	0	0	0	1
0	0	0	0	0	0	0	0	1	1
0	0	0	0	1	0	0	1	0	0
0	0	0	0	0	0	0	0	0	0
0	1	1	1	0	0	0	0	1	0
0	0	0	0	0	0	0	0	0	0
0	0	0	0	0	0	0	0	0	0
0	0	1	0	0	0	0	0	1	1
0	1	1	0	0	0	0	0	1	0
1	0	1	0	0	0	0	0	0	0
0	0	0	1	1	0	1	0	0	0
0	0	0	0	1	1	1	0	0	0
0	1	0	1	0	0	0	0	0	0
0	0	0	0	0	0	0	1	0	1
0	0	0	0	0	0	0	0	0	0
0	1	1	0	0	0	1	0	0	1
0	0	0	1	0	0	0	0	0	0
0	0	0	0	0	0	0	1	0	0
0	0	0	0	0	0	0	0	0	0
0	1	0	1	0	0	1	0	1	0
0	0	0	0	0	1	0	0	1	0
0	0	1	0	0	0	0	0	0	0
1	1	0	0	1	0	1	0	1	0
0	1	1	0	0	0	1	1	0	1
0	0	0	0	0	0	0	0	0	0
0	0	0	0	0	0	0	0	1	1
0	1	0	0	0	0	0	0	0	0
1	0	0	1	0	0	0	0	0	0
1	0	0	0	0	1	0	0	0	0
0	0	0	0	0	0	1	0	0	1
0	0	1	0	1	1	0	0	0	0
1	0	0	0	1	0	0	0	0	0
0	0	0	0	0	0	0	0	0	0
0	0	0	0	0	0	1	0	0	0
0	0	0	1	0	0	0	0	0	0
0	0	0	0	1	0	0	0	1	0
0	0	0	0	0	0	0	0	1	0
1	0	0	0	1	1	0	0	0	0
0	0	0	0	0	0	1	0	0	0
0	1	0	0	0	1	0	0	0	0
0	0	1	1	0	0	0	0	0	1
0	0	0	0	0	0	0	0	1	0
1	0	0	0	0	0	1	0	0	0
0	0	0	0	0	1	0	0	0	0
0	1	0	0	1	1	0	0	0	0
1	0	0	0	0	0	0	0	0	0
0	0	0	0	0	0	0	0	0	1
0	0	1	0	1	0	0	0	0	1
0	0	0	0	0	0	0	0	0	0
1	0	0	0	1	0	0	0	1	0
0	0	0	0	0	0	0	0	0	0
0	0	0	0	0	0	0	0	0	0
1	0	0	0	1	0	1	0	0	0
0	0	1	0	1	0	0	0	0	0
1	1	0	1	0	0	1	0	0	1
0	0	1	0	0	0	0	0	0	0
0	0	0	0	0	0	0	1	0	0
0	1	0	0	0	0	0	0	1	1
0	0	1	0	0	0	0	0	0	0
0	0	0	0	1	0	0	0	0	0
0	0	1	0	0	0	0	0	0	0
1	0	0	0	0	0	0	0	1	1
0	1	0	0	0	0	1	0	0	1
1	0	0	0	0	0	0	1	0	0
0	0	0	0	0	0	0	0	0	0
1	0	1	0	0	0	0	0	0	0
0	1	0	0	1	0	1	0	1	1
0	0	0	0	1	1	0	0	0	0
0	0	0	0	1	0	0	0	0	0
1	1	0	1	0	1	0	1	1	0
0	0	0	0	0	0	0	0	0	0
0	0	0	0	0	1	0	0	0	0
0	0	1	0	0	0	0	0	0	0
0	0	0	0	0	0	0	0	0	0
0	0	0	0	0	0	0	1	0	0
1	1	0	0	0	0	0	0	0	0
0	0	0	0	0	0	1	0	0	0
1	0	0	0	0	0	0	0	0	0
0	0	0	1	0	1	0	0	0	1
0	0	0	0	0	1	1	1	0	0
0	1	0	0	0	0	0	0	0	0
0	0	0	0	0	0	0	0	0	0
0	0	0	0	0	1	0	0	0	0
0	0	1	0	0	0	1	0	0	0
1	1	0	1	0	0	0	0	0	0
0	0	0	0	0	0	0	0	0	0
0	0	0	1	0	0	0	0	1	1
0	0	0	1	1	1	0	0	1	0
0	0	0	0	0	1	0	0	0	0
0	0	0	0	0	0	0	0	0	0
0	0	0	0	0	0	0	1	0	1
0	0	0	0	0	1	1	0	0	0
0	0	0	0	0	0	1	0	0	0
0	0	0	1	0	0	0	0	0	0
0	0	1	0	1	0	1	0	0	0
0	0	1	0	0	0	0	0	0	0
0	0	0	1	0	0	0	0	0	0
1	0	0	0	0	0	0	0	0	1
0	0	0	1	0	0	1	0	0	1
0	0	0	0	0	0	0	0	0	1
0	0	0	0	0	0	0	1	0	1
0	0	0	0	0	0	0	0	1	0
0	1	0	0	0	0	0	0	0	0
0	0	0	0	0	1	0	0	0	0
0	0	0	0	0	0	0	0	0	0
0	0	1	0	0	0	0	0	0	0
0	0	0	0	1	0	0	0	0	0
1	0	0	0	0	0	1	0	0	0
0	0	0	0	1	0	1	0	0	0
0	1	0	1	0	0	0	0	0	0
0	0	0	0	0	0	0	0	0	1
0	0	0	0	0	1	1	1	0	0
1	0	0	1	0	1	0	0	0	0
0	0	0	0	0	0	0	0	0	1
0	0	0	0	0	0	0	1	0	1
0	1	1	0	0	0	0	0	0	1
0	0	0	0	1	0	0	0	0	0
1	0	1	0	0	1	0	0	0	0
1	0	0	0	0	0	0	0	0	0
1	0	0	0	0	1	0	1	0	0
0	1	1	1	0	0	0	0	0	1
0	0	0	0	0	0	0	0	0	1
0	0	0	0	0	0	1	0	0	1
0	0	1	0	0	0	0	0	0	0
0	0	1	0	1	0	0	0	0	0
0	0	0	0	0	1	0	0	0	1
0	0	0	0	0	0	0	0	0	1
0	0	1	0	0	0	0	0	0	0
0	0	0	0	0	0	0	0	0	0
1	0	0	0	1	0	0	0	0	0
0	0	0	0	0	1	0	0	0	0
0	0	0	0	0	0	1	0	0	0
0	0	1	0	0	0	0	0	0	1
0	0	0	0	0	0	1	0	0	0
0	0	0	0	0	0	0	1	0	0
0	0	0	0	0	0	0	0	1	0
0	0	0	0	0	0	0	1	0	0
0	0	0	0	1	0	1	1	1	0
0	0	0	1	0	0	0	0	0	0
0	0	0	0	0	0	0	0	0	0
0	0	0	0	0	0	0	0	0	0
1	0	0	0	0	0	1	1	0	0
1	1	0	0	0	0	0	0	1	0
0	0	1	0	0	0	0	1	0	1
0	0	1	0	0	0	0	0	1	0
0	0	0	0	0	0	0	0	0	0
0	0	0	0	0	0	0	0	0	0
0	0	0	0	0	0	0	0	0	0
1	1	0	0	0	0	1	0	1	0
0	0	0	0	0	0	0	0	1	1
0	0	0	0	0	0	0	0	0	0
0	0	0	0	0	0	0	1	0	1
0	0	0	0	0	1	0	1	0	1
0	0	0	0	0	0	1	0	1	0
0	0	0	0	0	0	0	0	1	0
0	0	0	0	0	0	0	0	1	0
0	0	0	0	0	1	0	0	0	0
0	0	0	0	1	0	1	0	0	0
1	0	0	0	0	0	1	0	0	0
1	1	0	0	0	1	0	0	0	0
0	0	0	0	1	1	0	0	1	0
0	0	1	0	0	1	0	0	0	1
0	0	0	0	0	0	0	0	1	0
0	0	0	0	0	0	0	0	0	0
0	0	0	0	0	1	0	0	0	0
0	1	0	0	0	1	1	0	0	0
0	0	0	0	0	0	0	1	1	1
1	1	0	1	0	1	0	1	1	0
1	0	0	0	1	0	0	0	1	0
0	1	0	0	0	0	0	0	1	1
0	0	0	0	0	0	0	0	1	0
0	0	0	0	0	1	0	0	0	0
0	0	0	0	1	0	0	1	1	0
1	1	0	0	1	0	1	0	0	0
0	0	1	0	1	0	0	0	0	0
0	1	0	0	0	0	1	0	0	0
0	1	1	1	0	0	0	0	0	0
1	0	0	0	0	0	0	0	0	0
1	0	1	1	1	0	0	0	0	0
0	0	0	0	1	0	0	0	0	0
0	1	0	0	0	0	0	0	0	0
0	0	1	0	0	0	0	1	1	1
0	0	0	0	0	0	1	0	0	1
0	0	1	1	0	1	0	0	0	0
0	1	0	0	0	0	0	0	0	0
0	0	0	0	0	0	1	0	0	1
1	0	0	0	0	0	0	0	0	1
0	0	0	0	0	0	0	0	0	0
0	0	0	0	0	0	0	1	0	0
0	0	0	0	0	0	0	0	0	0
1	0	0	0	1	0	0	0	0	0
1	0	0	0	0	0	0	0	0	0
0	1	0	0	1	0	0	1	0	0
0	1	0	0	1	0	0	1	1	0
0	0	0	0	0	0	0	0	0	0
1	0	0	0	0	1	0	0	0	0
0	1	0	0	0	0	0	0	0	0
1	0	1	0	1	1	0	1	0	1
0	1	0	0	0	0	0	0	0	0
0	0	0	0	0	0	0	0	0	0
0	0	0	0	1	0	0	0	0	0
1	0	1	0	0	0	0	0	0	0
0	0	0	0	0	0	0	0	0	0
0	0	0	1	0	0	0	0	0	0
0	0	0	0	0	0	1	0	0	0
0	1	0	0	0	0	0	0	0	1
0	0	0	0	0	0	0	0	0	0
1	0	0	0	0	0	0	0	1	0
0	0	1	0	1	1	0	0	0	1
1	0	0	0	0	0	0	0	0	1
0	0	0	0	0	1	0	1	0	0
0	0	0	1	0	0	0	0	0	0
0	0	0	0	0	1	0	0	0	0
0	0	1	0	0	0	0	1	0	0
0	1	1	0	0	0	0	0	0	0
0	0	1	0	0	0	0	0	0	0
0	0	1	0	0	0	0	0	0	0
0	1	0	0	0	0	0	0	0	1
0	0	0	1	0	0	0	0	0	1
1	0	0	1	1	0	0	0	0	0
0	0	0	0	0	0	0	0	0	0
0	0	1	0	0	0	0	0	0	0
1	0	0	1	0	1	1	1	0	1
0	1	0	0	0	0	0	0	0	0
0	0	0	0	1	0	0	0	0	0
1	1	0	0	0	1	0	0	0	1
1	1	0	0	0	1	0	0	0	0
0	0	0	0	0	0	0	0	0	0
0	0	0	0	1	0	0	0	0	0
0	1	0	1	0	1	0	0	0	0
0	0	0	1	0	0	0	0	0	1
0	0	0	1	0	0	0	0	0	0
0	0	1	0	1	0	1	0	0	0
0	0	0	0	0	0	0	0	1	0
0	0	0	0	0	0	0	0	0	0
0	1	0	0	0	0	0	0	0	0
1	0	0	0	0	0	0	1	0	0
0	0	0	0	1	1	0	0	0	1
0	0	0	1	1	0	0	0	0	0
1	0	0	0	0	0	1	1	0	0
1	1	0	0	0	0	0	0	1	0
0	0	0	0	1	0	0	0	0	0
0	0	0	0	0	0	0	0	0	0
0	0	0	1	0	0	0	0	0	1
1	0	0	1	0	0	1	0	0	0
0	0	0	0	0	0	0	1	0	0
0	0	1	1	0	0	0	0	1	0
0	0	0	0	0	0	0	0	1	0
1	1	0	1	0	0	1	0	0	0
0	0	0	0	1	0	0	0	0	0
0	0	0	0	1	0	0	0	0	0
0	0	1	1	1	1	0	0	0	0
1	0	0	0	0	0	0	0	0	0
1	0	1	0	0	1	0	0	0	1
0	0	0	0	0	1	0	0	0	0
0	0	0	0	0	0	0	1	0	0
0	0	1	0	0	0	0	1	0	0
0	0	0	1	0	1	0	0	0	1
1	0	0	0	0	0	0	0	0	0
0	0	0	0	0	0	1	0	0	0
0	1	1	0	0	1	0	0	1	0
0	0	0	0	0	0	0	0	0	0
1	0	1	0	0	0	1	0	0	1
1	0	0	0	0	0	1	0	0	0
0	0	0	0	0	1	0	1	0	0
0	0	0	0	0	0	0	1	1	0
0	0	1	0	0	0	0	0	0	1
0	0	0	0	0	0	0	0	1	0
0	0	1	0	1	0	0	0	1	0
0	0	0	0	0	1	0	0	0	0
0	1	0	0	1	0	0	1	0	0
0	1	0	0	0	0	0	0	0	1
0	0	0	0	1	0	0	0	0	0
0	0	0	0	0	0	0	0	1	0
0	1	0	0	0	0	0	0	0	0
0	0	0	0	0	0	0	0	0	0
0	1	0	1	0	0	0	0	0	0
0	0	0	0	0	0	0	0	0	0
0	0	1	0	0	0	0	0	0	0
0	1	0	0	1	0	0	1	1	0
0	0	0	0	0	0	0	1	1	1
0	0	0	0	0	0	1	0	1	0
0	0	0	0	0	1	0	0	0	0
0	0	0	1	0	1	0	0	0	0
0	0	1	0	0	0	0	0	0	0
0	0	0	0	0	0	0	0	0	0
1	0	0	0	0	0	0	0	1	0
0	1	1	0	1	1	0	0	1	1
0	0	0	0	0	0	0	0	0	0
1	0	1	0	1	0	0	0	0	0
0	0	0	0	0	0	0	0	0	1
0	1	0	1	0	1	1	0	0	1
0	0	1	0	0	0	1	0	0	0
0	0	1	0	0	0	0	0	1	0
0	0	0	1	1	0	0	0	0	1
0	1	0	0	1	0	1	0	1	0
0	0	1	1	0	0	0	0	0	0
1	0	0	0	0	0	1	0	0	0
0	0	0	1	0	1	0	0	1	1
0	0	0	0	0	0	1	0	0	0
0	0	0	0	0	0	0	0	0	0
0	0	1	0	1	0	1	0	0	1
0	0	0	0	0	0	0	0	0	0
0	0	0	0	0	0	0	1	0	0
1	0	0	0	0	0	0	1	0	0
0	1	0	0	0	1	0	1	0	0
0	0	0	0	0	0	1	0	0	0
1	1	0	0	0	1	0	1	0	0
1	0	0	0	0	0	0	0	0	0
0	0	0	0	0	0	0	0	1	0
0	1	0	0	0	0	0	0	0	0
0	0	0	0	0	1	1	0	0	1
0	0	0	1	1	0	1	0	0	0
0	0	0	1	0	0	1	0	0	0
0	0	1	0	0	0	0	0	1	0
0	0	0	0	0	0	1	0	1	0
0	0	0	0	0	1	0	1	0	0
0	0	0	0	0	0	0	0	0	0
0	0	0	0	0	1	0	0	0	0
0	1	0	1	1	0	0	0	0	0
0	0	0	0	0	0	0	1	0	0
0	0	0	1	0	1	0	0	0	0
1	0	1	0	0	1	0	1	1	1
0	0	1	0	0	0	0	0	0	0
0	0	0	0	0	0	0	0	0	0
0	0	0	0	0	0	0	1	0	0
0	0	1	1	0	0	0	0	0	0
0	0	0	0	0	0	0	0	0	0
0	1	0	0	1	1	0	0	0	0
0	0	0	0	1	0	0	0	0	0
0	0	0	0	1	0	1	0	0	0
0	1	0	0	0	0	0	0	0	0
0	0	0	1	0	0	0	0	0	0
0	0	0	0	0	0	0	0	0	0
0	0	0	0	0	0	1	0	0	0
0	0	0	0	0	1	0	1	1	0
0	0	0	0	1	1	0	0	0	0
0	0	0	0	1	1	0	0	0	1
0	0	0	0	1	1	0	0	0	0
0	0	0	0	1	0	0	1	0	0
0	1	0	0	0	0	1	0	0	0
1	0	0	0	0	0	0	0	1	0
0	0	0	0	0	0	0	0	0	0
0	0	0	1	0	0	0	0	1	1
0	0	0	0	0	0	1	1	0	0
0	0	0	0	1	0	0	0	0	0
0	0	0	0	0	0	0	0	0	0
0	0	0	0	0	1	0	0	1	0
0	1	0	0	0	1	1	0	1	0
0	0	0	1	1	0	0	0	0	0
0	0	0	0	1	1	0	1	1	0
0	0	0	1	0	1	1	0	0	0
0	1	0	0	0	0	0	0	0	0
0	0	0	0	0	0	0	1	0	0
0	0	0	0	1	0	1	0	0	0
0	0	0	0	0	0	0	0	0	0
0	0	1	1	0	0	0	0	0	0
0	0	0	1	1	0	0	0	1	0
0	0	0	1	0	0	0	0	1	0
0	0	0	0	0	0	0	0	0	0
0	0	1	0	0	0	0	0	0	0
0	0	0	0	0	0	1	0	0	1
0	0	0	0	1	1	0	0	0	0
0	0	0	0	0	0	0	0	0	0
1	0	0	1	0	0	0	0	0	1
0	0	1	0	0	0	0	0	0	0
1	1	0	0	0	1	0	0	1	1
0	0	0	0	0	0	1	0	0	1
1	0	0	1	0	1	0	0	0	0
0	1	0	0	1	0	1	1	0	0
0	0	0	0	1	1	1	0	0	0
0	0	1	0	1	1	0	0	0	0
1	0	0	0	1	0	1	0	0	0
0	1	0	1	1	1	1	0	0	0
0	0	0	0	1	0	0	0	0	0
0	0	0	0	0	0	0	0	1	1
0	0	1	0	1	0	0	1	0	0
1	0	0	0	1	1	0	0	0	1
0	0	1	0	0	0	0	0	0	0
0	0	0	1	1	0	0	0	0	0
0	0	0	0	0	0	0	0	0	0
0	0	0	0	0	1	0	0	1	0
0	0	0	0	0	0	0	0	0	0
0	0	0	0	0	1	0	0	0	0
0	1	0	1	0	0	1	0	0	1
0	1	1	0	0	0	1	0	1	0
1	0	0	0	0	0	0	0	0	0
0	1	1	0	0	0	1	0	0	0
0	0	0	1	0	0	0	0	1	0
0	1	0	0	0	1	0	0	0	1
1	0	0	1	0	0	1	1	0	1
0	1	0	0	0	1	0	1	0	0
0	0	0	0	0	0	1	1	1	1
0	0	1	0	0	0	0	0	1	0
0	0	0	0	0	1	0	0	0	1
0	0	0	1	0	0	0	0	0	0
0	0	0	0	0	0	0	0	0	0
0	0	0	0	0	0	1	1	1	1
0	0	1	0	0	0	0	0	0	0
0	1	1	0	0	0	0	0	1	1
0	0	0	0	0	1	0	1	0	0
0	0	0	0	0	1	0	1	1	0
0	1	0	0	1	0	1	0	0	0
0	0	0	0	0	0	1	0	1	0
1	0	0	0	0	0	1	0	0	1
1	1	0	0	0	0	0	0	0	0
0	0	0	0	1	1	0	0	0	0
1	0	1	0	0	0	0	0	0	1
0	0	0	0	0	0	0	0	1	1
0	0	0	0	0	0	0	0	0	0
1	1	0	0	0	0	0	0	0	0
0	0	0	1	0	0	0	0	0	1
0	0	0	0	0	0	0	1	0	0
0	0	0	1	0	0	0	1	0	0
0	0	1	0	0	0	0	0	0	0
0	1	0	0	0	1	0	1	0	1
1	0	0	1	1	0	0	1	0	0
0	1	0	1	0	0	1	1	0	0
0	0	0	0	0	1	0	0	0	0
1	0	0	0	0	0	0	0	0	0
0	0	0	1	0	0	0	1	1	0
0	0	1	1	0	0	0	0	1	0
0	0	0	0	0	0	0	0	0	0
1	1	0	0	0	0	0	1	0	0
0	0	0	0	0	0	0	1	1	0
0	0	1	1	1	0	0	0	1	1
0	0	1	0	0	0	0	0	1	0
0	0	1	0	0	0	0	0	0	0
0	1	0	0	0	0	0	0	1	0
0	0	0	0	0	0	0	0	1	0
0	0	0	0	0	0	0	0	1	0
1	0	0	0	0	0	0	0	0	0
0	1	0	0	1	1	0	0	0	0
0	0	0	0	1	0	0	0	1	0
0	0	0	0	0	0	0	0	0	0
0	0	0	0	0	0	0	0	1	0
1	0	0	0	0	1	0	0	0	0
0	0	1	0	0	0	1	0	0	0
0	0	1	1	0	0	0	0	0	0
0	0	0	0	1	0	0	1	0	0
0	0	0	1	0	1	0	1	1	0
0	0	0	1	1	0	0	0	0	0
0	0	0	0	0	0	0	0	0	0
0	0	0	0	1	1	1	1	0	0
0	0	0	0	0	0	0	0	1	0
0	0	0	0	0	1	0	0	1	0
0	1	0	0	0	0	0	0	1	0
1	0	0	0	0	0	0	0	0	0
0	1	1	0	1	0	0	0	1	0
0	0	0	0	0	0	0	1	0	1
0	0	1	0	0	1	0	0	0	0
1	0	0	1	0	0	0	0	0	0
0	0	0	0	0	1	0	0	0	1
0	0	0	0	0	0	1	0	0	0
0	0	0	0	1	0	0	0	0	0
1	0	0	1	0	0	0	1	0	0
1	0	0	0	0	0	0	0	0	0
0	0	0	0	0	0	0	0	0	0
0	0	0	0	1	0	0	0	1	0
0	0	0	1	0	1	0	0	0	0
1	0	1	0	0	0	1	0	0	0
0	0	0	1	0	0	0	1	0	0
1	1	0	0	1	1	0	1	0	0
0	0	1	0	0	0	1	0	0	0
0	0	0	0	1	1	0	0	0	0
0	0	0	0	0	0	0	0	0	0
1	0	0	0	0	0	0	0	0	0
0	0	0	0	1	0	0	1	0	0
0	1	0	1	0	0	0	0	0	0
1	1	0	1	1	1	0	0	0	0
0	1	0	1	1	0	0	0	0	0
1	1	1	1	0	1	0	0	0	1
0	0	0	0	0	0	0	0	1	0
0	0	0	0	0	0	0	0	0	0
0	0	0	0	0	1	0	0	0	0
0	0	0	0	1	0	0	0	0	0
0	0	0	0	0	0	0	0	0	1
0	0	0	0	0	0	0	0	0	0
0	0	1	1	0	0	0	1	0	1
0	0	0	1	0	0	0	1	1	0
0	0	0	0	0	0	0	0	0	0
0	1	0	0	1	1	0	0	0	0
0	1	0	0	0	0	0	0	0	0
0	0	0	0	0	0	0	0	0	0
0	0	0	0	1	1	0	0	0	0
1	0	0	0	0	1	1	0	0	0
0	0	0	0	1	1	1	1	0	0
0	0	1	1	0	0	0	0	1	0
0	1	0	1	0	0	0	1	0	0
0	0	0	0	0	0	0	1	0	0
0	0	0	1	0	0	0	0	0	0
0	0	0	0	0	0	0	0	0	0
0	0	0	1	1	0	0	0	0	0
1	0	0	0	1	0	0	1	0	0
1	0	0	0	1	0	0	1	0	0
0	0	0	0	0	1	0	0	0	0
0	1	0	0	0	1	0	1	0	0
0	0	0	0	0	0	1	0	0	0
0	0	0	1	0	0	0	0	0	0
0	0	0	0	0	0	0	0	0	0
0	0	0	1	0	1	0	0	1	1
0	1	0	0	0	0	0	0	1	0
0	0	1	0	1	0	0	0	1	0
0	1	0	1	0	1	0	0	0	0
0	0	1	0	1	0	0	1	0	0
1	0	0	0	0	0	1	0	1	0
1	0	0	0	1	0	1	0	0	0
0	1	0	1	0	0	0	0	0	0
0	0	1	0	0	1	0	0	0	0
1	1	0	0	1	0	0	1	0	0
0	0	1	0	0	0	1	0	0	0
0	0	0	1	0	0	0	0	0	0
0	0	0	0	1	0	0	0	0	0
0	0	1	0	0	0	0	0	1	0
0	0	0	0	0	0	0	0	0	0
0	1	0	0	0	0	0	0	0	0
0	0	0	1	0	0	0	0	0	0
0	0	0	0	0	0	0	1	1	0
1	0	0	0	0	0	1	0	0	0
0	0	0	0	1	1	0	0	0	0
0	0	0	0	1	0	0	0	1	0
0	0	0	0	1	1	0	0	0	0
0	0	0	0	0	0	0	0	0	0
1	1	0	0	0	0	0	1	0	0
1	0	0	0	0	0	0	0	0	0
0	0	0	0	0	0	0	1	0	1
0	1	1	0	0	0	0	1	0	0
0	0	0	0	0	1	0	0	1	0
0	0	0	0	0	0	1	0	0	0
0	0	0	0	0	0	0	0	0	0
0	0	1	0	0	1	0	0	0	0
0	0	0	1	0	0	0	0	1	1
1	0	0	0	0	0	0	0	0	0
0	0	0	0	0	0	0	0	0	0
0	0	1	0	0	0	0	0	0	1
0	0	0	0	0	1	0	0	0	1
0	1	1	1	0	1	0	0	0	0
0	0	0	0	0	0	0	0	1	0
0	1	0	0	0	1	0	0	1	0
0	0	0	0	0	0	0	0	0	0
0	0	0	0	0	0	0	0	0	0
0	0	0	0	0	0	0	0	0	0
0	0	0	0	0	0	0	0	0	0
0	0	0	1	0	0	0	0	0	0
0	0	1	0	0	0	0	0	0	0
1	0	0	0	1	1	1	0	1	1
1	0	0	0	0	1	0	0	0	0
0	0	0	0	1	0	0	0	0	0
0	0	0	1	1	0	0	0	0	0
1	1	1	0	0	0	0	1	0	0
0	0	0	1	1	0	0	0	0	0
0	1	1	0	0	0	0	0	0	0
0	0	0	0	0	0	0	0	0	0
0	0	0	0	1	1	0	0	0	0
1	1	0	0	0	0	0	0	0	0
0	0	1	0	0	0	0	0	0	0
1	0	0	0	1	0	1	0	0	0
0	0	0	0	0	1	0	1	0	0
0	0	0	0	0	0	0	0	1	0
1	1	0	0	0	1	0	0	0	0
0	0	0	0	0	0	0	0	0	1
0	0	0	0	0	0	0	1	1	0
1	0	0	0	0	0	0	0	0	0
0	0	0	0	0	0	0	1	0	1
0	0	0	0	1	0	1	0	1	0
1	1	0	0	0	0	0	0	0	0
0	0	1	0	1	0	0	0	0	0
0	1	0	0	0	0	0	0	0	0
1	0	0	1	0	1	0	1	0	0
0	0	0	0	0	0	0	0	0	1
0	0	0	1	0	0	0	1	0	1
1	1	0	0	0	0	0	1	1	0
1	1	1	0	0	0	0	0	0	0
0	1	0	0	0	0	1	0	1	1
0	0	1	0	0	0	0	1	0	0
0	0	0	0	0	0	0	1	0	0
1	0	1	1	0	0	1	0	1	0
0	1	0	1	0	0	0	0	0	0
0	1	0	0	0	0	1	0	0	0
0	0	0	0	0	1	0	0	0	0
0	1	0	0	0	0	1	0	0	1
0	0	0	0	1	1	0	0	0	0
0	1	1	0	0	0	0	0	0	0
0	0	0	0	1	0	0	0	1	0
0	1	0	0	0	0	0	0	0	1
0	1	0	0	1	0	0	0	1	0
0	0	0	0	0	0	0	0	0	0
0	0	0	0	0	0	1	0	0	0
0	0	0	0	0	0	0	0	0	0
0	0	0	0	0	1	1	0	1	0
0	0	0	1	0	0	0	0	0	0
0	0	1	0	0	0	1	0	0	0
1	0	1	1	0	1	0	1	0	1
0	1	0	0	0	0	0	1	0	0
1	0	0	0	1	0	0	1	0	0
0	0	0	0	1	0	0	0	0	1
0	0	0	0	0	1	0	0	1	0
0	0	0	0	0	0	0	0	0	0
0	0	0	0	0	0	0	0	0	0
0	0	1	1	1	0	0	0	1	0
0	0	0	0	0	0	0	0	0	1
0	0	0	0	1	0	0	0	1	0
0	0	0	0	0	0	0	0	0	0
1	0	0	0	1	0	1	1	0	1
0	0	0	0	0	0	0	0	1	1
0	0	1	0	0	0	0	0	0	1
0	0	0	0	0	0	0	1	0	0
0	1	0	0	1	0	0	0	1	0
0	0	1	0	0	0	0	0	0	1
0	0	0	0	0	0	0	0	0	0
0	0	0	1	0	1	0	0	1	0
0	0	1	0	0	0	0	0	0	0
1	0	0	0	0	0	0	1	0	0
0	0	0	0	0	0	1	0	1	1
0	0	0	0	0	0	0	0	0	1
1	0	0	0	0	0	0	0	0	1
0	0	0	0	1	0	0	1	1	0
0	0	0	0	0	1	0	0	0	0
0	0	0	0	1	0	1	0	0	1
0	0	0	0	0	0	0	0	0	0
0	1	0	0	0	0	0	0	0	0
0	1	1	0	0	0	0	0	0	0
1	0	0	0	0	1	0	0	0	0
0	1	1	0	0	0	0	0	1	1
0	0	0	0	0	0	1	0	0	0
0	0	0	0	1	0	0	0	0	0
0	0	1	0	1	1	1	0	0	0
0	0	0	1	0	0	0	0	0	0
0	0	0	0	0	0	0	0	0	0
0	0	0	0	0	0	0	0	0	0
0	0	0	0	0	0	1	1	0	0
0	0	0	0	0	1	0	1	0	1
0	1	1	0	0	0	1	0	0	0
0	0	0	0	0	0	1	0	0	1
0	0	0	0	0	0	0	1	0	0
0	0	0	0	0	0	0	0	0	0
0	0	1	0	1	0	0	0	0	0
0	0	0	1	0	0	0	0	0	0
0	1	0	0	1	0	1	0	0	0
0	0	0	1	1	0	0	0	0	0
0	1	0	0	0	0	1	0	0	1
0	0	0	1	1	1	0	0	0	1
0	1	0	0	1	0	1	0	0	0
0	1	0	0	0	0	0	1	1	0
0	0	0	0	1	0	0	0	0	1
0	1	0	1	0	1	0	0	0	0
0	0	0	1	0	1	1	0	0	0
1	0	0	1	1	1	0	0	1	0
0	0	0	0	0	0	0	0	0	0
0	0	0	0	0	0	0	1	0	0
0	0	0	1	0	0	0	0	0	0
0	0	0	1	0	1	0	0	0	0
0	0	0	0	0	0	0	1	0	1
1	0	1	0	0	1	0	0	1	0
0	0	0	0	0	0	0	0	0	0
0	0	0	0	0	0	0	0	0	1
0	0	0	0	0	0	0	0	1	0
0	0	0	0	0	0	0	0	0	1
0	0	0	0	0	0	0	0	0	0
0	0	0	0	0	0	0	0	1	0
1	0	0	0	0	0	0	0	0	1
0	0	0	1	0	0	0	0	0	1
0	0	0	1	0	0	1	0	1	0
0	0	0	1	0	0	1	0	1	0
0	0	0	0	0	1	0	0	0	0
0	0	0	0	0	1	0	1	0	0
0	0	0	0	1	0	1	0	0	1
0	0	0	1	1	0	0	0	0	0
0	0	0	0	0	1	0	0	1	0
0	0	1	0	0	0	0	0	0	0
0	0	0	0	1	0	0	0	0	0
0	0	1	0	0	0	1	0	0	1
0	0	0	0	0	0	1	0	0	0
0	1	0	0	0	0	1	0	0	1
0	0	0	0	0	0	0	0	1	1
0	0	1	1	0	0	0	0	1	1
1	0	0	0	0	0	0	0	1	0
0	0	0	0	0	0	0	1	1	0
0	0	1	0	1	1	0	1	1	1
0	1	0	0	0	0	0	0	0	0
0	1	0	0	0	0	0	0	1	0
0	0	1	0	0	0	1	0	0	0
0	1	0	1	0	0	0	0	0	0
0	0	0	0	0	0	0	0	0	1
0	0	0	0	0	0	0	0	1	1
0	0	0	0	1	1	0	0	0	0
0	1	0	0	0	0	0	0	0	0
0	0	0	1	0	0	0	0	0	0
0	0	0	0	0	0	0	0	0	0
0	0	0	0	0	1	1	1	0	0
0	0	0	0	0	0	1	1	0	0
0	0	0	0	1	0	0	1	0	0
0	1	1	0	0	0	1	0	0	0
0	0	0	0	0	0	0	0	1	0
0	0	1	0	0	0	0	0	0	0
1	0	0	0	0	0	0	1	0	1
0	0	0	0	0	0	1	1	0	0
0	0	1	0	0	0	1	0	1	0
0	1	0	0	1	1	0	1	1	1
0	0	0	0	0	0	0	1	1	0
0	0	0	0	1	0	0	0	0	0
1	0	1	0	0	0	0	0	0	0
0	0	0	1	1	1	0	1	0	0
0	1	0	0	0	0	0	0	0	1
0	1	0	0	1	1	0	0	0	0
0	0	0	0	0	1	0	0	1	0
1	0	1	0	1	0	0	0	0	1
0	0	1	0	0	0	0	1	0	0
0	1	0	0	1	0	0	1	0	0
0	0	0	0	1	0	0	0	0	0
0	0	1	0	0	0	0	0	0	0
0	1	0	0	1	1	0	0	0	0
1	0	0	0	0	0	0	0	0	1
0	0	0	0	1	0	1	0	0	0
0	0	0	0	0	0	0	0	0	0
0	0	0	0	0	0	1	0	0	0
0	0	0	1	0	1	1	0	0	0
0	0	0	0	0	0	0	0	1	0
0	0	0	0	1	0	0	0	0	0
0	0	1	0	0	0	0	0	0	0
0	0	0	0	1	1	1	1	0	0
0	0	0	0	0	0	0	0	0	0
1	0	1	0	0	0	0	1	0	0
0	0	1	0	0	0	1	0	0	0
0	0	0	1	0	0	0	0	0	0
0	1	0	0	0	0	0	0	0	1
0	0	0	1	1	0	0	0	0	0
0	0	0	0	1	0	1	0	0	0
0	0	0	0	0	0	0	0	0	1
0	0	0	0	1	0	1	1	1	0
1	1	0	1	0	0	0	0	0	0
0	1	1	0	0	0	0	0	1	1
0	0	0	0	1	0	0	0	0	0
0	0	1	0	0	0	0	0	0	0
1	0	0	0	0	1	0	0	0	1
1	0	0	1	0	0	0	0	0	0
0	0	1	0	0	1	0	0	1	0
0	1	1	0	0	0	0	0	1	0
0	0	0	0	0	0	0	1	0	0
0	0	0	0	0	0	0	1	0	0
0	1	0	0	0	0	0	0	1	0
0	1	0	1	0	0	0	1	0	0
0	1	0	0	0	0	0	1	0	1
0	0	0	0	0	0	0	0	0	0
0	0	0	1	1	0	1	0	1	0
0	0	0	0	1	0	0	1	1	0
1	0	1	0	1	0	0	1	0	0
0	0	0	0	0	0	0	1	1	0
0	1	1	0	1	0	0	0	0	0
0	0	0	1	1	0	0	0	0	0
0	0	0	0	0	0	0	0	0	0
0	0	1	0	1	0	0	0	0	0
0	0	0	0	0	1	0	0	0	0
0	1	0	0	0	0	0	1	0	0
0	0	0	0	0	0	0	0	0	1
0	0	0	1	0	0	0	0	0	0
0	0	0	0	0	0	0	0	0	0
0	0	0	0	0	0	0	0	0	1
0	0	1	0	0	1	0	0	0	0
0	0	1	0	1	0	0	0	0	0
0	1	0	0	0	0	0	0	0	0
0	1	0	0	0	0	0	0	0	0
0	1	0	0	0	0	1	0	0	1
0	1	1	0	0	0	0	1	1	0
0	0	0	1	0	0	0	1	0	0
1	0	0	1	0	0	1	0	0	0
0	0	0	1	0	0	0	1	0	0
0	0	0	1	0	0	0	0	0	0
0	0	0	0	1	0	1	0	0	0
0	0	0	0	0	0	0	0	0	0
0	0	0	0	0	1	1	0	0	0
0	0	1	1	1	1	0	1	1	0
0	0	0	0	0	0	1	1	0	0
0	0	0	0	0	0	0	0	0	1
0	0	0	0	1	0	0	0	0	0
0	0	0	1	0	0	0	1	0	0
0	1	0	0	0	1	0	1	0	0
1	0	1	0	0	0	1	0	0	0
0	0	0	0	0	0	0	1	1	0
0	0	0	1	1	0	0	0	0	0
0	1	1	1	0	1	0	0	0	0
0	0	0	1	1	0	0	0	0	1
1	0	1	0	0	0	1	0	0	0
0	0	1	0	0	0	0	0	1	1
0	1	0	0	0	0	0	0	1	0
0	0	1	0	0	0	0	1	1	0
0	0	0	0	0	0	1	1	1	0
0	1	1	0	1	0	0	0	0	0
1	0	1	0	0	1	1	0	0	0
0	0	0	0	0	0	1	0	0	0
0	1	0	1	0	0	0	1	0	0
0	0	0	0	0	0	0	0	0	0
0	0	0	0	0	0	0	0	0	0
1	0	0	0	1	0	0	1	0	0
1	0	0	0	1	1	0	0	0	0
0	0	0	0	1	0	0	0	0	0
0	0	0	0	1	0	1	0	1	1
1	1	0	0	0	0	0	1	0	0
0	0	1	1	0	0	0	0	0	0
0	0	0	0	0	0	0	0	0	0
1	1	0	0	0	1	0	0	0	0
0	0	1	1	0	0	0	0	0	0
0	0	1	1	1	0	1	0	0	0
0	1	0	0	0	0	0	0	0	0
1	0	0	0	0	0	1	1	0	0
0	0	0	0	0	1	0	0	0	0
0	1	0	0	0	1	0	1	0	1
0	0	0	0	0	0	0	1	1	0
1	0	0	1	0	0	0	0	0	0
0	0	0	0	0	0	0	0	0	0
1	0	0	0	0	0	0	0	0	0
0	0	0	0	0	0	1	0	0	1
1	0	0	0	0	0	1	0	0	0
1	0	1	0	0	0	0	0	0	1
1	0	0	0	1	0	0	1	0	0
0	0	0	0	1	1	0	0	0	1
0	0	0	0	0	0	0	0	0	1
0	0	0	0	0	0	0	1	0	0
0	0	1	1	0	1	0	0	0	0
0	0	0	0	0	0	0	1	0	0
0	0	0	0	0	0	1	1	1	0
0	1	0	0	1	0	0	0	0	1
0	0	0	0	0	0	0	0	0	0
0	0	0	0	1	0	0	1	1	0
1	0	0	0	0	0	0	0	0	0
0	1	0	0	0	0	0	0	1	0
0	0	0	0	0	0	0	0	0	0
0	0	0	0	0	0	0	0	0	0
0	1	0	0	0	0	0	1	0	0
0	0	0	0	1	0	1	0	0	1
0	0	1	0	0	0	0	1	0	0
0	0	0	0	0	0	0	1	1	0
0	0	0	0	0	0	0	0	0	0
0	0	0	0	0	1	0	0	0	0
0	0	0	0	0	0	0	1	0	0
0	0	1	0	1	0	0	0	0	0
0	0	0	0	0	1	0	0	1	1
0	1	1	0	0	0	0	1	0	0
0	1	0	0	1	0	0	0	1	0
0	0	1	0	1	0	0	0	0	1
1	1	0	0	0	0	0	0	0	0
0	0	1	0	0	0	0	0	0	0
0	1	1	1	0	0	1	0	0	0
0	0	0	0	0	1	0	1	0	1
0	0	1	0	0	0	0	0	0	1
0	0	0	1	1	0	1	1	0	0
0	1	0	0	0	0	0	0	0	1
1	0	0	0	0	0	0	0	0	1
0	0	0	0	0	0	0	0	0	0
0	0	0	0	0	0	1	0	0	0
1	0	0	1	0	1	0	0	0	1
0	0	0	0	0	0	1	0	1	0
0	0	0	0	0	0	1	0	0	0
0	0	0	0	0	1	0	0	1	1
1	0	0	0	1	0	0	0	0	1
0	0	0	0	0	0	0	1	0	0
0	0	1	1	0	0	0	0	0	1
1	1	0	0	0	1	0	1	0	0
0	0	0	0	0	0	1	1	0	0
0	0	1	1	0	0	0	0	1	0
0	0	0	0	0	0	0	0	1	0
0	0	0	0	0	1	0	0	0	1
1	1	0	0	0	0	0	0	0	0
0	0	0	0	0	1	0	0	0	0
1	0	0	0	0	0	1	0	1	0
0	1	0	0	0	0	0	0	0	1

## Sheet: together
steps	25th	50th	75th	25th	50th	75th	25th	50th	75th
400	0	0	0	0	0	0	0	0	0
800	0	0	0	0	0	1	0	0	0
1200	0	0	0	0	0	0	0	0	0
1600	0	0	0	0	0	0	0	0	0
2000	0	0	0	0	0	0	0	0	0
2400	0	0	0	0	0	0	0	0	0
2800	0	0	0	0	0	0	0	0	0
3200	0	0	0	0	0	0	0	0	0
3600	0	0	0	0	0.5	1	0	0	0
4000	0	0	0	0	0	0.75	0	0	0
4400	0	0	0	0	0	0	0	0	0
4800	0	0	0	0	0	0.75	0	0	0
5200	0	0	0	0	0	0	0	0	0
5600	0	0	0	0	0	0	0	0	0
6000	0	0	0	0	0	0	0	0	0
6400	0	0	0	0	0	1	0	0	0
6800	0	0	0	0	0	1	0	0	0
7200	0	0	0	0	0	0.75	0	0	0
7600	0	0	0	0	0	0	0	0	0
8000	0	0	0	0	0	0.75	0	0	0
8400	0	0	0	0	0	0.75	0	0	0
8800	0	0	0	0	0	0	0	0	0
9200	0	0	0	0	0	0.75	0	0	0
9600	0	0	0	0	0	0	0	0	0
10000	0	0	0	0	0	0	0	0	0
10400	0	0	0	0	0	0.75	0	0	0
10800	0	0	0	0	0	0	0	0	0
11200	0	0	0	0	0	0.75	0	0	0
11600	0	0	0	0	0	0.75	0	0	0.75
12000	0	0	0	0	0	0	0	0	0.75
12400	0	0	0	0	0	0	0	0	0
12800	0	0	0	0	0	0.75	0	0	0
13200	0	0	0	0	0	0	0	0	0
13600	0	0	0	0	0	0	0	0	0
14000	0	0	0	0	0	0.75	0	0	0
14400	0	0	0	0	0	0.75	0	0	0
14800	0	0	0	0	0	0.75	0	0	0
15200	0	0	0	0	0	0	0	0	0
15600	0	0	0	0	0	0	0	0	0
16000	0	0	0	0	0	0	0	0	0
16400	0	0	0	0	0	0.75	0	0	0
16800	0	0	0	0	0	0	0	0	0
17200	0	0	0	0	0	1	0	0	0
17600	0	0	0	0	0	0.75	0	0	0
18000	0	0	0	0	0	1	0	0	0
18400	0	0	0	0	0	0	0	0	0
18800	0	0	0	0	0	0.75	0	0	0.75
19200	0	0	0	0	0	0	0	0	0
19600	0	0	0	0	0.5	1	0	0	0
20000	0	0	0	0	0	1	0	0	0
20400	0	0	0	0	0	0	0	0	0
20800	0	0	0	0	0	1	0	0	0
21200	0	0	0	0	0	0	0	0	0
21600	0	0	0	0	0	1	0	0	0.75
22000	0	0	0	0	0	0	0	0	0.75
22400	0	0	0	0	0	0	0	0	0
22800	0	0	0	0	0	0	0	0	1
23200	0	0	0	0	0	0	0	0	0
23600	0	0	0	0	0	0	0	0	0
24000	0	0	0	0	0	0	0	0	0
24400	0	0	0	0	0	0	0	0	0
24800	0	0	0	0	0	0	0	0	0
25200	0	0	0	0	0	0.75	0	0	0.75
25600	0	0	0	0	0	0.75	0	0	0
26000	0	0	0	0	0	0	0	0	0
26400	0	0	0	0	0	0	0	0	0
26800	0	0	0	0	0	0	0	0	0
27200	0	0	0	0	0.5	1	0	0	0.75
27600	0	0	0	0	0	0	0	0	0
28000	0	0	0	0	0	1	0	0	0.75
28400	0	0	0	0	1	1	0	0	1
28800	0	0	0	0	0	0	0	0	0.75
29200	0	0	0	0	0	0.75	0	0	1
29600	0	0	0	0	0	0	0	0	0
30000	0	0	0	0	0	1	0	0	0
30400	0	0	0	0	0	0.75	0	0	0
30800	0	0	0	0	0	0.75	0	0	0.75
31200	0	0	0	0	0	0	0	0	0
31600	0	0	0	0	0	0	0	0	0
32000	0	0	0	0	0	0.75	0	0	0
32400	0	0	0	0	0	0.75	0	0	0
32800	0	0	0	0	0	0	0	0	0
33200	0	0	0	0	0	0	0	0	0
33600	0	0	0	0	0	0	0	0	0
34000	0	0	0	0	0	1	0	0	0
34400	0	0	0	0	0	0.75	0	0	0
34800	0	0	0	0	0	0	0	0	0
35200	0	0	0	0	0	0	0	0	0
35600	0	0	0	0	0	1	0	0	0
36000	0	0	0	0	0	0	0	0	1
36400	0	0	0	0	0	0	0	0	1
36800	0	0	0	0	0	0.75	0	0	0
37200	0	0	0	0	0	0.75	0	0	0
37600	0	0	0	0	0	0.75	0	0	0
38000	0	0	0	0	0	1	0	0	0.75
38400	0	0	0	0	0	0	0	0	0
38800	0	0	0	0	0	1	0	0	0
39200	0	0	0	0	0	0	0	0	0.75
39600	0	0	0	0	0	0	0	0	0
40000	0	0	0	0	0	0.75	0	0	0
40400	0	0	0	0	0	0	0	0	0
40800	0	0	0	0	0	0.75	0	0	0
41200	0	0	0	0	0	0.75	0	0	0
41600	0	0	0	0	0	0	0	0	0
42000	0	0	0	0	0	0	0	0	0.75
42400	0	0	0	0	0	0	0	0	0.75
42800	0	0	0	0	0	0	0	0	0
43200	0	0	0	0	0	0	0	0	0
43600	0	0	0	0	0	0.75	0	0	0
44000	0	0	0	0	0	1	0	0	0
44400	0	0	0	0	0	0.75	0	0	0
44800	0	0	0	0	0	0.75	0	0	0
45200	0	0	0	0	0	0.75	0	0	0
45600	0	0	0	0	0	0	0	0	0
46000	0	0	0	0	0	0	0	0	0
46400	0	0	0	0	0	0	0	0	0
46800	0	0	0	0	0	0	0	0	0
47200	0	0	0	0	0	0	0	0	0
47600	0	0	0	0	0	1	0	0	1
48000	0	0	0	0	0	0.75	0	0	1
48400	0	0	0	0	0	0	0	0	0.75
48800	0	0	0	0	0	0	0	0	0.75
49200	0	0	0	0	0	0	0	0	0.75
49600	0	0	0	0	0	0	0	0	0.75
50000	0	0	0	0	0	0	0	0	0
50400	0	0	0	0	0	0	0	0	0
50800	0	0	0	0	0	0	0	0	0
51200	0	0	0	0	0	0.75	0	0	0
51600	0	0	0	0	0	0.75	0	0	0
52000	0	0	0	0	0	0	0	0	0.75
52400	0	0	0	0	0	0	0	0	0
52800	0	0	0	0	0	0	0	0	0
53200	0	0	0	0	0	0	0	0	0
53600	0	0	0	0	0	0.75	0	0	0.75
54000	0	0	0	0	0	0	0	0	0.75
54400	0	0	0	0	0	0	0	0	0
54800	0	0	0	0	0	0	0	0	0
55200	0	0	0	0	0	0	0	0	0.75
55600	0	0	0	0	0	1	0	0	0.75
56000	0	0	0	0	0	0	0	0	0
56400	0	0	0	0	0	0	0	0	0
56800	0	0	0	0	0	0.75	0	0	0
57200	0	0	0	0	0	0.75	0	0	0.75
57600	0	0	0	0	0	0	0	0	0.75
58000	0	0	0	0	0	0.75	0	1	1
58400	0	0	0	0	0	0.75	0	0	0
58800	0	0	0	0	0	0	0	0	0.75
59200	0	0	0	0	0	0	0	0	1
59600	0	0	0	0	0	0	0	0	0
60000	0	0	0	0	0	1	0	0	0
60400	0	0	0	0	0	0	0	0	0
60800	0	0	0	0	0	0	0	0	0
61200	0	0	0	0	0	0	0	0	0
61600	0	0	0	0	0	1	0	0	0
62000	0	0	0	0	0	0	0	0	1
62400	0	0	0	0	0	0	0	0	0
62800	0	0	0	0	0.5	1	0	0	1
63200	0	0	0	0	0.5	1	0	0	0
63600	0	0	0	0	0	0	0	0	0.75
64000	0	0	0	0	0	0	0	0	0
64400	0	0	0	0	0	0	0	0	0
64800	0	0	0	0	0	0	0	0	0
65200	0	0	0	0	0	0	0	0	1
65600	0	0	0	0	0	0	0	0	0.75
66000	0	0	0	0	0	0.75	0	0	0
66400	0	0	0	0	0	0	0	0	0
66800	0	0	0	0	0	0	0	0	0
67200	0	0	0	0	0	0	0	1	1
67600	0	0	0	0	0	0	0	0	1
68000	0	0	0	0	0	0	0	0	0
68400	0	0	0	0	0	0	0	0	1
68800	0	0	0	0	0	0.75	0	0.5	1
69200	0	0	0	0	0	0	0	0	0
69600	0	0	0	0	0	0	0	0	0
70000	0	0	0	0	0	0.75	0	0	0
70400	0	0	0	0	0	0	0	0	1
70800	0	0	0	0	0	0	0	0	0
71200	0	0	0	0	0	0	0	0	0
71600	0	0	0	0	0	0.75	0	0	0
72000	0	0	0	0	0	0	0	0	0
72400	0	0	0	0	0	0	0	0	0
72800	0	0	0	0	0	0.75	0	0	0.75
73200	0	0	0	0	0	0	0	0	0.75
73600	0	0	0	0	0	0.75	0	0	0
74000	0	0	0	0	0	0	0	0	0
74400	0	0	0	0	0	0	0	0	0
74800	0	0	0	0	0	0.75	0	0	0
75200	0	0	0	0	0	0	0	0	0
75600	0	0	0	0	0.5	1	0	0	1
76000	0	0	0	0	0	0	0	0	0.75
76400	0	0	0	0	0	0	0	0	0.75
76800	0	0	0	0	0	0.75	0	0	0.75
77200	0	0	0	0	0	0	0	0	0.75
77600	0	0	0	0	0	0	0	0	1
78000	0	0	0	0	0	0	0	0	0.75
78400	0	0	0	0	0	0.75	0	0	0
78800	0	0	0	0	0	0.75	0	0	0
79200	0	0	0	0	0	0	0	0	1
79600	0	0	0	0	0	0	0	0	0
80000	0	0	0	0	0	0	0	0	0
80400	0	0	0	0	0.5	1	0	0	0
80800	0	0	0.75	0	0	0	0	0	0
81200	0	0	0.75	0	0	0	0	0	0
81600	0	0	0	0	1	1	0	0	0
82000	0	0	0	0	0	0	0	0	0
82400	0	0	0.75	0	0	0	0	0	0.75
82800	0	0	0	0	0	0	0	0	0
83200	0	0	0.75	0	0	0	0	0	0
83600	0	0	0	0	0	0	0	0	0
84000	0	0	0.75	0	0	0	0	0	1
84400	0	0	0.75	0	0	0	0	0	0
84800	0	0	0	0	0	0	0	0	0.75
85200	0	0	0	0	0	0.75	0	0	0
85600	0	0	0	0	0	0.75	0	0	0.75
86000	0	0	0.75	0	0	0	0	0	0
86400	0	0	0.75	0	0	0	0	0	0
86800	0	0	0.75	0	0	0	0	0	0
87200	0	0.5	1	0	0	0	0	0	0
87600	0	0	0	0	0	0.75	0	0	0
88000	0	0	1	0	0	0	0	0	0.75
88400	0	0	0	0	0	0.75	0	0	0
88800	0	0	0	0	0	1	0	0	0
89200	0	0	0.75	0	0	0	0	0	0.75
89600	0	0	1	0	0	0	0	0	0
90000	0	0	0.75	0	0	0	0	0	0
90400	0	0	1	0	0	0	0	0	0
90800	0	0	1	0	0	0	0	0	0
91200	0	0	1	0	0	0	0	0	0.75
91600	0	0	0.75	0	0	0.75	0	0	0
92000	0	0	0.75	0	0	0	0	0	0
92400	0	0	1	0	0	0	0	0	0
92800	0	0	1	0	0	0	0	0	0
93200	0	0	1	0	0	0.75	0	0	0.75
93600	0	0	1	0	0	0	0	0	0.75
94000	0	0	1	0	0	0	0	0	0
94400	0	0	1	0	0	0	0	0	0
94800	0	0	1	0	0	0	0	0	0
95200	0	0	1	0	0	0	0	0	1
95600	0	0	1	0	0	0	0	0	1
96000	0	0	1	0	0	0	0	0	0
96400	0	0	1	0	0	0	0	0	0
96800	0	0	0.75	0	0	0	0	0	0.75
97200	0	0	1	0	0	0	0	0	0
97600	0	0	1	0	0	0	0	0	0.75
98000	0	0	1	0	0	0	0	0	0.75
98400	0	0	1	0	0	0.75	0	0	0
98800	0	0	1	0	0	0.75	0	0	0
99200	0	0	1	0	0	0	0	0	0
99600	0	0	1	0	0	0	0	0	0
100000	0	0	1	0	0	0.75	0	0	0
100400	0	0	1	0	0	0	0	0	0
100800	0	0	1	0	0	0.75	0	0	0
101200	0	0	1	0	0	0	0	0	0
101600	0	0	1	0	0	0.75	0	0	1
102000	0	0	1	0	0	1	0	0	0
102400	0	0	1	0	0	0	0	0	0
102800	0	0	1	0	0	0	0	0	0
103200	0	0	1	0	0	0	0	0	0.75
103600	0	0	1	0	0	0	0	0	0
104000	0	0	1	0	0	0	0	0	0
104400	0	0	1	0	0	0	0	0	1
104800	0	0	1	0	0	0	0	0	0
105200	0	0	1	0	0	0	0	0	0.75
105600	0	0	1	0	0	0	0	0	0
106000	0	0	1	0	0	0	0	0	0
106400	0	0	1	0	0	0	0	0	0.75
106800	0	0	1	0	0	0	0	0	0
107200	0	0	1	0	0	0	0	0	0
107600	0	0	1	0	0	0	0	0	1
108000	0	0	1	0	0	0	0	0	0
108400	0	0	1	0	0	0	0	0	0.75
108800	0	0	1	0	0	1	0	0	0
109200	0	0	1	0	0	0	0	0	1
109600	0	0.5	1	0	0	0	0	0	1
110000	0	0	1	0	0	0	0	0.5	1
110400	0	0	1	0	0	0.75	0	0.5	1
110800	0	0	1	0	0	0.75	0	0	1
111200	0	0	1	0	0	0.75	0	0	0
111600	0	0	1	0	0	0	0	0	0
112000	0	0	1	0	0	0	0	0	0
112400	0	0	1	0	0	0	0	0	0.75
112800	0	0	1	0	0	0	0	0	0
113200	0	0	1	0	0	1	0	0.5	1
113600	0	0	1	0	0	0	0	0	0.75
114000	0	0	1	0	0	0	0	0	0
114400	0	0	1	0	0	0	0	0	0
114800	0	0	1	0	0	0.75	0	0.5	1
115200	0	0	1	0	0	0	0	0	0
115600	0	0	1	0	0	0	0	0	0
116000	0	0	1	0	0	0	0	1	1
116400	0	0	1	0	0	0	0	0.5	1
116800	0	0.5	1	0	0	0	0	0	0
117200	0	0	1	0	0	0	0	0	0.75
117600	0	0	1	0	0	0.75	0	0	0
118000	0	0	1	0	0	0.75	0	0	1
118400	0	0	1	0	0	0.75	0	0.5	1
118800	0	0.5	1	0	0	0	0	0.5	1
119200	0	0	1	0	0	0	0	0	0
119600	0	0	1	0	0	0	0	0	0
120000	0	0	1	0	0	0.75	0	0	0.75
120400	0	0.5	1	0	0	0.75	0	0	0.75
120800	0	0.5	1	0	1	1	0	0	0
121200	0	0	1	0	0	0.75	0	0	0
121600	0	0	1	0	0	0.75	0	0	0
122000	0	0	1	0	0	0	0	0	0
122400	0	0	1	0	0	0	0	0	0
122800	0	0	1	0	0	0.75	0	0.5	1
123200	0	0	1	0	0	1	0	0	0
123600	0	0	1	0	0	0	0	0	0
124000	0	0	1	0	0	0	0	0	0
124400	0	0	1	0	0	0.75	0	0	0
124800	0	0	1	0	0	0	0	0	0
125200	0	0	1	0	0	1	0	0	0
125600	0	0	1	0	0	0	0	0	0
126000	0	0	1	0	0	0	0	0	0
126400	0	0	1	0	0	1	0	0	0
126800	0	0	1	0	0	0	0	0	1
127200	0	0	1	0	0	0.75	0	0	1
127600	0	0	1	0	0	0	0	0	0
128000	0	0	1	0	0	0	0	0	0
128400	0	0.5	1	0	0	0	0	0	0
128800	0	0	1	0	0	0	0	0	0
129200	0	0	1	0	0	0	0	0.5	1
129600	0	0	1	0	0	0	0	0	0
130000	0	0	1	0	0	0	0	0	0
130400	0	0.5	1	0	0	0	0	0	0
130800	0	0	1	0	0	0.75	0	0	0
131200	0	0	1	0	0	1	0	0	0
131600	0	0	1	0	0	0	0	0	0
132000	0	0	1	0	0	0	0	0	0
132400	0	0	1	0	0	0	0	0	0
132800	0	0	1	0	1	1	0	0	1
133200	0	0	1	0	0	0	0	0	0
133600	0	0	1	0	0	0	0	0	0
134000	0	0.5	1	0	0	0	0	0.5	1
134400	0	0.5	1	0	0	0	0	0	0
134800	0	0.5	1	0	0	0	0	0	1
135200	0	0	1	0	0	0	0	0	0
135600	0	0	1	0	0	0	0	0	0
136000	0	0	1	0	0	0	0	0	0
136400	0	0.5	1	0	0	0	0	0	0
136800	0	0.5	1	0	0	0	0	0	0
137200	0	0	1	0	0	1	0	0	0
137600	0	0.5	1	0	0	0	0	0	0
138000	0	0	1	0	0	0	0	0	0
138400	0	1	1	0	0	0	0	0	0
138800	0	0.5	1	0	0	0	0	0.5	1
139200	0	1	1	0	0	0	0	0.5	1
139600	0	0.5	1	0	0	0	0	0	0
140000	0	0.5	1	0	0	0	0	0	0.75
140400	0	1	1	0	0	0	0	0	0
140800	0	0.5	1	0	0	0	0	0	0
141200	0	0.5	1	0	0	0	0	0	1
141600	0	0.5	1	0	0	0.75	0	0	0
142000	0	0.5	1	0	0	0	0	0	0.75
142400	0	0.5	1	0	0	0	0	0	0
142800	0	0.5	1	0	1	1	0	0	0
143200	0	0.5	1	0	0	0	0	0	0
143600	0	0.5	1	0	0	0	0	0	1
144000	0	0.5	1	0	0	1	0	0	0
144400	0	0.5	1	0	0	0.75	0	0	0
144800	0	0.5	1	0	0	0	0	0	0
145200	0	0.5	1	0	0	0	0	0	0
145600	0	1	1	0	0	0.75	0	0	0
146000	0	1	1	0	0	0	0	0	1
146400	0	1	1	0	0	0	0	0	0
146800	0	1	1	0	0	0.75	0	0	1
147200	0	1	1	0	0	0	0	0	0
147600	0	1	1	0	0	0	0	0	0
148000	0	1	1	0	0	0	0	0	0
148400	0	1	1	0	0	0	0	1	1
148800	0	1	1	0	0	0.75	0	0	0
149200	0	1	1	0	0	0	0	0	0
149600	0	1	1	0	0	0.75	0	0	1
150000	0	1	1	0	0	0.75	0	0	1
150400	0	0.5	1	0	0	0	0	0	0
150800	0	1	1	0	0	0	0	0	0
151200	0	1	1	0	0	0	0	0	1
151600	0	1	1	0	0	0.75	0	0	1
152000	0	1	1	0	0	0	0	0	0
152400	0	1	1	0	0	0.75	0	0	0
152800	0	1	1	0	0	0	0	0	0.75
153200	0	1	1	0	0	1	0	0	0
153600	0	1	1	0	0	0	0	0	0.75
154000	0	1	1	0	0	0	0	0	0
154400	0	1	1	0	0	1	0	0.5	1
154800	0	1	1	0	0	0	0	0	0
155200	0	1	1	0	0	1	0	0	0
155600	0	0.5	1	0	0	0	0	0	0.75
156000	0	0.5	1	0	0	0	0	0	0
156400	0	0.5	1	0	0	0	0	0	0
156800	0	0.5	1	0	0	0.75	0	0	0
157200	0	0.5	1	0	0	0	0	0	0
157600	0	0.5	1	0	0	0	0	0	0
158000	0	0.5	1	0	0	1	0	0	0.75
158400	0	0.5	1	0	0	0	0	0	0
158800	0	0.5	1	0	0	1	0	0	0
159200	0	0.5	1	0	0	0	0	0	0
159600	0	0.5	1	0	0	0	0	0	0.75
160000	0	0.5	1	0	0	0	0	0	0.75
160400	0	0.5	1	0	0	0	0	0	0
160800	0	0.5	1	0	0	0	0	0	0
161200	0	0.5	1	0	0	0.75	0	0	0
161600	0	0.5	1	0	0	0	0	0	0
162000	0	0.5	1	0	0	0.75	0	0	0
162400	0	0.5	1	0	0	0	0	0	0
162800	0	0.5	1	0	0	0	0	0	0.75
163200	0	0.5	1	0	0	0	0	0	0.75
163600	0	0.5	1	0	0	0	0	0	0
164000	0	0.5	1	0	0	0	0	0	0
164400	0	0.5	1	0	0	0	0	0	1
164800	0	0.5	1	0	0	0	0	0	0
165200	0	0.5	1	0	0	0	0	0	1
165600	0	0.5	1	0	0	1	0	0	0
166000	0	0.5	1	0	0	0.75	0	0	0
166400	0	0.5	1	0	0	0	0	0	0
166800	0	0.5	1	0	0	0	0	0	0
167200	0	0.5	1	0	0	0	0	0	0
167600	0	0.5	1	0	0	0	0	0	0
168000	0	0.5	1	0	0	0	0	0	0
168400	0	0.5	1	0	0	0	0	0	1
168800	0	0.5	1	0	1	1	0	0	0
169200	0	0.5	1	0	0	0	0	0	0
169600	0	0.5	1	0	0	0.75	0	0	0
170000	0	0.5	1	0	0	0	0	0	0
170400	0	0.5	1	0	0.5	1	0	0	0.75
170800	0	1	1	0	0	0	0	0	0
171200	0	0.5	1	0	0	0	0	0	0
171600	0	0.5	1	0	0	0.75	0	0	0.75
172000	0	0.5	1	0	0	1	0	0	0
172400	0	1	1	0	0	0	0	0	0
172800	0	0.5	1	0	0	0	0	0	0
173200	0	0.5	1	0	0	1	0	0	0
173600	0	0.5	1	0	0	0	0	0	0
174000	0	0.5	1	0	0	0	0	0	0
174400	0	0.5	1	0	0	1	0	0	0.75
174800	0	0.5	1	0	0	0	0	0	0.75
175200	0	0.5	1	0	0	0	0	0	0
175600	0	0.5	1	0	0	0	0	0.5	1
176000	0	0.5	1	0	0	0.75	0	0	0
176400	0	0.5	1	0	0	0	0	0	0
176800	0	0.5	1	0	0	1	0	0	0.75
177200	0	0.5	1	0	0	0	0	0	0
177600	0	1	1	0	0	0	0	0	0
178000	0	0.5	1	0	0	0	0	0	0.75
178400	0	0.5	1	0	0	0.75	0	0	0.75
178800	0	1	1	0	0	0.75	0	1	1
179200	0	1	1	0	0	0	0	0	0.75
179600	0	1	1	0	0	0	0	0	0
180000	0	0.5	1	0	0	0	0	0	0
180400	0	0.5	1	0	0	0	0	0	0
180800	0	1	1	0	0	0	0	0	0.75
181200	0	0.5	1	0	0	0	0	0	0
181600	0	1	1	0	0	0.75	0	0	0.75
182000	0	1	1	0	0	0	0	0	1
182400	0	0.5	1	0	0	0	0	0	0.75
182800	0	1	1	0	1	1	0	0	0
183200	0	1	1	0	0	0	0	0	0
183600	0	1	1	0	0	0	0	0	1
184000	0	0.5	1	0	0	0	0	0	0
184400	0	1	1	0	0	0	0	0	0.75
184800	0	1	1	0	0	0	0	0	0.75
185200	0	1	1	0	0	0.75	0	0	0
185600	0	1	1	0	0	0	0	0	0.75
186000	0.25	1	1	0	0	0	0	0	0
186400	0	1	1	0	0	0	0	0	0
186800	0	1	1	0	0	0	0	0	0.75
187200	0	1	1	0	0	0	0	0	0
187600	0	1	1	0	0	0	0	0	0.75
188000	0	1	1	0	0	0.75	0	0	0
188400	0	1	1	0	0	0	0	0	0
188800	0	1	1	0	0	0.75	0	0	0
189200	0	1	1	0	0	0	0	0	0
189600	0	1	1	0	0	0	0	0	0
190000	0.25	1	1	0	0	0	0	0	0
190400	0	1	1	0	0	0	0	0.5	1
190800	0	1	1	0	0	0	0	0	0
191200	0	1	1	0	0	0.75	0	0	0
191600	0	1	1	0	0	0	0	0	0
192000	0	1	1	0	0	0	0	0	0
192400	0	1	1	0	0	0	0	0	0
192800	0	1	1	0	0	0	0	0	0.75
193200	0.25	1	1	0	0	1	0	0	0
193600	0	1	1	0	0	0	0	0	0
194000	0.25	1	1	0	0	1	0	0	0.75
194400	0	1	1	0	0	0.75	0	0	0
194800	0.25	1	1	0	0	0	0	0	1
195200	0.25	1	1	0	0	0	0	0	0
195600	0.25	1	1	0	0	0	0	0	0
196000	0	1	1	0	0	0	0	0	0.75
196400	0	1	1	0	0	0	0	0	0
196800	0.25	1	1	0	0	0.75	0	0	0
197200	0	1	1	0	0	0	0	0	0.75
197600	0	1	1	0	0	0	0	0	0
198000	0.25	1	1	0	0	0	0	0	0
198400	0.25	1	1	0	0	0	0	0	0
198800	0.25	1	1	0	0	0	0	0	0
199200	0.25	1	1	0	0	0	0	0	0
199600	0.25	1	1	0	0	0.75	0	0	0
200000	0.25	1	1	0	0	0	0	0	0
200400	0.25	1	1	0	0.5	1	0	0	0
200800	0.25	1	1	0	0	0	0	0	1
201200	0.25	1	1	0	0	0.75	0	0	0.75
201600	0.25	1	1	0	0	1	0	0	0
202000	0.25	1	1	0	0	0.75	0	0	0
202400	0.25	1	1	0	0	0.75	0	0	0
202800	0.25	1	1	0	0	0.75	0	0	0
203200	0.25	1	1	0	0.5	1	0	0	0
203600	0.25	1	1	0	0	0	0	0	0
204000	0.25	1	1	0	0	0	0	0	1
204400	0.25	1	1	0	0	0.75	0	0	1
204800	0.25	1	1	0	0	1	0	0	0.75
205200	0.25	1	1	0	0	0	0	0	0
205600	0.25	1	1	0	0	0	0	0	0
206000	0.25	1	1	0	0	0	0	0	1
206400	0.25	1	1	0	0	0	0	0	0
206800	0.25	1	1	0	0	0	0	0	0
207200	0.25	1	1	0	0	0	0	0	1
207600	0.25	1	1	0	0	1	0	0	0
208000	0.25	1	1	0	0	1	0	0	0
208400	0.25	1	1	0	0	0	0	0	0
208800	0.25	1	1	0	0	0.75	0	0	0
209200	0.25	1	1	0	0	0	0	0	0
209600	0.25	1	1	0	0	0.75	0	0	0
210000	0.25	1	1	0	0.5	1	0	0	0.75
210400	0.25	1	1	0	0	0.75	0	0	0
210800	0.25	1	1	0	0	1	0	0	0.75
211200	1	1	1	0	0	0	0	0	0
211600	0.25	1	1	0	0	0	0	0.5	1
212000	0.25	1	1	0	0	0	0	0	0
212400	0.25	1	1	0	0	0	0	0	0
212800	0.25	1	1	0	0	1	0	0	0.75
213200	0.25	1	1	0	0	0	0	0	0
213600	0.25	1	1	0	0	1	0	0	0.75
214000	0.25	1	1	0	0	0	0	0	0
214400	0.25	1	1	0	0	0.75	0	0	0.75
214800	0.25	1	1	0	0	0.75	0	0	0
215200	0.25	1	1	0	0	0	0	0	0
215600	0.25	1	1	0	0	0.75	0	0	0
216000	0.25	1	1	0	0	0	0	0	0.75
216400	0.25	1	1	0	0	0	0	0	0
216800	0.25	1	1	0	0	0.75	0	0	0
217200	0.25	1	1	0	0	0	0	0	0
217600	0.25	1	1	0	0	0	0	0	0
218000	0.25	1	1	0	0	0	0	0	0
218400	0.25	1	1	0	0	0	0	0	0
218800	0.25	1	1	0	0	0	0	0	1
219200	0.25	1	1	0	0	0	0	0	1
219600	0.25	1	1	0	0	0	0	0	0
220000	0.25	1	1	0	0	1	0	0	1
220400	0.25	1	1	0	0	1	0	0	0.75
220800	0.25	1	1	0	0	1	0	0	0
221200	0.25	1	1	0	0	0	0	0	0
221600	0.25	1	1	0	0	0	0	0	0.75
222000	0.25	1	1	0	0	0.75	0	0	0
222400	0.25	1	1	0	0	0.75	0	0	0.75
222800	0.25	1	1	0	0	0	0	0	0
223200	0.25	1	1	0	0	0.75	0	0	0
223600	0.25	1	1	0	0	0	0	0	0
224000	0.25	1	1	0	0.5	1	0	1	1
224400	0.25	1	1	0	0	0	0	0	1
224800	0.25	1	1	0	0	0	0	0	0
225200	0.25	1	1	0	0	0	0	0	0
225600	0.25	1	1	0	0	0	0	0	0
226000	0.25	1	1	0	0	0	0	0	0
226400	0.25	1	1	0	0	0	0	0	0
226800	0.25	1	1	0	0	0.75	0	0	0
227200	0.25	1	1	0	0	0	0	0	0
227600	0.25	1	1	0	0	0	0	0	0.75
228000	0.25	1	1	0	0	0	0	0	0
228400	0.25	1	1	0	0	0	0	0	0.75
228800	0.25	1	1	0	0	0	0	0	0
229200	0.25	1	1	0	0	0	0	0	0.75
229600	0.25	1	1	0	0	0	0	0	0
230000	0.25	1	1	0	0	1	0	0	0
230400	0.25	1	1	0	0	0	0	0	1
230800	0.25	1	1	0	0	0	0	0	0
231200	0.25	1	1	0	0	1	0	0	0
231600	0.25	1	1	0	0	0	0	0	0.75
232000	1	1	1	0	0	0	0	0.5	1
232400	0.25	1	1	0	0	0	0	0	0
232800	0.25	1	1	0	0	0	0	0	1
233200	0.25	1	1	0	0	1	0	0	0.75
233600	0.25	1	1	0	0	0	0	0	0.75
234000	0.25	1	1	0	0	0	0	0	0
234400	0.25	1	1	0	0	0	0	0	0
234800	0.25	1	1	0	0	0	0	0	0.75
235200	0.25	1	1	0	0	0	0	0	0.75
235600	0.25	1	1	0	0	0	0	0	0
236000	0.25	1	1	0	0	0.75	0	0	0
236400	0.25	1	1	0	0	0	0	0	0.75
236800	0.25	1	1	0	0	0	0	0	0
237200	0.25	1	1	0	0	0	0	0	0
237600	0.25	1	1	0	0	0	0	0	0.75
238000	0.25	1	1	0	0	0.75	0	0	0
238400	0.25	1	1	0	0	0	0	0	0
238800	0.25	1	1	0	0.5	1	0	0	1
239200	0.25	1	1	0	0	0	0	0	0
239600	0.25	1	1	0	0	0	0	0	0
240000	0.25	1	1	0	0	0	0	0	1
240400	0.25	1	1	0	0	0	0	0	0
240800	0.25	1	1	0	0	0	0	0	0.75
241200	0.25	1	1	0	0	0	0	0	0
241600	0.25	1	1	0	0.5	1	0	0	0
242000	0.25	1	1	0	0	0.75	0	0	0
242400	0.25	1	1	0	1	1	0	0	0
242800	0.25	1	1	0	0	0	0	0	0.75
243200	0.25	1	1	0	0	0	0	0	0
243600	0.25	1	1	0	0	0	0	0	1
244000	0.25	1	1	0	0	0	0	0	0.75
244400	0.25	1	1	0	0	0	0	0	0
244800	0.25	1	1	0	0	0	0	0	0
245200	0.25	1	1	0	0	1	0	0	0
245600	0.25	1	1	0	0	0.75	0	0	0.75
246000	0.25	1	1	0	0	0	0	0	0.75
246400	0.25	1	1	0	0	0.75	0	0	0
246800	0.25	1	1	0	0	0	0	0	0.75
247200	0.25	1	1	0	0	0	0	0	0
247600	0.25	1	1	0	0	0	0	0	0
248000	0.25	1	1	0	0	0.75	0	0	1
248400	0.25	1	1	0	0	1	0	0	1
248800	0.25	1	1	0	0	0.75	0	0	0
249200	0.25	1	1	0	0	0.75	0	0	1
249600	0.25	1	1	0	0	0	0	0	0
250000	0.25	1	1	0	0	0	0	0	0
250400	0.25	1	1	0	0	0	0	0	0
250800	0.25	1	1	0	0	0	0	0	0
251200	0.25	1	1	0	0	0.75	0	0	1
251600	0.25	1	1	0	0	0.75	0	0	0
252000	0.25	1	1	0	0	0	0	0	0.75
252400	0.25	1	1	0	0	0.75	0	0	0
252800	0.25	1	1	0	0	0	0	0	0.75
253200	0.25	1	1	0	0	0	0	0	0
253600	0.25	1	1	0	0	0	0	0	0
254000	0.25	1	1	0	0	1	0	0	0
254400	0.25	1	1	0	0	0	0	0	0
254800	0.25	1	1	0	0	0.75	0	0	0.75
255200	0.25	1	1	0	0	0.75	0	0	0.75
255600	0.25	1	1	0	0	0.75	0	0	0
256000	0.25	1	1	0	0	0.75	0	0	0
256400	0.25	1	1	0	0	0.75	0	0	1
256800	0.25	1	1	0	0	0	0	0	1
257200	0.25	1	1	0	0	0	0	0	0
257600	0.25	1	1	0	0	1	0	0	1
258000	0.25	1	1	0	0	0	0	0	0.75
258400	0.25	1	1	0	0	0	0	0	0
258800	0.25	1	1	0	0	0	0	0	0
259200	0.25	1	1	0	0	0	0	0	0.75
259600	0.25	1	1	0	0	0	0	0	1
260000	1	1	1	0	0	0	0	0.5	1
260400	0.25	1	1	0	0	0	0	0	0
260800	0.25	1	1	0	0	0	0	0	0.75
261200	0.25	1	1	0	0	0	0	0	0
261600	0.25	1	1	0	0	0	0	0	0
262000	0.25	1	1	0	0	0	0	0	0.75
262400	0.25	1	1	0	0	0	0	0	0
262800	0.25	1	1	0	0	0	0	0	0.75
263200	0.25	1	1	0	0	0.75	0	0	0.75
263600	0.25	1	1	0	0	0	0	0	0
264000	0.25	1	1	0	0	0	0	0	0.75
264400	0.25	1	1	0	0	0.75	0	0	0
264800	0.25	1	1	0	0	0	0	0	0
265200	0.25	1	1	0	0	0	0	0	0
265600	0.25	1	1	0	0	0	0	0	0
266000	0.25	1	1	0	0	0	0	0	0
266400	0.25	1	1	0	0	0.75	0	0	0
266800	0.25	1	1	0	0	0	0	0	1
267200	0.25	1	1	0	0	0	0	0.5	1
267600	0.25	1	1	0	0	0	0	0	0
268000	0.25	1	1	0	0	0	0	0	0
268400	0.25	1	1	0	0	1	0	0	0
268800	0.25	1	1	0	0	0	0	0	0.75
269200	0.25	1	1	0	0	0.75	0	0	0
269600	1	1	1	0	0	0	0	0	0
270000	0.25	1	1	0	0	0	0	0	0
270400	0.25	1	1	0	0	0	0	0	0
270800	1	1	1	0	0	0	0	0	1
271200	0.25	1	1	0	0	0	0	0	0
271600	0.25	1	1	0	0	0	0	0	0.75
272000	1	1	1	0	1	1	0	0	0.75
272400	1	1	1	0	0	0	0	0	0
272800	1	1	1	0	0	0	0	0	0
273200	1	1	1	0	0	0	0	0	0
273600	0.25	1	1	0	0	1	0	0	0
274000	0.25	1	1	0	0	0	0	0	0
274400	1	1	1	0	0	0	0	0	0
274800	1	1	1	0	0	0	0	0	0
275200	1	1	1	0	0	0	0	0	0
275600	1	1	1	0	0	0	0	0	0.75
276000	1	1	1	0	0	0	0	0	0.75
276400	1	1	1	0	0	0.75	0	0	0
276800	1	1	1	0	0	0	0	0	1
277200	1	1	1	0	0	0	0	0	1
277600	1	1	1	0	0	0.75	1	1	1
278000	1	1	1	0	0	0	0	0	0.75
278400	1	1	1	0	0	0	0	0	0.75
278800	1	1	1	0	0	0	0	0	0.75
279200	1	1	1	0	0	0	0	0	1
279600	1	1	1	0	0	0.75	0	0	0
280000	1	1	1	0	0	0	0	0	1
280400	1	1	1	0	0	0	0	0	0
280800	1	1	1	0	0	0	0	0	0
281200	1	1	1	0	0	1	0	0	0
281600	1	1	1	0	0	0	0	0	0
282000	1	1	1	0	0	0.75	0	0	0
282400	1	1	1	0	0	1	0	0	0
282800	1	1	1	0	0	0.75	0	0	0
283200	1	1	1	0	0	1	0	0	0.75
283600	1	1	1	0	0	0	0	0	0
284000	1	1	1	0	0	0	0	0	1
284400	1	1	1	0	0.5	1	0	0	0
284800	1	1	1	0	0	0	0	0	0
285200	1	1	1	0	0	0	0	0.5	1
285600	1	1	1	0	0	0	0	0	0
286000	1	1	1	0	0	0.75	0	0	0
286400	1	1	1	0	0	0	0	0	0
286800	1	1	1	0	0	0	0	0	0
287200	1	1	1	0	0	0	0	0	0
287600	1	1	1	0	0	0	0	0	0
288000	1	1	1	0	0	0.75	0	0	0
288400	1	1	1	0	0	0	0	0	0
288800	1	1	1	0	0	0	0	0	0.75
289200	1	1	1	0	0	0	0	0	0
289600	1	1	1	0	0	0.75	0	0	0
290000	1	1	1	0	0	0	0	0	0
290400	1	1	1	0	0	0	0	0	0.75
290800	1	1	1	0	1	1	0	0	0
291200	1	1	1	0	0	0	0	0	0
291600	1	1	1	0	0	0.75	0	0	0
292000	1	1	1	0	0	0	0	0	0.75
292400	1	1	1	0	0	0	0	0	0
292800	1	1	1	0	0	0	0	0	0.75
293200	1	1	1	0	0	0	0	0	0
293600	1	1	1	0	0	1	0	0	0.75
294000	1	1	1	0	0	0	0	0	0
294400	1	1	1	0	0	0	0	0	0
294800	1	1	1	0	0	0	0	0	0
295200	1	1	1	0	0.5	1	0	0	0
295600	1	1	1	0	0	0	0	0	1
296000	1	1	1	0	0	0	0	0	0
296400	1	1	1	0	0	0	0	0	0
296800	1	1	1	0	0	0.75	0	0	0
297200	1	1	1	0	0	0	0	0	0
297600	1	1	1	0	0	0	0	0	1
298000	1	1	1	0	0	0.75	0	0	0
298400	1	1	1	0	0	0	0	0	1
298800	1	1	1	0	0	0	0	0	1
299200	1	1	1	0	0	0.75	0	0	0
299600	1	1	1	0	0	0	0	0	0
300000	1	1	1	0	0	0	0	0	0
300400	1	1	1	0	0	0.75	0	0	0
300800	1	1	1	0	0	0	0	0	0
301200	1	1	1	0	0	0.75	0	0	1
301600	1	1	1	0	0	0	0	0	0
302000	1	1	1	0	0	0	0	0	0
302400	1	1	1	0	0	0	0	0	0
302800	1	1	1	0	0	0	0	0	0
303200	1	1	1	0	0	1	0	0	1
303600	1	1	1	0	0	0	0	0	0
304000	1	1	1	0	0	0	0	0	0
304400	1	1	1	0	0	1	0	0	0
304800	1	1	1	0	0	0	0	0	0.75
305200	1	1	1	0	0	0	0	0	0
305600	1	1	1	0	0	0	0	0	0
306000	1	1	1	0	0	0	0	0	0.75
306400	1	1	1	0	0	0.75	0	0	0.75
306800	1	1	1	0	0	0.75	0	0	0
307200	1	1	1	0	0	0	0	0	1
307600	1	1	1	0	0	0	0	0	0
308000	1	1	1	0	0	0	0	0	1
308400	1	1	1	0	0	0	0	0	0
308800	1	1	1	0	0	0	0	0	0
309200	1	1	1	0	0	0.75	0	0	0
309600	1	1	1	0	0	0	0	0	0.75
310000	1	1	1	0	0	0.75	0	0	0
310400	1	1	1	0	0	1	0	0	0.75
310800	1	1	1	0	0	0.75	0	0	0.75
311200	1	1	1	0	0	0.75	0.25	1	1
311600	1	1	1	0	0	0	0	0	0
312000	1	1	1	0	0	0.75	0	0	0.75
312400	1	1	1	0	0	0.75	0	0	1
312800	1	1	1	0	0.5	1	0	0	0.75
313200	1	1	1	0	0	0	0	0	0
313600	1	1	1	0	0	0	0	0	0.75
314000	1	1	1	0	0	0	0	0	0
314400	1	1	1	0	0	0	0	0	0.75
314800	1	1	1	0	0	0	0	0	0
315200	1	1	1	0	0	1	0	0	0
315600	1	1	1	0	0	0	0	0	0
316000	1	1	1	0	0	0	0	0	1
316400	1	1	1	0	0	0	0	0	0
316800	1	1	1	0	0	0	0	0	0.75
317200	1	1	1	0	0	0	0	0	0
317600	1	1	1	0	0	0	0	0	0
318000	1	1	1	0	0	0	0	0	0
318400	1	1	1	0	0	0	0	0	0
318800	1	1	1	0	0	0.75	0	0	0
319200	1	1	1	0	0	0.75	0	0	0
319600	1	1	1	0	0	0	0	0	1
320000	1	1	1	0	0	0	0	0	0.75
320400	1	1	1	0	0	0.75	0	0	0
320800	1	1	1	0	0	0	0	0	0.75
321200	1	1	1	0	0	0	0	0	0
321600	1	1	1	0	0	0	0	0.5	1
322000	1	1	1	0	0	0	0	0	0
322400	1	1	1	0	0	0.75	0	0	0
322800	1	1	1	0	0	0	0	0.5	1
323200	1	1	1	0	0	0.75	0	0	0
323600	1	1	1	0	0	0	0	0	0
324000	1	1	1	0	0	1	0	0	1
324400	1	1	1	0	0	0	0	0	1
324800	1	1	1	0	0	0	0	0	0
325200	1	1	1	0	1	1	0	0	0
325600	1	1	1	0	0	0	0	0	0
326000	1	1	1	0	0	0	0	0	0
326400	1	1	1	0	0	0	0	0	0
326800	1	1	1	0	0	0	0	0	0.75
327200	1	1	1	0	0	0	0	0	0.75
327600	1	1	1	0	0	0	0	0	0
328000	1	1	1	0	0	0	0	0	0
328400	1	1	1	0	0	0	0	0	0
328800	1	1	1	0	0	0	0	0	1
329200	1	1	1	0	0	0	0	0	0
329600	1	1	1	0	0	0.75	0	0	0
330000	1	1	1	0	0	0	0	0	0.75
330400	1	1	1	0	0	0	0	0	0
330800	1	1	1	0	0	0.75	0	0	0.75
331200	1	1	1	0	0	0	0	0	0.75
331600	1	1	1	0	0	0	0	0	1
332000	1	1	1	0	0	0.75	0	0	0
332400	1	1	1	0	0	0	0	0	1
332800	1	1	1	0	0	0.75	0	0	0.75
333200	1	1	1	0	1	1	0	0	1
333600	1	1	1	0	0	0	0	0	0.75
334000	1	1	1	0	0	0	0	0	1
334400	1	1	1	0	0	0	0	0	1
334800	1	1	1	0	0	1	0	0	0.75
335200	1	1	1	0	0	0	0	0	1
335600	1	1	1	0	0	0.75	0	0	0.75
336000	1	1	1	0	0	0	0	0	0.75
336400	1	1	1	0	0	1	0	0	0.75
336800	1	1	1	0	0	0	0	0	0
337200	1	1	1	0	0	0.75	0	0	0
337600	1	1	1	0	0	0	0	0	0.75
338000	1	1	1	0	0	0	0	0	0
338400	1	1	1	0	0	0.75	0	0	0
338800	1	1	1	0	0	0	0	0	0
339200	1	1	1	0	0	0	0	0	1
339600	1	1	1	0	0	0	0	0	0
340000	1	1	1	0	0	0	0	0	0
340400	1	1	1	0	0	0.75	0	0	0.75
340800	1	1	1	0	0	0	0	0	0
341200	1	1	1	0	0	0	0	0	0.75
341600	1	1	1	0	0	0	0	0	0
342000	1	1	1	0	0	1	0	0	0.75
342400	1	1	1	0	0	0	0	0.5	1
342800	1	1	1	0	0	0.75	0	0	1
343200	1	1	1	0	0	0	0	0	0.75
343600	1	1	1	0	0	0	0	0	0.75
344000	1	1	1	0	0	0	0	0	1
344400	1	1	1	0	0	0	0	0	0
344800	1	1	1	0	0	0	0	0	0
345200	1	1	1	0	0	0	0	0	1
345600	1	1	1	0	0	1	0	0	0
346000	1	1	1	0	0	0.75	0	0	0
346400	1	1	1	0	0	1	0	0	0.75
346800	1	1	1	0	0	0	0	0	0
347200	1	1	1	0	0	0	0	0	0.75
347600	1	1	1	0	0	0.75	0	0	0
348000	1	1	1	0	0	0	0	0	0
348400	1	1	1	0	0	0.75	0	0	0.75
348800	1	1	1	0	0	0.75	0	0	0
349200	1	1	1	0	0	0	0	0.5	1
349600	1	1	1	0	0	0	0	0	0
350000	1	1	1	0	0	0	0	0	0
350400	1	1	1	0	0	0.75	0	0	0
350800	1	1	1	0	0	0.75	0	0	0
351200	1	1	1	0	0	0	0	0	0.75
351600	1	1	1	0	0	1	0	0	0
352000	1	1	1	0	0	0.75	0	0	0
352400	1	1	1	0	0	1	0	0	0.75
352800	1	1	1	0	0	0	0	0	0
353200	1	1	1	0	0	0.75	0	0	0.75
353600	1	1	1	0	0	0	0	0	0
354000	1	1	1	0	0	0	0	0	1
354400	1	1	1	0	0	0	0	0.5	1
354800	1	1	1	0	0	0	0	0	0
355200	1	1	1	0	0	0	0	0	1
355600	1	1	1	0	0	0	0	0	0
356000	1	1	1	0	0	0	0	0	0
356400	1	1	1	0	0	0	0	0	0.75
356800	1	1	1	0	0	0	0	0	0.75
357200	1	1	1	0	0	0	0	0.5	1
357600	1	1	1	0	0	0	0	0	1
358000	1	1	1	0	0	0	0	0	0
358400	1	1	1	0	0	0	0	0.5	1
358800	1	1	1	0	0	0.75	0	0	0
359200	1	1	1	0	0	1	0	0.5	1
359600	1	1	1	0	0	0	0	0	0
360000	1	1	1	0	0	0.75	0	0	0
360400	1	1	1	0	0	0	0	0	0
360800	1	1	1	0	0	0	0	0	0
361200	1	1	1	0	0	0	0	0	0.75
361600	1	1	1	0	0	0	0	0	0.75
362000	1	1	1	0	0	0	0	0	0.75
362400	1	1	1	0	1	1	0	0	1
362800	1	1	1	0	0	0	0	0	0
363200	1	1	1	0	0	0	0	0	0.75
363600	1	1	1	0	0	0	0	0	0
364000	1	1	1	0	0	0	0	0	0.75
364400	1	1	1	0	0	0.75	0	0	0.75
364800	1	1	1	0	0	0.75	0	0	1
365200	1	1	1	0	0	0	0	0	0.75
365600	1	1	1	0	0	0	0	0	0.75
366000	1	1	1	0	0	1	0	0	0.75
366400	1	1	1	0	0	0.75	0	0.5	1
366800	1	1	1	0	0	0.75	0	0	0
367200	1	1	1	0	0	0.75	0	0.5	1
367600	1	1	1	0	0	0	0	0	0
368000	1	1	1	0	0	0.75	0	0.5	1
368400	1	1	1	0	0	0.75	0	0	0
368800	1	1	1	0	0	0.75	0	0	1
369200	1	1	1	0	0	1	0	0	0
369600	1	1	1	0	0	0	0	0	0
370000	1	1	1	0	0	0.75	0	0	1
370400	1	1	1	0	0	0	0	0	0
370800	1	1	1	0	0	0	0	0	0
371200	1	1	1	0	0	0.75	0	0	0
371600	1	1	1	0	0	0.75	0	0	0
372000	1	1	1	0	0	0	0	0	0
372400	1	1	1	0	0	1	0	0	0
372800	1	1	1	0	0	0.75	0	0	0
373200	1	1	1	0	0	0	0	0	0
373600	1	1	1	0	0	0	0	0	1
374000	1	1	1	0	0	0.75	0	0	0.75
374400	1	1	1	0	0	0	0	0	0
374800	1	1	1	0	0	1	0	0	0
375200	1	1	1	0	0	0	0	0	0.75
375600	1	1	1	0	0	0.75	0	0	1
376000	1	1	1	0	0	0	0	0	0
376400	1	1	1	0	0	1	0	0	0
376800	1	1	1	0	0	0	0	0.5	1
377200	1	1	1	0	0	0	0	0	0
377600	1	1	1	0	0	0	0	0	1
378000	1	1	1	0	0	0	0	0	1
378400	1	1	1	0	0	0	0	0	0
378800	1	1	1	0	0	0	0	0	0
379200	1	1	1	0	0	0.75	0	0	0.75
379600	1	1	1	0	0	0.75	0	0	0.75
380000	1	1	1	0	0	0.75	0	0	0
380400	1	1	1	0	0	0	0	0	0
380800	1	1	1	0	0	0	0	0	0
381200	1	1	1	0	0	0.75	0	0	0
381600	1	1	1	0	0	0	0	0	0.75
382000	1	1	1	0	0	0.75	0	0	0
382400	1	1	1	0	0	0.75	0	0	0.75
382800	1	1	1	0	0	0	0	0	1
383200	1	1	1	0	0	0.75	0	0	0.75
383600	1	1	1	0	0	0	0	0	0.75
384000	1	1	1	0	0	0	0	0	0
384400	1	1	1	0	0	0	0	0	0
384800	1	1	1	0	0	0	0	0	0.75
385200	1	1	1	0	0	0	0	0	0.75
385600	1	1	1	0	0	0.75	0	0	0.75
386000	1	1	1	0	0	0	0	0	0.75
386400	1	1	1	0	0	0	0	0	0.75
386800	1	1	1	0	0	0	0	0	1
387200	1	1	1	0	0	0	0	0	1
387600	1	1	1	0	0	0	0	0	0
388000	1	1	1	0	0	0	0	0	0.75
388400	1	1	1	0	0	0.75	0	0	0.75
388800	1	1	1	0	0	0.75	0	0	0
389200	1	1	1	0	0	0.75	0	0	0
389600	1	1	1	0	0	0.75	0	0	1
390000	1	1	1	0	0	0	0	0.5	1
390400	1	1	1	0	0	0	0	0	0.75
390800	1	1	1	0	0	1	0	0	0
391200	1	1	1	0	0	0.75	0	0	0
391600	1	1	1	0	0	0	0	0	0
392000	1	1	1	0	0	1	0	0	0.75
392400	1	1	1	0	0	0	0	0	1
392800	1	1	1	0	0	0	0	0	0
393200	1	1	1	0	0	0	0	0	0
393600	1	1	1	0	0	0	0	0	0
394000	1	1	1	0	0	1	0	0	1
394400	1	1	1	0	0	0	0	0	0.75
394800	1	1	1	0	0	0	0	0	0
395200	1	1	1	0	0	0.75	0	0	0
395600	1	1	1	0	0	0.75	0	0	1
396000	1	1	1	0	0	0	0	0	0
396400	1	1	1	0	0	0.75	0	0	0
396800	1	1	1	0	0	1	0	0	0
397200	1	1	1	0	0	0	0	0	0
397600	1	1	1	0	0	0.75	0	0	0
398000	1	1	1	0	0	0	0	0	0.75
398400	1	1	1	0	0	0	0	0	1
398800	1	1	1	0	0	0	0	0	0
399200	1	1	1	0	0	0	0	0	0.75
399600	1	1	1	0	0	0.75	0	0	1
400000	1	1	1	0	0	0	0	0	0

## Sheet: final percentiles
0	0	0	0	0	0	0	0	0	0
400	0	0	0	0	0	0	0	0	0
800	0	0	0	0	0	0.5	0	0	0
1200	0	0	0	0	0	0.333333	0	0	0
1600	0	0	0	0	0	0.25	0	0	0
2000	0	0	0	0	0	0.2	0	0	0
2400	0	0	0	0	0	0.166667	0	0	0
2800	0	0	0	0	0	0.142857	0	0	0
3200	0	0	0	0	0	0.125	0	0	0
3600	0	0	0	0	0.0555556	0.222222	0	0	0
4000	0	0	0	0	0.05	0.275	0	0	0
4400	0	0	0	0	0.05	0.275	0	0	0
4800	0	0	0	0	0.05	0.25	0	0	0
5200	0	0	0	0	0.05	0.25	0	0	0
5600	0	0	0	0	0.05	0.25	0	0	0
6000	0	0	0	0	0.05	0.25	0	0	0
6400	0	0	0	0	0.05	0.35	0	0	0
6800	0	0	0	0	0.05	0.45	0	0	0
7200	0	0	0	0	0.05	0.525	0	0	0
7600	0	0	0	0	0	0.425	0	0	0
8000	0	0	0	0	0	0.425	0	0	0
8400	0	0	0	0	0	0.5	0	0	0
8800	0	0	0	0	0	0.425	0	0	0
9200	0	0	0	0	0	0.5	0	0	0
9600	0	0	0	0	0	0.5	0	0	0
10000	0	0	0	0	0	0.5	0	0	0
10400	0	0	0	0	0	0.475	0	0	0
10800	0	0	0	0	0	0.375	0	0	0
11200	0	0	0	0	0	0.375	0	0	0
11600	0	0	0	0	0	0.45	0	0	0.075
12000	0	0	0	0	0	0.375	0	0	0.15
12400	0	0	0	0	0	0.3	0	0	0.15
12800	0	0	0	0	0	0.375	0	0	0.15
13200	0	0	0	0	0	0.3	0	0	0.15
13600	0	0	0	0	0	0.3	0	0	0.15
14000	0	0	0	0	0	0.375	0	0	0.15
14400	0	0	0	0	0	0.375	0	0	0.15
14800	0	0	0	0	0	0.45	0	0	0.15
15200	0	0	0	0	0	0.375	0	0	0.15
15600	0	0	0	0	0	0.3	0	0	0.075
16000	0	0	0	0	0	0.3	0	0	0
16400	0	0	0	0	0	0.375	0	0	0
16800	0	0	0	0	0	0.3	0	0	0
17200	0	0	0	0	0	0.4	0	0	0
17600	0	0	0	0	0	0.475	0	0	0
18000	0	0	0	0	0	0.5	0	0	0
18400	0	0	0	0	0	0.425	0	0	0
18800	0	0	0	0	0	0.425	0	0	0.075
19200	0	0	0	0	0	0.425	0	0	0.075
19600	0	0	0	0	0.05	0.525	0	0	0.075
20000	0	0	0	0	0.05	0.625	0	0	0.075
20400	0	0	0	0	0.05	0.55	0	0	0.075
20800	0	0	0	0	0.05	0.65	0	0	0.075
21200	0	0	0	0	0.05	0.55	0	0	0.075
21600	0	0	0	0	0.05	0.575	0	0	0.15
22000	0	0	0	0	0.05	0.475	0	0	0.225
22400	0	0	0	0	0.05	0.475	0	0	0.225
22800	0	0	0	0	0.05	0.4	0	0	0.25
23200	0	0	0	0	0.05	0.4	0	0	0.25
23600	0	0	0	0	0	0.3	0	0	0.25
24000	0	0	0	0	0	0.2	0	0	0.25
24400	0	0	0	0	0	0.2	0	0	0.25
24800	0	0	0	0	0	0.1	0	0	0.25
25200	0	0	0	0	0	0.175	0	0	0.325
25600	0	0	0	0	0	0.15	0	0	0.25
26000	0	0	0	0	0	0.15	0	0	0.175
26400	0	0	0	0	0	0.15	0	0	0.175
26800	0	0	0	0	0	0.15	0	0	0.075
27200	0	0	0	0	0.05	0.25	0	0	0.15
27600	0	0	0	0	0.05	0.25	0	0	0.15
28000	0	0	0	0	0.05	0.35	0	0	0.225
28400	0	0	0	0	0.15	0.45	0	0	0.325
28800	0	0	0	0	0.15	0.45	0	0	0.4
29200	0	0	0	0	0.15	0.45	0	0	0.425
29600	0	0	0	0	0.15	0.375	0	0	0.425
30000	0	0	0	0	0.15	0.475	0	0	0.425
30400	0	0	0	0	0.15	0.55	0	0	0.425
30800	0	0	0	0	0.15	0.625	0	0	0.5
31200	0	0	0	0	0.1	0.525	0	0	0.425
31600	0	0	0	0	0.1	0.525	0	0	0.425
32000	0	0	0	0	0.1	0.5	0	0	0.35
32400	0	0	0	0	0	0.475	0	0	0.25
32800	0	0	0	0	0	0.475	0	0	0.175
33200	0	0	0	0	0	0.4	0	0	0.075
33600	0	0	0	0	0	0.4	0	0	0.075
34000	0	0	0	0	0	0.4	0	0	0.075
34400	0	0	0	0	0	0.4	0	0	0.075
34800	0	0	0	0	0	0.325	0	0	0
35200	0	0	0	0	0	0.325	0	0	0
35600	0	0	0	0	0	0.425	0	0	0
36000	0	0	0	0	0	0.35	0	0	0.1
36400	0	0	0	0	0	0.275	0	0	0.2
36800	0	0	0	0	0	0.35	0	0	0.2
37200	0	0	0	0	0	0.425	0	0	0.2
37600	0	0	0	0	0	0.5	0	0	0.2
38000	0	0	0	0	0	0.5	0	0	0.275
38400	0	0	0	0	0	0.425	0	0	0.275
38800	0	0	0	0	0	0.525	0	0	0.275
39200	0	0	0	0	0	0.525	0	0	0.35
39600	0	0	0	0	0	0.425	0	0	0.35
40000	0	0	0	0	0	0.5	0	0	0.25
40400	0	0	0	0	0	0.5	0	0	0.15
40800	0	0	0	0	0	0.5	0	0	0.15
41200	0	0	0	0	0	0.5	0	0	0.15
41600	0	0	0	0	0	0.425	0	0	0.15
42000	0	0	0	0	0	0.325	0	0	0.15
42400	0	0	0	0	0	0.325	0	0	0.225
42800	0	0	0	0	0	0.225	0	0	0.225
43200	0	0	0	0	0	0.225	0	0	0.15
43600	0	0	0	0	0	0.3	0	0	0.15
44000	0	0	0	0	0	0.325	0	0	0.15
44400	0	0	0	0	0	0.4	0	0	0.15
44800	0	0	0	0	0	0.4	0	0	0.15
45200	0	0	0	0	0	0.4	0	0	0.15
45600	0	0	0	0	0	0.4	0	0	0.15
46000	0	0	0	0	0	0.4	0	0	0.075
46400	0	0	0	0	0	0.4	0	0	0
46800	0	0	0	0	0	0.4	0	0	0
47200	0	0	0	0	0	0.4	0	0	0
47600	0	0	0	0	0	0.425	0	0	0.1
48000	0	0	0	0	0	0.4	0	0	0.2
48400	0	0	0	0	0	0.325	0	0	0.275
48800	0	0	0	0	0	0.25	0	0	0.35
49200	0	0	0	0	0	0.175	0	0	0.425
49600	0	0	0	0	0	0.175	0	0	0.5
50000	0	0	0	0	0	0.175	0	0	0.5
50400	0	0	0	0	0	0.175	0	0	0.5
50800	0	0	0	0	0	0.175	0	0	0.5
51200	0	0	0	0	0	0.25	0	0	0.5
51600	0	0	0	0	0	0.225	0	0	0.4
52000	0	0	0	0	0	0.15	0	0	0.375
52400	0	0	0	0	0	0.15	0	0	0.3
52800	0	0	0	0	0	0.15	0	0	0.225
53200	0	0	0	0	0	0.15	0	0	0.15
53600	0	0	0	0	0	0.225	0	0	0.15
54000	0	0	0	0	0	0.225	0	0	0.225
54400	0	0	0	0	0	0.225	0	0	0.225
54800	0	0	0	0	0	0.225	0	0	0.225
55200	0	0	0	0	0	0.15	0	0	0.3
55600	0	0	0	0	0	0.175	0	0	0.375
56000	0	0	0	0	0	0.175	0	0	0.3
56400	0	0	0	0	0	0.175	0	0	0.3
56800	0	0	0	0	0	0.25	0	0	0.3
57200	0	0	0	0	0	0.325	0	0	0.375
57600	0	0	0	0	0	0.25	0	0	0.375
58000	0	0	0	0	0	0.325	0	0.1	0.4
58400	0	0	0	0	0	0.4	0	0.1	0.4
58800	0	0	0	0	0	0.4	0	0.1	0.475
59200	0	0	0	0	0	0.4	0	0.1	0.5
59600	0	0	0	0	0	0.3	0	0.1	0.425
60000	0	0	0	0	0	0.4	0	0.1	0.425
60400	0	0	0	0	0	0.4	0	0.1	0.425
60800	0	0	0	0	0	0.325	0	0.1	0.425
61200	0	0	0	0	0	0.25	0	0.1	0.35
61600	0	0	0	0	0	0.35	0	0.1	0.275
62000	0	0	0	0	0	0.275	0	0	0.275
62400	0	0	0	0	0	0.2	0	0	0.275
62800	0	0	0	0	0.05	0.3	0	0	0.3
63200	0	0	0	0	0.1	0.4	0	0	0.2
63600	0	0	0	0	0.1	0.4	0	0	0.275
64000	0	0	0	0	0.1	0.3	0	0	0.275
64400	0	0	0	0	0.1	0.3	0	0	0.275
64800	0	0	0	0	0.1	0.3	0	0	0.275
65200	0	0	0	0	0.1	0.3	0	0	0.375
65600	0	0	0	0	0.1	0.2	0	0	0.45
66000	0	0	0	0	0.1	0.275	0	0	0.35
66400	0	0	0	0	0.1	0.275	0	0	0.35
66800	0	0	0	0	0.05	0.175	0	0	0.25
67200	0	0	0	0	0	0.075	0	0.1	0.35
67600	0	0	0	0	0	0.075	0	0.1	0.375
68000	0	0	0	0	0	0.075	0	0.1	0.375
68400	0	0	0	0	0	0.075	0	0.1	0.475
68800	0	0	0	0	0	0.15	0	0.15	0.575
69200	0	0	0	0	0	0.15	0	0.15	0.475
69600	0	0	0	0	0	0.15	0	0.15	0.4
70000	0	0	0	0	0	0.15	0	0.15	0.4
70400	0	0	0	0	0	0.15	0	0.15	0.5
70800	0	0	0	0	0	0.15	0	0.15	0.5
71200	0	0	0	0	0	0.15	0	0.05	0.4
71600	0	0	0	0	0	0.225	0	0.05	0.3
72000	0	0	0	0	0	0.225	0	0.05	0.3
72400	0	0	0	0	0	0.225	0	0.05	0.2
72800	0	0	0	0	0	0.225	0	0	0.175
73200	0	0	0	0	0	0.225	0	0	0.25
73600	0	0	0	0	0	0.3	0	0	0.25
74000	0	0	0	0	0	0.225	0	0	0.25
74400	0	0	0	0	0	0.225	0	0	0.15
74800	0	0	0	0	0	0.3	0	0	0.15
75200	0	0	0	0	0	0.3	0	0	0.15
75600	0	0	0	0	0.05	0.325	0	0	0.25
76000	0	0	0	0	0.05	0.325	0	0	0.325
76400	0	0	0	0	0.05	0.325	0	0	0.4
76800	0	0	0	0	0.05	0.325	0	0	0.4
77200	0	0	0	0	0.05	0.325	0	0	0.4
77600	0	0	0	0	0.05	0.25	0	0	0.5
78000	0	0	0	0	0.05	0.25	0	0	0.575
78400	0	0	0	0	0.05	0.325	0	0	0.575
78800	0	0	0	0	0.05	0.325	0	0	0.575
79200	0	0	0	0	0.05	0.325	0	0	0.675
79600	0	0	0	0	0	0.225	0	0	0.575
80000	0	0	0	0	0	0.225	0	0	0.5
80400	0	0	0	0	0.05	0.325	0	0	0.425
80800	0	0	0.075	0	0.05	0.25	0	0	0.35
81200	0	0	0.15	0	0.05	0.25	0	0	0.275
81600	0	0	0.15	0	0.15	0.35	0	0	0.175
82000	0	0	0.15	0	0.15	0.35	0	0	0.1
82400	0	0	0.225	0	0.15	0.275	0	0	0.175
82800	0	0	0.225	0	0.15	0.2	0	0	0.175
83200	0	0	0.3	0	0.15	0.2	0	0	0.075
83600	0	0	0.3	0	0.15	0.2	0	0	0.075
84000	0	0	0.375	0	0.15	0.2	0	0	0.175
84400	0	0	0.45	0	0.1	0.1	0	0	0.175
84800	0	0	0.375	0	0.1	0.1	0	0	0.25
85200	0	0	0.3	0	0.1	0.175	0	0	0.25
85600	0	0	0.3	0	0	0.15	0	0	0.325
86000	0	0	0.375	0	0	0.15	0	0	0.325
86400	0	0	0.375	0	0	0.15	0	0	0.25
86800	0	0	0.45	0	0	0.15	0	0	0.25
87200	0	0.05	0.475	0	0	0.15	0	0	0.25
87600	0	0.05	0.475	0	0	0.225	0	0	0.25
88000	0	0.05	0.5	0	0	0.225	0	0	0.225
88400	0	0.05	0.425	0	0	0.3	0	0	0.225
88800	0	0.05	0.425	0	0	0.4	0	0	0.15
89200	0	0.05	0.5	0	0	0.325	0	0	0.225
89600	0	0.05	0.6	0	0	0.25	0	0	0.15
90000	0	0.05	0.6	0	0	0.25	0	0	0.15
90400	0	0.05	0.625	0	0	0.25	0	0	0.15
90800	0	0.05	0.65	0	0	0.25	0	0	0.15
91200	0	0	0.65	0	0	0.25	0	0	0.225
91600	0	0	0.725	0	0	0.25	0	0	0.225
92000	0	0	0.7	0	0	0.25	0	0	0.15
92400	0	0	0.8	0	0	0.175	0	0	0.15
92800	0	0	0.9	0	0	0.075	0	0	0.15
93200	0	0	0.925	0	0	0.15	0	0	0.15
93600	0	0	0.925	0	0	0.15	0	0	0.225
94000	0	0	0.95	0	0	0.15	0	0	0.225
94400	0	0	0.95	0	0	0.15	0	0	0.225
94800	0	0	0.95	0	0	0.15	0	0	0.225
95200	0	0	0.95	0	0	0.15	0	0	0.25
95600	0	0	0.975	0	0	0.075	0	0	0.35
96000	0	0	1	0	0	0.075	0	0	0.35
96400	0	0	1	0	0	0.075	0	0	0.35
96800	0	0	0.975	0	0	0.075	0	0	0.425
97200	0	0	0.975	0	0	0	0	0	0.35
97600	0	0	0.975	0	0	0	0	0	0.35
98000	0	0	0.975	0	0	0	0	0	0.425
98400	0	0	0.975	0	0	0.075	0	0	0.425
98800	0	0	0.975	0	0	0.15	0	0	0.425
99200	0	0	0.975	0	0	0.15	0	0	0.325
99600	0	0	0.975	0	0	0.15	0	0	0.225
100000	0	0	0.975	0	0	0.225	0	0	0.225
100400	0	0	0.975	0	0	0.225	0	0	0.225
100800	0	0	1	0	0	0.3	0	0	0.15
101200	0	0	1	0	0	0.3	0	0	0.15
101600	0	0	1	0	0	0.375	0	0	0.175
102000	0	0	1	0	0	0.475	0	0	0.1
102400	0	0	1	0	0	0.4	0	0	0.1
102800	0	0	1	0	0	0.325	0	0	0.1
103200	0	0	1	0	0	0.325	0	0	0.175
103600	0	0	1	0	0	0.325	0	0	0.175
104000	0	0	1	0	0	0.25	0	0	0.175
104400	0	0	1	0	0	0.25	0	0	0.275
104800	0	0	1	0	0	0.175	0	0	0.275
105200	0	0	1	0	0	0.175	0	0	0.35
105600	0	0	1	0	0	0.1	0	0	0.25
106000	0	0	1	0	0	0	0	0	0.25
106400	0	0	1	0	0	0	0	0	0.325
106800	0	0	1	0	0	0	0	0	0.325
107200	0	0	1	0	0	0	0	0	0.25
107600	0	0	1	0	0	0	0	0	0.35
108000	0	0	1	0	0	0	0	0	0.35
108400	0	0	1	0	0	0	0	0	0.325
108800	0	0	1	0	0	0.1	0	0	0.325
109200	0	0	1	0	0	0.1	0	0	0.35
109600	0	0.05	1	0	0	0.1	0	0	0.45
110000	0	0.05	1	0	0	0.1	0	0.05	0.55
110400	0	0.05	1	0	0	0.175	0	0.1	0.575
110800	0	0.05	1	0	0	0.25	0	0.1	0.675
111200	0	0.05	1	0	0	0.325	0	0.1	0.675
111600	0	0.05	1	0	0	0.325	0	0.1	0.575
112000	0	0.05	1	0	0	0.325	0	0.1	0.575
112400	0	0.05	1	0	0	0.325	0	0.1	0.575
112800	0	0.05	1	0	0	0.225	0	0.1	0.575
113200	0	0.05	1	0	0	0.325	0	0.15	0.575
113600	0	0	1	0	0	0.325	0	0.15	0.55
114000	0	0	1	0	0	0.325	0	0.1	0.45
114400	0	0	1	0	0	0.25	0	0.05	0.35
114800	0	0	1	0	0	0.25	0	0.1	0.35
115200	0	0	1	0	0	0.175	0	0.1	0.35
115600	0	0	1	0	0	0.175	0	0.1	0.35
116000	0	0	1	0	0	0.175	0	0.2	0.45
116400	0	0	1	0	0	0.175	0	0.25	0.475
116800	0	0.05	1	0	0	0.175	0	0.25	0.475
117200	0	0.05	1	0	0	0.075	0	0.2	0.45
117600	0	0.05	1	0	0	0.15	0	0.2	0.375
118000	0	0.05	1	0	0	0.225	0	0.2	0.475
118400	0	0.05	1	0	0	0.3	0	0.25	0.575
118800	0	0.1	1	0	0	0.225	0	0.25	0.575
119200	0	0.1	1	0	0	0.225	0	0.25	0.575
119600	0	0.1	1	0	0	0.225	0	0.25	0.575
120000	0	0.1	1	0	0	0.3	0	0.15	0.55
120400	0	0.15	1	0	0	0.375	0	0.1	0.525
120800	0	0.15	1	0	0.1	0.475	0	0.1	0.525
121200	0	0.15	1	0	0.1	0.55	0	0.1	0.45
121600	0	0.15	1	0	0.1	0.55	0	0.1	0.45
122000	0	0.15	1	0	0.1	0.475	0	0.1	0.35
122400	0	0.15	1	0	0.1	0.4	0	0.05	0.25
122800	0	0.1	1	0	0.1	0.475	0	0.05	0.25
123200	0	0.1	1	0	0.1	0.575	0	0.05	0.25
123600	0	0.1	1	0	0.1	0.575	0	0.05	0.25
124000	0	0.1	1	0	0.1	0.5	0	0.05	0.175
124400	0	0.05	1	0	0.1	0.5	0	0.05	0.1
124800	0	0	1	0	0	0.4	0	0.05	0.1
125200	0	0	1	0	0	0.425	0	0.05	0.1
125600	0	0	1	0	0	0.35	0	0.05	0.1
126000	0	0	1	0	0	0.35	0	0.05	0.1
126400	0	0	1	0	0	0.45	0	0.05	0.1
126800	0	0	1	0	0	0.375	0	0	0.1
127200	0	0	1	0	0	0.35	0	0	0.2
127600	0	0	1	0	0	0.35	0	0	0.2
128000	0	0	1	0	0	0.35	0	0	0.2
128400	0	0.05	1	0	0	0.275	0	0	0.2
128800	0	0.05	1	0	0	0.275	0	0	0.2
129200	0	0.05	1	0	0	0.175	0	0.05	0.3
129600	0	0.05	1	0	0	0.175	0	0.05	0.3
130000	0	0.05	1	0	0	0.175	0	0.05	0.3
130400	0	0.1	1	0	0	0.075	0	0.05	0.3
130800	0	0.1	1	0	0	0.15	0	0.05	0.2
131200	0	0.1	1	0	0	0.175	0	0.05	0.1
131600	0	0.1	1	0	0	0.175	0	0.05	0.1
132000	0	0.1	1	0	0	0.175	0	0.05	0.1
132400	0	0.05	1	0	0	0.175	0	0.05	0.1
132800	0	0.05	1	0	0.1	0.275	0	0.05	0.2
133200	0	0.05	1	0	0.1	0.275	0	0	0.1
133600	0	0.05	1	0	0.1	0.275	0	0	0.1
134000	0	0.1	1	0	0.1	0.275	0	0.05	0.2
134400	0	0.1	1	0	0.1	0.275	0	0.05	0.2
134800	0	0.15	1	0	0.1	0.2	0	0.05	0.3
135200	0	0.15	1	0	0.1	0.1	0	0.05	0.3
135600	0	0.15	1	0	0.1	0.1	0	0.05	0.3
136000	0	0.15	1	0	0.1	0.1	0	0.05	0.3
136400	0	0.2	1	0	0.1	0.1	0	0.05	0.3
136800	0	0.25	1	0	0	0	0	0.05	0.2
137200	0	0.25	1	0	0	0.1	0	0.05	0.2
137600	0	0.3	1	0	0	0.1	0	0.05	0.2
138000	0	0.25	1	0	0	0.1	0	0	0.1
138400	0	0.3	1	0	0	0.1	0	0	0.1
138800	0	0.3	1	0	0	0.1	0	0.05	0.1
139200	0	0.4	1	0	0	0.1	0	0.1	0.2
139600	0	0.45	1	0	0	0.1	0	0.1	0.2
140000	0	0.5	1	0	0	0.1	0	0.1	0.275
140400	0	0.55	1	0	0	0.1	0	0.1	0.275
140800	0	0.55	1	0	0	0.1	0	0.1	0.275
141200	0	0.6	1	0	0	0	0	0.1	0.375
141600	0	0.6	1	0	0	0.075	0	0.1	0.375
142000	0	0.65	1	0	0	0.075	0	0.1	0.45
142400	0	0.6	1	0	0	0.075	0	0.1	0.45
142800	0	0.6	1	0	0.1	0.175	0	0.05	0.35
143200	0	0.55	1	0	0.1	0.175	0	0	0.25
143600	0	0.55	1	0	0.1	0.175	0	0	0.35
144000	0	0.55	1	0	0.1	0.275	0	0	0.275
144400	0	0.5	1	0	0.1	0.35	0	0	0.275
144800	0	0.5	1	0	0.1	0.35	0	0	0.275
145200	0	0.5	1	0	0.1	0.35	0	0	0.175
145600	0	0.55	1	0	0.1	0.35	0	0	0.175
146000	0	0.6	1	0	0.1	0.35	0	0	0.2
146400	0	0.65	1	0	0.1	0.35	0	0	0.2
146800	0	0.7	1	0	0	0.325	0	0	0.3
147200	0	0.75	1	0	0	0.325	0	0	0.3
147600	0	0.8	1	0	0	0.325	0	0	0.2
148000	0	0.85	1	0	0	0.225	0	0	0.2
148400	0	0.9	1	0	0	0.15	0	0.1	0.3
148800	0	0.95	1	0	0	0.225	0	0.1	0.3
149200	0	1	1	0	0	0.225	0	0.1	0.3
149600	0	1	1	0	0	0.225	0	0.1	0.4
150000	0	1	1	0	0	0.3	0	0.1	0.4
150400	0	0.95	1	0	0	0.3	0	0.1	0.4
150800	0	0.95	1	0	0	0.225	0	0.1	0.3
151200	0	0.95	1	0	0	0.225	0	0.1	0.4
151600	0	0.95	1	0	0	0.3	0	0.1	0.5
152000	0	0.95	1	0	0	0.3	0	0.1	0.5
152400	0	0.95	1	0	0	0.375	0	0	0.4
152800	0	0.95	1	0	0	0.3	0	0	0.475
153200	0	0.95	1	0	0	0.4	0	0	0.475
153600	0	0.95	1	0	0	0.325	0	0	0.45
154000	0	0.95	1	0	0	0.25	0	0	0.35
154400	0	1	1	0	0	0.35	0	0.05	0.45
154800	0	1	1	0	0	0.35	0	0.05	0.45
155200	0	1	1	0	0	0.45	0	0.05	0.35
155600	0	0.95	1	0	0	0.375	0	0.05	0.325
156000	0	0.9	1	0	0	0.375	0	0.05	0.325
156400	0	0.85	1	0	0	0.3	0	0.05	0.325
156800	0	0.8	1	0	0	0.375	0	0.05	0.25
157200	0	0.75	1	0	0	0.275	0	0.05	0.25
157600	0	0.7	1	0	0	0.275	0	0.05	0.175
158000	0	0.65	1	0	0	0.375	0	0.05	0.25
158400	0	0.6	1	0	0	0.275	0	0	0.15
158800	0	0.55	1	0	0	0.375	0	0	0.15
159200	0	0.5	1	0	0	0.275	0	0	0.15
159600	0	0.5	1	0	0	0.275	0	0	0.15
160000	0	0.5	1	0	0	0.275	0	0	0.225
160400	0	0.5	1	0	0	0.275	0	0	0.225
160800	0	0.5	1	0	0	0.2	0	0	0.225
161200	0	0.5	1	0	0	0.275	0	0	0.225
161600	0	0.5	1	0	0	0.275	0	0	0.225
162000	0	0.5	1	0	0	0.25	0	0	0.15
162400	0	0.5	1	0	0	0.25	0	0	0.15
162800	0	0.5	1	0	0	0.15	0	0	0.225
163200	0	0.5	1	0	0	0.15	0	0	0.3
163600	0	0.5	1	0	0	0.15	0	0	0.225
164000	0	0.5	1	0	0	0.15	0	0	0.15
164400	0	0.5	1	0	0	0.15	0	0	0.25
164800	0	0.5	1	0	0	0.15	0	0	0.25
165200	0	0.5	1	0	0	0.075	0	0	0.35
165600	0	0.5	1	0	0	0.175	0	0	0.35
166000	0	0.5	1	0	0	0.175	0	0	0.35
166400	0	0.5	1	0	0	0.175	0	0	0.35
166800	0	0.5	1	0	0	0.175	0	0	0.275
167200	0	0.5	1	0	0	0.175	0	0	0.2
167600	0	0.5	1	0	0	0.175	0	0	0.2
168000	0	0.5	1	0	0	0.175	0	0	0.2
168400	0	0.5	1	0	0	0.175	0	0	0.2
168800	0	0.5	1	0	0.1	0.275	0	0	0.2
169200	0	0.5	1	0	0.1	0.275	0	0	0.1
169600	0	0.5	1	0	0.1	0.25	0	0	0.1
170000	0	0.5	1	0	0.1	0.175	0	0	0.1
170400	0	0.5	1	0	0.15	0.275	0	0	0.175
170800	0	0.55	1	0	0.15	0.275	0	0	0.175
171200	0	0.55	1	0	0.15	0.275	0	0	0.175
171600	0	0.55	1	0	0.15	0.35	0	0	0.25
172000	0	0.55	1	0	0.15	0.45	0	0	0.25
172400	0	0.6	1	0	0.15	0.45	0	0	0.15
172800	0	0.6	1	0	0.05	0.35	0	0	0.15
173200	0	0.6	1	0	0.05	0.45	0	0	0.15
173600	0	0.6	1	0	0.05	0.375	0	0	0.15
174000	0	0.6	1	0	0.05	0.375	0	0	0.15
174400	0	0.6	1	0	0	0.375	0	0	0.15
174800	0	0.55	1	0	0	0.375	0	0	0.225
175200	0	0.55	1	0	0	0.375	0	0	0.225
175600	0	0.55	1	0	0	0.3	0	0.05	0.25
176000	0	0.55	1	0	0	0.275	0	0.05	0.25
176400	0	0.5	1	0	0	0.275	0	0.05	0.25
176800	0	0.5	1	0	0	0.375	0	0.05	0.325
177200	0	0.5	1	0	0	0.275	0	0.05	0.325
177600	0	0.55	1	0	0	0.275	0	0.05	0.325
178000	0	0.55	1	0	0	0.275	0	0.05	0.4
178400	0	0.55	1	0	0	0.25	0	0.05	0.4
178800	0	0.6	1	0	0	0.325	0	0.15	0.425
179200	0	0.65	1	0	0	0.325	0	0.15	0.5
179600	0	0.7	1	0	0	0.325	0	0.1	0.4
180000	0	0.7	1	0	0	0.25	0	0.1	0.4
180400	0	0.7	1	0	0	0.25	0	0.1	0.4
180800	0	0.75	1	0	0	0.15	0	0.1	0.4
181200	0	0.75	1	0	0	0.15	0	0.1	0.4
181600	0	0.75	1	0	0	0.225	0	0.1	0.475
182000	0	0.8	1	0	0	0.225	0	0.1	0.5
182400	0	0.8	1	0	0	0.15	0	0.1	0.5
182800	0	0.8	1	0	0.1	0.175	0	0	0.4
183200	0	0.8	1	0	0.1	0.175	0	0	0.325
183600	0	0.8	1	0	0.1	0.175	0	0	0.425
184000	0	0.8	1	0	0.1	0.175	0	0	0.425
184400	0	0.85	1	0	0.1	0.175	0	0	0.5
184800	0	0.85	1	0	0.1	0.175	0	0	0.5
185200	0	0.9	1	0	0.1	0.25	0	0	0.5
185600	0	0.9	1	0	0.1	0.175	0	0	0.5
186000	0.025	0.9	1	0	0.1	0.175	0	0	0.4
186400	0.025	0.95	1	0	0.1	0.175	0	0	0.325
186800	0.025	0.95	1	0	0	0.075	0	0	0.4
187200	0.025	0.95	1	0	0	0.075	0	0	0.4
187600	0.025	0.95	1	0	0	0.075	0	0	0.375
188000	0.025	1	1	0	0	0.15	0	0	0.375
188400	0.025	1	1	0	0	0.15	0	0	0.3
188800	0.025	1	1	0	0	0.225	0	0	0.225
189200	0.025	1	1	0	0	0.15	0	0	0.225
189600	0.025	1	1	0	0	0.15	0	0	0.15
190000	0.025	1	1	0	0	0.15	0	0	0.15
190400	0.025	1	1	0	0	0.15	0	0.05	0.25
190800	0.025	1	1	0	0	0.15	0	0.05	0.175
191200	0.025	1	1	0	0	0.225	0	0.05	0.175
191600	0.025	1	1	0	0	0.225	0	0.05	0.1
192000	0.025	1	1	0	0	0.15	0	0.05	0.1
192400	0.025	1	1	0	0	0.15	0	0.05	0.1
192800	0.025	1	1	0	0	0.075	0	0.05	0.175
193200	0.05	1	1	0	0	0.175	0	0.05	0.175
193600	0.05	1	1	0	0	0.175	0	0.05	0.175
194000	0.05	1	1	0	0	0.275	0	0.05	0.25
194400	0.05	1	1	0	0	0.35	0	0	0.15
194800	0.075	1	1	0	0	0.35	0	0	0.25
195200	0.1	1	1	0	0	0.275	0	0	0.25
195600	0.125	1	1	0	0	0.275	0	0	0.25
196000	0.125	1	1	0	0	0.275	0	0	0.325
196400	0.125	1	1	0	0	0.275	0	0	0.325
196800	0.15	1	1	0	0	0.35	0	0	0.25
197200	0.125	1	1	0	0	0.25	0	0	0.325
197600	0.125	1	1	0	0	0.25	0	0	0.325
198000	0.125	1	1	0	0	0.15	0	0	0.25
198400	0.15	1	1	0	0	0.075	0	0	0.25
198800	0.15	1	1	0	0	0.075	0	0	0.15
199200	0.15	1	1	0	0	0.075	0	0	0.15
199600	0.15	1	1	0	0	0.15	0	0	0.15
200000	0.175	1	1	0	0	0.15	0	0	0.075
200400	0.2	1	1	0	0.05	0.25	0	0	0.075
200800	0.2	1	1	0	0.05	0.175	0	0	0.175
201200	0.225	1	1	0	0.05	0.25	0	0	0.175
201600	0.25	1	1	0	0.05	0.35	0	0	0.175
202000	0.25	1	1	0	0.05	0.425	0	0	0.175
202400	0.25	1	1	0	0.05	0.5	0	0	0.175
202800	0.25	1	1	0	0.05	0.575	0	0	0.175
203200	0.25	1	1	0	0.1	0.675	0	0	0.175
203600	0.25	1	1	0	0.1	0.6	0	0	0.175
204000	0.25	1	1	0	0.1	0.6	0	0	0.275
204400	0.25	1	1	0	0.05	0.575	0	0	0.375
204800	0.25	1	1	0	0.05	0.675	0	0	0.35
205200	0.25	1	1	0	0.05	0.6	0	0	0.275
205600	0.25	1	1	0	0.05	0.5	0	0	0.275
206000	0.25	1	1	0	0.05	0.425	0	0	0.375
206400	0.25	1	1	0	0.05	0.35	0	0	0.375
206800	0.25	1	1	0	0.05	0.275	0	0	0.375
207200	0.25	1	1	0	0	0.175	0	0	0.475
207600	0.25	1	1	0	0	0.275	0	0	0.475
208000	0.25	1	1	0	0	0.375	0	0	0.375
208400	0.25	1	1	0	0	0.3	0	0	0.275
208800	0.25	1	1	0	0	0.275	0	0	0.2
209200	0.25	1	1	0	0	0.275	0	0	0.2
209600	0.25	1	1	0	0	0.35	0	0	0.2
210000	0.25	1	1	0	0.05	0.45	0	0	0.175
210400	0.25	1	1	0	0.05	0.525	0	0	0.175
210800	0.25	1	1	0	0.05	0.625	0	0	0.25
211200	0.325	1	1	0	0.05	0.625	0	0	0.15
211600	0.325	1	1	0	0.05	0.525	0	0.05	0.25
212000	0.325	1	1	0	0.05	0.425	0	0.05	0.25
212400	0.325	1	1	0	0.05	0.425	0	0.05	0.25
212800	0.325	1	1	0	0.05	0.45	0	0.05	0.325
213200	0.325	1	1	0	0.05	0.45	0	0.05	0.325
213600	0.325	1	1	0	0.05	0.475	0	0.05	0.4
214000	0.325	1	1	0	0	0.375	0	0.05	0.325
214400	0.325	1	1	0	0	0.375	0	0.05	0.4
214800	0.325	1	1	0	0	0.35	0	0.05	0.325
215200	0.25	1	1	0	0	0.35	0	0.05	0.325
215600	0.25	1	1	0	0	0.425	0	0	0.225
216000	0.25	1	1	0	0	0.425	0	0	0.3
216400	0.25	1	1	0	0	0.425	0	0	0.3
216800	0.25	1	1	0	0	0.4	0	0	0.225
217200	0.25	1	1	0	0	0.4	0	0	0.225
217600	0.25	1	1	0	0	0.3	0	0	0.15
218000	0.25	1	1	0	0	0.3	0	0	0.15
218400	0.25	1	1	0	0	0.225	0	0	0.075
218800	0.25	1	1	0	0	0.15	0	0	0.175
219200	0.25	1	1	0	0	0.15	0	0	0.275
219600	0.25	1	1	0	0	0.075	0	0	0.275
220000	0.25	1	1	0	0	0.175	0	0	0.3
220400	0.25	1	1	0	0	0.275	0	0	0.375
220800	0.25	1	1	0	0	0.3	0	0	0.375
221200	0.25	1	1	0	0	0.3	0	0	0.375
221600	0.25	1	1	0	0	0.3	0	0	0.45
222000	0.25	1	1	0	0	0.375	0	0	0.45
222400	0.25	1	1	0	0	0.45	0	0	0.525
222800	0.25	1	1	0	0	0.45	0	0	0.425
223200	0.25	1	1	0	0	0.525	0	0	0.325
223600	0.25	1	1	0	0	0.525	0	0	0.325
224000	0.25	1	1	0	0.05	0.525	0	0.1	0.325
224400	0.25	1	1	0	0.05	0.425	0	0.1	0.35
224800	0.25	1	1	0	0.05	0.325	0	0.1	0.35
225200	0.25	1	1	0	0.05	0.325	0	0.1	0.35
225600	0.25	1	1	0	0.05	0.325	0	0.1	0.275
226000	0.25	1	1	0	0.05	0.25	0	0.1	0.275
226400	0.25	1	1	0	0.05	0.175	0	0.1	0.2
226800	0.25	1	1	0	0.05	0.25	0	0.1	0.2
227200	0.25	1	1	0	0.05	0.175	0	0.1	0.2
227600	0.25	1	1	0	0.05	0.175	0	0.1	0.275
228000	0.25	1	1	0	0	0.075	0	0	0.175
228400	0.25	1	1	0	0	0.075	0	0	0.15
228800	0.25	1	1	0	0	0.075	0	0	0.15
229200	0.25	1	1	0	0	0.075	0	0	0.225
229600	0.25	1	1	0	0	0.075	0	0	0.225
230000	0.25	1	1	0	0	0.175	0	0	0.225
230400	0.25	1	1	0	0	0.175	0	0	0.325
230800	0.25	1	1	0	0	0.1	0	0	0.325
231200	0.25	1	1	0	0	0.2	0	0	0.325
231600	0.25	1	1	0	0	0.2	0	0	0.325
232000	0.325	1	1	0	0	0.2	0	0.05	0.425
232400	0.325	1	1	0	0	0.2	0	0.05	0.35
232800	0.325	1	1	0	0	0.2	0	0.05	0.45
233200	0.325	1	1	0	0	0.3	0	0.05	0.45
233600	0.325	1	1	0	0	0.3	0	0.05	0.525
234000	0.325	1	1	0	0	0.2	0	0.05	0.525
234400	0.325	1	1	0	0	0.2	0	0.05	0.425
234800	0.325	1	1	0	0	0.2	0	0.05	0.5
235200	0.325	1	1	0	0	0.1	0	0.05	0.575
235600	0.325	1	1	0	0	0.1	0	0.05	0.5
236000	0.25	1	1	0	0	0.175	0	0	0.4
236400	0.25	1	1	0	0	0.175	0	0	0.475
236800	0.25	1	1	0	0	0.175	0	0	0.375
237200	0.25	1	1	0	0	0.075	0	0	0.3
237600	0.25	1	1	0	0	0.075	0	0	0.3
238000	0.25	1	1	0	0	0.15	0	0	0.3
238400	0.25	1	1	0	0	0.15	0	0	0.3
238800	0.25	1	1	0	0.05	0.25	0	0	0.325
239200	0.25	1	1	0	0.05	0.25	0	0	0.25
239600	0.25	1	1	0	0.05	0.25	0	0	0.25
240000	0.25	1	1	0	0.05	0.175	0	0	0.35
240400	0.25	1	1	0	0.05	0.175	0	0	0.275
240800	0.25	1	1	0	0.05	0.175	0	0	0.35
241200	0.25	1	1	0	0.05	0.175	0	0	0.35
241600	0.25	1	1	0	0.1	0.275	0	0	0.275
242000	0.25	1	1	0	0.1	0.275	0	0	0.275
242400	0.25	1	1	0	0.2	0.375	0	0	0.275
242800	0.25	1	1	0	0.15	0.275	0	0	0.25
243200	0.25	1	1	0	0.15	0.275	0	0	0.25
243600	0.25	1	1	0	0.15	0.275	0	0	0.35
244000	0.25	1	1	0	0.15	0.275	0	0	0.325
244400	0.25	1	1	0	0.15	0.275	0	0	0.325
244800	0.25	1	1	0	0.15	0.275	0	0	0.25
245200	0.25	1	1	0	0.15	0.375	0	0	0.25
245600	0.25	1	1	0	0.1	0.35	0	0	0.325
246000	0.25	1	1	0	0.1	0.275	0	0	0.4
246400	0.25	1	1	0	0	0.25	0	0	0.4
246800	0.25	1	1	0	0	0.25	0	0	0.4
247200	0.25	1	1	0	0	0.25	0	0	0.4
247600	0.25	1	1	0	0	0.25	0	0	0.3
248000	0.25	1	1	0	0	0.325	0	0	0.325
248400	0.25	1	1	0	0	0.425	0	0	0.425
248800	0.25	1	1	0	0	0.5	0	0	0.425
249200	0.25	1	1	0	0	0.475	0	0	0.525
249600	0.25	1	1	0	0	0.4	0	0	0.45
250000	0.25	1	1	0	0	0.4	0	0	0.375
250400	0.25	1	1	0	0	0.325	0	0	0.375
250800	0.25	1	1	0	0	0.325	0	0	0.3
251200	0.25	1	1	0	0	0.4	0	0	0.4
251600	0.25	1	1	0	0	0.475	0	0	0.4
252000	0.25	1	1	0	0	0.4	0	0	0.375
252400	0.25	1	1	0	0	0.375	0	0	0.275
252800	0.25	1	1	0	0	0.3	0	0	0.35
253200	0.25	1	1	0	0	0.225	0	0	0.25
253600	0.25	1	1	0	0	0.225	0	0	0.25
254000	0.25	1	1	0	0	0.325	0	0	0.25
254400	0.25	1	1	0	0	0.325	0	0	0.25
254800	0.25	1	1	0	0	0.4	0	0	0.325
255200	0.25	1	1	0	0	0.4	0	0	0.3
255600	0.25	1	1	0	0	0.4	0	0	0.3
256000	0.25	1	1	0	0	0.475	0	0	0.225
256400	0.25	1	1	0	0	0.475	0	0	0.325
256800	0.25	1	1	0	0	0.475	0	0	0.35
257200	0.25	1	1	0	0	0.475	0	0	0.35
257600	0.25	1	1	0	0	0.575	0	0	0.45
258000	0.25	1	1	0	0	0.475	0	0	0.525
258400	0.25	1	1	0	0	0.475	0	0	0.525
258800	0.25	1	1	0	0	0.4	0	0	0.45
259200	0.25	1	1	0	0	0.325	0	0	0.45
259600	0.25	1	1	0	0	0.25	0	0	0.55
260000	0.325	1	1	0	0	0.175	0	0.05	0.65
260400	0.325	1	1	0	0	0.1	0	0.05	0.55
260800	0.325	1	1	0	0	0.1	0	0.05	0.525
261200	0.325	1	1	0	0	0.1	0	0.05	0.525
261600	0.325	1	1	0	0	0	0	0.05	0.425
262000	0.325	1	1	0	0	0	0	0.05	0.425
262400	0.325	1	1	0	0	0	0	0.05	0.425
262800	0.325	1	1	0	0	0	0	0.05	0.5
263200	0.325	1	1	0	0	0.075	0	0.05	0.5
263600	0.325	1	1	0	0	0.075	0	0.05	0.4
264000	0.25	1	1	0	0	0.075	0	0	0.375
264400	0.25	1	1	0	0	0.15	0	0	0.375
264800	0.25	1	1	0	0	0.15	0	0	0.3
265200	0.25	1	1	0	0	0.15	0	0	0.3
265600	0.25	1	1	0	0	0.15	0	0	0.3
266000	0.25	1	1	0	0	0.15	0	0	0.225
266400	0.25	1	1	0	0	0.225	0	0	0.225
266800	0.25	1	1	0	0	0.225	0	0	0.25
267200	0.25	1	1	0	0	0.15	0	0.05	0.275
267600	0.25	1	1	0	0	0.15	0	0.05	0.275
268000	0.25	1	1	0	0	0.15	0	0.05	0.2
268400	0.25	1	1	0	0	0.175	0	0.05	0.2
268800	0.25	1	1	0	0	0.175	0	0.05	0.275
269200	0.25	1	1	0	0	0.25	0	0.05	0.275
269600	0.325	1	1	0	0	0.25	0	0.05	0.275
270000	0.325	1	1	0	0	0.25	0	0.05	0.275
270400	0.325	1	1	0	0	0.175	0	0.05	0.275
270800	0.4	1	1	0	0	0.175	0	0.05	0.275
271200	0.4	1	1	0	0	0.175	0	0	0.175
271600	0.4	1	1	0	0	0.175	0	0	0.25
272000	0.475	1	1	0	0.1	0.275	0	0	0.325
272400	0.55	1	1	0	0.1	0.175	0	0	0.325
272800	0.625	1	1	0	0.1	0.175	0	0	0.25
273200	0.7	1	1	0	0.1	0.1	0	0	0.25
273600	0.625	1	1	0	0.1	0.2	0	0	0.25
274000	0.625	1	1	0	0.1	0.2	0	0	0.25
274400	0.7	1	1	0	0.1	0.2	0	0	0.25
274800	0.7	1	1	0	0.1	0.2	0	0	0.15
275200	0.775	1	1	0	0.1	0.2	0	0	0.15
275600	0.85	1	1	0	0.1	0.2	0	0	0.15
276000	0.85	1	1	0	0	0.1	0	0	0.15
276400	0.85	1	1	0	0	0.175	0	0	0.15
276800	0.85	1	1	0	0	0.175	0	0	0.25
277200	0.85	1	1	0	0	0.175	0	0	0.35
277600	0.925	1	1	0	0	0.15	0.1	0.1	0.45
278000	1	1	1	0	0	0.15	0.1	0.1	0.525
278400	1	1	1	0	0	0.15	0.1	0.1	0.6
278800	1	1	1	0	0	0.15	0.1	0.1	0.675
279200	1	1	1	0	0	0.15	0.1	0.1	0.775
279600	1	1	1	0	0	0.225	0.1	0.1	0.7
280000	1	1	1	0	0	0.225	0.1	0.1	0.725
280400	1	1	1	0	0	0.15	0.1	0.1	0.725
280800	1	1	1	0	0	0.15	0.1	0.1	0.625
281200	1	1	1	0	0	0.25	0.1	0.1	0.525
281600	1	1	1	0	0	0.175	0	0	0.425
282000	1	1	1	0	0	0.25	0	0	0.35
282400	1	1	1	0	0	0.35	0	0	0.275
282800	1	1	1	0	0	0.425	0	0	0.2
283200	1	1	1	0	0	0.525	0	0	0.175
283600	1	1	1	0	0	0.45	0	0	0.175
284000	1	1	1	0	0	0.45	0	0	0.175
284400	1	1	1	0	0.05	0.55	0	0	0.175
284800	1	1	1	0	0.05	0.55	0	0	0.175
285200	1	1	1	0	0.05	0.45	0	0.05	0.275
285600	1	1	1	0	0.05	0.45	0	0.05	0.275
286000	1	1	1	0	0.05	0.45	0	0.05	0.275
286400	1	1	1	0	0.05	0.35	0	0.05	0.275
286800	1	1	1	0	0.05	0.275	0	0.05	0.275
287200	1	1	1	0	0.05	0.175	0	0.05	0.2
287600	1	1	1	0	0.05	0.175	0	0.05	0.2
288000	1	1	1	0	0.05	0.25	0	0.05	0.1
288400	1	1	1	0	0	0.15	0	0.05	0.1
288800	1	1	1	0	0	0.15	0	0.05	0.175
289200	1	1	1	0	0	0.15	0	0	0.075
289600	1	1	1	0	0	0.225	0	0	0.075
290000	1	1	1	0	0	0.15	0	0	0.075
290400	1	1	1	0	0	0.15	0	0	0.15
290800	1	1	1	0	0.1	0.25	0	0	0.15
291200	1	1	1	0	0.1	0.25	0	0	0.15
291600	1	1	1	0	0.1	0.325	0	0	0.15
292000	1	1	1	0	0.1	0.25	0	0	0.225
292400	1	1	1	0	0.1	0.25	0	0	0.225
292800	1	1	1	0	0.1	0.25	0	0	0.225
293200	1	1	1	0	0.1	0.25	0	0	0.225
293600	1	1	1	0	0.1	0.275	0	0	0.3
294000	1	1	1	0	0.1	0.275	0	0	0.3
294400	1	1	1	0	0.1	0.275	0	0	0.225
294800	1	1	1	0	0	0.175	0	0	0.225
295200	1	1	1	0	0.05	0.275	0	0	0.225
295600	1	1	1	0	0.05	0.2	0	0	0.325
296000	1	1	1	0	0.05	0.2	0	0	0.25
296400	1	1	1	0	0.05	0.2	0	0	0.25
296800	1	1	1	0	0.05	0.275	0	0	0.175
297200	1	1	1	0	0.05	0.275	0	0	0.175
297600	1	1	1	0	0.05	0.175	0	0	0.2
298000	1	1	1	0	0.05	0.25	0	0	0.2
298400	1	1	1	0	0.05	0.25	0	0	0.3
298800	1	1	1	0	0.05	0.25	0	0	0.4
299200	1	1	1	0	0	0.225	0	0	0.4
299600	1	1	1	0	0	0.225	0	0	0.3
300000	1	1	1	0	0	0.225	0	0	0.3
300400	1	1	1	0	0	0.3	0	0	0.3
300800	1	1	1	0	0	0.225	0	0	0.3
301200	1	1	1	0	0	0.3	0	0	0.4
301600	1	1	1	0	0	0.3	0	0	0.3
302000	1	1	1	0	0	0.225	0	0	0.3
302400	1	1	1	0	0	0.225	0	0	0.2
302800	1	1	1	0	0	0.225	0	0	0.1
303200	1	1	1	0	0	0.25	0	0	0.2
303600	1	1	1	0	0	0.25	0	0	0.2
304000	1	1	1	0	0	0.25	0	0	0.2
304400	1	1	1	0	0	0.275	0	0	0.2
304800	1	1	1	0	0	0.275	0	0	0.275
305200	1	1	1	0	0	0.2	0	0	0.175
305600	1	1	1	0	0	0.2	0	0	0.175
306000	1	1	1	0	0	0.2	0	0	0.25
306400	1	1	1	0	0	0.275	0	0	0.325
306800	1	1	1	0	0	0.35	0	0	0.325
307200	1	1	1	0	0	0.25	0	0	0.325
307600	1	1	1	0	0	0.25	0	0	0.325
308000	1	1	1	0	0	0.25	0	0	0.425
308400	1	1	1	0	0	0.15	0	0	0.425
308800	1	1	1	0	0	0.15	0	0	0.35
309200	1	1	1	0	0	0.225	0	0	0.35
309600	1	1	1	0	0	0.225	0	0	0.425
310000	1	1	1	0	0	0.3	0	0	0.35
310400	1	1	1	0	0	0.325	0	0	0.35
310800	1	1	1	0	0	0.325	0	0	0.425
311200	1	1	1	0	0	0.4	0.025	0.1	0.425
311600	1	1	1	0	0	0.4	0.025	0.1	0.425
312000	1	1	1	0	0	0.475	0.025	0.1	0.4
312400	1	1	1	0	0	0.55	0.025	0.1	0.5
312800	1	1	1	0	0.05	0.65	0.025	0.1	0.575
313200	1	1	1	0	0.05	0.575	0.025	0.1	0.575
313600	1	1	1	0	0.05	0.575	0.025	0.1	0.575
314000	1	1	1	0	0.05	0.5	0.025	0.1	0.575
314400	1	1	1	0	0.05	0.4	0.025	0.1	0.575
314800	1	1	1	0	0.05	0.325	0.025	0.1	0.5
315200	1	1	1	0	0.05	0.35	0	0	0.4
315600	1	1	1	0	0.05	0.35	0	0	0.4
316000	1	1	1	0	0.05	0.275	0	0	0.425
316400	1	1	1	0	0.05	0.2	0	0	0.325
316800	1	1	1	0	0	0.1	0	0	0.325
317200	1	1	1	0	0	0.1	0	0	0.325
317600	1	1	1	0	0	0.1	0	0	0.25
318000	1	1	1	0	0	0.1	0	0	0.25
318400	1	1	1	0	0	0.1	0	0	0.175
318800	1	1	1	0	0	0.175	0	0	0.175
319200	1	1	1	0	0	0.15	0	0	0.175
319600	1	1	1	0	0	0.15	0	0	0.275
320000	1	1	1	0	0	0.15	0	0	0.25
320400	1	1	1	0	0	0.225	0	0	0.25
320800	1	1	1	0	0	0.225	0	0	0.25
321200	1	1	1	0	0	0.225	0	0	0.25
321600	1	1	1	0	0	0.225	0	0.05	0.35
322000	1	1	1	0	0	0.225	0	0.05	0.35
322400	1	1	1	0	0	0.3	0	0.05	0.35
322800	1	1	1	0	0	0.225	0	0.1	0.45
323200	1	1	1	0	0	0.225	0	0.1	0.45
323600	1	1	1	0	0	0.225	0	0.1	0.35
324000	1	1	1	0	0	0.325	0	0.1	0.375
324400	1	1	1	0	0	0.25	0	0.1	0.475
324800	1	1	1	0	0	0.25	0	0.1	0.4
325200	1	1	1	0	0.1	0.35	0	0.1	0.4
325600	1	1	1	0	0.1	0.35	0	0.05	0.3
326000	1	1	1	0	0.1	0.35	0	0.05	0.3
326400	1	1	1	0	0.1	0.275	0	0.05	0.3
326800	1	1	1	0	0.1	0.275	0	0	0.275
327200	1	1	1	0	0.1	0.2	0	0	0.35
327600	1	1	1	0	0.1	0.2	0	0	0.35
328000	1	1	1	0	0.1	0.1	0	0	0.25
328400	1	1	1	0	0.1	0.1	0	0	0.15
328800	1	1	1	0	0.1	0.1	0	0	0.25
329200	1	1	1	0	0	0	0	0	0.25
329600	1	1	1	0	0	0.075	0	0	0.25
330000	1	1	1	0	0	0.075	0	0	0.325
330400	1	1	1	0	0	0.075	0	0	0.325
330800	1	1	1	0	0	0.15	0	0	0.325
331200	1	1	1	0	0	0.15	0	0	0.325
331600	1	1	1	0	0	0.15	0	0	0.425
332000	1	1	1	0	0	0.225	0	0	0.425
332400	1	1	1	0	0	0.225	0	0	0.525
332800	1	1	1	0	0	0.3	0	0	0.5
333200	1	1	1	0	0.1	0.4	0	0	0.6
333600	1	1	1	0	0.1	0.325	0	0	0.675
334000	1	1	1	0	0.1	0.325	0	0	0.7
334400	1	1	1	0	0.1	0.325	0	0	0.8
334800	1	1	1	0	0.1	0.35	0	0	0.8
335200	1	1	1	0	0.1	0.35	0	0	0.825
335600	1	1	1	0	0.1	0.425	0	0	0.8
336000	1	1	1	0	0.1	0.35	0	0	0.875
336400	1	1	1	0	0.1	0.45	0	0	0.85
336800	1	1	1	0	0.1	0.375	0	0	0.775
337200	1	1	1	0	0	0.35	0	0	0.675
337600	1	1	1	0	0	0.35	0	0	0.675
338000	1	1	1	0	0	0.35	0	0	0.575
338400	1	1	1	0	0	0.425	0	0	0.475
338800	1	1	1	0	0	0.325	0	0	0.4
339200	1	1	1	0	0	0.325	0	0	0.4
339600	1	1	1	0	0	0.25	0	0	0.325
340000	1	1	1	0	0	0.25	0	0	0.25
340400	1	1	1	0	0	0.225	0	0	0.25
340800	1	1	1	0	0	0.225	0	0	0.25
341200	1	1	1	0	0	0.15	0	0	0.325
341600	1	1	1	0	0	0.15	0	0	0.25
342000	1	1	1	0	0	0.25	0	0	0.325
342400	1	1	1	0	0	0.175	0	0.05	0.425
342800	1	1	1	0	0	0.25	0	0.05	0.525
343200	1	1	1	0	0	0.25	0	0.05	0.5
343600	1	1	1	0	0	0.25	0	0.05	0.575
344000	1	1	1	0	0	0.25	0	0.05	0.675
344400	1	1	1	0	0	0.175	0	0.05	0.6
344800	1	1	1	0	0	0.175	0	0.05	0.6
345200	1	1	1	0	0	0.175	0	0.05	0.625
345600	1	1	1	0	0	0.275	0	0.05	0.625
346000	1	1	1	0	0	0.25	0	0.05	0.55
346400	1	1	1	0	0	0.35	0	0	0.525
346800	1	1	1	0	0	0.275	0	0	0.425
347200	1	1	1	0	0	0.275	0	0	0.425
347600	1	1	1	0	0	0.35	0	0	0.35
348000	1	1	1	0	0	0.35	0	0	0.25
348400	1	1	1	0	0	0.425	0	0	0.325
348800	1	1	1	0	0	0.5	0	0	0.325
349200	1	1	1	0	0	0.5	0	0.05	0.325
349600	1	1	1	0	0	0.4	0	0.05	0.325
350000	1	1	1	0	0	0.325	0	0.05	0.325
350400	1	1	1	0	0	0.3	0	0.05	0.25
350800	1	1	1	0	0	0.375	0	0.05	0.25
351200	1	1	1	0	0	0.375	0	0.05	0.25
351600	1	1	1	0	0	0.4	0	0.05	0.25
352000	1	1	1	0	0	0.475	0	0.05	0.25
352400	1	1	1	0	0	0.5	0	0.05	0.25
352800	1	1	1	0	0	0.425	0	0.05	0.25
353200	1	1	1	0	0	0.5	0	0	0.225
353600	1	1	1	0	0	0.5	0	0	0.225
354000	1	1	1	0	0	0.5	0	0	0.325
354400	1	1	1	0	0	0.425	0	0.05	0.425
354800	1	1	1	0	0	0.35	0	0.05	0.425
355200	1	1	1	0	0	0.35	0	0.05	0.45
355600	1	1	1	0	0	0.25	0	0.05	0.45
356000	1	1	1	0	0	0.175	0	0.05	0.45
356400	1	1	1	0	0	0.075	0	0.05	0.45
356800	1	1	1	0	0	0.075	0	0.05	0.525
357200	1	1	1	0	0	0	0	0.1	0.55
357600	1	1	1	0	0	0	0	0.1	0.65
358000	1	1	1	0	0	0	0	0.1	0.55
358400	1	1	1	0	0	0	0	0.1	0.55
358800	1	1	1	0	0	0.075	0	0.1	0.55
359200	1	1	1	0	0	0.175	0	0.15	0.55
359600	1	1	1	0	0	0.175	0	0.15	0.55
360000	1	1	1	0	0	0.25	0	0.15	0.55
360400	1	1	1	0	0	0.25	0	0.15	0.475
360800	1	1	1	0	0	0.25	0	0.15	0.4
361200	1	1	1	0	0	0.25	0	0.1	0.375
361600	1	1	1	0	0	0.25	0	0.1	0.35
362000	1	1	1	0	0	0.25	0	0.1	0.425
362400	1	1	1	0	0.1	0.35	0	0.05	0.425
362800	1	1	1	0	0.1	0.275	0	0.05	0.425
363200	1	1	1	0	0.1	0.175	0	0	0.4
363600	1	1	1	0	0.1	0.175	0	0	0.4
364000	1	1	1	0	0.1	0.1	0	0	0.475
364400	1	1	1	0	0.1	0.175	0	0	0.55
364800	1	1	1	0	0.1	0.25	0	0	0.65
365200	1	1	1	0	0.1	0.25	0	0	0.65
365600	1	1	1	0	0.1	0.25	0	0	0.65
366000	1	1	1	0	0.1	0.35	0	0	0.65
366400	1	1	1	0	0	0.325	0	0.05	0.65
366800	1	1	1	0	0	0.4	0	0.05	0.65
367200	1	1	1	0	0	0.475	0	0.1	0.675
367600	1	1	1	0	0	0.475	0	0.1	0.675
368000	1	1	1	0	0	0.55	0	0.15	0.7
368400	1	1	1	0	0	0.55	0	0.15	0.625
368800	1	1	1	0	0	0.55	0	0.15	0.625
369200	1	1	1	0	0	0.65	0	0.15	0.55
369600	1	1	1	0	0	0.65	0	0.15	0.475
370000	1	1	1	0	0	0.625	0	0.15	0.5
370400	1	1	1	0	0	0.55	0	0.1	0.4
370800	1	1	1	0	0	0.475	0	0.1	0.4
371200	1	1	1	0	0	0.475	0	0.05	0.3
371600	1	1	1	0	0	0.55	0	0.05	0.3
372000	1	1	1	0	0	0.475	0	0	0.2
372400	1	1	1	0	0	0.5	0	0	0.2
372800	1	1	1	0	0	0.5	0	0	0.1
373200	1	1	1	0	0	0.4	0	0	0.1
373600	1	1	1	0	0	0.4	0	0	0.2
374000	1	1	1	0	0	0.4	0	0	0.175
374400	1	1	1	0	0	0.4	0	0	0.175
374800	1	1	1	0	0	0.5	0	0	0.175
375200	1	1	1	0	0	0.425	0	0	0.25
375600	1	1	1	0	0	0.425	0	0	0.35
376000	1	1	1	0	0	0.425	0	0	0.35
376400	1	1	1	0	0	0.425	0	0	0.35
376800	1	1	1	0	0	0.35	0	0.05	0.45
377200	1	1	1	0	0	0.35	0	0.05	0.45
377600	1	1	1	0	0	0.35	0	0.05	0.45
378000	1	1	1	0	0	0.275	0	0.05	0.475
378400	1	1	1	0	0	0.275	0	0.05	0.475
378800	1	1	1	0	0	0.175	0	0.05	0.475
379200	1	1	1	0	0	0.25	0	0.05	0.475
379600	1	1	1	0	0	0.25	0	0.05	0.45
380000	1	1	1	0	0	0.325	0	0.05	0.45
380400	1	1	1	0	0	0.225	0	0.05	0.45
380800	1	1	1	0	0	0.225	0	0	0.35
381200	1	1	1	0	0	0.3	0	0	0.35
381600	1	1	1	0	0	0.3	0	0	0.325
382000	1	1	1	0	0	0.375	0	0	0.225
382400	1	1	1	0	0	0.45	0	0	0.3
382800	1	1	1	0	0	0.45	0	0	0.4
383200	1	1	1	0	0	0.45	0	0	0.4
383600	1	1	1	0	0	0.375	0	0	0.4
384000	1	1	1	0	0	0.3	0	0	0.4
384400	1	1	1	0	0	0.3	0	0	0.4
384800	1	1	1	0	0	0.3	0	0	0.475
385200	1	1	1	0	0	0.225	0	0	0.55
385600	1	1	1	0	0	0.3	0	0	0.55
386000	1	1	1	0	0	0.225	0	0	0.625
386400	1	1	1	0	0	0.15	0	0	0.625
386800	1	1	1	0	0	0.15	0	0	0.625
387200	1	1	1	0	0	0.075	0	0	0.65
387600	1	1	1	0	0	0.075	0	0	0.575
388000	1	1	1	0	0	0.075	0	0	0.65
388400	1	1	1	0	0	0.15	0	0	0.725
388800	1	1	1	0	0	0.225	0	0	0.65
389200	1	1	1	0	0	0.3	0	0	0.575
389600	1	1	1	0	0	0.3	0	0	0.6
390000	1	1	1	0	0	0.3	0	0.05	0.625
390400	1	1	1	0	0	0.3	0	0.05	0.625
390800	1	1	1	0	0	0.4	0	0.05	0.525
391200	1	1	1	0	0	0.475	0	0.05	0.425
391600	1	1	1	0	0	0.475	0	0.05	0.425
392000	1	1	1	0	0	0.575	0	0.05	0.425
392400	1	1	1	0	0	0.5	0	0.05	0.45
392800	1	1	1	0	0	0.425	0	0.05	0.45
393200	1	1	1	0	0	0.35	0	0.05	0.45
393600	1	1	1	0	0	0.275	0	0.05	0.35
394000	1	1	1	0	0	0.375	0	0	0.35
394400	1	1	1	0	0	0.375	0	0	0.35
394800	1	1	1	0	0	0.275	0	0	0.35
395200	1	1	1	0	0	0.275	0	0	0.35
395600	1	1	1	0	0	0.35	0	0	0.45
396000	1	1	1	0	0	0.25	0	0	0.375
396400	1	1	1	0	0	0.325	0	0	0.275
396800	1	1	1	0	0	0.425	0	0	0.275
397200	1	1	1	0	0	0.425	0	0	0.275
397600	1	1	1	0	0	0.5	0	0	0.275
398000	1	1	1	0	0	0.4	0	0	0.25
398400	1	1	1	0	0	0.4	0	0	0.275
398800	1	1	1	0	0	0.4	0	0	0.275
399200	1	1	1	0	0	0.325	0	0	0.35
399600	1	1	1	0	0	0.325	0	0	0.35
400000	1	1	1	0	0	0.325	0	0	0.35
