# Supplementary material
Source: ML conference proceedings conference paper supplement (https://openreview.net/forum?id=Lb8ZnWW_In6)
Supplement: supplementary_material [file office_all.xlsx]

## Sheet: t1
0	0	0	0	0	0	0	0	0	0
1000	0	0	0	0	0	0.75	0	0	0
2000	0	0	0	0	0.5	0.875	0	0	0
3000	0	0	0	0	0.333333	0.833333	0	0	0
4000	0	0	0	0.0625	0.5	0.875	0.25	0.25	0.25
5000	0	0	0	0.05	0.4	0.9	0.4	0.4	0.4
6000	0	0	0	0.0416667	0.333333	0.916667	0.5	0.5	0.5
7000	0	0	0	0.0714286	0.428571	0.928571	0.571429	0.571429	0.571429
8000	0	0	0	0.0625	0.375	0.9375	0.625	0.625	0.625
9000	0	0	0	0.0833333	0.444444	0.944444	0.666667	0.666667	0.666667
10000	0	0	0.075	0.075	0.45	0.95	0.7	0.7	0.7
11000	0	0	0.0681818	0.0681818	0.454545	0.954545	0.727273	0.727273	0.727273
12000	0	0	0.136364	0.0681818	0.5	0.977273	0.818182	0.818182	0.818182
13000	0.0909091	0.0909091	0.227273	0.159091	0.5	0.977273	0.909091	0.909091	0.909091
14000	0.181818	0.181818	0.318182	0.181818	0.590909	1	1	1	1
15000	0.272727	0.272727	0.409091	0.159091	0.5	1	1	1	1
16000	0.363636	0.363636	0.5	0.159091	0.5	0.909091	0.931818	1	1
17000	0.454545	0.454545	0.590909	0.159091	0.5	0.886364	0.931818	1	1
18000	0.545455	0.545455	0.681818	0.227273	0.5	0.886364	0.931818	1	1
19000	0.636364	0.636364	0.772727	0.227273	0.545455	0.886364	0.931818	1	1
20000	0.727273	0.727273	0.863636	0.204545	0.545455	0.886364	0.931818	1	1		s
21000	0.818182	0.818182	0.886364	0.227273	0.590909	0.886364	0.931818	1	1
22000	0.909091	0.909091	0.977273	0.25	0.636364	0.886364	0.863636	1	1
23000	1	1	1	0.340909	0.681818	0.886364	0.863636	1	1
24000	1	1	1	0.25	0.636364	0.886364	0.863636	1	1
25000	1	1	1	0.227273	0.545455	0.886364	0.863636	1	1
26000	1	1	1	0.318182	0.636364	0.886364	0.863636	1	1
27000	1	1	1	0.409091	0.727273	0.977273	0.931818	1	1
28000	1	1	1	0.409091	0.772727	1	0.931818	1	1
29000	1	1	1	0.318182	0.681818	0.977273	0.931818	1	1
30000	1	1	1	0.409091	0.727273	0.977273	0.931818	1	1
31000	1	1	1	0.5	0.727273	0.977273	0.931818	1	1
32000	1	1	1	0.477273	0.727273	0.977273	0.931818	1	1
33000	1	1	1	0.477273	0.727273	0.977273	1	1	1
34000	1	1	1	0.409091	0.727273	0.977273	1	1	1
35000	1	1	1	0.409091	0.772727	0.977273	1	1	1
36000	1	1	1	0.5	0.863636	0.977273	1	1	1
37000	1	1	1	0.5	0.863636	0.977273	1	1	1
38000	1	1	1	0.5	0.863636	0.977273	1	1	1
39000	1	1	1	0.5	0.909091	0.977273	1	1	1
40000	1	1	1	0.590909	1	1	1	1	1
41000	1	1	1	0.5	1	1	1	1	1
42000	1	1	1	0.409091	1	1	1	1	1
43000	1	1	1	0.409091	1	1	0.931818	1	1
44000	1	1	1	0.477273	1	1	0.931818	1	1
45000	1	1	1	0.545455	1	1	0.931818	1	1
46000	1	1	1	0.545455	1	1	0.863636	1	1
47000	1	1	1	0.545455	1	1	0.863636	1	1
48000	1	1	1	0.545455	1	1	0.863636	1	1
49000	1	1	1	0.454545	0.909091	0.909091	0.863636	1	1
50000	1	1	1	0.545455	0.909091	0.909091	0.863636	1	1
51000	1	1	1	0.545455	0.909091	0.909091	0.863636	1	1
52000	1	1	1	0.568182	0.909091	0.909091	0.863636	1	1
53000	1	1	1	0.590909	0.909091	0.909091	0.863636	1	1
54000	1	1	1	0.681818	0.909091	0.909091	0.931818	1	1
55000	1	1	1	0.613636	0.909091	0.909091	0.931818	1	1
56000	1	1	1	0.613636	0.909091	0.909091	0.840909	1	1
57000	1	1	1	0.704545	0.909091	0.909091	0.909091	1	1
58000	1	1	1	0.636364	0.909091	0.909091	0.909091	1	1
59000	1	1	1	0.636364	0.909091	0.909091	0.909091	1	1
60000	1	1	1	0.727273	1	1	0.909091	1	1
61000	1	1	1	0.727273	1	1	0.909091	1	1
62000	1	1	1	0.727273	1	1	0.909091	1	1
63000	1	1	1	0.795455	1	1	0.909091	1	1
64000	1	1	1	0.863636	1	1	0.909091	1	1
65000	1	1	1	0.863636	1	1	0.909091	1	1
66000	1	1	1	0.931818	1	1	0.909091	1	1
67000	1	1	1	0.931818	1	1	1	1	1
68000	1	1	1	0.931818	1	1	1	1	1
69000	1	1	1	1	1	1	1	1	1
70000	1	1	1	0.931818	1	1	1	1	1
71000	1	1	1	0.931818	1	1	1	1	1
72000	1	1	1	0.931818	1	1	1	1	1
73000	1	1	1	0.931818	1	1	1	1	1
74000	1	1	1	0.931818	1	1	1	1	1
75000	1	1	1	0.931818	1	1	1	1	1
76000	1	1	1	0.931818	1	1	1	1	1
77000	1	1	1	0.931818	1	1	1	1	1
78000	1	1	1	0.863636	1	1	1	1	1
79000	1	1	1	0.863636	1	1	0.931818	1	1
80000	1	1	1	0.863636	1	1	0.931818	1	1
81000	1	1	1	0.931818	1	1	0.931818	1	1
82000	1	1	1	0.931818	1	1	0.931818	1	1
83000	1	1	1	0.931818	1	1	0.931818	1	1
84000	1	1	1	0.931818	1	1	0.931818	1	1
85000	1	1	1	0.931818	1	1	0.931818	1	1
86000	1	1	1	0.931818	1	1	0.931818	1	1
87000	1	1	1	0.931818	1	1	0.931818	1	1
88000	1	1	1	0.931818	1	1	0.931818	1	1
89000	1	1	1	1	1	1	0.931818	1	1
90000	1	1	1	1	1	1	1	1	1
91000	1	1	1	0.931818	1	1	1	1	1
92000	1	1	1	0.931818	1	1	1	1	1
93000	1	1	1	0.840909	0.954545	1	1	1	1
94000	1	1	1	0.840909	0.954545	1	1	1	1
95000	1	1	1	0.840909	0.954545	1	1	1	1
96000	1	1	1	0.840909	0.954545	1	1	1	1
97000	1	1	1	0.840909	0.954545	1	1	1	1
98000	1	1	1	0.840909	0.954545	1	1	1	1
99000	1	1	1	0.840909	0.954545	1	1	1	1
100000	1	1	1	0.840909	0.954545	1	1	1	1
101000	1	1	1	0.840909	0.954545	1	1	1	1
102000	1	1	1	0.909091	0.954545	1	1	1	1
103000	1	1	1	0.909091	0.954545	1	1	1	1
104000	1	1	1	1	1	1	1	1	1
105000	1	1	1	1	1	1	1	1	1
106000	1	1	1	1	1	1	1	1	1
107000	1	1	1	1	1	1	0.931818	1	1
108000	1	1	1	1	1	1	0.840909	1	1
109000	1	1	1	1	1	1	0.75	1	1
110000	1	1	1	1	1	1	0.75	1	1
111000	1	1	1	1	1	1	0.75	1	1
112000	1	1	1	1	1	1	0.75	1	1
113000	1	1	1	1	1	1	0.75	1	1
114000	1	1	1	1	1	1	0.75	1	1
115000	1	1	1	1	1	1	0.75	1	1
116000	1	1	1	1	1	1	0.75	1	1
117000	1	1	1	1	1	1	0.75	1	1
118000	1	1	1	1	1	1	0.818182	1	1
119000	1	1	1	1	1	1	0.909091	1	1
120000	1	1	1	1	1	1	1	1	1
121000	1	1	1	1	1	1	1	1	1
122000	1	1	1	1	1	1	1	1	1
123000	1	1	1	1	1	1	1	1	1
124000	1	1	1	1	1	1	1	1	1
125000	1	1	1	1	1	1	1	1	1
126000	1	1	1	0.931818	1	1	1	1	1
127000	1	1	1	0.863636	1	1	1	1	1
128000	1	1	1	0.863636	1	1	1	1	1
129000	1	1	1	0.863636	1	1	1	1	1
130000	1	1	1	0.863636	1	1	1	1	1
131000	1	1	1	0.863636	1	1	1	1	1
132000	1	1	1	0.795455	1	1	1	1	1
133000	1	1	1	0.795455	1	1	1	1	1
134000	1	1	1	0.795455	1	1	1	1	1
135000	1	1	1	0.795455	1	1	1	1	1
136000	1	1	1	0.795455	1	1	1	1	1
137000	1	1	1	0.863636	1	1	1	1	1
138000	1	1	1	0.931818	1	1	1	1	1
139000	1	1	1	0.863636	1	1	1	1	1
140000	1	1	1	0.863636	1	1	1	1	1
141000	1	1	1	0.863636	1	1	1	1	1
142000	1	1	1	0.863636	1	1	1	1	1
143000	1	1	1	0.931818	1	1	0.931818	1	1
144000	1	1	1	0.931818	1	1	0.840909	0.954545	1
145000	1	1	1	0.931818	1	1	0.840909	0.954545	1
146000	1	1	1	0.931818	1	1	0.840909	0.954545	1
147000	1	1	1	0.931818	1	1	0.772727	0.954545	1
148000	1	1	1	0.931818	1	1	0.772727	0.954545	1
149000	1	1	1	0.931818	1	1	0.772727	0.954545	1
150000	1	1	1	0.931818	1	1	0.772727	0.954545	1
151000	1	1	1	0.931818	1	1	0.772727	0.954545	1
152000	1	1	1	0.931818	1	1	0.704545	0.954545	1
153000	1	1	1	0.931818	1	1	0.704545	0.954545	1
154000	1	1	1	0.931818	1	1	0.704545	0.954545	1
155000	1	1	1	0.931818	1	1	0.795455	1	1
156000	1	1	1	0.931818	1	1	0.795455	1	1
157000	1	1	1	0.931818	1	1	0.727273	1	1
158000	1	1	1	0.931818	1	1	0.795455	1	1
159000	1	1	1	0.931818	1	1	0.795455	1	1
160000	1	1	1	0.931818	1	1	0.795455	1	1
161000	1	1	1	1	1	1	0.795455	1	1
162000	1	1	1	1	1	1	0.795455	1	1
163000	1	1	1	1	1	1	0.863636	1	1
164000	1	1	1	1	1	1	0.863636	1	1
165000	1	1	1	1	1	1	0.931818	1	1
166000	1	1	1	1	1	1	0.931818	1	1
167000	1	1	1	1	1	1	0.931818	1	1
168000	1	1	1	1	1	1	1	1	1
169000	1	1	1	1	1	1	1	1	1
170000	1	1	1	1	1	1	1	1	1
171000	1	1	1	1	1	1	1	1	1
172000	1	1	1	0.909091	1	1	1	1	1
173000	1	1	1	0.840909	1	1	1	1	1
174000	1	1	1	0.772727	1	1	1	1	1
175000	1	1	1	0.772727	1	1	1	1	1
176000	1	1	1	0.772727	1	1	1	1	1
177000	1	1	1	0.772727	1	1	1	1	1
178000	1	1	1	0.772727	1	1	1	1	1
179000	1	1	1	0.772727	1	1	1	1	1
180000	1	1	1	0.772727	1	1	1	1	1
181000	1	1	1	0.772727	1	1	1	1	1
182000	1	1	1	0.681818	1	1	1	1	1
183000	1	1	1	0.772727	1	1	1	1	1
184000	1	1	1	0.840909	1	1	1	1	1
185000	1	1	1	0.909091	1	1	1	1	1
186000	1	1	1	0.840909	1	1	1	1	1
187000	1	1	1	0.840909	1	1	1	1	1
188000	1	1	1	0.75	1	1	1	1	1
189000	1	1	1	0.75	1	1	1	1	1
190000	1	1	1	0.75	1	1	1	1	1
191000	1	1	1	0.75	1	1	1	1	1
192000	1	1	1	0.659091	1	1	1	1	1
193000	1	1	1	0.75	1	1	1	1	1
194000	1	1	1	0.681818	1	1	1	1	1
195000	1	1	1	0.613636	1	1	1	1	1
196000	1	1	1	0.613636	1	1	1	1	1
197000	1	1	1	0.681818	1	1	1	1	1
198000	1	1	1	0.681818	1	1	1	1	1
199000	1	1	1	0.772727	1	1	1	1	1
200000	1	1	1	0.772727	1	1	1	1	1
201000	1	1	1	0.75	1	1	1	1	1
202000	1	1	1	0.722222	1	1	1	1	1
203000	1	1	1	0.8125	1	1	1	1	1
204000	1	1	1	0.785714	1	1	1	1	1
205000	1	1	1	0.875	1	1	1	1	1
206000	1	1	1	1	1	1	1	1	1
207000	1	1	1	1	1	1	1	1	1
208000	1	1	1	1	1	1	1	1	1
209000	1	1	1	1	1	1	1	1	1

## Sheet: t2
0	0	0	0	0	0	0	0	0	0
1000	0	0	0	0	0	0.75	0	0	0
2000	0	0	0	0	0	0.375	0	0	0
3000	0	0	0	0	0	0.25	0	0	0
4000	0	0	0	0	0	0.1875	0	0	0
5000	0	0	0	0	0	0.15	0	0	0.2
6000	0	0	0	0	0	0.125	0	0.166667	0.333333
7000	0	0	0	0	0	0.107143	0	0.142857	0.285714
8000	0	0	0	0	0	0.1875	0	0.25	0.375
9000	0	0	0	0	0	0.166667	0	0.277778	0.444444
10000	0	0	0	0	0	0.15	0	0.25	0.475
11000	0	0	0	0	0.05	0.175	0	0.25	0.55
12000	0	0	0	0	0.05	0.175	0	0.25	0.55
13000	0	0	0	0	0.05	0.175	0	0.25	0.625
14000	0	0	0	0	0.05	0.175	0	0.25	0.625
15000	0	0	0	0	0.05	0.175	0	0.25	0.525
16000	0	0	0	0	0.05	0.275	0	0.15	0.5
17000	0	0	0	0	0.05	0.275	0	0.25	0.6
18000	0	0	0	0	0.05	0.2	0	0.15	0.5
19000	0	0	0	0	0.05	0.275	0	0.1	0.475
20000	0	0	0	0	0.05	0.275	0	0.1	0.4
21000	0	0	0	0	0	0.175	0	0.1	0.325
22000	0	0	0	0	0	0.175	0	0.1	0.325
23000	0	0	0	0	0	0.25	0	0.1	0.25
24000	0	0	0	0	0	0.25	0	0.1	0.25
25000	0	0	0	0	0	0.25	0	0.1	0.325
26000	0	0	0	0	0	0.15	0	0.1	0.25
27000	0	0	0	0	0	0.15	0	0	0.225
28000	0	0	0	0	0	0.15	0	0	0.225
29000	0	0	0.075	0	0	0.075	0	0	0.15
30000	0	0	0.15	0	0	0.075	0	0	0.15
31000	0	0	0.25	0	0	0.075	0	0	0.15
32000	0	0.05	0.35	0	0	0.075	0	0	0.15
33000	0	0.15	0.45	0	0	0.075	0	0	0.225
34000	0.1	0.25	0.55	0	0	0.075	0	0	0.225
35000	0.2	0.35	0.65	0	0	0.075	0	0	0.15
36000	0.3	0.45	0.75	0	0	0.075	0	0	0.15
37000	0.4	0.55	0.85	0	0	0.075	0	0	0.15
38000	0.5	0.65	0.95	0	0	0.075	0	0	0.15
39000	0.6	0.75	0.975	0	0	0.075	0	0	0.15
40000	0.7	0.85	1	0	0	0.075	0	0	0.15
41000	0.8	0.95	1	0	0	0.15	0	0	0.15
42000	0.9	1	1	0	0	0.225	0	0	0.15
43000	1	1	1	0	0	0.15	0	0	0.075
44000	1	1	1	0	0	0.15	0	0	0.075
45000	1	1	1	0	0	0.15	0	0	0.075
46000	1	1	1	0	0	0.15	0	0	0.075
47000	1	1	1	0	0	0.15	0	0	0
48000	1	1	1	0	0	0.15	0	0	0
49000	1	1	1	0	0	0.15	0	0	0
50000	1	1	1	0	0	0.15	0	0	0
51000	1	1	1	0	0	0.075	0	0	0
52000	1	1	1	0	0	0.075	0	0	0
53000	1	1	1	0	0	0.075	0	0	0.1
54000	1	1	1	0	0	0.075	0	0	0.1
55000	1	1	1	0	0	0.15	0	0	0.1
56000	1	1	1	0	0	0.25	0	0	0.1
57000	1	1	1	0	0	0.25	0	0	0.1
58000	1	1	1	0	0	0.25	0	0	0.1
59000	1	1	1	0	0	0.25	0	0	0.1
60000	1	1	1	0	0	0.25	0	0	0.1
61000	1	1	1	0	0	0.325	0	0	0.1
62000	1	1	1	0	0	0.25	0	0	0.1
63000	1	1	1	0	0	0.25	0	0	0
64000	1	1	1	0	0	0.25	0	0	0
65000	1	1	1	0	0	0.175	0	0	0
66000	1	1	1	0	0	0.075	0	0	0.1
67000	1	1	1	0	0	0.075	0	0	0.175
68000	1	1	1	0	0	0.075	0	0	0.25
69000	1	1	1	0	0	0.075	0	0	0.25
70000	1	1	1	0	0	0.075	0	0	0.25
71000	1	1	1	0	0	0	0	0	0.25
72000	1	1	1	0	0	0	0	0	0.25
73000	1	1	1	0	0	0.075	0	0	0.25
74000	1	1	1	0	0	0.075	0	0	0.25
75000	1	1	1	0	0	0.075	0	0	0.25
76000	1	1	1	0	0	0.075	0	0	0.15
77000	1	1	1	0	0	0.15	0	0	0.075
78000	1	1	1	0	0	0.15	0	0	0
79000	1	1	1	0	0	0.25	0	0	0
80000	1	1	1	0	0	0.25	0	0	0
81000	1	1	1	0	0	0.25	0	0	0
82000	1	1	1	0	0	0.25	0	0	0
83000	1	1	1	0	0	0.175	0	0	0
84000	1	1	1	0	0	0.25	0	0	0
85000	1	1	1	0	0	0.25	0	0	0
86000	1	1	1	0	0	0.25	0	0	0
87000	1	1	1	0	0	0.175	0	0	0
88000	1	1	1	0	0	0.175	0	0	0
89000	1	1	1	0	0	0.15	0	0	0
90000	1	1	1	0	0	0.15	0	0	0
91000	1	1	1	0	0	0.15	0	0	0
92000	1	1	1	0	0	0.15	0	0	0
93000	1	1	1	0	0	0.15	0	0	0
94000	1	1	1	0	0	0.075	0	0	0
95000	1	1	1	0	0	0.075	0	0	0
96000	1	1	1	0	0	0.075	0	0	0
97000	1	1	1	0	0	0.15	0	0	0
98000	1	1	1	0	0	0.15	0	0	0
99000	1	1	1	0	0	0.075	0	0	0
100000	1	1	1	0	0	0.075	0	0	0
101000	1	1	1	0	0	0.075	0	0	0
102000	1	1	1	0	0	0.075	0	0	0
103000	1	1	1	0	0	0.075	0	0	0
104000	1	1	1	0	0	0.075	0	0	0
105000	1	1	1	0	0	0.075	0	0	0
106000	1	1	1	0	0	0.075	0	0	0
107000	1	1	1	0	0	0	0	0	0
108000	1	1	1	0	0	0	0	0	0
109000	1	1	1	0	0	0	0	0	0
110000	1	1	1	0	0	0.075	0	0	0
111000	1	1	1	0	0	0.15	0	0	0
112000	1	1	1	0	0	0.225	0	0	0
113000	1	1	1	0	0	0.3	0	0	0
114000	1	1	1	0	0	0.3	0	0	0
115000	1	1	1	0	0	0.3	0	0	0
116000	1	1	1	0	0	0.3	0	0	0
117000	1	1	1	0	0	0.3	0	0	0
118000	1	1	1	0	0	0.3	0	0	0
119000	1	1	1	0	0	0.4	0	0	0
120000	1	1	1	0	0	0.325	0	0	0
121000	1	1	1	0	0	0.25	0	0	0
122000	1	1	1	0	0	0.175	0	0	0
123000	1	1	1	0	0	0.1	0	0	0
124000	1	1	1	0	0	0.1	0	0	0
125000	1	1	1	0	0	0.2	0	0	0
126000	1	1	1	0	0	0.2	0	0	0
127000	1	1	1	0	0	0.275	0	0	0
128000	1	1	1	0	0	0.275	0	0	0
129000	1	1	1	0	0	0.175	0	0	0
130000	1	1	1	0	0	0.175	0	0	0
131000	1	1	1	0	0	0.175	0	0	0
132000	1	1	1	0	0	0.175	0	0	0
133000	1	1	1	0	0	0.175	0	0	0
134000	1	1	1	0	0	0.175	0	0	0
135000	1	1	1	0	0	0.075	0	0	0
136000	1	1	1	0	0	0.075	0	0	0
137000	1	1	1	0	0	0	0	0	0
138000	1	1	1	0	0	0	0	0	0
139000	1	1	1	0	0	0	0	0	0
140000	1	1	1	0	0	0	0	0	0
141000	1	1	1	0	0	0	0	0	0
142000	1	1	1	0	0	0	0	0	0
143000	1	1	1	0	0	0	0	0	0
144000	1	1	1	0	0	0	0	0	0
145000	1	1	1	0	0	0.075	0	0	0
146000	1	1	1	0	0	0.075	0	0	0
147000	1	1	1	0	0	0.075	0	0	0
148000	1	1	1	0	0	0.075	0	0	0
149000	1	1	1	0	0	0.075	0	0	0
150000	1	1	1	0	0	0.15	0	0	0
151000	1	1	1	0	0	0.15	0	0	0
152000	1	1	1	0	0	0.15	0	0	0
153000	1	1	1	0	0	0.225	0	0	0
154000	1	1	1	0	0	0.225	0	0	0
155000	1	1	1	0	0	0.15	0	0	0
156000	1	1	1	0	0	0.15	0	0	0
157000	1	1	1	0	0	0.15	0	0	0
158000	1	1	1	0	0	0.25	0	0	0
159000	1	1	1	0	0	0.325	0	0	0
160000	1	1	1	0	0	0.25	0	0	0
161000	1	1	1	0	0	0.25	0	0	0
162000	1	1	1	0	0	0.25	0	0	0
163000	1	1	1	0	0	0.175	0	0	0
164000	1	1	1	0	0	0.25	0	0	0
165000	1	1	1	0	0	0.25	0	0	0
166000	1	1	1	0	0	0.25	0	0	0
167000	1	1	1	0	0	0.25	0	0	0
168000	1	1	1	0	0	0.225	0	0	0
169000	1	1	1	0	0	0.15	0	0	0
170000	1	1	1	0	0	0.15	0	0	0
171000	1	1	1	0	0	0.225	0	0	0
172000	1	1	1	0	0	0.225	0	0	0
173000	1	1	1	0	0	0.225	0	0	0
174000	1	1	1	0	0	0.15	0	0	0
175000	1	1	1	0	0	0.225	0	0	0
176000	1	1	1	0	0	0.225	0	0	0
177000	1	1	1	0	0	0.225	0	0	0
178000	1	1	1	0	0	0.225	0	0	0
179000	1	1	1	0	0	0.225	0	0	0
180000	1	1	1	0	0.05	0.325	0	0	0
181000	1	1	1	0	0.05	0.325	0	0	0
182000	1	1	1	0	0.05	0.4	0	0	0
183000	1	1	1	0	0.05	0.475	0	0	0
184000	1	1	1	0	0.05	0.475	0	0	0
185000	1	1	1	0	0.05	0.4	0	0	0
186000	1	1	1	0	0.05	0.4	0	0	0
187000	1	1	1	0	0.05	0.4	0	0	0
188000	1	1	1	0	0.05	0.325	0	0	0
189000	1	1	1	0	0.05	0.325	0	0	0
190000	1	1	1	0	0	0.225	0	0	0
191000	1	1	1	0	0	0.225	0	0	0
192000	1	1	1	0	0	0.15	0	0	0
193000	1	1	1	0	0	0.075	0	0	0
194000	1	1	1	0	0	0.075	0	0	0
195000	1	1	1	0	0	0.075	0	0	0
196000	1	1	1	0	0	0.075	0	0	0
197000	1	1	1	0	0	0.075	0	0	0
198000	1	1	1	0	0	0.075	0	0	0
199000	1	1	1	0	0	0.075	0	0	0
200000	1	1	1	0	0	0.075	0	0	0
201000	1	1	1	0	0	0	0	0	0
202000	1	1	1	0	0	0	0	0	0
203000	1	1	1	0	0	0	0	0	0
204000	1	1	1	0	0	0	0	0	0
205000	1	1	1	0	0	0	0	0	0
206000	1	1	1	0	0	0	0	0	0
207000	1	1	1	0	0	0	0	0	0
208000	1	1	1	0	0	0	0	0	0
209000	1	1	1	0	0	0	0	0	0

## Sheet: t3
0	0	0	0	0	0	0	0	0	0
1000	0	0	0	0	0	0.75	0	0	0
2000	0	0	0	0	0	0.375	0	0	0
3000	0	0	0	0	0	0.25	0	0	0
4000	0	0	0	0	0	0.1875	0	0	0
5000	0	0	0	0	0	0.15	0	0	0.15
6000	0	0	0	0	0	0.125	0	0	0.125
7000	0	0	0	0	0	0.107143	0	0.0714286	0.25
8000	0	0	0	0	0	0.09375	0	0.125	0.34375
9000	0	0	0	0	0	0.0833333	0	0.111111	0.416667
10000	0	0	0	0	0	0.075	0	0.1	0.375
11000	0	0	0	0	0	0	0	0.1	0.375
12000	0	0	0	0	0	0	0	0.1	0.375
13000	0	0	0	0	0	0.075	0	0.1	0.45
14000	0	0	0	0	0	0.075	0	0.1	0.525
15000	0	0	0	0	0	0.075	0	0.1	0.45
16000	0	0	0	0	0	0.075	0	0.1	0.45
17000	0	0	0	0	0	0.075	0	0.05	0.35
18000	0	0	0	0	0	0.075	0	0	0.25
19000	0	0	0	0	0	0.075	0	0	0.15
20000	0	0	0	0	0	0.15	0	0	0.15
21000	0	0	0	0	0	0.225	0	0	0.15
22000	0	0	0	0	0	0.225	0	0	0.15
23000	0	0	0	0	0	0.225	0	0	0.075
24000	0	0	0	0	0	0.225	0	0	0
25000	0	0	0	0	0	0.225	0	0	0
26000	0	0	0	0	0	0.225	0	0	0
27000	0	0	0	0	0	0.225	0	0	0.075
28000	0	0	0	0	0	0.3	0	0	0.075
29000	0	0	0	0	0	0.3	0	0	0.075
30000	0	0	0	0	0	0.3	0	0	0.075
31000	0	0	0	0	0	0.225	0	0	0.075
32000	0	0	0	0	0	0.225	0	0	0.075
33000	0	0	0	0	0	0.15	0	0	0.075
34000	0	0	0	0	0	0.15	0	0	0.075
35000	0	0	0.1	0	0	0.15	0	0	0.075
36000	0	0	0.1	0	0	0.15	0	0	0.075
37000	0	0	0.1	0	0	0.15	0	0	0.075
38000	0	0	0.1	0	0	0.075	0	0	0.075
39000	0	0	0.1	0	0	0.075	0	0	0.075
40000	0	0	0.1	0	0	0	0	0	0.075
41000	0	0	0.1	0	0	0	0	0	0.075
42000	0	0	0.1	0	0	0	0	0	0.075
43000	0	0	0.175	0	0	0	0	0	0.075
44000	0	0	0.175	0	0	0	0	0	0.075
45000	0	0	0.075	0	0	0.075	0	0	0.075
46000	0	0	0.075	0	0	0.075	0	0	0.075
47000	0	0	0.075	0	0	0.075	0	0	0
48000	0	0	0.075	0	0	0.075	0	0	0
49000	0	0	0.075	0	0	0.075	0	0	0
50000	0	0	0.075	0	0	0.075	0	0	0
51000	0	0	0.075	0	0	0.075	0	0	0
52000	0	0	0.075	0	0	0.075	0	0	0
53000	0	0	0.075	0	0	0.15	0	0	0.1
54000	0	0	0.075	0	0	0.15	0	0	0.1
55000	0	0	0.075	0	0.05	0.175	0	0	0.1
56000	0	0	0.075	0	0.05	0.175	0	0	0.1
57000	0	0	0.075	0	0.05	0.25	0	0	0.1
58000	0	0	0.075	0	0.05	0.25	0	0	0.1
59000	0	0	0.15	0	0.05	0.25	0	0	0.1
60000	0	0	0.225	0	0.05	0.25	0	0	0.1
61000	0	0	0.225	0	0.05	0.25	0	0	0.1
62000	0	0	0.3	0	0.05	0.25	0	0	0.1
63000	0	0	0.3	0	0.05	0.175	0	0	0
64000	0	0	0.3	0	0.05	0.175	0	0	0
65000	0	0	0.3	0	0	0.075	0	0	0
66000	0	0	0.3	0	0	0.075	0	0	0
67000	0	0	0.3	0	0	0	0	0	0
68000	0	0	0.375	0	0	0	0	0	0
69000	0	0	0.375	0	0	0	0	0	0
70000	0	0	0.3	0	0	0	0	0	0
71000	0	0	0.4	0	0	0	0	0	0
72000	0	0	0.425	0	0	0	0	0	0
73000	0	0.05	0.45	0	0	0.075	0	0	0
74000	0	0.1	0.55	0	0	0.075	0	0	0
75000	0	0.15	0.65	0	0	0.075	0	0	0
76000	0	0.15	0.75	0	0	0.075	0	0	0
77000	0	0.2	0.85	0	0	0.075	0	0	0
78000	0	0.25	0.875	0	0	0.075	0	0	0
79000	0	0.3	0.9	0	0	0.075	0	0	0
80000	0.025	0.4	1	0	0	0.075	0	0	0
81000	0.025	0.5	1	0	0	0.075	0	0	0
82000	0.025	0.6	1	0	0	0.175	0	0	0
83000	0.025	0.65	1	0	0	0.1	0	0	0
84000	0.05	0.7	1	0	0	0.1	0	0	0
85000	0.075	0.75	1	0	0	0.1	0	0	0
86000	0.1	0.85	1	0	0	0.1	0	0	0
87000	0.125	0.9	1	0	0	0.1	0	0	0
88000	0.225	0.95	1	0	0	0.1	0	0	0
89000	0.25	1	1	0	0	0.1	0	0	0
90000	0.325	1	1	0	0	0.175	0	0	0
91000	0.425	1	1	0	0	0.25	0	0	0
92000	0.525	1	1	0	0	0.15	0	0	0
93000	0.625	1	1	0	0	0.25	0	0	0
94000	0.7	1	1	0	0	0.25	0	0	0
95000	0.775	1	1	0	0	0.25	0	0	0
96000	0.85	1	1	0	0	0.25	0	0	0
97000	0.925	1	1	0	0	0.25	0	0	0
98000	0.925	1	1	0	0	0.325	0	0	0
99000	1	1	1	0	0	0.325	0	0	0
100000	1	1	1	0	0.05	0.35	0	0	0
101000	1	1	1	0	0.05	0.275	0	0	0
102000	1	1	1	0	0.05	0.275	0	0	0
103000	1	1	1	0	0.05	0.25	0	0	0
104000	1	1	1	0	0.05	0.25	0	0	0
105000	1	1	1	0	0.05	0.25	0	0	0
106000	1	1	1	0	0.05	0.25	0	0	0
107000	1	1	1	0	0.05	0.25	0	0	0
108000	1	1	1	0	0.05	0.175	0	0	0
109000	1	1	1	0	0.05	0.175	0	0	0
110000	1	1	1	0	0	0.15	0	0	0
111000	1	1	1	0	0	0.15	0	0	0
112000	1	1	1	0	0	0.225	0	0	0
113000	1	1	1	0	0	0.15	0	0	0
114000	1	1	1	0	0	0.15	0	0	0
115000	1	1	1	0	0	0.15	0	0	0
116000	1	1	1	0	0	0.15	0	0	0
117000	1	1	1	0	0	0.15	0	0	0
118000	1	1	1	0	0	0.15	0	0	0
119000	1	1	1	0	0	0.15	0	0	0
120000	1	1	1	0	0	0.075	0	0	0
121000	1	1	1	0	0	0.075	0	0	0
122000	1	1	1	0	0	0	0	0	0
123000	1	1	1	0	0	0.075	0	0	0
124000	1	1	1	0	0	0.075	0	0	0
125000	1	1	1	0	0	0.075	0	0	0
126000	1	1	1	0	0	0.075	0	0	0
127000	1	1	1	0	0	0.075	0	0	0
128000	1	1	1	0	0	0.075	0	0	0
129000	1	1	1	0	0	0.075	0	0	0
130000	1	1	1	0	0	0.075	0	0	0
131000	1	1	1	0	0	0.075	0	0	0
132000	1	1	1	0	0	0.075	0	0	0
133000	1	1	1	0	0	0	0	0	0
134000	1	1	1	0	0	0	0	0	0
135000	1	1	1	0	0	0	0	0	0
136000	1	1	1	0	0	0	0	0	0
137000	1	1	1	0	0	0	0	0	0
138000	1	1	1	0	0	0	0	0	0
139000	1	1	1	0	0	0	0	0	0
140000	1	1	1	0	0	0	0	0	0
141000	1	1	1	0	0	0.075	0	0	0
142000	1	1	1	0	0	0.075	0	0	0
143000	1	1	1	0	0	0.075	0	0	0
144000	1	1	1	0	0	0.075	0	0	0
145000	1	1	1	0	0	0.175	0	0	0
146000	1	1	1	0	0	0.175	0	0	0
147000	1	1	1	0	0	0.25	0	0	0
148000	1	1	1	0	0	0.25	0	0	0
149000	1	1	1	0	0	0.25	0	0	0
150000	1	1	1	0	0	0.25	0	0	0
151000	1	1	1	0	0	0.175	0	0	0
152000	1	1	1	0	0	0.175	0	0	0
153000	1	1	1	0	0	0.25	0	0	0
154000	1	1	1	0	0	0.25	0	0	0
155000	1	1	1	0	0	0.15	0	0	0
156000	1	1	1	0	0	0.15	0	0	0
157000	1	1	1	0	0	0.075	0	0	0
158000	1	1	1	0	0	0.075	0	0	0
159000	1	1	1	0	0	0.075	0	0	0
160000	1	1	1	0	0	0.075	0	0	0
161000	1	1	1	0	0	0.075	0	0	0
162000	1	1	1	0	0	0.075	0	0	0
163000	1	1	1	0	0	0.075	0	0	0
164000	1	1	1	0	0	0.075	0	0	0
165000	1	1	1	0	0	0.075	0	0	0
166000	1	1	1	0	0	0.075	0	0	0
167000	1	1	1	0	0	0.15	0	0	0
168000	1	1	1	0	0	0.15	0	0	0
169000	1	1	1	0	0	0.15	0	0	0
170000	1	1	1	0	0	0.15	0	0	0
171000	1	1	1	0	0	0.15	0	0	0
172000	1	1	1	0	0	0.15	0	0	0
173000	1	1	1	0	0	0.075	0	0	0
174000	1	1	1	0	0	0.075	0	0	0
175000	1	1	1	0	0	0.075	0	0	0
176000	1	1	1	0	0	0.075	0	0	0
177000	1	1	1	0	0	0	0	0	0
178000	1	1	1	0	0	0	0	0	0
179000	1	1	1	0	0	0.1	0	0	0
180000	1	1	1	0	0	0.1	0	0	0
181000	1	1	1	0	0	0.1	0	0	0
182000	1	1	1	0	0	0.1	0	0	0
183000	1	1	1	0	0	0.1	0	0	0
184000	1	1	1	0	0	0.1	0	0	0
185000	1	1	1	0	0	0.1	0	0	0
186000	1	1	1	0	0	0.1	0	0	0
187000	1	1	1	0	0	0.175	0	0	0
188000	1	1	1	0	0	0.25	0	0	0
189000	1	1	1	0	0	0.15	0	0	0
190000	1	1	1	0	0	0.225	0	0	0
191000	1	1	1	0	0	0.3	0	0	0
192000	1	1	1	0	0	0.3	0	0	0
193000	1	1	1	0	0	0.3	0	0	0
194000	1	1	1	0	0	0.4	0	0	0
195000	1	1	1	0	0	0.4	0	0	0
196000	1	1	1	0	0	0.4	0	0	0
197000	1	1	1	0	0	0.325	0	0	0
198000	1	1	1	0	0	0.25	0	0	0
199000	1	1	1	0	0	0.25	0	0	0
200000	1	1	1	0	0	0.175	0	0	0
201000	1	1	1	0	0	0.111111	0	0	0
202000	1	1	1	0	0	0.125	0	0	0
203000	1	1	1	0	0	0.142857	0	0	0
204000	1	1	1	0	0	0	0	0	0
205000	1	1	1	0	0	0	0	0	0
206000	1	1	1	0	0	0	0	0	0
207000	1	1	1	0	0	0	0	0	0
208000	1	1	1	0	0	0	0	0	0
209000	1	1	1	0	0	0	0	0	0

## Sheet: t4
0	0	0	0	0	0	0	0	0	0
1000	0	0	0	0	0	0.75	0	0	0
2000	0	0	0	0	0	0.375	0	0	0
3000	0	0	0	0	0	0.25	0	0	0
4000	0	0	0	0	0	0.1875	0	0	0
5000	0	0	0	0	0	0.15	0	0	0
6000	0	0	0	0	0	0.125	0	0	0
7000	0	0	0	0	0	0.107143	0	0	0
8000	0	0	0	0	0	0.09375	0	0	0
9000	0	0	0	0	0	0.0833333	0	0	0.0833333
10000	0	0	0	0	0	0.075	0	0	0.075
11000	0	0	0	0	0	0	0	0	0.075
12000	0	0	0	0	0	0	0	0	0.075
13000	0	0	0	0	0	0	0	0	0.075
14000	0	0	0	0	0	0	0	0	0.075
15000	0	0	0	0	0	0	0	0	0.075
16000	0	0	0	0	0	0	0	0	0.075
17000	0	0	0	0	0	0	0	0	0.075
18000	0	0	0	0	0	0	0	0	0.075
19000	0	0	0	0	0	0	0	0	0.075
20000	0	0	0	0	0	0	0	0	0.075
21000	0	0	0	0	0	0	0	0	0.075
22000	0	0	0	0	0	0	0	0	0.075
23000	0	0	0	0	0	0.075	0	0	0.075
24000	0	0	0	0	0	0.075	0	0	0.075
25000	0	0	0	0	0	0.075	0	0	0.075
26000	0	0	0	0	0	0.075	0	0	0.075
27000	0	0	0.1	0	0	0.15	0	0	0.075
28000	0	0	0.1	0	0	0.225	0	0	0.075
29000	0	0	0.1	0	0	0.225	0	0	0
30000	0	0	0.175	0	0	0.225	0	0	0
31000	0	0	0.175	0	0	0.325	0	0	0.075
32000	0	0	0.175	0	0	0.325	0	0	0.075
33000	0	0	0.175	0	0	0.25	0	0	0.075
34000	0	0	0.175	0	0	0.35	0	0	0.075
35000	0	0	0.175	0	0	0.35	0	0	0.075
36000	0	0	0.25	0	0	0.425	0	0	0.075
37000	0	0	0.15	0	0	0.35	0	0	0.075
38000	0	0	0.15	0	0	0.35	0	0	0.075
39000	0	0	0.15	0	0	0.35	0	0	0.075
40000	0	0	0.075	0	0	0.425	0	0	0.075
41000	0	0	0.175	0	0	0.325	0	0	0
42000	0	0	0.175	0	0	0.325	0	0	0
43000	0	0	0.275	0	0	0.325	0	0	0
44000	0	0.05	0.375	0	0	0.225	0	0	0
45000	0	0.1	0.475	0	0	0.225	0	0	0
46000	0	0.15	0.5	0	0	0.15	0	0	0
47000	0	0.2	0.6	0	0	0.15	0	0	0
48000	0	0.3	0.7	0	0	0.075	0	0	0
49000	0	0.3	0.8	0	0	0.075	0	0	0
50000	0	0.35	0.9	0	0	0	0	0	0
51000	0	0.4	0.9	0	0	0	0	0	0
52000	0	0.4	1	0	0	0	0	0	0
53000	0	0.5	1	0	0	0	0	0	0
54000	0.025	0.55	1	0	0	0	0	0	0
55000	0.025	0.5	1	0	0	0.1	0	0	0
56000	0.025	0.55	1	0	0	0.1	0	0	0
57000	0.025	0.6	1	0	0	0.1	0	0	0
58000	0.025	0.6	1	0	0	0.1	0	0	0
59000	0.025	0.7	1	0	0	0.1	0	0	0
60000	0.025	0.75	1	0	0	0.1	0	0	0
61000	0.025	0.8	1	0	0	0.1	0	0	0
62000	0.05	0.9	1	0	0	0.1	0	0	0
63000	0.075	0.9	1	0	0	0.1	0	0	0
64000	0.075	0.9	1	0	0	0.175	0	0	0.075
65000	0.175	1	1	0	0	0.075	0	0	0.075
66000	0.275	1	1	0	0	0.075	0	0	0.075
67000	0.375	1	1	0	0	0.15	0	0	0.075
68000	0.475	1	1	0	0	0.15	0	0	0.075
69000	0.575	1	1	0	0	0.15	0	0	0.075
70000	0.675	1	1	0	0	0.15	0	0	0.075
71000	0.775	1	1	0	0	0.15	0	0	0.075
72000	0.85	1	1	0	0	0.15	0	0	0.075
73000	0.925	1	1	0	0	0.15	0	0	0.075
74000	1	1	1	0	0	0.15	0	0	0
75000	1	1	1	0	0	0.15	0	0	0
76000	1	1	1	0	0	0.15	0	0	0
77000	1	1	1	0	0	0.075	0	0	0
78000	1	1	1	0	0	0.075	0	0	0
79000	1	1	1	0	0	0.075	0	0	0
80000	1	1	1	0	0	0.075	0	0	0
81000	1	1	1	0	0	0.075	0	0	0
82000	1	1	1	0	0	0.075	0	0	0
83000	1	1	1	0	0	0.075	0	0	0
84000	1	1	1	0	0	0.075	0	0	0
85000	1	1	1	0	0	0.15	0	0	0
86000	1	1	1	0	0	0.15	0	0	0
87000	1	1	1	0	0	0.15	0	0	0
88000	1	1	1	0	0	0.25	0	0	0
89000	1	1	1	0	0	0.25	0	0	0
90000	1	1	1	0	0	0.25	0	0	0
91000	1	1	1	0	0	0.25	0	0	0
92000	1	1	1	0	0	0.25	0	0	0
93000	1	1	1	0	0	0.25	0	0	0
94000	1	1	1	0	0	0.175	0	0	0
95000	1	1	1	0	0	0.175	0	0	0
96000	1	1	1	0	0	0.175	0	0	0
97000	1	1	1	0	0	0.175	0	0	0
98000	1	1	1	0	0	0.075	0	0	0
99000	1	1	1	0	0	0.075	0	0	0
100000	1	1	1	0	0	0.075	0	0	0
101000	1	1	1	0	0	0.075	0	0	0
102000	1	1	1	0	0	0.075	0	0	0
103000	1	1	1	0	0	0.075	0	0	0
104000	1	1	1	0	0	0.075	0	0	0
105000	1	1	1	0	0	0	0	0	0
106000	1	1	1	0	0	0	0	0	0
107000	1	1	1	0	0	0.075	0	0	0
108000	1	1	1	0	0	0.075	0	0	0
109000	1	1	1	0	0	0.075	0	0	0
110000	1	1	1	0	0	0.175	0	0	0
111000	1	1	1	0	0	0.175	0	0	0
112000	1	1	1	0	0	0.175	0	0	0
113000	1	1	1	0	0	0.175	0	0	0
114000	1	1	1	0	0	0.25	0	0	0
115000	1	1	1	0	0	0.35	0	0	0
116000	1	1	1	0	0	0.35	0	0	0
117000	1	1	1	0	0	0.35	0	0	0
118000	1	1	1	0	0	0.35	0	0	0
119000	1	1	1	0	0	0.425	0	0	0
120000	1	1	1	0	0	0.325	0	0	0
121000	1	1	1	0	0	0.325	0	0	0
122000	1	1	1	0	0	0.325	0	0	0
123000	1	1	1	0	0	0.325	0	0	0
124000	1	1	1	0	0	0.25	0	0	0
125000	1	1	1	0	0	0.225	0	0	0
126000	1	1	1	0	0	0.225	0	0	0
127000	1	1	1	0	0	0.15	0	0	0
128000	1	1	1	0	0	0.15	0	0	0
129000	1	1	1	0	0	0.15	0	0	0
130000	1	1	1	0	0	0.15	0	0	0
131000	1	1	1	0	0	0.15	0	0	0
132000	1	1	1	0	0	0.15	0	0	0
133000	1	1	1	0	0	0.25	0	0	0
134000	1	1	1	0	0	0.25	0	0	0
135000	1	1	1	0	0	0.275	0	0	0
136000	1	1	1	0	0	0.275	0	0	0
137000	1	1	1	0	0	0.35	0	0	0
138000	1	1	1	0	0	0.45	0	0	0
139000	1	1	1	0	0	0.375	0	0	0
140000	1	1	1	0	0	0.375	0	0	0
141000	1	1	1	0	0	0.375	0	0	0
142000	1	1	1	0	0	0.375	0	0	0
143000	1	1	1	0	0	0.35	0	0	0
144000	1	1	1	0	0	0.35	0	0	0
145000	1	1	1	0	0	0.325	0	0	0.075
146000	1	1	1	0	0	0.325	0	0	0.075
147000	1	1	1	0	0	0.25	0	0	0.075
148000	1	1	1	0	0	0.15	0	0	0.075
149000	1	1	1	0	0	0.15	0	0	0.075
150000	1	1	1	0	0	0.15	0	0	0.075
151000	1	1	1	0	0	0.15	0	0	0.075
152000	1	1	1	0	0	0.15	0	0	0.075
153000	1	1	1	0	0	0.075	0	0	0.075
154000	1	1	1	0	0	0.075	0	0	0.075
155000	1	1	1	0	0	0	0	0	0
156000	1	1	1	0	0	0	0	0	0
157000	1	1	1	0	0	0	0	0	0
158000	1	1	1	0	0	0	0	0	0
159000	1	1	1	0	0	0	0	0	0
160000	1	1	1	0	0	0	0	0	0
161000	1	1	1	0	0	0.075	0	0	0
162000	1	1	1	0	0	0.075	0	0	0
163000	1	1	1	0	0	0.075	0	0	0
164000	1	1	1	0	0	0.15	0	0	0
165000	1	1	1	0	0	0.225	0	0	0
166000	1	1	1	0	0	0.325	0	0	0
167000	1	1	1	0	0	0.325	0	0	0
168000	1	1	1	0	0	0.425	0	0	0
169000	1	1	1	0	0	0.425	0	0	0
170000	1	1	1	0	0	0.425	0	0	0
171000	1	1	1	0	0	0.425	0	0	0
172000	1	1	1	0	0	0.425	0	0	0
173000	1	1	1	0	0	0.425	0	0	0
174000	1	1	1	0	0	0.35	0	0	0
175000	1	1	1	0	0	0.275	0	0	0
176000	1	1	1	0	0	0.175	0	0	0
177000	1	1	1	0	0	0.175	0	0	0
178000	1	1	1	0	0	0.175	0	0	0
179000	1	1	1	0	0	0.175	0	0	0
180000	1	1	1	0	0	0.175	0	0	0
181000	1	1	1	0	0.05	0.2	0	0	0
182000	1	1	1	0	0.05	0.2	0	0	0
183000	1	1	1	0	0.05	0.2	0	0	0
184000	1	1	1	0	0.05	0.2	0	0	0
185000	1	1	1	0	0.05	0.2	0	0	0
186000	1	1	1	0	0.05	0.275	0	0	0
187000	1	1	1	0	0.05	0.275	0	0	0
188000	1	1	1	0	0.05	0.275	0	0	0
189000	1	1	1	0	0.05	0.375	0	0	0
190000	1	1	1	0	0.05	0.375	0	0	0
191000	1	1	1	0	0	0.275	0	0	0
192000	1	1	1	0	0	0.35	0	0	0
193000	1	1	1	0	0	0.35	0	0	0
194000	1	1	1	0	0	0.35	0	0	0
195000	1	1	1	0	0	0.35	0	0	0
196000	1	1	1	0	0	0.275	0	0	0
197000	1	1	1	0	0	0.275	0	0	0
198000	1	1	1	0	0	0.175	0	0	0
199000	1	1	1	0	0	0.075	0	0	0
200000	1	1	1	0	0	0.075	0	0	0
201000	1	1	1	0	0	0.0833333	0	0	0
202000	1	1	1	0	0	0	0	0	0
203000	1	1	1	0	0	0	0	0	0
204000	1	1	1	0	0	0	0	0	0
205000	1	1	1	0	0	0	0	0	0
206000	1	1	1	0	0	0	0	0	0
207000	1	1	1	0	0	0	0	0	0
208000	1	1	1	0	0	0	0	0	0
209000	1	1	1	0	0	0	0	0	0

## Sheet: all
0	0	0	0	0	0	0	0	0	0
1000	0	0	0	0	0	0.75	0	0	0
2000	0	0	0	0	0.125	0.5	0	0	0
3000	0	0	0	0	0.0833333	0.395833	0	0	0
4000	0	0	0	0.015625	0.125	0.359375	0.0625	0.0625	0.0625
5000	0	0	0	0.0125	0.1	0.3375	0.1	0.1	0.1875
6000	0	0	0	0.0104167	0.0833333	0.322917	0.125	0.166667	0.239583
7000	0	0	0	0.0178571	0.107143	0.3125	0.142857	0.196429	0.276786
8000	0	0	0	0.015625	0.09375	0.328125	0.15625	0.25	0.335938
9000	0	0	0	0.0208333	0.111111	0.319444	0.166667	0.263889	0.402778
10000	0	0	0.01875	0.01875	0.1125	0.3125	0.175	0.2625	0.40625
11000	0	0	0.0170455	0.0170455	0.126136	0.282386	0.181818	0.269318	0.431818
12000	0	0	0.0340909	0.0170455	0.1375	0.288068	0.204545	0.292045	0.454545
13000	0.0227273	0.0227273	0.0568182	0.0397727	0.1375	0.306818	0.227273	0.314773	0.514773
14000	0.0454545	0.0454545	0.0795455	0.0454545	0.160227	0.3125	0.25	0.3375	0.55625
15000	0.0681818	0.0681818	0.102273	0.0397727	0.1375	0.3125	0.25	0.3375	0.5125
16000	0.0909091	0.0909091	0.125	0.0397727	0.1375	0.314773	0.232955	0.3125	0.50625
17000	0.113636	0.113636	0.147727	0.0397727	0.1375	0.309091	0.232955	0.325	0.50625
18000	0.136364	0.136364	0.170455	0.0568182	0.1375	0.290341	0.232955	0.2875	0.45625
19000	0.159091	0.159091	0.193182	0.0568182	0.148864	0.309091	0.232955	0.275	0.425
20000	0.181818	0.181818	0.215909	0.0511364	0.148864	0.327841	0.232955	0.275	0.40625
21000	0.204545	0.204545	0.221591	0.0568182	0.147727	0.321591	0.232955	0.275	0.3875
22000	0.227273	0.227273	0.244318	0.0625	0.159091	0.321591	0.215909	0.275	0.3875
23000	0.25	0.25	0.25	0.0852273	0.170455	0.359091	0.215909	0.275	0.35
24000	0.25	0.25	0.25	0.0625	0.159091	0.359091	0.215909	0.275	0.33125
25000	0.25	0.25	0.25	0.0568182	0.136364	0.359091	0.215909	0.275	0.35
26000	0.25	0.25	0.25	0.0795455	0.159091	0.334091	0.215909	0.275	0.33125
27000	0.25	0.25	0.275	0.102273	0.181818	0.375568	0.232955	0.25	0.34375
28000	0.25	0.25	0.275	0.102273	0.193182	0.41875	0.232955	0.25	0.34375
29000	0.25	0.25	0.29375	0.0795455	0.170455	0.394318	0.232955	0.25	0.30625
30000	0.25	0.25	0.33125	0.102273	0.181818	0.394318	0.232955	0.25	0.30625
31000	0.25	0.25	0.35625	0.125	0.181818	0.400568	0.232955	0.25	0.325
32000	0.25	0.2625	0.38125	0.119318	0.181818	0.400568	0.232955	0.25	0.325
33000	0.25	0.2875	0.40625	0.119318	0.181818	0.363068	0.25	0.25	0.34375
34000	0.275	0.3125	0.43125	0.102273	0.181818	0.388068	0.25	0.25	0.34375
35000	0.3	0.3375	0.48125	0.102273	0.193182	0.388068	0.25	0.25	0.325
36000	0.325	0.3625	0.525	0.125	0.215909	0.406818	0.25	0.25	0.325
37000	0.35	0.3875	0.525	0.125	0.215909	0.388068	0.25	0.25	0.325
38000	0.375	0.4125	0.55	0.125	0.215909	0.369318	0.25	0.25	0.325
39000	0.4	0.4375	0.55625	0.125	0.227273	0.369318	0.25	0.25	0.325
40000	0.425	0.4625	0.54375	0.147727	0.25	0.375	0.25	0.25	0.325
41000	0.45	0.4875	0.56875	0.125	0.25	0.36875	0.25	0.25	0.30625
42000	0.475	0.5	0.56875	0.102273	0.25	0.3875	0.25	0.25	0.30625
43000	0.5	0.5	0.6125	0.102273	0.25	0.36875	0.232955	0.25	0.2875
44000	0.5	0.5125	0.6375	0.119318	0.25	0.34375	0.232955	0.25	0.2875
45000	0.5	0.525	0.6375	0.136364	0.25	0.3625	0.232955	0.25	0.2875
46000	0.5	0.5375	0.64375	0.136364	0.25	0.34375	0.215909	0.25	0.2875
47000	0.5	0.55	0.66875	0.136364	0.25	0.34375	0.215909	0.25	0.25
48000	0.5	0.575	0.69375	0.136364	0.25	0.325	0.215909	0.25	0.25
49000	0.5	0.575	0.71875	0.113636	0.227273	0.302273	0.215909	0.25	0.25
50000	0.5	0.5875	0.74375	0.136364	0.227273	0.283523	0.215909	0.25	0.25
51000	0.5	0.6	0.74375	0.136364	0.227273	0.264773	0.215909	0.25	0.25
52000	0.5	0.6	0.76875	0.142045	0.227273	0.264773	0.215909	0.25	0.25
53000	0.5	0.625	0.76875	0.147727	0.227273	0.283523	0.215909	0.25	0.3
54000	0.50625	0.6375	0.76875	0.170455	0.227273	0.283523	0.232955	0.25	0.3
55000	0.50625	0.625	0.76875	0.153409	0.239773	0.333523	0.232955	0.25	0.3
56000	0.50625	0.6375	0.76875	0.153409	0.239773	0.358523	0.210227	0.25	0.3
57000	0.50625	0.65	0.76875	0.176136	0.239773	0.377273	0.227273	0.25	0.3
58000	0.50625	0.65	0.76875	0.159091	0.239773	0.377273	0.227273	0.25	0.3
59000	0.50625	0.675	0.7875	0.159091	0.239773	0.377273	0.227273	0.25	0.3
60000	0.50625	0.6875	0.80625	0.181818	0.2625	0.4	0.227273	0.25	0.3
61000	0.50625	0.7	0.80625	0.181818	0.2625	0.41875	0.227273	0.25	0.3
62000	0.5125	0.725	0.825	0.181818	0.2625	0.4	0.227273	0.25	0.3
63000	0.51875	0.725	0.825	0.198864	0.2625	0.38125	0.227273	0.25	0.25
64000	0.51875	0.725	0.825	0.215909	0.2625	0.4	0.227273	0.25	0.26875
65000	0.54375	0.75	0.825	0.215909	0.25	0.33125	0.227273	0.25	0.26875
66000	0.56875	0.75	0.825	0.232955	0.25	0.30625	0.227273	0.25	0.29375
67000	0.59375	0.75	0.825	0.232955	0.25	0.30625	0.25	0.25	0.3125
68000	0.61875	0.75	0.84375	0.232955	0.25	0.30625	0.25	0.25	0.33125
69000	0.64375	0.75	0.84375	0.25	0.25	0.30625	0.25	0.25	0.33125
70000	0.66875	0.75	0.825	0.232955	0.25	0.30625	0.25	0.25	0.33125
71000	0.69375	0.75	0.85	0.232955	0.25	0.2875	0.25	0.25	0.33125
72000	0.7125	0.75	0.85625	0.232955	0.25	0.2875	0.25	0.25	0.33125
73000	0.73125	0.7625	0.8625	0.232955	0.25	0.325	0.25	0.25	0.33125
74000	0.75	0.775	0.8875	0.232955	0.25	0.325	0.25	0.25	0.3125
75000	0.75	0.7875	0.9125	0.232955	0.25	0.325	0.25	0.25	0.3125
76000	0.75	0.7875	0.9375	0.232955	0.25	0.325	0.25	0.25	0.2875
77000	0.75	0.8	0.9625	0.232955	0.25	0.325	0.25	0.25	0.26875
78000	0.75	0.8125	0.96875	0.215909	0.25	0.325	0.25	0.25	0.25
79000	0.75	0.825	0.975	0.215909	0.25	0.35	0.232955	0.25	0.25
80000	0.75625	0.85	1	0.215909	0.25	0.35	0.232955	0.25	0.25
81000	0.75625	0.875	1	0.232955	0.25	0.35	0.232955	0.25	0.25
82000	0.75625	0.9	1	0.232955	0.25	0.375	0.232955	0.25	0.25
83000	0.75625	0.9125	1	0.232955	0.25	0.3375	0.232955	0.25	0.25
84000	0.7625	0.925	1	0.232955	0.25	0.35625	0.232955	0.25	0.25
85000	0.76875	0.9375	1	0.232955	0.25	0.375	0.232955	0.25	0.25
86000	0.775	0.9625	1	0.232955	0.25	0.375	0.232955	0.25	0.25
87000	0.78125	0.975	1	0.232955	0.25	0.35625	0.232955	0.25	0.25
88000	0.80625	0.9875	1	0.232955	0.25	0.38125	0.232955	0.25	0.25
89000	0.8125	1	1	0.25	0.25	0.375	0.232955	0.25	0.25
90000	0.83125	1	1	0.25	0.25	0.39375	0.25	0.25	0.25
91000	0.85625	1	1	0.232955	0.25	0.4125	0.25	0.25	0.25
92000	0.88125	1	1	0.232955	0.25	0.3875	0.25	0.25	0.25
93000	0.90625	1	1	0.210227	0.238636	0.4125	0.25	0.25	0.25
94000	0.925	1	1	0.210227	0.238636	0.375	0.25	0.25	0.25
95000	0.94375	1	1	0.210227	0.238636	0.375	0.25	0.25	0.25
96000	0.9625	1	1	0.210227	0.238636	0.375	0.25	0.25	0.25
97000	0.98125	1	1	0.210227	0.238636	0.39375	0.25	0.25	0.25
98000	0.98125	1	1	0.210227	0.238636	0.3875	0.25	0.25	0.25
99000	1	1	1	0.210227	0.238636	0.36875	0.25	0.25	0.25
100000	1	1	1	0.210227	0.251136	0.375	0.25	0.25	0.25
101000	1	1	1	0.210227	0.251136	0.35625	0.25	0.25	0.25
102000	1	1	1	0.227273	0.251136	0.35625	0.25	0.25	0.25
103000	1	1	1	0.227273	0.251136	0.35	0.25	0.25	0.25
104000	1	1	1	0.25	0.2625	0.35	0.25	0.25	0.25
105000	1	1	1	0.25	0.2625	0.33125	0.25	0.25	0.25
106000	1	1	1	0.25	0.2625	0.33125	0.25	0.25	0.25
107000	1	1	1	0.25	0.2625	0.33125	0.232955	0.25	0.25
108000	1	1	1	0.25	0.2625	0.3125	0.210227	0.25	0.25
109000	1	1	1	0.25	0.2625	0.3125	0.1875	0.25	0.25
110000	1	1	1	0.25	0.25	0.35	0.1875	0.25	0.25
111000	1	1	1	0.25	0.25	0.36875	0.1875	0.25	0.25
112000	1	1	1	0.25	0.25	0.40625	0.1875	0.25	0.25
113000	1	1	1	0.25	0.25	0.40625	0.1875	0.25	0.25
114000	1	1	1	0.25	0.25	0.425	0.1875	0.25	0.25
115000	1	1	1	0.25	0.25	0.45	0.1875	0.25	0.25
116000	1	1	1	0.25	0.25	0.45	0.1875	0.25	0.25
117000	1	1	1	0.25	0.25	0.45	0.1875	0.25	0.25
118000	1	1	1	0.25	0.25	0.45	0.204545	0.25	0.25
119000	1	1	1	0.25	0.25	0.49375	0.227273	0.25	0.25
120000	1	1	1	0.25	0.25	0.43125	0.25	0.25	0.25
121000	1	1	1	0.25	0.25	0.4125	0.25	0.25	0.25
122000	1	1	1	0.25	0.25	0.375	0.25	0.25	0.25
123000	1	1	1	0.25	0.25	0.375	0.25	0.25	0.25
124000	1	1	1	0.25	0.25	0.35625	0.25	0.25	0.25
125000	1	1	1	0.25	0.25	0.375	0.25	0.25	0.25
126000	1	1	1	0.232955	0.25	0.375	0.25	0.25	0.25
127000	1	1	1	0.215909	0.25	0.375	0.25	0.25	0.25
128000	1	1	1	0.215909	0.25	0.375	0.25	0.25	0.25
129000	1	1	1	0.215909	0.25	0.35	0.25	0.25	0.25
130000	1	1	1	0.215909	0.25	0.35	0.25	0.25	0.25
131000	1	1	1	0.215909	0.25	0.35	0.25	0.25	0.25
132000	1	1	1	0.198864	0.25	0.35	0.25	0.25	0.25
133000	1	1	1	0.198864	0.25	0.35625	0.25	0.25	0.25
134000	1	1	1	0.198864	0.25	0.35625	0.25	0.25	0.25
135000	1	1	1	0.198864	0.25	0.3375	0.25	0.25	0.25
136000	1	1	1	0.198864	0.25	0.3375	0.25	0.25	0.25
137000	1	1	1	0.215909	0.25	0.3375	0.25	0.25	0.25
138000	1	1	1	0.232955	0.25	0.3625	0.25	0.25	0.25
139000	1	1	1	0.215909	0.25	0.34375	0.25	0.25	0.25
140000	1	1	1	0.215909	0.25	0.34375	0.25	0.25	0.25
141000	1	1	1	0.215909	0.25	0.3625	0.25	0.25	0.25
142000	1	1	1	0.215909	0.25	0.3625	0.25	0.25	0.25
143000	1	1	1	0.232955	0.25	0.35625	0.232955	0.25	0.25
144000	1	1	1	0.232955	0.25	0.35625	0.210227	0.238636	0.25
145000	1	1	1	0.232955	0.25	0.39375	0.210227	0.238636	0.26875
146000	1	1	1	0.232955	0.25	0.39375	0.210227	0.238636	0.26875
147000	1	1	1	0.232955	0.25	0.39375	0.193182	0.238636	0.26875
148000	1	1	1	0.232955	0.25	0.36875	0.193182	0.238636	0.26875
149000	1	1	1	0.232955	0.25	0.36875	0.193182	0.238636	0.26875
150000	1	1	1	0.232955	0.25	0.3875	0.193182	0.238636	0.26875
151000	1	1	1	0.232955	0.25	0.36875	0.193182	0.238636	0.26875
152000	1	1	1	0.232955	0.25	0.36875	0.176136	0.238636	0.26875
153000	1	1	1	0.232955	0.25	0.3875	0.176136	0.238636	0.26875
154000	1	1	1	0.232955	0.25	0.3875	0.176136	0.238636	0.26875
155000	1	1	1	0.232955	0.25	0.325	0.198864	0.25	0.25
156000	1	1	1	0.232955	0.25	0.325	0.198864	0.25	0.25
157000	1	1	1	0.232955	0.25	0.30625	0.181818	0.25	0.25
158000	1	1	1	0.232955	0.25	0.33125	0.198864	0.25	0.25
159000	1	1	1	0.232955	0.25	0.35	0.198864	0.25	0.25
160000	1	1	1	0.232955	0.25	0.33125	0.198864	0.25	0.25
161000	1	1	1	0.25	0.25	0.35	0.198864	0.25	0.25
162000	1	1	1	0.25	0.25	0.35	0.198864	0.25	0.25
163000	1	1	1	0.25	0.25	0.33125	0.215909	0.25	0.25
164000	1	1	1	0.25	0.25	0.36875	0.215909	0.25	0.25
165000	1	1	1	0.25	0.25	0.3875	0.232955	0.25	0.25
166000	1	1	1	0.25	0.25	0.4125	0.232955	0.25	0.25
167000	1	1	1	0.25	0.25	0.43125	0.232955	0.25	0.25
168000	1	1	1	0.25	0.25	0.45	0.25	0.25	0.25
169000	1	1	1	0.25	0.25	0.43125	0.25	0.25	0.25
170000	1	1	1	0.25	0.25	0.43125	0.25	0.25	0.25
171000	1	1	1	0.25	0.25	0.45	0.25	0.25	0.25
172000	1	1	1	0.227273	0.25	0.45	0.25	0.25	0.25
173000	1	1	1	0.210227	0.25	0.43125	0.25	0.25	0.25
174000	1	1	1	0.193182	0.25	0.39375	0.25	0.25	0.25
175000	1	1	1	0.193182	0.25	0.39375	0.25	0.25	0.25
176000	1	1	1	0.193182	0.25	0.36875	0.25	0.25	0.25
177000	1	1	1	0.193182	0.25	0.35	0.25	0.25	0.25
178000	1	1	1	0.193182	0.25	0.35	0.25	0.25	0.25
179000	1	1	1	0.193182	0.25	0.375	0.25	0.25	0.25
180000	1	1	1	0.193182	0.2625	0.4	0.25	0.25	0.25
181000	1	1	1	0.193182	0.275	0.40625	0.25	0.25	0.25
182000	1	1	1	0.170455	0.275	0.425	0.25	0.25	0.25
183000	1	1	1	0.193182	0.275	0.44375	0.25	0.25	0.25
184000	1	1	1	0.210227	0.275	0.44375	0.25	0.25	0.25
185000	1	1	1	0.227273	0.275	0.425	0.25	0.25	0.25
186000	1	1	1	0.210227	0.275	0.44375	0.25	0.25	0.25
187000	1	1	1	0.210227	0.275	0.4625	0.25	0.25	0.25
188000	1	1	1	0.1875	0.275	0.4625	0.25	0.25	0.25
189000	1	1	1	0.1875	0.275	0.4625	0.25	0.25	0.25
190000	1	1	1	0.1875	0.2625	0.45625	0.25	0.25	0.25
191000	1	1	1	0.1875	0.25	0.45	0.25	0.25	0.25
192000	1	1	1	0.164773	0.25	0.45	0.25	0.25	0.25
193000	1	1	1	0.1875	0.25	0.43125	0.25	0.25	0.25
194000	1	1	1	0.170455	0.25	0.45625	0.25	0.25	0.25
195000	1	1	1	0.153409	0.25	0.45625	0.25	0.25	0.25
196000	1	1	1	0.153409	0.25	0.4375	0.25	0.25	0.25
197000	1	1	1	0.170455	0.25	0.41875	0.25	0.25	0.25
198000	1	1	1	0.170455	0.25	0.375	0.25	0.25	0.25
199000	1	1	1	0.193182	0.25	0.35	0.25	0.25	0.25
200000	1	1	1	0.193182	0.25	0.33125	0.25	0.25	0.25
201000	1	1	1	0.1875	0.25	0.298611	0.25	0.25	0.25
202000	1	1	1	0.180556	0.25	0.28125	0.25	0.25	0.25
203000	1	1	1	0.203125	0.25	0.285714	0.25	0.25	0.25
204000	1	1	1	0.196429	0.25	0.25	0.25	0.25	0.25
205000	1	1	1	0.21875	0.25	0.25	0.25	0.25	0.25
206000	1	1	1	0.25	0.25	0.25	0.25	0.25	0.25
207000	1	1	1	0.25	0.25	0.25	0.25	0.25	0.25
208000	1	1	1	0.25	0.25	0.25	0.25	0.25	0.25
209000	1	1	1	0.25	0.25	0.25	0.25	0.25	0.25
