# Supplementary material
Source: ML conference proceedings conference paper supplement (https://openreview.net/forum?id=Lb8ZnWW_In6)
Supplement: supplementary_material [file office_t1.xlsx]

## Sheet: aqrm
0	0	0	0	0	0	0	0	0	0
0	0	0	0	0	0	1	0	0	0
0	0	0	0	0	0	0	0	0	0
0	0	0	0	0	0	0	0	0	0
0	0	0	0	0	0	0	0	0	0
0	0	0	0	1	0	0	0	0	0
0	0	0	0	0	0	0	0	0	0
0	0	0	0	0	0	0	0	0	0
0	0	0	0	0	0	0	0	0	0
0	1	0	0	0	0	1	0	1	0
0	0	0	0	0	1	0	0	0	0
0	1	0	1	0	0	1	0	0	0
1	1	1	1	1	1	0	1	0	1
0	1	1	1	0	1	1	1	1	1
1	1	1	1	1	1	1	1	1	1
1	1	1	1	1	1	1	1	1	1
1	1	1	1	1	1	1	1	1	1
1	1	1	1	1	1	1	1	1	1
1	1	1	1	1	1	1	1	1	1
1	1	1	1	1	1	1	1	1	1
1	1	1	1	1	1	1	1	1	1
1	1	1	1	1	1	1	1	1	1
1	1	1	1	1	1	1	1	1	1
1	1	1	1	1	1	1	1	1	1
1	1	1	1	1	1	1	1	1	1
1	1	1	1	1	1	1	1	1	1
1	1	1	1	1	1	1	1	1	1
1	1	1	1	1	1	1	1	1	1
1	1	1	1	1	1	1	1	1	1
1	1	1	1	1	1	1	1	1	1
1	1	1	1	1	1	1	1	1	1
1	1	1	1	1	1	1	1	1	1
1	1	1	1	1	1	1	1	1	1
1	1	1	1	1	1	1	1	1	1
1	1	1	1	1	1	1	1	1	1
1	1	1	1	1	1	1	1	1	1
1	1	1	1	1	1	1	1	1	1
1	1	1	1	1	1	1	1	1	1
1	1	1	1	1	1	1	1	1	1
1	1	1	1	1	1	1	1	1	1
1	1	1	1	1	1	1	1	1	1
1	1	1	1	1	1	1	1	1	1
1	1	1	1	1	1	1	1	1	1
1	1	1	1	1	1	1	1	1	1
1	1	1	1	1	1	1	1	1	1
1	1	1	1	1	1	1	1	1	1
1	1	1	1	1	1	1	1	1	1
1	1	1	1	1	1	1	1	1	1
1	1	1	1	1	1	1	1	1	1
1	1	1	1	1	1	1	1	1	1
1	1	1	1	1	1	1	1	1	1
1	1	1	1	1	1	1	1	1	1
1	1	1	1	1	1	1	1	1	1
1	1	1	1	1	1	1	1	1	1
1	1	1	1	1	1	1	1	1	1
1	1	1	1	1	1	1	1	1	1
1	1	1	1	1	1	1	1	1	1
1	1	1	1	1	1	1	1	1	1
1	1	1	1	1	1	1	1	1	1
1	1	1	1	1	1	1	1	1	1
1	1	1	1	1	1	1	1	1	1
1	1	1	1	1	1	1	1	1	1
1	1	1	1	1	1	1	1	1	1
1	1	1	1	1	1	1	1	1	1
1	1	1	1	1	1	1	1	1	1
1	1	1	1	1	1	1	1	1	1
1	1	1	1	1	1	1	1	1	1
1	1	1	1	1	1	1	1	1	1
1	1	1	1	1	1	1	1	1	1
1	1	1	1	1	1	1	1	1	1
1	1	1	1	1	1	1	1	1	1
1	1	1	1	1	1	1	1	1	1
1	1	1	1	1	1	1	1	1	1
1	1	1	1	1	1	1	1	1	1
1	1	1	1	1	1	1	1	1	1
1	1	1	1	1	1	1	1	1	1
1	1	1	1	1	1	1	1	1	1
1	1	1	1	1	1	1	1	1	1
1	1	1	1	1	1	1	1	1	1
1	1	1	1	1	1	1	1	1	1
1	1	1	1	1	1	1	1	1	1
1	1	1	1	1	1	1	1	1	1
1	1	1	1	1	1	1	1	1	1
1	1	1	1	1	1	1	1	1	1
1	1	1	1	1	1	1	1	1	1
1	1	1	1	1	1	1	1	1	1
1	1	1	1	1	1	1	1	1	1
1	1	1	1	1	1	1	1	1	1
1	1	1	1	1	1	1	1	1	1
1	1	1	1	1	1	1	1	1	1
1	1	1	1	1	1	1	1	1	1
1	1	1	1	1	1	1	1	1	1
1	1	1	1	1	1	1	1	1	1
1	1	1	1	1	1	1	1	1	1
1	1	1	1	1	1	1	1	1	1
1	1	1	1	1	1	1	1	1	1
1	1	1	1	1	1	1	1	1	1
1	1	1	1	1	1	1	1	1	1
1	1	1	1	1	1	1	1	1	1
1	1	1	1	1	1	1	1	1	1
1	1	1	1	1	1	1	1	1	1
1	1	1	1	1	1	1	1	1	1
1	1	1	1	1	1	1	1	1	1
1	1	1	1	1	1	1	1	1	1
1	1	1	1	1	1	1	1	1	1
1	1	1	1	1	1	1	1	1	1
1	1	1	1	1	1	1	1	1	1
1	1	1	1	1	1	1	1	1	1
1	1	1	1	1	1	1	1	1	1
1	1	1	1	1	1	1	1	1	1
1	1	1	1	1	1	1	1	1	1
1	1	1	1	1	1	1	1	1	1
1	1	1	1	1	1	1	1	1	1
1	1	1	1	1	1	1	1	1	1
1	1	1	1	1	1	1	1	1	1
1	1	1	1	1	1	1	1	1	1
1	1	1	1	1	1	1	1	1	1
1	1	1	1	1	1	1	1	1	1
1	1	1	1	1	1	1	1	1	1
1	1	1	1	1	1	1	1	1	1
1	1	1	1	1	1	1	1	1	1
1	1	1	1	1	1	1	1	1	1
1	1	1	1	1	1	1	1	1	1
1	1	1	1	1	1	1	1	1	1
1	1	1	1	1	1	1	1	1	1
1	1	1	1	1	1	1	1	1	1
1	1	1	1	1	1	1	1	1	1
1	1	1	1	1	1	1	1	1	1
1	1	1	1	1	1	1	1	1	1
1	1	1	1	1	1	1	1	1	1
1	1	1	1	1	1	1	1	1	1
1	1	1	1	1	1	1	1	1	1
1	1	1	1	1	1	1	1	1	1
1	1	1	1	1	1	1	1	1	1
1	1	1	1	1	1	1	1	1	1
1	1	1	1	1	1	1	1	1	1
1	1	1	1	1	1	1	1	1	1
1	1	1	1	1	1	1	1	1	1
1	1	1	1	1	1	1	1	1	1
1	1	1	1	1	1	1	1	1	1
1	1	1	1	1	1	1	1	1	1
1	1	1	1	1	1	1	1	1	1
1	1	1	1	1	1	1	1	1	1
1	1	1	1	1	1	1	1	1	1
1	1	1	1	1	1	1	1	1	1
1	1	1	1	1	1	1	1	1	1
1	1	1	1	1	1	1	1	1	1
1	1	1	1	1	1	1	1	1	1
1	1	1	1	1	1	1	1	1	1
1	1	1	1	1	1	1	1	1	1
1	1	1	1	1	1	1	1	1	1
1	1	1	1	1	1	1	1	1	1
1	1	1	1	1	1	1	1	1	1
1	1	1	1	1	1	1	1	1	1
1	1	1	1	1	1	1	1	1	1
1	1	1	1	1	1	1	1	1	1
1	1	1	1	1	1	1	1	1	1
1	1	1	1	1	1	1	1	1	1
1	1	1	1	1	1	1	1	1	1
1	1	1	1	1	1	1	1	1	1
1	1	1	1	1	1	1	1	1	1
1	1	1	1	1	1	1	1	1	1
1	1	1	1	1	1	1	1	1	1
1	1	1	1	1	1	1	1	1	1
1	1	1	1	1	1	1	1	1	1
1	1	1	1	1	1	1	1	1	1
1	1	1	1	1	1	1	1	1	1
1	1	1	1	1	1	1	1	1	1
1	1	1	1	1	1	1	1	1	1
1	1	1	1	1	1	1	1	1	1
1	1	1	1	1	1	1	1	1	1
1	1	1	1	1	1	1	1	1	1
1	1	1	1	1	1	1	1	1	1
1	1	1	1	1	1	1	1	1	1
1	1	1	1	1	1	1	1	1	1
1	1	1	1	1	1	1	1	1	1
1	1	1	1	1	1	1	1	1	1
1	1	1	1	1	1	1	1	1	1
1	1	1	1	1	1	1	1	1	1
1	1	1	1	1	1	1	1	1	1
1	1	1	1	1	1	1	1	1	1
1	1	1	1	1	1	1	1	1	1
1	1	1	1	1	1	1	1	1	1
1	1	1	1	1	1	1	1	1	1
1	1	1	1	1	1	1	1	1	1
1	1	1	1	1	1	1	1	1	1
1	1	1	1	1	1	1	1	1	1
1	1	1	1	1	1	1	1	1	1
1	1	1	1	1	1	1	1	1	1
1	1	1	1	1	1	1	1	1	1
1	1	1	1	1	1	1	1	1	1
1	1	1	1	1	1	1	1	1	1
1	1	1	1	1	1	1	1	1	1
1	1	1	1	1	1	1	1	1	1
1	1	1	1	1	1	1	1	1	1
1	1	1	1	1	1	1	1	1	1
1	1	1	1	1	1	1	1	1	1
1	1	1	1	1	1	1	1	1	1
1	1	1	1	1	1	1	1	1	1
1	1	1	1	1	1	1	1	1	1
1	1	1	1	1	1	1	1	1	1
1	1	1	1	1	1	1	1	1	1
1	1	1	1	1	1	1	1	1	1
1	1	1	1	1	1	1	1	1	1
1	1	1	1	1	1	1	1	1	1
1	1	1	1	1	1	1	1	1	1
1	1	1	1	1	1	1	1	1	1
1	1	1	1	1	1	1	1	1	1
1	1	1	1	1	1	1	1	1	1
1	1	1	1	1	1	1	1	1	1
1	1	1	1	1	1	1	1	1	1
1	1	1	1	1	1	1	1	1	1
1	1	1	1	1	1	1	1	1	1
1	1	1	1	1	1	1	1	1	1
1	1	1	1	1	1	1	1	1	1
1	1	1	1	1	1	1	1	1	1
1	1	1	1	1	1	1	1	1	1
1	1	1	1	1	1	1	1	1	1
1	1	1	1	1	1	1	1	1	1
1	1	1	1	1	1	1	1	1	1
1	1	1	1	1	1	1	1	1	1
1	1	1	1	1	1	1	1	1	1
1	1	1	1	1	1	1	1	1	1
1	1	1	1	1	1	1	1	1	1
1	1	1	1	1	1	1	1	1	1
1	1	1	1	1	1	1	1	1	1
1	1	1	1	1	1	1	1	1	1
1	1	1	1	1	1	1	1	1	1
1	1	1	1	1	1	1	1	1	1
1	1	1	1	1	1	1	1	1	1
1	1	1	1	1	1	1	1	1	1
1	1	1	1	1	1	1	1	1	1
1	1	1	1	1	1	1	1	1	1
1	1	1	1	1	1	1	1	1	1
1	1	1	1	1	1	1	1	1	1
1	1	1	1	1	1	1	1	1	1
1	1	1	1	1	1	1	1	1	1
1	1	1	1	1	1	1	1	1	1
1	1	1	1	1	1	1	1	1	1
1	1	1	1	1	1	1	1	1	1
1	1	1	1	1	1	1	1	1	1
1	1	1	1	1	1	1	1	1	1
1	1	1	1	1	1	1	1	1	1
1	1	1	1	1	1	1	1	1	1
1	1	1	1	1	1	1	1	1	1
1	1	1	1	1	1	1	1	1	1
1	1	1	1	1	1	1	1	1	1
1	1	1	1	1	1	1	1	1	1
1	1	1	1	1	1	1	1	1	1
1	1	1	1	1	1	1	1	1	1
1	1	1	1	1	1	1	1	1	1
1	1	1	1	1	1	1	1	1	1
1	1	1	1	1	1	1	1	1	1
1	1	1	1	1	1	1	1	1	1
1	1	1	1	1	1	1	1	1	1
1	1	1	1	1	1	1	1	1	1
1	1	1	1	1	1	1	1	1	1
1	1	1	1	1	1	1	1	1	1
1	1	1	1	1	1	1	1	1	1
1	1	1	1	1	1	1	1	1	1
1	1	1	1	1	1	1	1	1	1
1	1	1	1	1	1	1	1	1	1
1	1	1	1	1	1	1	1	1	1
1	1	1	1	1	1	1	1	1	1
1	1	1	1	1	1	1	1	1	1
1	1	1	1	1	1	1	1	1	1
1	1	1	1	1	1	1	1	1	1
1	1	1	1	1	1	1	1	1	1
1	1	1	1	1	1	1	1	1	1
1	1	1	1	1	1	1	1	1	1
1	1	1	1	1	1	1	1	1	1
1	1	1	1	1	1	1	1	1	1
1	1	1	1	1	1	1	1	1	1
1	1	1	1	1	1	1	1	1	1
1	1	1	1	1	1	1	1	1	1
1	1	1	1	1	1	1	1	1	1
1	1	1	1	1	1	1	1	1	1
1	1	1	1	1	1	1	1	1	1
1	1	1	1	1	1	1	1	1	1
1	1	1	1	1	1	1	1	1	1
1	1	1	1	1	1	1	1	1	1
1	1	1	1	1	1	1	1	1	1
1	1	1	1	1	1	1	1	1	1
1	1	1	1	1	1	1	1	1	1
1	1	1	1	1	1	1	1	1	1
1	1	1	1	1	1	1	1	1	1
1	1	1	1	1	1	1	1	1	1
1	1	1	1	1	1	1	1	1	1
1	1	1	1	1	1	1	1	1	1
1	1	1	1	1	1	1	1	1	1
1	1	1	1	1	1	1	1	1	1
1	1	1	1	1	1	1	1	1	1
1	1	1	1	1	1	1	1	1	1
1	1	1	1	1	1	1	1	1	1
1	1	1	1	1	1	1	1	1	1
1	1	1	1	1	1	1	1	1	1
1	1	1	1	1	1	1	1	1	1
1	1	1	1	1	1	1	1	1	1
1	1	1	1	1	1	1	1	1	1
1	1	1	1	1	1	1	1	1	1

## Sheet: hrl
0	0	0	0	0	0	0	0	0	0
0	0	0	0	0	0	0	0	0	0
0	0	0	0	0	1	1	0	0	0
1	1	1	1	1	0	0	1	1	1
1	1	1	1	0	1	1	1	1	0
1	1	1	1	1	1	1	1	0	1
1	1	1	1	1	1	1	1	1	1
1	1	1	1	1	1	1	1	1	1
1	1	1	0	1	1	1	1	1	1
1	1	1	1	1	1	1	1	1	1
1	1	1	1	1	1	1	1	1	1
1	1	1	1	1	1	1	1	1	1
1	1	1	1	1	1	1	1	1	1
1	1	1	1	1	1	1	1	1	1
1	1	1	1	1	1	1	1	1	1
0	0	1	1	1	1	1	0	1	1
1	1	1	1	1	1	1	1	1	1
0	1	1	1	1	1	1	1	1	1
1	1	1	1	1	1	1	1	1	1
1	1	1	1	1	1	1	1	1	1
1	1	1	1	0	1	1	1	0	1
1	1	1	0	0	1	1	1	1	0
1	1	1	0	1	1	1	1	1	1
1	1	1	1	1	1	1	1	1	1
1	1	1	1	1	1	1	1	1	1
1	1	1	1	1	1	1	1	1	0
1	1	1	1	1	1	1	1	0	1
1	1	1	1	1	1	1	1	0	1
0	1	1	1	1	1	1	1	1	1
1	1	1	1	1	1	1	1	1	1
1	1	1	1	1	1	1	1	1	1
1	1	1	1	1	0	1	1	1	1
1	1	1	1	1	1	1	1	1	1
1	1	1	1	0	1	1	1	1	1
1	1	1	1	1	1	1	0	1	1
1	1	1	1	1	1	1	0	1	1
1	1	1	1	1	1	1	1	1	1
1	0	1	1	1	1	1	1	1	1
1	1	1	1	1	1	1	0	1	0
1	1	1	1	1	1	1	1	1	1
1	1	1	1	1	1	1	1	1	1
1	1	0	1	1	1	1	1	1	1
1	1	0	1	1	1	0	1	0	1
1	0	1	1	1	1	1	0	1	1
1	1	1	1	1	1	1	1	1	0
1	0	1	0	0	1	1	1	1	1
1	1	1	1	1	1	1	0	1	1
1	1	0	1	1	1	1	1	1	1
1	1	1	1	1	1	1	1	1	1
1	1	1	1	1	1	1	1	1	1
1	1	1	1	1	1	1	0	1	1
1	1	1	1	1	1	1	1	0	1
1	1	1	1	0	1	0	1	1	1
1	1	1	1	1	1	1	1	1	1
1	1	0	1	1	1	0	1	1	1
0	1	1	0	1	0	1	1	1	0
0	1	1	1	1	1	0	1	1	1
1	1	1	1	1	1	1	1	1	1
1	1	0	1	1	1	1	1	1	1
1	1	1	1	1	1	0	1	1	1
1	1	1	1	1	0	1	1	1	1
1	1	1	1	1	1	1	1	1	1
1	0	1	1	1	1	1	1	1	1
1	1	0	1	1	1	1	1	1	1
1	1	1	1	1	1	1	1	1	1
0	1	1	1	1	1	1	1	1	1
1	1	1	1	1	1	1	1	1	1
1	1	0	1	1	1	1	1	1	1
1	1	1	1	1	1	1	1	1	1
1	1	1	1	1	1	1	1	1	1
1	1	1	0	1	1	0	1	1	1
1	0	1	1	1	1	1	1	1	1
1	1	1	1	1	1	1	1	1	1
0	1	1	1	0	1	1	1	1	1
1	1	1	1	1	1	1	0	1	1
1	1	1	1	1	0	1	1	1	1
1	0	1	1	0	1	1	1	1	1
1	1	1	1	0	1	1	1	1	1
0	0	1	1	1	0	1	1	1	1
1	1	1	0	1	1	1	1	1	1
1	1	1	1	1	0	1	1	1	1
1	1	1	1	1	1	1	1	1	1
1	1	1	1	1	1	1	1	1	1
1	1	1	1	1	1	1	0	0	1
1	1	1	1	1	1	1	1	1	1
0	1	1	1	0	1	1	1	1	1
1	1	1	0	1	0	1	1	1	1
0	1	1	0	1	1	1	1	1	1
1	1	1	1	1	1	1	0	1	1
1	1	1	1	1	1	1	1	1	1
0	1	1	1	1	1	1	1	0	1
1	0	1	1	1	1	1	1	0	1
1	1	1	1	1	1	0	1	1	1
1	1	1	1	1	1	1	1	1	1
1	1	0	1	1	1	1	1	1	1
1	0	1	1	1	1	1	1	1	1
1	1	1	1	1	1	1	1	1	1
1	1	1	1	0	0	1	1	1	1
0	1	1	1	1	1	1	1	1	1
1	1	0	1	1	1	1	1	1	1
1	1	1	1	1	1	1	1	1	1
1	1	0	1	0	1	1	1	1	1
1	1	1	1	1	1	1	1	1	1
0	1	1	1	1	1	1	1	1	1
1	1	1	1	1	1	1	1	1	1
1	1	0	1	1	1	1	1	1	1
1	1	1	0	1	0	1	0	1	1
1	1	0	0	1	1	0	1	0	1
0	1	1	0	1	0	0	1	1	1
1	1	1	1	1	1	1	1	1	1
1	1	1	0	1	1	1	1	1	0
0	1	1	1	1	1	0	1	1	1
1	1	1	1	0	1	1	1	1	1
1	1	1	1	1	1	0	1	0	1
1	1	1	1	1	1	1	1	1	1
1	1	0	1	1	1	1	1	1	0
1	1	1	1	0	1	1	1	1	1
1	1	1	1	1	1	1	1	1	0
1	0	1	1	1	1	1	1	0	1
1	0	1	1	1	1	1	1	1	1
1	1	1	1	1	1	1	1	1	1
1	1	1	1	1	1	1	1	0	1
1	1	1	1	0	1	1	1	1	1
1	1	1	1	1	1	1	1	1	1
1	0	1	1	1	1	1	1	1	1
1	1	1	1	0	1	1	1	1	1
1	1	1	1	1	1	1	0	1	1
0	1	1	1	1	1	1	1	1	1
1	1	1	1	1	1	1	1	1	0
1	1	1	1	1	1	1	1	0	1
1	1	0	1	1	1	1	1	1	1
1	1	1	1	1	1	1	1	1	1
1	1	1	1	1	1	1	1	1	1
1	1	1	1	1	1	1	1	1	0
1	1	1	1	1	1	1	0	1	1
1	1	1	1	1	0	1	1	1	1
1	1	1	1	1	1	1	1	1	1
1	1	1	0	1	1	0	1	1	1
0	1	1	1	1	1	1	1	1	1
1	1	1	1	1	0	1	1	1	1
1	1	1	1	1	1	1	1	1	1
1	1	1	1	1	1	1	1	1	1
1	0	1	1	1	1	1	0	0	1
0	1	1	0	1	0	0	1	0	1
1	1	1	1	1	1	1	1	1	1
0	1	1	1	1	1	1	1	1	1
1	1	1	0	0	1	0	1	1	1
1	1	1	1	1	1	1	1	1	1
1	1	1	1	1	1	1	1	1	1
1	1	1	1	0	1	1	1	1	1
1	0	1	1	1	1	1	1	1	1
1	0	1	1	0	1	1	0	1	1
1	1	1	1	1	1	1	1	1	1
0	1	0	1	1	1	1	1	0	1
1	0	1	1	1	1	0	1	1	1
1	1	1	1	1	0	1	1	1	0
0	1	0	1	1	1	1	1	1	0
1	1	1	1	1	1	1	1	1	1
1	0	1	1	1	1	1	1	1	1
1	1	1	1	1	1	1	0	1	0
1	1	1	1	0	1	1	1	1	1
1	0	1	1	1	1	1	1	1	1
1	1	1	1	1	1	1	1	1	1
1	1	1	1	1	1	1	1	1	1
1	1	1	1	1	0	0	1	1	1
1	1	1	1	1	1	1	1	1	1
1	0	0	1	1	1	1	1	1	1
1	1	1	1	1	1	1	1	1	1
1	1	1	1	1	1	0	1	1	1
1	1	1	1	1	1	0	1	1	1
1	1	1	1	1	1	0	1	1	1
0	1	1	1	1	1	1	1	1	0
1	1	1	1	1	1	1	1	1	1
1	1	1	0	1	1	1	1	0	1
1	1	1	1	1	1	1	0	1	1
1	1	1	1	1	1	0	1	1	1
1	1	1	0	1	1	1	1	1	0
1	1	1	1	1	1	1	1	1	1
1	1	1	1	1	1	1	1	1	1
1	1	1	1	1	1	1	1	1	1
1	1	1	1	1	1	1	1	1	1
1	1	1	1	1	1	0	0	1	1
0	1	1	1	1	1	1	1	1	1
1	1	1	1	1	1	1	1	1	1
1	1	1	1	1	1	1	1	1	1
1	1	1	1	1	1	1	0	1	1
1	1	1	1	1	1	1	1	1	1
1	1	0	1	1	1	1	1	1	1
1	1	1	0	1	1	1	1	1	1
1	1	1	1	0	1	1	1	1	1
1	1	1	1	1	1	1	0	1	1
1	1	1	1	1	1	1	1	1	1
1	1	1	1	1	1	1	1	1	1
1	1	1	1	1	1	1	1	1	1
1	1	0	1	1	1	1	1	1	0
1	1	1	1	1	1	1	1	1	1
1	1	1	1	1	1	0	1	1	1
1	1	1	1	1	1	1	1	1	0
1	1	1	0	1	1	1	0	1	1
1	1	1	0	1	1	1	1	1	1

## Sheet: qlearn
0	1	1	0	0	0	0	0	0	1
0	1	1	1	0	0	1	1	0	1
1	0	0	1	0	0	0	1	0	0
0	1	0	0	1	1	1	1	1	1
1	1	0	1	1	0	0	0	0	0
0	0	1	0	0	1	0	1	1	0
1	1	0	0	1	1	1	0	1	1
0	0	1	1	0	0	0	1	1	0
1	1	1	0	0	0	1	1	1	1
1	0	1	0	1	0	1	0	1	0
1	0	1	0	1	1	1	0	0	0
0	0	0	0	1	1	1	1	0	1
1	1	0	1	1	1	1	1	1	1
1	1	0	0	0	1	1	1	1	1
0	1	0	1	0	0	1	0	1	0
0	0	1	0	0	0	1	0	0	0
0	0	0	0	1	1	0	0	1	0
1	1	1	1	1	0	1	1	1	1
0	1	1	1	1	0	0	1	0	0
1	1	0	1	0	0	1	0	1	1
0	0	0	1	1	1	1	1	1	1
1	0	1	1	0	0	1	1	1	1
0	1	1	0	1	1	1	1	1	1
1	0	1	0	1	0	1	1	0	0
0	0	0	1	1	0	0	1	1	0
1	1	1	0	1	1	1	1	1	1
1	0	1	1	1	0	1	1	1	1
1	0	0	1	1	0	0	1	0	1
0	0	1	1	0	0	0	0	0	1
1	0	1	0	1	1	1	1	1	1
1	1	1	1	1	1	1	1	1	1
0	1	0	0	1	1	1	1	1	0
1	0	1	0	0	1	1	1	1	1
0	0	0	1	1	1	1	1	1	1
1	0	0	1	1	1	0	1	1	0
0	1	1	0	1	1	1	1	1	1
1	1	1	1	0	1	1	1	0	1
1	1	1	1	0	1	1	0	1	1
0	1	0	1	0	0	1	1	1	1
1	1	1	1	0	1	1	0	1	1
0	0	1	1	1	0	1	1	1	0
1	0	1	0	1	0	1	0	1	1
0	0	1	0	0	1	1	1	1	1
1	0	1	1	0	1	1	1	1	1
1	1	1	1	1	1	1	1	1	1
0	0	1	0	0	1	1	1	1	1
0	0	1	1	1	1	1	1	1	1
1	1	1	0	1	0	1	1	1	1
0	0	1	0	0	0	1	0	0	0
1	0	1	1	0	1	1	1	1	1
1	1	0	1	1	1	1	1	1	1
1	0	0	1	1	1	1	0	1	1
1	0	1	0	1	0	1	1	1	1
1	1	1	1	1	1	1	1	0	1
1	1	0	0	1	1	0	1	1	1
1	0	1	1	0	1	1	1	1	1
1	1	0	1	1	1	1	1	1	1
1	1	1	0	0	1	1	1	1	0
1	1	1	1	1	1	1	1	1	1
1	1	1	1	1	1	1	1	1	1
0	1	1	1	1	1	1	1	1	1
1	1	1	1	1	1	1	1	1	1
1	0	1	1	1	0	1	1	1	1
0	1	1	1	0	1	1	1	1	1
0	1	1	1	1	1	1	1	1	1
1	1	1	1	1	1	1	0	1	1
1	1	0	1	1	1	1	1	0	1
1	1	1	1	1	0	1	1	1	1
1	1	1	0	1	1	1	1	1	1
1	0	0	1	0	1	1	1	1	1
1	1	1	1	1	1	1	1	1	1
1	1	0	1	1	1	1	1	1	1
1	1	1	1	1	1	1	1	1	1
1	1	0	1	1	1	1	1	1	1
1	0	1	1	0	1	1	1	1	1
1	1	1	1	1	1	1	1	1	1
1	1	0	1	1	1	1	0	1	1
1	1	1	0	0	0	1	1	1	1
0	1	1	1	1	0	1	1	1	1
1	1	1	1	1	1	1	0	1	1
1	1	1	1	1	1	1	1	1	1
1	1	1	1	1	1	1	1	1	1
1	1	1	1	1	0	1	1	1	1
1	0	1	1	1	0	1	1	1	1
0	1	0	1	1	1	1	1	1	1
0	1	1	1	1	1	1	1	1	1
1	1	1	1	1	1	1	1	1	1
1	1	1	1	1	1	1	1	1	1
1	1	1	1	1	1	1	1	1	1
1	1	1	1	1	1	1	1	1	1
0	1	1	0	1	1	1	0	1	1
1	1	1	1	1	0	1	1	1	1
1	1	0	1	1	0	0	0	0	1
1	1	1	1	1	1	0	0	1	1
1	1	0	1	1	0	1	1	1	1
1	1	0	1	1	1	1	1	1	1
1	1	1	1	1	1	1	1	1	1
0	1	1	1	1	1	0	1	1	1
1	1	0	1	1	1	1	1	1	1
1	1	1	1	1	1	1	1	1	1
1	1	1	1	1	1	1	1	1	1
1	1	1	1	1	1	1	1	1	1
0	1	1	1	1	1	1	1	1	1
0	1	1	1	1	1	1	1	1	1
1	1	1	1	1	1	1	1	1	1
1	1	1	1	1	0	1	1	1	1
1	1	1	1	1	1	1	1	1	1
1	1	0	0	1	1	1	1	1	1
1	1	1	1	1	1	1	1	1	1
1	1	1	1	1	1	1	1	1	1
1	1	1	1	1	0	1	0	1	1
1	1	1	1	1	0	1	1	1	1
1	1	1	1	0	1	0	1	1	1
1	1	1	1	1	1	1	0	1	1
1	1	1	0	1	1	1	1	1	1
1	0	1	1	1	1	1	1	1	1
1	1	1	1	1	0	1	1	1	1
1	1	1	1	1	1	1	1	1	1
1	1	1	1	1	1	0	1	1	1
0	1	1	1	1	1	1	1	1	1
1	1	1	1	1	1	1	1	1	1
1	1	1	1	0	1	1	1	1	1
1	1	1	1	1	1	1	0	1	1
0	1	1	1	1	1	1	0	1	1
1	1	1	1	1	1	1	1	1	1
1	0	1	1	1	1	0	0	1	1
1	0	1	1	1	1	0	1	1	0
1	1	1	1	1	1	1	1	1	0
1	1	1	1	1	1	1	1	1	1
1	1	1	1	1	1	1	1	1	1
1	1	1	1	1	1	0	1	1	1
0	0	1	1	1	0	1	1	1	1
1	1	1	1	1	1	0	0	1	1
1	1	1	1	1	1	0	1	1	1
1	1	1	1	1	1	1	1	1	1
1	1	1	1	1	1	1	1	0	1
1	1	1	1	1	1	1	1	0	1
1	1	1	1	1	0	1	1	1	1
1	1	0	1	0	0	1	1	1	1
1	1	1	0	1	1	1	1	1	1
1	1	1	1	1	1	1	1	1	1
1	1	1	1	1	1	1	0	1	1
1	1	1	1	1	1	0	1	1	1
1	1	1	1	1	1	1	1	0	1
1	1	1	1	1	1	1	1	1	1
1	1	1	1	1	0	1	1	1	1
1	1	1	1	1	1	1	1	1	1
1	0	1	1	1	1	1	1	1	1
1	1	1	1	1	1	0	1	1	1
1	1	1	0	1	0	1	0	1	1
1	1	1	1	1	1	1	1	1	1
1	1	1	1	1	1	1	1	1	1
1	1	1	1	1	1	1	1	1	1
1	1	1	1	1	1	1	1	1	1
1	1	1	1	1	1	0	1	1	1
1	1	1	1	1	1	1	1	1	0
1	1	1	1	1	1	1	1	1	1
1	1	1	1	1	1	0	1	1	1
1	0	1	1	1	1	1	1	1	1
1	1	1	0	1	1	1	1	1	1
1	1	1	1	1	1	1	1	1	1
0	1	1	1	1	1	1	1	1	1
1	1	1	1	1	1	1	1	1	1
1	1	1	1	1	0	1	1	1	0
1	1	1	1	1	1	1	1	1	1
1	1	1	1	1	1	1	1	0	1
1	1	0	1	1	1	1	1	1	0
1	1	1	1	1	1	1	1	1	1
0	1	1	1	1	1	1	1	1	1
1	1	1	1	1	0	1	1	1	1
1	0	1	1	1	1	1	1	1	0
1	1	1	0	0	1	1	1	0	0
0	0	1	1	1	1	1	1	1	0
1	1	1	0	1	1	1	0	1	0
1	1	1	1	1	1	1	1	1	1
1	1	1	1	1	1	1	1	1	1
1	1	1	1	1	1	1	0	0	1
1	1	1	1	1	1	0	1	1	1
1	1	1	1	1	1	1	1	1	1
1	1	1	1	1	1	1	0	1	1
1	1	1	1	1	1	1	1	1	1
1	0	1	1	0	1	0	1	1	0
1	0	1	1	1	1	1	1	1	1
1	0	1	0	1	1	1	1	1	1
1	1	1	0	1	1	1	1	1	1
1	0	1	1	1	0	0	1	1	1
1	1	1	1	1	1	1	1	1	1
1	1	0	0	1	1	1	0	0	1
1	0	1	1	1	1	1	1	1	0
1	1	1	1	1	1	1	1	1	1
1	1	1	0	1	1	1	1	1	1
1	0	1	1	0	1	0	0	1	1
1	1	1	1	1	0	1	1	1	1
0	1	1	1	0	1	1	1	1	0
0	1	1	1	1	1	0	1	1	0
1	1	1	1	1	0	1	1	1	1
1	1	0	1	1	1	0	1	1	1
0	1	1	1	1	1	0	1	1	1
1	1	1	1	1	1	1	1	1	1
1	0	1	1	0	1	1	1	1	1

## Sheet: together
steps	25th	50th	75th	25th	50th	75th	25th	50th	75th
1000	0	0	0	0	0	0.75	0	0	0
2000	0	0	0	0	1	1	0	0	0
3000	0	0	0	0	0	0.75	0	0	0
4000	0	0	0	0.25	1	1	1	1	1
5000	0	0	0	0	0	1	1	1	1
6000	0	0	0	0	0	1	1	1	1
7000	0	0	0	0.25	1	1	1	1	1
8000	0	0	0	0	0	1	1	1	1
9000	0	0	0	0.25	1	1	1	1	1
10000	0	0	0.75	0	0.5	1	1	1	1
11000	0	0	0	0	0.5	1	1	1	1
12000	0	0	0.75	0	0.5	1	1	1	1
13000	1	1	1	1	1	1	1	1	1
14000	1	1	1	0.25	1	1	1	1	1
15000	1	1	1	0	0	1	1	1	1
16000	1	1	1	0	0	0	0.25	1	1
17000	1	1	1	0	0	0.75	1	1	1
18000	1	1	1	1	1	1	1	1	1
19000	1	1	1	0	0.5	1	1	1	1
20000	1	1	1	0	1	1	1	1	1
21000	1	1	1	0.25	1	1	1	1	1
22000	1	1	1	0.25	1	1	0.25	1	1
23000	1	1	1	1	1	1	1	1	1
24000	1	1	1	0	0.5	1	1	1	1
25000	1	1	1	0	0	1	1	1	1
26000	1	1	1	1	1	1	1	1	1
27000	1	1	1	1	1	1	1	1	1
28000	1	1	1	0	0.5	1	1	1	1
29000	1	1	1	0	0	0.75	1	1	1
30000	1	1	1	1	1	1	1	1	1
31000	1	1	1	1	1	1	1	1	1
32000	1	1	1	0	1	1	1	1	1
33000	1	1	1	0.25	1	1	1	1	1
34000	1	1	1	0.25	1	1	1	1	1
35000	1	1	1	0	1	1	1	1	1
36000	1	1	1	1	1	1	1	1	1
37000	1	1	1	1	1	1	1	1	1
38000	1	1	1	1	1	1	1	1	1
39000	1	1	1	0	1	1	1	1	1
40000	1	1	1	1	1	1	1	1	1
41000	1	1	1	0	1	1	1	1	1
42000	1	1	1	0	1	1	1	1	1
43000	1	1	1	0	1	1	0.25	1	1
44000	1	1	1	1	1	1	1	1	1
45000	1	1	1	1	1	1	1	1	1
46000	1	1	1	0	1	1	0.25	1	1
47000	1	1	1	1	1	1	1	1	1
48000	1	1	1	1	1	1	1	1	1
49000	1	1	1	0	0	0	1	1	1
50000	1	1	1	1	1	1	1	1	1
51000	1	1	1	1	1	1	1	1	1
52000	1	1	1	0.25	1	1	1	1	1
53000	1	1	1	0.25	1	1	1	1	1
54000	1	1	1	1	1	1	1	1	1
55000	1	1	1	0.25	1	1	1	1	1
56000	1	1	1	1	1	1	0	1	1
57000	1	1	1	1	1	1	1	1	1
58000	1	1	1	0.25	1	1	1	1	1
59000	1	1	1	1	1	1	1	1	1
60000	1	1	1	1	1	1	1	1	1
61000	1	1	1	1	1	1	1	1	1
62000	1	1	1	1	1	1	1	1	1
63000	1	1	1	1	1	1	1	1	1
64000	1	1	1	1	1	1	1	1	1
65000	1	1	1	1	1	1	1	1	1
66000	1	1	1	1	1	1	1	1	1
67000	1	1	1	1	1	1	1	1	1
68000	1	1	1	1	1	1	1	1	1
69000	1	1	1	1	1	1	1	1	1
70000	1	1	1	0.25	1	1	1	1	1
71000	1	1	1	1	1	1	1	1	1
72000	1	1	1	1	1	1	1	1	1
73000	1	1	1	1	1	1	1	1	1
74000	1	1	1	1	1	1	1	1	1
75000	1	1	1	1	1	1	1	1	1
76000	1	1	1	1	1	1	1	1	1
77000	1	1	1	1	1	1	1	1	1
78000	1	1	1	0.25	1	1	1	1	1
79000	1	1	1	1	1	1	0.25	1	1
80000	1	1	1	1	1	1	1	1	1
81000	1	1	1	1	1	1	1	1	1
82000	1	1	1	1	1	1	1	1	1
83000	1	1	1	1	1	1	1	1	1
84000	1	1	1	1	1	1	1	1	1
85000	1	1	1	1	1	1	1	1	1
86000	1	1	1	1	1	1	1	1	1
87000	1	1	1	1	1	1	1	1	1
88000	1	1	1	1	1	1	1	1	1
89000	1	1	1	1	1	1	1	1	1
90000	1	1	1	1	1	1	1	1	1
91000	1	1	1	0.25	1	1	1	1	1
92000	1	1	1	1	1	1	1	1	1
93000	1	1	1	0	0.5	1	1	1	1
94000	1	1	1	1	1	1	1	1	1
95000	1	1	1	1	1	1	1	1	1
96000	1	1	1	1	1	1	1	1	1
97000	1	1	1	1	1	1	1	1	1
98000	1	1	1	1	1	1	1	1	1
99000	1	1	1	1	1	1	1	1	1
100000	1	1	1	1	1	1	1	1	1
101000	1	1	1	1	1	1	1	1	1
102000	1	1	1	1	1	1	1	1	1
103000	1	1	1	1	1	1	1	1	1
104000	1	1	1	1	1	1	1	1	1
105000	1	1	1	1	1	1	1	1	1
106000	1	1	1	1	1	1	1	1	1
107000	1	1	1	1	1	1	0.25	1	1
108000	1	1	1	1	1	1	0	1	1
109000	1	1	1	1	1	1	0	1	1
110000	1	1	1	1	1	1	1	1	1
111000	1	1	1	1	1	1	1	1	1
112000	1	1	1	1	1	1	1	1	1
113000	1	1	1	1	1	1	1	1	1
114000	1	1	1	1	1	1	1	1	1
115000	1	1	1	1	1	1	1	1	1
116000	1	1	1	1	1	1	1	1	1
117000	1	1	1	1	1	1	1	1	1
118000	1	1	1	1	1	1	1	1	1
119000	1	1	1	1	1	1	1	1	1
120000	1	1	1	1	1	1	1	1	1
121000	1	1	1	1	1	1	1	1	1
122000	1	1	1	1	1	1	1	1	1
123000	1	1	1	1	1	1	1	1	1
124000	1	1	1	1	1	1	1	1	1
125000	1	1	1	1	1	1	1	1	1
126000	1	1	1	0.25	1	1	1	1	1
127000	1	1	1	0.25	1	1	1	1	1
128000	1	1	1	1	1	1	1	1	1
129000	1	1	1	1	1	1	1	1	1
130000	1	1	1	1	1	1	1	1	1
131000	1	1	1	1	1	1	1	1	1
132000	1	1	1	0.25	1	1	1	1	1
133000	1	1	1	1	1	1	1	1	1
134000	1	1	1	1	1	1	1	1	1
135000	1	1	1	1	1	1	1	1	1
136000	1	1	1	1	1	1	1	1	1
137000	1	1	1	1	1	1	1	1	1
138000	1	1	1	1	1	1	1	1	1
139000	1	1	1	0.25	1	1	1	1	1
140000	1	1	1	1	1	1	1	1	1
141000	1	1	1	1	1	1	1	1	1
142000	1	1	1	1	1	1	1	1	1
143000	1	1	1	1	1	1	0.25	1	1
144000	1	1	1	1	1	1	0	0.5	1
145000	1	1	1	1	1	1	1	1	1
146000	1	1	1	1	1	1	1	1	1
147000	1	1	1	1	1	1	0.25	1	1
148000	1	1	1	1	1	1	1	1	1
149000	1	1	1	1	1	1	1	1	1
150000	1	1	1	0.25	1	1	1	1	1
151000	1	1	1	1	1	1	1	1	1
152000	1	1	1	1	1	1	0.25	1	1
153000	1	1	1	1	1	1	1	1	1
154000	1	1	1	1	1	1	0.25	1	1
155000	1	1	1	1	1	1	1	1	1
156000	1	1	1	1	1	1	1	1	1
157000	1	1	1	1	1	1	0.25	1	1
158000	1	1	1	1	1	1	1	1	1
159000	1	1	1	1	1	1	1	1	1
160000	1	1	1	1	1	1	1	1	1
161000	1	1	1	1	1	1	1	1	1
162000	1	1	1	1	1	1	1	1	1
163000	1	1	1	1	1	1	1	1	1
164000	1	1	1	1	1	1	1	1	1
165000	1	1	1	1	1	1	1	1	1
166000	1	1	1	1	1	1	1	1	1
167000	1	1	1	1	1	1	1	1	1
168000	1	1	1	1	1	1	1	1	1
169000	1	1	1	1	1	1	1	1	1
170000	1	1	1	1	1	1	1	1	1
171000	1	1	1	1	1	1	1	1	1
172000	1	1	1	0	1	1	1	1	1
173000	1	1	1	0.25	1	1	1	1	1
174000	1	1	1	0.25	1	1	1	1	1
175000	1	1	1	1	1	1	1	1	1
176000	1	1	1	1	1	1	1	1	1
177000	1	1	1	1	1	1	1	1	1
178000	1	1	1	1	1	1	1	1	1
179000	1	1	1	1	1	1	1	1	1
180000	1	1	1	1	1	1	1	1	1
181000	1	1	1	1	1	1	1	1	1
182000	1	1	1	0	1	1	1	1	1
183000	1	1	1	1	1	1	1	1	1
184000	1	1	1	1	1	1	1	1	1
185000	1	1	1	1	1	1	1	1	1
186000	1	1	1	0.25	1	1	1	1	1
187000	1	1	1	1	1	1	1	1	1
188000	1	1	1	0	1	1	1	1	1
189000	1	1	1	1	1	1	1	1	1
190000	1	1	1	1	1	1	1	1	1
191000	1	1	1	1	1	1	1	1	1
192000	1	1	1	0	1	1	1	1	1
193000	1	1	1	1	1	1	1	1	1
194000	1	1	1	0.25	1	1	1	1	1
195000	1	1	1	0.25	1	1	1	1	1
196000	1	1	1	1	1	1	1	1	1
197000	1	1	1	1	1	1	1	1	1
198000	1	1	1	1	1	1	1	1	1
199000	1	1	1	1	1	1	1	1	1
200000	1	1	1	1	1	1	1	1	1

## Sheet: final percentiles
0	0	0	0	0	0	0	0	0	0
1000	0	0	0	0	0	0.75	0	0	0
2000	0	0	0	0	0.5	0.875	0	0	0
3000	0	0	0	0	0.333333	0.833333	0	0	0
4000	0	0	0	0.0625	0.5	0.875	0.25	0.25	0.25
5000	0	0	0	0.05	0.4	0.9	0.4	0.4	0.4
6000	0	0	0	0.0416667	0.333333	0.916667	0.5	0.5	0.5
7000	0	0	0	0.0714286	0.428571	0.928571	0.571429	0.571429	0.571429
8000	0	0	0	0.0625	0.375	0.9375	0.625	0.625	0.625
9000	0	0	0	0.0833333	0.444444	0.944444	0.666667	0.666667	0.666667
10000	0	0	0.075	0.075	0.45	0.95	0.7	0.7	0.7
11000	0	0	0.0681818	0.0681818	0.454545	0.954545	0.727273	0.727273	0.727273
12000	0	0	0.136364	0.0681818	0.5	0.977273	0.818182	0.818182	0.818182
13000	0.0909091	0.0909091	0.227273	0.159091	0.5	0.977273	0.909091	0.909091	0.909091
14000	0.181818	0.181818	0.318182	0.181818	0.590909	1	1	1	1
15000	0.272727	0.272727	0.409091	0.159091	0.5	1	1	1	1
16000	0.363636	0.363636	0.5	0.159091	0.5	0.909091	0.931818	1	1
17000	0.454545	0.454545	0.590909	0.159091	0.5	0.886364	0.931818	1	1
18000	0.545455	0.545455	0.681818	0.227273	0.5	0.886364	0.931818	1	1
19000	0.636364	0.636364	0.772727	0.227273	0.545455	0.886364	0.931818	1	1
20000	0.727273	0.727273	0.863636	0.204545	0.545455	0.886364	0.931818	1	1		s
21000	0.818182	0.818182	0.886364	0.227273	0.590909	0.886364	0.931818	1	1
22000	0.909091	0.909091	0.977273	0.25	0.636364	0.886364	0.863636	1	1
23000	1	1	1	0.340909	0.681818	0.886364	0.863636	1	1
24000	1	1	1	0.25	0.636364	0.886364	0.863636	1	1
25000	1	1	1	0.227273	0.545455	0.886364	0.863636	1	1
26000	1	1	1	0.318182	0.636364	0.886364	0.863636	1	1
27000	1	1	1	0.409091	0.727273	0.977273	0.931818	1	1
28000	1	1	1	0.409091	0.772727	1	0.931818	1	1
29000	1	1	1	0.318182	0.681818	0.977273	0.931818	1	1
30000	1	1	1	0.409091	0.727273	0.977273	0.931818	1	1
31000	1	1	1	0.5	0.727273	0.977273	0.931818	1	1
32000	1	1	1	0.477273	0.727273	0.977273	0.931818	1	1
33000	1	1	1	0.477273	0.727273	0.977273	1	1	1
34000	1	1	1	0.409091	0.727273	0.977273	1	1	1
35000	1	1	1	0.409091	0.772727	0.977273	1	1	1
36000	1	1	1	0.5	0.863636	0.977273	1	1	1
37000	1	1	1	0.5	0.863636	0.977273	1	1	1
38000	1	1	1	0.5	0.863636	0.977273	1	1	1
39000	1	1	1	0.5	0.909091	0.977273	1	1	1
40000	1	1	1	0.590909	1	1	1	1	1
41000	1	1	1	0.5	1	1	1	1	1
42000	1	1	1	0.409091	1	1	1	1	1
43000	1	1	1	0.409091	1	1	0.931818	1	1
44000	1	1	1	0.477273	1	1	0.931818	1	1
45000	1	1	1	0.545455	1	1	0.931818	1	1
46000	1	1	1	0.545455	1	1	0.863636	1	1
47000	1	1	1	0.545455	1	1	0.863636	1	1
48000	1	1	1	0.545455	1	1	0.863636	1	1
49000	1	1	1	0.454545	0.909091	0.909091	0.863636	1	1
50000	1	1	1	0.545455	0.909091	0.909091	0.863636	1	1
51000	1	1	1	0.545455	0.909091	0.909091	0.863636	1	1
52000	1	1	1	0.568182	0.909091	0.909091	0.863636	1	1
53000	1	1	1	0.590909	0.909091	0.909091	0.863636	1	1
54000	1	1	1	0.681818	0.909091	0.909091	0.931818	1	1
55000	1	1	1	0.613636	0.909091	0.909091	0.931818	1	1
56000	1	1	1	0.613636	0.909091	0.909091	0.840909	1	1
57000	1	1	1	0.704545	0.909091	0.909091	0.909091	1	1
58000	1	1	1	0.636364	0.909091	0.909091	0.909091	1	1
59000	1	1	1	0.636364	0.909091	0.909091	0.909091	1	1
60000	1	1	1	0.727273	1	1	0.909091	1	1
61000	1	1	1	0.727273	1	1	0.909091	1	1
62000	1	1	1	0.727273	1	1	0.909091	1	1
63000	1	1	1	0.795455	1	1	0.909091	1	1
64000	1	1	1	0.863636	1	1	0.909091	1	1
65000	1	1	1	0.863636	1	1	0.909091	1	1
66000	1	1	1	0.931818	1	1	0.909091	1	1
67000	1	1	1	0.931818	1	1	1	1	1
68000	1	1	1	0.931818	1	1	1	1	1
69000	1	1	1	1	1	1	1	1	1
70000	1	1	1	0.931818	1	1	1	1	1
71000	1	1	1	0.931818	1	1	1	1	1
72000	1	1	1	0.931818	1	1	1	1	1
73000	1	1	1	0.931818	1	1	1	1	1
74000	1	1	1	0.931818	1	1	1	1	1
75000	1	1	1	0.931818	1	1	1	1	1
76000	1	1	1	0.931818	1	1	1	1	1
77000	1	1	1	0.931818	1	1	1	1	1
78000	1	1	1	0.863636	1	1	1	1	1
79000	1	1	1	0.863636	1	1	0.931818	1	1
80000	1	1	1	0.863636	1	1	0.931818	1	1
81000	1	1	1	0.931818	1	1	0.931818	1	1
82000	1	1	1	0.931818	1	1	0.931818	1	1
83000	1	1	1	0.931818	1	1	0.931818	1	1
84000	1	1	1	0.931818	1	1	0.931818	1	1
85000	1	1	1	0.931818	1	1	0.931818	1	1
86000	1	1	1	0.931818	1	1	0.931818	1	1
87000	1	1	1	0.931818	1	1	0.931818	1	1
88000	1	1	1	0.931818	1	1	0.931818	1	1
89000	1	1	1	1	1	1	0.931818	1	1
90000	1	1	1	1	1	1	1	1	1
91000	1	1	1	0.931818	1	1	1	1	1
92000	1	1	1	0.931818	1	1	1	1	1
93000	1	1	1	0.840909	0.954545	1	1	1	1
94000	1	1	1	0.840909	0.954545	1	1	1	1
95000	1	1	1	0.840909	0.954545	1	1	1	1
96000	1	1	1	0.840909	0.954545	1	1	1	1
97000	1	1	1	0.840909	0.954545	1	1	1	1
98000	1	1	1	0.840909	0.954545	1	1	1	1
99000	1	1	1	0.840909	0.954545	1	1	1	1
100000	1	1	1	0.840909	0.954545	1	1	1	1
101000	1	1	1	0.840909	0.954545	1	1	1	1
102000	1	1	1	0.909091	0.954545	1	1	1	1
103000	1	1	1	0.909091	0.954545	1	1	1	1
104000	1	1	1	1	1	1	1	1	1
105000	1	1	1	1	1	1	1	1	1
106000	1	1	1	1	1	1	1	1	1
107000	1	1	1	1	1	1	0.931818	1	1
108000	1	1	1	1	1	1	0.840909	1	1
109000	1	1	1	1	1	1	0.75	1	1
110000	1	1	1	1	1	1	0.75	1	1
111000	1	1	1	1	1	1	0.75	1	1
112000	1	1	1	1	1	1	0.75	1	1
113000	1	1	1	1	1	1	0.75	1	1
114000	1	1	1	1	1	1	0.75	1	1
115000	1	1	1	1	1	1	0.75	1	1
116000	1	1	1	1	1	1	0.75	1	1
117000	1	1	1	1	1	1	0.75	1	1
118000	1	1	1	1	1	1	0.818182	1	1
119000	1	1	1	1	1	1	0.909091	1	1
120000	1	1	1	1	1	1	1	1	1
121000	1	1	1	1	1	1	1	1	1
122000	1	1	1	1	1	1	1	1	1
123000	1	1	1	1	1	1	1	1	1
124000	1	1	1	1	1	1	1	1	1
125000	1	1	1	1	1	1	1	1	1
126000	1	1	1	0.931818	1	1	1	1	1
127000	1	1	1	0.863636	1	1	1	1	1
128000	1	1	1	0.863636	1	1	1	1	1
129000	1	1	1	0.863636	1	1	1	1	1
130000	1	1	1	0.863636	1	1	1	1	1
131000	1	1	1	0.863636	1	1	1	1	1
132000	1	1	1	0.795455	1	1	1	1	1
133000	1	1	1	0.795455	1	1	1	1	1
134000	1	1	1	0.795455	1	1	1	1	1
135000	1	1	1	0.795455	1	1	1	1	1
136000	1	1	1	0.795455	1	1	1	1	1
137000	1	1	1	0.863636	1	1	1	1	1
138000	1	1	1	0.931818	1	1	1	1	1
139000	1	1	1	0.863636	1	1	1	1	1
140000	1	1	1	0.863636	1	1	1	1	1
141000	1	1	1	0.863636	1	1	1	1	1
142000	1	1	1	0.863636	1	1	1	1	1
143000	1	1	1	0.931818	1	1	0.931818	1	1
144000	1	1	1	0.931818	1	1	0.840909	0.954545	1
145000	1	1	1	0.931818	1	1	0.840909	0.954545	1
146000	1	1	1	0.931818	1	1	0.840909	0.954545	1
147000	1	1	1	0.931818	1	1	0.772727	0.954545	1
148000	1	1	1	0.931818	1	1	0.772727	0.954545	1
149000	1	1	1	0.931818	1	1	0.772727	0.954545	1
150000	1	1	1	0.931818	1	1	0.772727	0.954545	1
151000	1	1	1	0.931818	1	1	0.772727	0.954545	1
152000	1	1	1	0.931818	1	1	0.704545	0.954545	1
153000	1	1	1	0.931818	1	1	0.704545	0.954545	1
154000	1	1	1	0.931818	1	1	0.704545	0.954545	1
155000	1	1	1	0.931818	1	1	0.795455	1	1
156000	1	1	1	0.931818	1	1	0.795455	1	1
157000	1	1	1	0.931818	1	1	0.727273	1	1
158000	1	1	1	0.931818	1	1	0.795455	1	1
159000	1	1	1	0.931818	1	1	0.795455	1	1
160000	1	1	1	0.931818	1	1	0.795455	1	1
161000	1	1	1	1	1	1	0.795455	1	1
162000	1	1	1	1	1	1	0.795455	1	1
163000	1	1	1	1	1	1	0.863636	1	1
164000	1	1	1	1	1	1	0.863636	1	1
165000	1	1	1	1	1	1	0.931818	1	1
166000	1	1	1	1	1	1	0.931818	1	1
167000	1	1	1	1	1	1	0.931818	1	1
168000	1	1	1	1	1	1	1	1	1
169000	1	1	1	1	1	1	1	1	1
170000	1	1	1	1	1	1	1	1	1
171000	1	1	1	1	1	1	1	1	1
172000	1	1	1	0.909091	1	1	1	1	1
173000	1	1	1	0.840909	1	1	1	1	1
174000	1	1	1	0.772727	1	1	1	1	1
175000	1	1	1	0.772727	1	1	1	1	1
176000	1	1	1	0.772727	1	1	1	1	1
177000	1	1	1	0.772727	1	1	1	1	1
178000	1	1	1	0.772727	1	1	1	1	1
179000	1	1	1	0.772727	1	1	1	1	1
180000	1	1	1	0.772727	1	1	1	1	1
181000	1	1	1	0.772727	1	1	1	1	1
182000	1	1	1	0.681818	1	1	1	1	1
183000	1	1	1	0.772727	1	1	1	1	1
184000	1	1	1	0.840909	1	1	1	1	1
185000	1	1	1	0.909091	1	1	1	1	1
186000	1	1	1	0.840909	1	1	1	1	1
187000	1	1	1	0.840909	1	1	1	1	1
188000	1	1	1	0.75	1	1	1	1	1
189000	1	1	1	0.75	1	1	1	1	1
190000	1	1	1	0.75	1	1	1	1	1
191000	1	1	1	0.75	1	1	1	1	1
192000	1	1	1	0.659091	1	1	1	1	1
193000	1	1	1	0.75	1	1	1	1	1
194000	1	1	1	0.681818	1	1	1	1	1
195000	1	1	1	0.613636	1	1	1	1	1
196000	1	1	1	0.613636	1	1	1	1	1
197000	1	1	1	0.681818	1	1	1	1	1
198000	1	1	1	0.681818	1	1	1	1	1
199000	1	1	1	0.772727	1	1	1	1	1
200000	1	1	1	0.772727	1	1	1	1	1
201000	1	1	1	0.75	1	1	1	1	1
202000	1	1	1	0.722222	1	1	1	1	1
203000	1	1	1	0.8125	1	1	1	1	1
204000	1	1	1	0.785714	1	1	1	1	1
205000	1	1	1	0.875	1	1	1	1	1
206000	1	1	1	1	1	1	1	1	1
207000	1	1	1	1	1	1	1	1	1
208000	1	1	1	1	1	1	1	1	1
209000	1	1	1	1	1	1	1	1	1
