# Supplementary material
Source: ML conference proceedings conference paper supplement (https://openreview.net/forum?id=Lb8ZnWW_In6)
Supplement: supplementary_material [file office_t4.xlsx]

## Sheet: aqrm
0	0	0	0	0	0	0	0	0	0
0	0	0	0	0	0	0	0	0	0
0	0	0	0	0	0	0	0	0	0
0	0	0	0	0	0	0	0	0	0
0	0	0	0	0	0	0	0	0	0
0	0	0	0	0	0	0	0	0	0
0	0	0	0	0	0	0	0	0	0
0	0	0	0	0	0	0	0	0	0
0	0	0	0	0	0	0	0	0	0
0	0	0	0	0	0	0	0	0	0
0	0	0	0	0	0	0	0	0	0
0	0	0	0	0	0	0	0	0	0
0	0	0	0	0	0	0	0	0	0
0	0	0	0	0	0	0	0	0	0
0	0	0	0	0	0	0	0	0	0
0	0	0	0	0	0	0	0	0	0
0	0	0	0	0	1	0	0	0	0
0	0	0	0	0	0	0	0	0	0
0	0	0	0	0	0	0	0	0	0
0	0	0	0	0	0	0	0	0	0
0	0	0	0	0	0	0	0	0	0
0	0	0	0	0	0	0	0	0	0
0	0	0	0	0	0	0	0	0	0
0	0	0	0	0	0	0	1	0	0
0	0	0	0	0	0	0	0	0	0
0	0	0	0	0	0	0	1	0	0
0	0	0	0	0	1	1	0	1	1
0	1	0	0	1	0	0	0	0	0
0	0	0	0	0	0	0	0	0	0
0	1	0	0	1	0	1	0	0	0
1	0	0	0	0	0	1	0	0	0
0	0	0	0	0	0	0	0	0	0
0	0	0	0	0	0	0	0	0	0
0	0	0	0	0	0	0	0	1	1
0	0	0	0	0	0	0	1	0	0
0	0	0	0	0	1	0	0	1	1
0	0	0	0	0	1	0	0	1	0
0	1	0	0	0	0	0	0	1	0
0	0	0	0	0	0	0	0	1	0
0	0	0	0	0	0	1	0	1	0
0	0	1	0	0	0	1	0	1	1
0	0	0	0	0	0	1	0	1	0
0	0	1	0	0	0	1	1	1	0
1	1	1	0	0	0	1	0	1	0
1	0	1	0	0	1	1	0	1	0
0	0	0	1	0	1	1	0	1	1
1	0	0	0	1	0	1	0	1	1
1	0	0	1	1	0	1	0	1	1
0	0	0	1	0	0	1	0	1	1
0	0	1	1	0	0	1	0	1	1
0	0	0	1	0	0	1	1	1	1
0	0	0	1	0	0	1	0	1	1
0	0	1	1	0	0	1	1	1	1
0	0	1	1	1	1	1	0	1	1
0	0	0	1	0	0	1	0	1	1
1	0	0	1	0	1	1	0	1	1
0	1	0	1	0	1	1	0	1	1
0	1	0	1	0	1	1	0	1	1
0	1	0	1	0	1	1	0	1	1
0	1	0	1	0	1	1	0	1	1
0	1	0	1	0	1	1	0	1	1
0	1	0	1	0	1	1	1	1	1
0	1	0	1	0	1	1	1	1	1
0	1	0	1	0	1	1	1	1	1
0	1	1	1	0	1	1	1	1	1
0	1	1	1	1	1	1	1	1	1
0	1	1	1	0	1	1	1	1	1
1	1	1	1	0	1	1	1	1	1
1	1	1	1	0	1	1	1	1	1
1	1	1	1	0	1	1	1	1	1
1	1	1	1	0	1	1	1	1	1
1	1	1	1	0	1	1	1	1	1
1	1	1	1	0	1	1	1	1	1
1	1	1	1	0	1	1	1	1	1
1	1	1	1	1	1	1	1	1	1
1	1	1	1	0	1	1	1	1	1
1	1	1	1	1	1	1	1	1	1
1	1	1	1	1	1	1	1	1	1
1	1	1	1	1	1	1	1	1	1
1	1	1	1	1	1	1	1	1	1
1	1	1	1	1	1	1	1	1	1
1	1	1	1	1	1	1	1	1	1
1	1	1	1	1	1	1	1	1	1
1	1	1	1	1	1	1	1	1	1
1	1	1	1	1	1	1	1	1	1
1	1	1	1	1	1	1	1	1	1
1	1	1	1	1	1	1	1	1	1
1	1	1	1	1	1	1	1	1	1
1	1	1	1	1	1	1	1	1	1
1	1	1	1	1	1	1	1	1	1
1	1	1	1	1	1	1	1	1	1
1	1	1	1	1	1	1	1	1	1
1	1	1	1	1	1	1	1	1	1
1	1	1	1	1	1	1	1	1	1
1	1	1	1	1	1	1	1	1	1
1	1	1	1	1	1	1	1	1	1
1	1	1	1	1	1	1	1	1	1
1	1	1	1	1	1	1	1	1	1
1	1	1	1	1	1	1	1	1	1
1	1	1	1	1	1	1	1	1	1
1	1	1	1	1	1	1	1	1	1
1	1	1	1	1	1	1	1	1	1
1	1	1	1	1	1	1	1	1	1
1	1	1	1	1	1	1	1	1	1
1	1	1	1	1	1	1	1	1	1
1	1	1	1	1	1	1	1	1	1
1	1	1	1	1	1	1	1	1	1
1	1	1	1	1	1	1	1	1	1
1	1	1	1	1	1	1	1	1	1
1	1	1	1	1	1	1	1	1	1
1	1	1	1	1	1	1	1	1	1
1	1	1	1	1	1	1	1	1	1
1	1	1	1	1	1	1	1	1	1
1	1	1	1	1	1	1	1	1	1
1	1	1	1	1	1	1	1	1	1
1	1	1	1	1	1	1	1	1	1
1	1	1	1	1	1	1	1	1	1
1	1	1	1	1	1	1	1	1	1
1	1	1	1	1	1	1	1	1	1
1	1	1	1	1	1	1	1	1	1
1	1	1	1	1	1	1	1	1	1
1	1	1	1	1	1	1	1	1	1
1	1	1	1	1	1	1	1	1	1
1	1	1	1	1	1	1	1	1	1
1	1	1	1	1	1	1	1	1	1
1	1	1	1	1	1	1	1	1	1
1	1	1	1	1	1	1	1	1	1
1	1	1	1	1	1	1	1	1	1
1	1	1	1	1	1	1	1	1	1
1	1	1	1	1	1	1	1	1	1
1	1	1	1	1	1	1	1	1	1
1	1	1	1	1	1	1	1	1	1
1	1	1	1	1	1	1	1	1	1
1	1	1	1	1	1	1	1	1	1
1	1	1	1	1	1	1	1	1	1
1	1	1	1	1	1	1	1	1	1
1	1	1	1	1	1	1	1	1	1
1	1	1	1	1	1	1	1	1	1
1	1	1	1	1	1	1	1	1	1
1	1	1	1	1	1	1	1	1	1
1	1	1	1	1	1	1	1	1	1
1	1	1	1	1	1	1	1	1	1
1	1	1	1	1	1	1	1	1	1
1	1	1	1	1	1	1	1	1	1
1	1	1	1	1	1	1	1	1	1
1	1	1	1	1	1	1	1	1	1
1	1	1	1	1	1	1	1	1	1
1	1	1	1	1	1	1	1	1	1
1	1	1	1	1	1	1	1	1	1
1	1	1	1	1	1	1	1	1	1
1	1	1	1	1	1	1	1	1	1
1	1	1	1	1	1	1	1	1	1
1	1	1	1	1	1	1	1	1	1
1	1	1	1	1	1	1	1	1	1
1	1	1	1	1	1	1	1	1	1
1	1	1	1	1	1	1	1	1	1
1	1	1	1	1	1	1	1	1	1
1	1	1	1	1	1	1	1	1	1
1	1	1	1	1	1	1	1	1	1
1	1	1	1	1	1	1	1	1	1
1	1	1	1	1	1	1	1	1	1
1	1	1	1	1	1	1	1	1	1
1	1	1	1	1	1	1	1	1	1
1	1	1	1	1	1	1	1	1	1
1	1	1	1	1	1	1	1	1	1
1	1	1	1	1	1	1	1	1	1
1	1	1	1	1	1	1	1	1	1
1	1	1	1	1	1	1	1	1	1
1	1	1	1	1	1	1	1	1	1
1	1	1	1	1	1	1	1	1	1
1	1	1	1	1	1	1	1	1	1
1	1	1	1	1	1	1	1	1	1
1	1	1	1	1	1	1	1	1	1
1	1	1	1	1	1	1	1	1	1
1	1	1	1	1	1	1	1	1	1
1	1	1	1	1	1	1	1	1	1
1	1	1	1	1	1	1	1	1	1
1	1	1	1	1	1	1	1	1	1
1	1	1	1	1	1	1	1	1	1
1	1	1	1	1	1	1	1	1	1
1	1	1	1	1	1	1	1	1	1
1	1	1	1	1	1	1	1	1	1
1	1	1	1	1	1	1	1	1	1
1	1	1	1	1	1	1	1	1	1
1	1	1	1	1	1	1	1	1	1
1	1	1	1	1	1	1	1	1	1
1	1	1	1	1	1	1	1	1	1
1	1	1	1	1	1	1	1	1	1
1	1	1	1	1	1	1	1	1	1
1	1	1	1	1	1	1	1	1	1
1	1	1	1	1	1	1	1	1	1
1	1	1	1	1	1	1	1	1	1
1	1	1	1	1	1	1	1	1	1
1	1	1	1	1	1	1	1	1	1
1	1	1	1	1	1	1	1	1	1
1	1	1	1	1	1	1	1	1	1
1	1	1	1	1	1	1	1	1	1
1	1	1	1	1	1	1	1	1	1
1	1	1	1	1	1	1	1	1	1
1	1	1	1	1	1	1	1	1	1

## Sheet: hrl
0	0	0	0	0	0	0	0	0	0
1	1	0	0	0	0	0	0	0	0
0	0	0	0	0	0	0	0	0	0
0	0	0	0	0	0	0	0	0	0
0	0	0	0	0	1	0	0	0	0
0	0	0	0	0	0	0	0	1	0
0	0	0	0	0	0	1	0	0	0
0	0	0	0	1	0	0	0	0	0
0	0	1	0	1	0	1	0	0	0
0	0	0	1	0	0	0	0	0	0
0	0	0	0	0	0	0	0	1	0
0	0	0	0	0	0	0	0	0	0
0	0	0	0	0	0	0	0	0	0
0	0	0	0	0	0	0	0	0	0
1	1	0	0	0	0	0	0	0	0
0	1	1	0	0	0	0	0	0	0
0	0	0	0	0	0	0	0	0	0
0	0	0	0	1	0	0	0	0	0
1	0	0	0	0	0	1	1	0	0
0	0	0	0	0	0	0	0	0	1
0	0	0	1	0	0	0	0	0	0
0	0	0	0	0	0	0	0	0	0
0	0	0	0	0	0	0	0	0	0
0	0	0	0	0	0	0	0	0	0
0	0	0	1	0	0	0	0	0	1
0	0	0	0	0	0	1	0	0	1
0	0	0	0	0	0	0	1	0	0
0	0	0	0	0	0	0	0	0	0
0	0	0	0	0	0	1	0	1	0
0	1	0	0	0	0	0	0	0	0
1	0	0	0	0	0	0	0	1	1
0	0	0	0	0	0	0	0	0	0
0	0	0	0	0	0	0	0	0	0
0	0	0	0	0	0	0	0	0	0
1	0	0	0	0	0	0	0	1	0
0	0	0	0	1	0	0	0	1	0
1	0	0	0	0	0	0	1	0	0
0	1	0	0	0	0	0	0	0	0
0	0	0	0	0	0	0	0	0	0
1	0	0	0	0	0	0	1	0	0
0	0	0	0	0	0	0	0	0	0
0	0	0	0	0	0	0	0	0	0
0	0	0	0	0	1	0	0	0	0
0	1	0	0	0	0	0	0	0	0
0	0	0	0	0	0	0	0	0	0
0	0	0	0	0	0	0	0	0	0
0	0	0	0	0	0	0	0	0	0
0	1	0	0	0	0	0	0	0	0
0	0	1	0	0	0	0	0	0	0
0	0	0	0	1	0	0	0	1	0
0	0	0	0	0	0	0	0	0	0
0	0	0	0	1	0	0	0	1	0
1	0	0	0	0	0	0	0	0	0
0	0	1	0	0	0	0	0	0	0
0	0	0	1	0	0	0	0	0	0
0	0	0	0	0	0	0	0	0	0
0	0	1	0	0	0	0	0	0	0
0	0	0	0	0	0	0	0	0	0
0	0	0	1	0	0	0	0	0	0
0	1	0	0	0	0	0	0	0	0
0	0	0	0	0	0	0	0	0	1
0	0	0	0	0	0	0	1	0	0
0	0	0	0	0	0	0	0	1	0
0	1	0	0	0	0	1	0	0	1
0	0	0	0	0	0	0	1	0	0
0	0	0	0	0	0	0	0	0	0
0	1	0	0	0	0	0	0	0	0
0	0	0	0	0	0	0	1	0	0
0	0	0	0	0	0	0	0	0	0
0	0	0	0	0	0	0	0	0	0
0	0	0	1	0	0	0	0	1	0
1	0	0	1	0	0	0	0	0	0
0	0	0	0	0	0	0	0	0	0
0	0	0	0	0	0	0	0	0	0
0	1	0	0	0	0	0	0	1	0
0	0	0	0	1	0	0	0	0	0
0	0	0	0	0	0	0	0	0	0
0	0	0	0	0	0	0	0	0	1
0	0	0	0	0	0	0	0	0	0
0	0	0	0	0	1	0	0	0	0
0	0	1	0	0	0	0	0	0	0
0	0	0	0	0	0	0	0	0	0
0	0	0	0	0	0	0	0	0	0
0	0	0	0	0	0	0	0	0	1
0	0	0	0	0	0	0	0	0	0
0	0	0	0	0	0	0	0	0	0
0	0	0	0	0	0	0	0	0	0
0	0	1	0	0	0	0	0	0	0
0	0	1	0	0	0	0	0	0	1
0	0	0	0	0	0	0	0	1	0
1	0	1	0	0	0	0	0	0	0
0	0	0	0	0	0	0	0	0	0
0	0	0	0	0	0	0	1	0	0
0	0	0	0	0	0	0	0	1	1
0	0	0	0	0	0	0	0	0	0
0	0	0	0	0	0	0	0	0	0
0	0	0	0	0	0	0	0	0	0
0	0	0	0	0	0	0	0	1	1
0	0	0	0	1	0	0	0	0	0
0	0	0	0	0	0	0	0	0	1
0	1	0	0	1	0	0	0	0	0
0	0	0	0	0	0	0	0	0	0
0	0	0	0	0	0	0	0	0	0
0	0	0	0	0	0	0	0	0	0
0	0	0	0	0	0	0	0	1	0
0	0	0	1	0	0	0	0	0	0
0	1	0	0	0	0	0	0	0	0
0	0	0	0	0	1	0	0	0	0
0	0	0	0	0	0	0	0	0	0
0	0	0	0	0	0	0	0	0	0
0	0	0	0	0	0	0	0	0	0
0	0	0	0	0	1	0	0	0	1
0	0	0	0	0	0	0	0	0	0
0	0	0	0	0	0	0	0	0	0
0	0	0	0	0	0	1	0	0	0
0	0	0	0	0	0	0	0	0	0
0	0	0	0	0	0	0	0	1	0
0	0	0	0	0	0	0	0	0	0
0	0	0	0	0	0	0	0	0	0
0	0	0	0	0	0	0	0	0	0
0	0	0	0	0	0	0	0	0	0
0	0	0	0	0	1	0	0	0	0
0	0	0	0	0	0	0	0	0	0
0	0	0	0	0	0	0	0	0	0
0	0	0	0	0	0	0	0	0	0
0	1	0	0	0	0	0	0	0	0
1	0	0	0	1	0	0	0	0	0
0	0	0	1	0	0	0	0	0	0
0	0	0	0	0	0	0	0	0	0
0	0	0	0	0	0	0	0	0	0
0	0	0	0	1	0	0	0	0	0
0	0	0	0	0	0	0	0	0	0
0	0	0	0	0	1	0	0	0	0
0	0	0	0	0	0	1	0	0	0
0	0	0	0	0	0	0	0	1	0
0	0	0	0	1	0	0	1	0	0
0	0	1	0	0	0	0	1	0	0
0	0	0	0	0	0	0	0	0	0
0	0	1	0	0	0	0	1	0	0
0	0	0	0	0	0	0	0	0	0
0	0	0	0	0	0	0	0	0	1
1	0	0	1	0	0	0	0	0	0
0	0	1	0	1	0	0	0	0	0
0	0	0	1	0	0	0	0	0	0
0	0	0	0	0	1	0	1	0	1
0	0	0	0	0	0	0	0	0	0
0	0	0	0	0	0	0	0	0	0
0	0	0	0	0	0	0	0	0	0
0	0	0	0	0	0	0	0	1	0
0	0	0	0	0	0	0	0	1	1
0	0	0	0	0	0	0	0	0	0
0	0	0	1	0	0	0	0	0	0
0	0	0	0	0	0	0	0	0	0
0	0	0	0	0	0	0	0	0	0
0	0	0	0	1	0	0	0	0	0
0	0	0	0	0	0	0	0	0	0
0	0	0	0	1	0	0	0	0	1
0	0	0	0	0	0	0	0	0	0
0	0	0	0	0	1	0	0	0	0
0	0	0	0	0	0	0	0	0	0
0	0	0	0	0	0	0	0	0	0
0	0	0	1	0	0	0	1	0	0
0	0	0	0	0	0	0	0	0	0
0	0	0	0	0	0	0	0	0	0
0	0	0	0	0	0	0	0	0	0
0	0	0	0	0	0	0	0	0	0
0	0	0	0	0	0	0	0	0	0
0	0	0	0	0	0	0	0	0	1
0	0	0	0	0	0	0	0	0	0
0	0	0	0	0	0	0	0	0	0
0	0	0	0	0	0	0	0	0	1
0	0	1	0	0	0	0	0	0	0
0	0	0	0	0	0	0	0	0	0
0	0	0	0	0	0	0	0	0	0
0	0	0	0	0	0	0	0	0	0
0	0	1	0	0	0	0	0	0	0
0	0	0	0	0	0	0	0	0	0
0	0	0	0	0	0	0	0	0	0
0	0	0	0	0	0	0	0	0	0
0	0	0	0	0	0	0	0	0	0
0	0	0	0	0	0	0	0	0	1
0	0	0	0	0	0	0	0	0	0
0	1	0	0	0	0	0	0	0	1
0	0	1	0	0	0	0	0	0	0
0	0	0	0	0	0	0	1	0	0
1	0	0	0	0	0	0	0	0	0
0	0	0	0	0	0	0	1	0	0
0	0	1	0	0	0	0	0	0	0
0	0	0	0	0	0	0	0	0	0
0	0	1	0	0	1	0	0	0	0
0	0	0	0	0	0	0	0	1	0
0	0	0	0	0	0	0	0	0	0
0	0	0	0	0	1	0	0	0	0
0	0	0	0	0	0	0	0	0	0
0	0	0	0	0	0	0	0	0	0
0	0	0	0	0	0	0	0	0	0
0	0	0	0	0	0	0	0	0	0
0	0	0	0	0	0	0	1	0	1
0	0	0	0	0	0	0	0	0	0
0	0	0	1	0	0	0	0	1	0

## Sheet: qlearn
0	0	0	0	1	1	0	1	0	0
0	0	0	0	0	0	0	0	0	0
0	0	0	0	0	0	0	0	0	0
1	0	0	0	0	0	0	0	0	1
0	0	0	0	0	0	0	0	0	0
0	0	0	0	0	0	1	0	0	0
0	0	0	0	0	0	0	0	0	0
0	0	0	0	0	0	0	0	0	1
0	0	1	0	0	0	0	0	0	1
0	0	0	0	0	0	0	0	0	0
0	0	0	0	1	0	0	0	0	0
0	0	0	0	1	0	0	0	0	0
0	0	0	0	0	0	0	0	0	0
0	0	0	0	0	0	0	0	0	0
0	0	0	0	0	0	0	1	0	0
0	0	0	0	1	0	0	0	0	0
0	0	0	0	0	1	0	0	0	0
0	1	0	0	0	0	1	0	0	0
0	0	0	1	0	0	0	0	0	0
0	1	0	0	0	1	0	0	0	0
0	0	0	0	0	1	0	0	0	1
0	0	0	0	0	0	0	0	0	0
1	0	0	0	0	0	0	1	1	0
0	0	0	0	0	0	0	0	0	0
0	0	0	0	0	0	0	1	0	0
0	0	0	0	0	0	0	0	0	0
0	0	0	0	0	0	1	0	1	1
0	0	1	0	1	0	0	0	0	1
1	1	0	0	0	0	0	0	0	0
1	0	1	0	0	0	0	0	0	0
0	0	0	1	0	0	1	1	0	1
0	0	0	0	0	0	0	0	0	0
1	0	0	0	1	0	0	0	0	0
0	0	0	1	0	1	0	0	1	1
0	0	0	0	0	0	0	0	0	0
0	1	0	0	1	1	0	0	0	0
0	0	0	0	0	0	0	0	0	0
0	1	0	0	0	1	1	0	0	0
1	0	0	0	0	0	0	1	0	0
0	0	0	1	1	1	0	0	0	0
0	1	0	0	0	0	0	0	0	1
0	1	0	0	0	0	1	0	0	0
0	0	0	0	0	0	0	1	0	0
0	1	0	0	0	0	0	0	0	0
0	1	0	0	0	0	0	0	0	0
1	0	0	0	0	0	0	0	0	0
0	0	0	1	1	0	0	0	0	0
0	0	0	0	0	0	0	0	0	0
0	0	0	1	0	1	0	0	0	0
0	0	0	0	0	0	0	0	0	0
1	0	0	0	0	0	0	0	0	0
0	0	0	0	0	0	0	0	0	0
0	0	0	0	0	1	0	0	1	0
0	0	0	0	0	1	0	0	0	1
0	1	0	1	0	0	0	0	1	1
0	0	0	0	0	0	0	0	0	0
0	0	1	0	0	0	0	0	0	0
1	0	0	0	0	0	0	0	0	0
0	0	0	0	0	0	0	0	0	0
0	0	1	1	0	0	0	0	0	0
0	0	0	0	1	0	0	0	0	0
0	0	0	0	0	0	0	0	0	0
0	0	0	0	0	0	0	0	0	0
0	0	0	0	1	1	1	0	0	0
0	0	0	0	0	0	0	0	0	1
0	0	0	0	1	0	0	0	0	1
0	0	0	0	1	1	0	0	0	1
0	0	0	0	0	0	0	1	0	0
0	0	0	0	1	0	0	0	0	0
0	0	0	1	0	0	1	0	0	0
0	0	0	0	0	0	0	0	0	0
0	0	0	1	0	0	0	0	1	0
0	1	0	0	1	0	0	0	0	0
0	0	1	0	1	1	0	0	0	0
0	0	0	1	0	0	0	0	0	0
0	1	0	0	0	0	0	0	0	0
0	0	0	0	1	0	0	0	0	0
0	0	0	0	0	0	1	0	0	0
0	0	0	0	0	0	0	0	0	0
0	0	1	0	1	0	0	0	0	0
0	0	0	0	0	0	0	0	0	0
0	0	0	0	1	0	0	0	0	0
1	0	0	0	0	0	1	0	0	0
0	0	1	0	0	1	0	0	1	0
0	0	0	1	1	0	0	1	0	0
0	0	0	0	1	0	0	0	0	0
0	0	0	0	0	0	0	0	0	0
0	0	0	0	1	1	0	1	1	0
0	0	0	0	1	0	0	0	0	1
0	0	0	0	0	0	0	1	1	0
0	0	0	0	0	0	0	0	0	0
0	0	0	0	0	0	0	0	0	0
0	0	0	0	0	0	0	1	0	0
0	0	0	0	0	1	0	0	0	0
0	0	0	1	0	0	1	1	0	0
0	0	0	0	0	1	0	0	1	0
0	0	0	0	1	0	0	0	0	0
0	0	0	0	1	0	0	0	0	0
0	1	0	0	0	1	0	0	0	0
0	0	0	0	0	0	0	0	0	0
0	0	1	0	0	0	0	0	0	0
0	0	0	0	0	0	0	0	0	0
0	1	0	0	0	0	0	0	0	1
0	0	0	0	0	0	0	0	0	0
0	0	0	1	0	0	0	0	0	0
0	0	0	0	0	0	0	0	0	1
1	0	1	0	0	0	0	0	1	0
0	0	0	0	0	1	0	0	0	0
0	0	0	0	0	0	0	1	0	0
0	1	0	1	0	1	0	1	0	0
0	0	0	0	1	0	0	1	0	0
0	0	0	1	0	0	0	1	0	0
0	0	0	0	0	0	0	0	0	1
1	1	1	0	0	0	0	0	0	0
0	0	0	1	0	1	1	1	0	0
0	0	0	0	0	0	0	0	0	1
0	1	0	0	0	0	0	1	1	0
0	1	0	0	0	0	0	1	0	0
1	0	1	0	0	1	0	0	0	0
0	0	0	1	0	0	0	0	0	0
0	0	0	0	0	0	0	0	0	0
0	0	0	1	0	0	0	0	0	0
0	1	0	0	0	0	0	0	1	0
1	0	0	1	0	0	0	0	0	0
1	0	1	0	1	0	0	0	0	0
0	0	0	0	1	0	0	1	0	0
0	0	0	0	0	1	0	0	1	0
0	0	0	0	0	0	0	0	0	0
0	1	0	1	1	0	0	0	0	0
0	0	0	1	0	0	1	0	0	0
0	1	0	0	0	1	0	0	0	0
1	0	0	0	0	0	0	0	0	0
1	0	0	1	0	1	1	0	0	0
0	0	0	0	0	0	0	0	0	0
0	0	0	1	1	0	0	1	1	0
0	0	0	0	0	1	0	0	0	0
0	1	0	1	0	0	0	0	1	0
0	1	1	0	0	0	1	1	0	0
0	0	0	0	0	0	0	0	0	0
0	0	1	0	0	0	0	0	0	0
1	0	0	0	1	0	0	0	0	0
0	0	1	0	0	0	0	0	0	0
1	1	0	0	0	0	0	0	1	0
0	0	0	0	0	0	0	1	0	0
0	0	1	0	0	0	0	1	0	1
0	0	0	0	0	0	0	0	0	0
0	0	1	1	0	0	0	0	0	0
1	0	0	0	0	0	0	0	0	0
0	1	0	0	0	0	0	0	1	0
0	0	0	1	0	0	0	0	0	0
0	0	1	0	0	0	0	0	0	0
1	0	0	0	0	0	0	0	0	0
0	0	0	0	1	0	0	0	1	0
1	0	0	0	1	0	0	0	0	0
0	1	0	0	0	0	0	1	0	0
0	0	0	0	1	0	0	0	0	0
0	0	0	0	0	0	0	0	0	0
0	0	1	0	0	1	0	0	0	0
0	0	0	0	0	1	0	0	0	0
0	0	0	0	0	0	0	1	0	0
1	0	0	0	0	0	1	0	1	0
0	1	0	0	0	0	0	0	0	0
0	0	0	0	0	1	0	1	0	0
0	0	0	1	0	1	0	0	0	1
0	1	0	0	1	0	0	0	0	1
1	1	0	0	1	0	0	1	0	0
0	0	0	0	0	0	0	0	0	0
1	0	0	0	0	0	0	1	1	1
0	0	0	0	0	1	0	0	0	0
0	0	0	0	1	0	0	1	0	0
0	0	0	1	0	0	1	1	0	0
0	0	1	1	0	0	0	0	0	0
0	1	0	0	0	0	0	0	0	0
0	0	0	1	0	0	0	0	0	0
1	0	0	0	0	1	0	0	0	0
1	0	0	0	0	0	1	0	0	0
0	0	0	0	1	0	0	0	0	0
1	1	0	1	0	0	0	0	0	1
0	0	0	0	1	0	0	0	0	1
0	0	0	0	0	1	0	1	0	0
1	0	0	1	0	1	1	0	0	1
1	0	0	0	0	0	0	0	0	0
0	0	0	0	0	1	1	0	0	0
0	1	0	0	0	0	0	1	0	0
1	0	0	0	0	0	0	0	0	0
1	0	0	0	0	1	1	0	0	0
0	0	0	1	0	0	0	0	0	0
1	0	0	0	0	1	1	0	1	0
0	0	1	1	1	0	0	1	0	0
0	0	0	0	0	1	0	0	0	0
0	0	0	0	0	1	1	0	0	0
1	1	0	0	1	0	0	0	0	0
0	0	0	0	1	0	1	0	0	0
0	0	0	0	0	0	1	0	0	0
0	0	0	0	0	0	1	0	0	0
0	0	0	0	0	0	0	1	0	1
0	1	0	0	0	0	0	0	0	0
0	0	0	0	0	0	0	0	0	0
0	0	0	0	0	0	0	1	0	0
0	0	0	0	0	1	0	1	0	0

## Sheet: together
steps	25th	50th	75th	25th	50th	75th	25th	50th	75th
1000	0	0	0	0	0	0.75	0	0	0
2000	0	0	0	0	0	0	0	0	0
3000	0	0	0	0	0	0	0	0	0
4000	0	0	0	0	0	0	0	0	0
5000	0	0	0	0	0	0	0	0	0
6000	0	0	0	0	0	0	0	0	0
7000	0	0	0	0	0	0	0	0	0
8000	0	0	0	0	0	0	0	0	0
9000	0	0	0	0	0	0	0	0	0.75
10000	0	0	0	0	0	0	0	0	0
11000	0	0	0	0	0	0	0	0	0
12000	0	0	0	0	0	0	0	0	0
13000	0	0	0	0	0	0	0	0	0
14000	0	0	0	0	0	0	0	0	0
15000	0	0	0	0	0	0	0	0	0
16000	0	0	0	0	0	0	0	0	0
17000	0	0	0	0	0	0	0	0	0
18000	0	0	0	0	0	0	0	0	0
19000	0	0	0	0	0	0	0	0	0.75
20000	0	0	0	0	0	0	0	0	0
21000	0	0	0	0	0	0	0	0	0
22000	0	0	0	0	0	0	0	0	0
23000	0	0	0	0	0	0.75	0	0	0
24000	0	0	0	0	0	0	0	0	0
25000	0	0	0	0	0	0	0	0	0
26000	0	0	0	0	0	0	0	0	0
27000	0	0	1	0	0	0.75	0	0	0
28000	0	0	0	0	0	0.75	0	0	0
29000	0	0	0	0	0	0	0	0	0
30000	0	0	0.75	0	0	0	0	0	0
31000	0	0	0	0	0	1	0	0	0.75
32000	0	0	0	0	0	0	0	0	0
33000	0	0	0	0	0	0	0	0	0
34000	0	0	0	0	0	1	0	0	0
35000	0	0	0	0	0	0	0	0	0
36000	0	0	0.75	0	0	0.75	0	0	0
37000	0	0	0	0	0	0	0	0	0
38000	0	0	0	0	0	0.75	0	0	0
39000	0	0	0	0	0	0	0	0	0
40000	0	0	0	0	0	0.75	0	0	0
41000	0	0	1	0	0	0	0	0	0
42000	0	0	0	0	0	0	0	0	0
43000	0	0	1	0	0	0	0	0	0
44000	0	0.5	1	0	0	0	0	0	0
45000	0	0.5	1	0	0	0	0	0	0
46000	0	0.5	1	0	0	0	0	0	0
47000	0	0.5	1	0	0	0	0	0	0
48000	0	1	1	0	0	0	0	0	0
49000	0	0	1	0	0	0	0	0	0
50000	0	0.5	1	0	0	0	0	0	0
51000	0	0.5	1	0	0	0	0	0	0
52000	0	0	1	0	0	0	0	0	0
53000	0	1	1	0	0	0	0	0	0
54000	0.25	1	1	0	0	0	0	0	0
55000	0	0	1	0	0	1	0	0	0
56000	0	1	1	0	0	0	0	0	0
57000	0	1	1	0	0	0	0	0	0
58000	0	1	1	0	0	0	0	0	0
59000	0	1	1	0	0	0	0	0	0
60000	0	1	1	0	0	0	0	0	0
61000	0	1	1	0	0	0	0	0	0
62000	0.25	1	1	0	0	0	0	0	0
63000	0.25	1	1	0	0	0	0	0	0
64000	0.25	1	1	0	0	0.75	0	0	0.75
65000	1	1	1	0	0	0	0	0	0
66000	1	1	1	0	0	0	0	0	0
67000	1	1	1	0	0	0.75	0	0	0
68000	1	1	1	0	0	0	0	0	0
69000	1	1	1	0	0	0	0	0	0
70000	1	1	1	0	0	0	0	0	0
71000	1	1	1	0	0	0	0	0	0
72000	1	1	1	0	0	0	0	0	0
73000	1	1	1	0	0	0	0	0	0
74000	1	1	1	0	0	0.75	0	0	0
75000	1	1	1	0	0	0	0	0	0
76000	1	1	1	0	0	0	0	0	0
77000	1	1	1	0	0	0	0	0	0
78000	1	1	1	0	0	0	0	0	0
79000	1	1	1	0	0	0	0	0	0
80000	1	1	1	0	0	0	0	0	0
81000	1	1	1	0	0	0	0	0	0
82000	1	1	1	0	0	0	0	0	0
83000	1	1	1	0	0	0	0	0	0
84000	1	1	1	0	0	0.75	0	0	0
85000	1	1	1	0	0	0.75	0	0	0
86000	1	1	1	0	0	0	0	0	0
87000	1	1	1	0	0	0	0	0	0
88000	1	1	1	0	0	1	0	0	0
89000	1	1	1	0	0	0	0	0	0
90000	1	1	1	0	0	0	0	0	0
91000	1	1	1	0	0	0	0	0	0
92000	1	1	1	0	0	0	0	0	0
93000	1	1	1	0	0	0	0	0	0
94000	1	1	1	0	0	0	0	0	0
95000	1	1	1	0	0	0.75	0	0	0
96000	1	1	1	0	0	0	0	0	0
97000	1	1	1	0	0	0	0	0	0
98000	1	1	1	0	0	0	0	0	0
99000	1	1	1	0	0	0	0	0	0
100000	1	1	1	0	0	0	0	0	0
101000	1	1	1	0	0	0	0	0	0
102000	1	1	1	0	0	0	0	0	0
103000	1	1	1	0	0	0	0	0	0
104000	1	1	1	0	0	0	0	0	0
105000	1	1	1	0	0	0	0	0	0
106000	1	1	1	0	0	0	0	0	0
107000	1	1	1	0	0	0.75	0	0	0
108000	1	1	1	0	0	0	0	0	0
109000	1	1	1	0	0	0	0	0	0
110000	1	1	1	0	0	1	0	0	0
111000	1	1	1	0	0	0	0	0	0
112000	1	1	1	0	0	0	0	0	0
113000	1	1	1	0	0	0	0	0	0
114000	1	1	1	0	0	0.75	0	0	0
115000	1	1	1	0	0	1	0	0	0
116000	1	1	1	0	0	0	0	0	0
117000	1	1	1	0	0	0.75	0	0	0
118000	1	1	1	0	0	0	0	0	0
119000	1	1	1	0	0	0.75	0	0	0
120000	1	1	1	0	0	0	0	0	0
121000	1	1	1	0	0	0	0	0	0
122000	1	1	1	0	0	0	0	0	0
123000	1	1	1	0	0	0	0	0	0
124000	1	1	1	0	0	0	0	0	0
125000	1	1	1	0	0	0.75	0	0	0
126000	1	1	1	0	0	0	0	0	0
127000	1	1	1	0	0	0	0	0	0
128000	1	1	1	0	0	0	0	0	0
129000	1	1	1	0	0	0.75	0	0	0
130000	1	1	1	0	0	0	0	0	0
131000	1	1	1	0	0	0	0	0	0
132000	1	1	1	0	0	0	0	0	0
133000	1	1	1	0	0	1	0	0	0
134000	1	1	1	0	0	0	0	0	0
135000	1	1	1	0	0	1	0	0	0
136000	1	1	1	0	0	0	0	0	0
137000	1	1	1	0	0	0.75	0	0	0
138000	1	1	1	0	0	1	0	0	0
139000	1	1	1	0	0	0	0	0	0
140000	1	1	1	0	0	0	0	0	0
141000	1	1	1	0	0	0	0	0	0
142000	1	1	1	0	0	0	0	0	0
143000	1	1	1	0	0	0.75	0	0	0
144000	1	1	1	0	0	0	0	0	0
145000	1	1	1	0	0	0.75	0	0	0.75
146000	1	1	1	0	0	0	0	0	0
147000	1	1	1	0	0	0	0	0	0
148000	1	1	1	0	0	0	0	0	0
149000	1	1	1	0	0	0	0	0	0
150000	1	1	1	0	0	0	0	0	0
151000	1	1	1	0	0	0	0	0	0
152000	1	1	1	0	0	0	0	0	0
153000	1	1	1	0	0	0	0	0	0
154000	1	1	1	0	0	0	0	0	0
155000	1	1	1	0	0	0	0	0	0
156000	1	1	1	0	0	0	0	0	0
157000	1	1	1	0	0	0	0	0	0
158000	1	1	1	0	0	0	0	0	0
159000	1	1	1	0	0	0	0	0	0
160000	1	1	1	0	0	0	0	0	0
161000	1	1	1	0	0	0.75	0	0	0
162000	1	1	1	0	0	0	0	0	0
163000	1	1	1	0	0	0	0	0	0
164000	1	1	1	0	0	0.75	0	0	0
165000	1	1	1	0	0	0.75	0	0	0
166000	1	1	1	0	0	1	0	0	0
167000	1	1	1	0	0	0	0	0	0
168000	1	1	1	0	0	1	0	0	0
169000	1	1	1	0	0	0	0	0	0
170000	1	1	1	0	0	0	0	0	0
171000	1	1	1	0	0	0.75	0	0	0
172000	1	1	1	0	0	0	0	0	0
173000	1	1	1	0	0	0	0	0	0
174000	1	1	1	0	0	0	0	0	0
175000	1	1	1	0	0	0	0	0	0
176000	1	1	1	0	0	0	0	0	0
177000	1	1	1	0	0	0	0	0	0
178000	1	1	1	0	0	1	0	0	0
179000	1	1	1	0	0	0	0	0	0
180000	1	1	1	0	0	0	0	0	0
181000	1	1	1	0	0.5	1	0	0	0
182000	1	1	1	0	0	0	0	0	0
183000	1	1	1	0	0	0	0	0	0
184000	1	1	1	0	0	0	0	0	0
185000	1	1	1	0	0	0	0	0	0
186000	1	1	1	0	0	0.75	0	0	0
187000	1	1	1	0	0	0	0	0	0
188000	1	1	1	0	0	1	0	0	0
189000	1	1	1	0	0	1	0	0	0
190000	1	1	1	0	0	0	0	0	0
191000	1	1	1	0	0	0	0	0	0
192000	1	1	1	0	0	0.75	0	0	0
193000	1	1	1	0	0	0	0	0	0
194000	1	1	1	0	0	0	0	0	0
195000	1	1	1	0	0	0	0	0	0
196000	1	1	1	0	0	0	0	0	0
197000	1	1	1	0	0	0	0	0	0
198000	1	1	1	0	0	0	0	0	0
199000	1	1	1	0	0	0	0	0	0
200000	1	1	1	0	0	0	0	0	0

## Sheet: final percentiles
0	0	0	0	0	0	0	0	0	0
1000	0	0	0	0	0	0.75	0	0	0
2000	0	0	0	0	0	0.375	0	0	0
3000	0	0	0	0	0	0.25	0	0	0
4000	0	0	0	0	0	0.1875	0	0	0
5000	0	0	0	0	0	0.15	0	0	0
6000	0	0	0	0	0	0.125	0	0	0
7000	0	0	0	0	0	0.107143	0	0	0
8000	0	0	0	0	0	0.09375	0	0	0
9000	0	0	0	0	0	0.0833333	0	0	0.0833333
10000	0	0	0	0	0	0.075	0	0	0.075
11000	0	0	0	0	0	0	0	0	0.075
12000	0	0	0	0	0	0	0	0	0.075
13000	0	0	0	0	0	0	0	0	0.075
14000	0	0	0	0	0	0	0	0	0.075
15000	0	0	0	0	0	0	0	0	0.075
16000	0	0	0	0	0	0	0	0	0.075
17000	0	0	0	0	0	0	0	0	0.075
18000	0	0	0	0	0	0	0	0	0.075
19000	0	0	0	0	0	0	0	0	0.075
20000	0	0	0	0	0	0	0	0	0.075
21000	0	0	0	0	0	0	0	0	0.075
22000	0	0	0	0	0	0	0	0	0.075
23000	0	0	0	0	0	0.075	0	0	0.075
24000	0	0	0	0	0	0.075	0	0	0.075
25000	0	0	0	0	0	0.075	0	0	0.075
26000	0	0	0	0	0	0.075	0	0	0.075
27000	0	0	0.1	0	0	0.15	0	0	0.075
28000	0	0	0.1	0	0	0.225	0	0	0.075
29000	0	0	0.1	0	0	0.225	0	0	0
30000	0	0	0.175	0	0	0.225	0	0	0
31000	0	0	0.175	0	0	0.325	0	0	0.075
32000	0	0	0.175	0	0	0.325	0	0	0.075
33000	0	0	0.175	0	0	0.25	0	0	0.075
34000	0	0	0.175	0	0	0.35	0	0	0.075
35000	0	0	0.175	0	0	0.35	0	0	0.075
36000	0	0	0.25	0	0	0.425	0	0	0.075
37000	0	0	0.15	0	0	0.35	0	0	0.075
38000	0	0	0.15	0	0	0.35	0	0	0.075
39000	0	0	0.15	0	0	0.35	0	0	0.075
40000	0	0	0.075	0	0	0.425	0	0	0.075
41000	0	0	0.175	0	0	0.325	0	0	0
42000	0	0	0.175	0	0	0.325	0	0	0
43000	0	0	0.275	0	0	0.325	0	0	0
44000	0	0.05	0.375	0	0	0.225	0	0	0
45000	0	0.1	0.475	0	0	0.225	0	0	0
46000	0	0.15	0.5	0	0	0.15	0	0	0
47000	0	0.2	0.6	0	0	0.15	0	0	0
48000	0	0.3	0.7	0	0	0.075	0	0	0
49000	0	0.3	0.8	0	0	0.075	0	0	0
50000	0	0.35	0.9	0	0	0	0	0	0
51000	0	0.4	0.9	0	0	0	0	0	0
52000	0	0.4	1	0	0	0	0	0	0
53000	0	0.5	1	0	0	0	0	0	0
54000	0.025	0.55	1	0	0	0	0	0	0
55000	0.025	0.5	1	0	0	0.1	0	0	0
56000	0.025	0.55	1	0	0	0.1	0	0	0
57000	0.025	0.6	1	0	0	0.1	0	0	0
58000	0.025	0.6	1	0	0	0.1	0	0	0
59000	0.025	0.7	1	0	0	0.1	0	0	0
60000	0.025	0.75	1	0	0	0.1	0	0	0
61000	0.025	0.8	1	0	0	0.1	0	0	0
62000	0.05	0.9	1	0	0	0.1	0	0	0
63000	0.075	0.9	1	0	0	0.1	0	0	0
64000	0.075	0.9	1	0	0	0.175	0	0	0.075
65000	0.175	1	1	0	0	0.075	0	0	0.075
66000	0.275	1	1	0	0	0.075	0	0	0.075
67000	0.375	1	1	0	0	0.15	0	0	0.075
68000	0.475	1	1	0	0	0.15	0	0	0.075
69000	0.575	1	1	0	0	0.15	0	0	0.075
70000	0.675	1	1	0	0	0.15	0	0	0.075
71000	0.775	1	1	0	0	0.15	0	0	0.075
72000	0.85	1	1	0	0	0.15	0	0	0.075
73000	0.925	1	1	0	0	0.15	0	0	0.075
74000	1	1	1	0	0	0.15	0	0	0
75000	1	1	1	0	0	0.15	0	0	0
76000	1	1	1	0	0	0.15	0	0	0
77000	1	1	1	0	0	0.075	0	0	0
78000	1	1	1	0	0	0.075	0	0	0
79000	1	1	1	0	0	0.075	0	0	0
80000	1	1	1	0	0	0.075	0	0	0
81000	1	1	1	0	0	0.075	0	0	0
82000	1	1	1	0	0	0.075	0	0	0
83000	1	1	1	0	0	0.075	0	0	0
84000	1	1	1	0	0	0.075	0	0	0
85000	1	1	1	0	0	0.15	0	0	0
86000	1	1	1	0	0	0.15	0	0	0
87000	1	1	1	0	0	0.15	0	0	0
88000	1	1	1	0	0	0.25	0	0	0
89000	1	1	1	0	0	0.25	0	0	0
90000	1	1	1	0	0	0.25	0	0	0
91000	1	1	1	0	0	0.25	0	0	0
92000	1	1	1	0	0	0.25	0	0	0
93000	1	1	1	0	0	0.25	0	0	0
94000	1	1	1	0	0	0.175	0	0	0
95000	1	1	1	0	0	0.175	0	0	0
96000	1	1	1	0	0	0.175	0	0	0
97000	1	1	1	0	0	0.175	0	0	0
98000	1	1	1	0	0	0.075	0	0	0
99000	1	1	1	0	0	0.075	0	0	0
100000	1	1	1	0	0	0.075	0	0	0
101000	1	1	1	0	0	0.075	0	0	0
102000	1	1	1	0	0	0.075	0	0	0
103000	1	1	1	0	0	0.075	0	0	0
104000	1	1	1	0	0	0.075	0	0	0
105000	1	1	1	0	0	0	0	0	0
106000	1	1	1	0	0	0	0	0	0
107000	1	1	1	0	0	0.075	0	0	0
108000	1	1	1	0	0	0.075	0	0	0
109000	1	1	1	0	0	0.075	0	0	0
110000	1	1	1	0	0	0.175	0	0	0
111000	1	1	1	0	0	0.175	0	0	0
112000	1	1	1	0	0	0.175	0	0	0
113000	1	1	1	0	0	0.175	0	0	0
114000	1	1	1	0	0	0.25	0	0	0
115000	1	1	1	0	0	0.35	0	0	0
116000	1	1	1	0	0	0.35	0	0	0
117000	1	1	1	0	0	0.35	0	0	0
118000	1	1	1	0	0	0.35	0	0	0
119000	1	1	1	0	0	0.425	0	0	0
120000	1	1	1	0	0	0.325	0	0	0
121000	1	1	1	0	0	0.325	0	0	0
122000	1	1	1	0	0	0.325	0	0	0
123000	1	1	1	0	0	0.325	0	0	0
124000	1	1	1	0	0	0.25	0	0	0
125000	1	1	1	0	0	0.225	0	0	0
126000	1	1	1	0	0	0.225	0	0	0
127000	1	1	1	0	0	0.15	0	0	0
128000	1	1	1	0	0	0.15	0	0	0
129000	1	1	1	0	0	0.15	0	0	0
130000	1	1	1	0	0	0.15	0	0	0
131000	1	1	1	0	0	0.15	0	0	0
132000	1	1	1	0	0	0.15	0	0	0
133000	1	1	1	0	0	0.25	0	0	0
134000	1	1	1	0	0	0.25	0	0	0
135000	1	1	1	0	0	0.275	0	0	0
136000	1	1	1	0	0	0.275	0	0	0
137000	1	1	1	0	0	0.35	0	0	0
138000	1	1	1	0	0	0.45	0	0	0
139000	1	1	1	0	0	0.375	0	0	0
140000	1	1	1	0	0	0.375	0	0	0
141000	1	1	1	0	0	0.375	0	0	0
142000	1	1	1	0	0	0.375	0	0	0
143000	1	1	1	0	0	0.35	0	0	0
144000	1	1	1	0	0	0.35	0	0	0
145000	1	1	1	0	0	0.325	0	0	0.075
146000	1	1	1	0	0	0.325	0	0	0.075
147000	1	1	1	0	0	0.25	0	0	0.075
148000	1	1	1	0	0	0.15	0	0	0.075
149000	1	1	1	0	0	0.15	0	0	0.075
150000	1	1	1	0	0	0.15	0	0	0.075
151000	1	1	1	0	0	0.15	0	0	0.075
152000	1	1	1	0	0	0.15	0	0	0.075
153000	1	1	1	0	0	0.075	0	0	0.075
154000	1	1	1	0	0	0.075	0	0	0.075
155000	1	1	1	0	0	0	0	0	0
156000	1	1	1	0	0	0	0	0	0
157000	1	1	1	0	0	0	0	0	0
158000	1	1	1	0	0	0	0	0	0
159000	1	1	1	0	0	0	0	0	0
160000	1	1	1	0	0	0	0	0	0
161000	1	1	1	0	0	0.075	0	0	0
162000	1	1	1	0	0	0.075	0	0	0
163000	1	1	1	0	0	0.075	0	0	0
164000	1	1	1	0	0	0.15	0	0	0
165000	1	1	1	0	0	0.225	0	0	0
166000	1	1	1	0	0	0.325	0	0	0
167000	1	1	1	0	0	0.325	0	0	0
168000	1	1	1	0	0	0.425	0	0	0
169000	1	1	1	0	0	0.425	0	0	0
170000	1	1	1	0	0	0.425	0	0	0
171000	1	1	1	0	0	0.425	0	0	0
172000	1	1	1	0	0	0.425	0	0	0
173000	1	1	1	0	0	0.425	0	0	0
174000	1	1	1	0	0	0.35	0	0	0
175000	1	1	1	0	0	0.275	0	0	0
176000	1	1	1	0	0	0.175	0	0	0
177000	1	1	1	0	0	0.175	0	0	0
178000	1	1	1	0	0	0.175	0	0	0
179000	1	1	1	0	0	0.175	0	0	0
180000	1	1	1	0	0	0.175	0	0	0
181000	1	1	1	0	0.05	0.2	0	0	0
182000	1	1	1	0	0.05	0.2	0	0	0
183000	1	1	1	0	0.05	0.2	0	0	0
184000	1	1	1	0	0.05	0.2	0	0	0
185000	1	1	1	0	0.05	0.2	0	0	0
186000	1	1	1	0	0.05	0.275	0	0	0
187000	1	1	1	0	0.05	0.275	0	0	0
188000	1	1	1	0	0.05	0.275	0	0	0
189000	1	1	1	0	0.05	0.375	0	0	0
190000	1	1	1	0	0.05	0.375	0	0	0
191000	1	1	1	0	0	0.275	0	0	0
192000	1	1	1	0	0	0.35	0	0	0
193000	1	1	1	0	0	0.35	0	0	0
194000	1	1	1	0	0	0.35	0	0	0
195000	1	1	1	0	0	0.35	0	0	0
196000	1	1	1	0	0	0.275	0	0	0
197000	1	1	1	0	0	0.275	0	0	0
198000	1	1	1	0	0	0.175	0	0	0
199000	1	1	1	0	0	0.075	0	0	0
200000	1	1	1	0	0	0.075	0	0	0
201000	1	1	1	0	0	0.0833333	0	0	0
202000	1	1	1	0	0	0	0	0	0
203000	1	1	1	0	0	0	0	0	0
204000	1	1	1	0	0	0	0	0	0
205000	1	1	1	0	0	0	0	0	0
206000	1	1	1	0	0	0	0	0	0
207000	1	1	1	0	0	0	0	0	0
208000	1	1	1	0	0	0	0	0	0
209000	1	1	1	0	0	0	0	0	0
