# Supplementary material
Source: ML conference proceedings conference paper supplement (https://openreview.net/forum?id=Lb8ZnWW_In6)

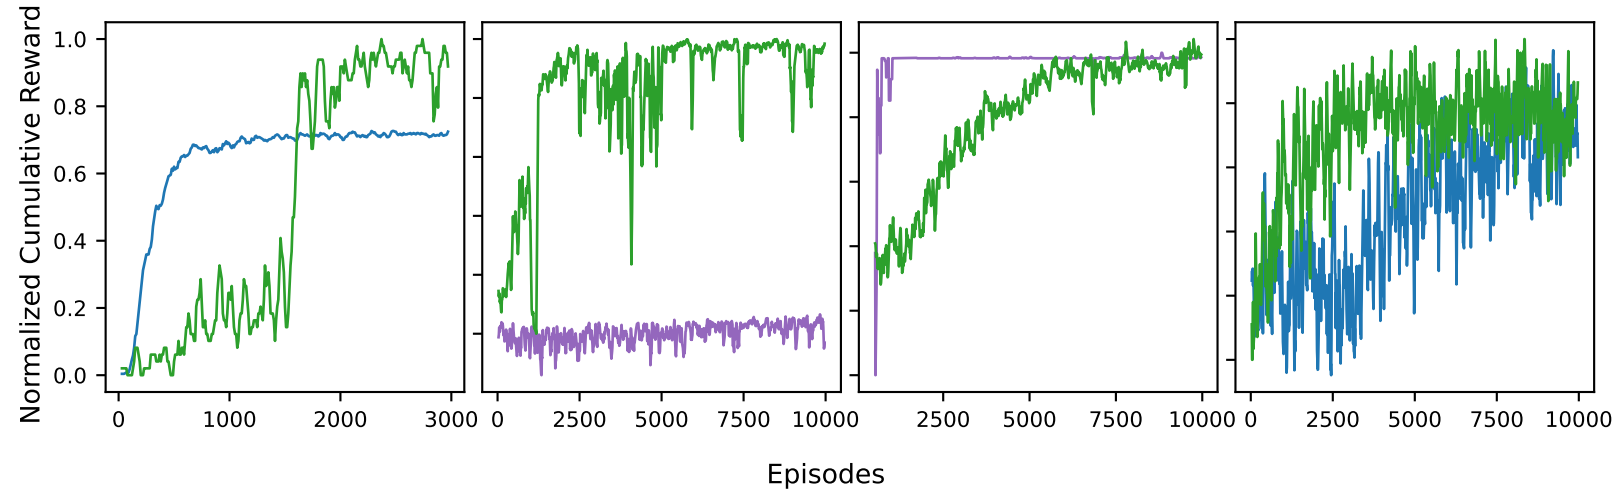

Supplement: supplementary_material [file attachment]

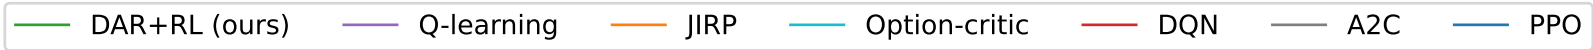

Office World

Wumpus World

Taxi World

Water World

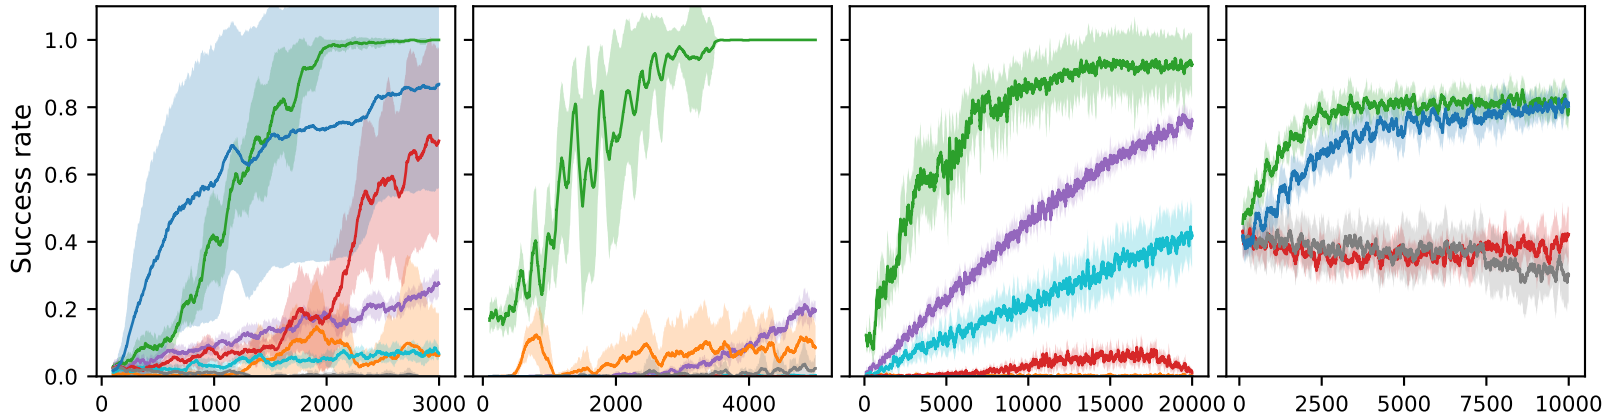

Supplement: supplementary_material [file attachment]
